# Supplementary material for: Causal relationship between serum metabolites and juvenile idiopathic arthritis: a mendelian randomization study
Source: Springer Nature journal article supplement (doi:10.1186/s12969-024-00986-0), 2024-05-09
Supplement: MOESM13 [file 27072746]

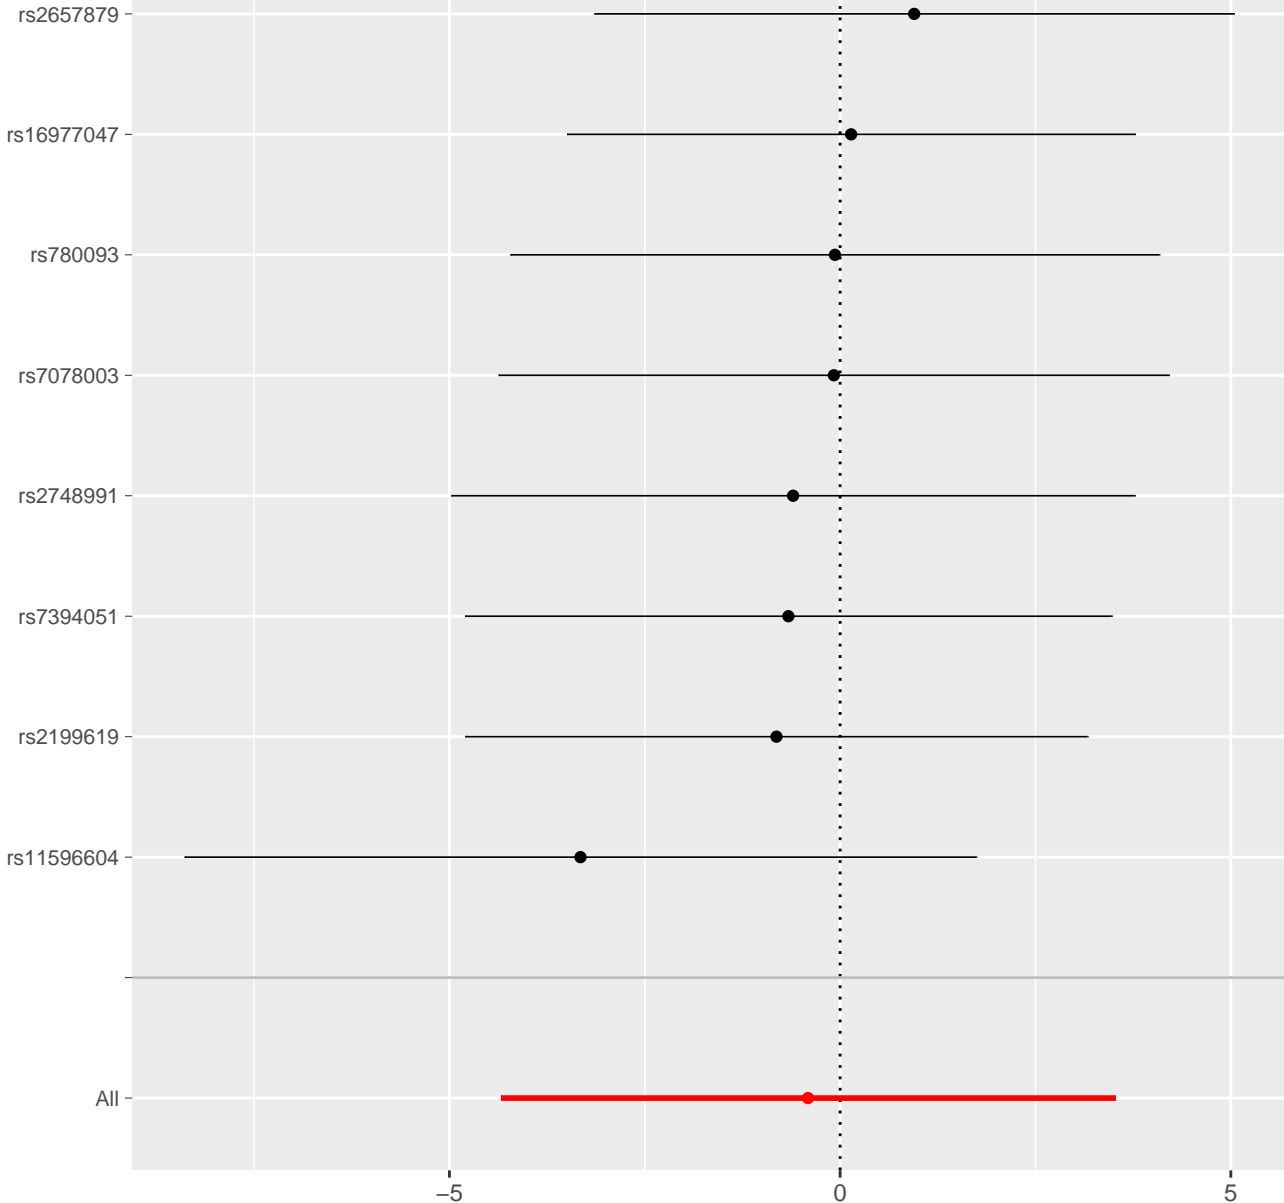

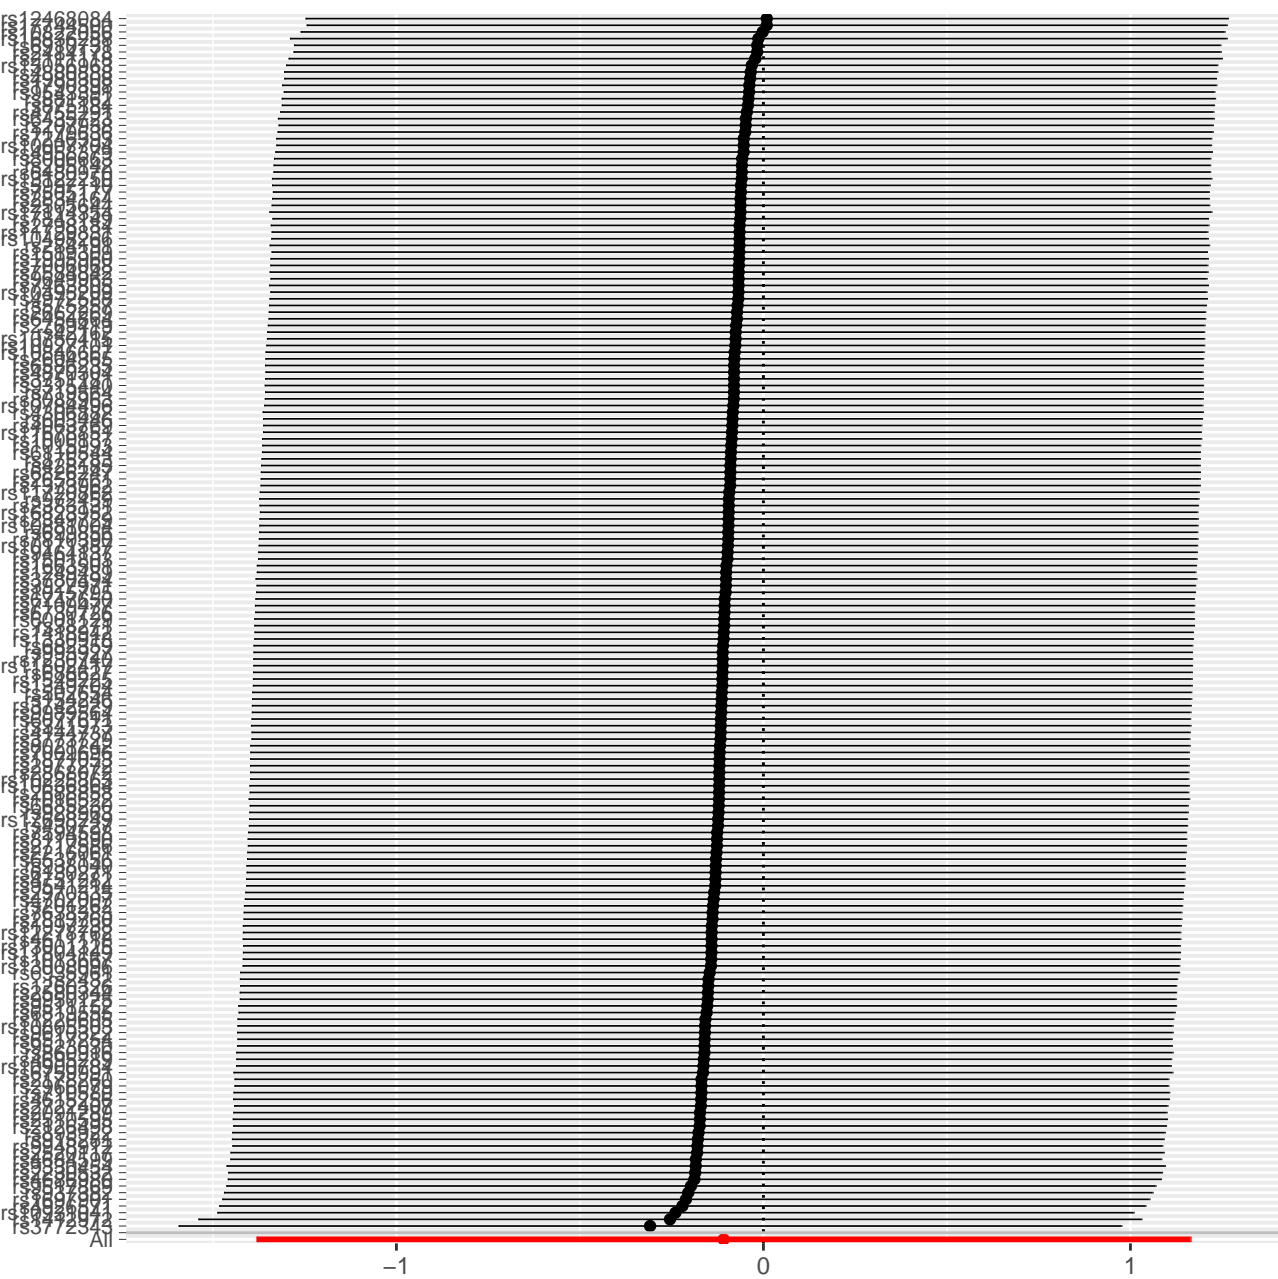

MR leave-one-out sensitivity analysis for  
'M00054.metal.pos.txt.gz' on 'JUVEN\_ARTHR.gz'

rs7014133

rs715

rs1527683

rs2176664

All

-15

-10

-5

0

5

10

MR leave-one-out sensitivity analysis for  
'M00059.metal.pos.txt.gz' on 'JUVEN\_ARTHR.gz'

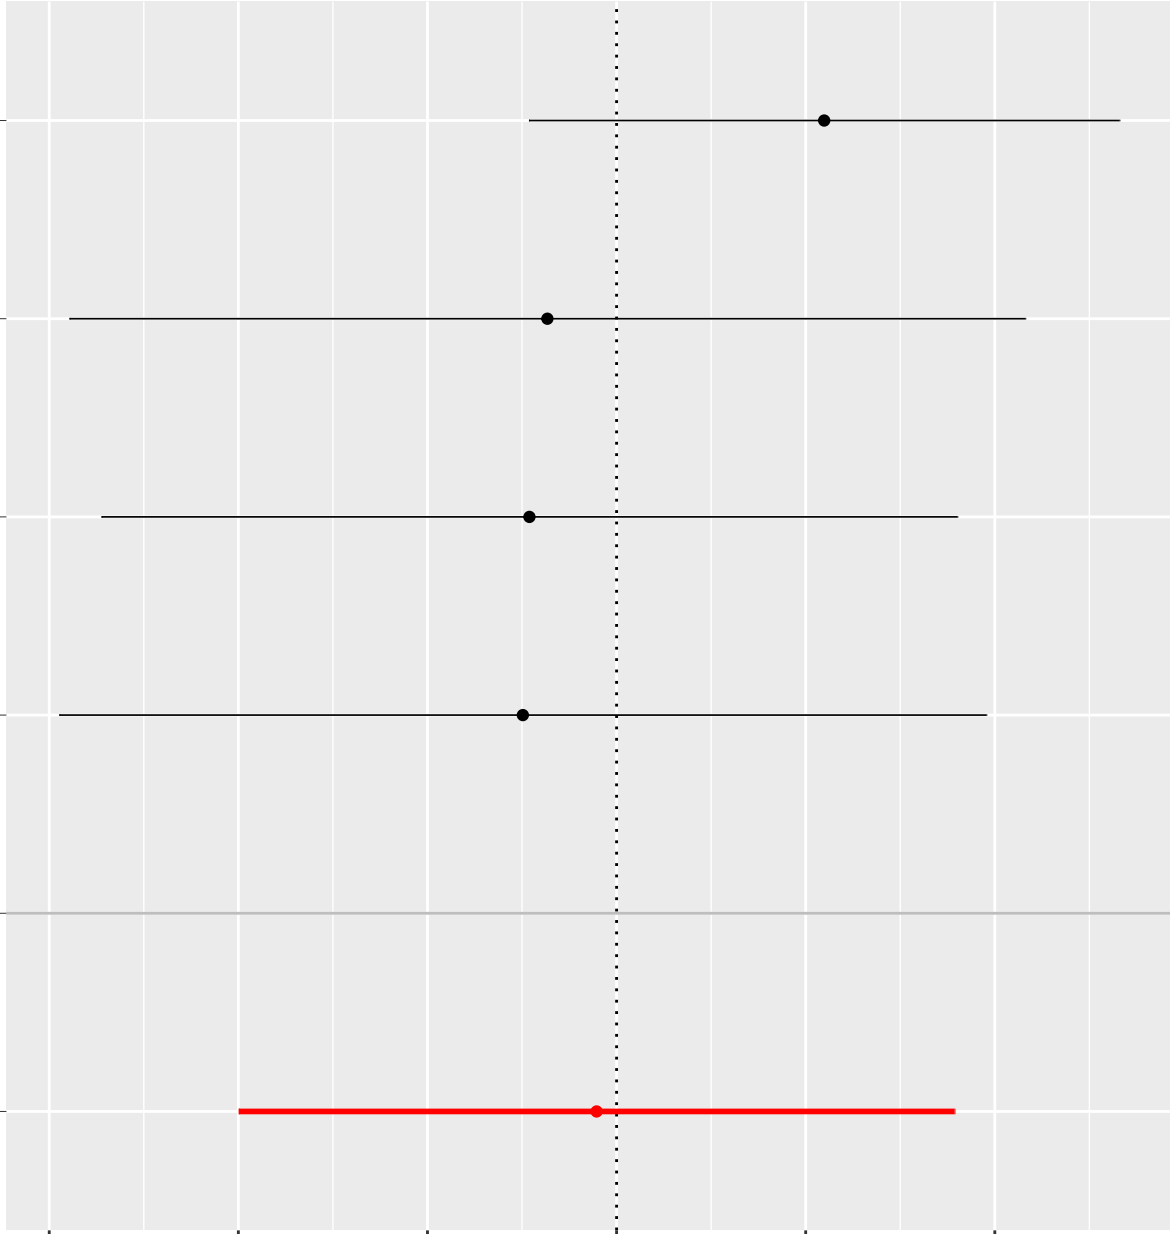

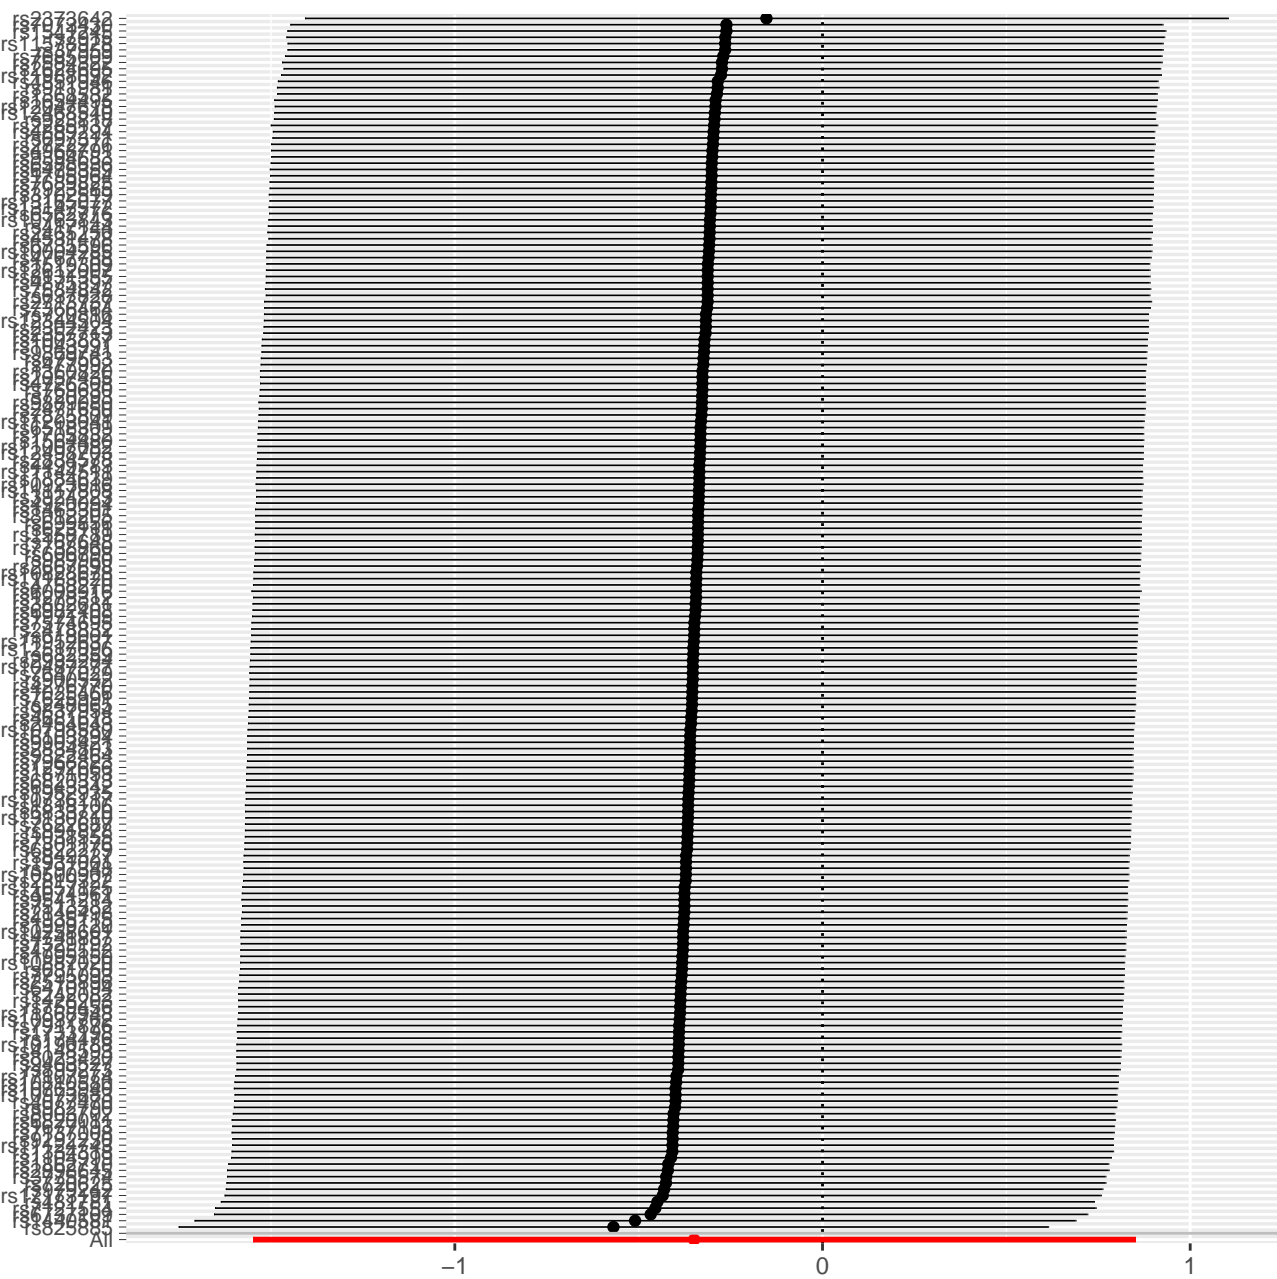

MR leave-one-out sensitivity analysis for  
'M00060.metal.pos.txt.gz' on 'JUVEN\_ARTHR.gz'

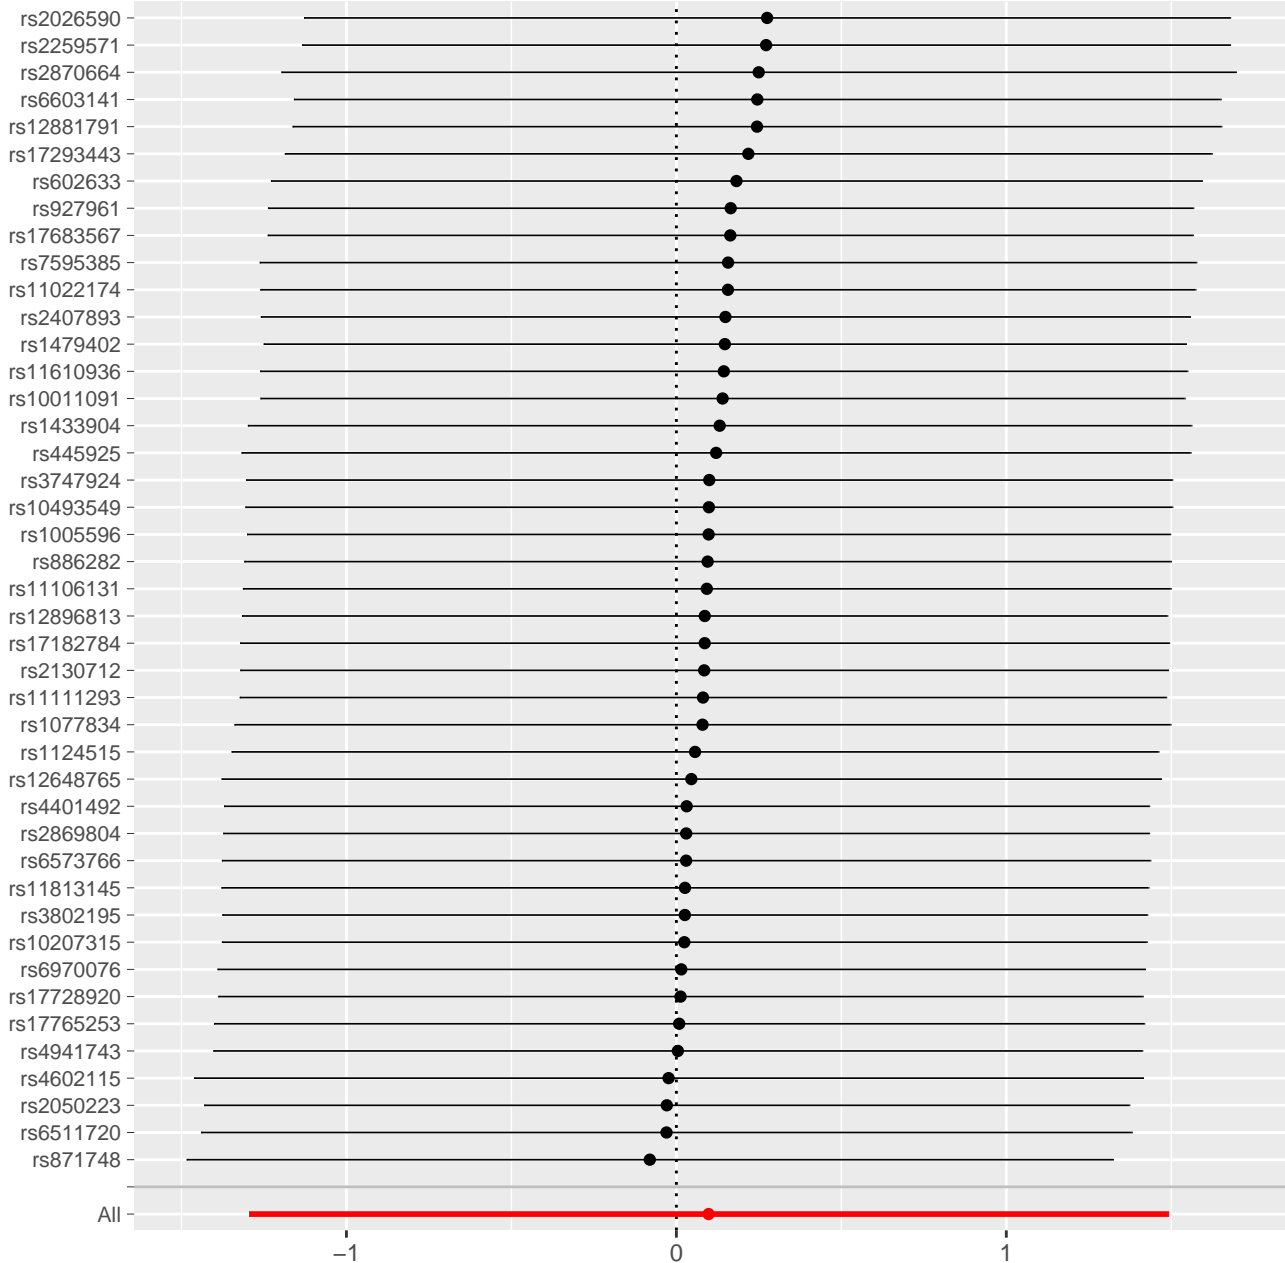

MR leave-one-out sensitivity analysis for 'M00063.metal.pos.txt.gz' on 'JUVEN\_ARTHR.gz'

rs1565225

rs2905873

rs10050054

rs6831907

rs1498694

All

MR leave-one-out sensitivity analysis for  
'M00064.metal.pos.txt.gz' on 'JUVEN\_ARTHR.gz'

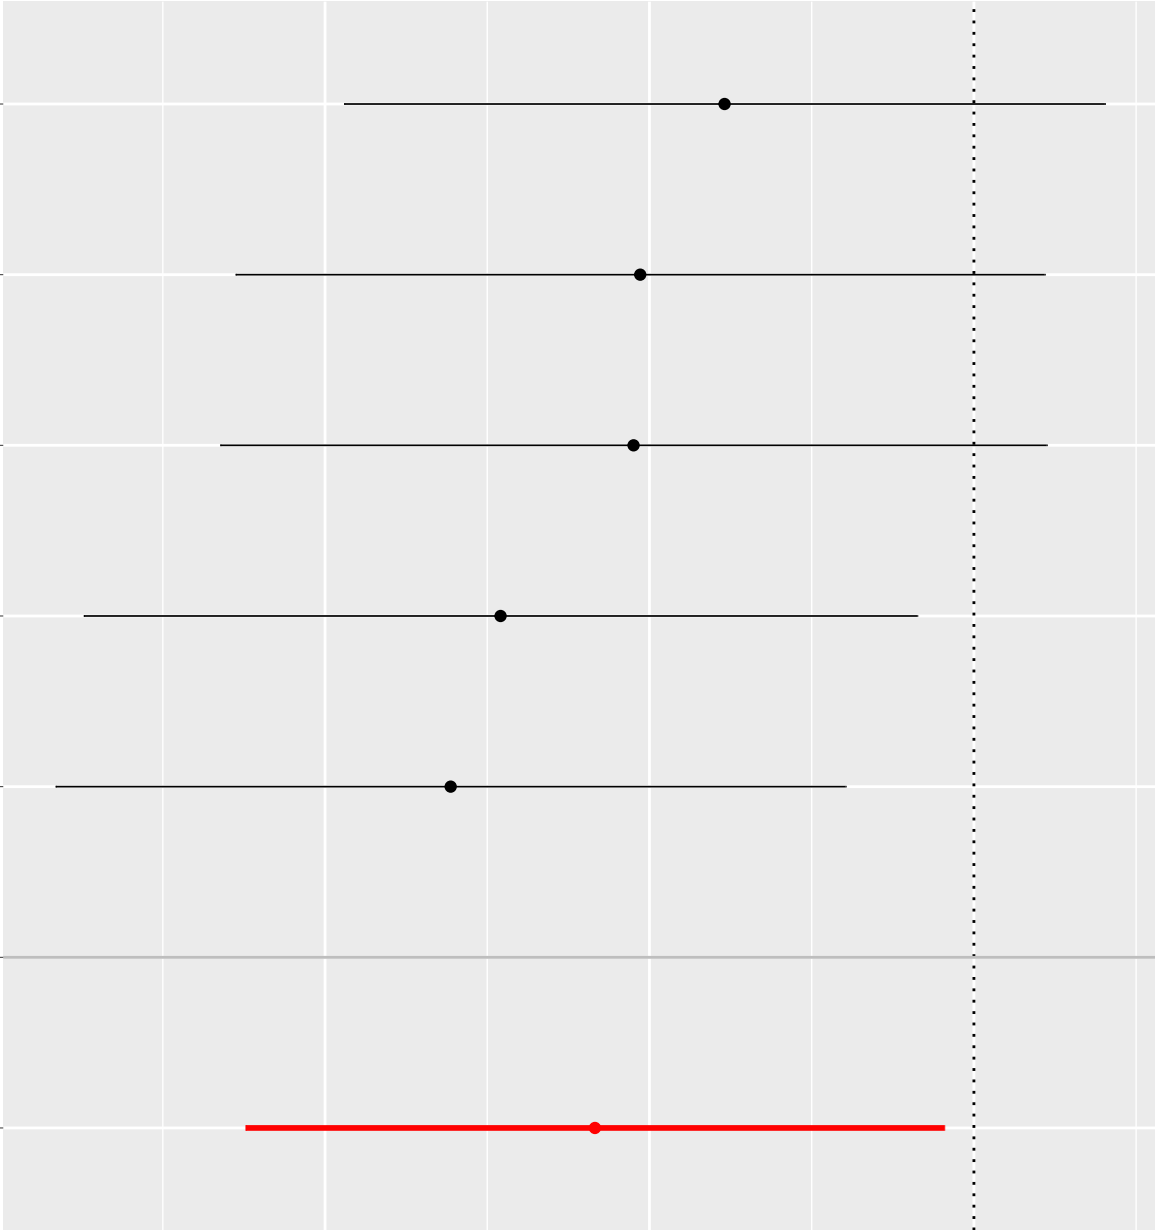

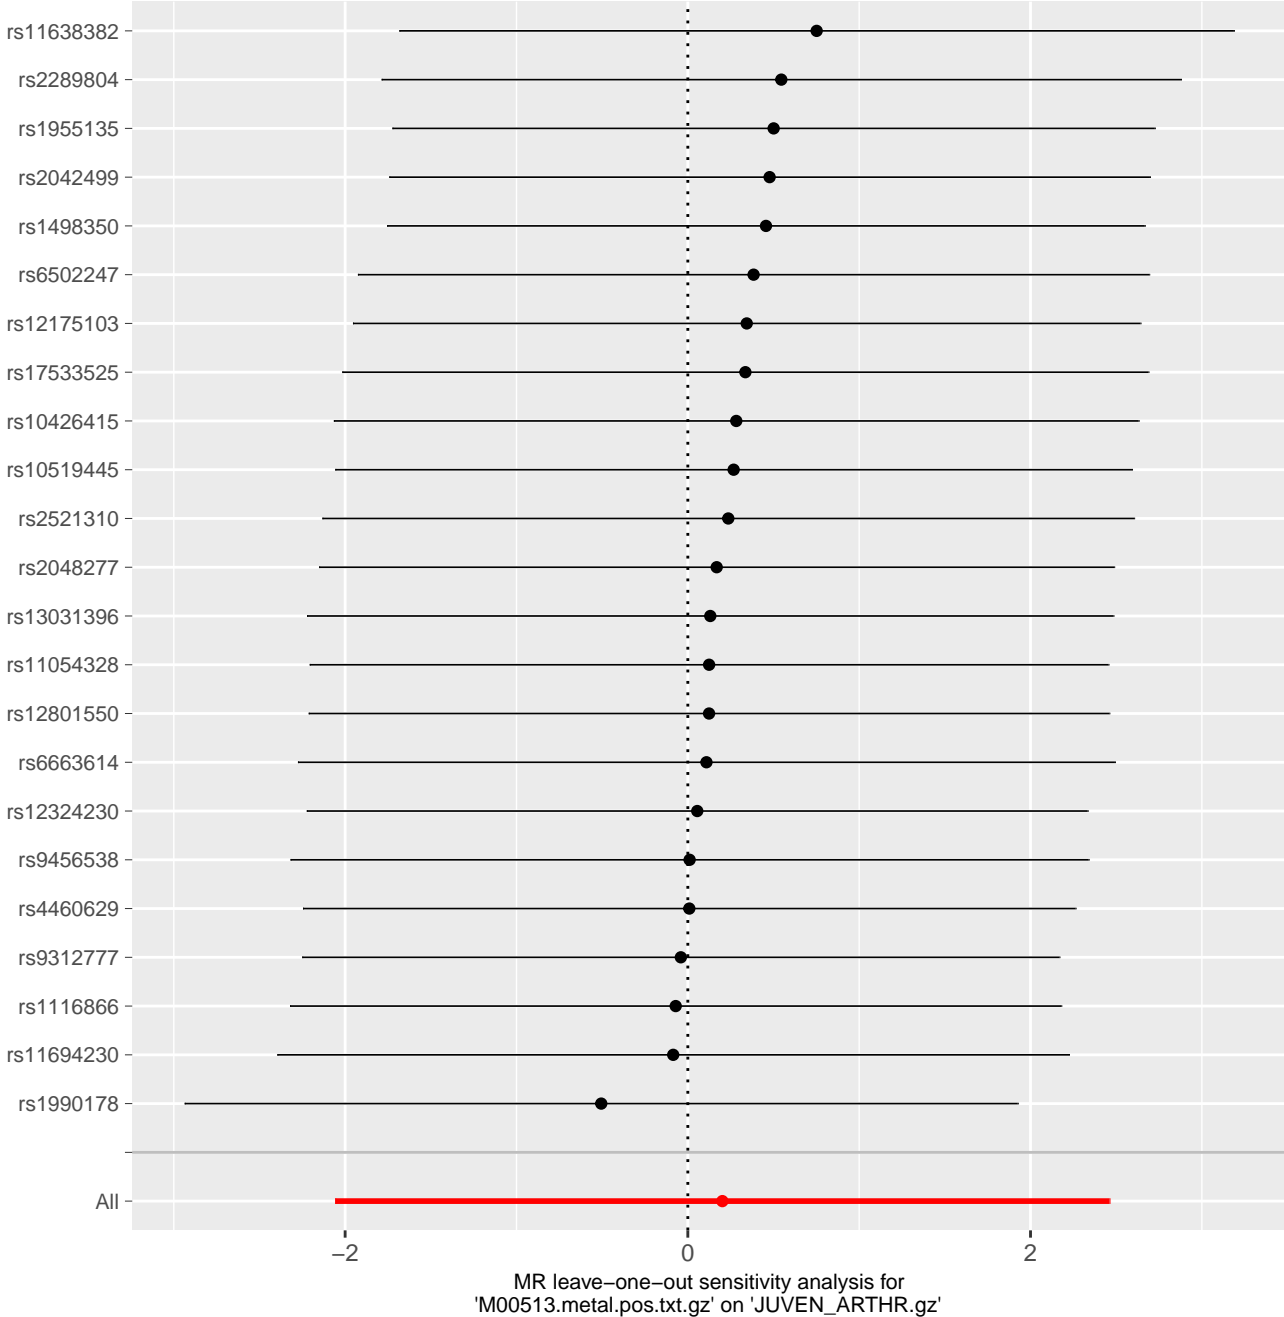

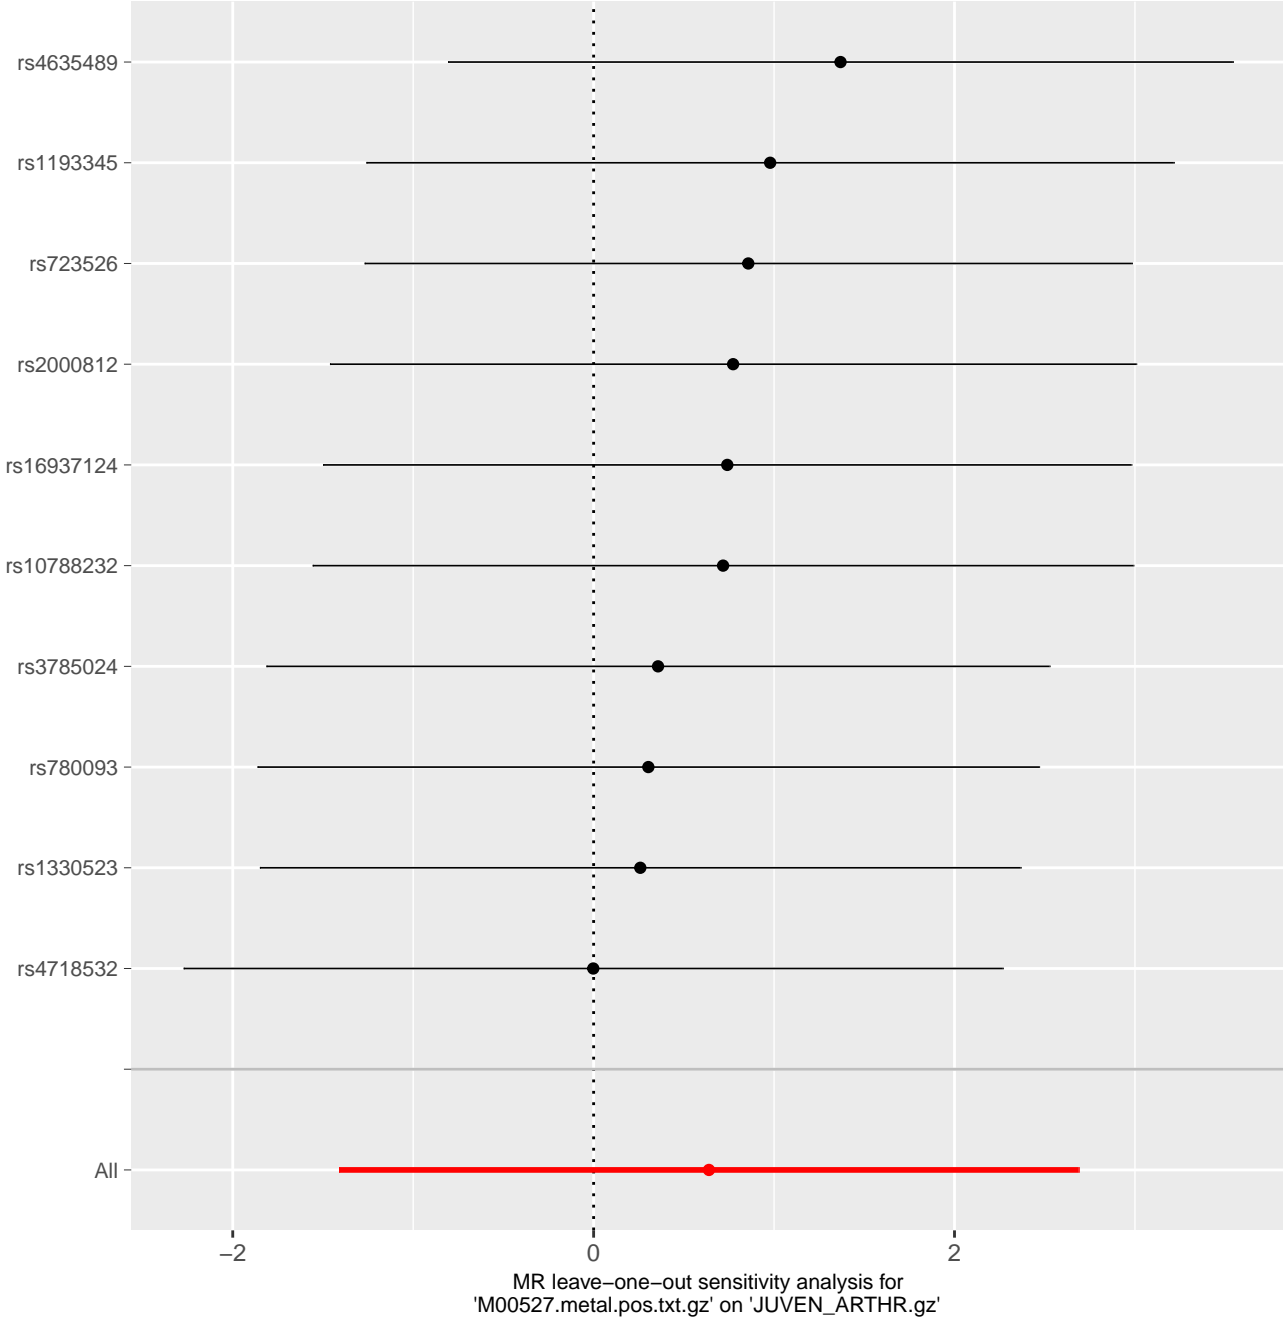



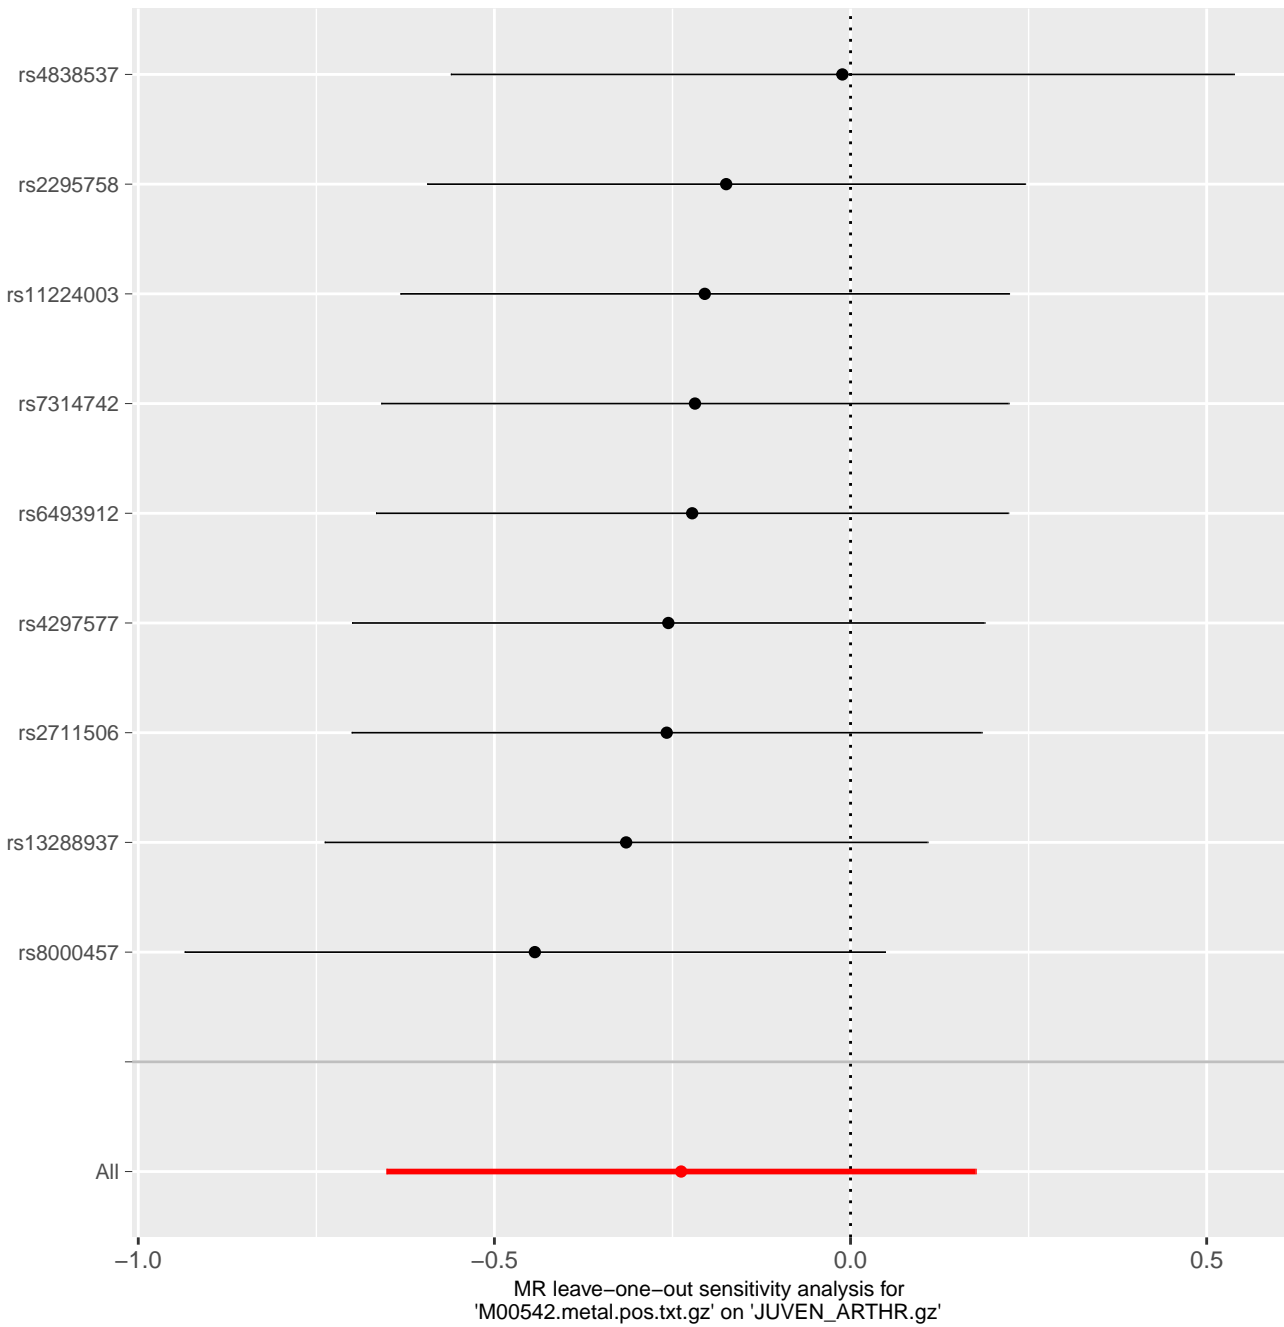

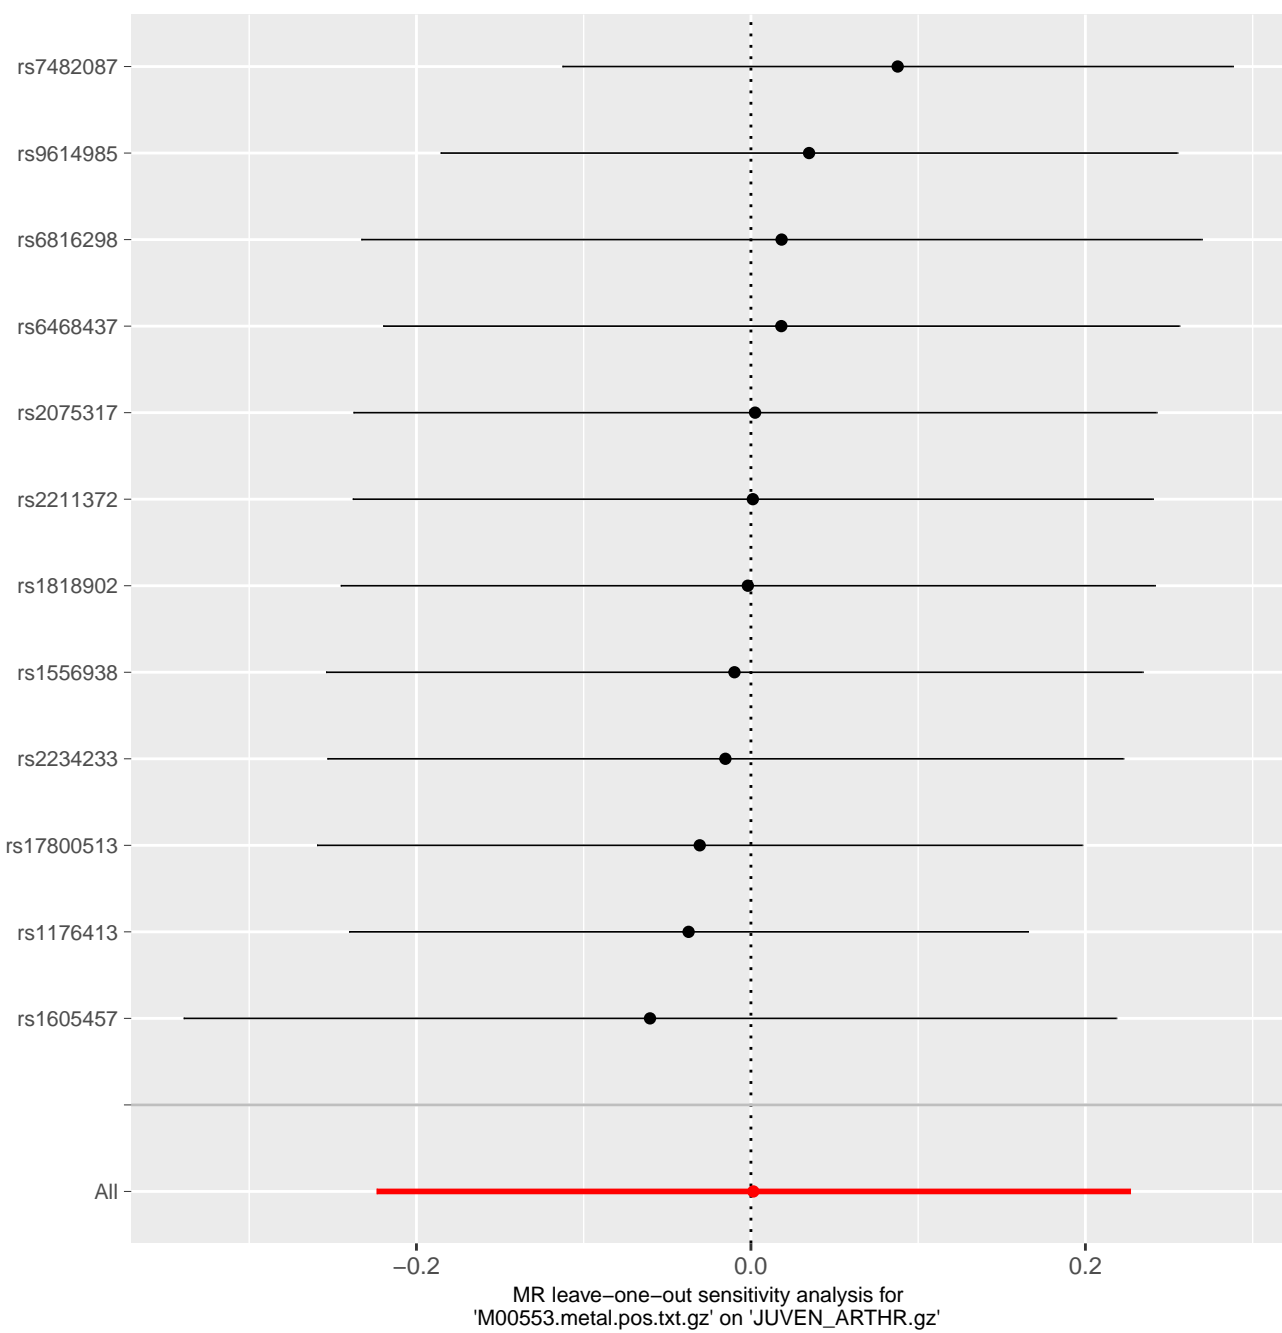

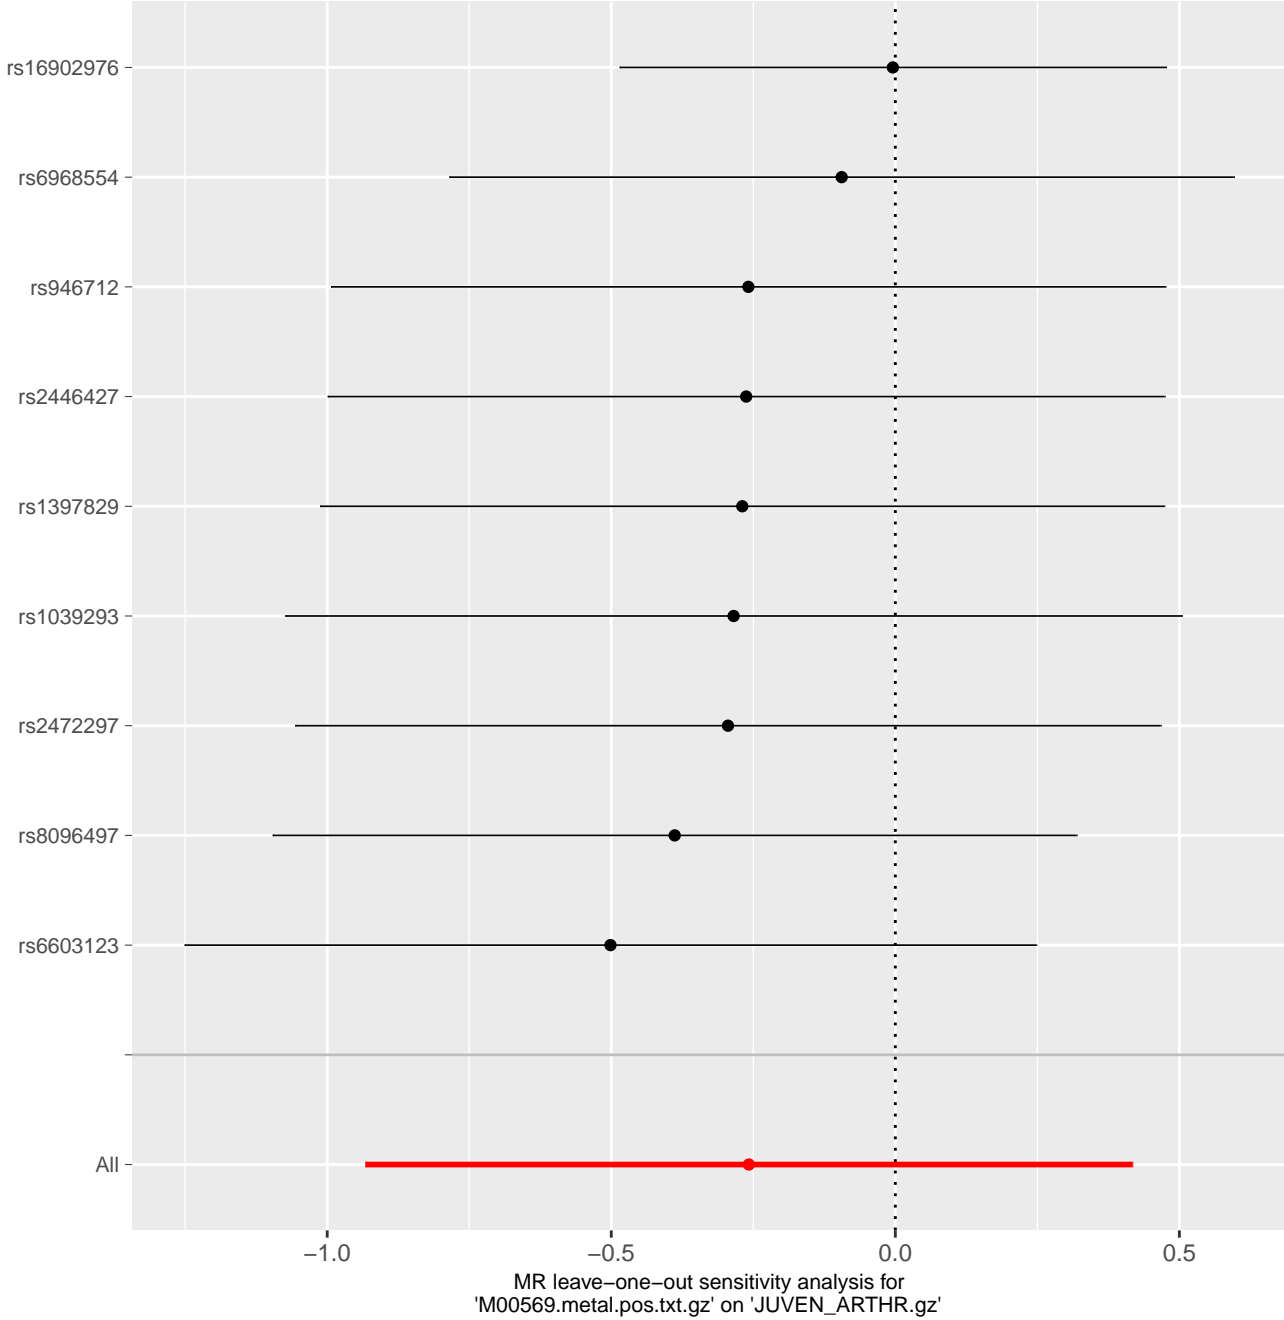

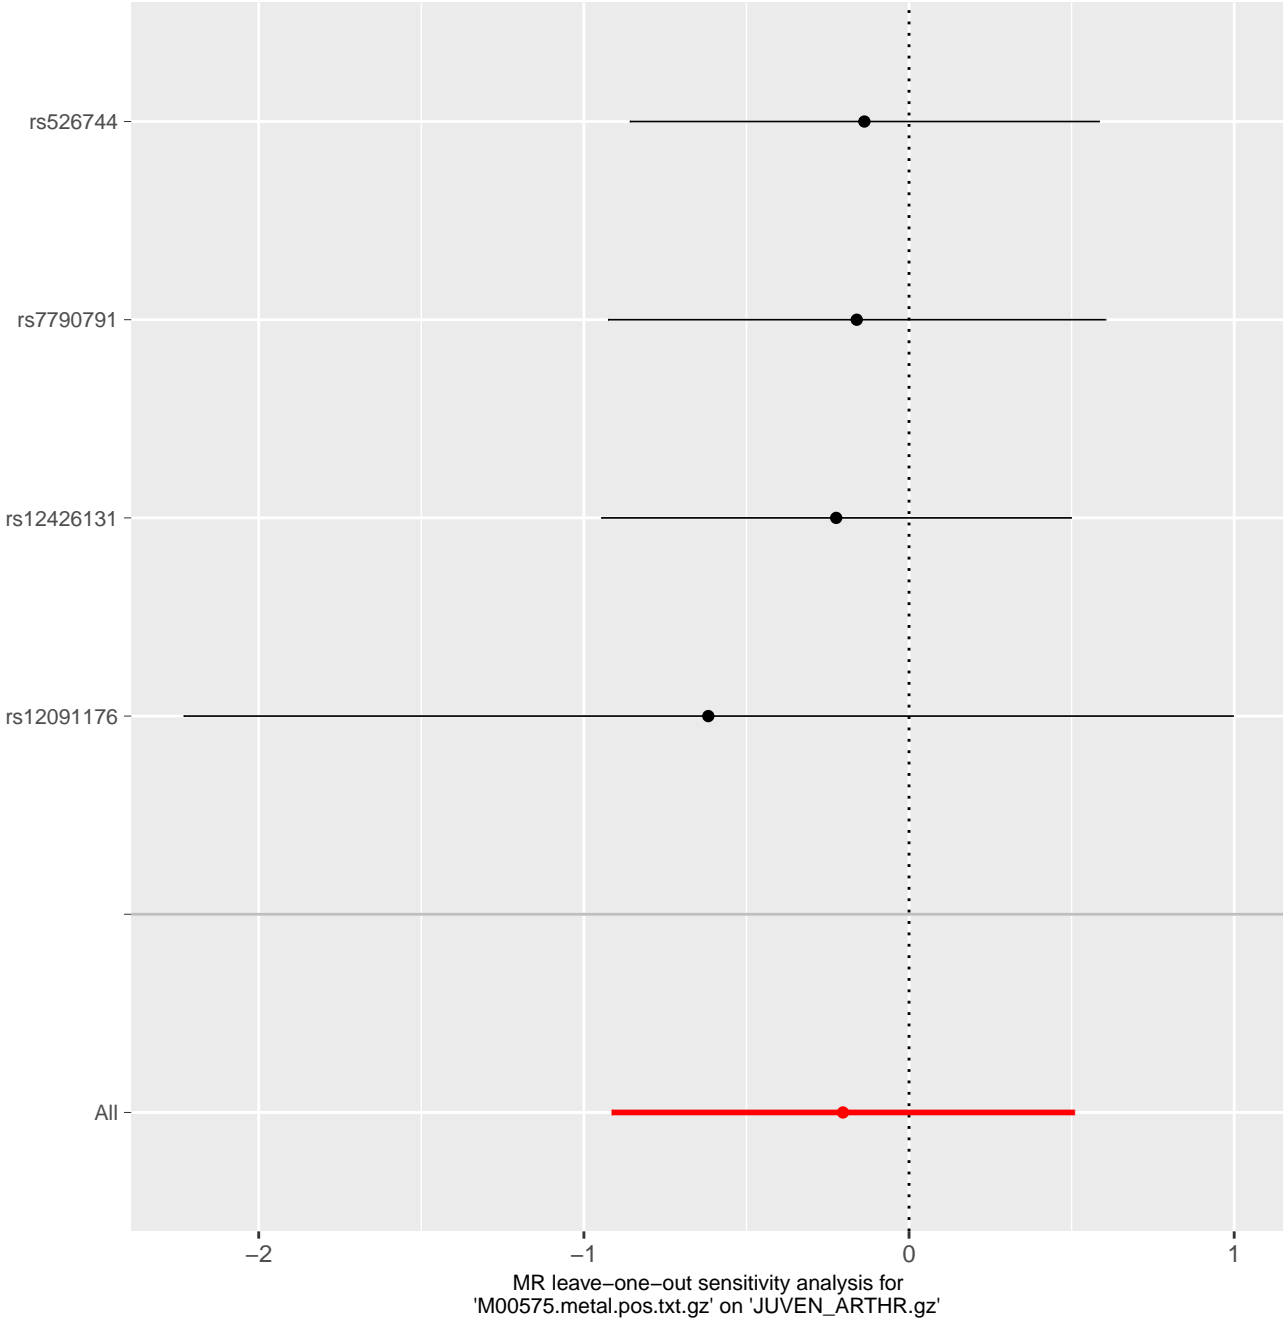

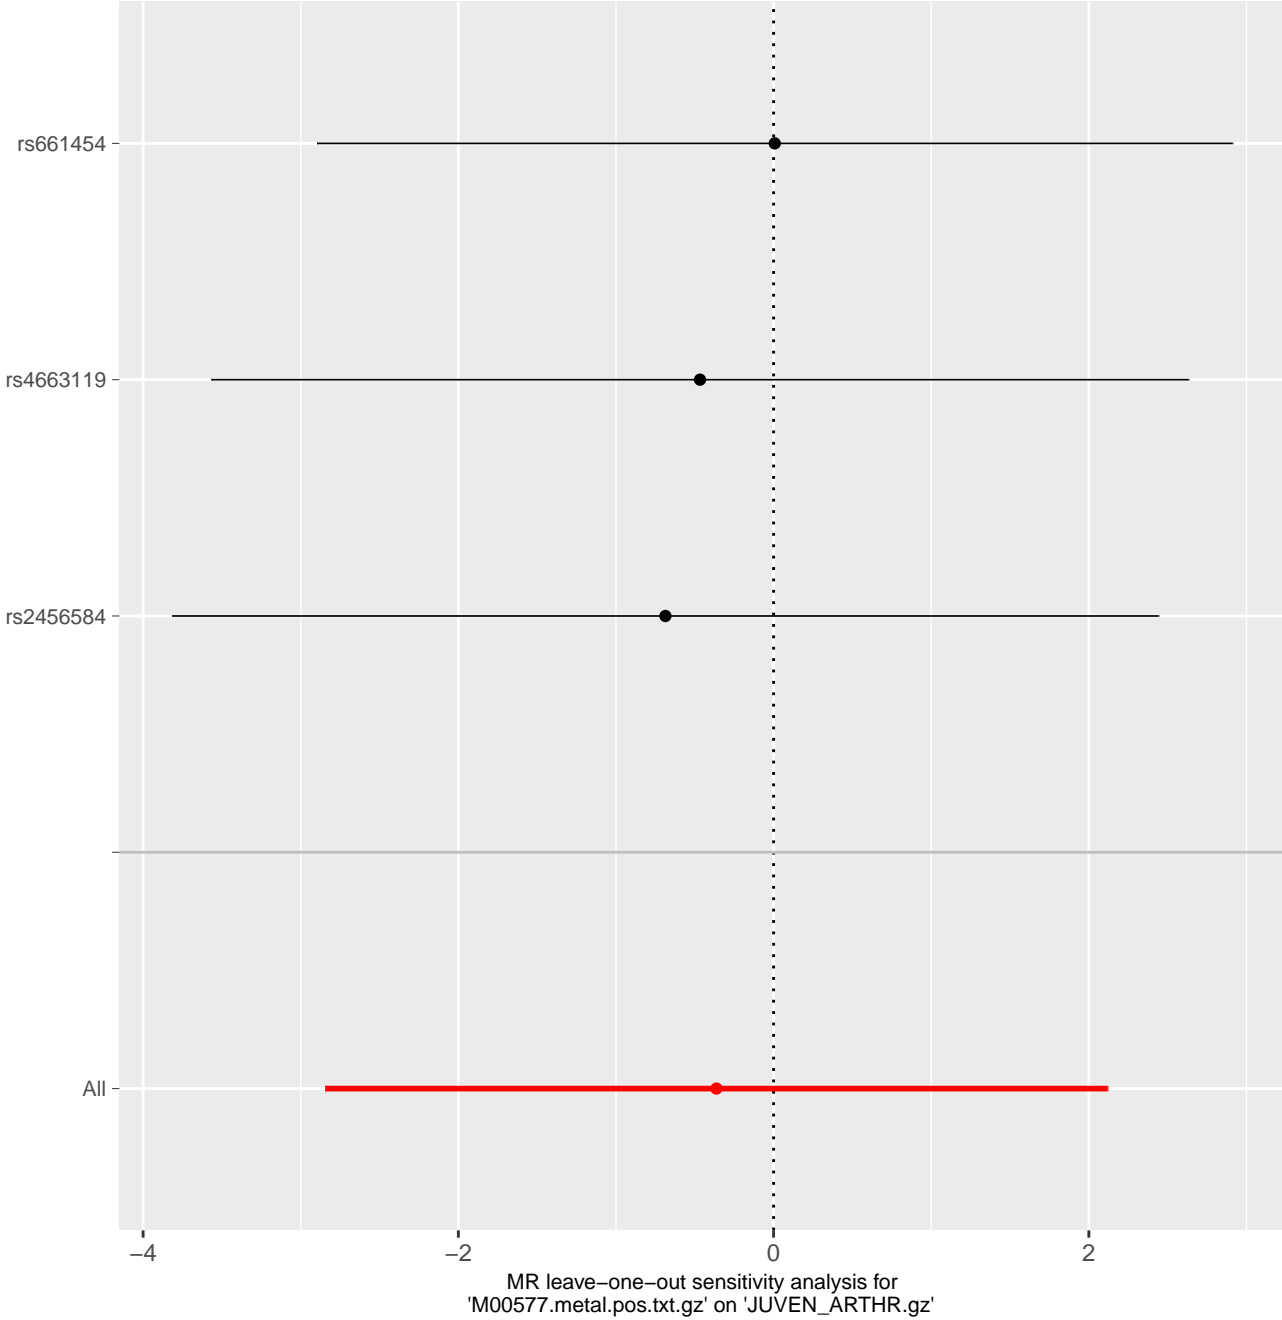

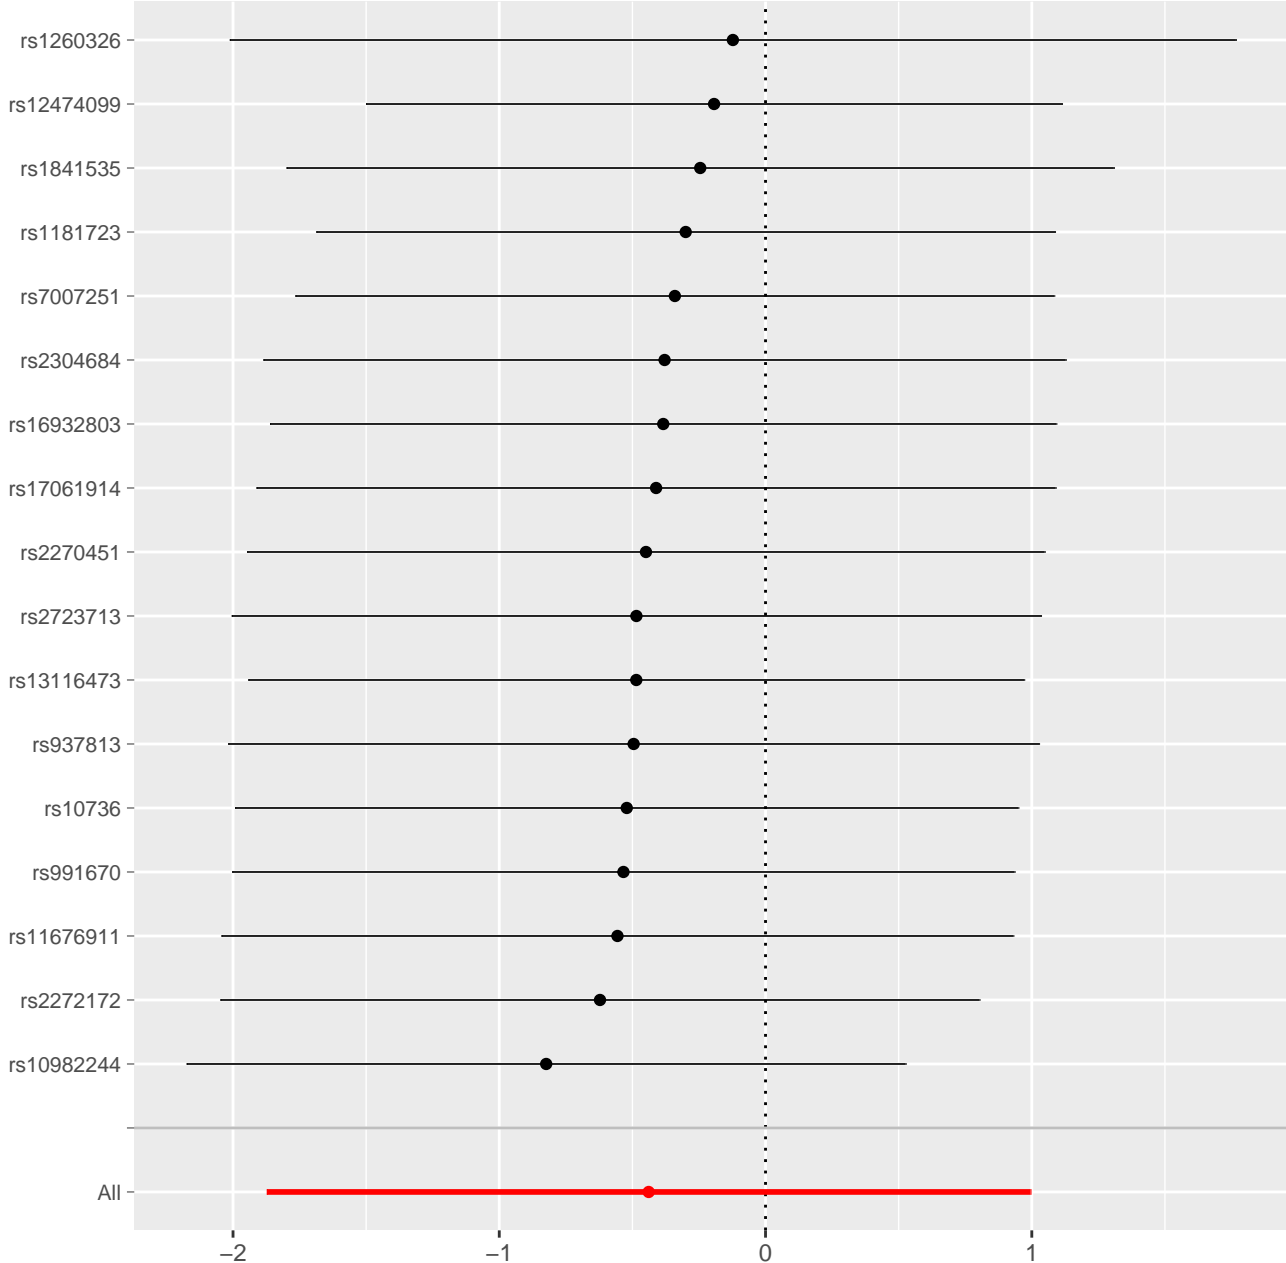

MR leave-one-out sensitivity analysis for 'M00584.metal.pos.txt.gz' on 'JUVEN\_ARTHR.gz'

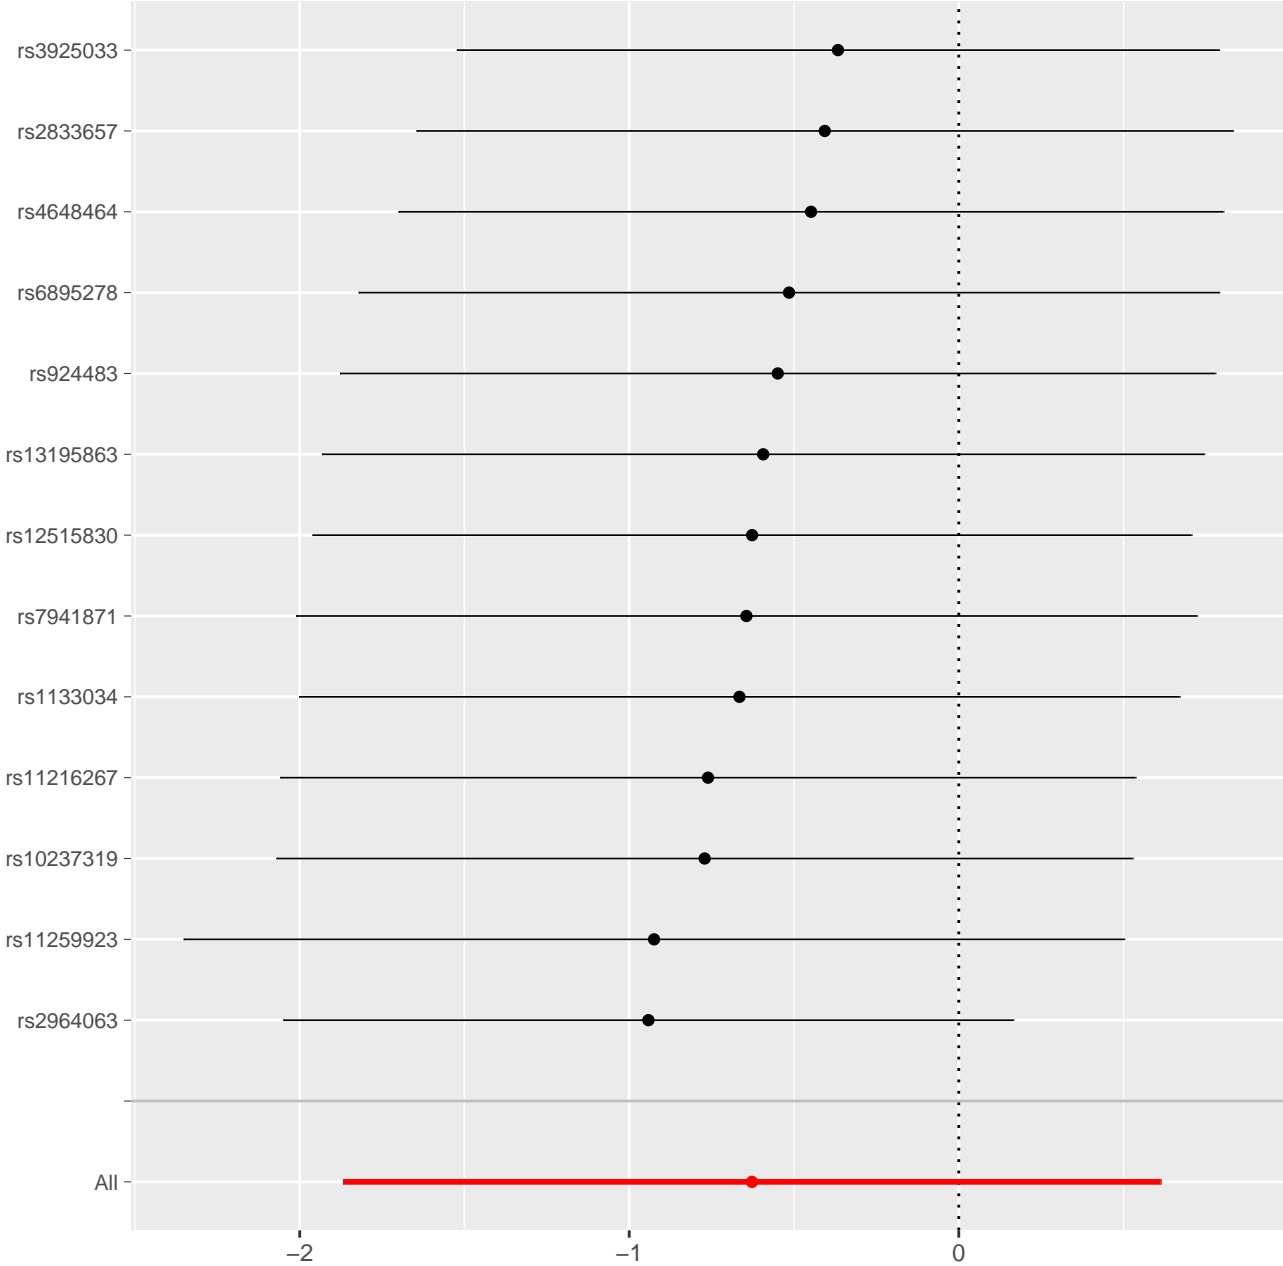

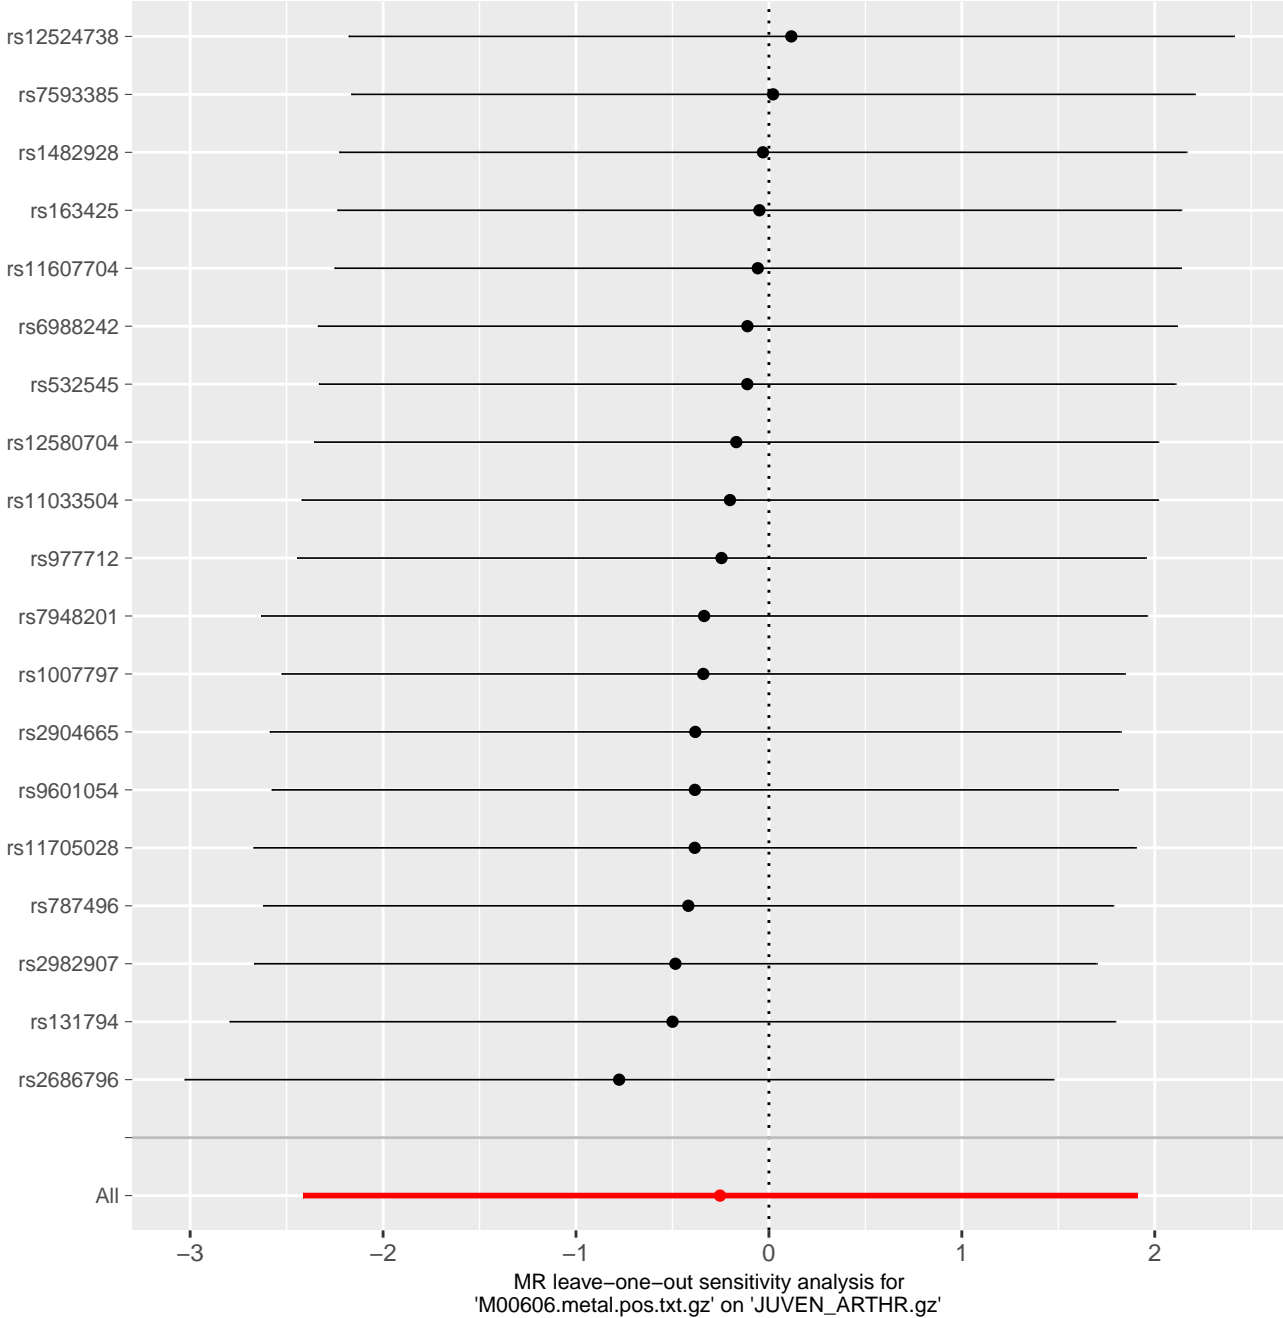



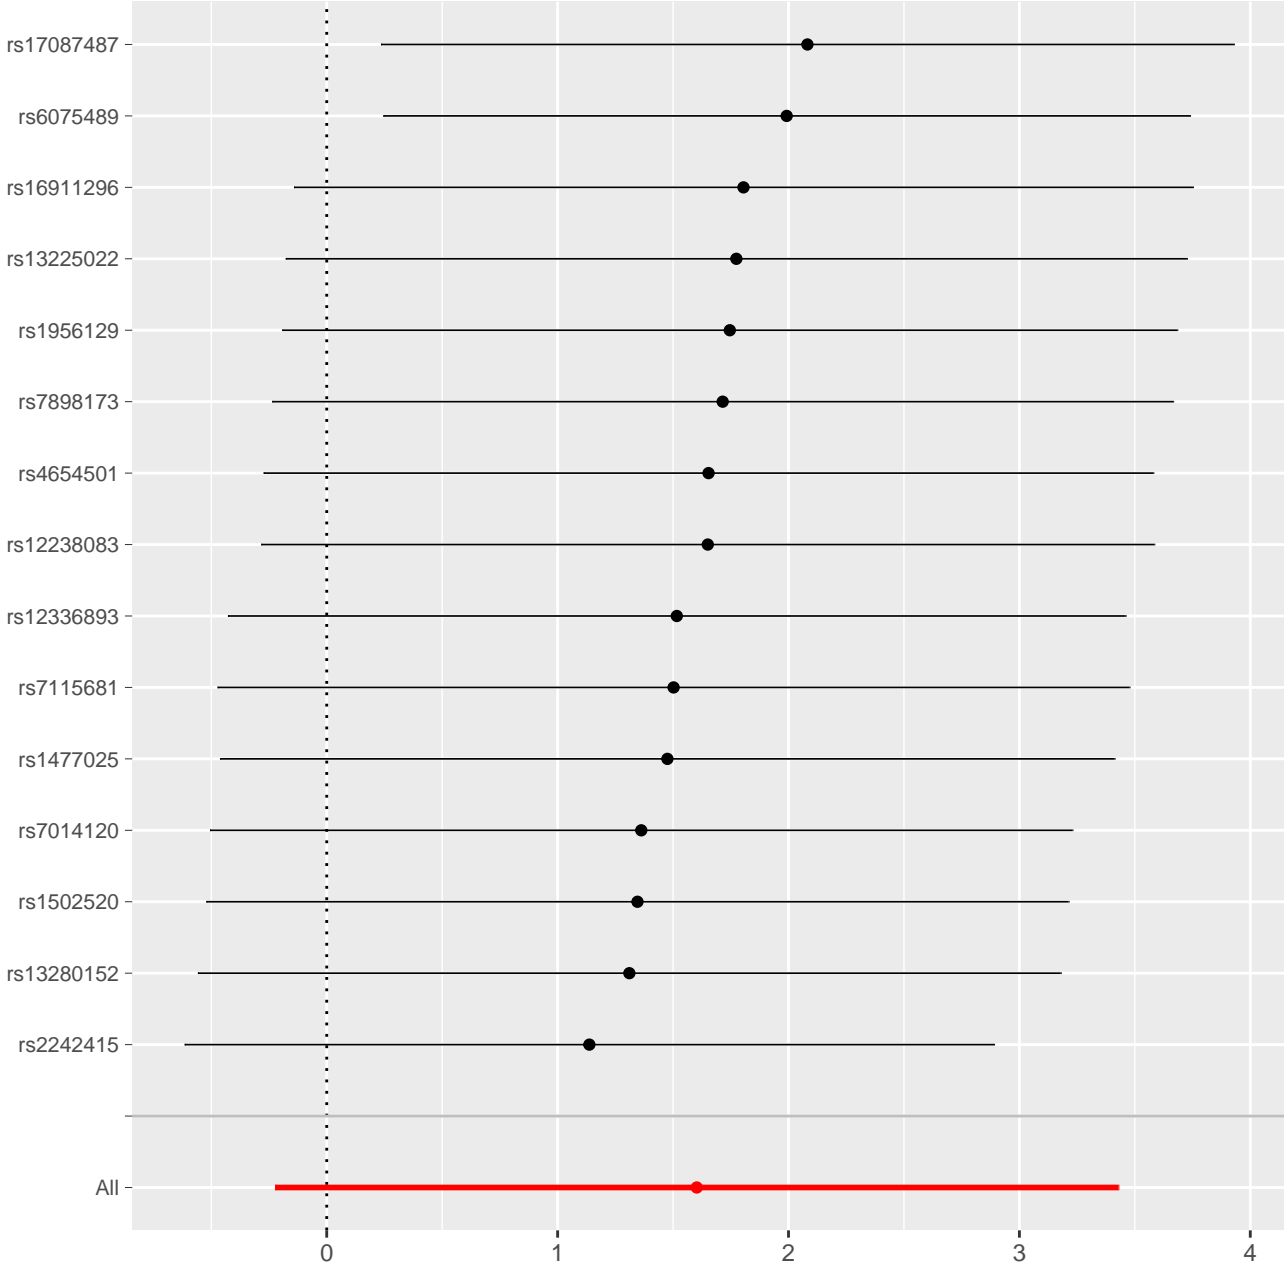

MR leave-one-out sensitivity analysis for 'M01105.metal.pos.txt.gz' on 'JUVEN\_ARTHR.gz'

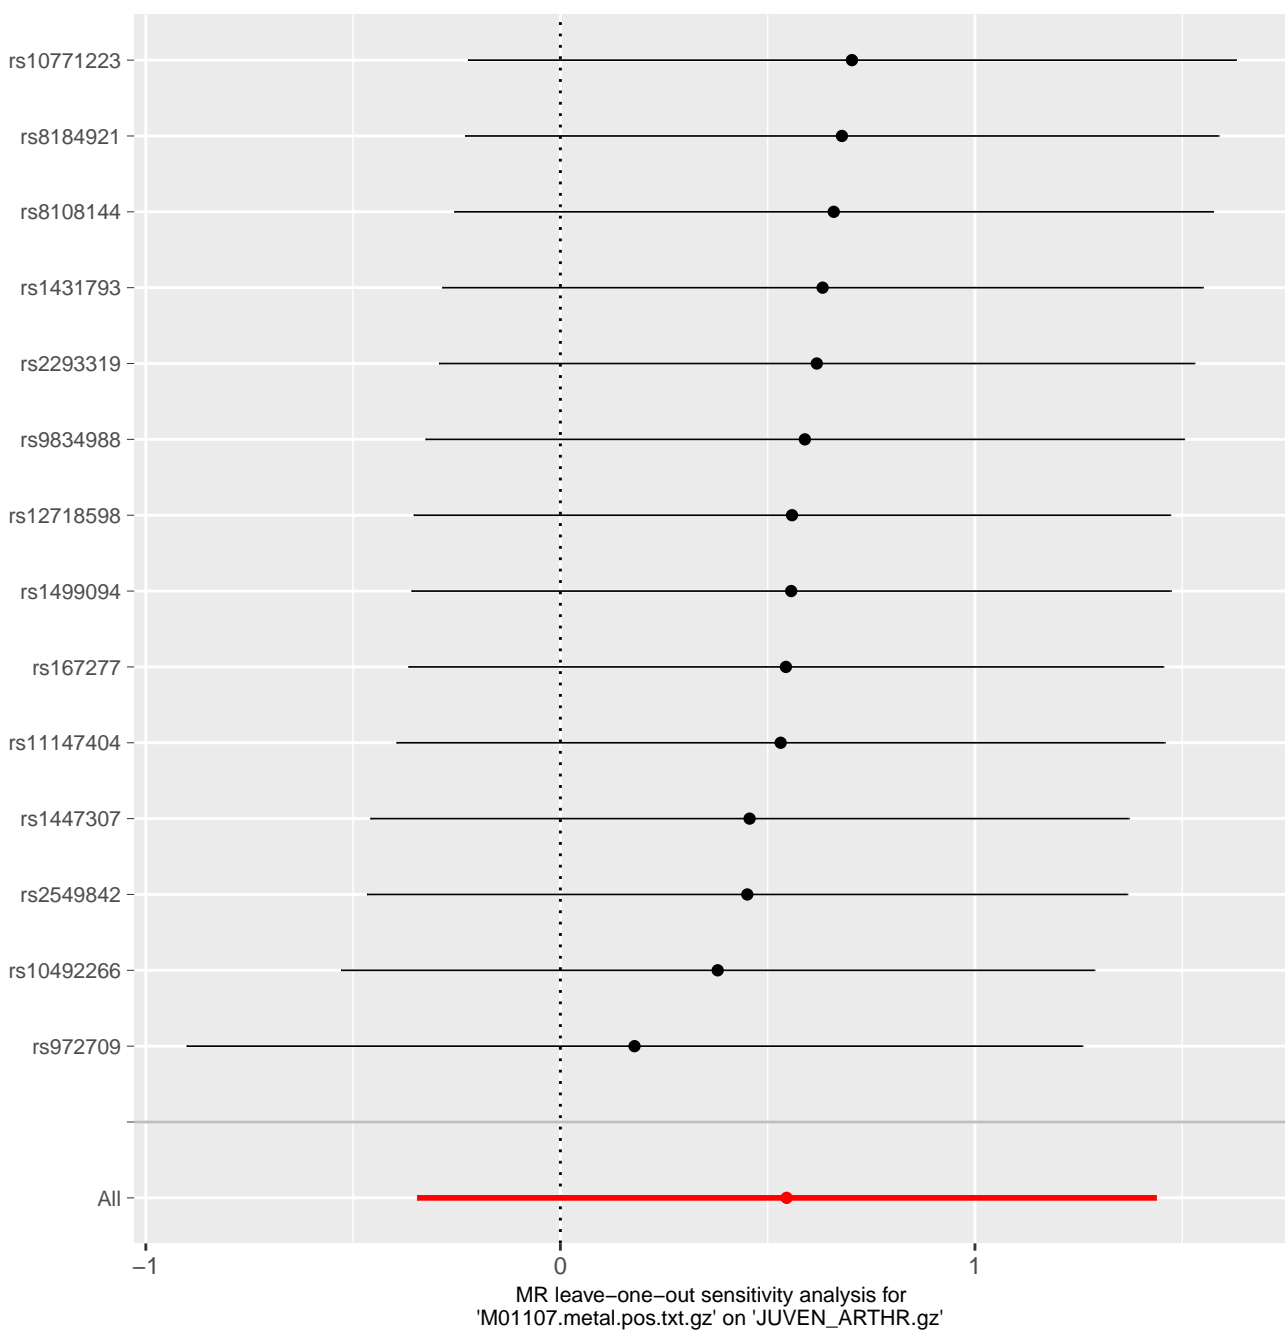

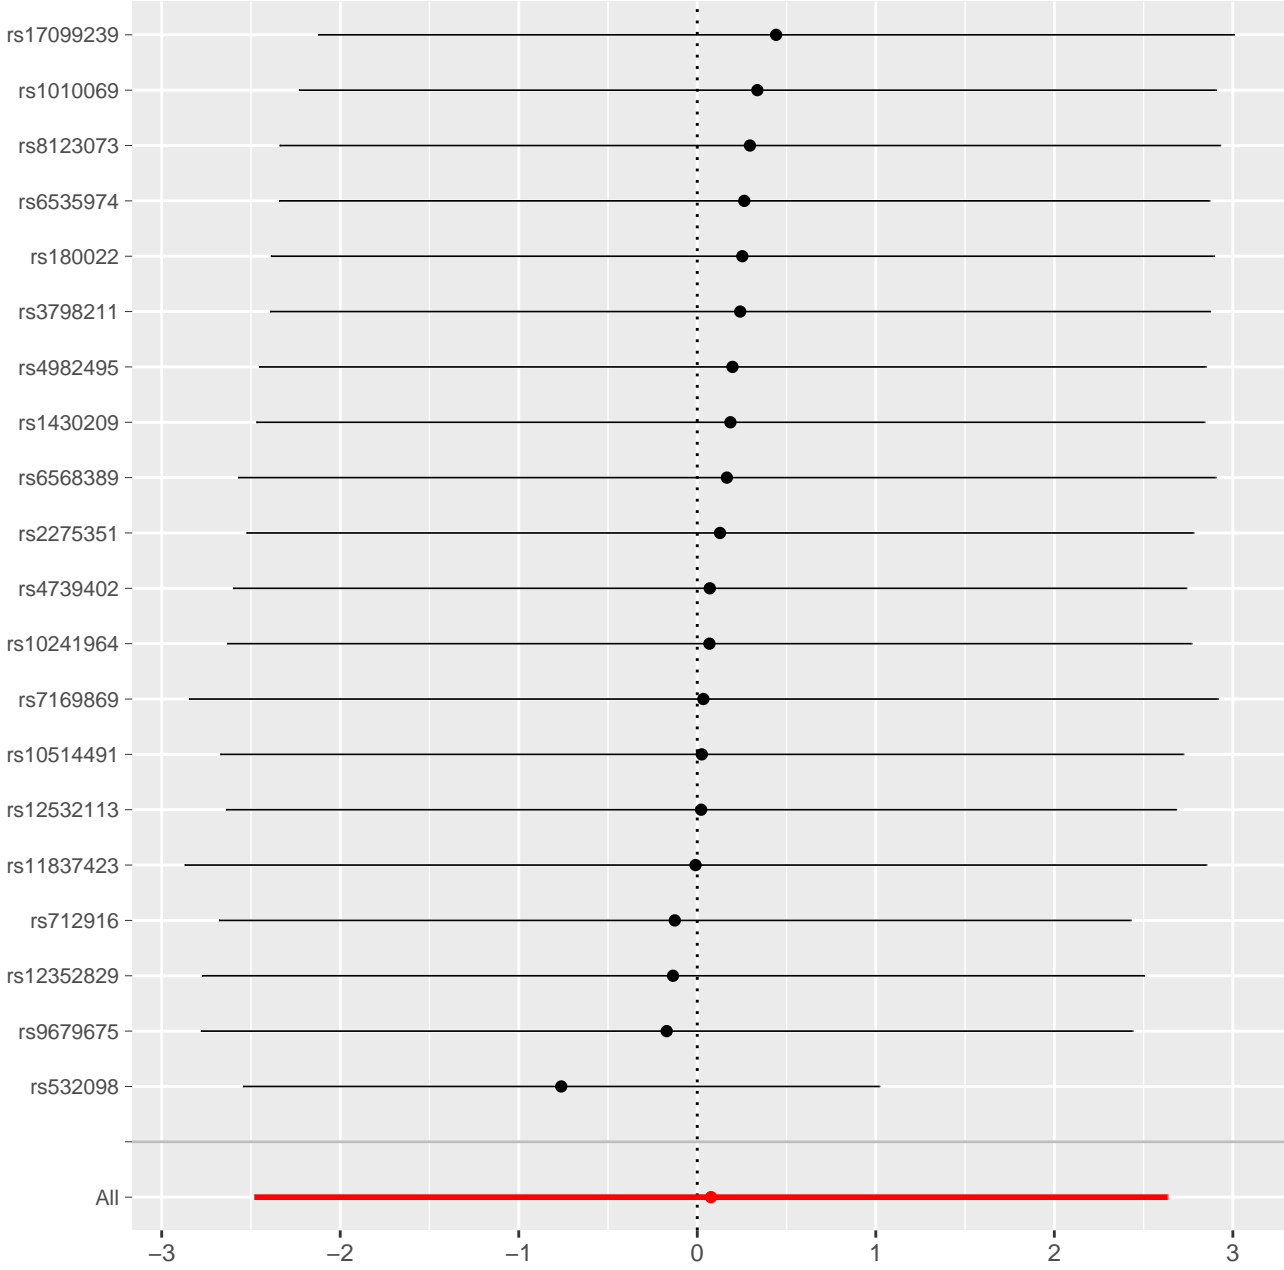

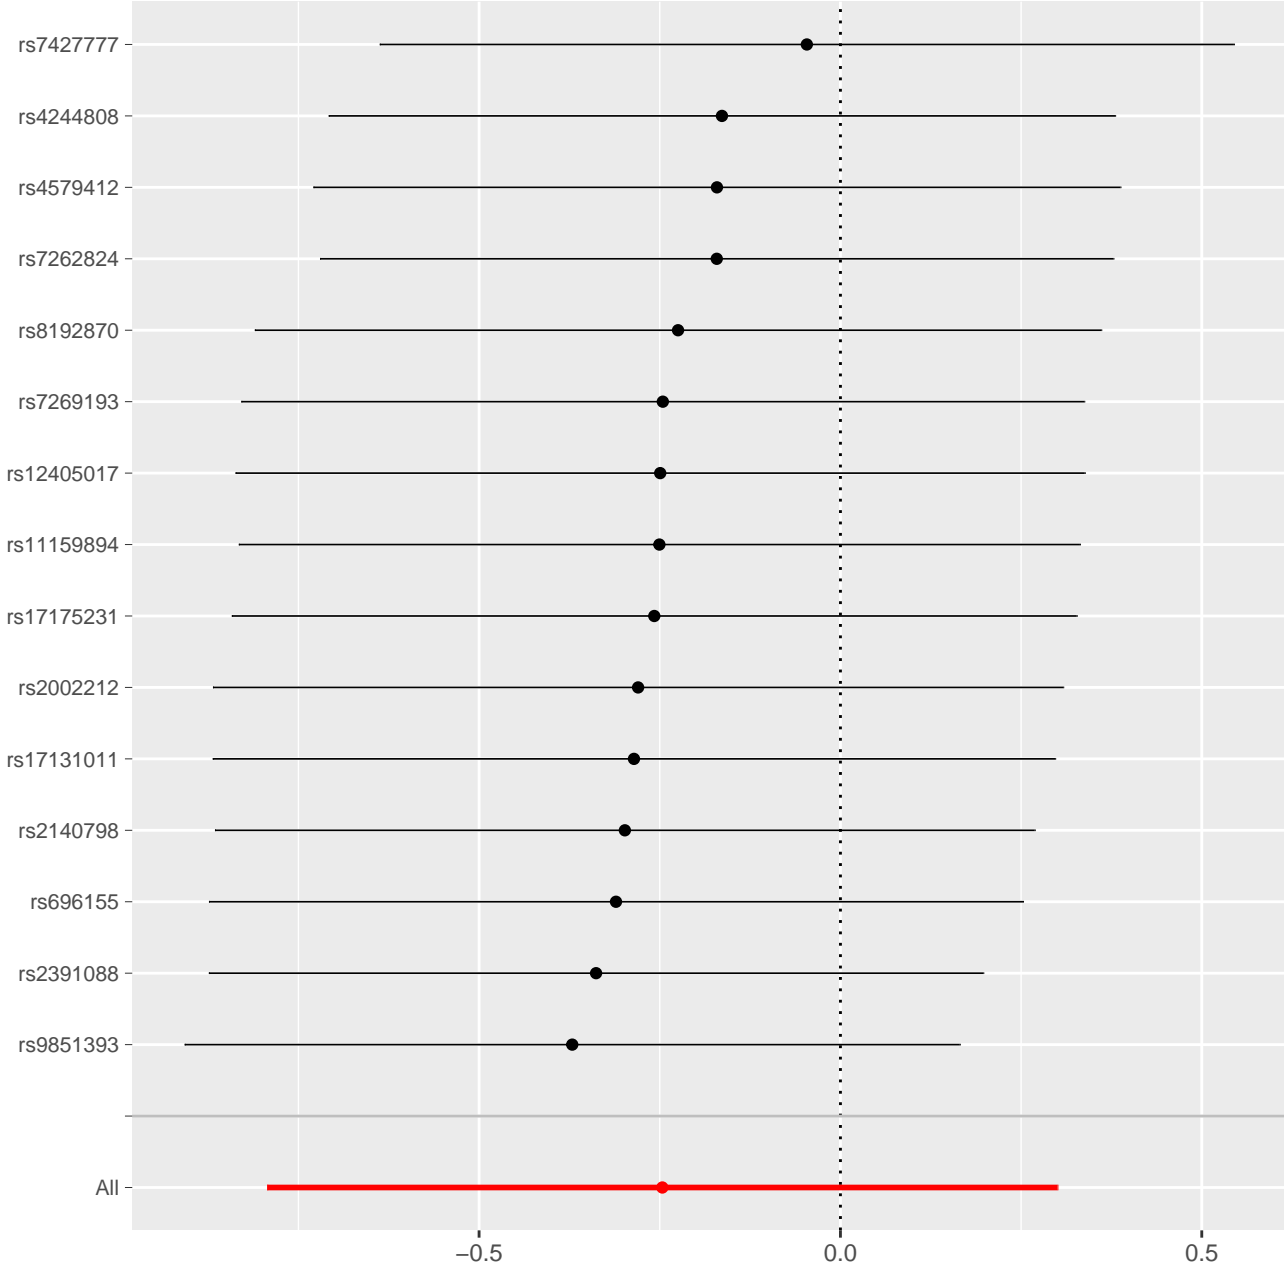

rs7583745

rs11940037

rs17351329

rs603424

rs11118120

rs1466228

All

-4

-2

0

MR leave-one-out sensitivity analysis for  
'M01121.metal.pos.txt.gz' on 'JUVEN\_ARTHR.gz'

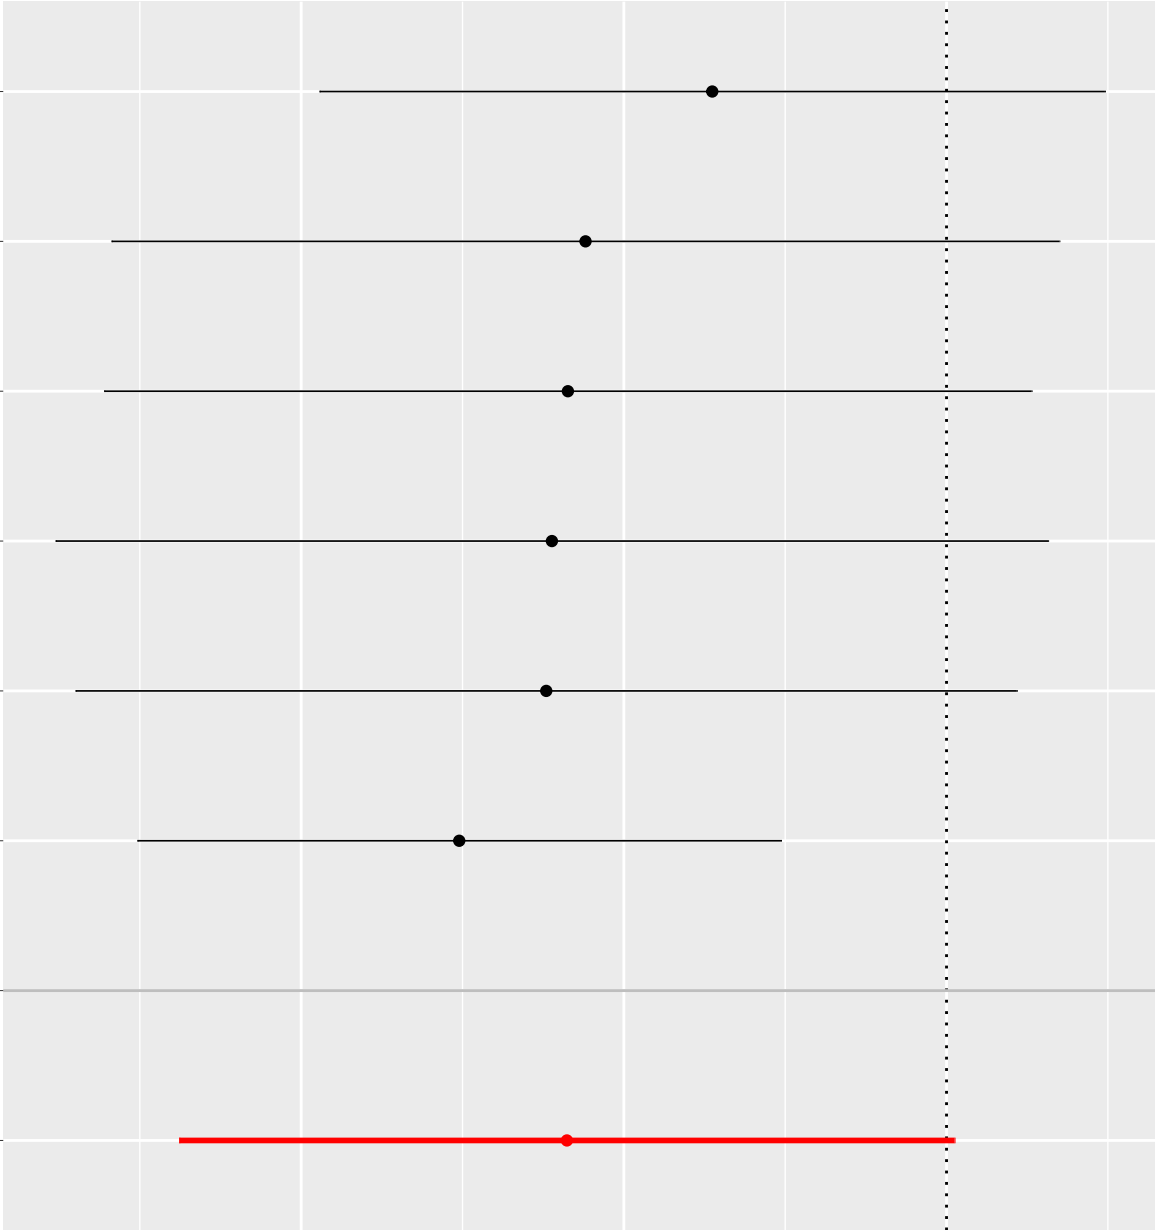

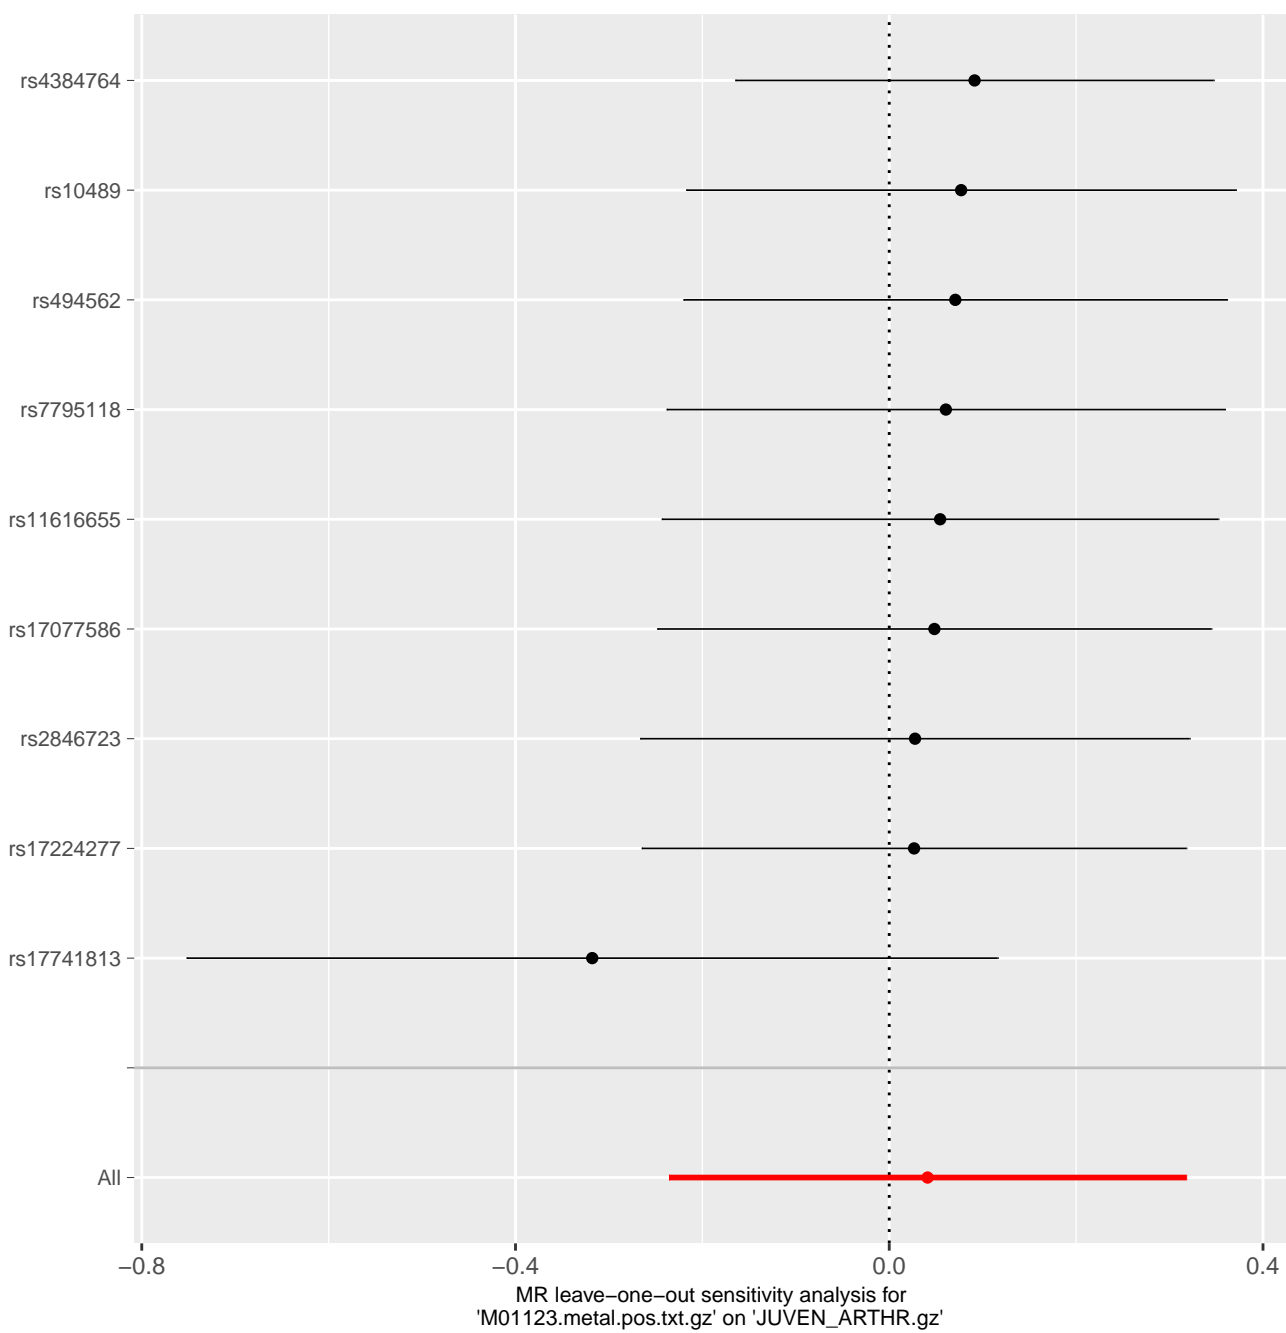

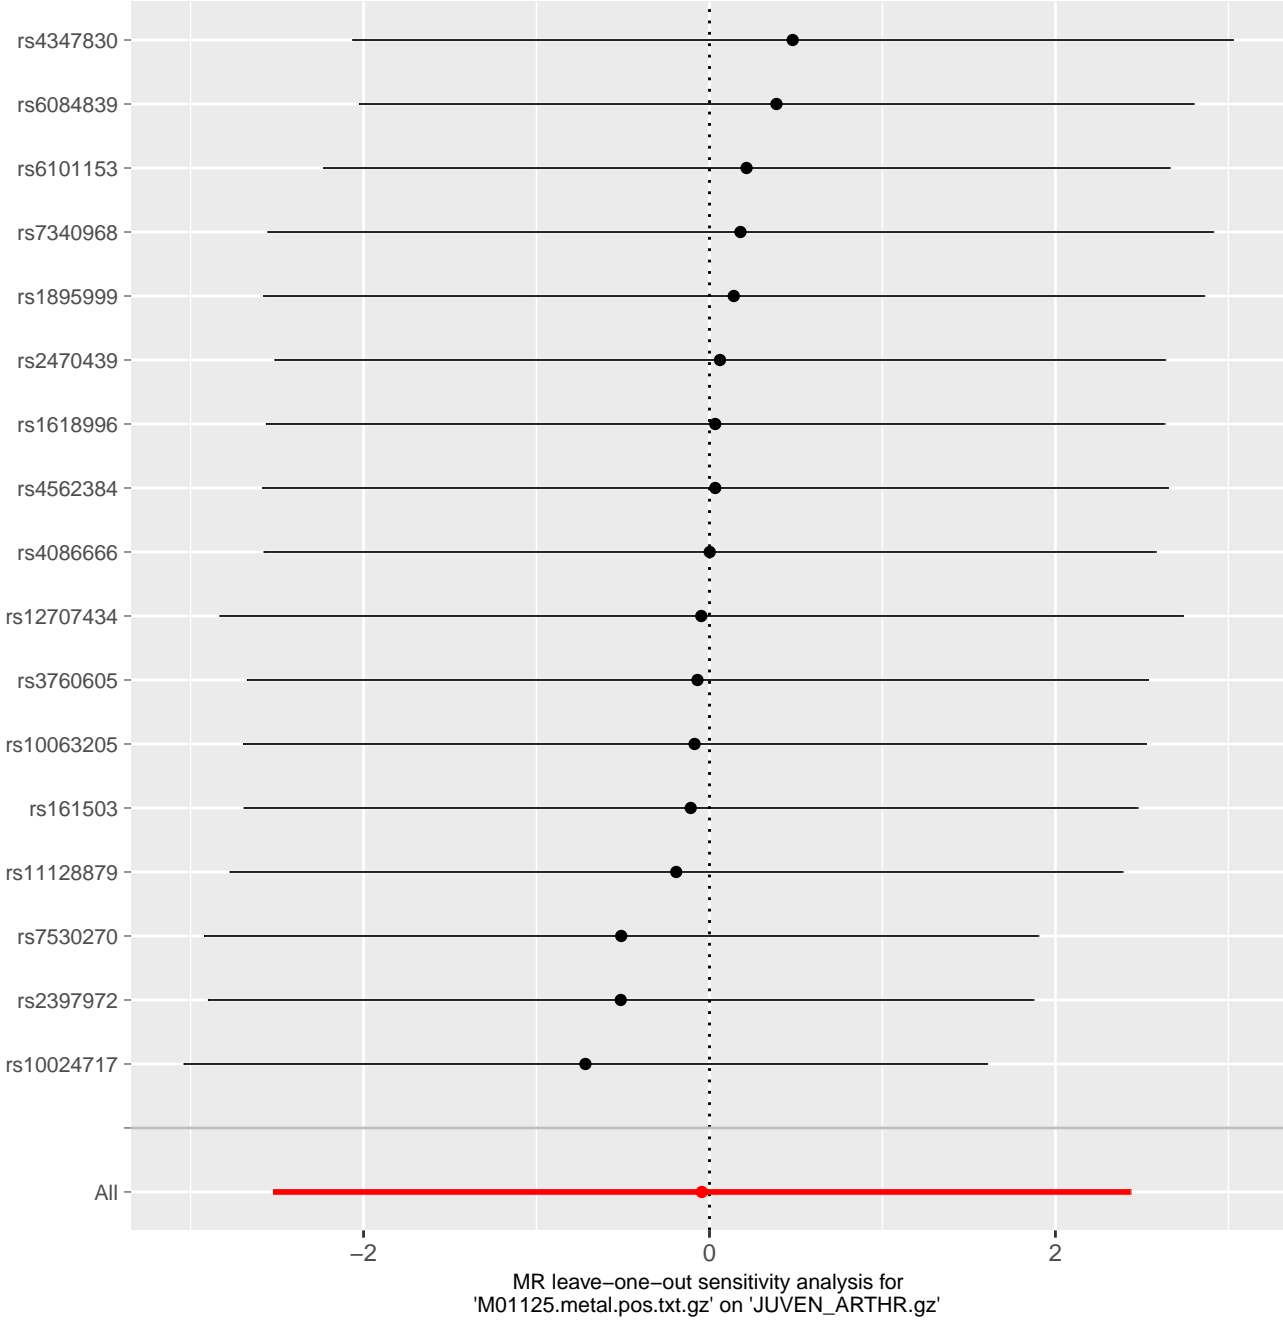

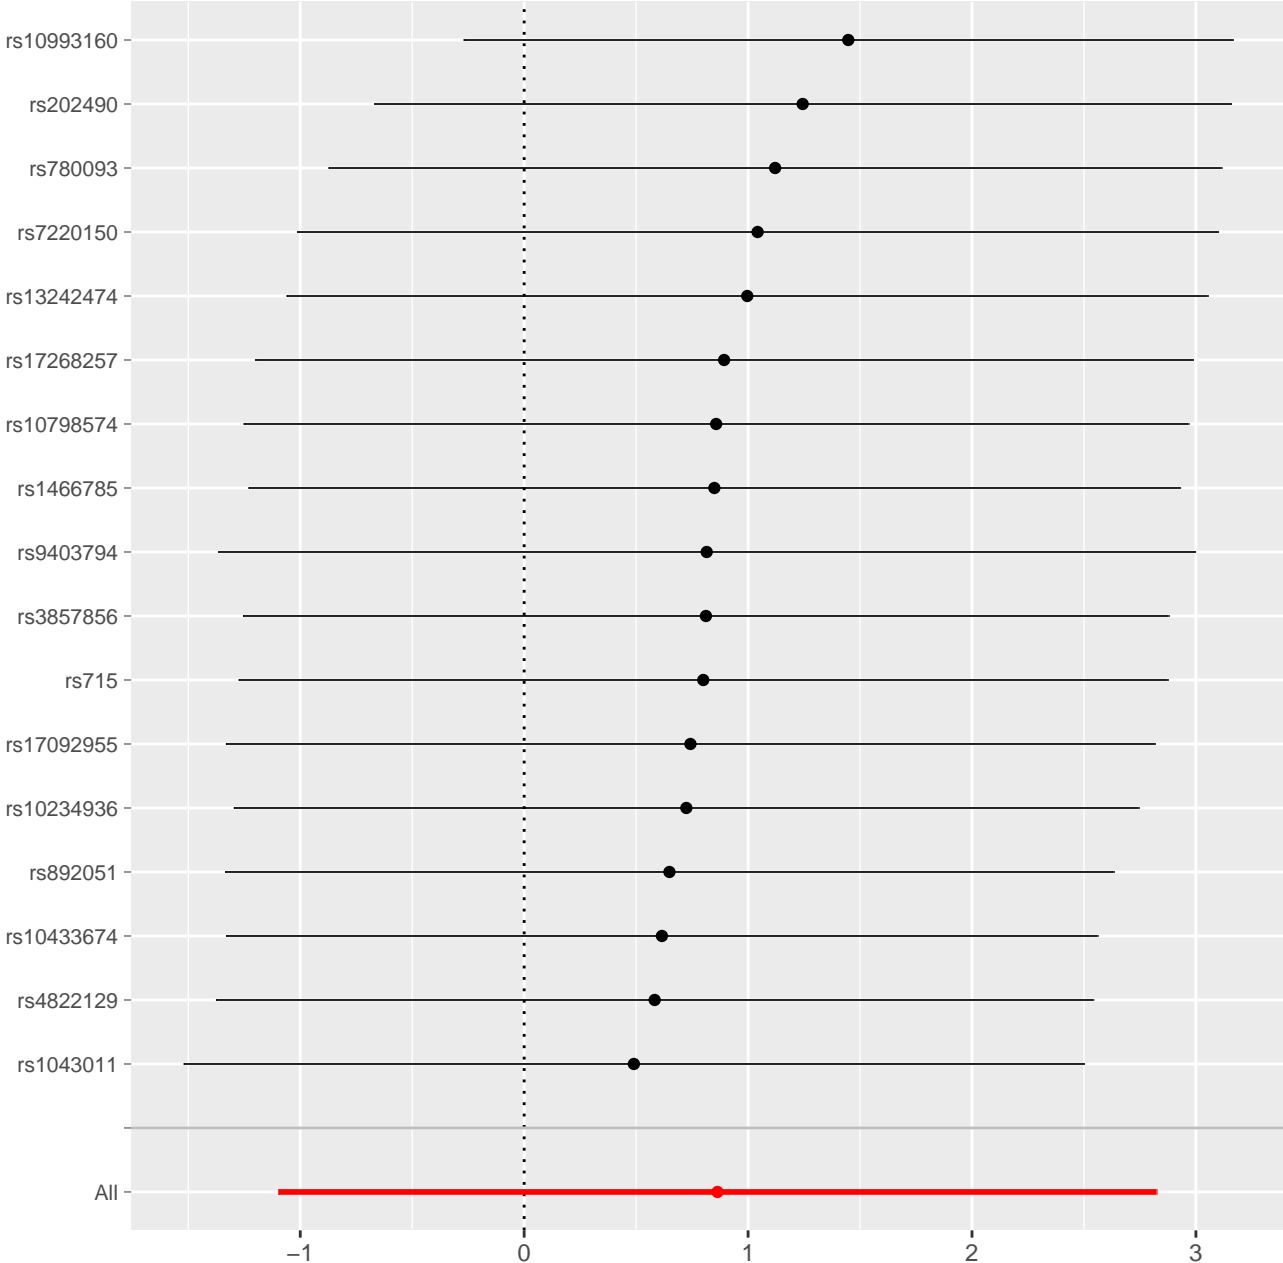

MR leave-one-out sensitivity analysis for 'M01284.metal.pos.txt.gz' on 'JUVEN\_ARTHR.gz'



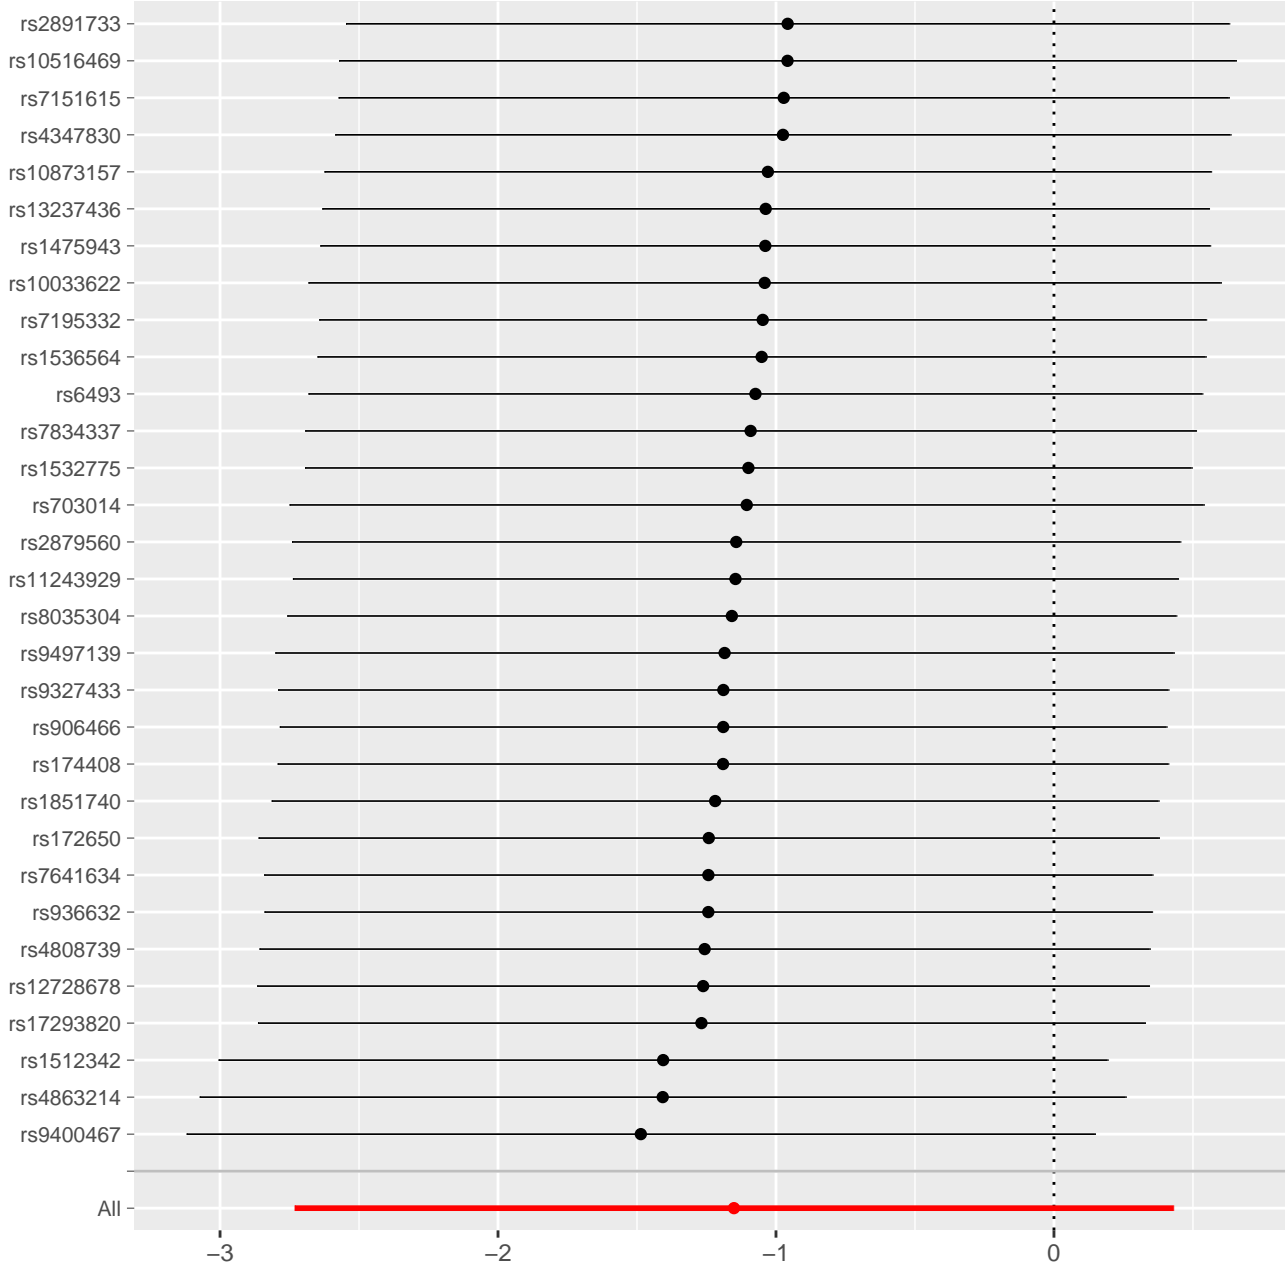

MR leave-one-out sensitivity analysis for 'M01299.metal.pos.txt.gz' on 'JUVEN\_ARTHR.gz'

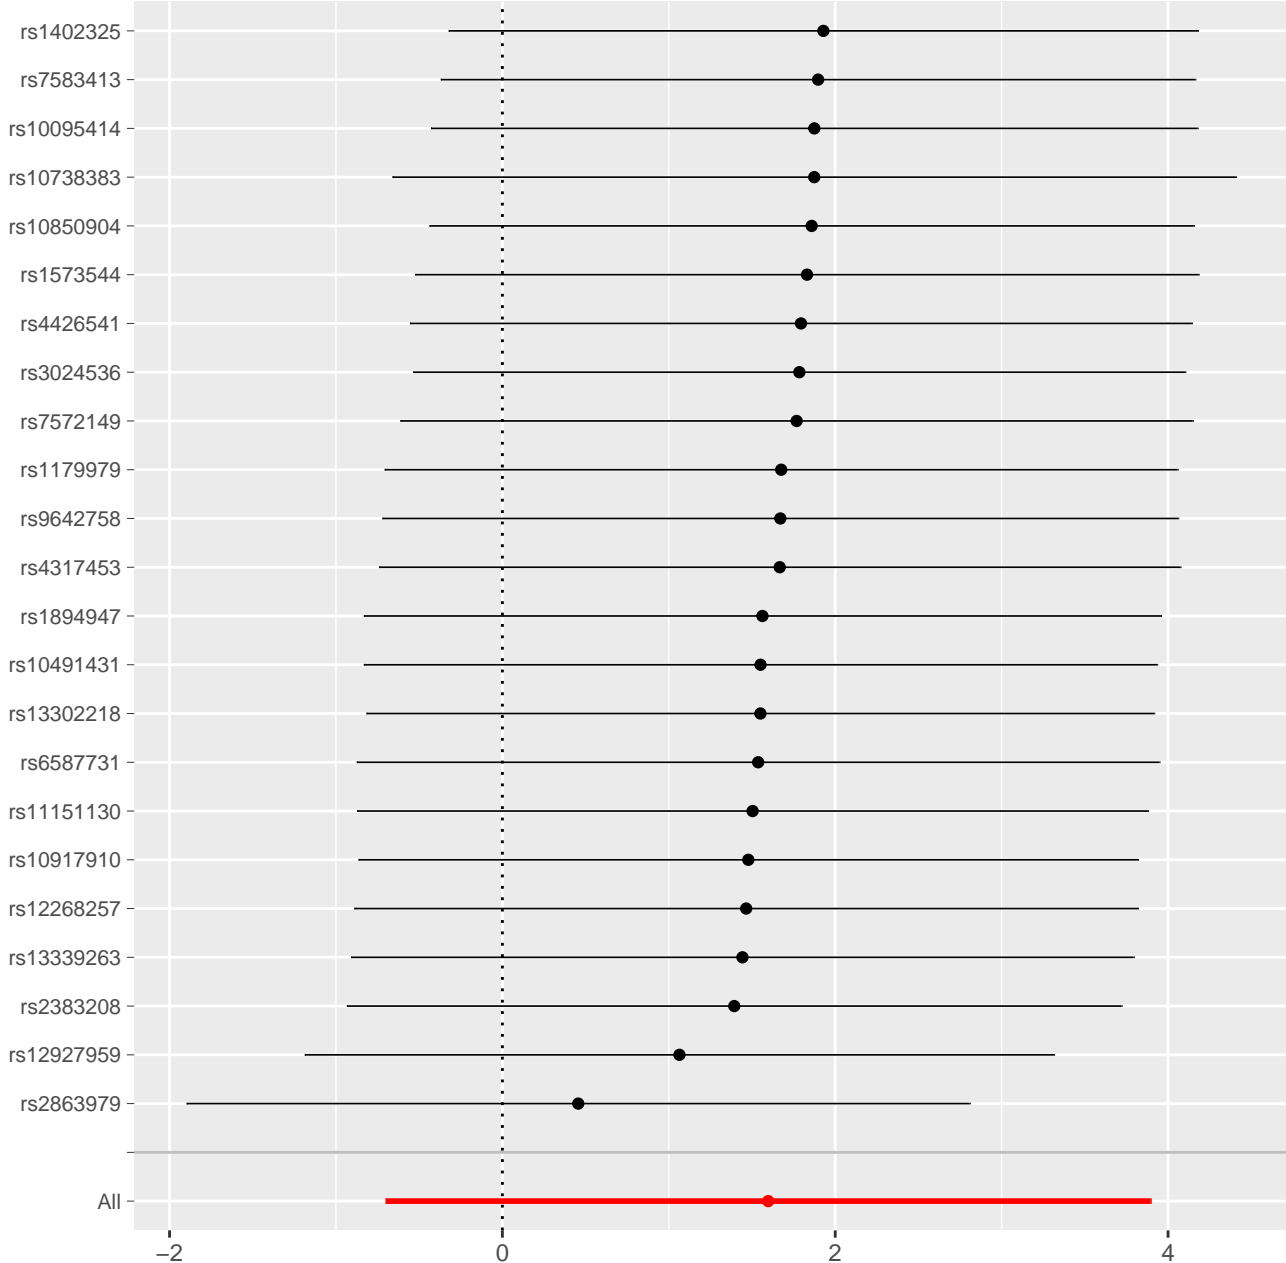

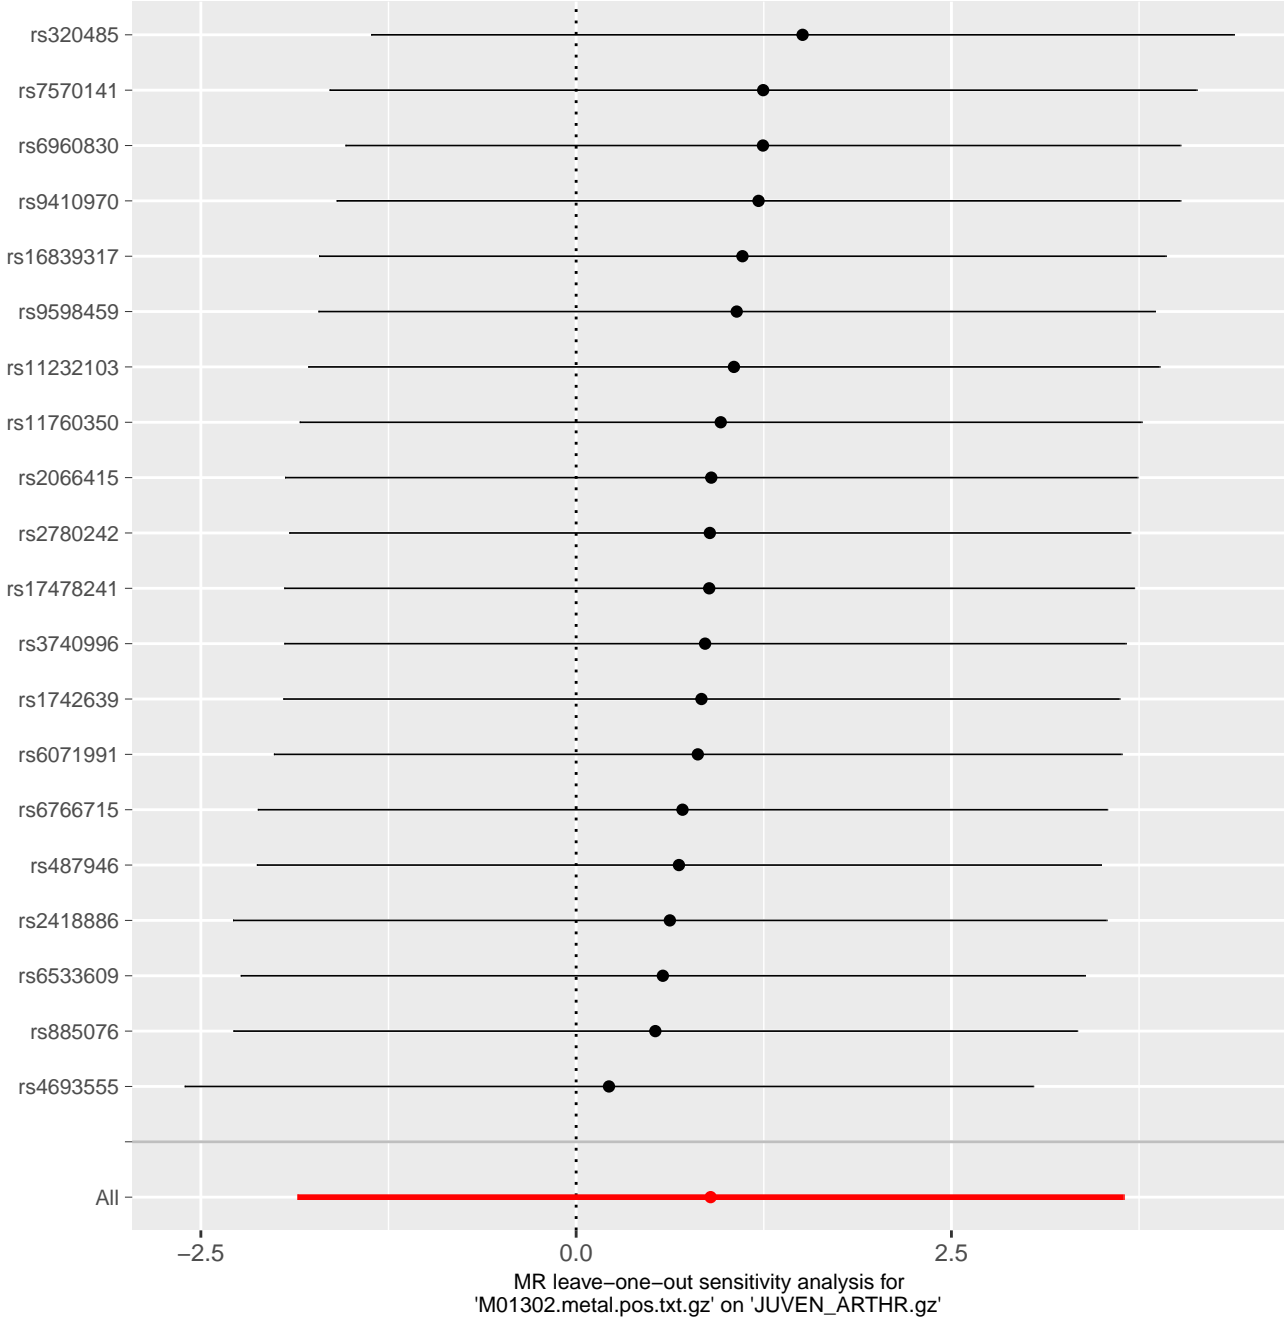

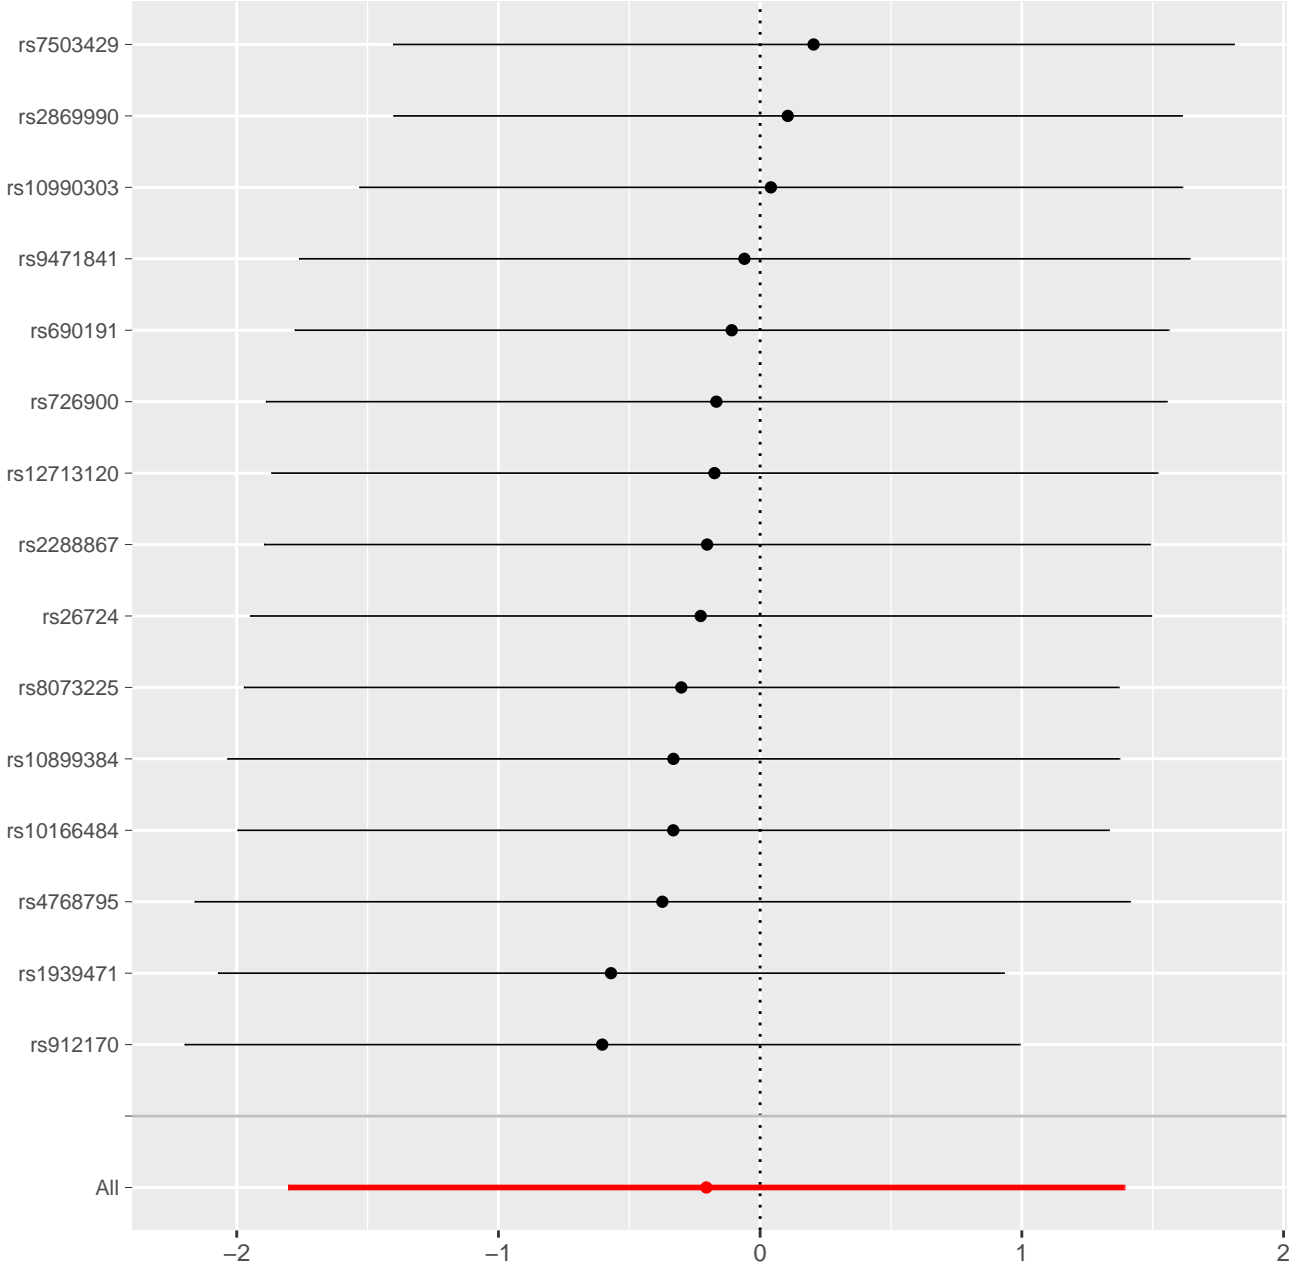

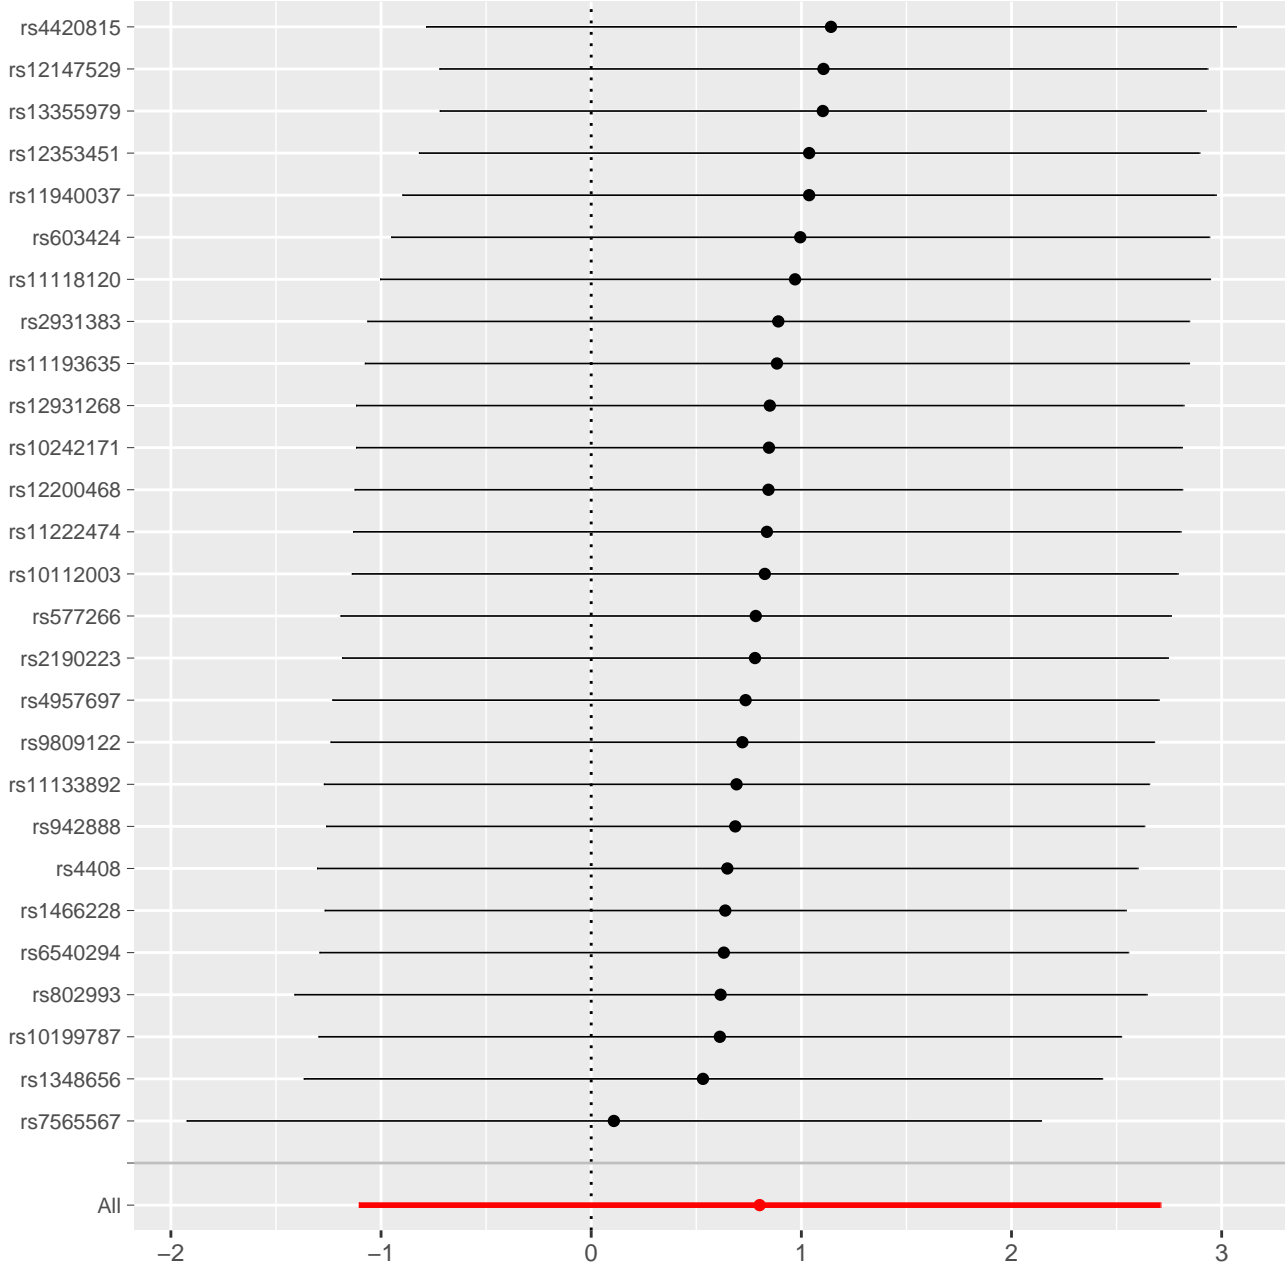

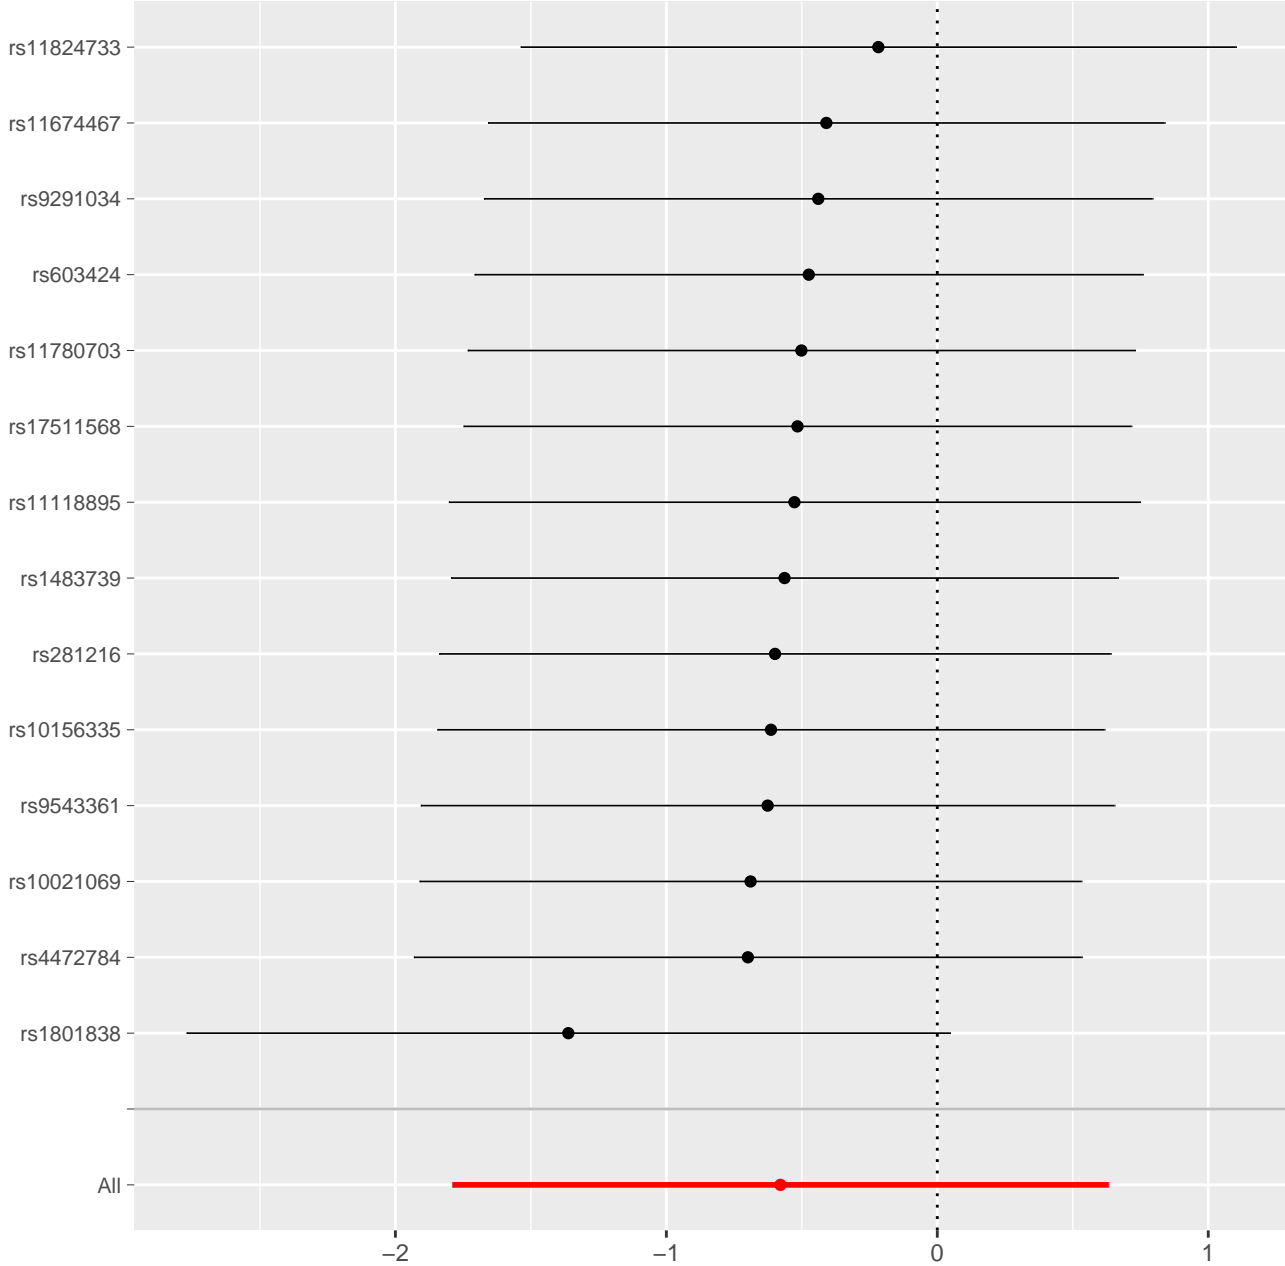

MR leave-one-out sensitivity analysis for 'M01356.metal.pos.txt.gz' on 'JUVEN\_ARTHR.gz'

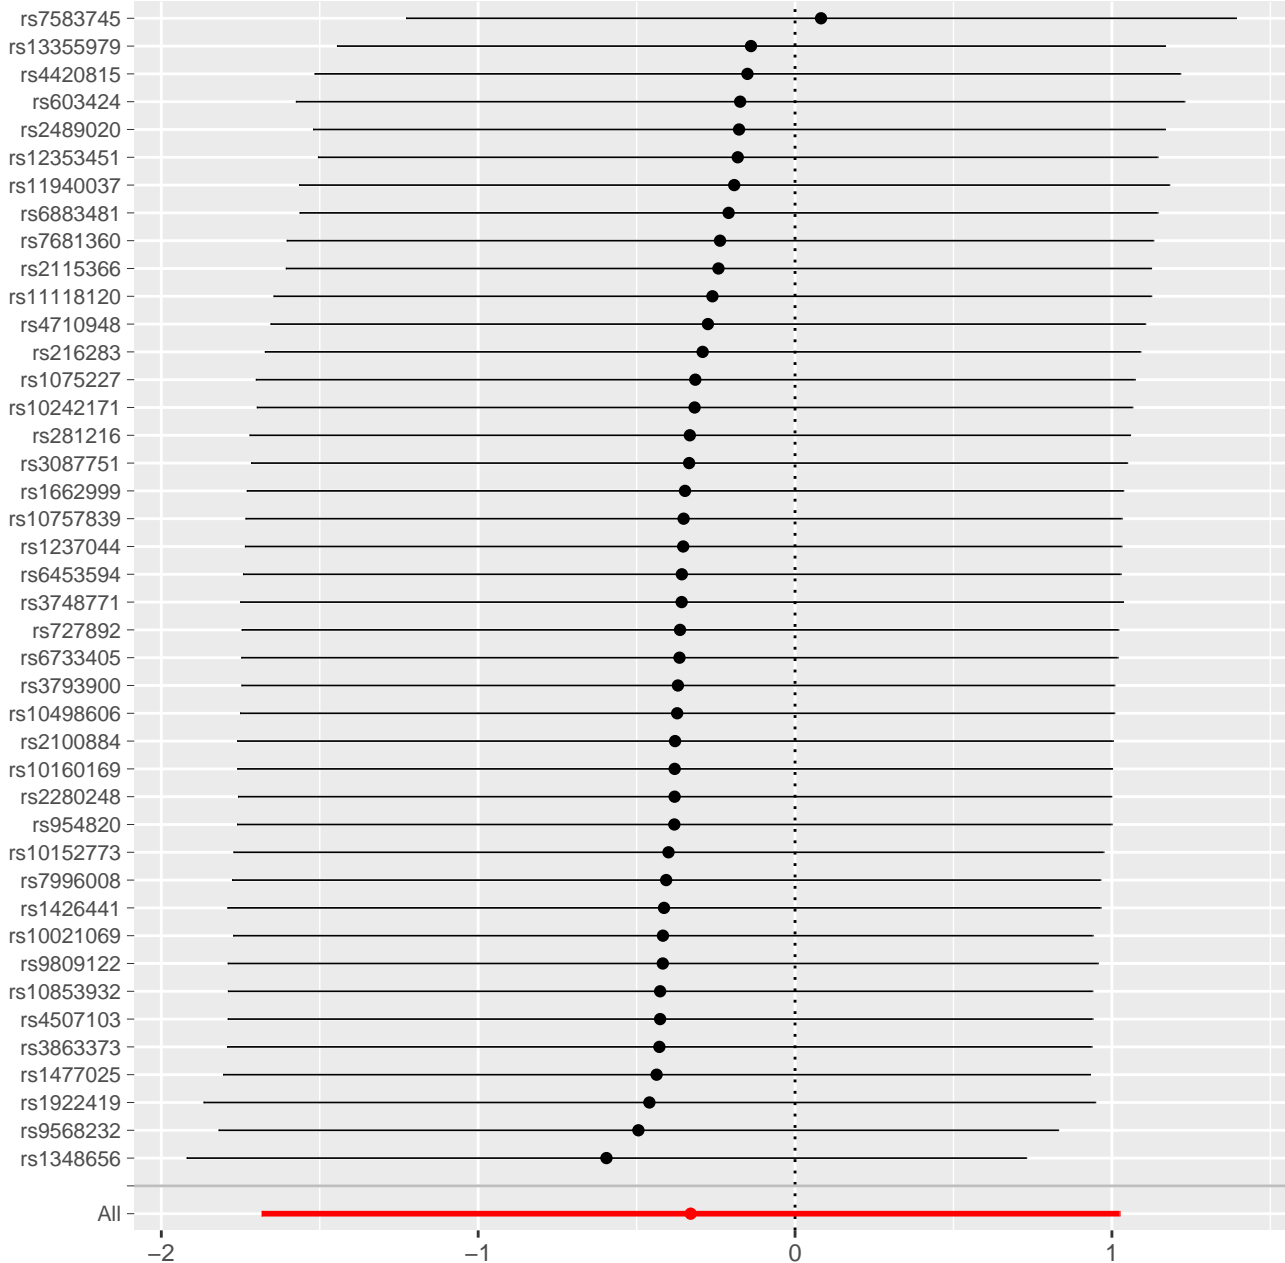

MR leave-one-out sensitivity analysis for 'M01358.metal.pos.txt.gz' on 'JUVEN\_ARTHR.gz'

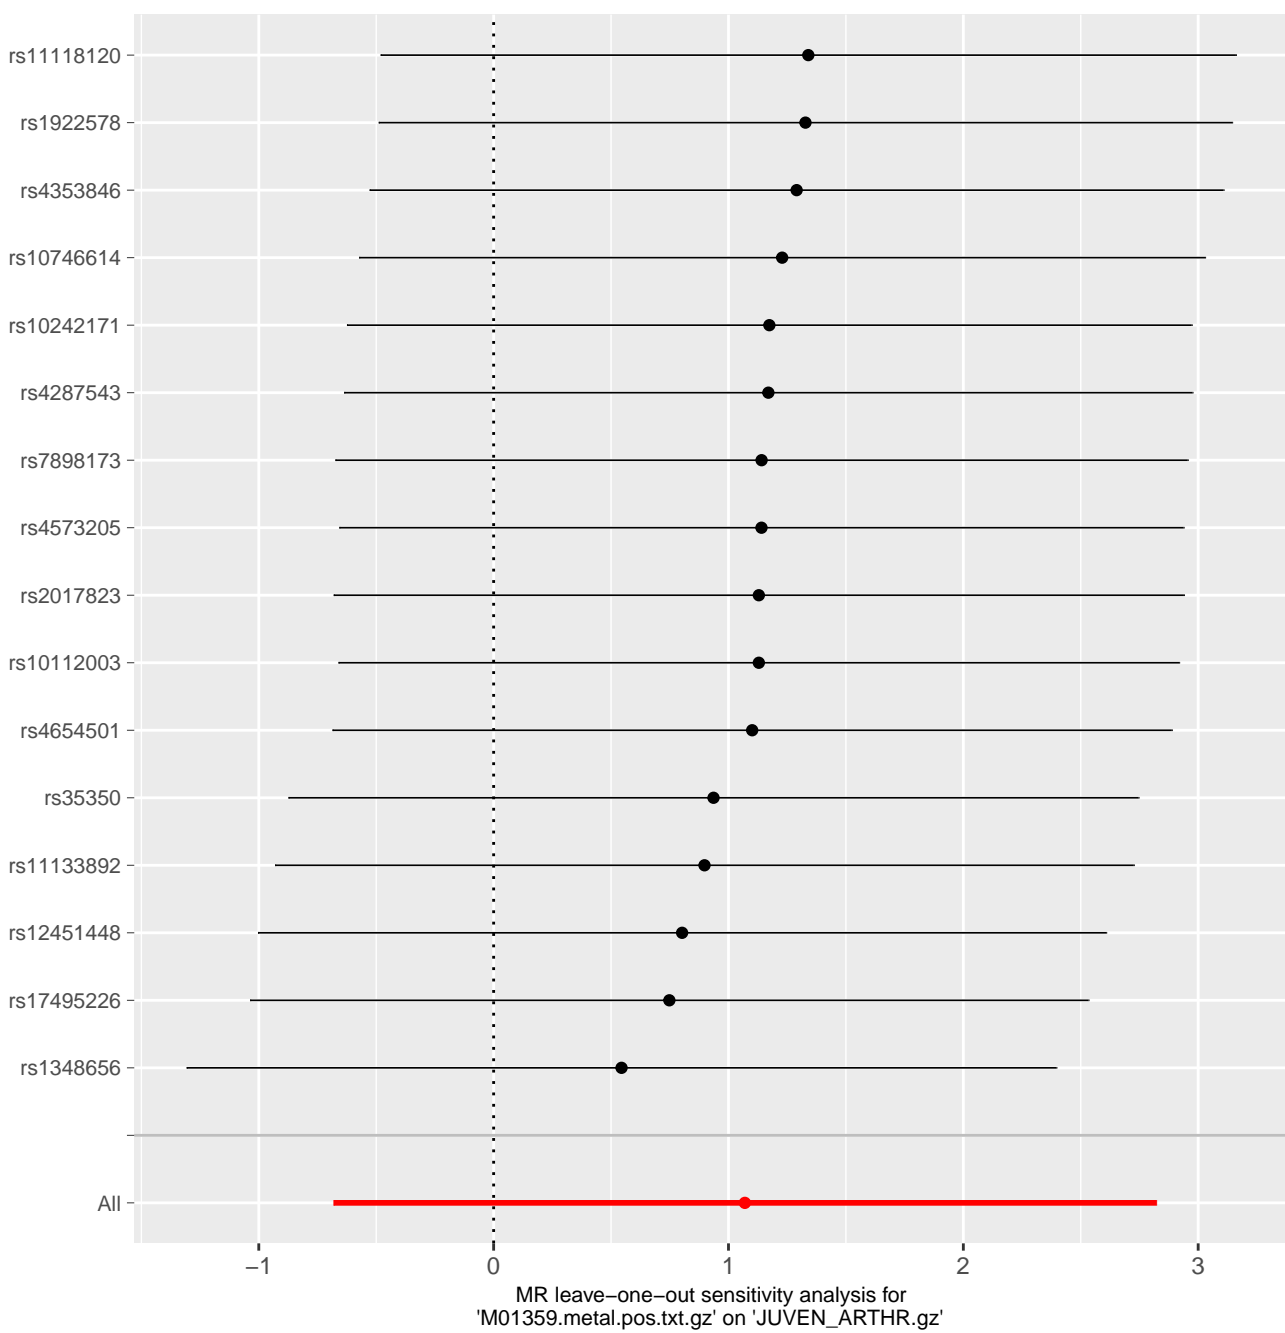



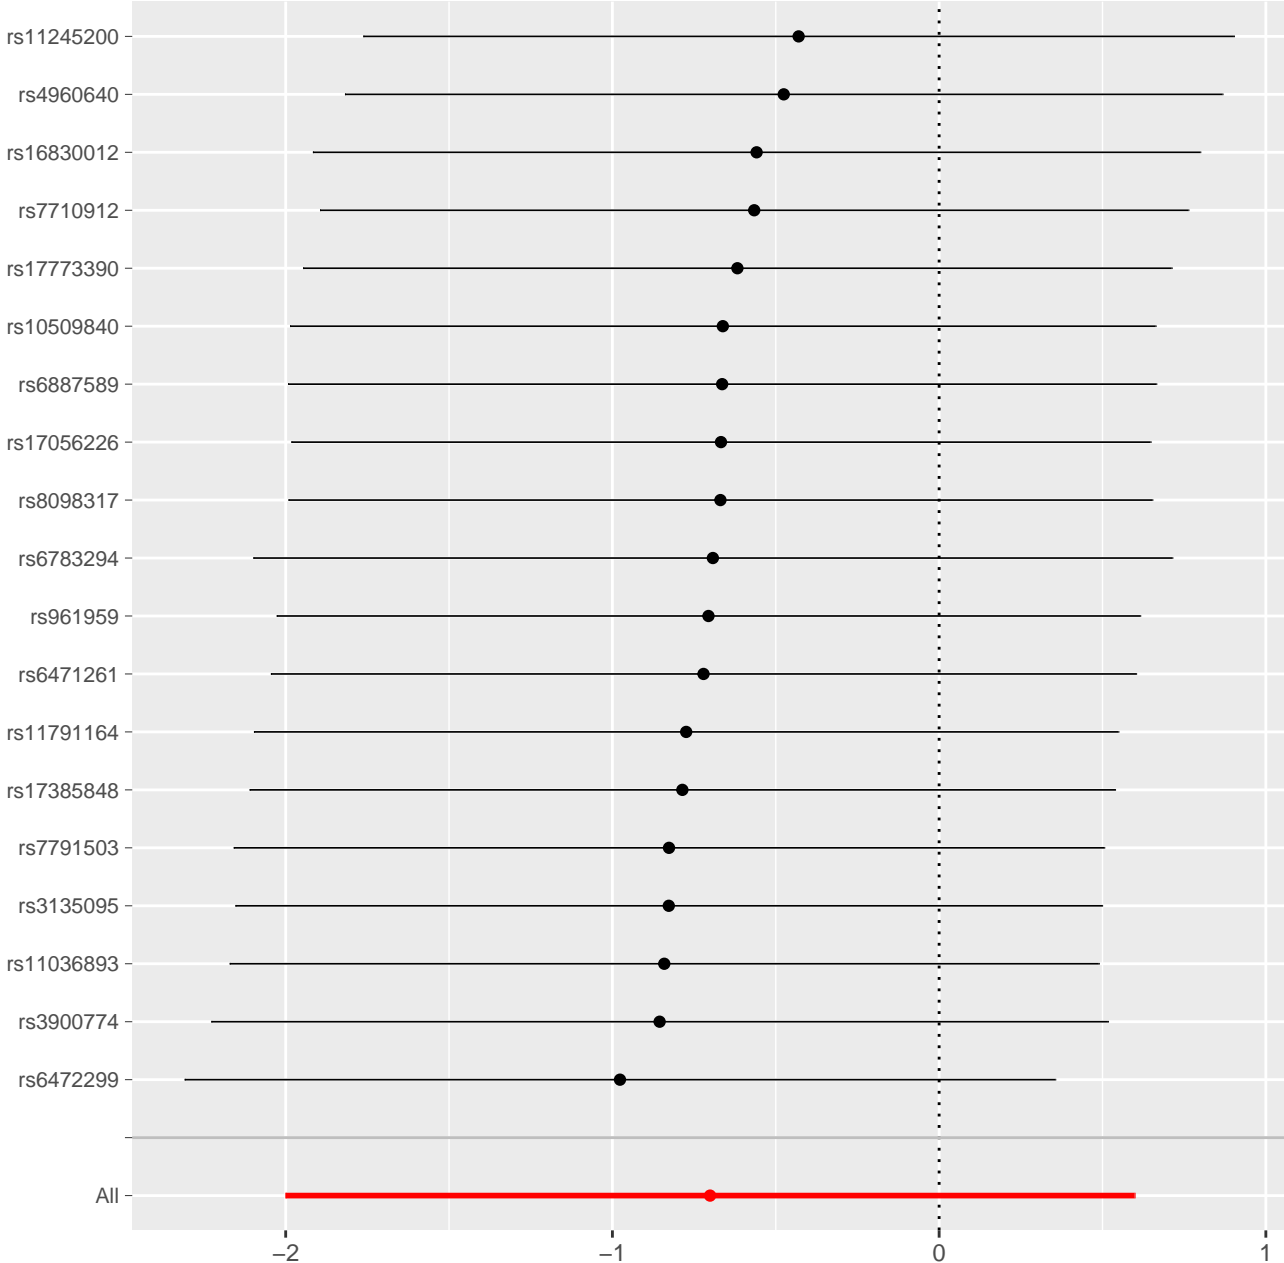

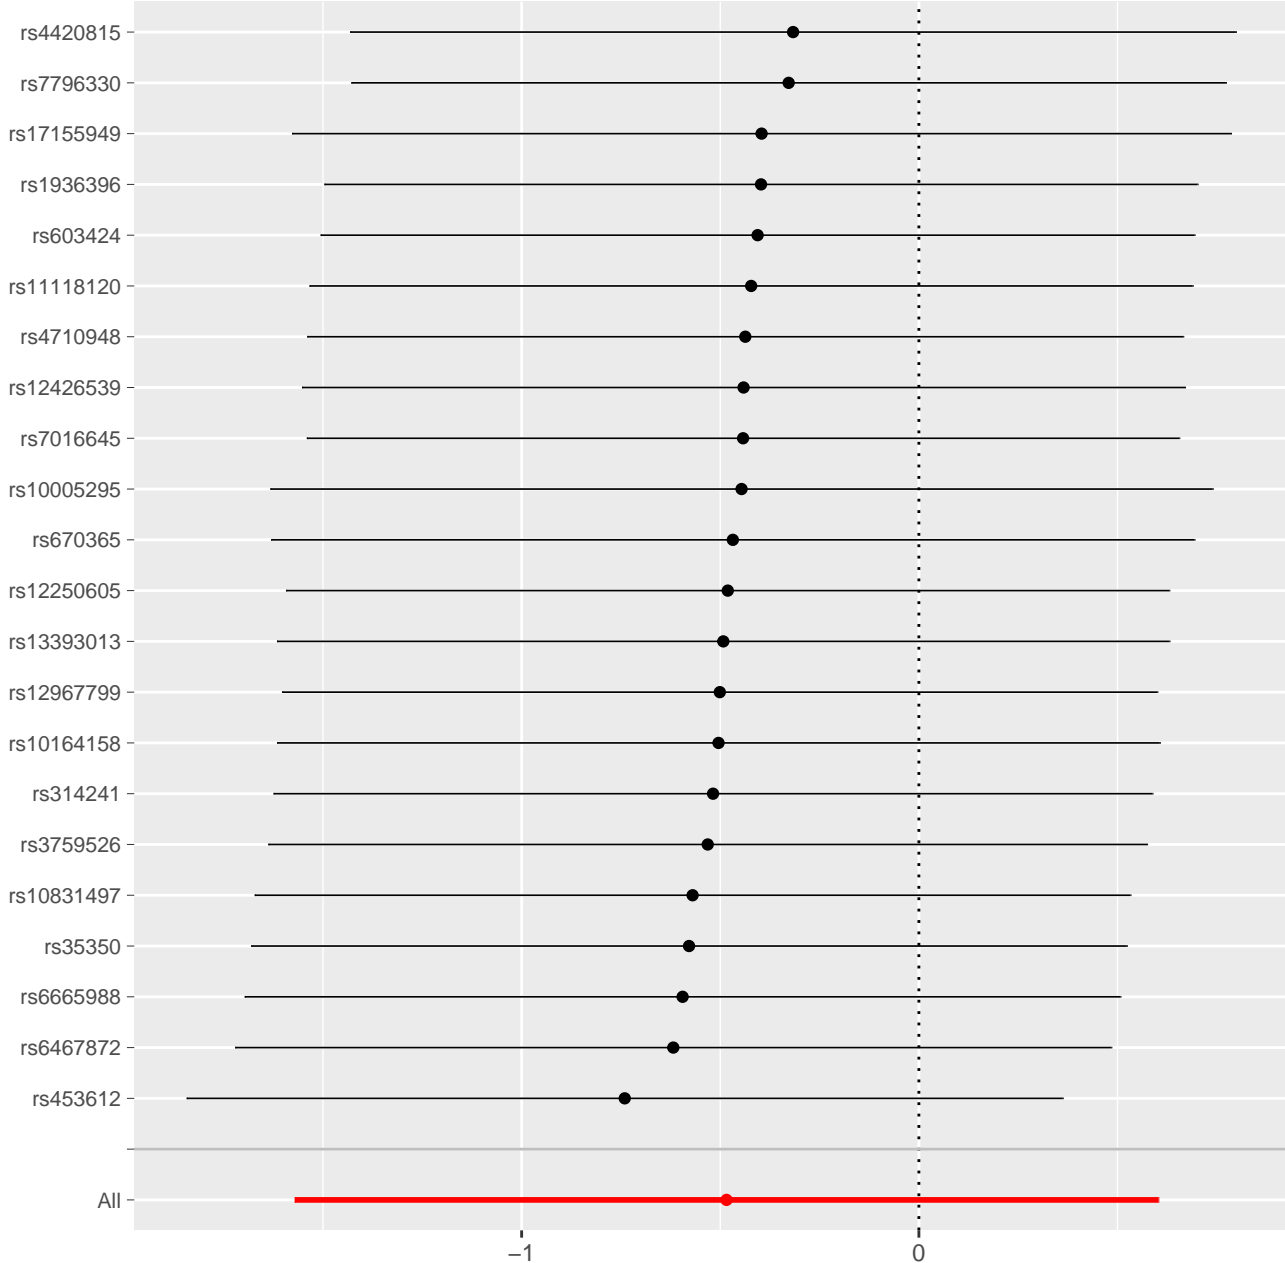

MR leave-one-out sensitivity analysis for 'M01365.metal.pos.txt.gz' on 'JUVEN\_ARTHR.gz'

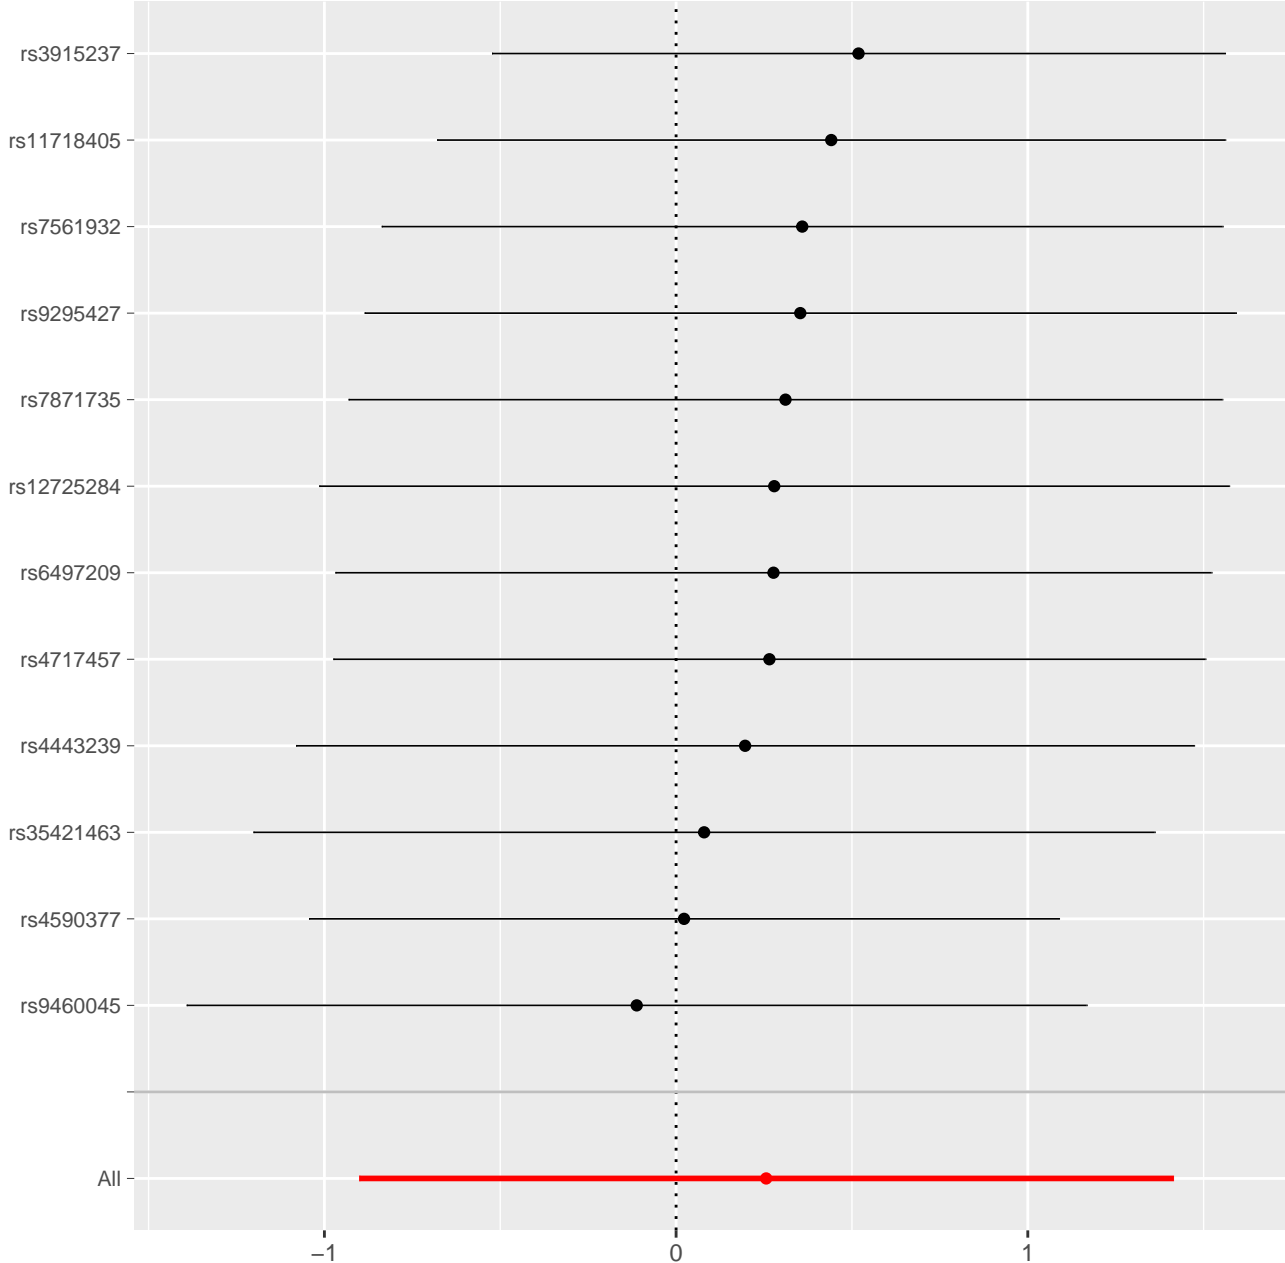

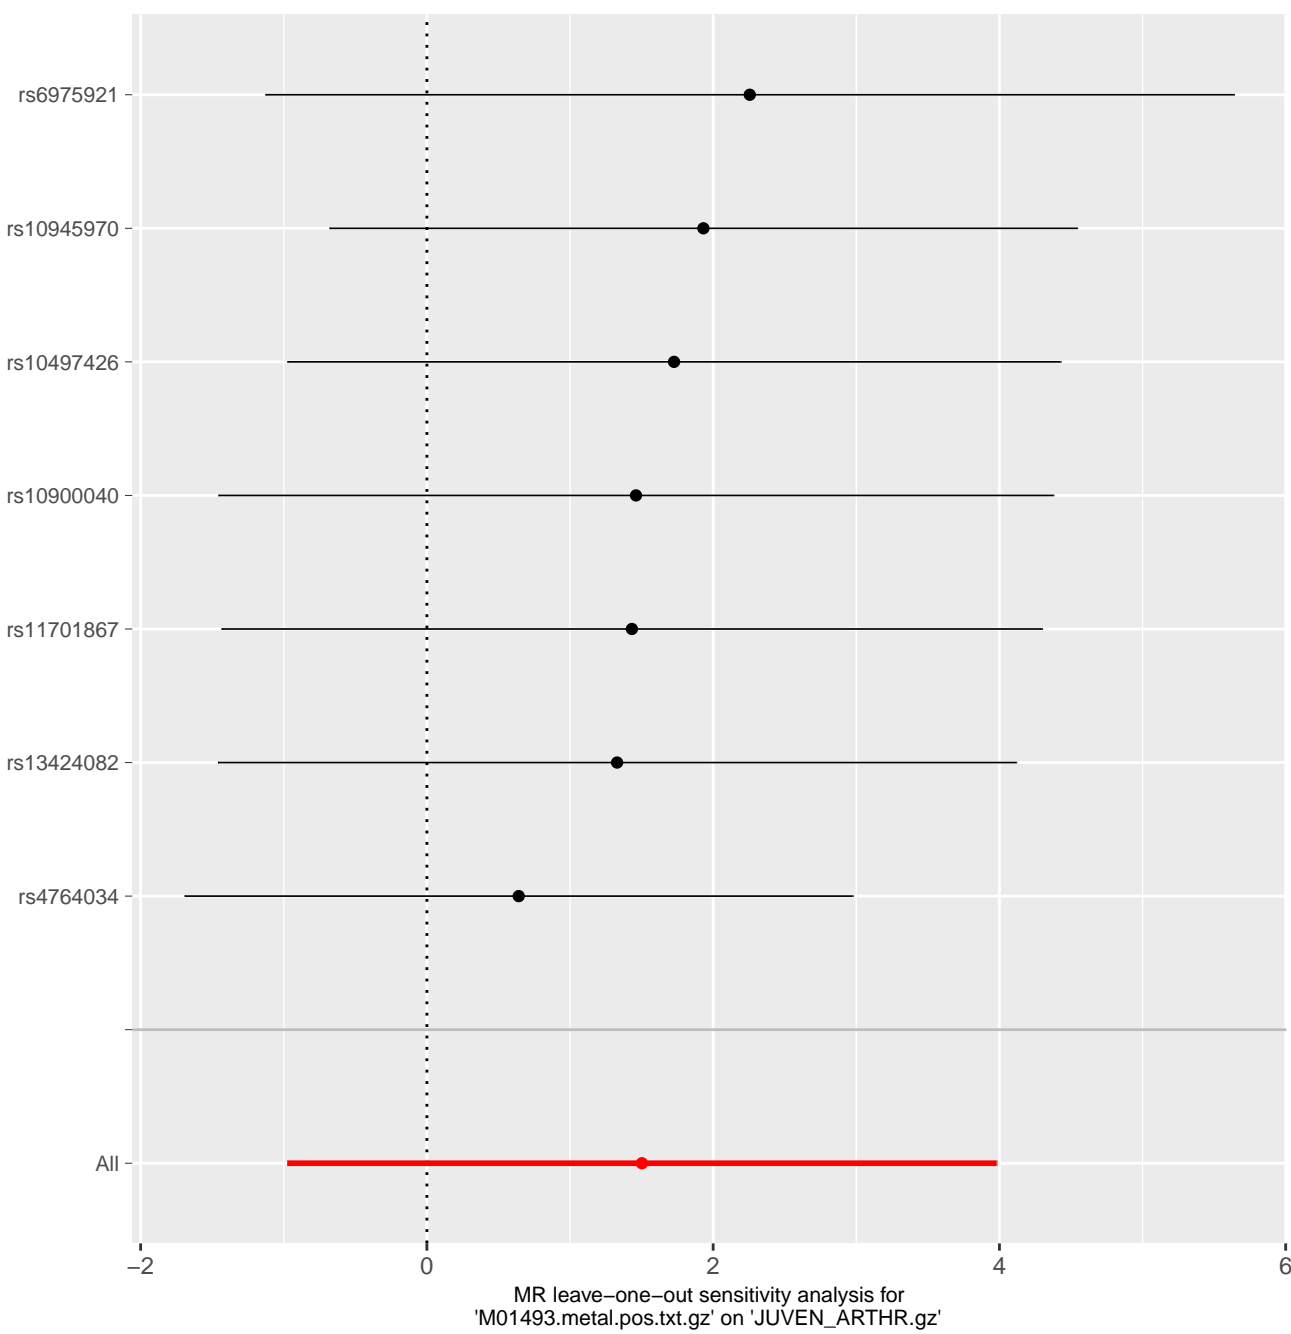

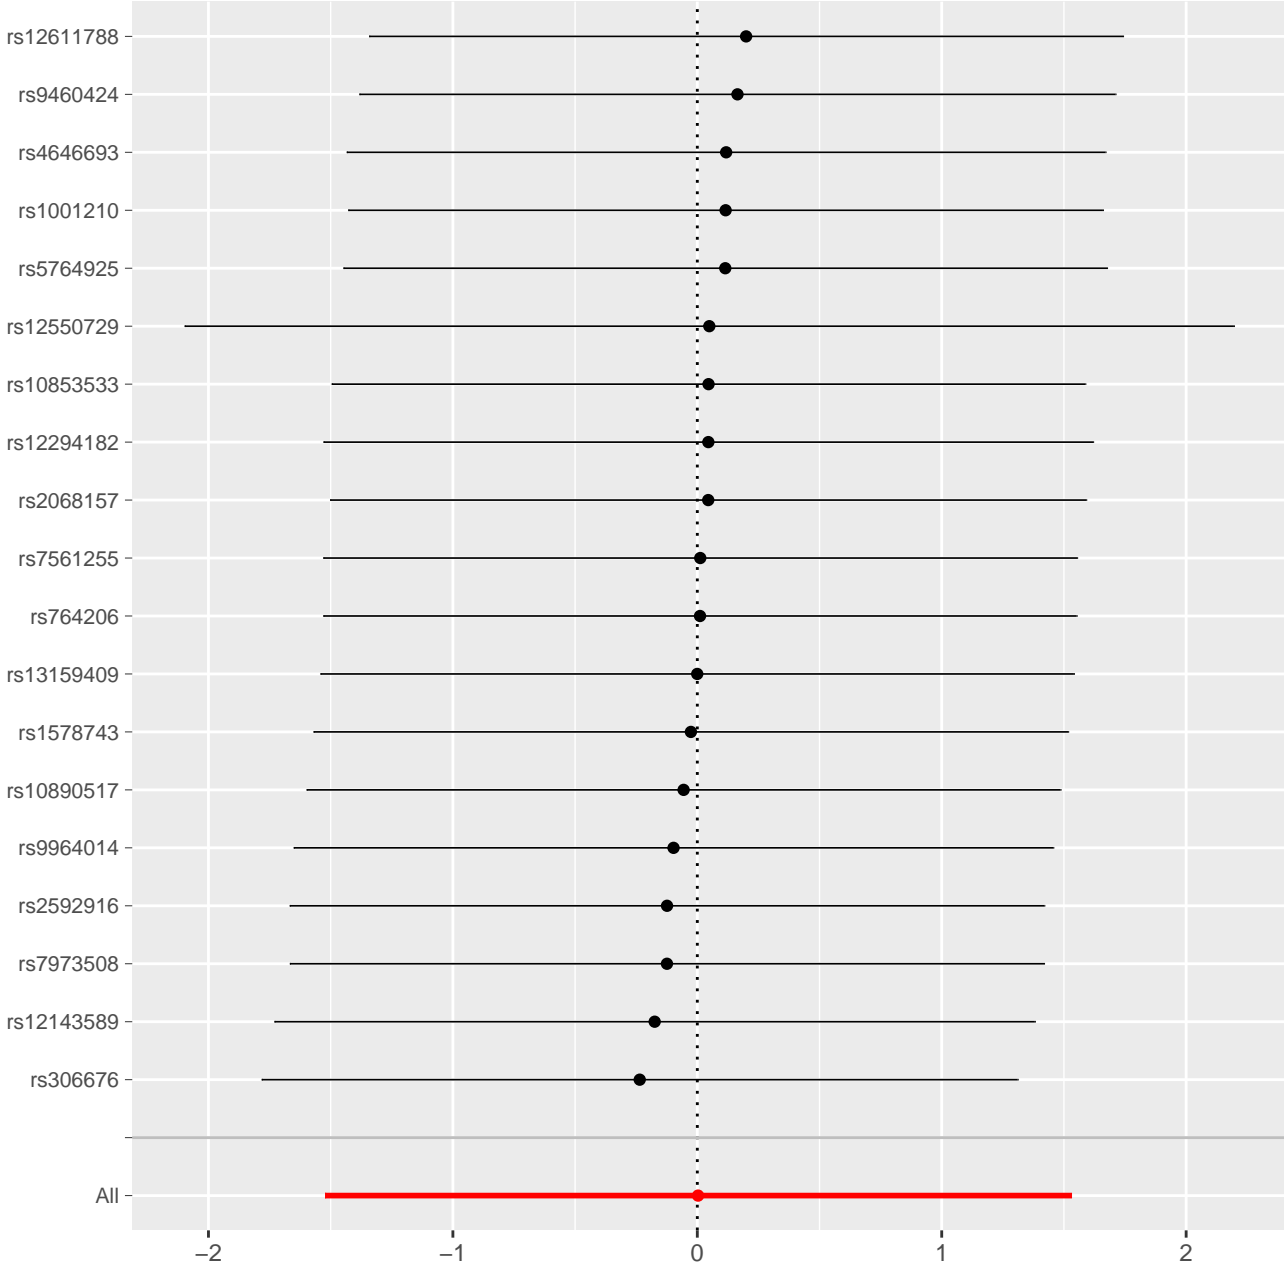

MR leave-one-out sensitivity analysis for 'M01494.metal.pos.txt.gz' on 'JUVEN\_ARTHR.gz'

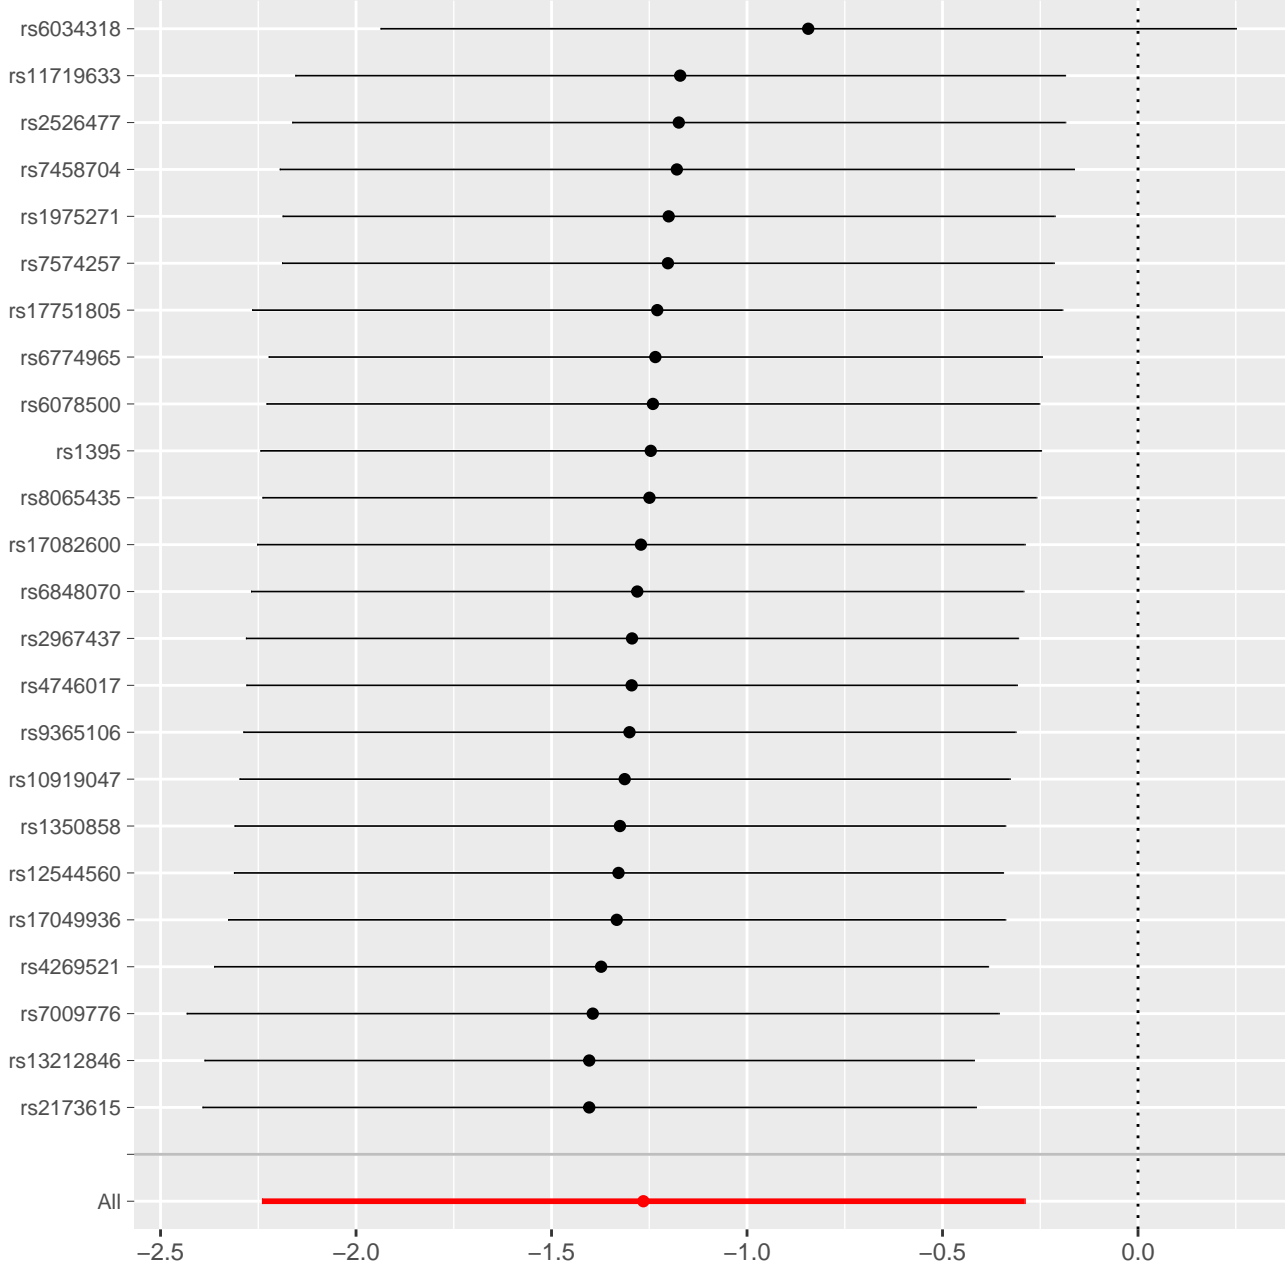

MR leave-one-out sensitivity analysis for 'M01508.metal.pos.txt.gz' on 'JUVEN\_ARTHR.gz'

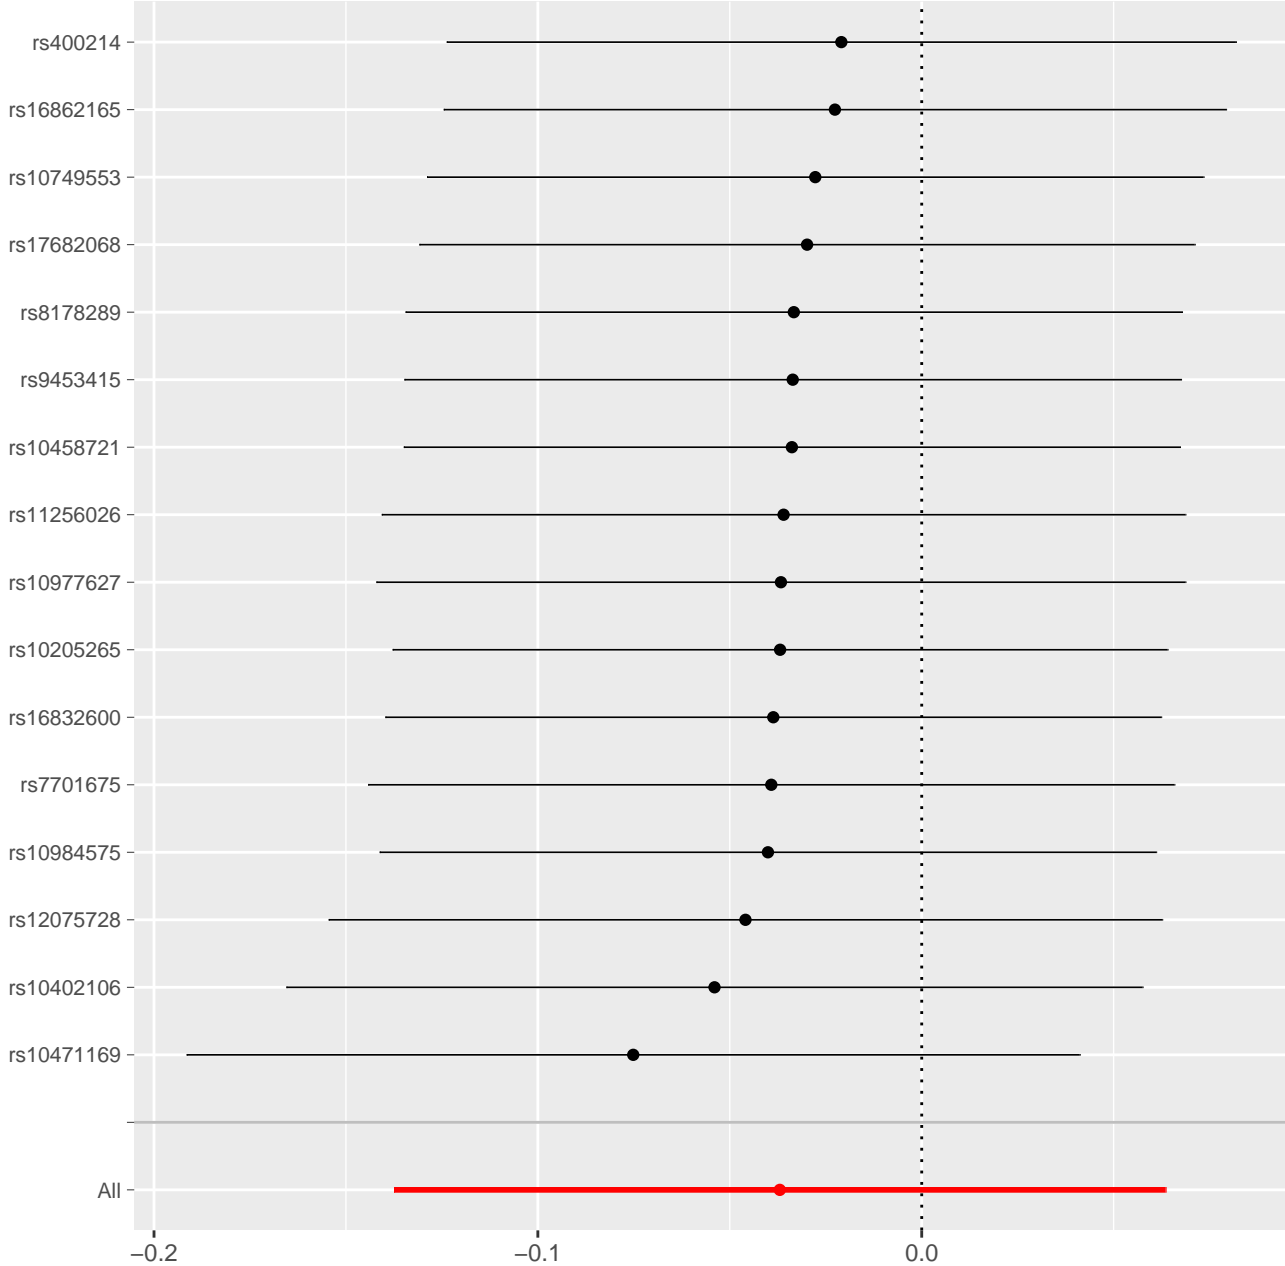

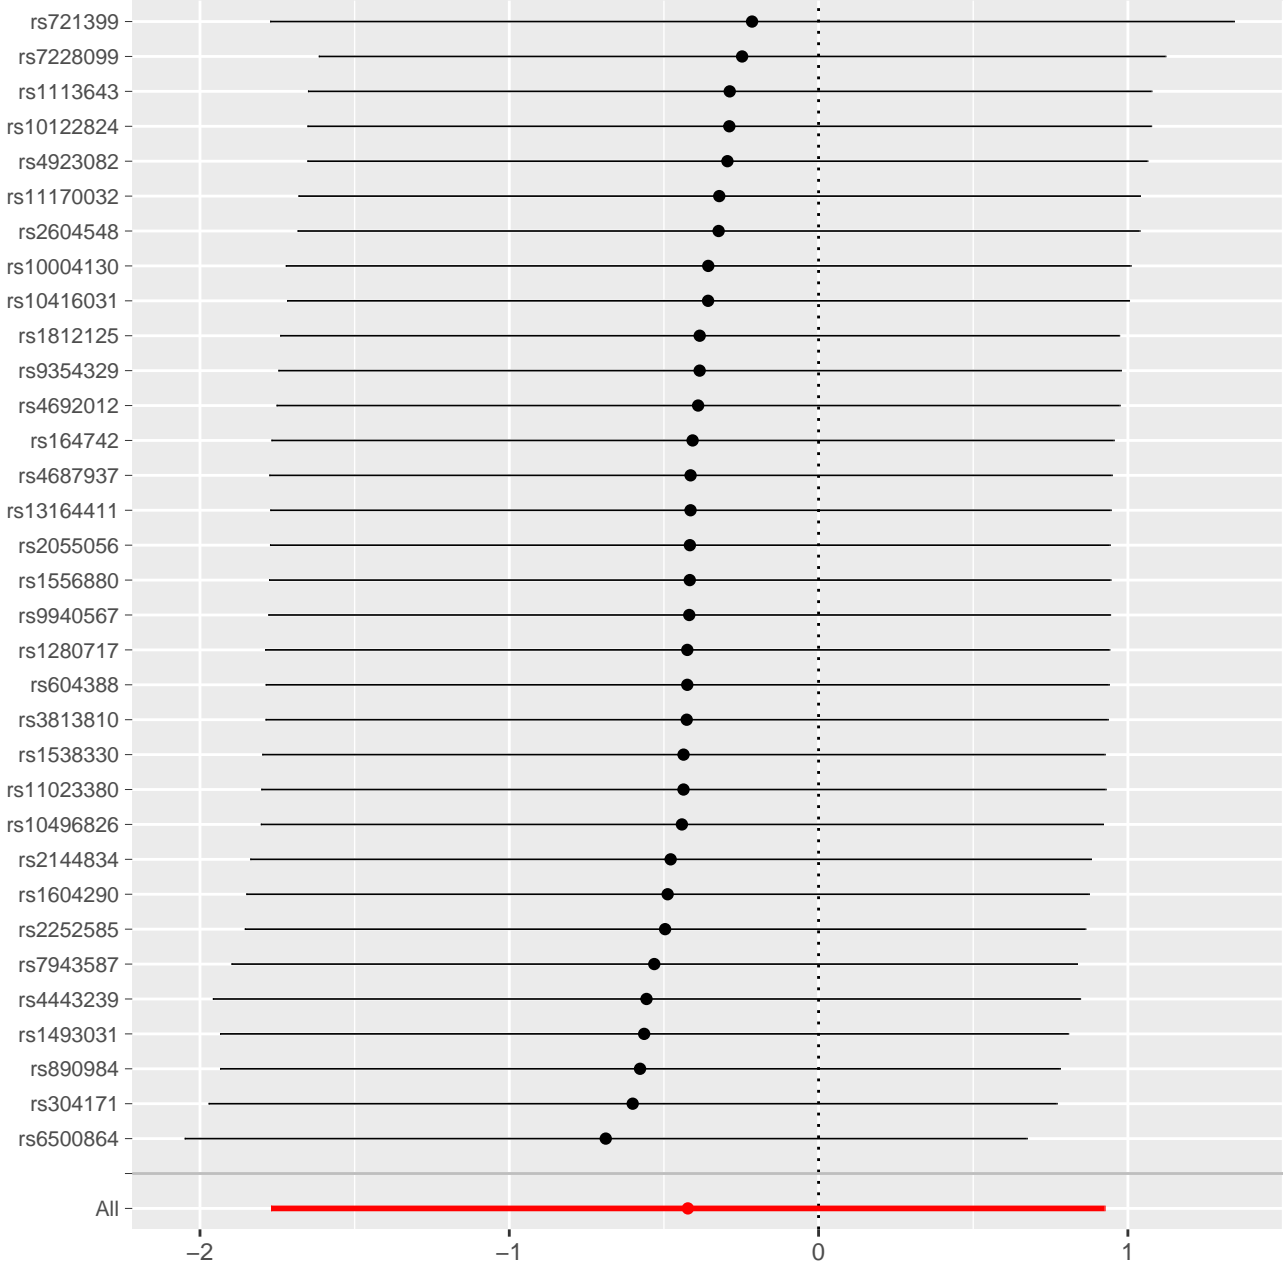



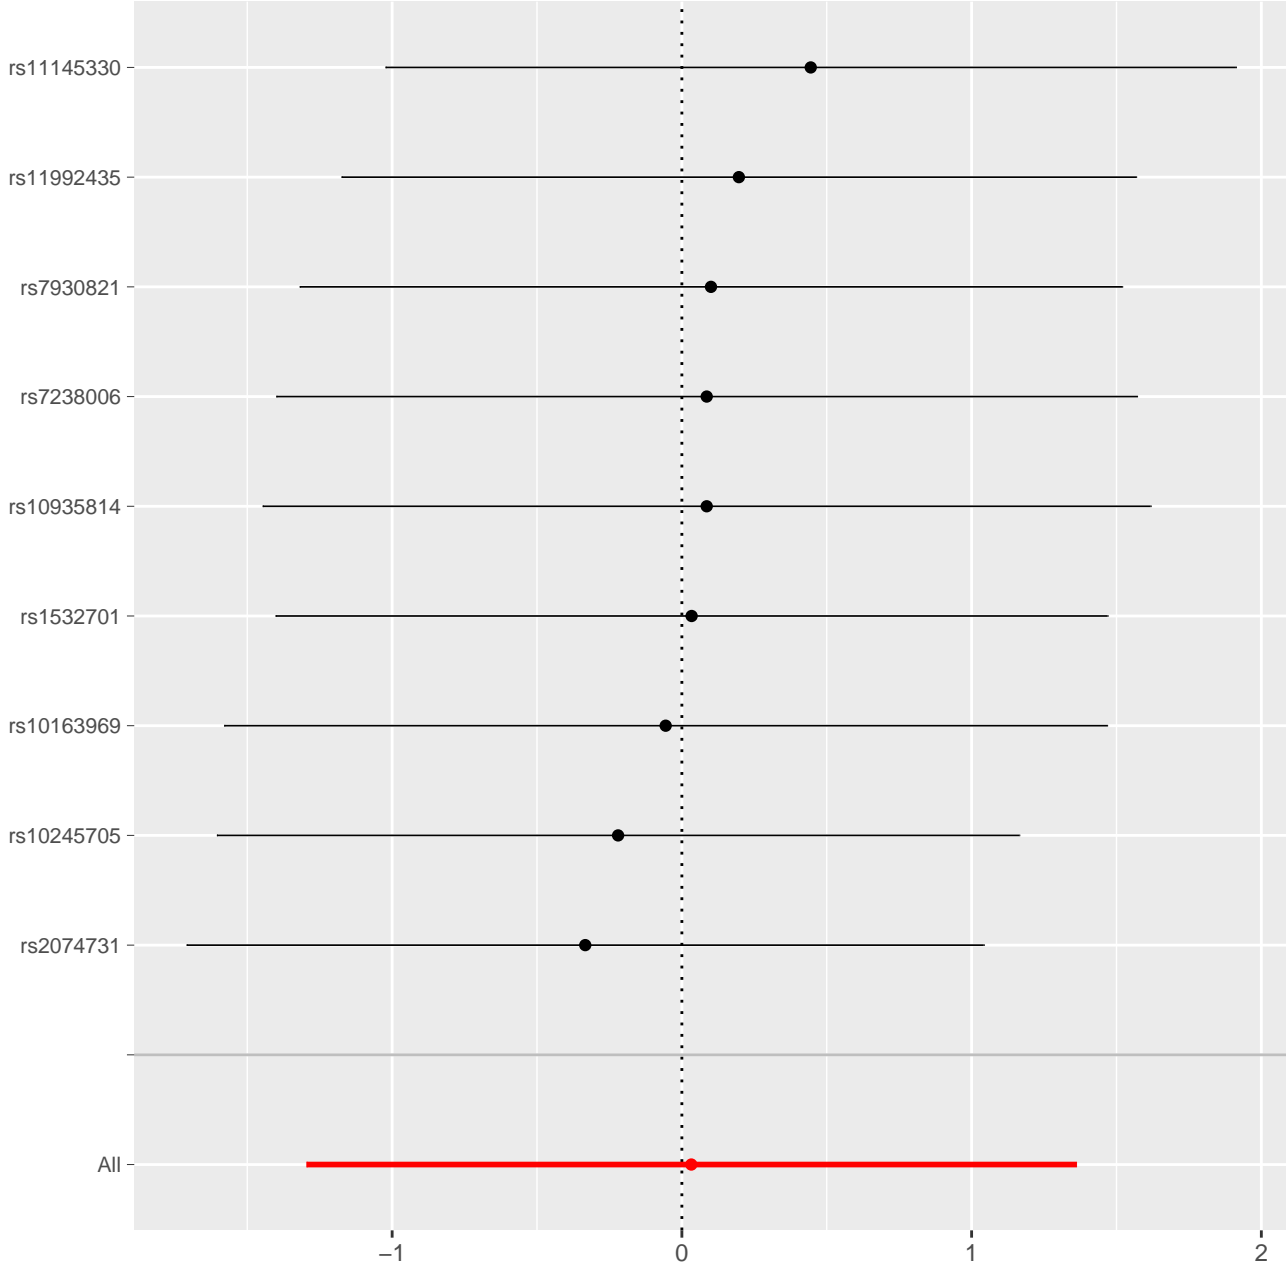

MR leave-one-out sensitivity analysis for 'M01561.metal.pos.txt.gz' on 'JUVEN\_ARTHR.gz'

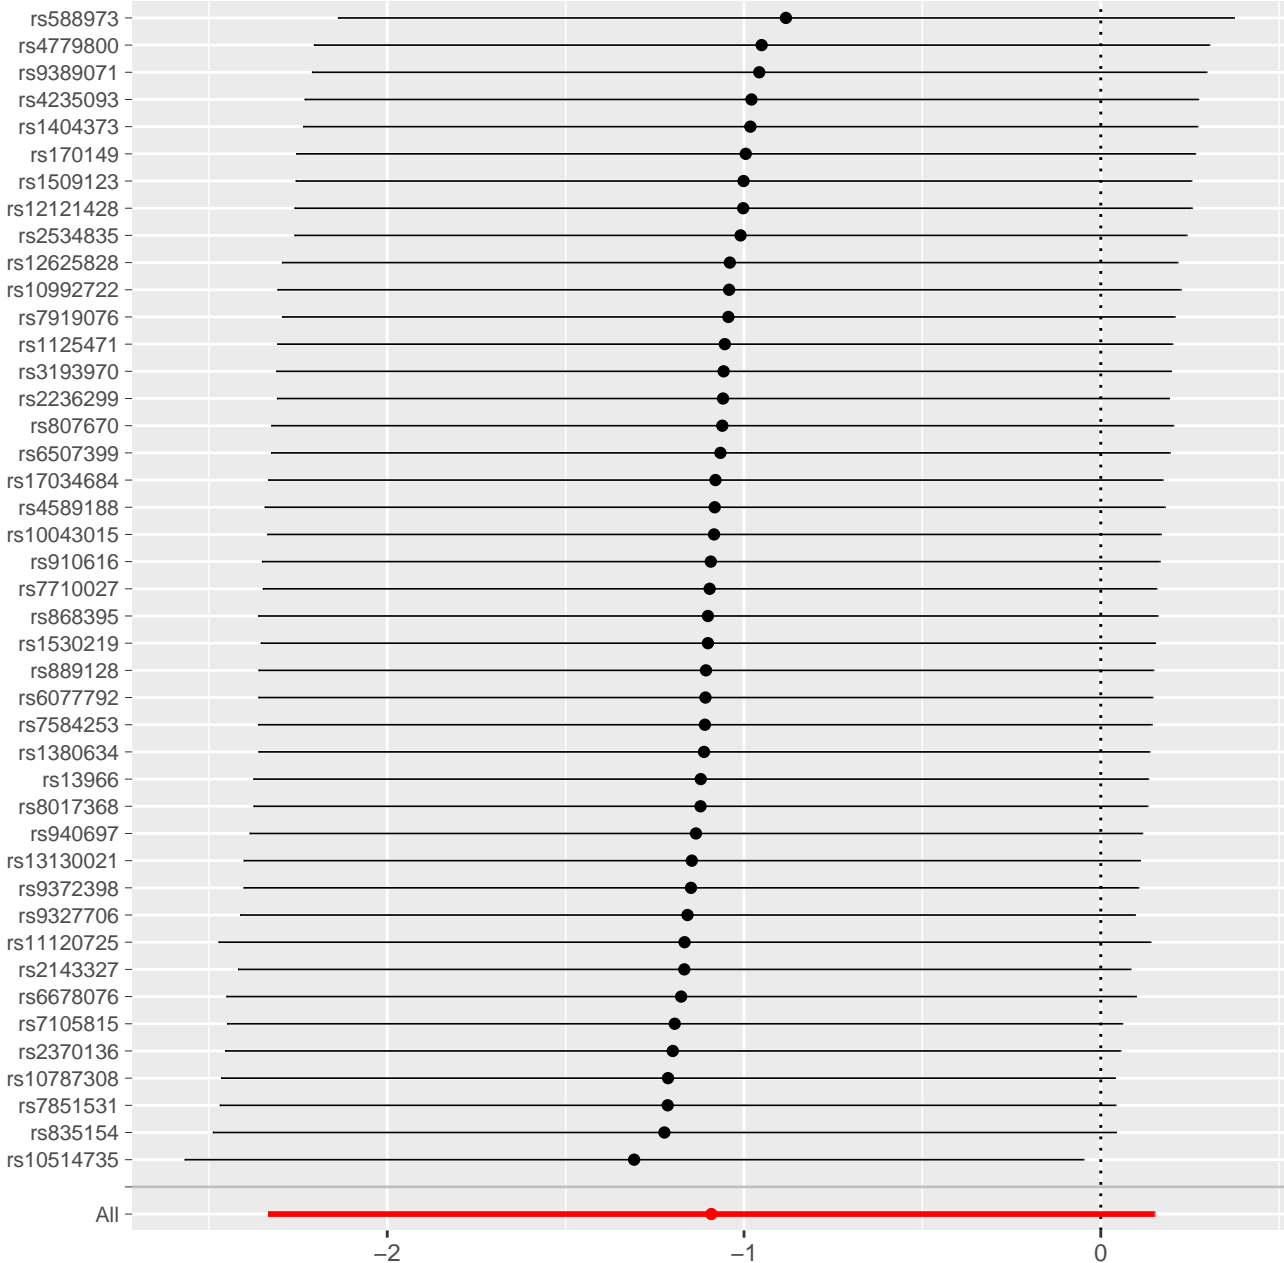

MR leave-one-out sensitivity analysis for 'M01564.metal.pos.txt.gz' on 'JUVEN\_ARTHR.gz'

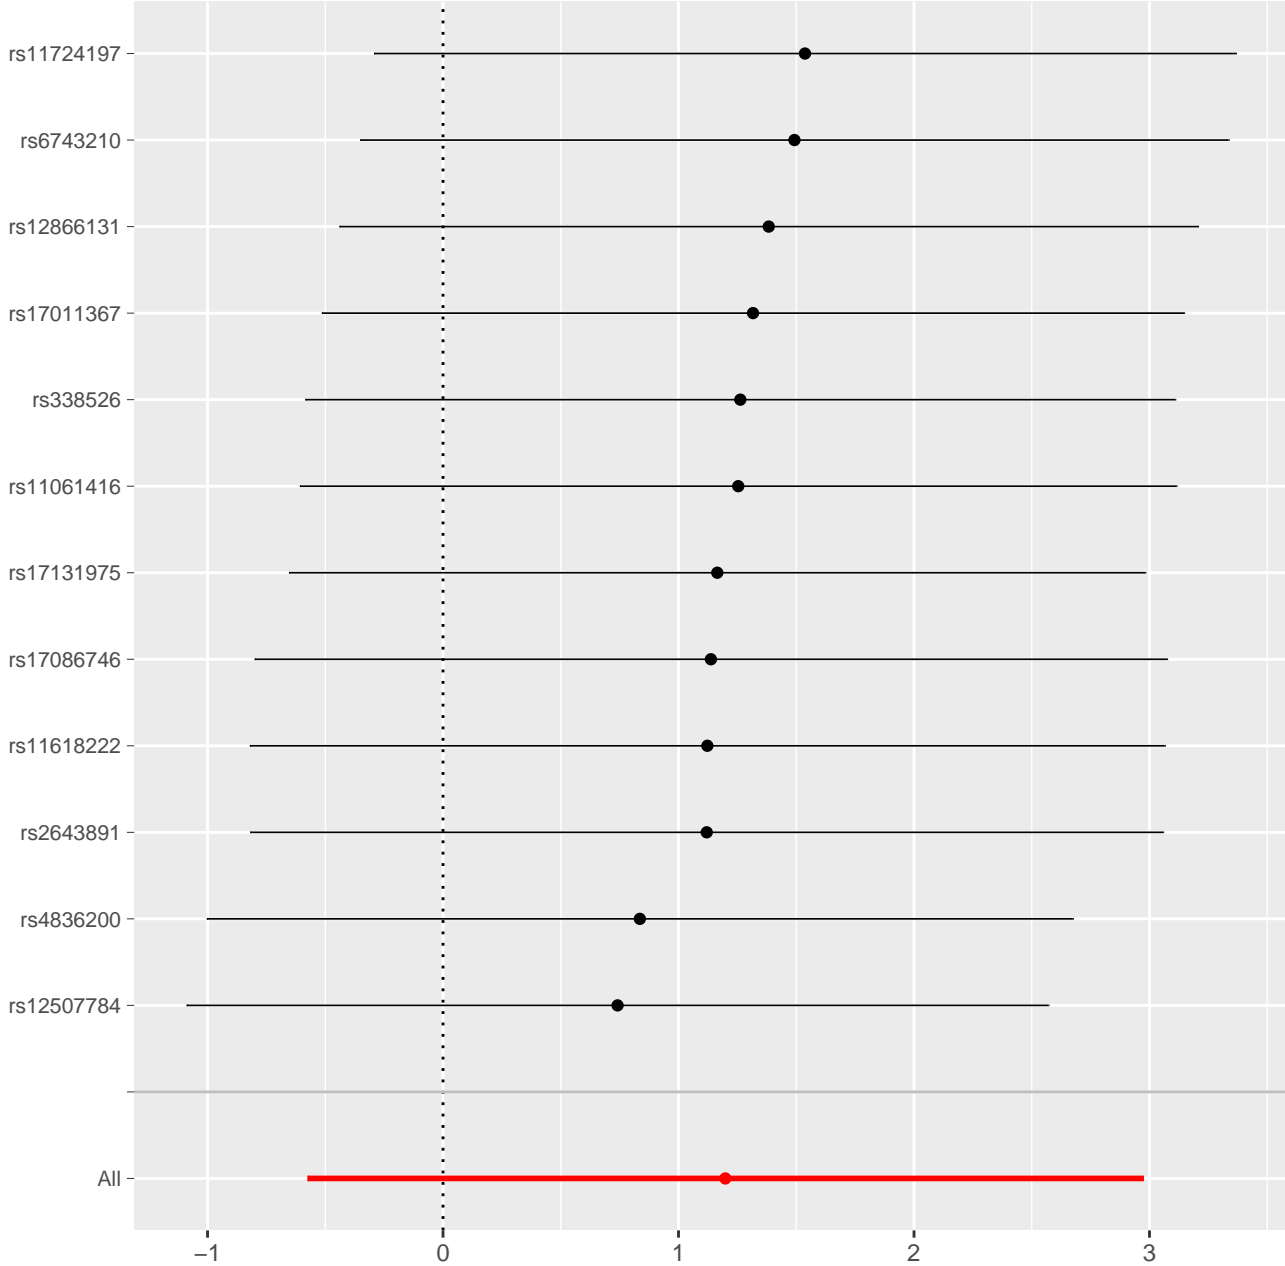

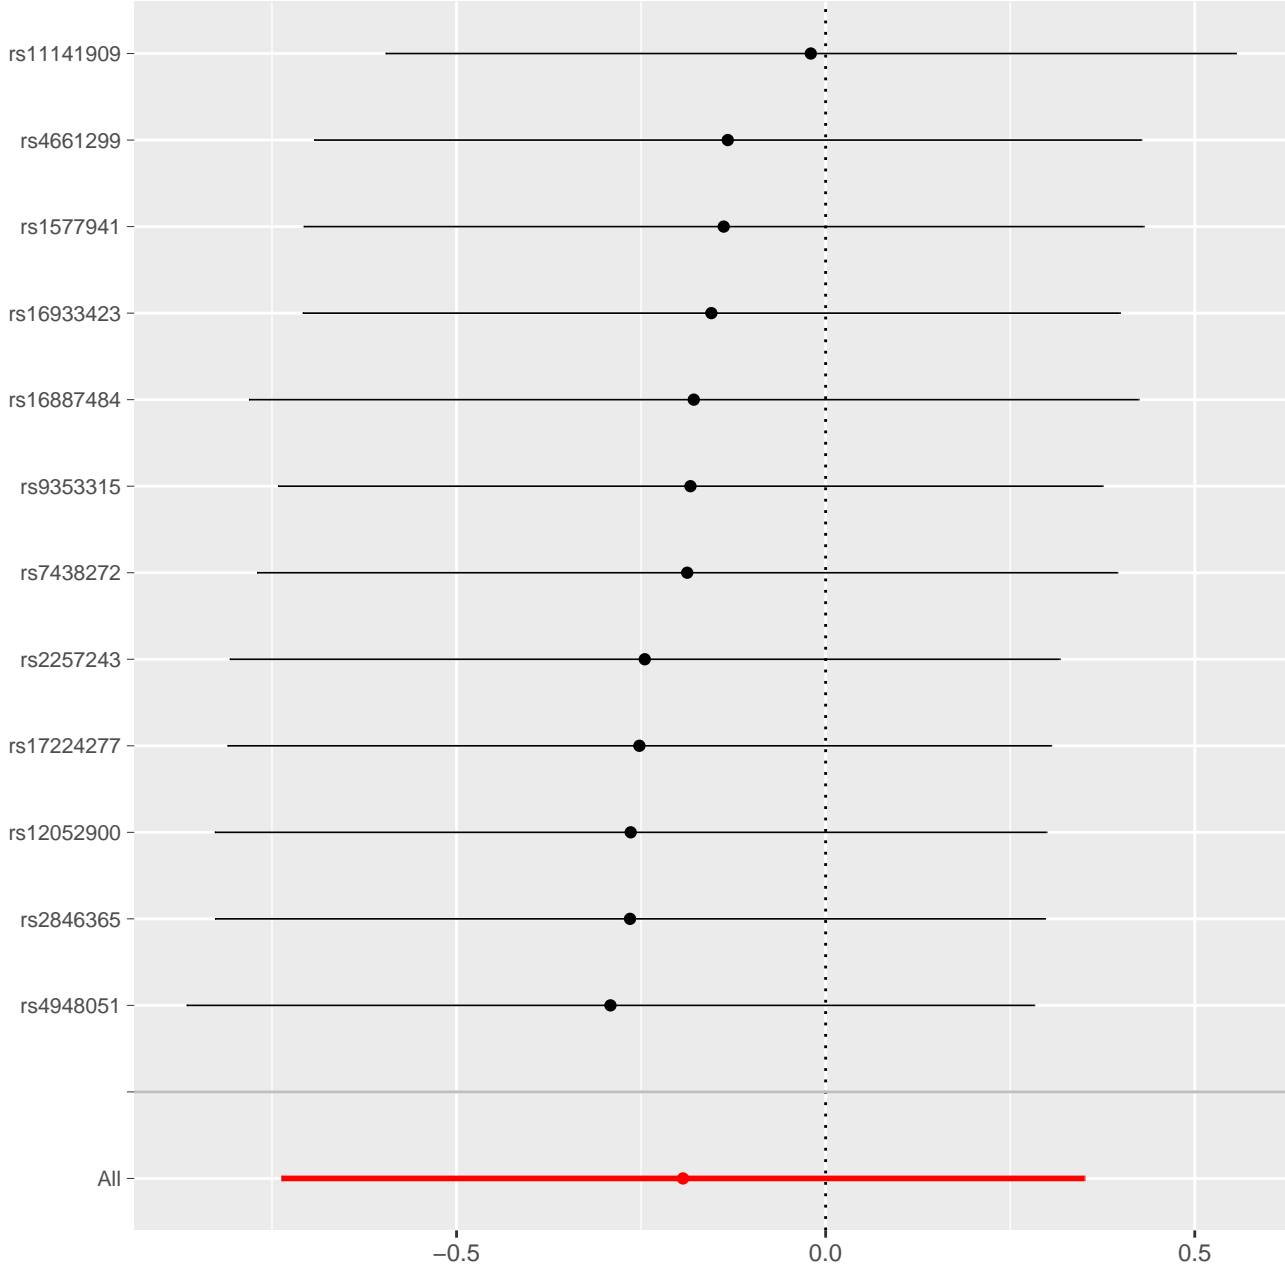

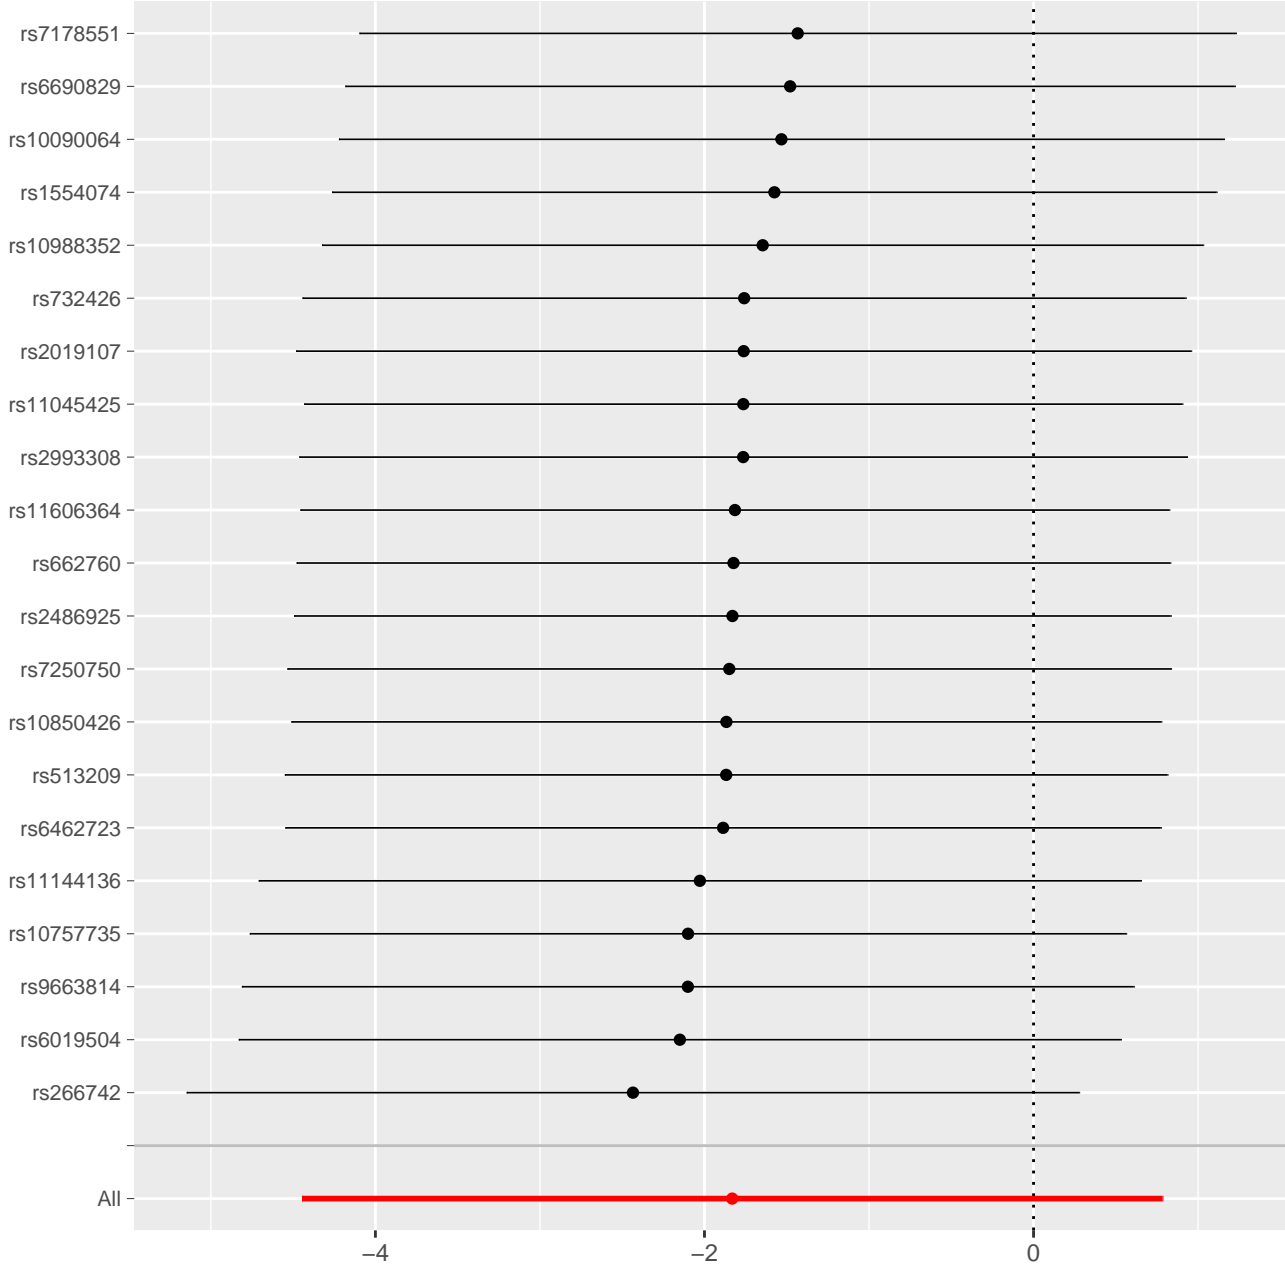

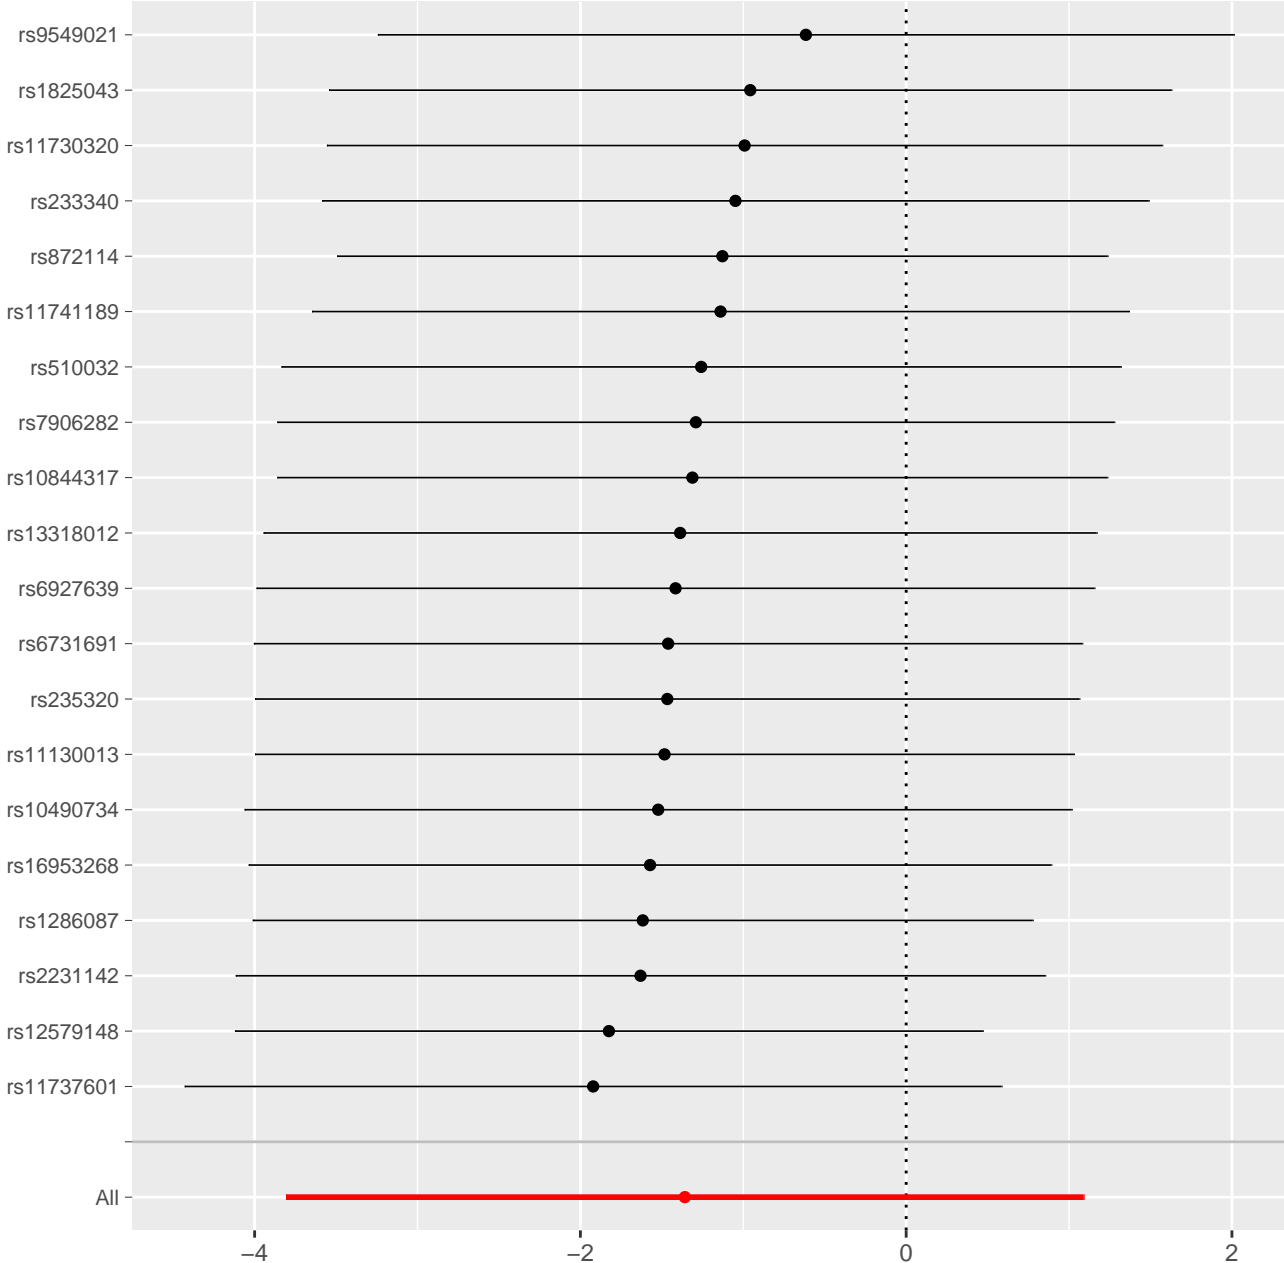

MR leave-one-out sensitivity analysis for 'M01604.metal.pos.txt.gz' on 'JUVEN\_ARTHR.gz'

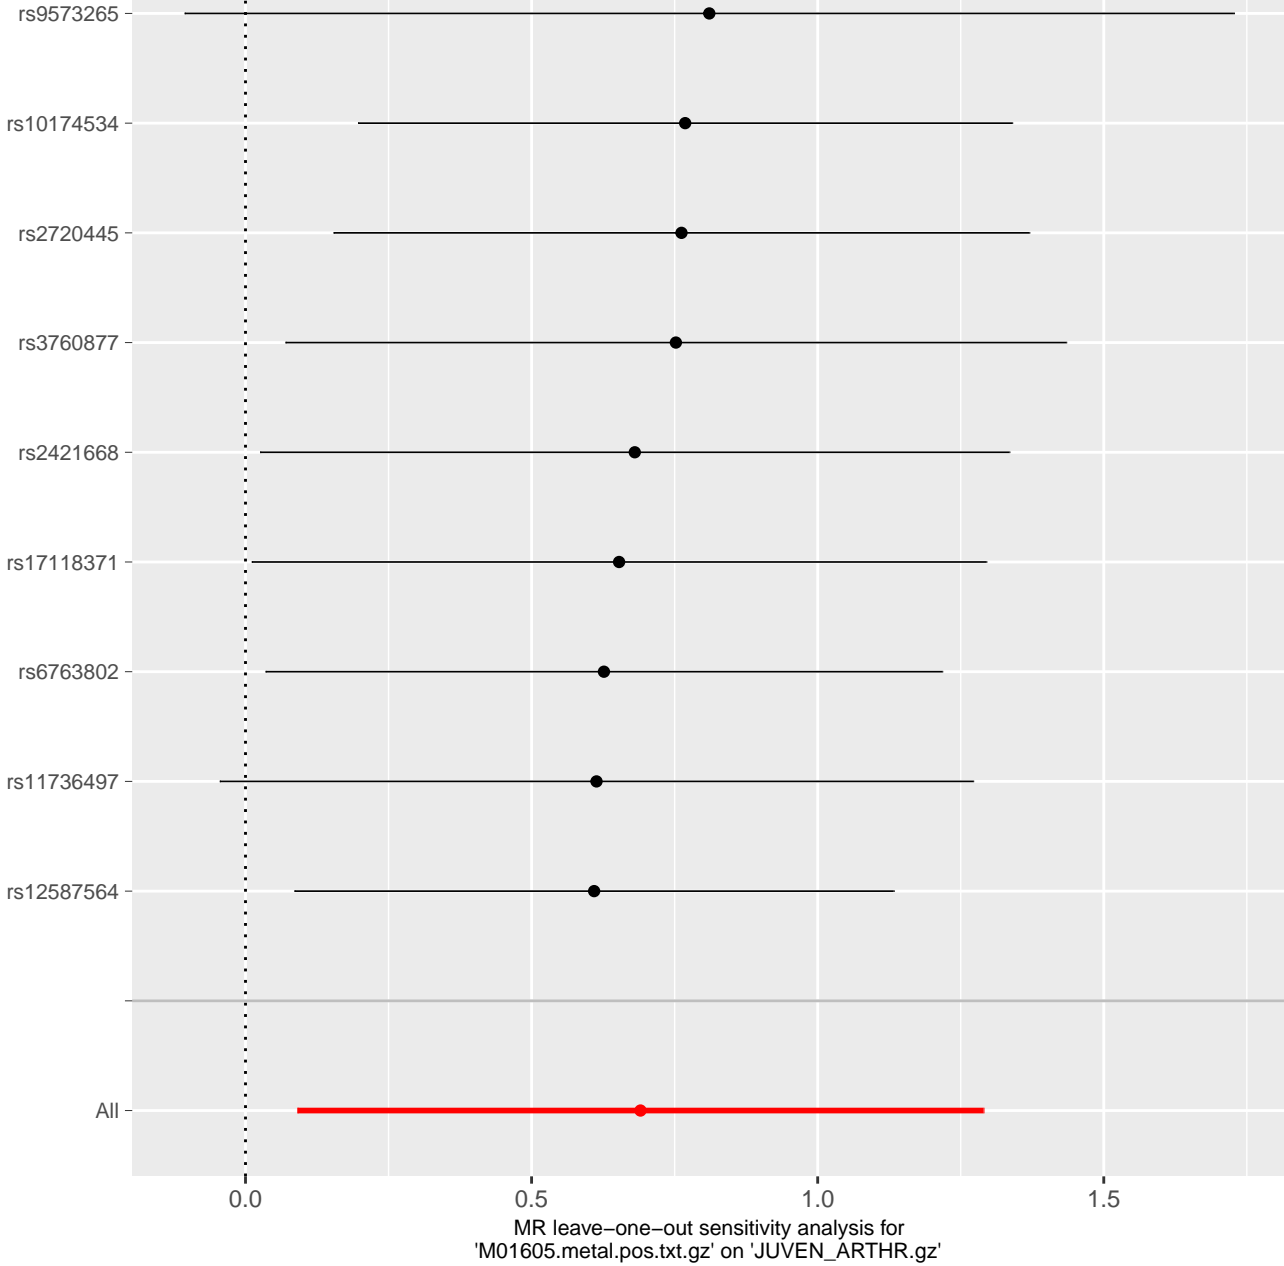

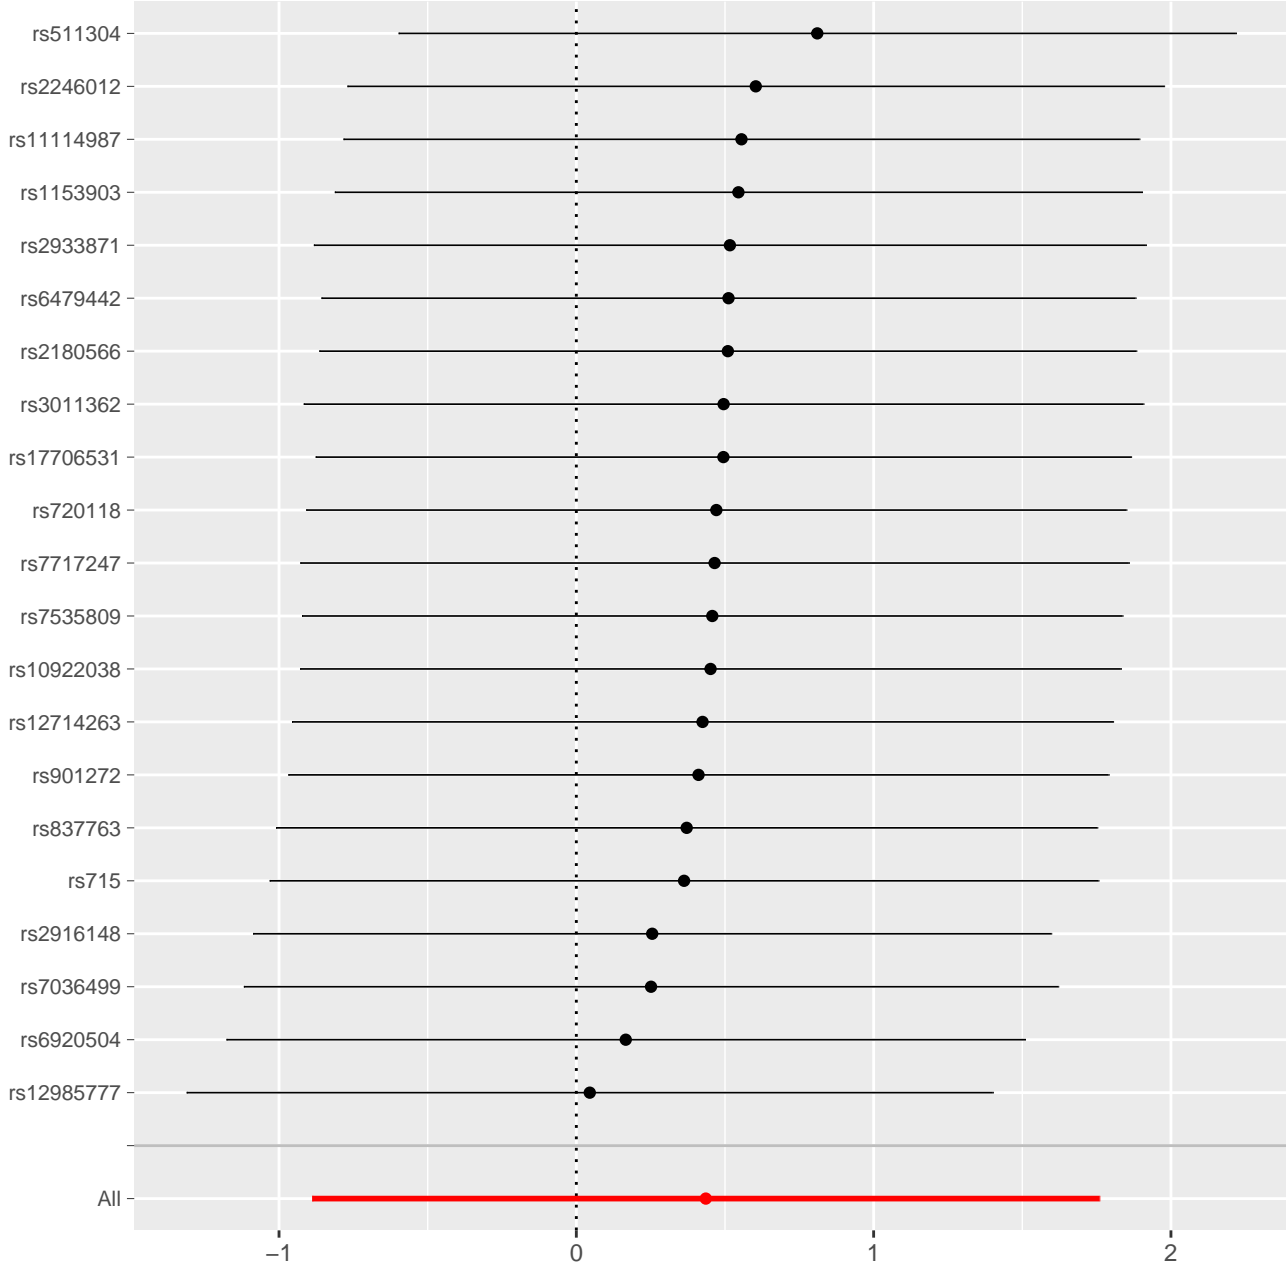



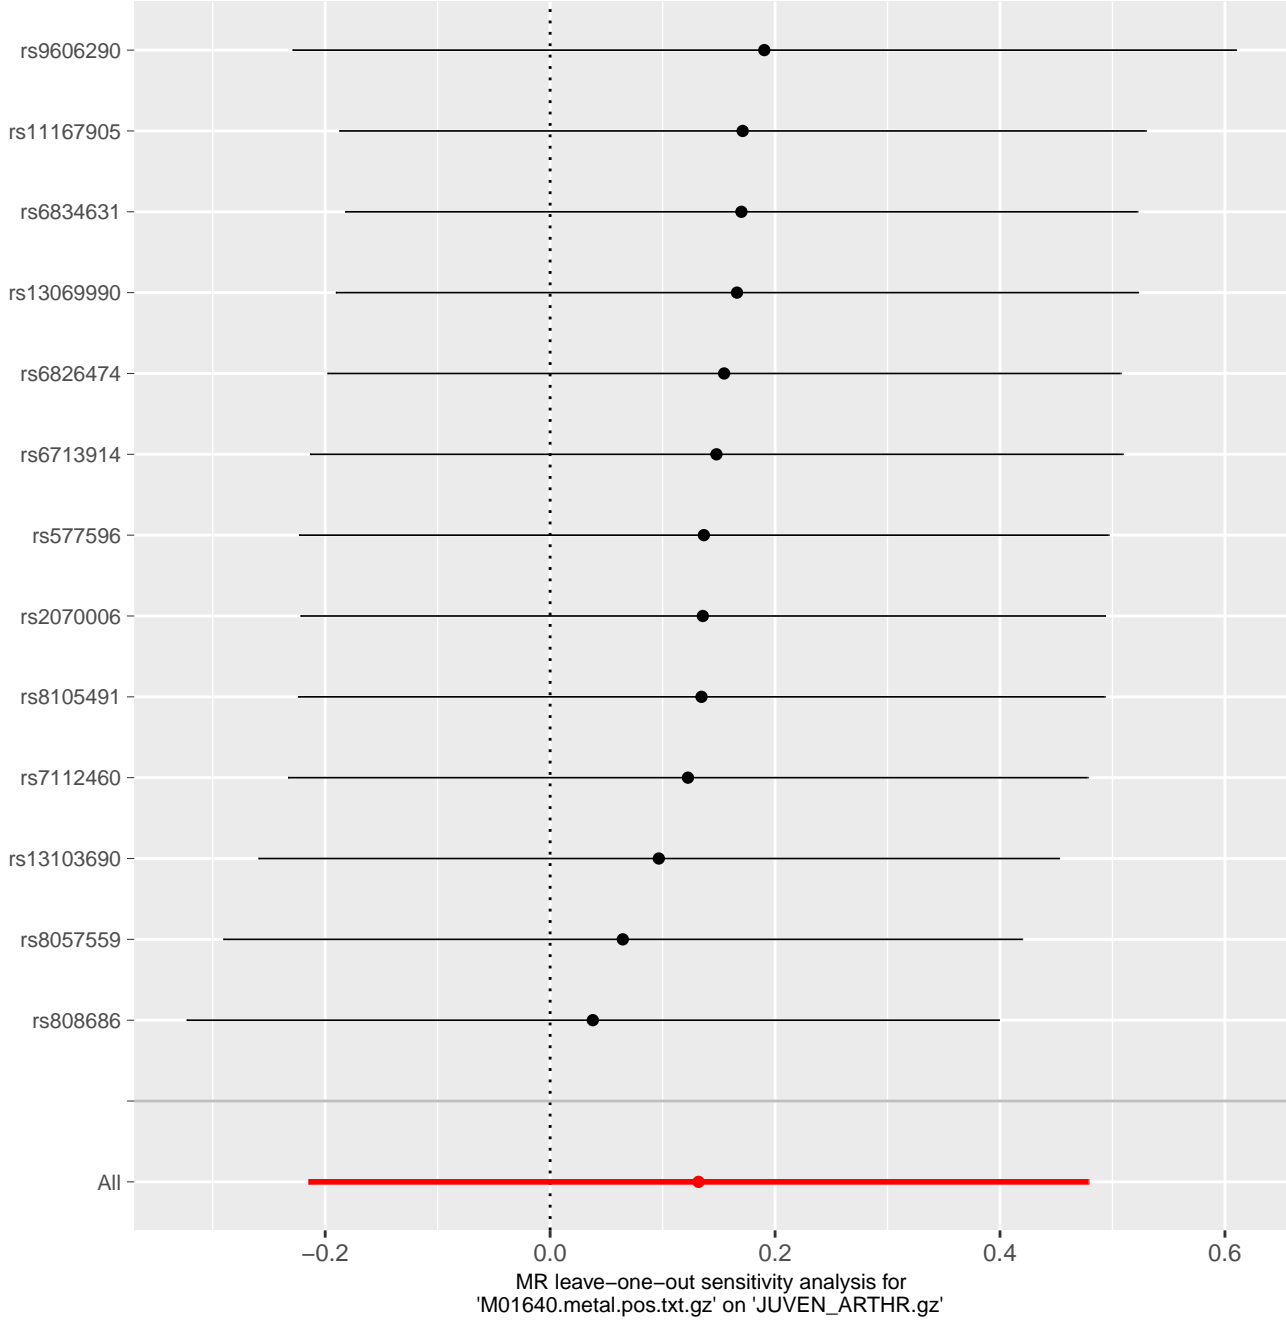

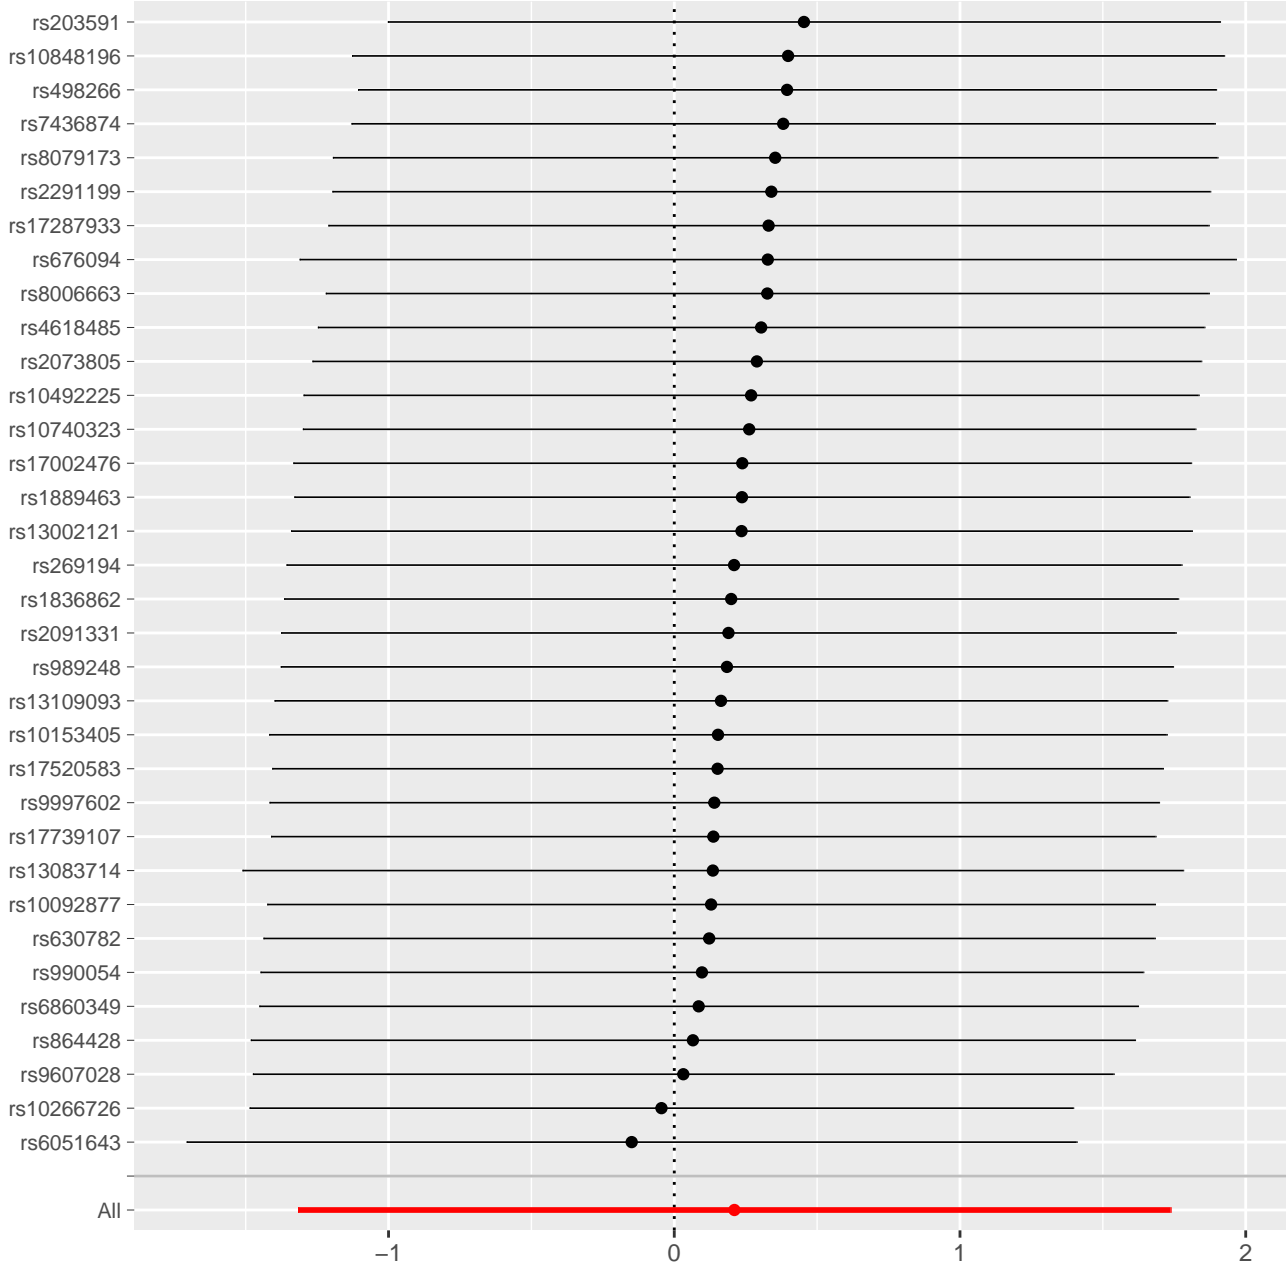

MR leave-one-out sensitivity analysis for 'M01644.metal.pos.txt.gz' on 'JUVEN\_ARTHR.gz'

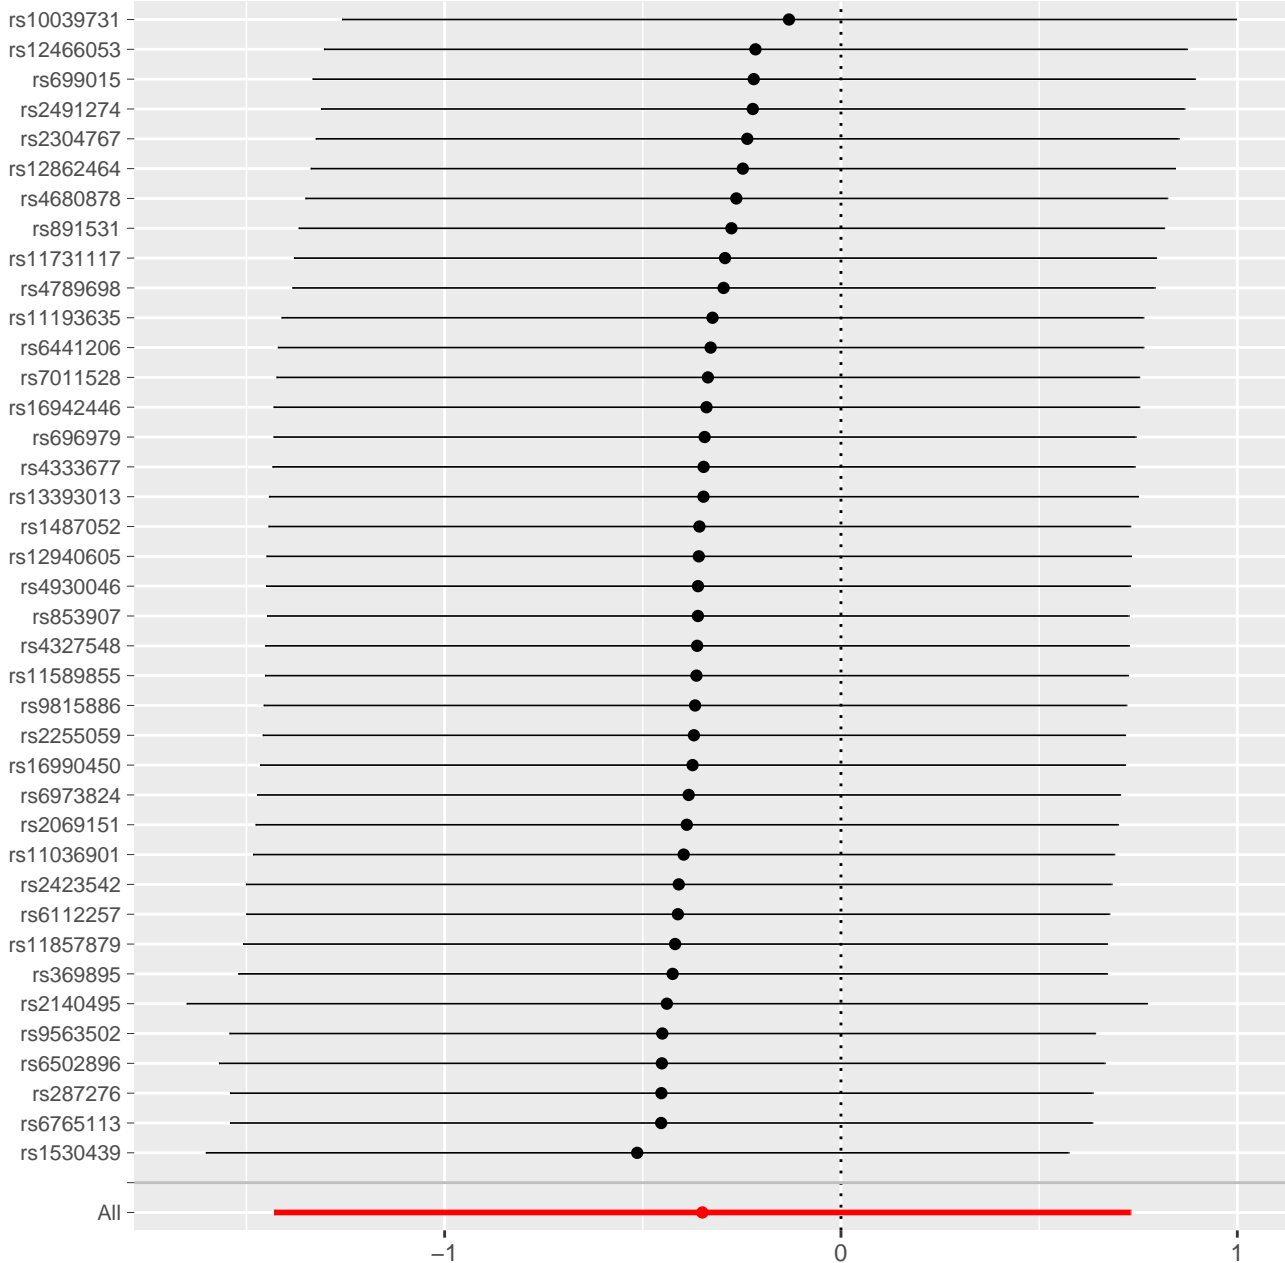

MR leave-one-out sensitivity analysis for 'M01645.metal.pos.txt.gz' on 'JUVEN\_ARTHR.gz'

rs2373642

rs10050054

rs3762466

rs10181551

rs1440581

All

-5

0

5

10

MR leave-one-out sensitivity analysis for  
'M01649.metal.pos.txt.gz' on 'JUVEN\_ARTHR.gz'

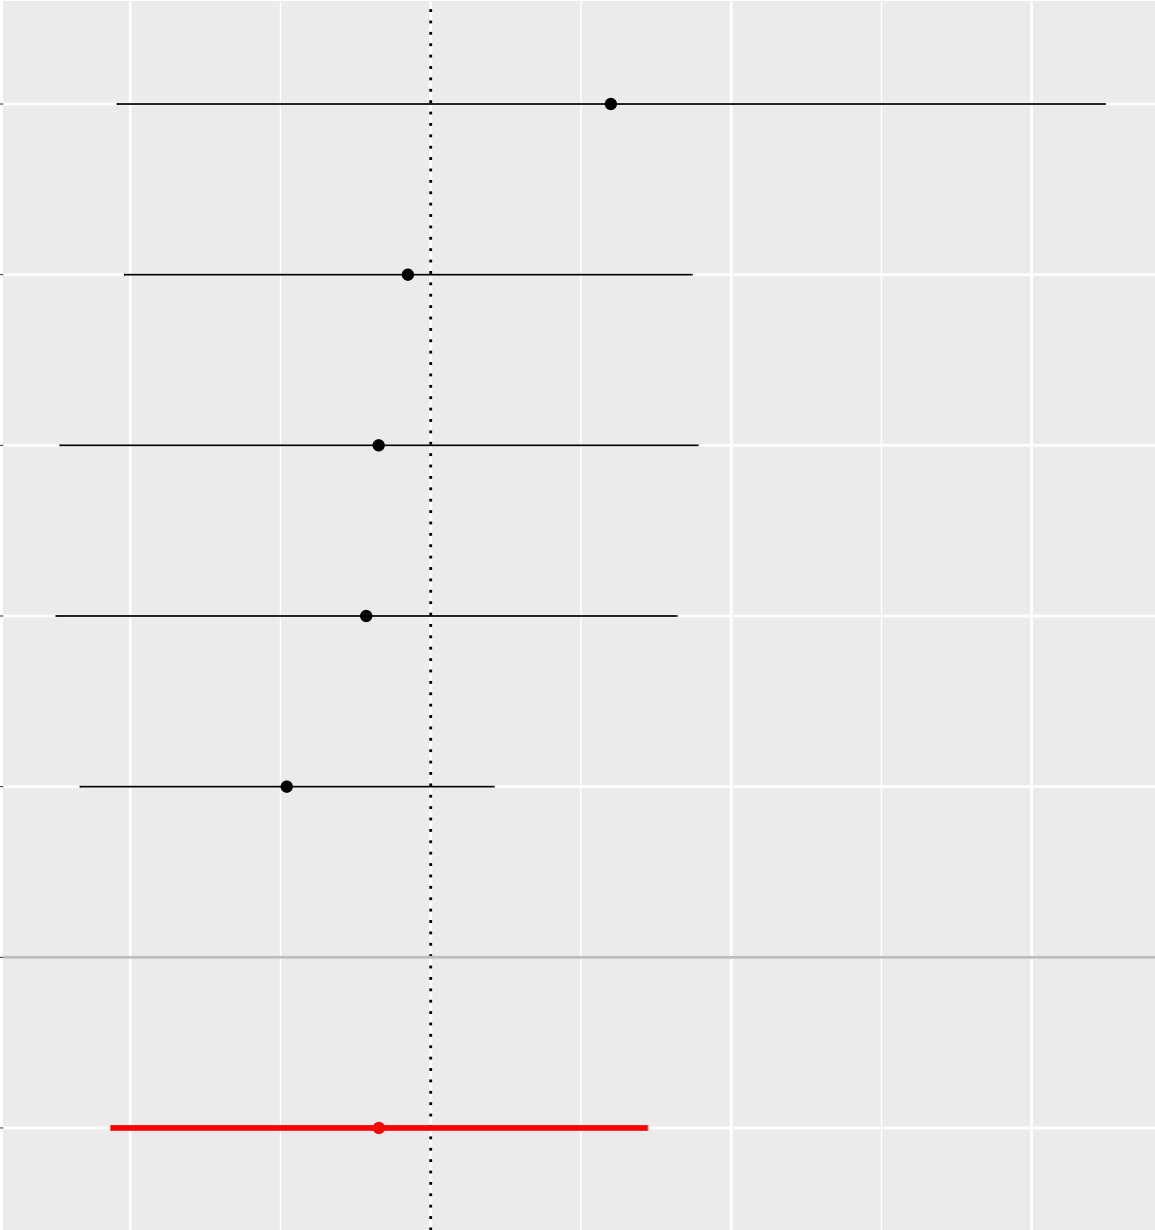

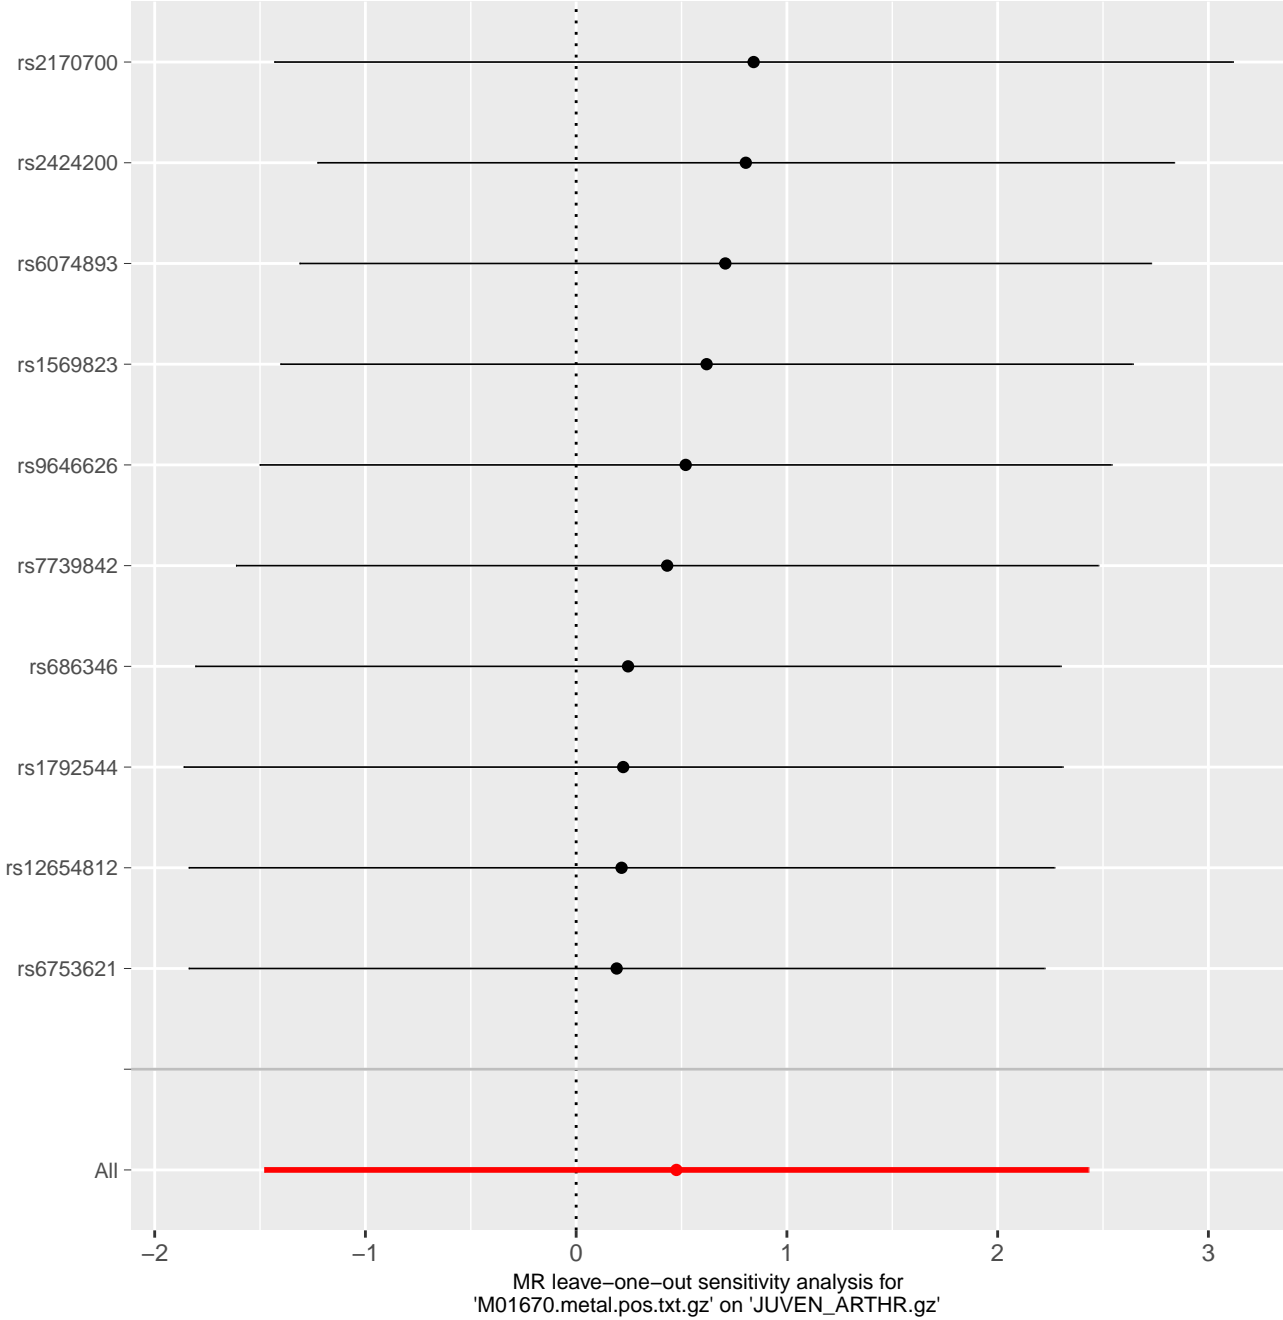

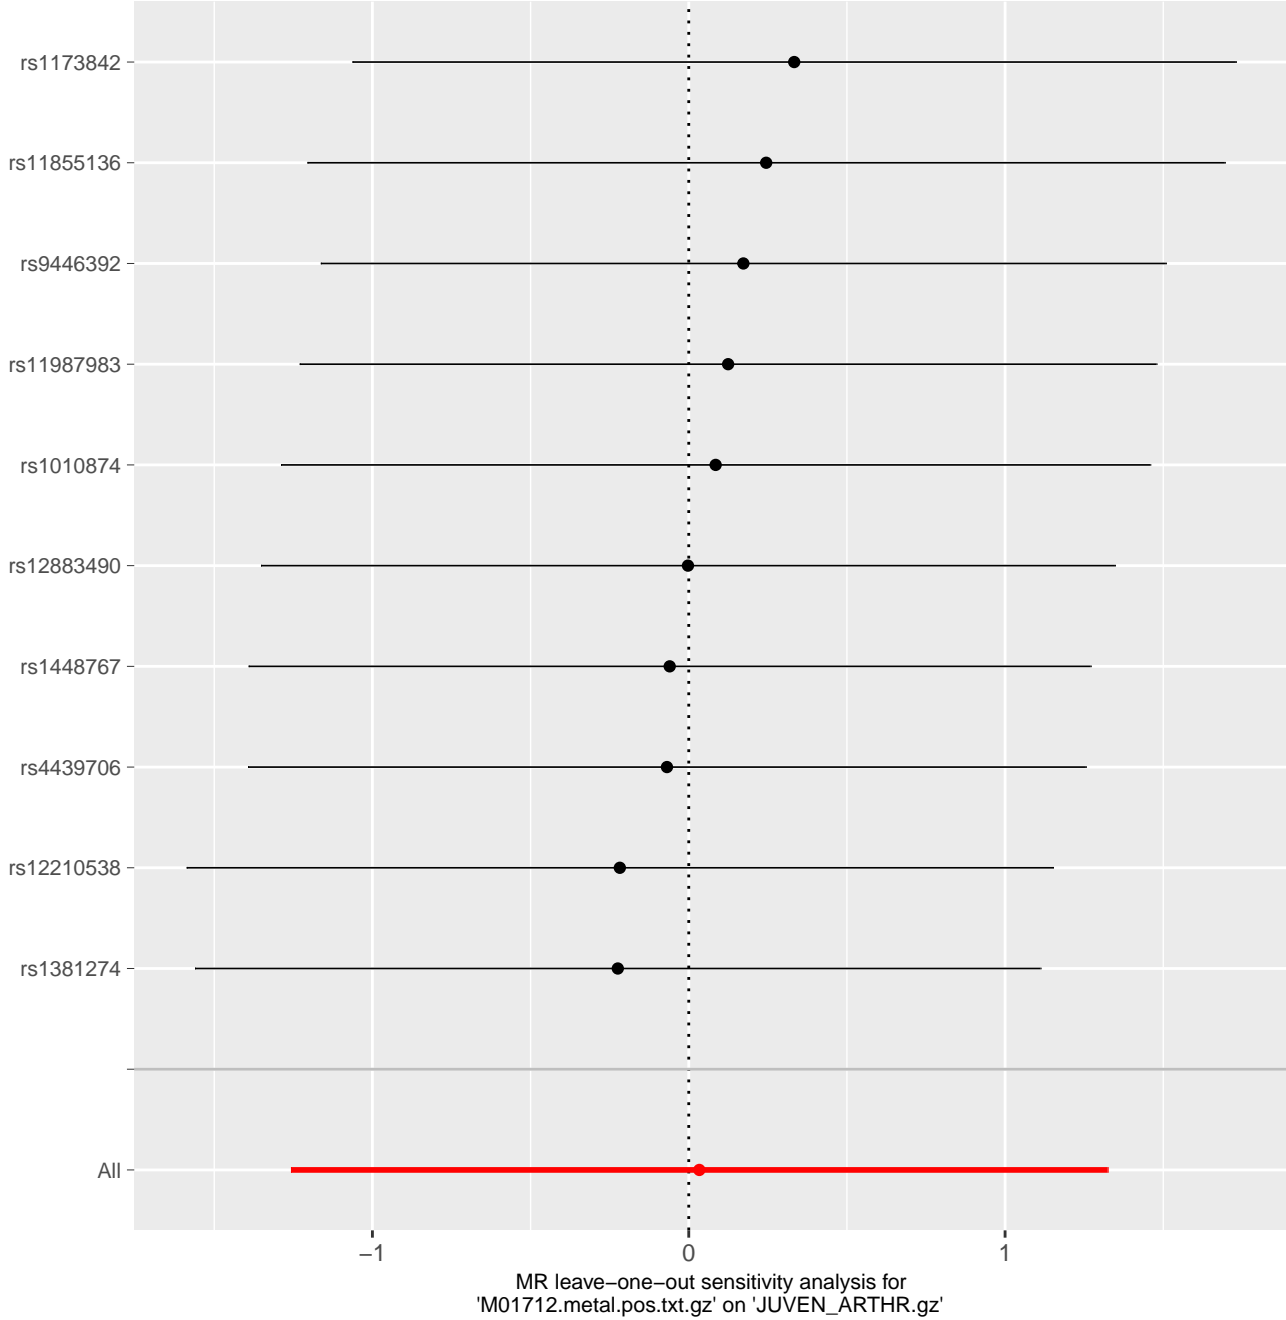

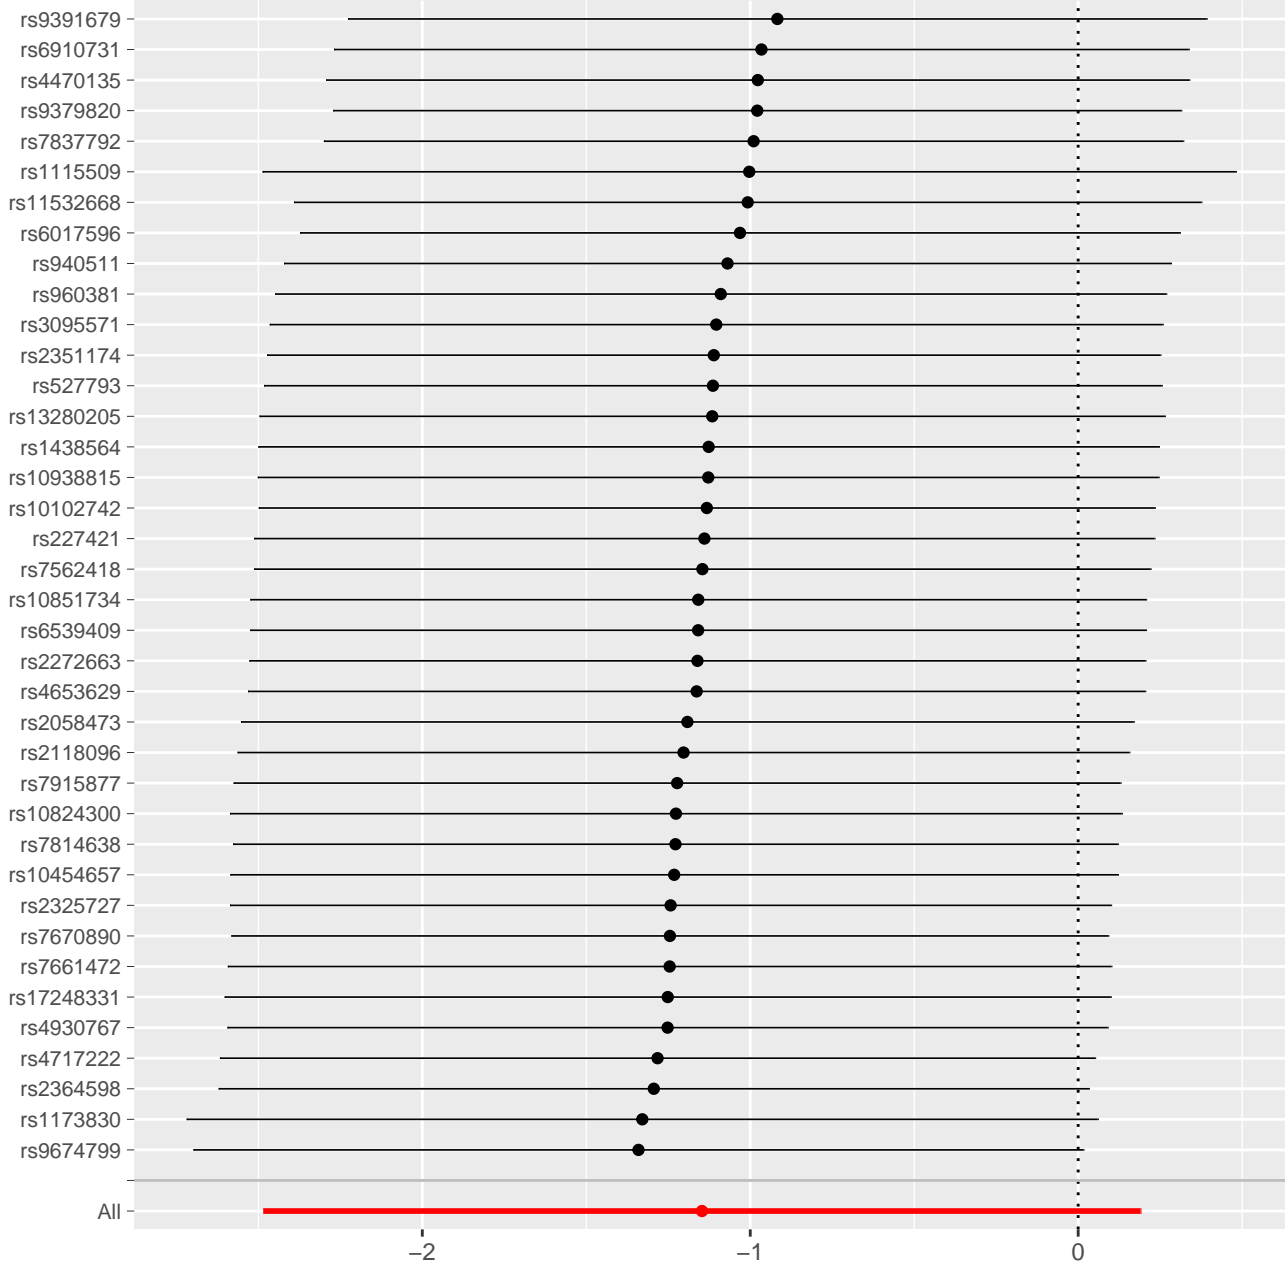

MR leave-one-out sensitivity analysis for 'M01769.metal.pos.txt.gz' on 'JUVEN\_ARTHR.gz'

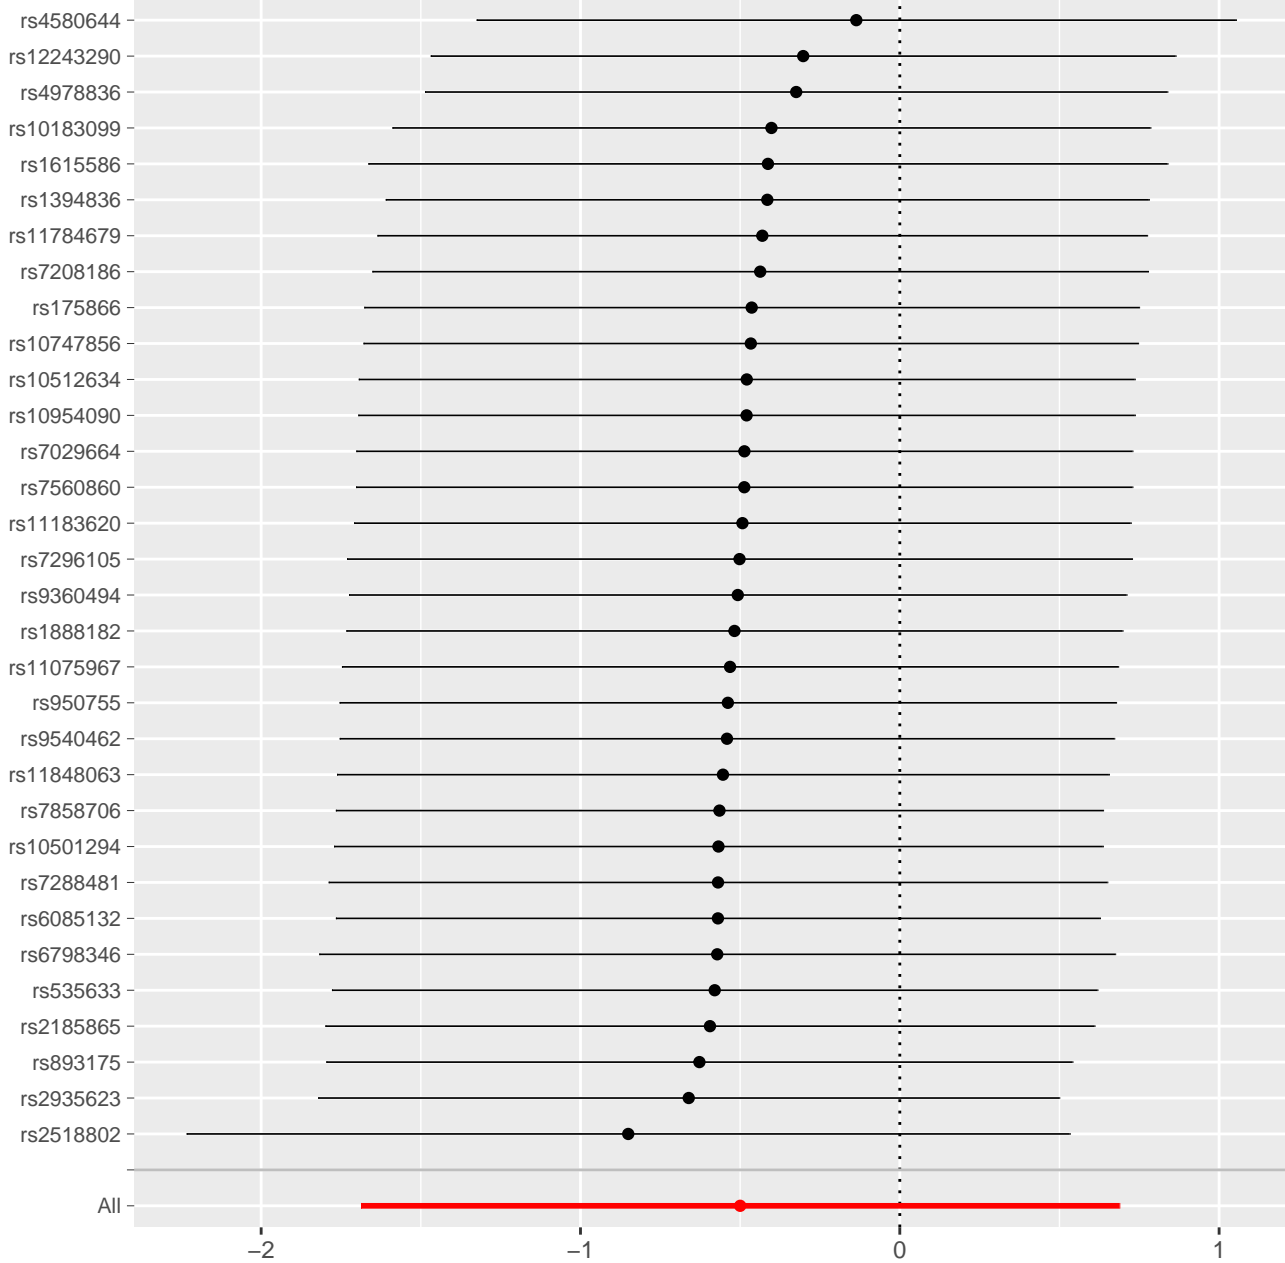

MR leave-one-out sensitivity analysis for 'M01898.metal.pos.txt.gz' on 'JUVEN\_ARTHR.gz'



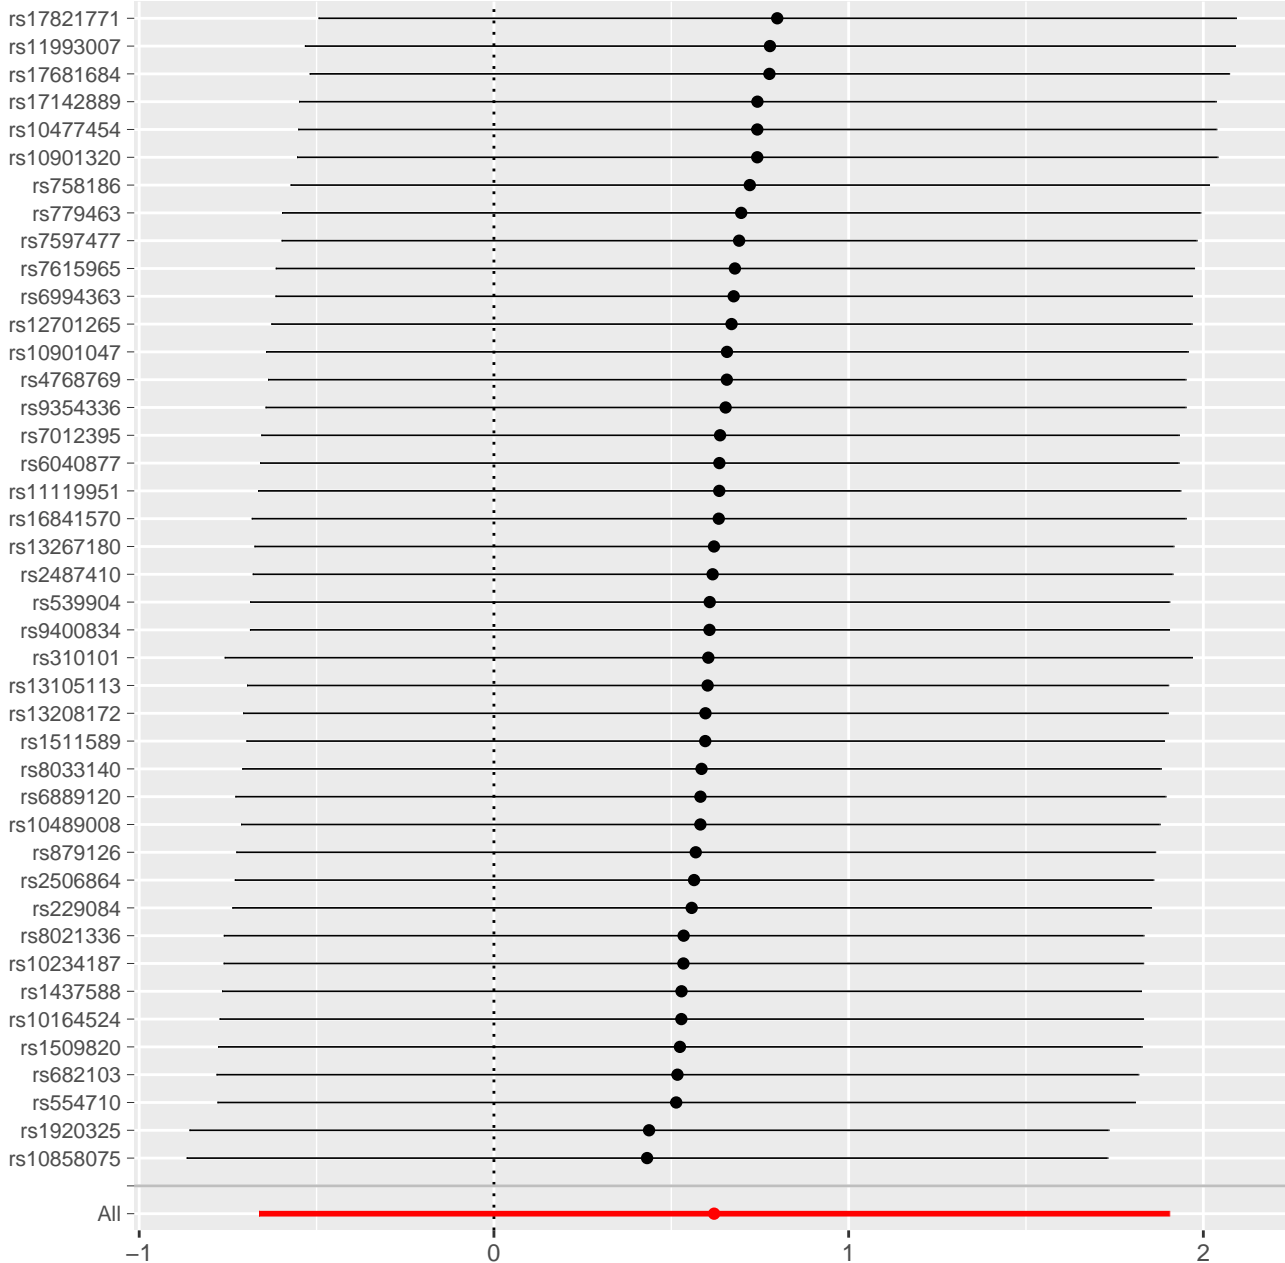

MR leave-one-out sensitivity analysis for 'M02132.metal.pos.txt.gz' on 'JUVEN\_ARTHR.gz'

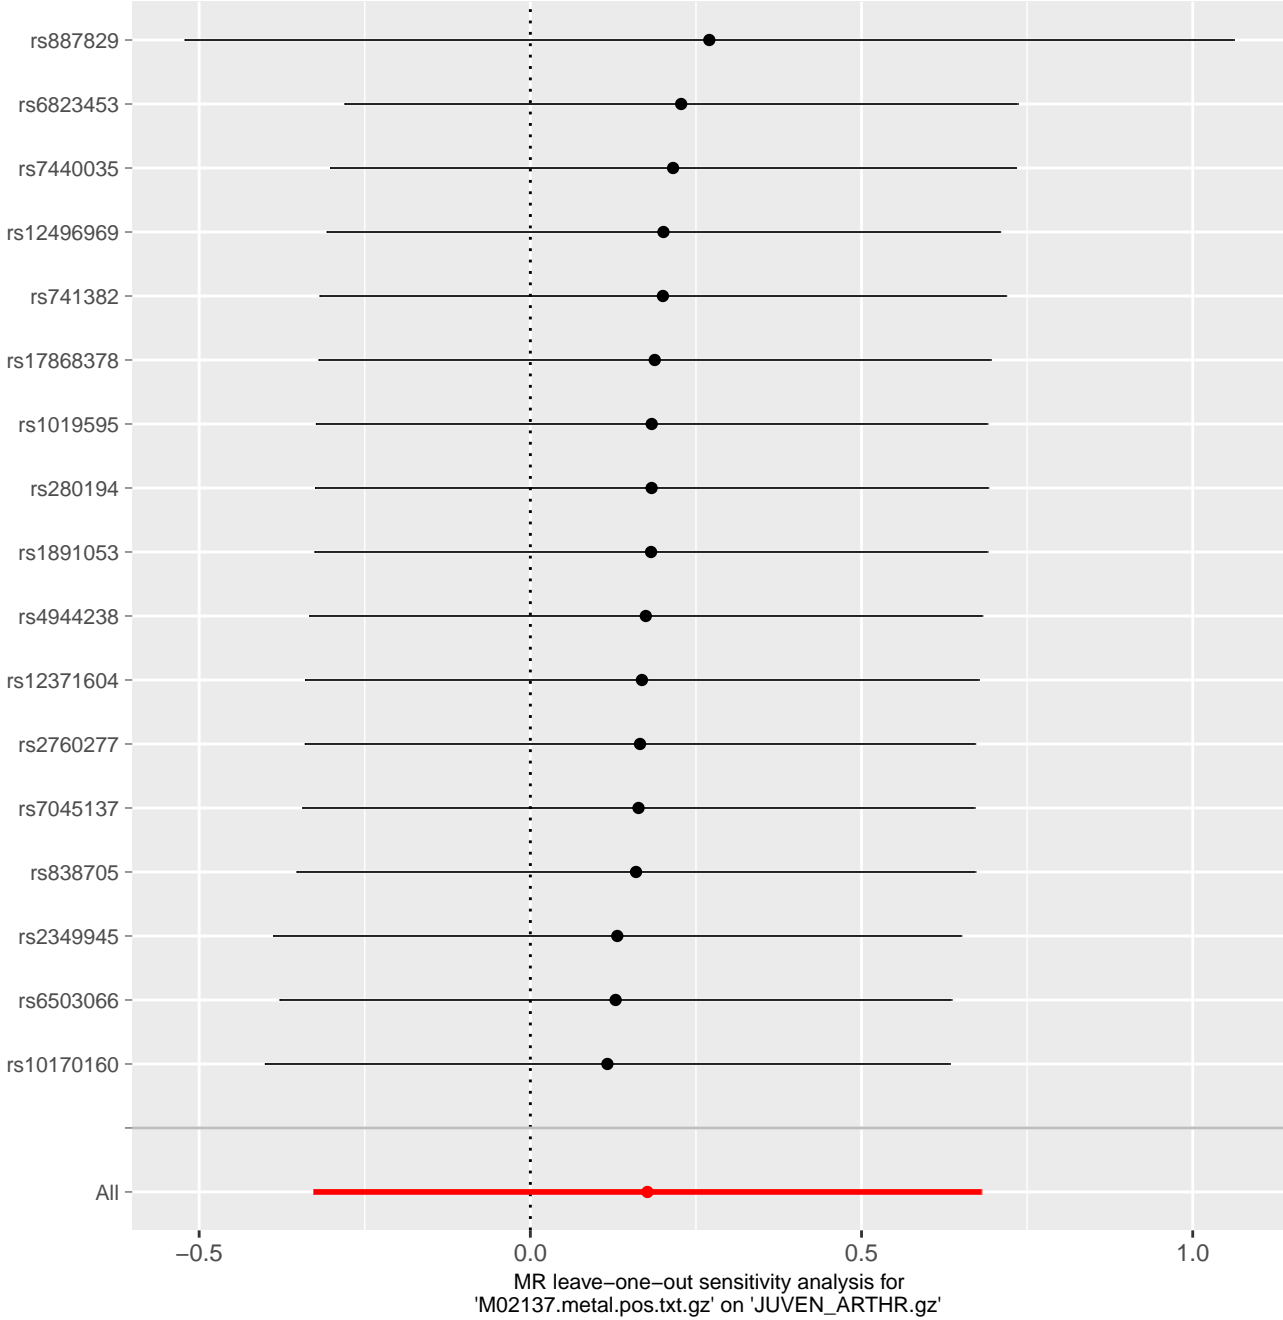

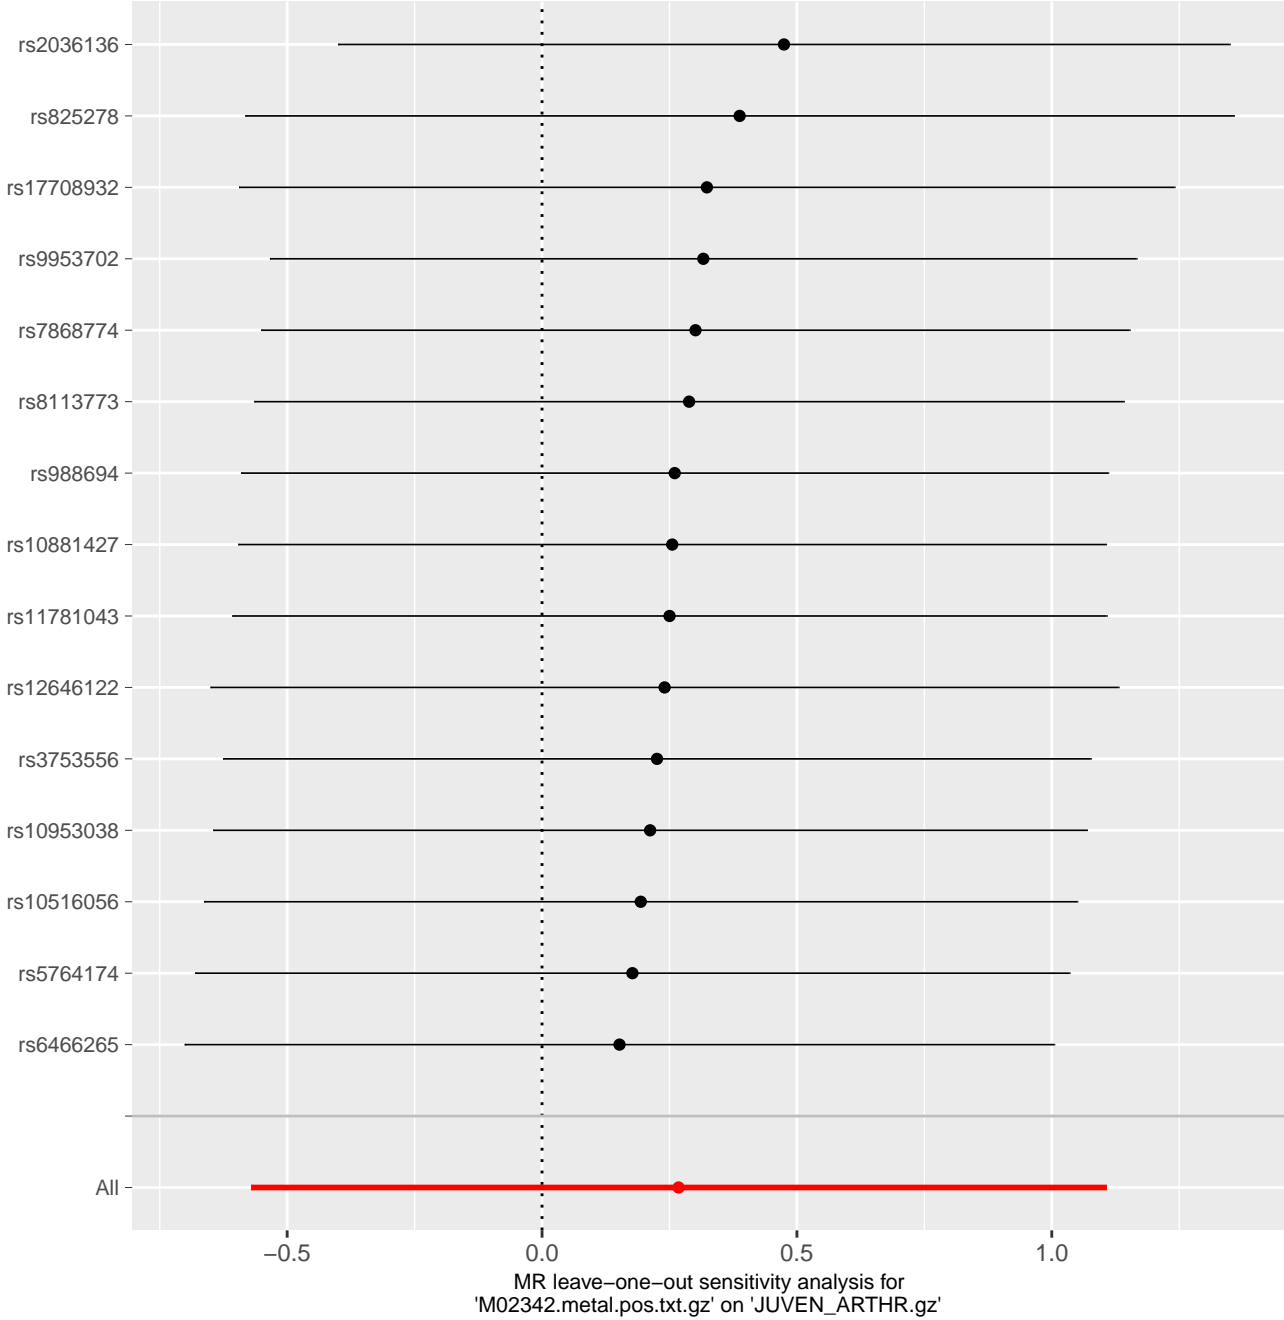

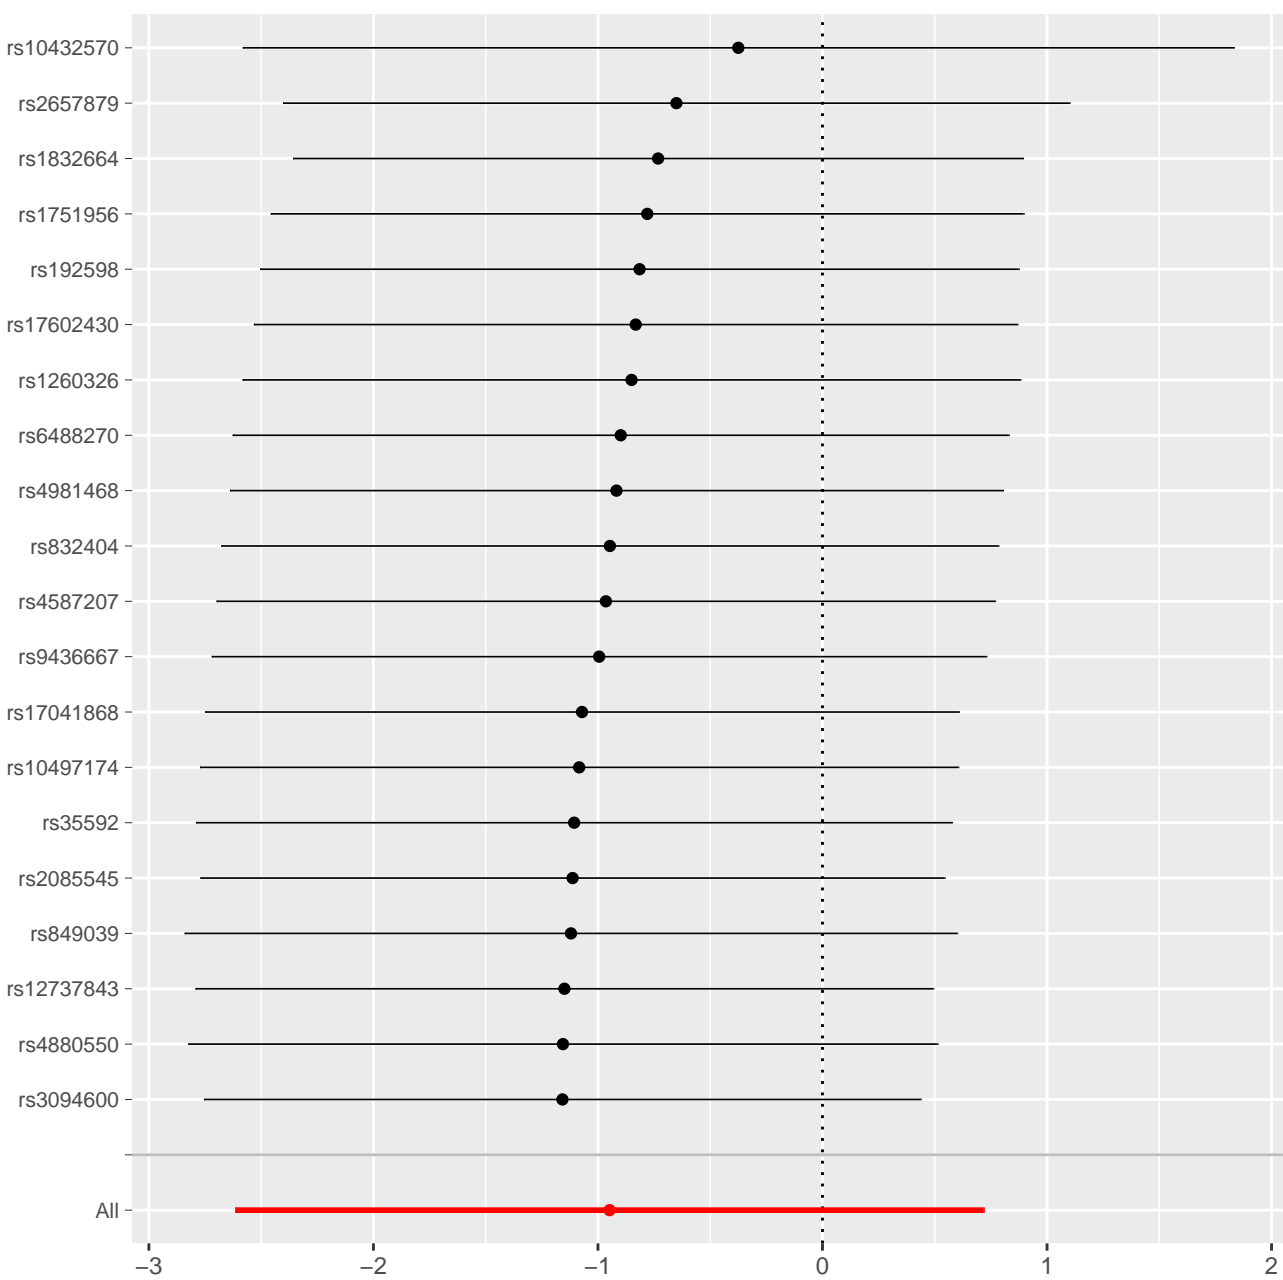

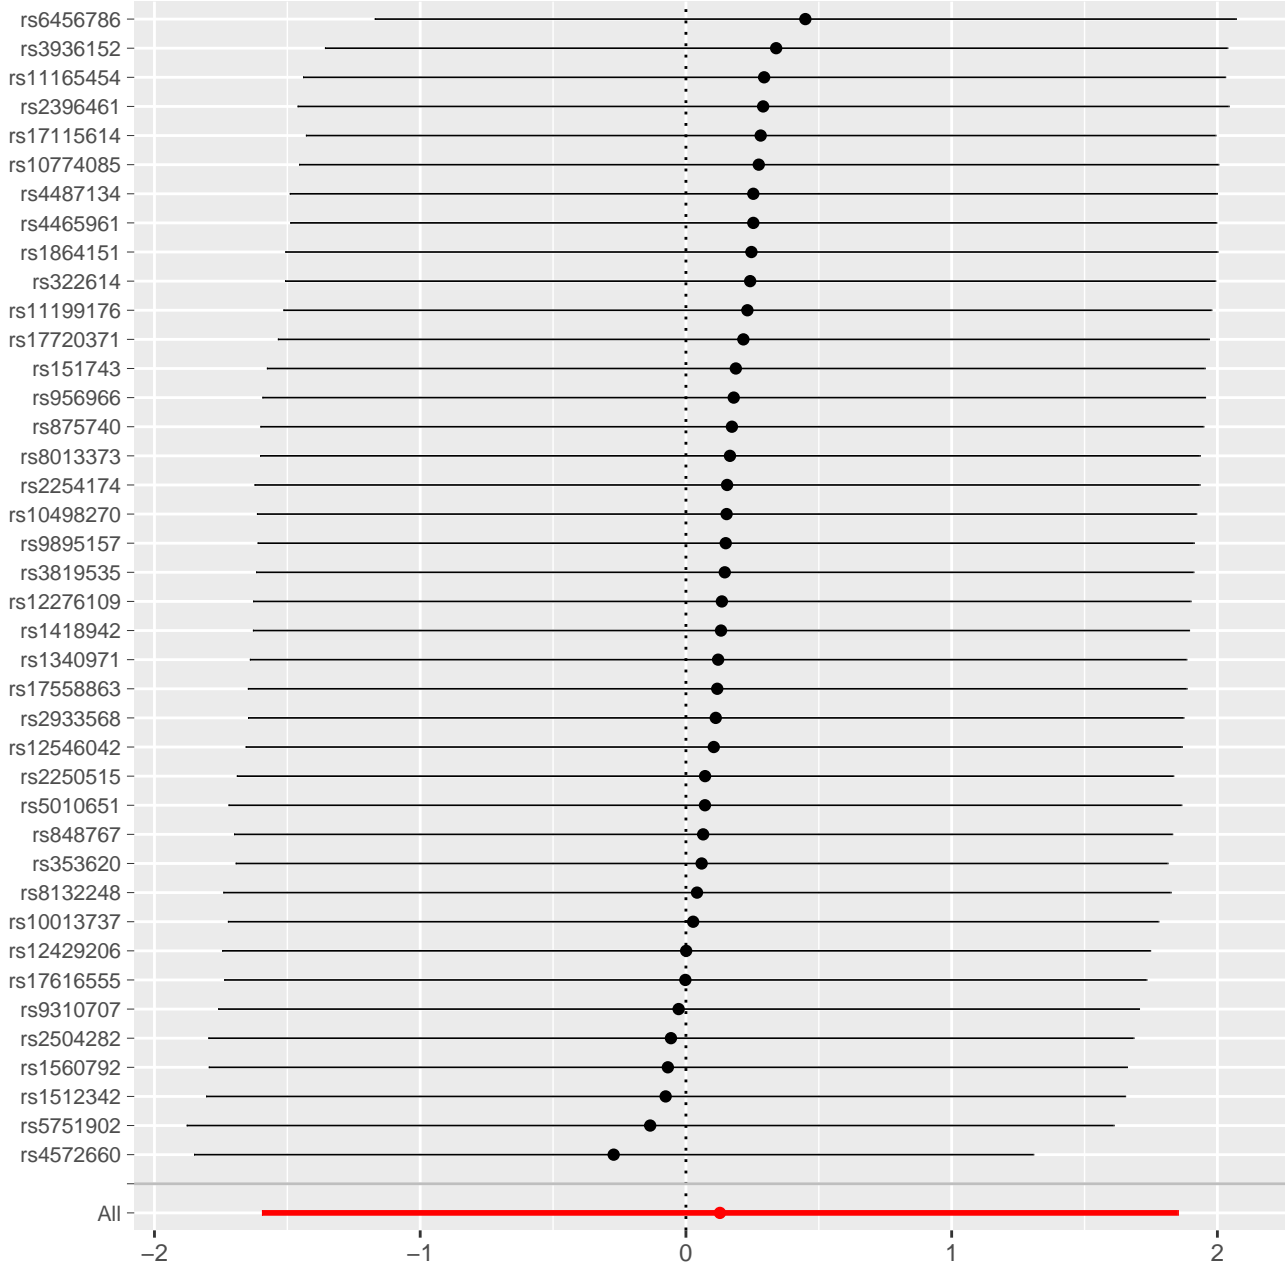

MR leave-one-out sensitivity analysis for 'M02734.metal.pos.txt.gz' on 'JUVEN\_ARTHR.gz'

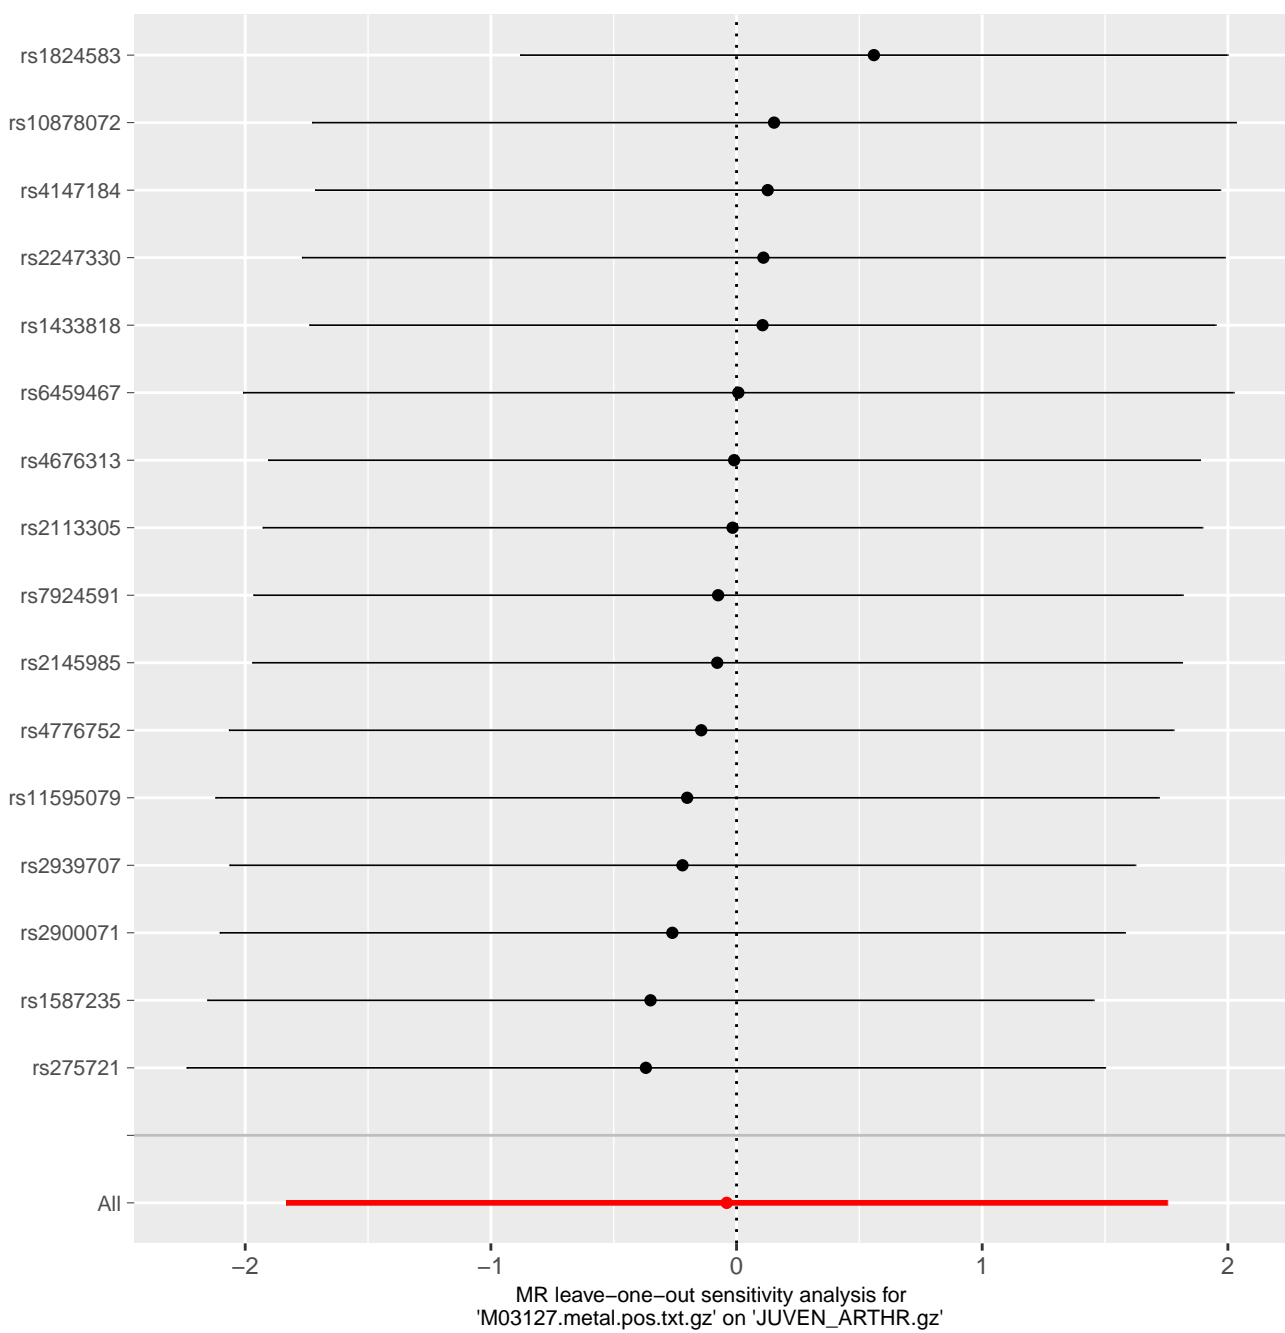

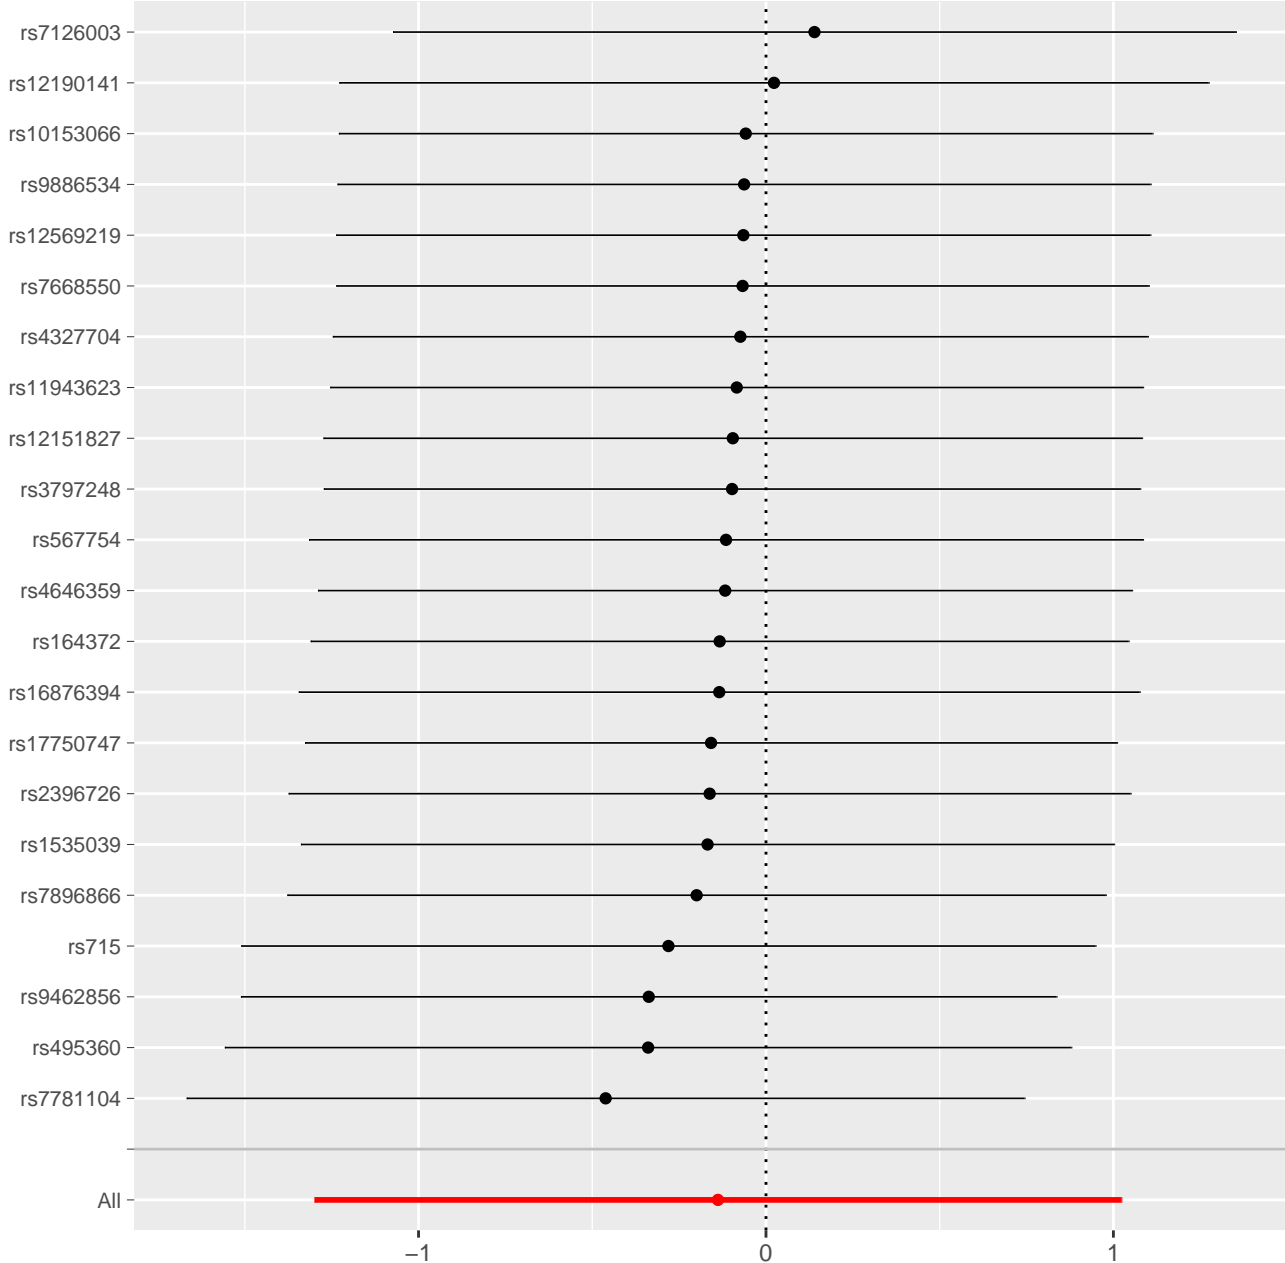

MR leave-one-out sensitivity analysis for 'M03141.metal.pos.txt.gz' on 'JUVEN\_ARTHR.gz'

rs11250123

rs4673167

rs4694292

All

-2.5

0.0

2.5

5.0

7.5

MR leave-one-out sensitivity analysis for  
'M03147.metal.pos.txt.gz' on 'JUVEN\_ARTHR.gz'

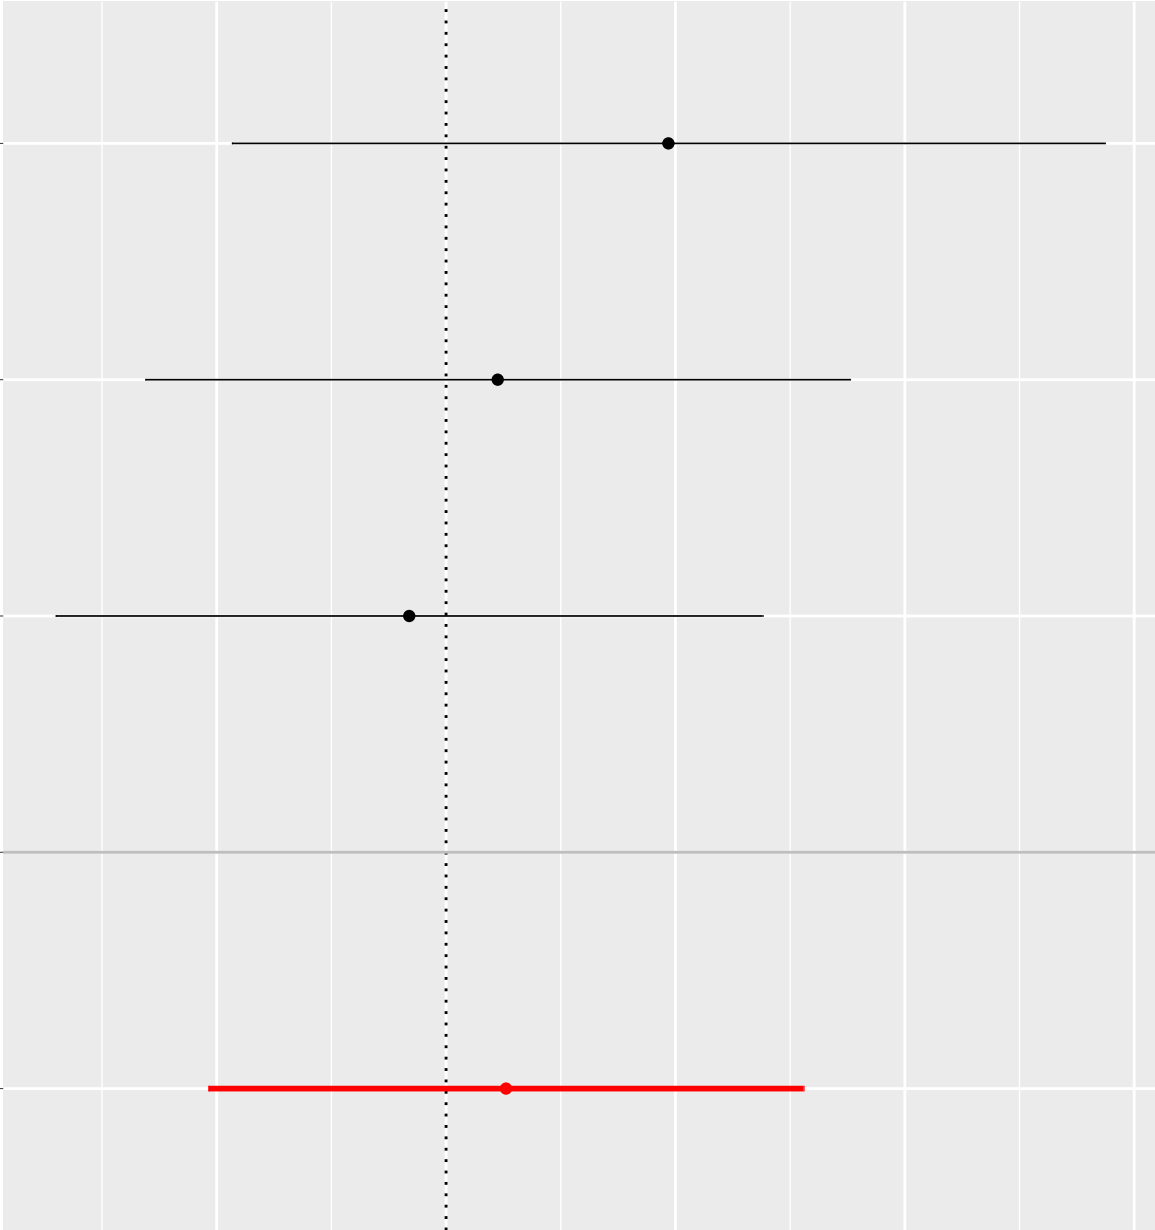



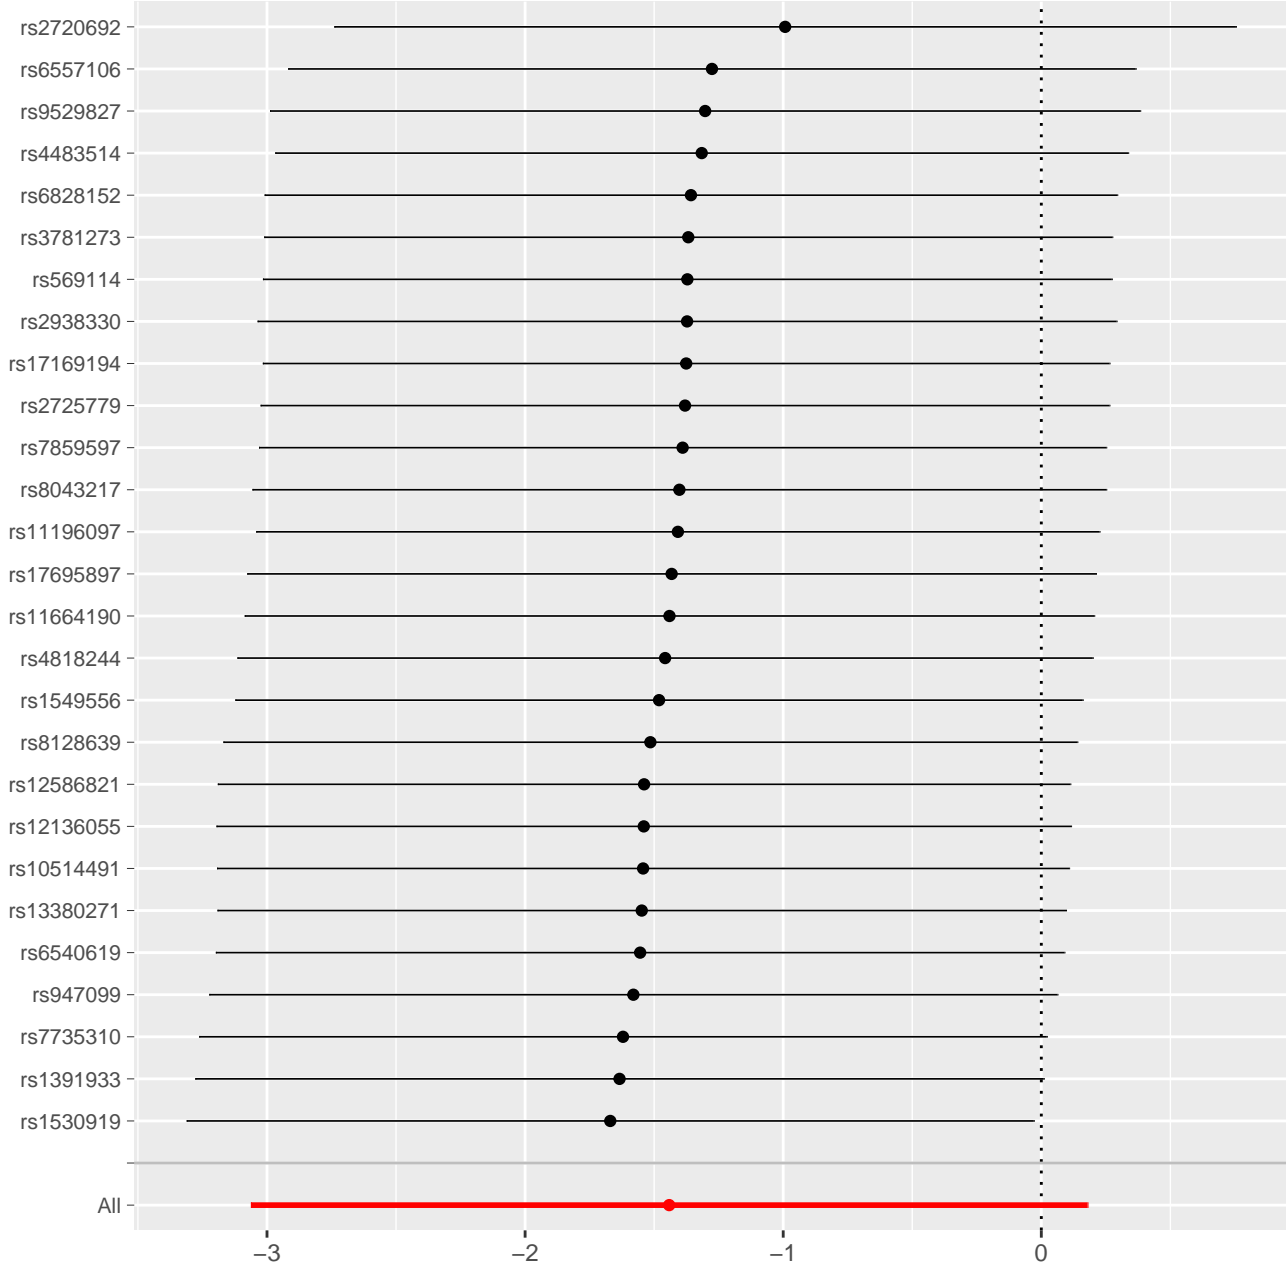

MR leave-one-out sensitivity analysis for 'M10642.metal.pos.txt.gz' on 'JUVEN\_ARTHR.gz'

rs1466522

rs4641759

rs10404980

rs6126354

All

-5

0

5

MR leave-one-out sensitivity analysis for  
'M11438.metal.pos.txt.gz' on 'JUVEN\_ARTHR.gz'

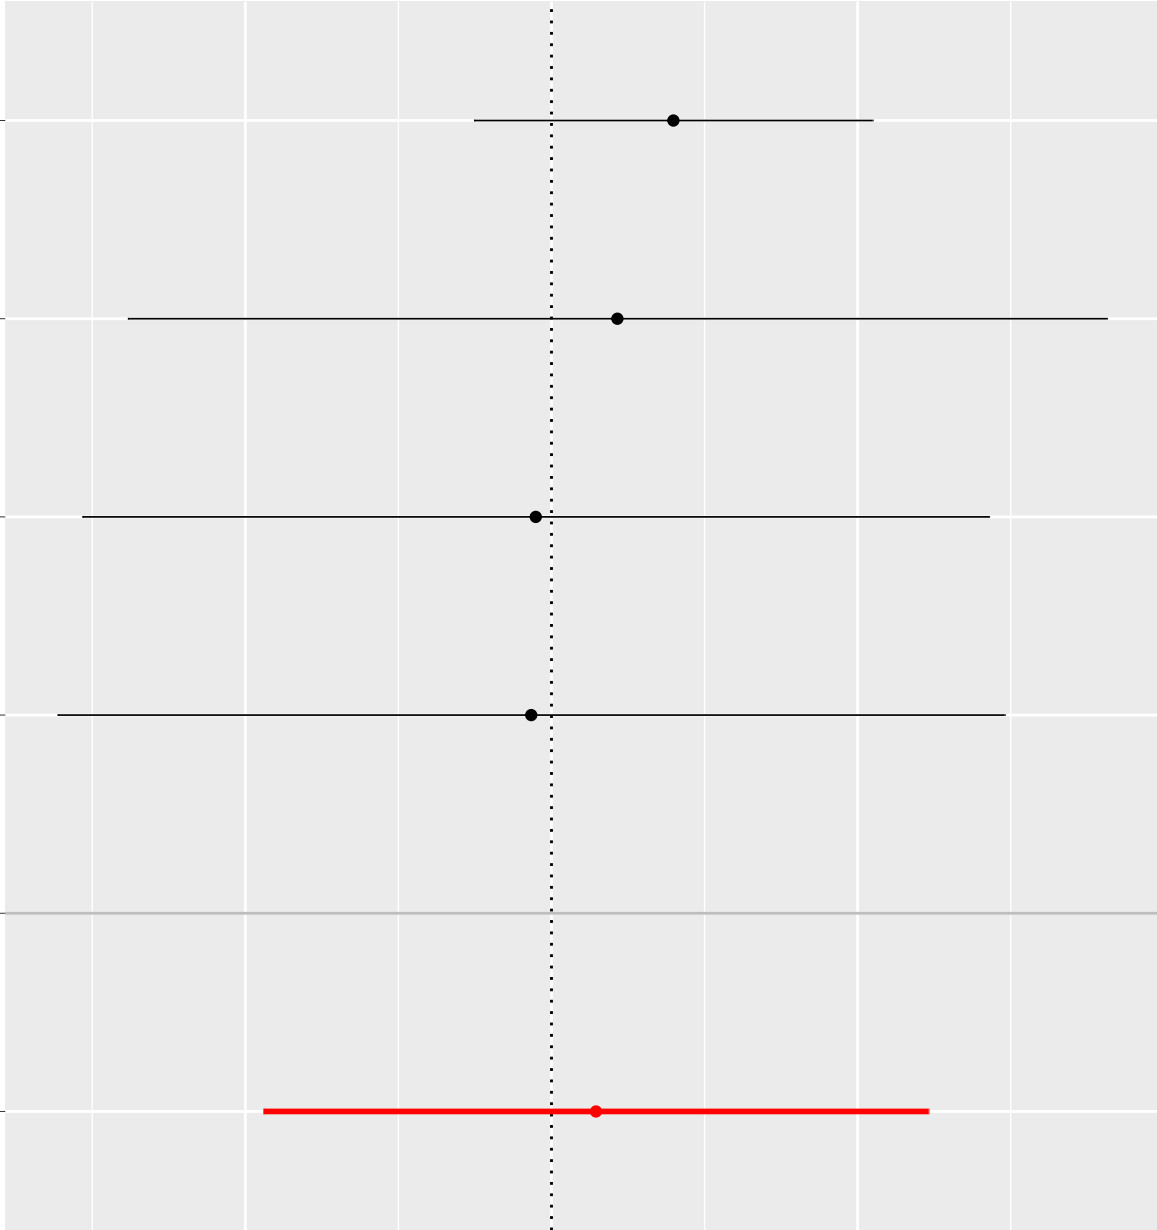

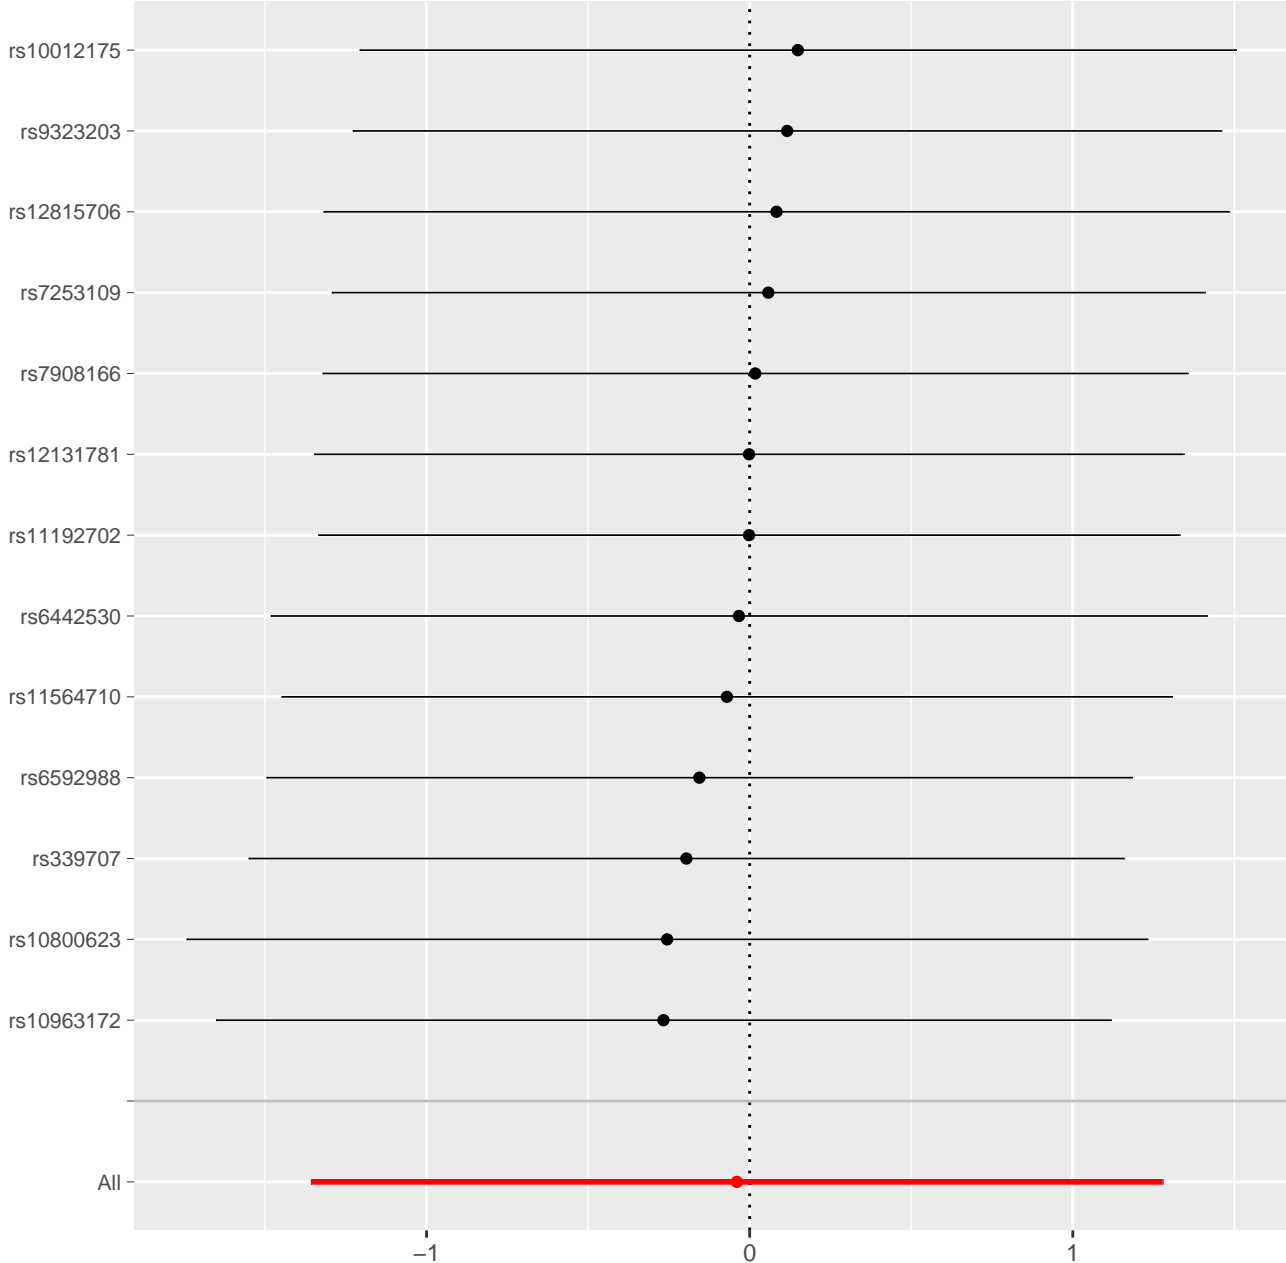

MR leave-one-out sensitivity analysis for 'M12017.metal.pos.txt.gz' on 'JUVEN\_ARTHR.gz'

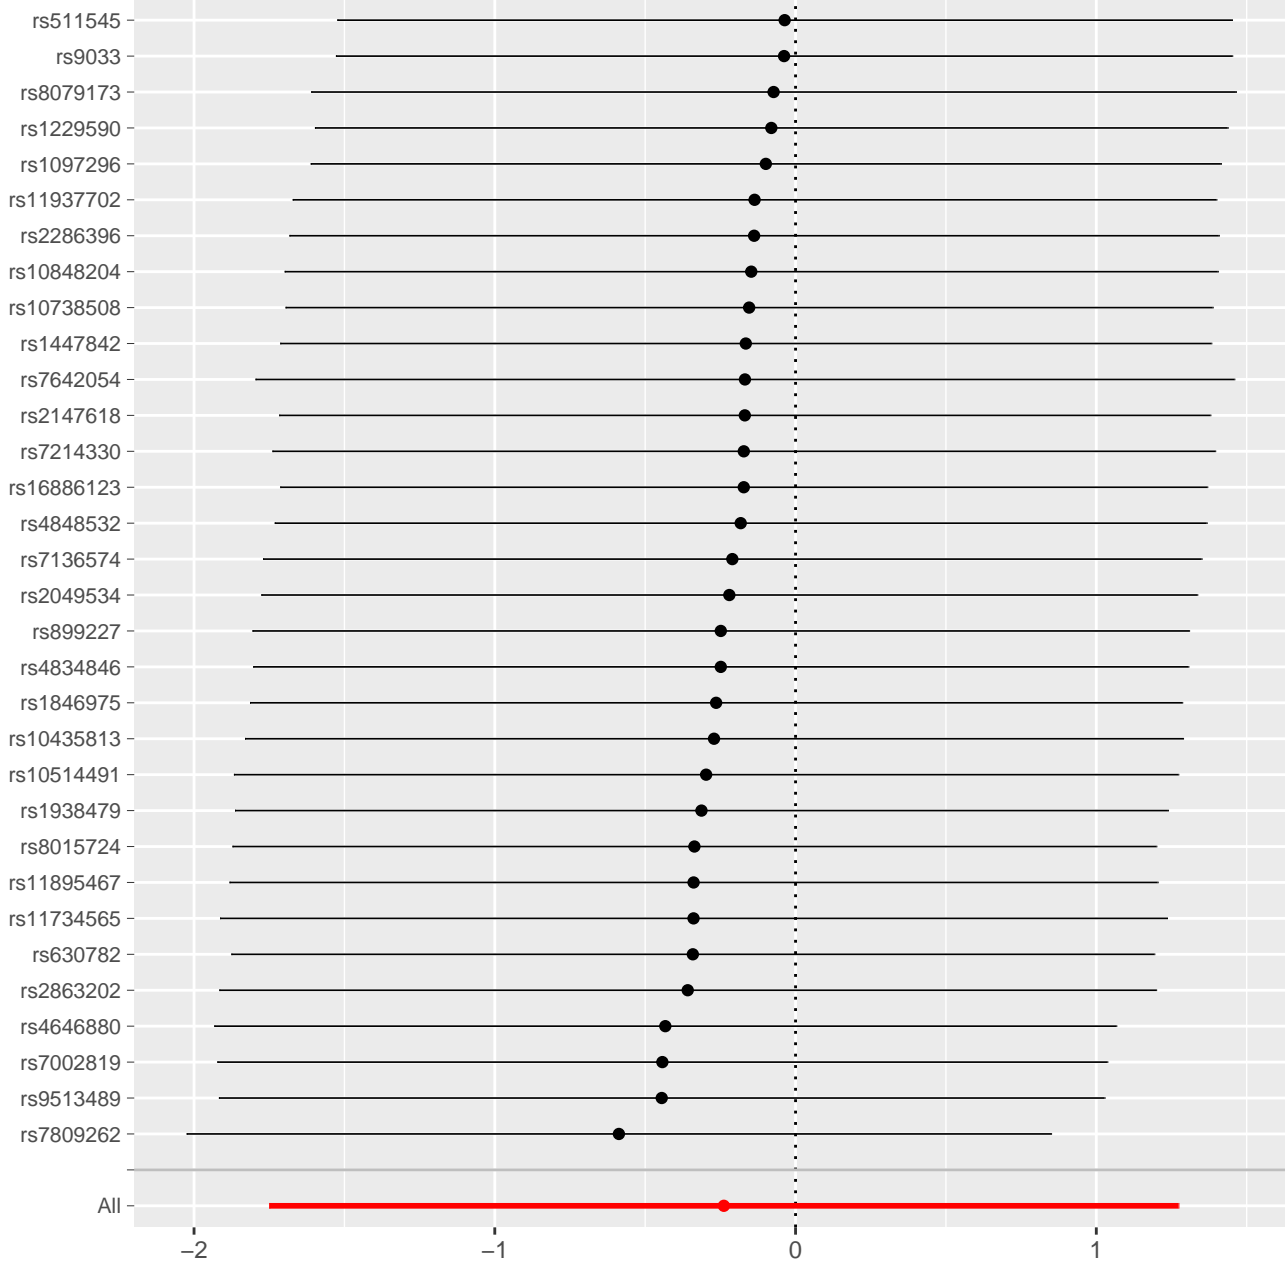

MR leave-one-out sensitivity analysis for 'M12035.metal.pos.txt.gz' on 'JUVEN\_ARTHR.gz'

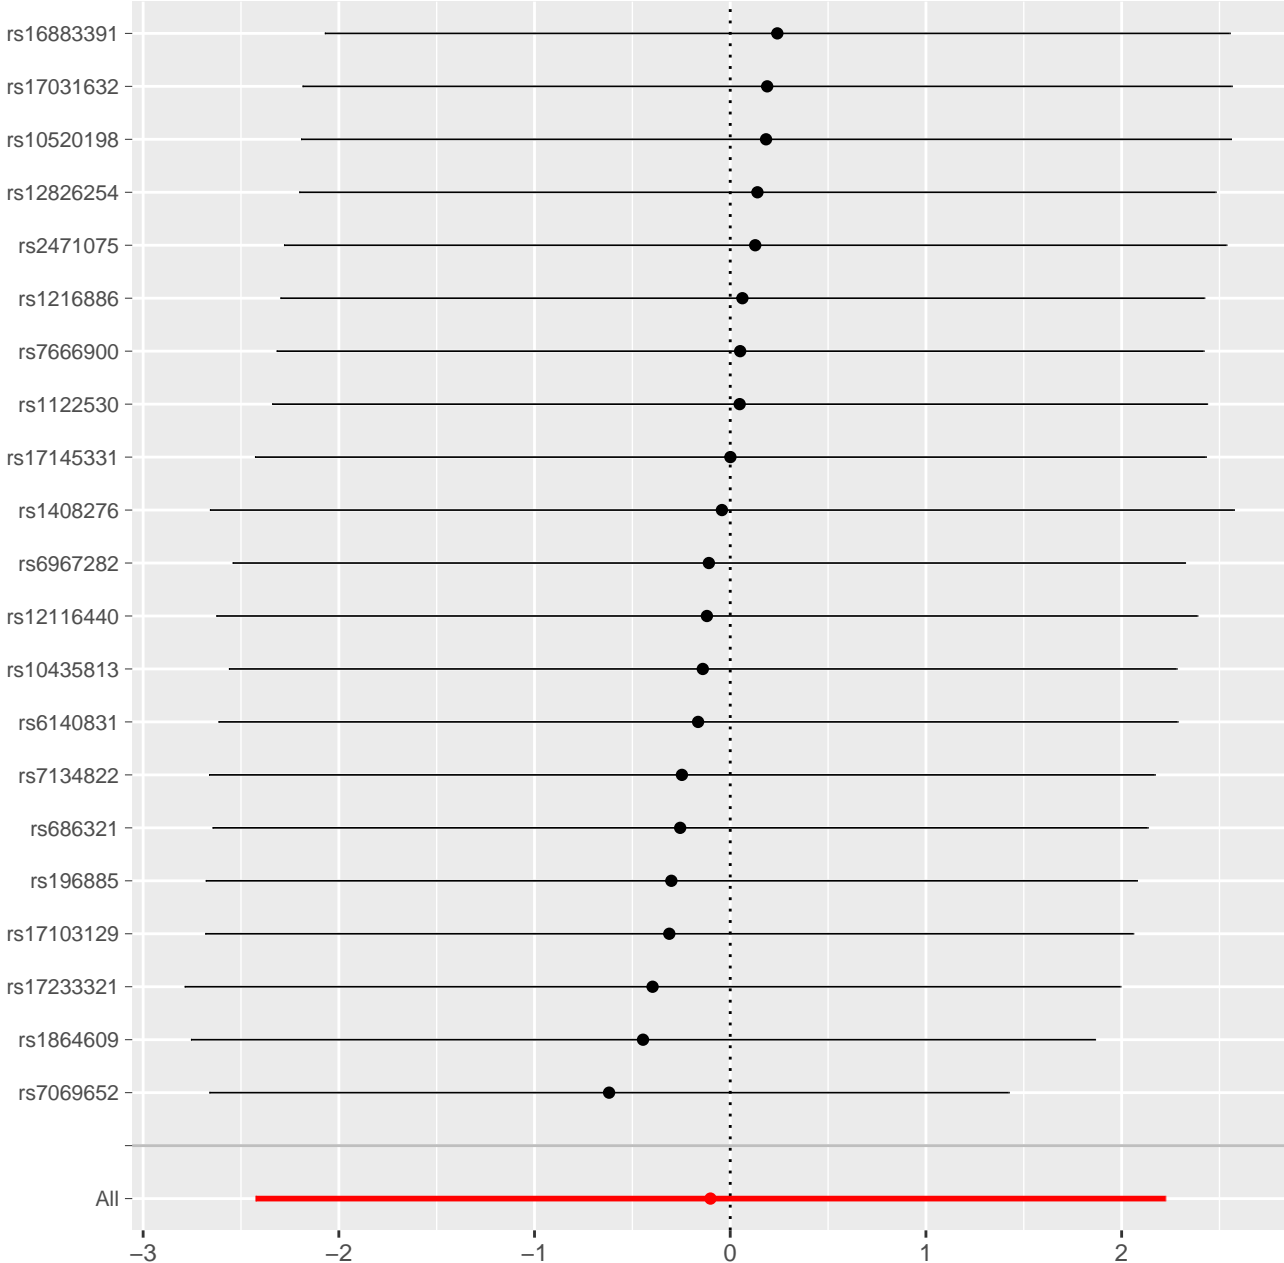

MR leave-one-out sensitivity analysis for 'M12067.metal.pos.txt.gz' on 'JUVEN\_ARTHR.gz'

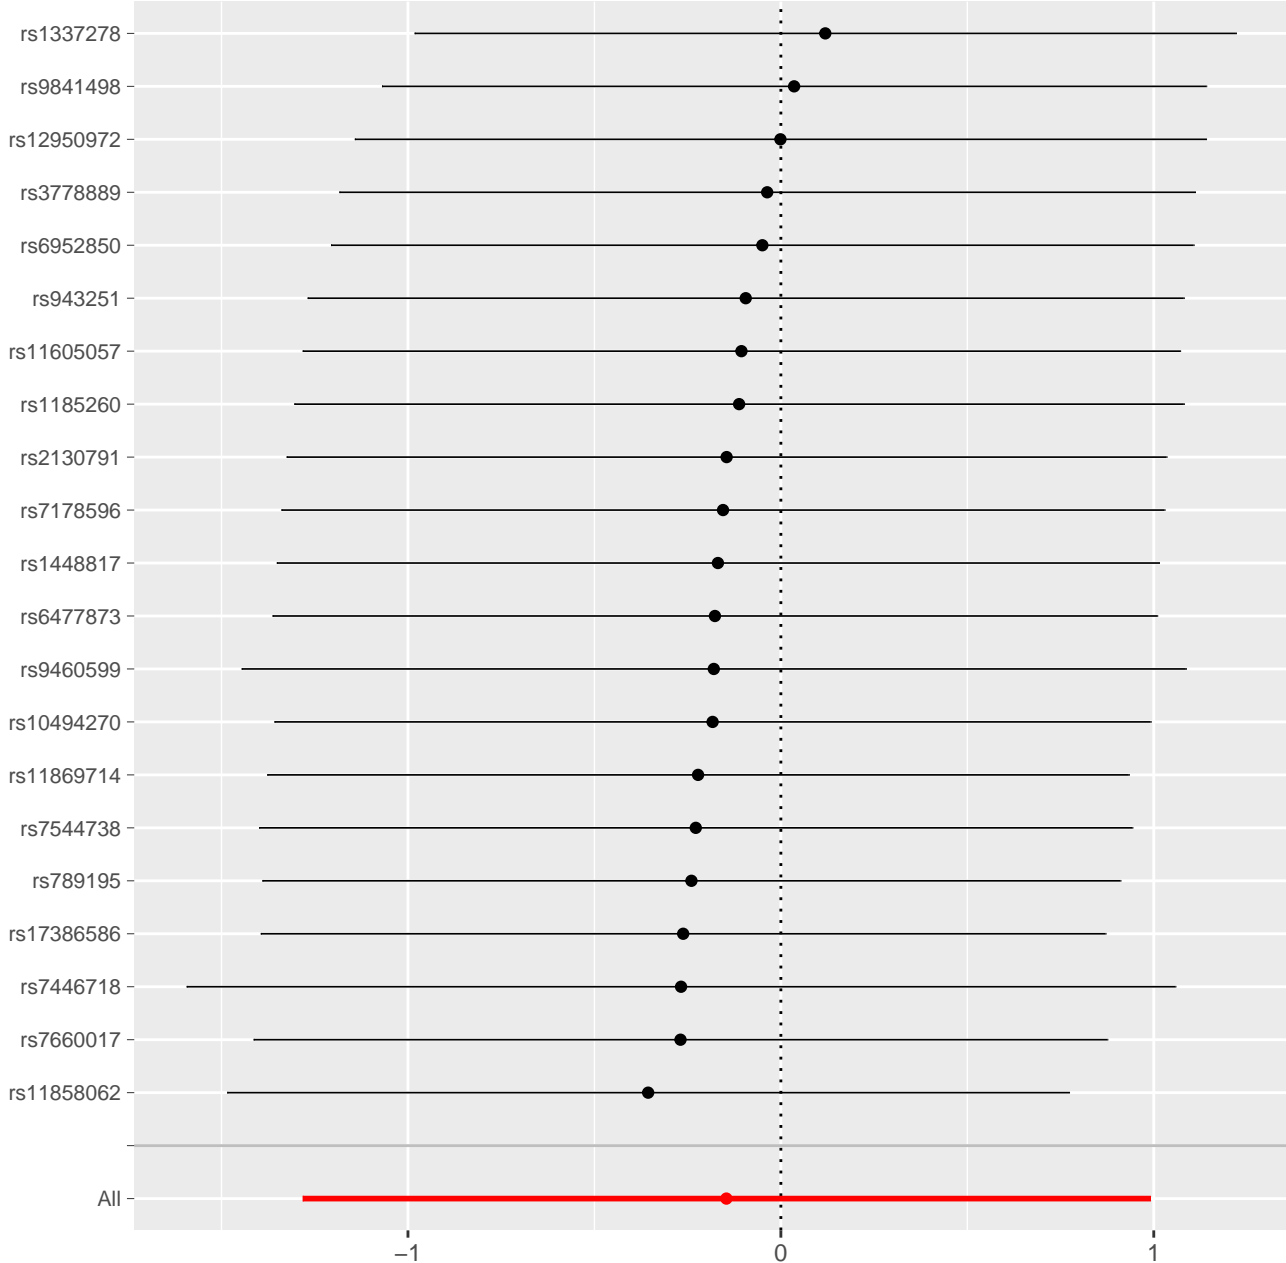

MR leave-one-out sensitivity analysis for 'M12129.metal.pos.txt.gz' on 'JUVEN\_ARTHR.gz'

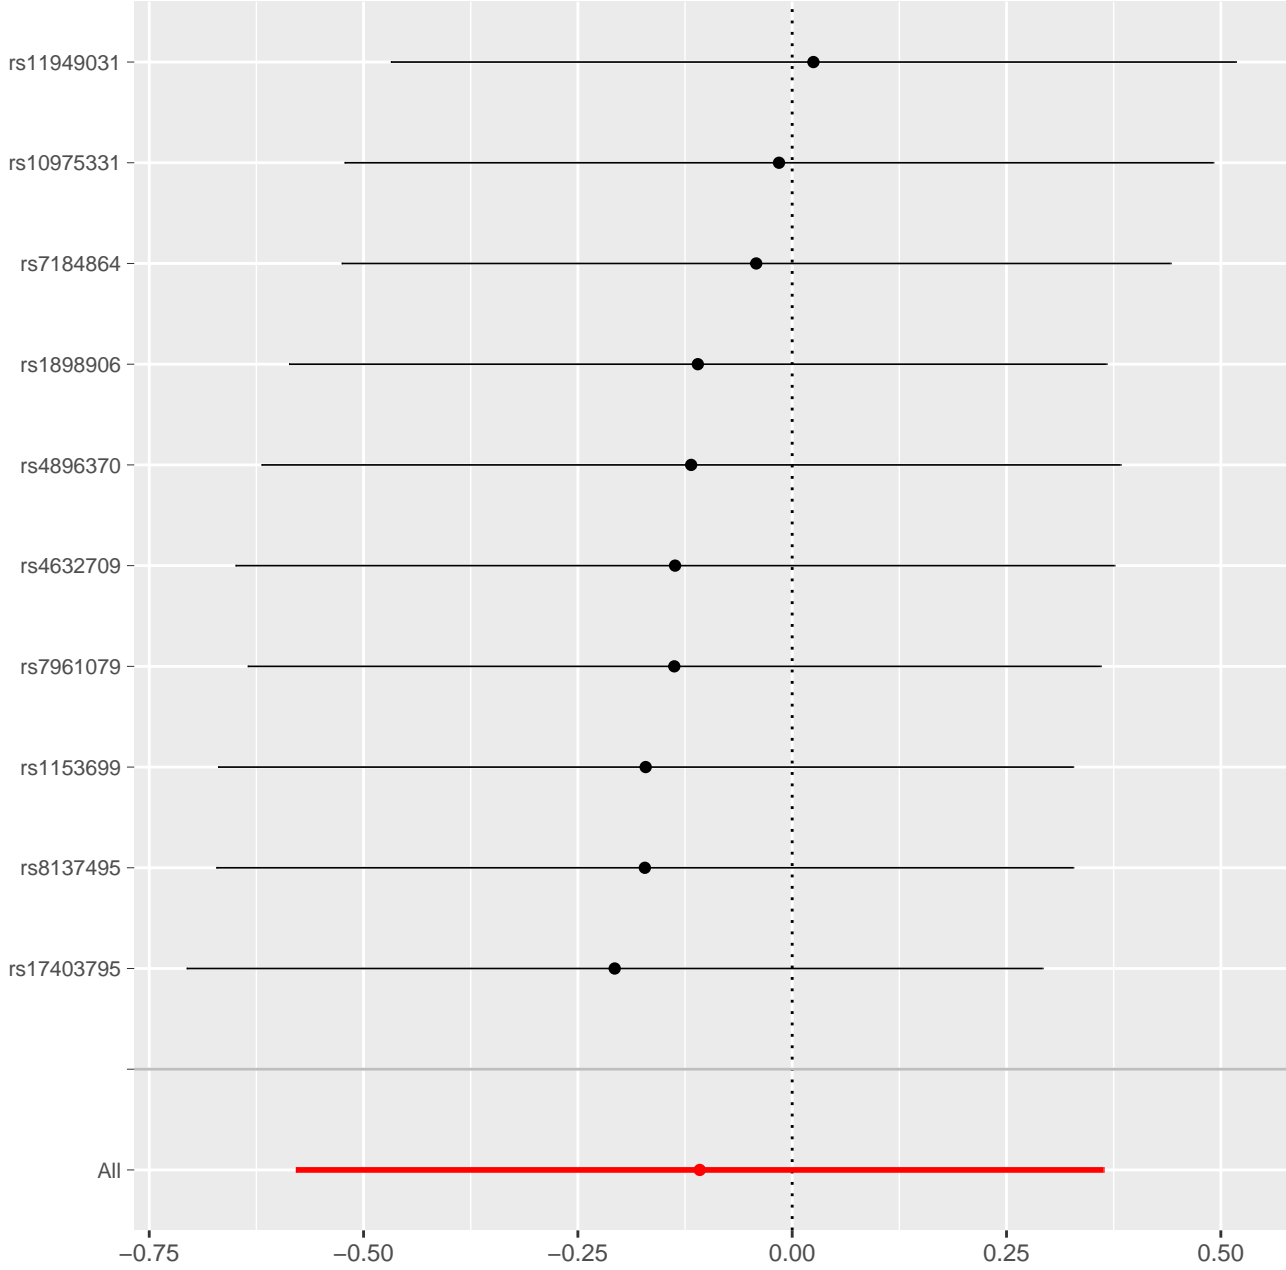

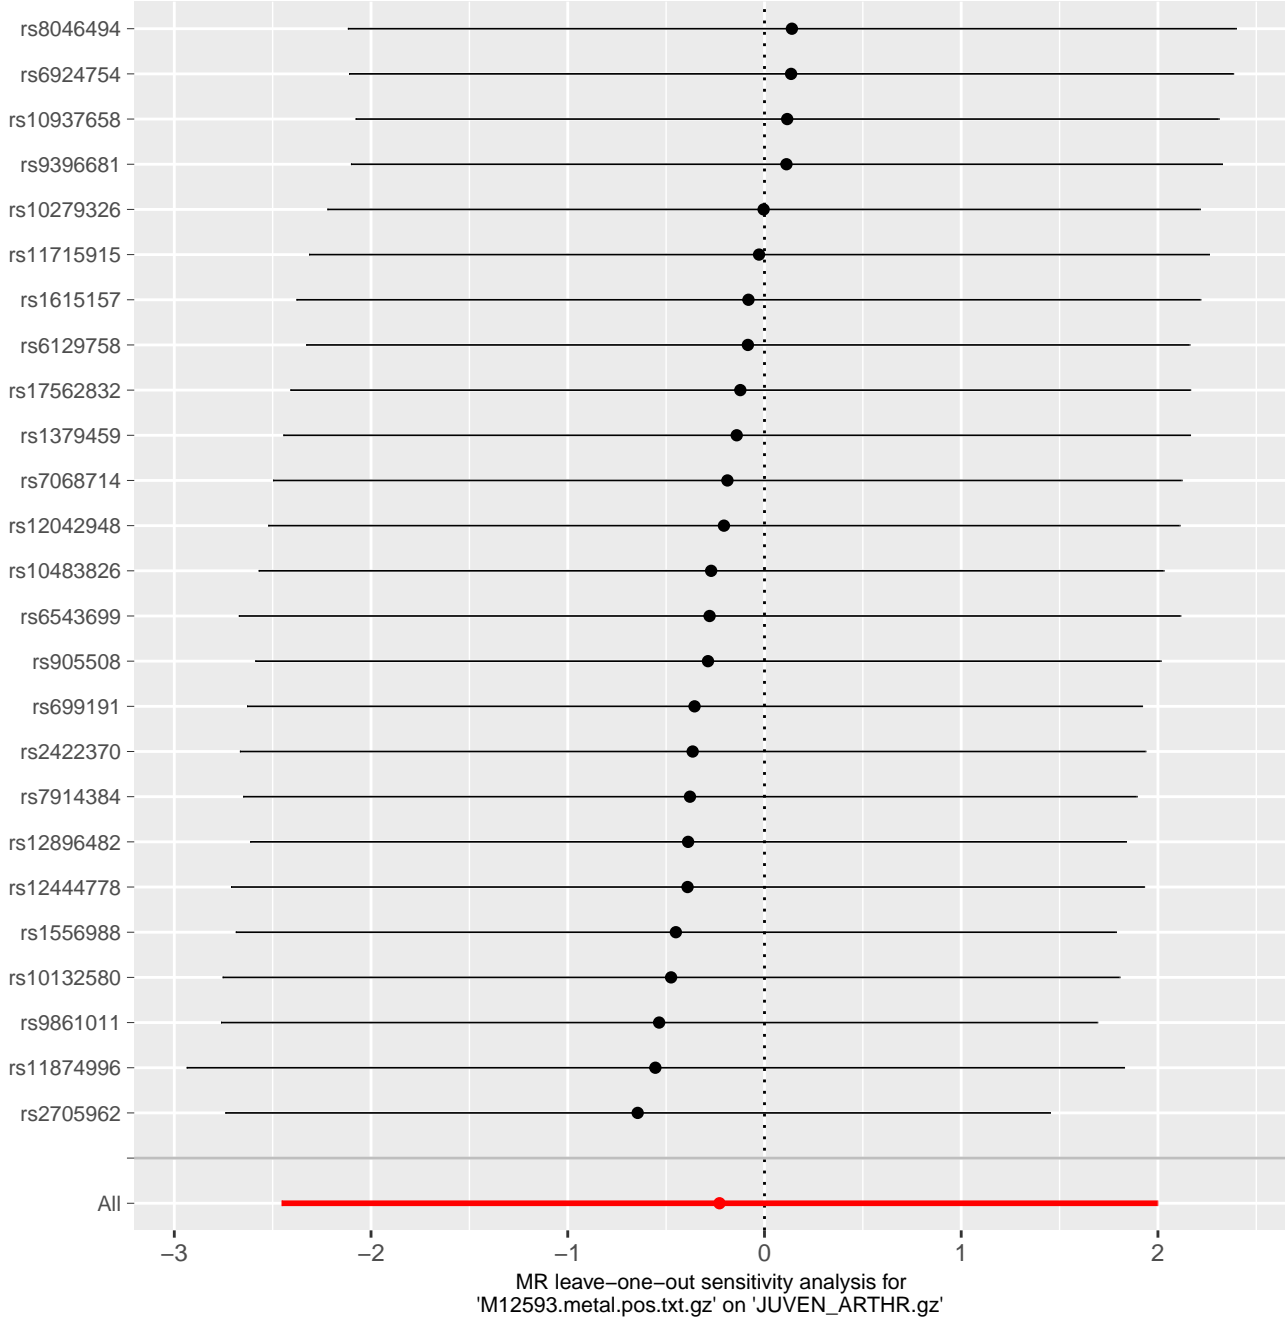



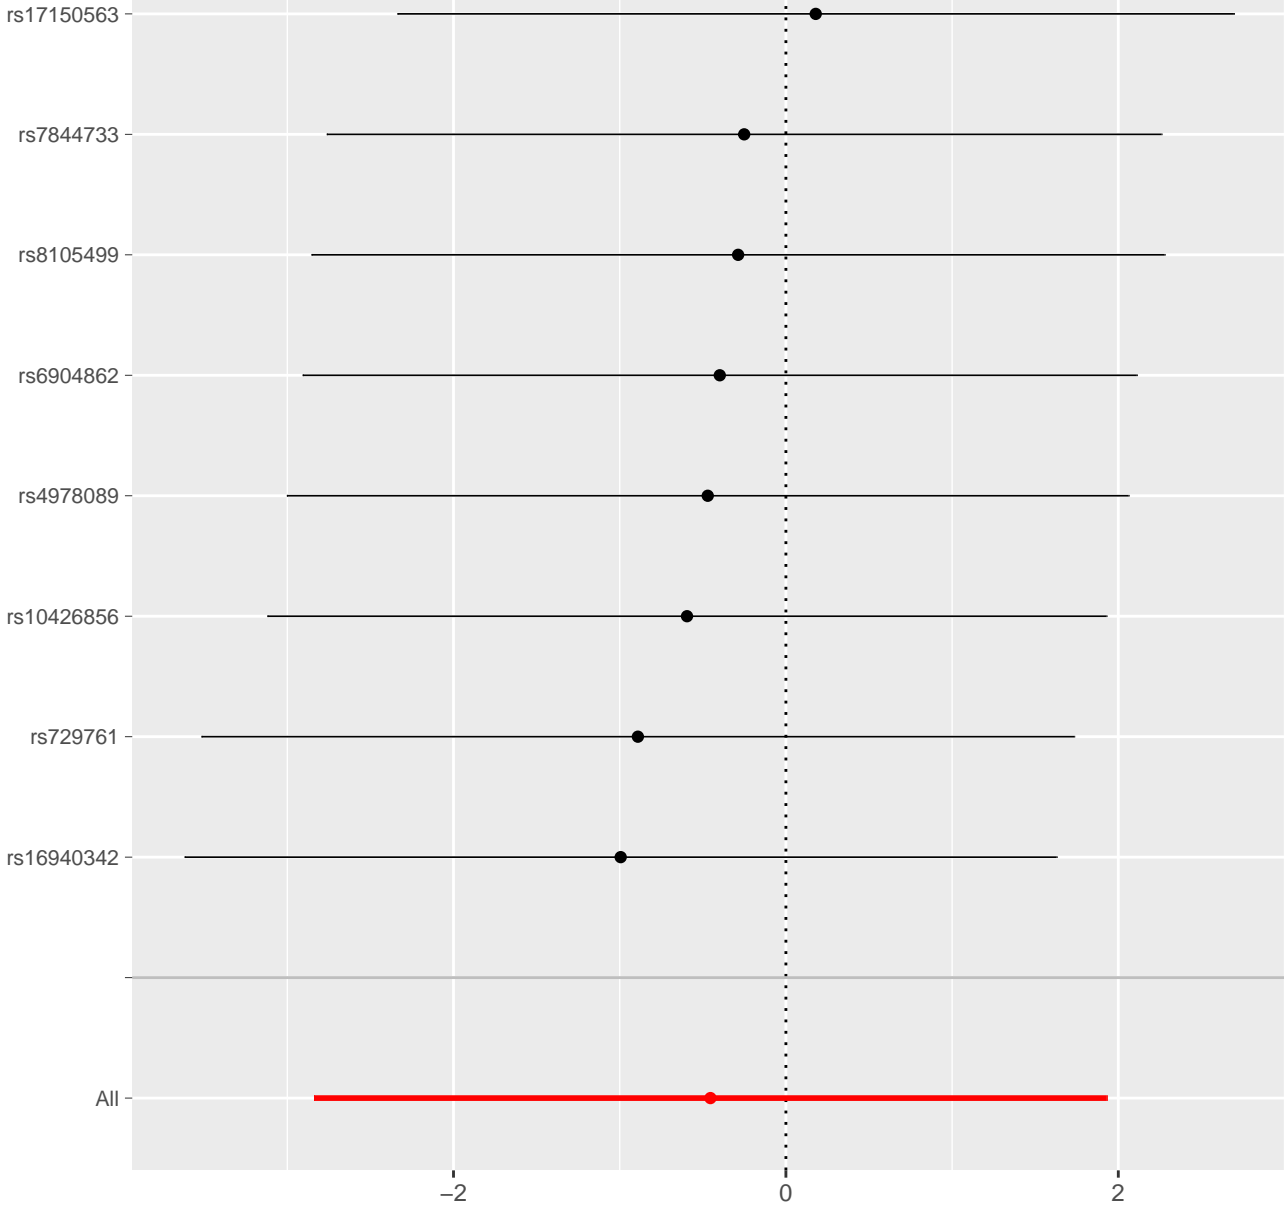

MR leave-one-out sensitivity analysis for 'M12626.metal.pos.txt.gz' on 'JUVEN\_ARTHR.gz'

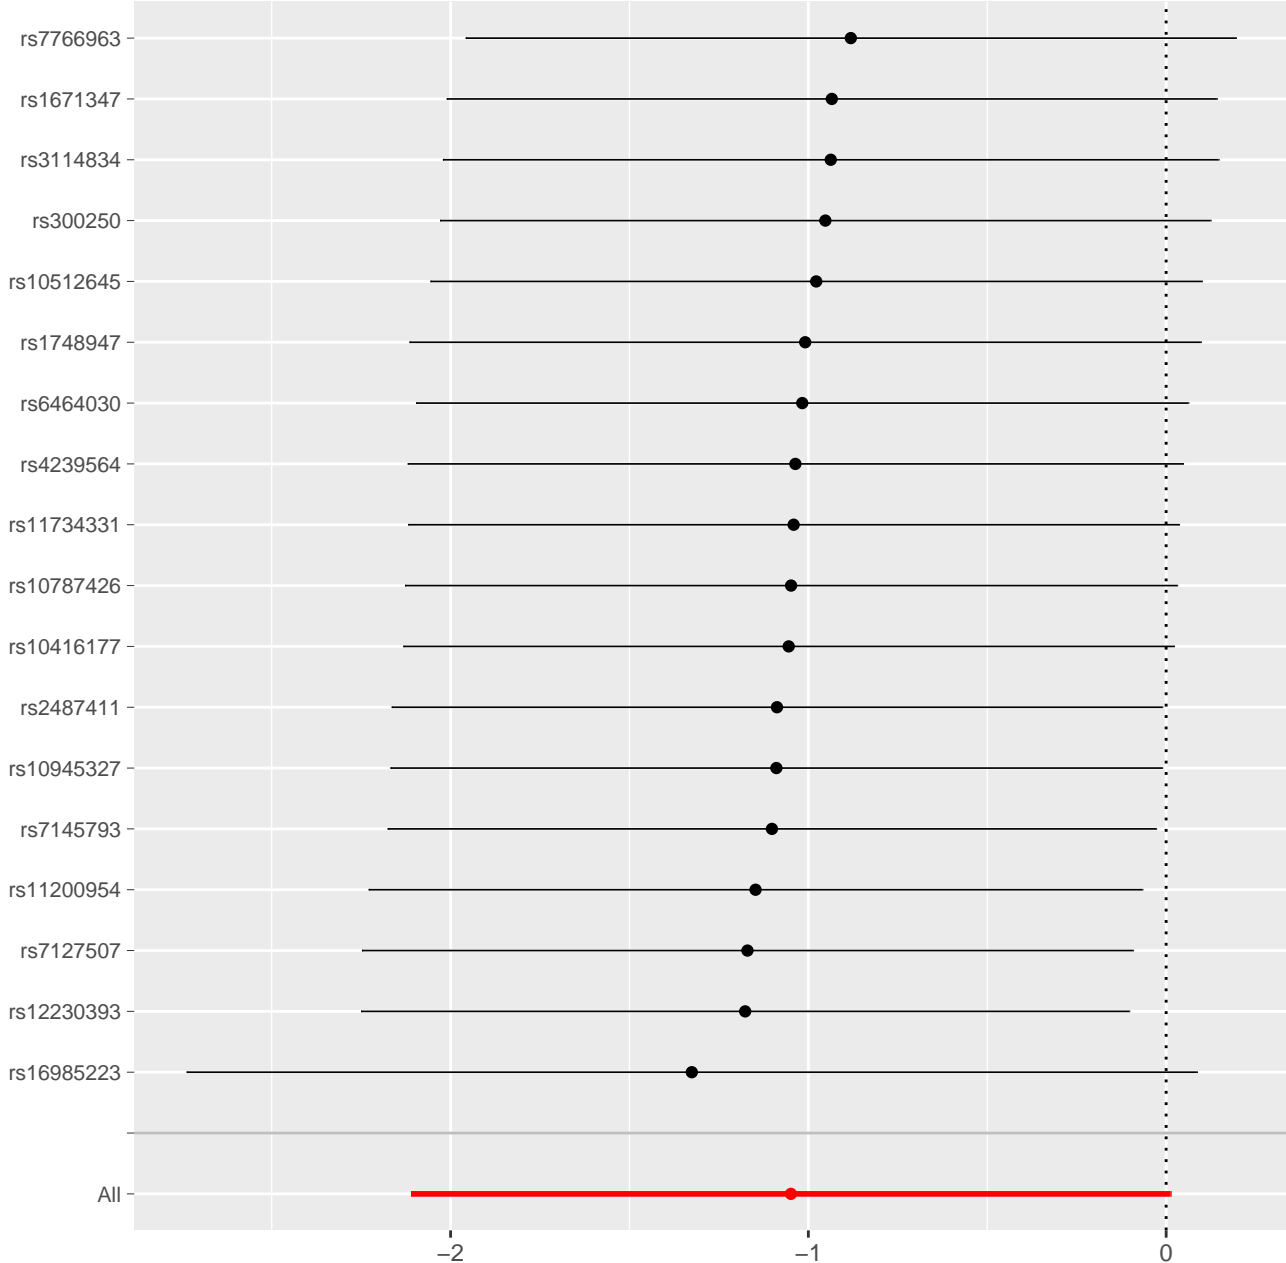

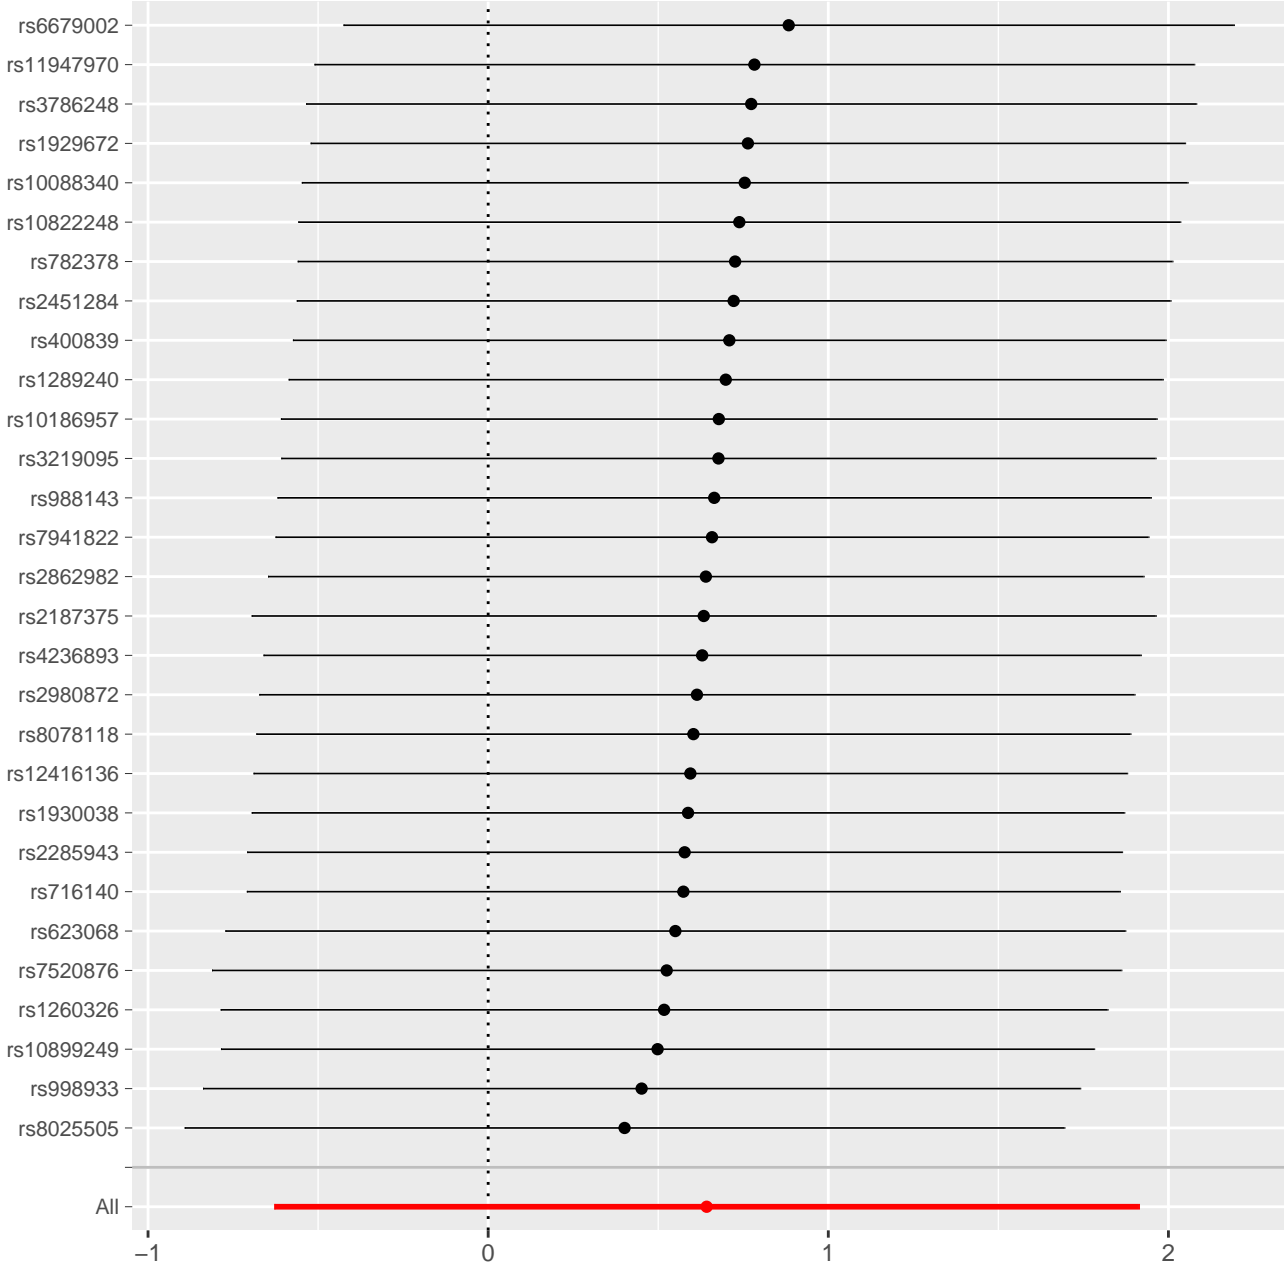

MR leave-one-out sensitivity analysis for 'M12774.metal.pos.txt.gz' on 'JUVEN\_ARTHR.gz'

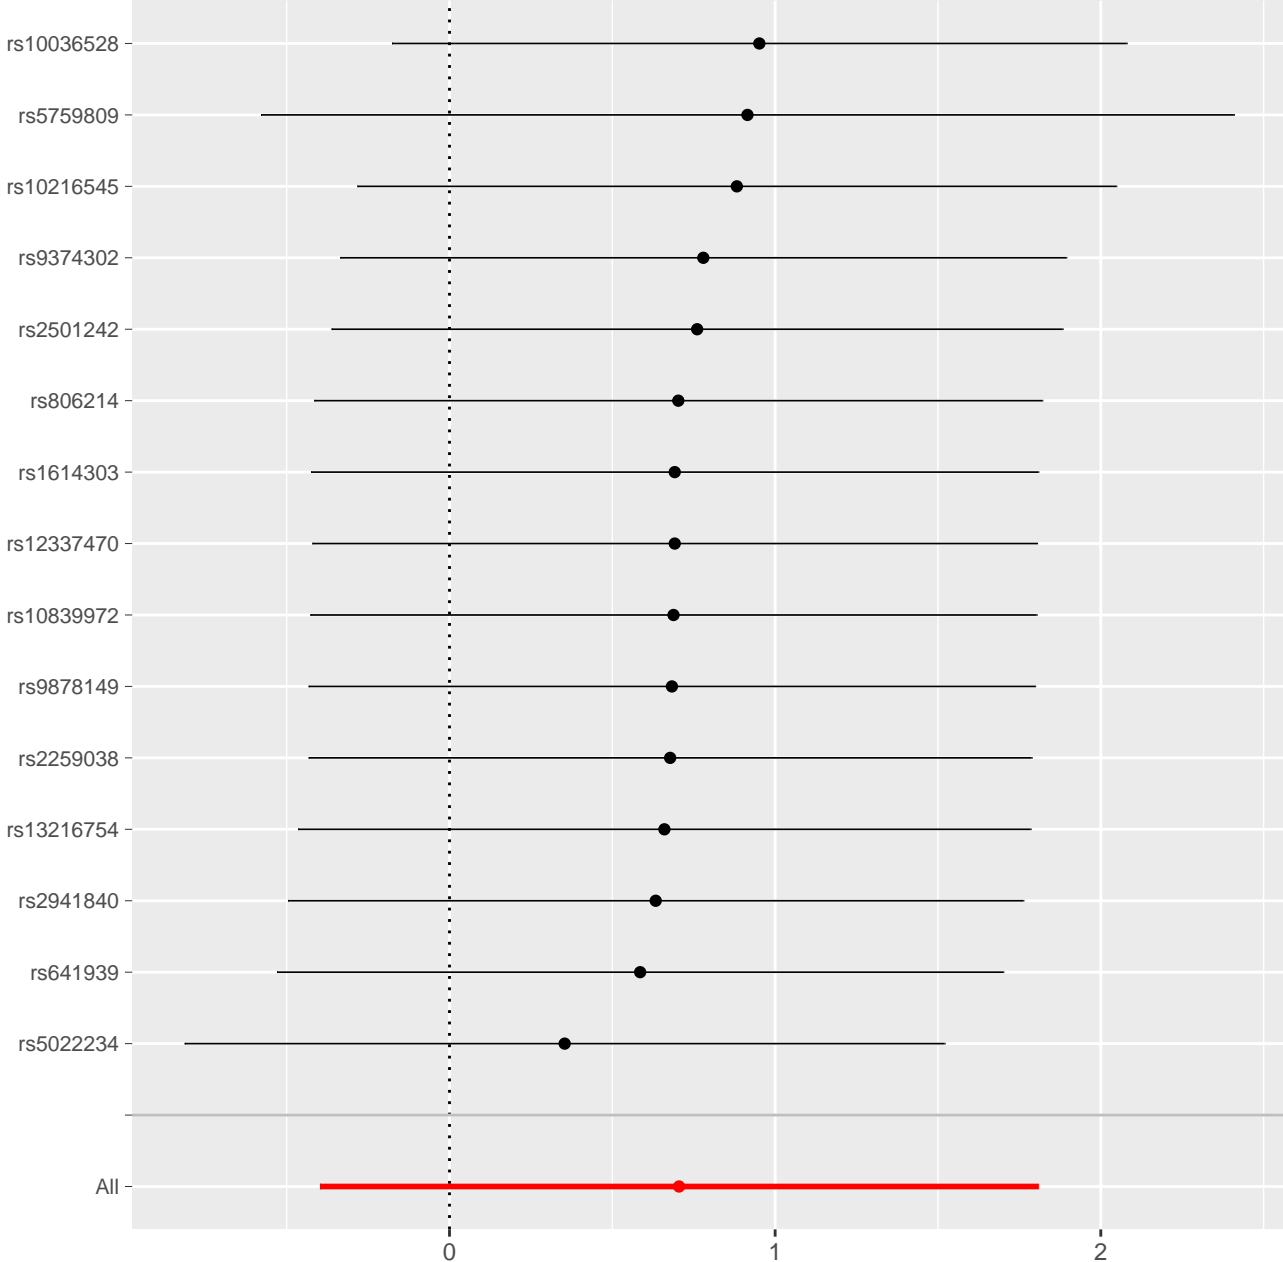

MR leave-one-out sensitivity analysis for 'M15122.metal.pos.txt.gz' on 'JUVEN\_ARTHR.gz'

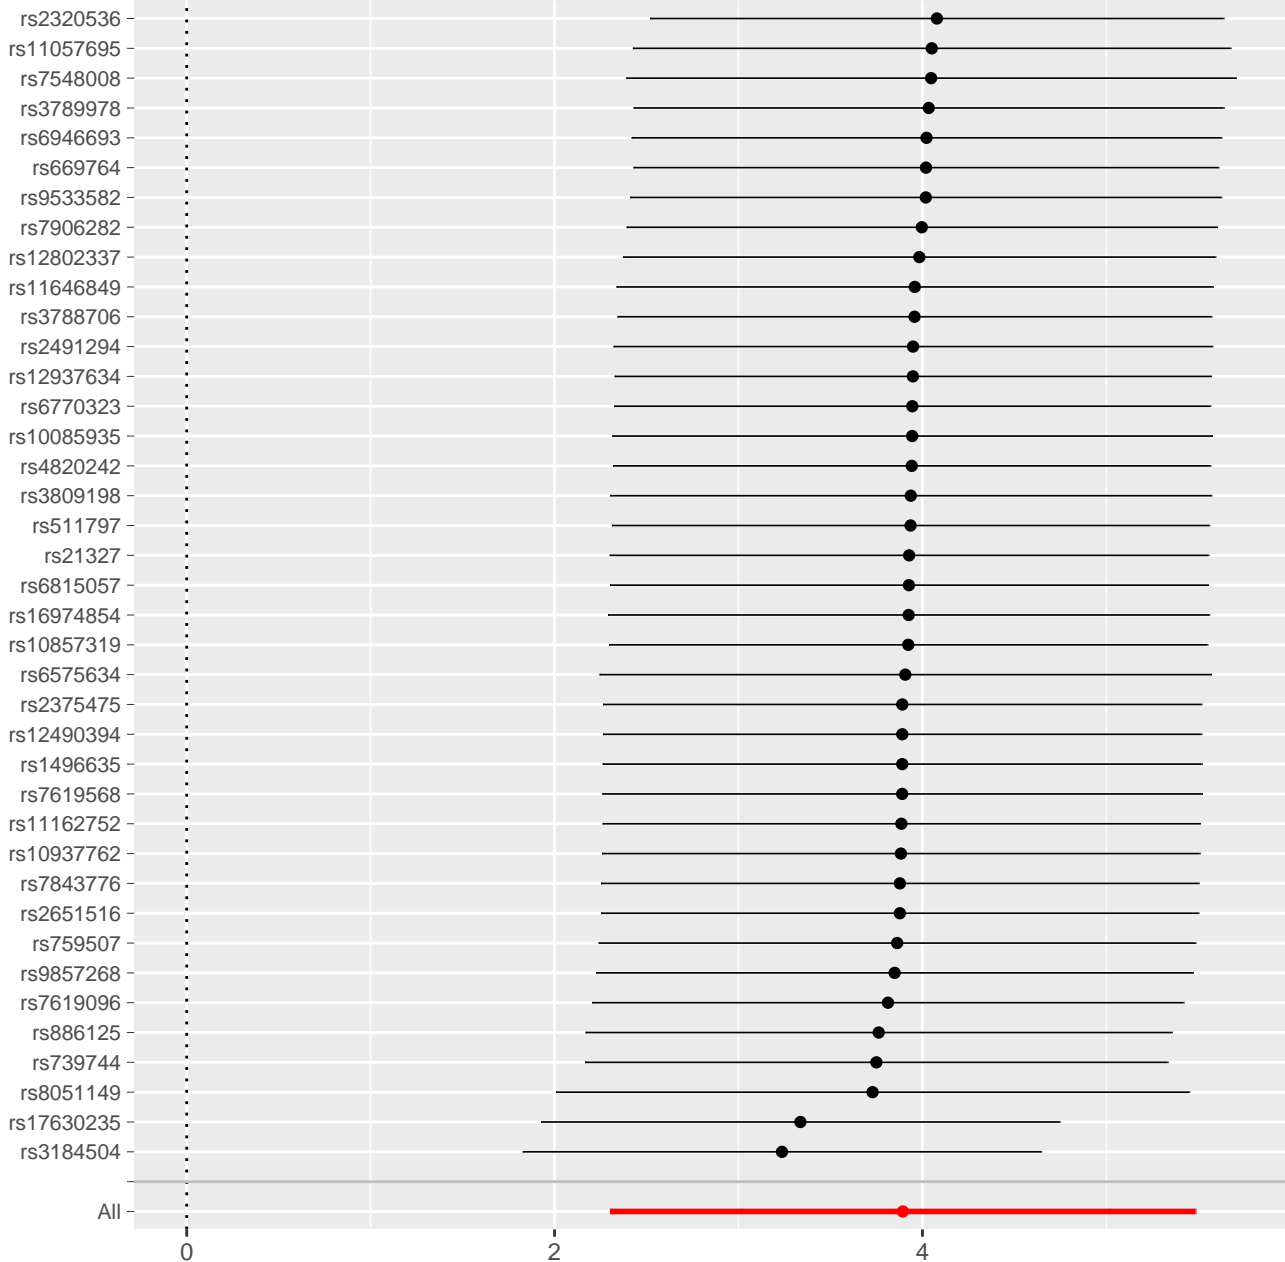

MR leave-one-out sensitivity analysis for 'M15140.metal.pos.txt.gz' on 'JUVEN\_ARTHR.gz'

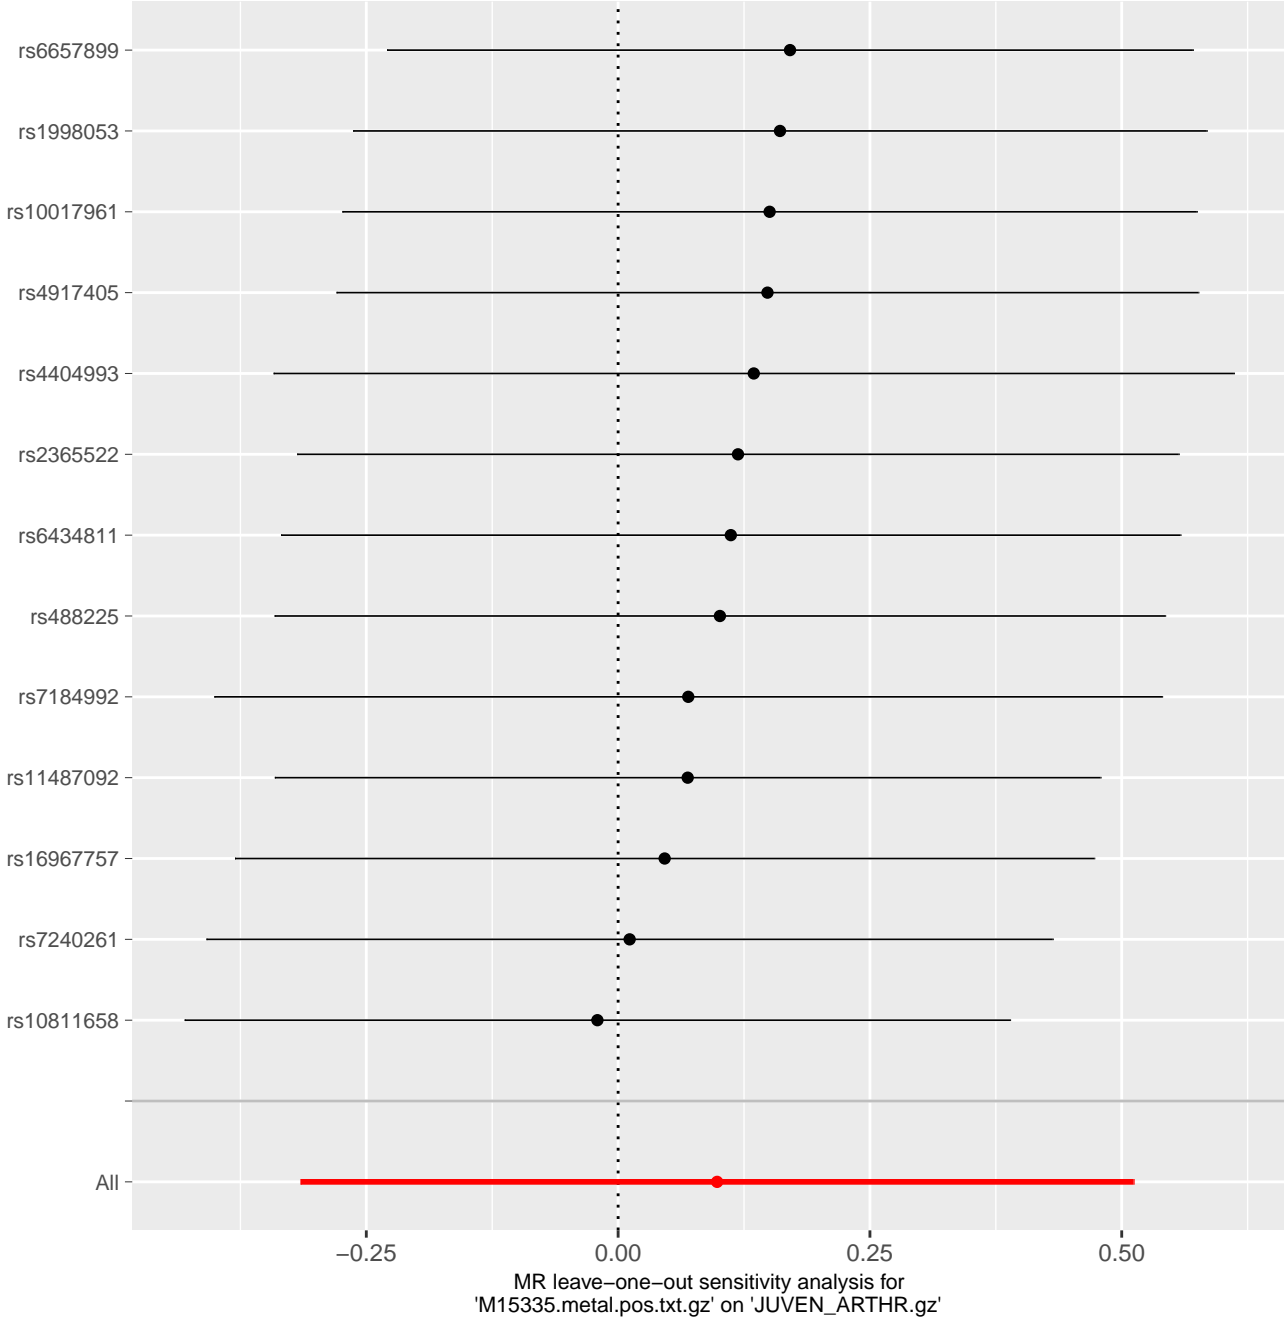

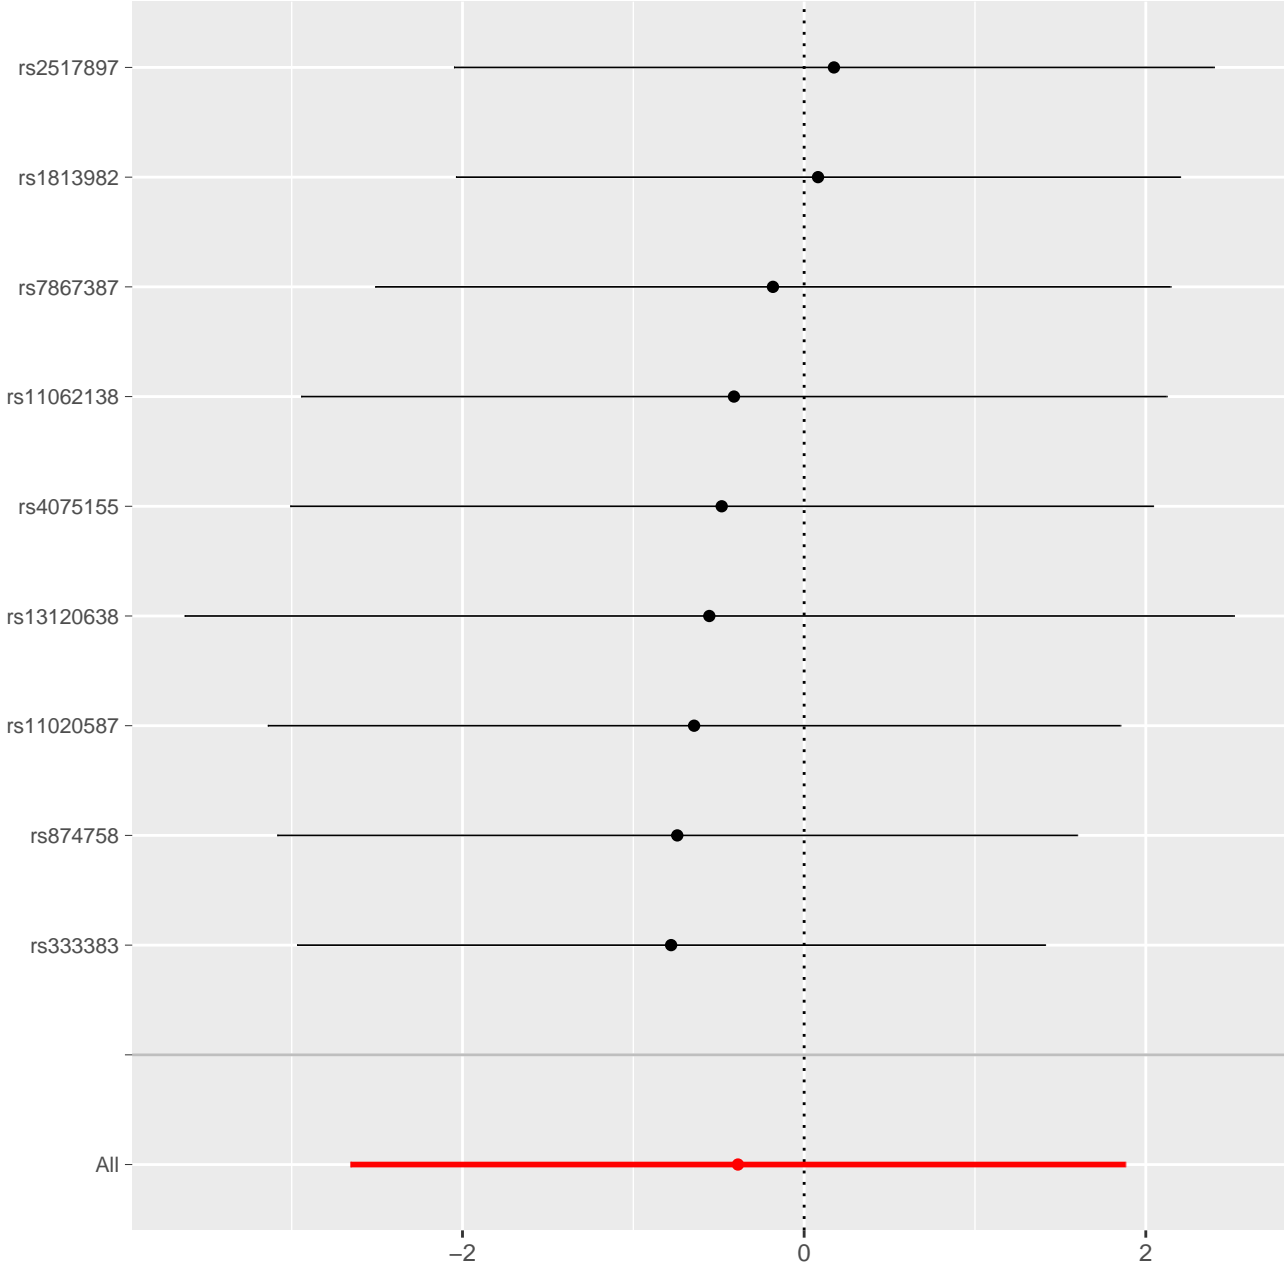

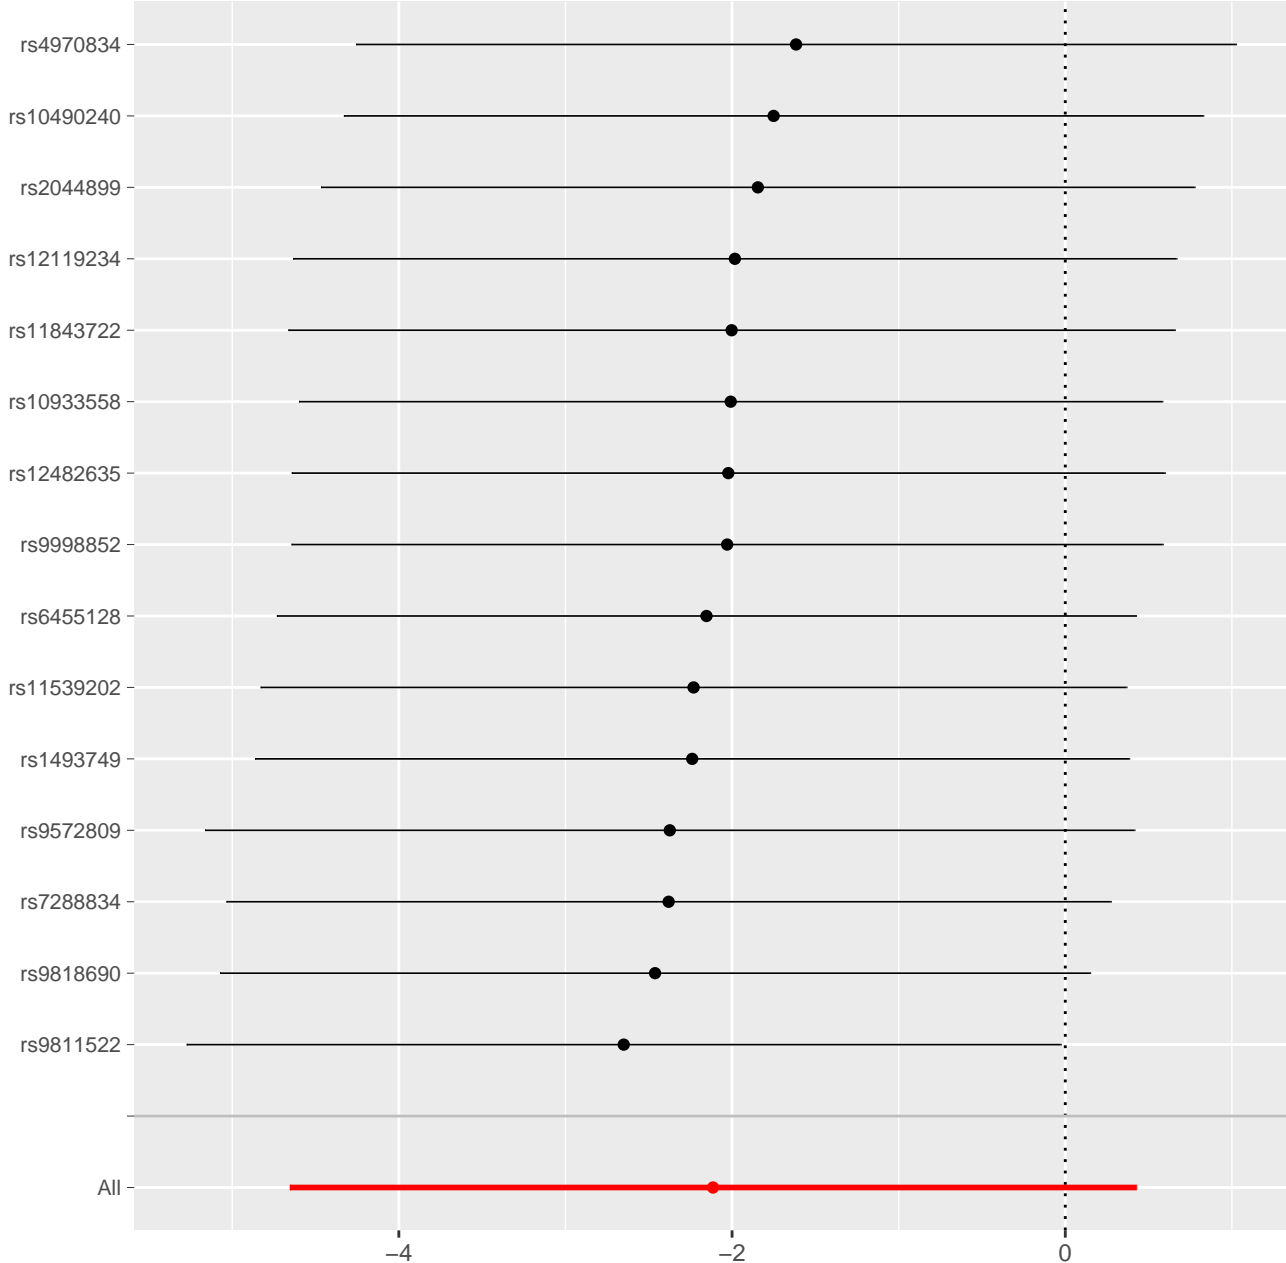

MR leave-one-out sensitivity analysis for 'M15488.metal.pos.txt.gz' on 'JUVEN\_ARTHR.gz'



MR leave-one-out sensitivity analysis for  
'M15500.metal.pos.txt.gz' on 'JUVEN\_ARTHR.gz'

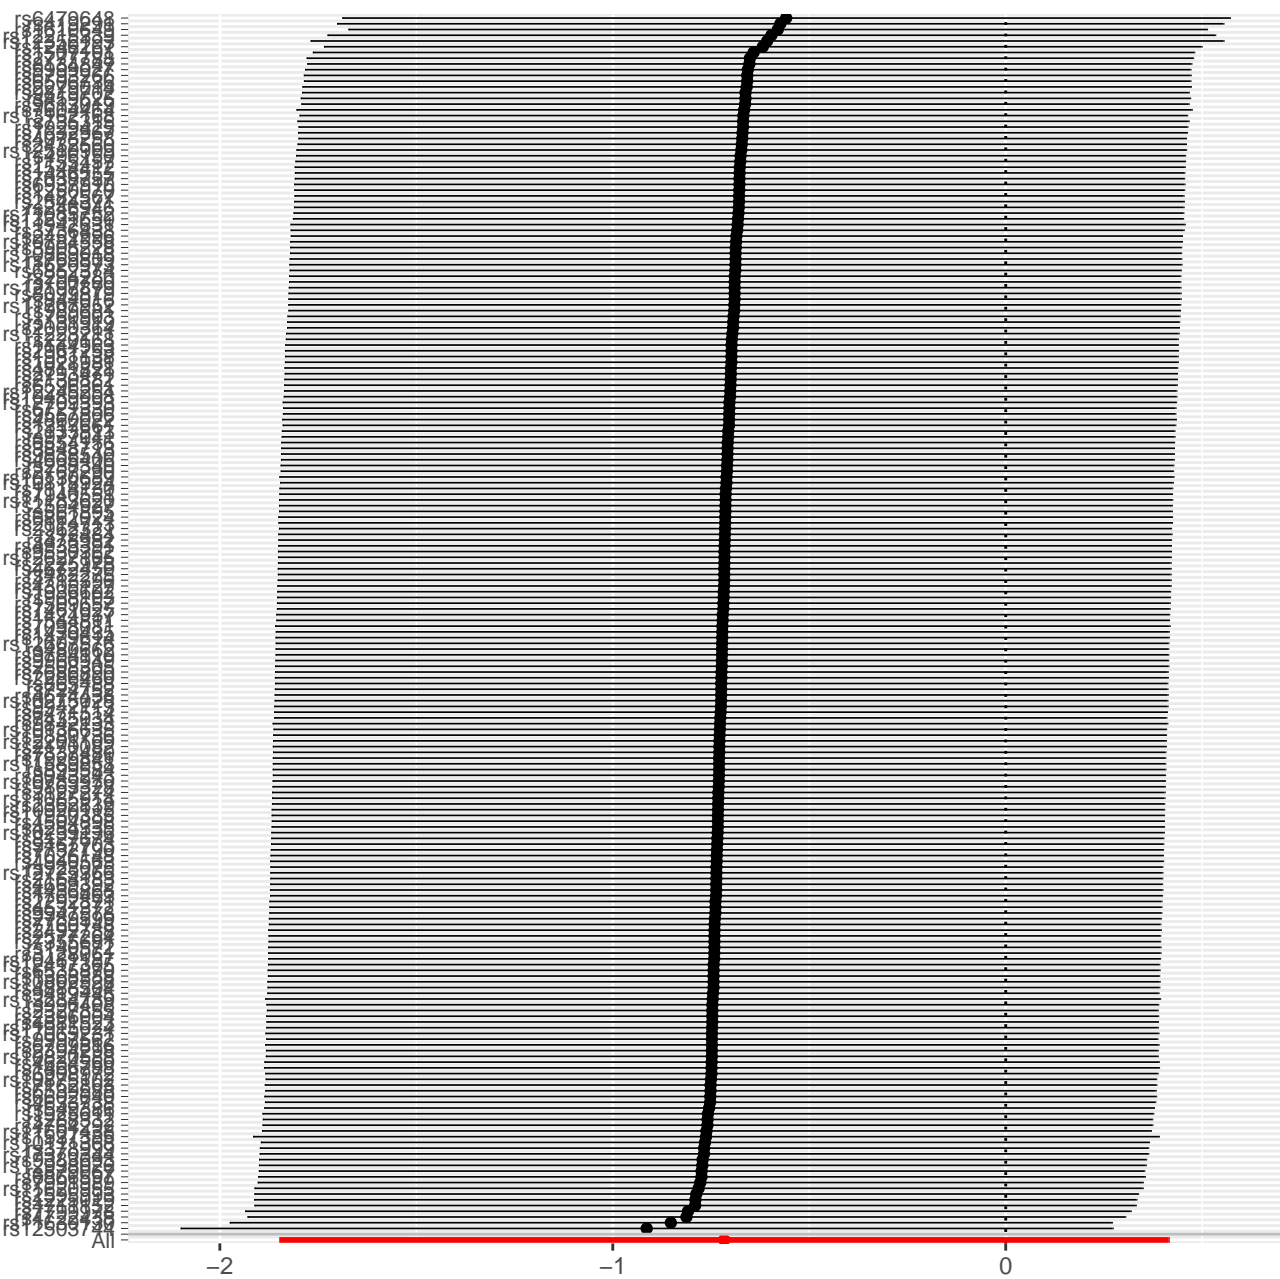

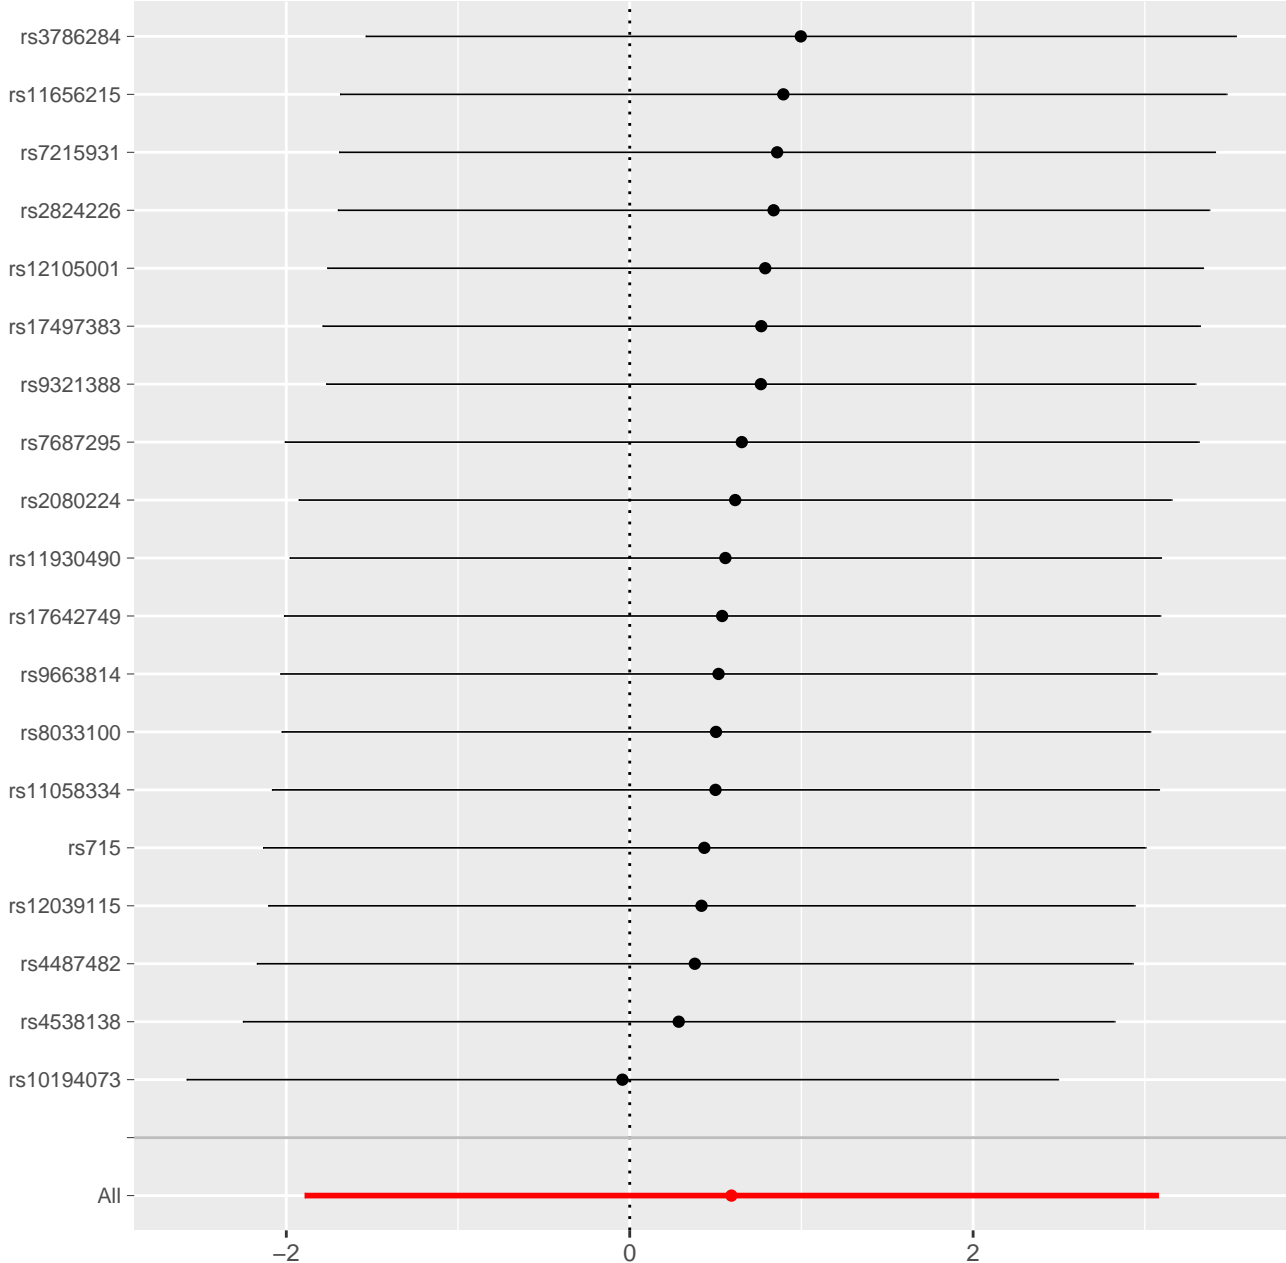

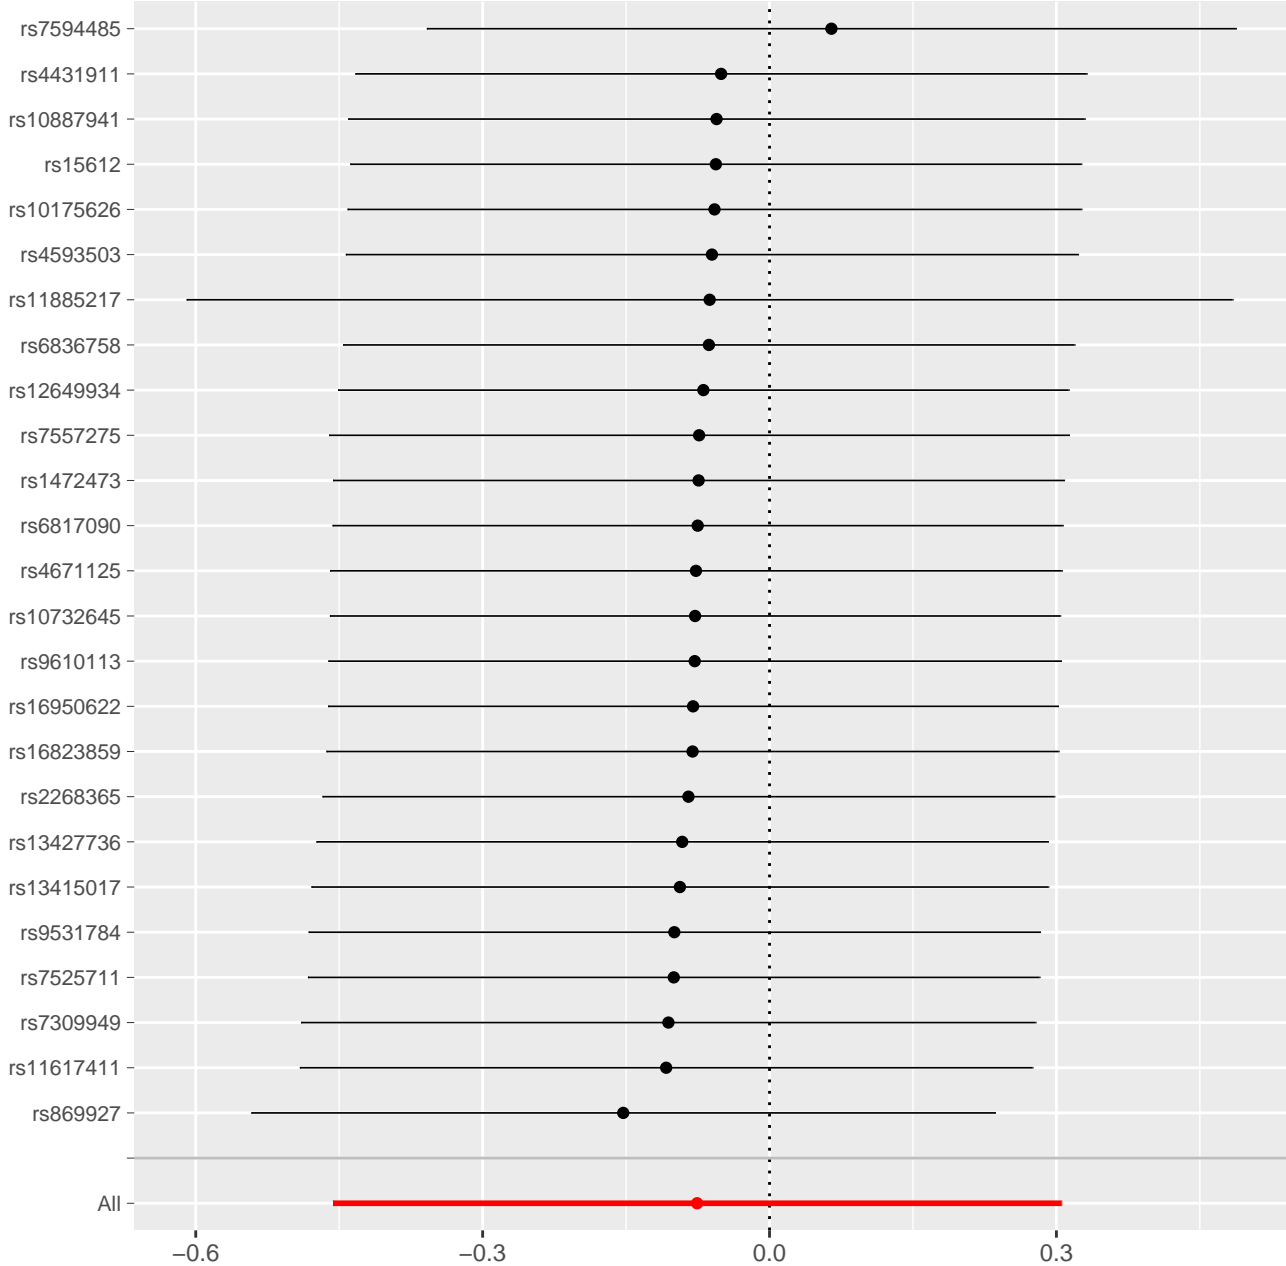

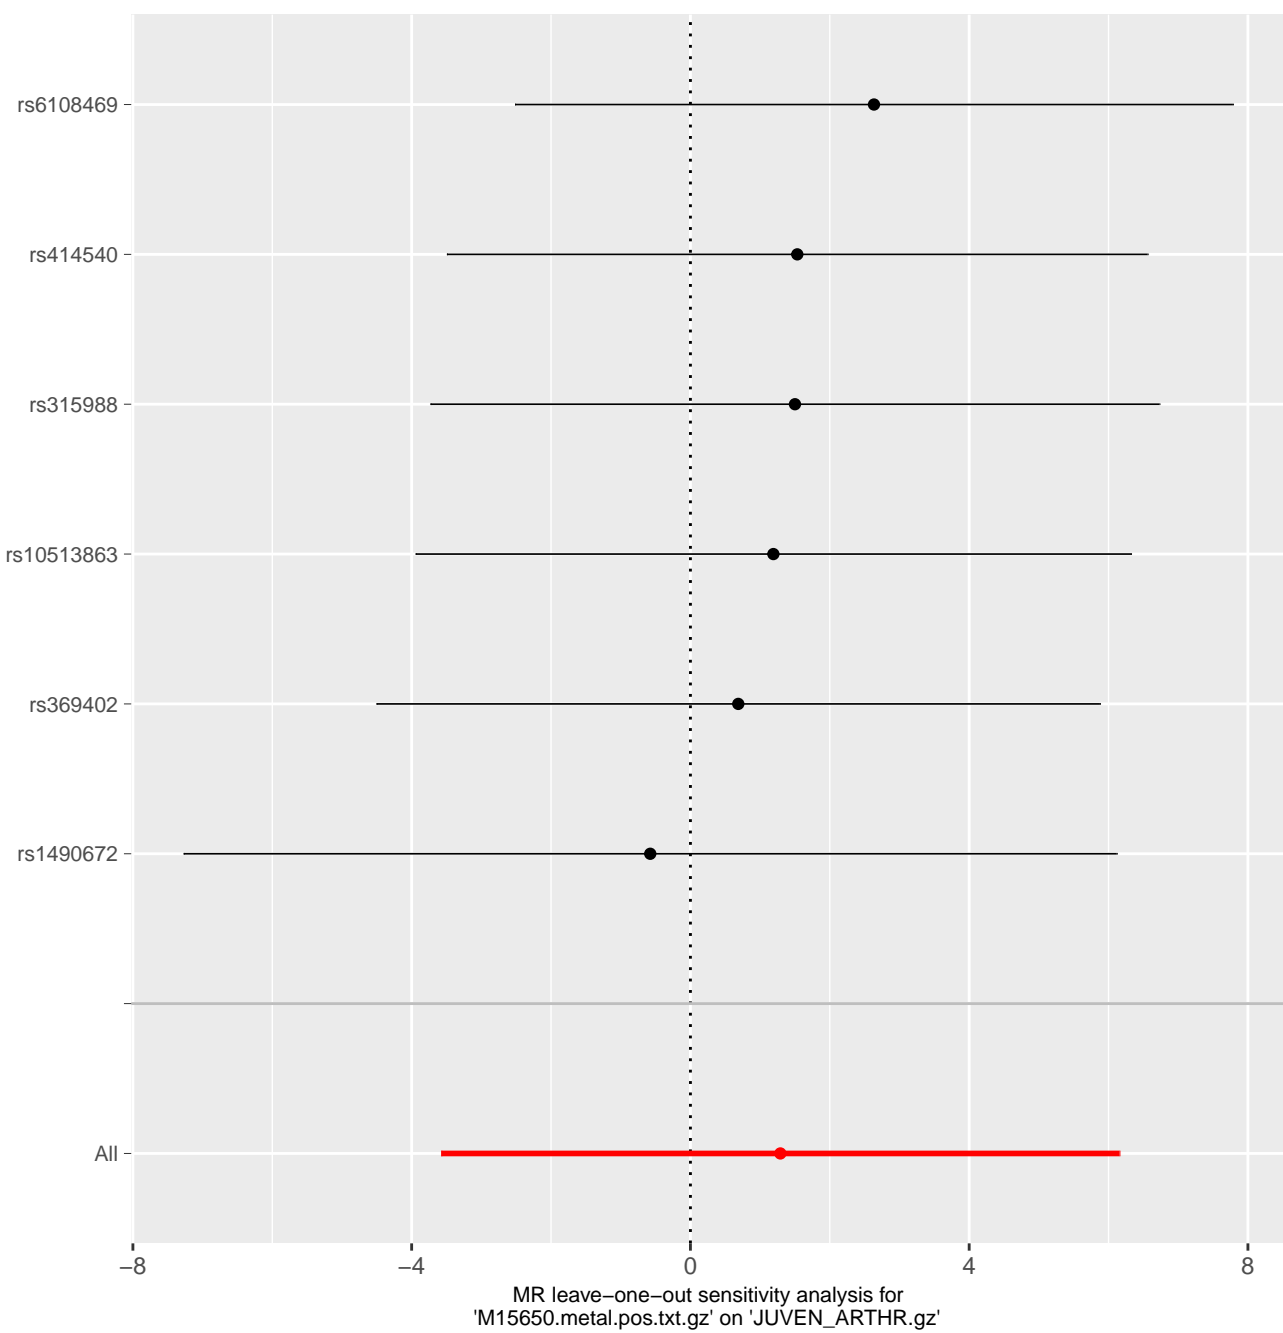

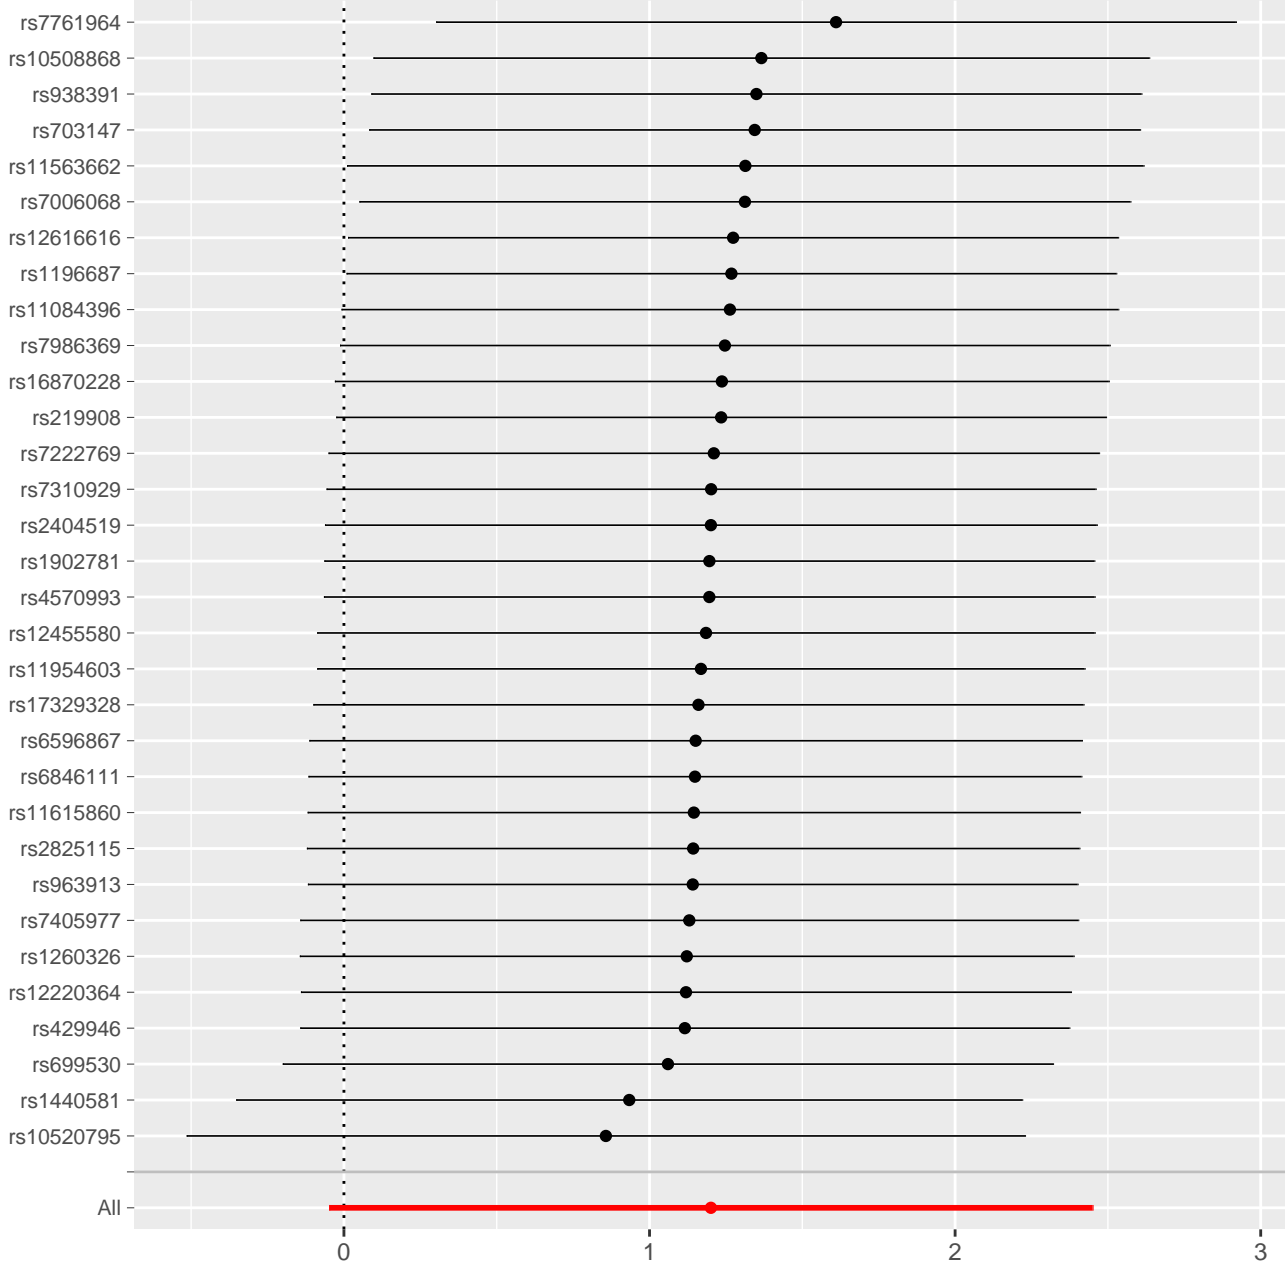

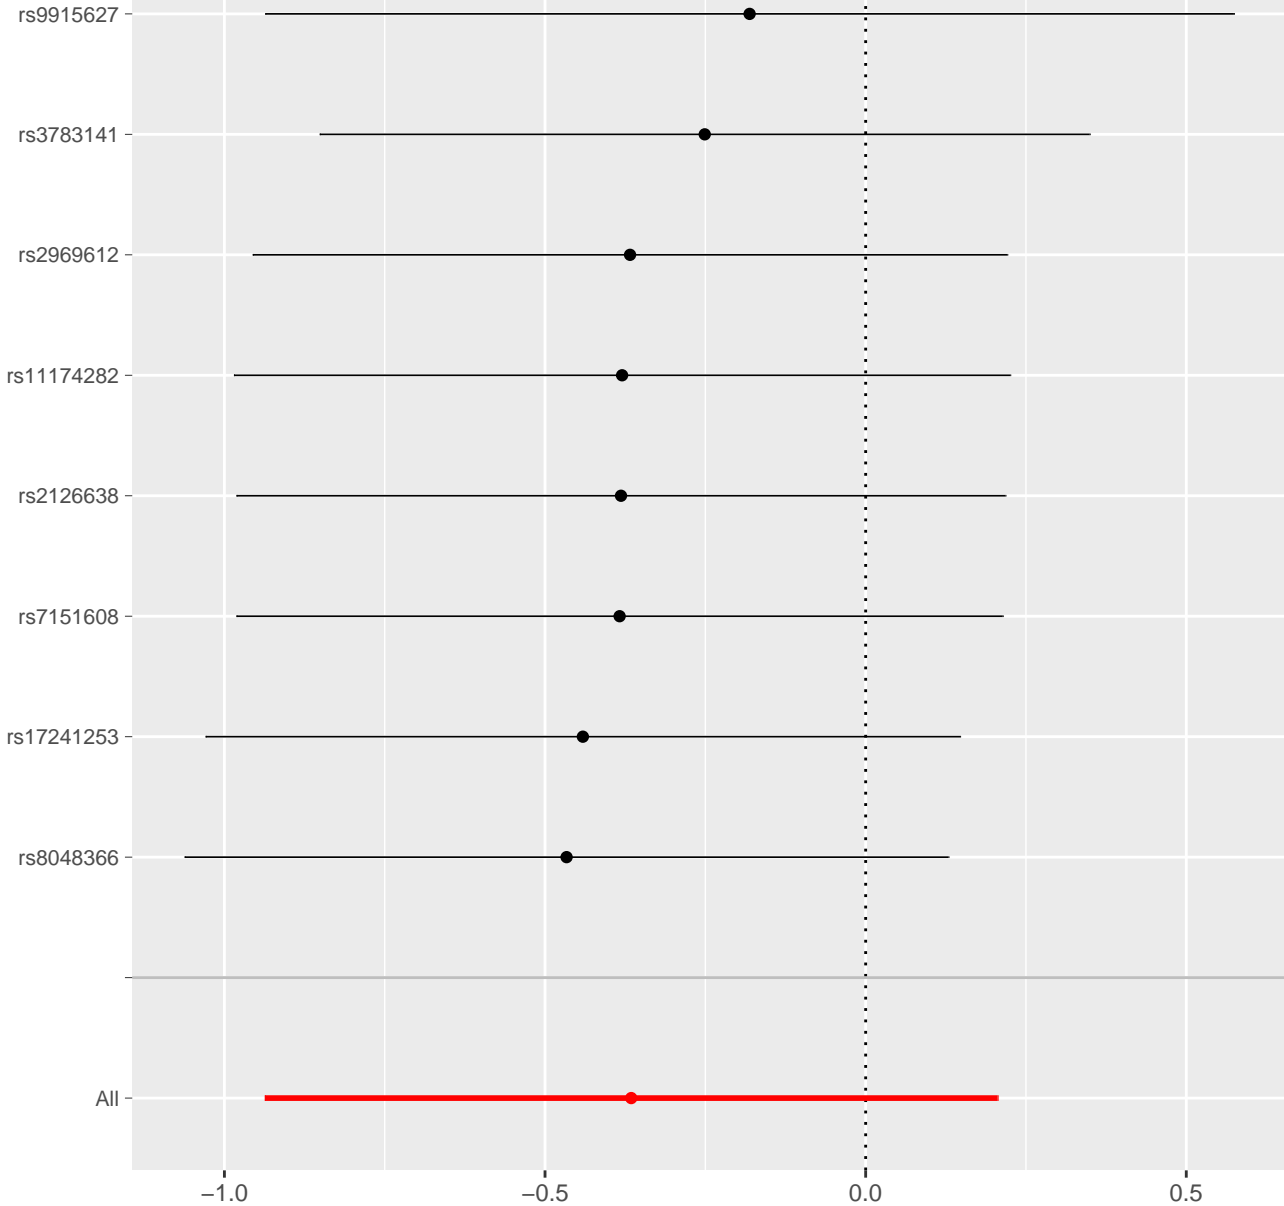

MR leave-one-out sensitivity analysis for 'M15677.metal.pos.txt.gz' on 'JUVEN\_ARTHR.gz'

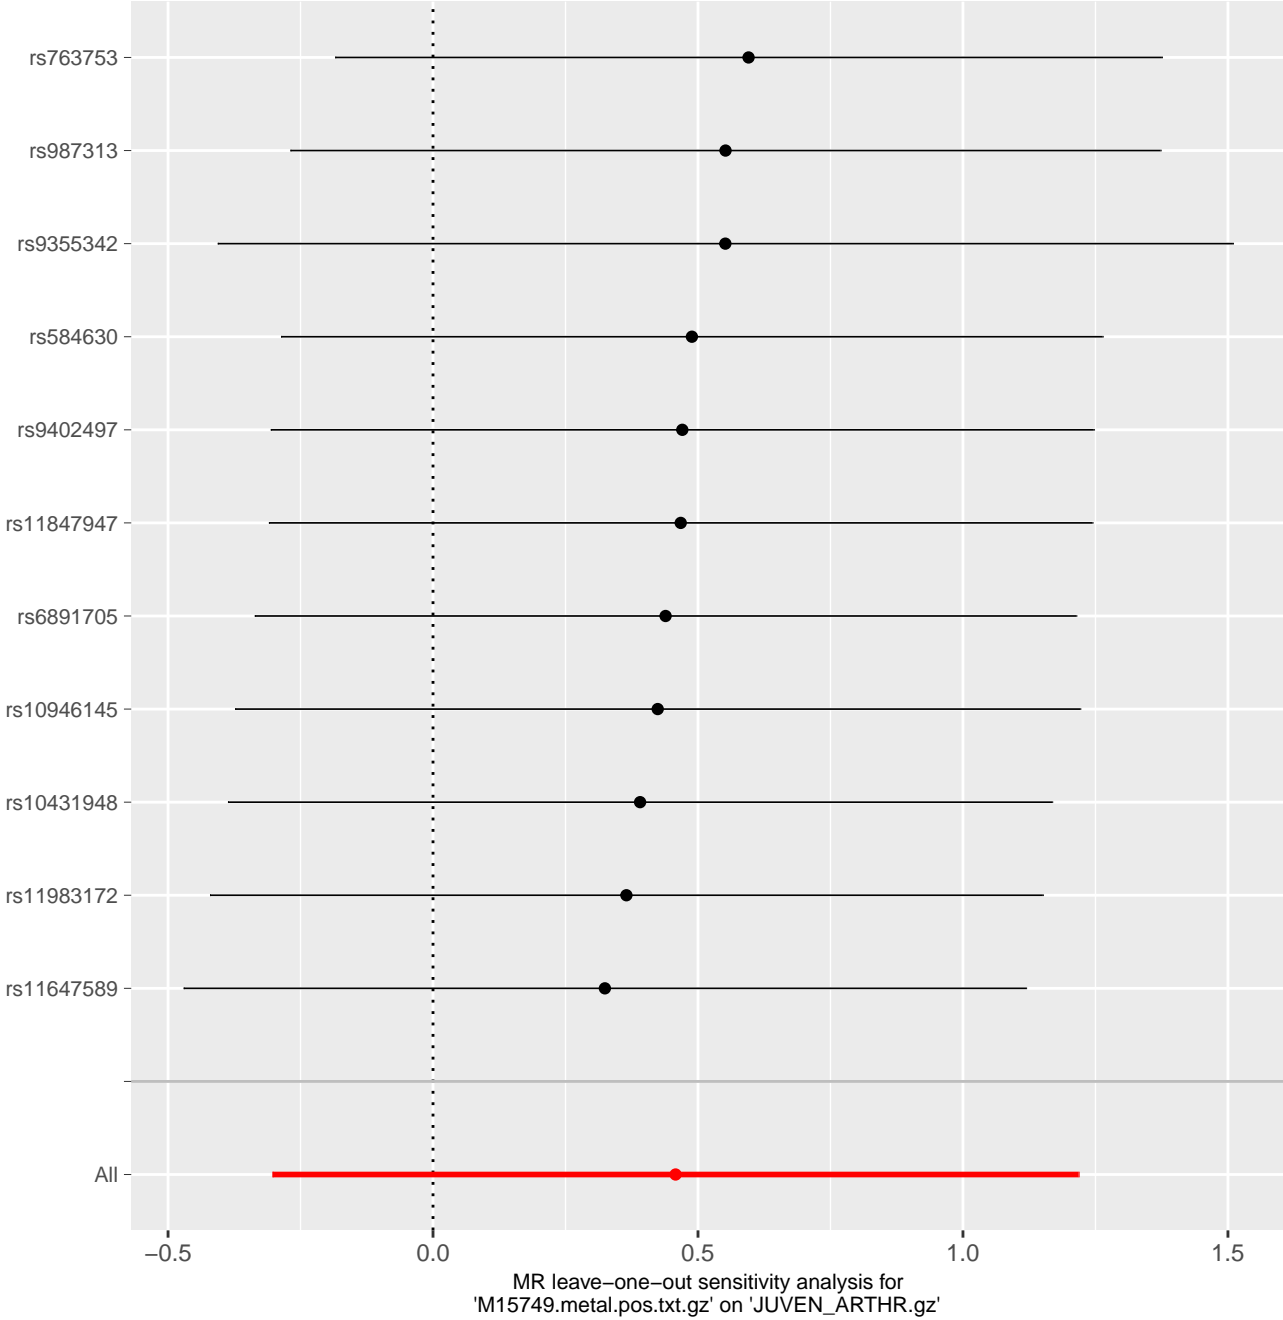

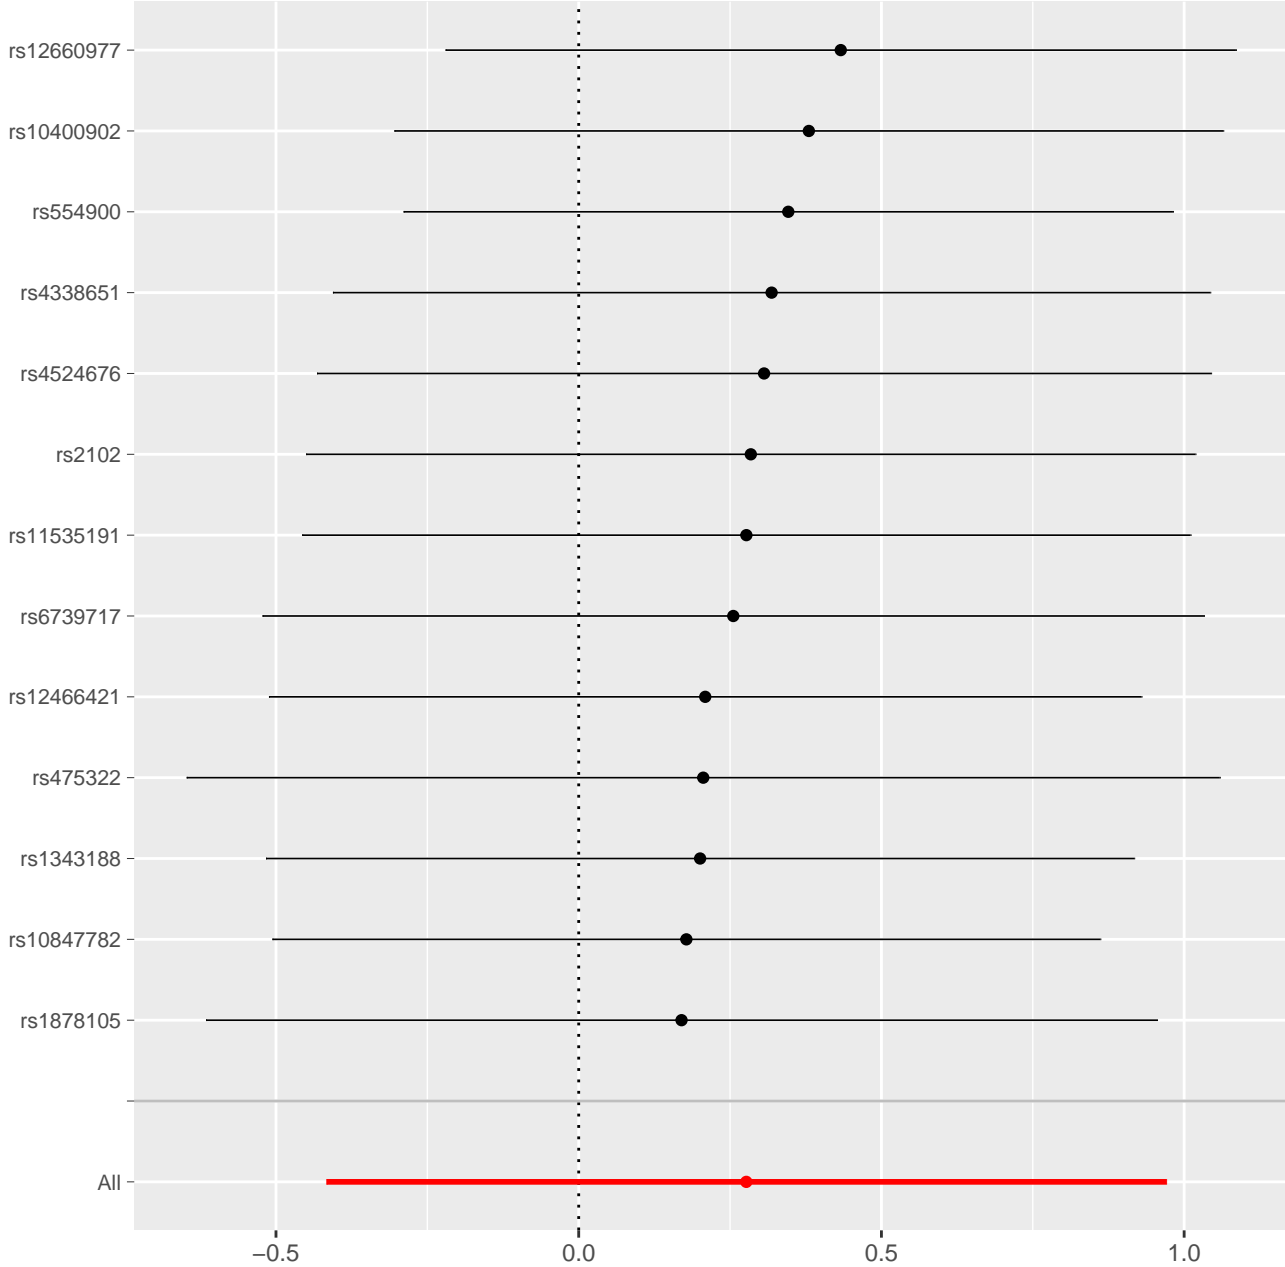



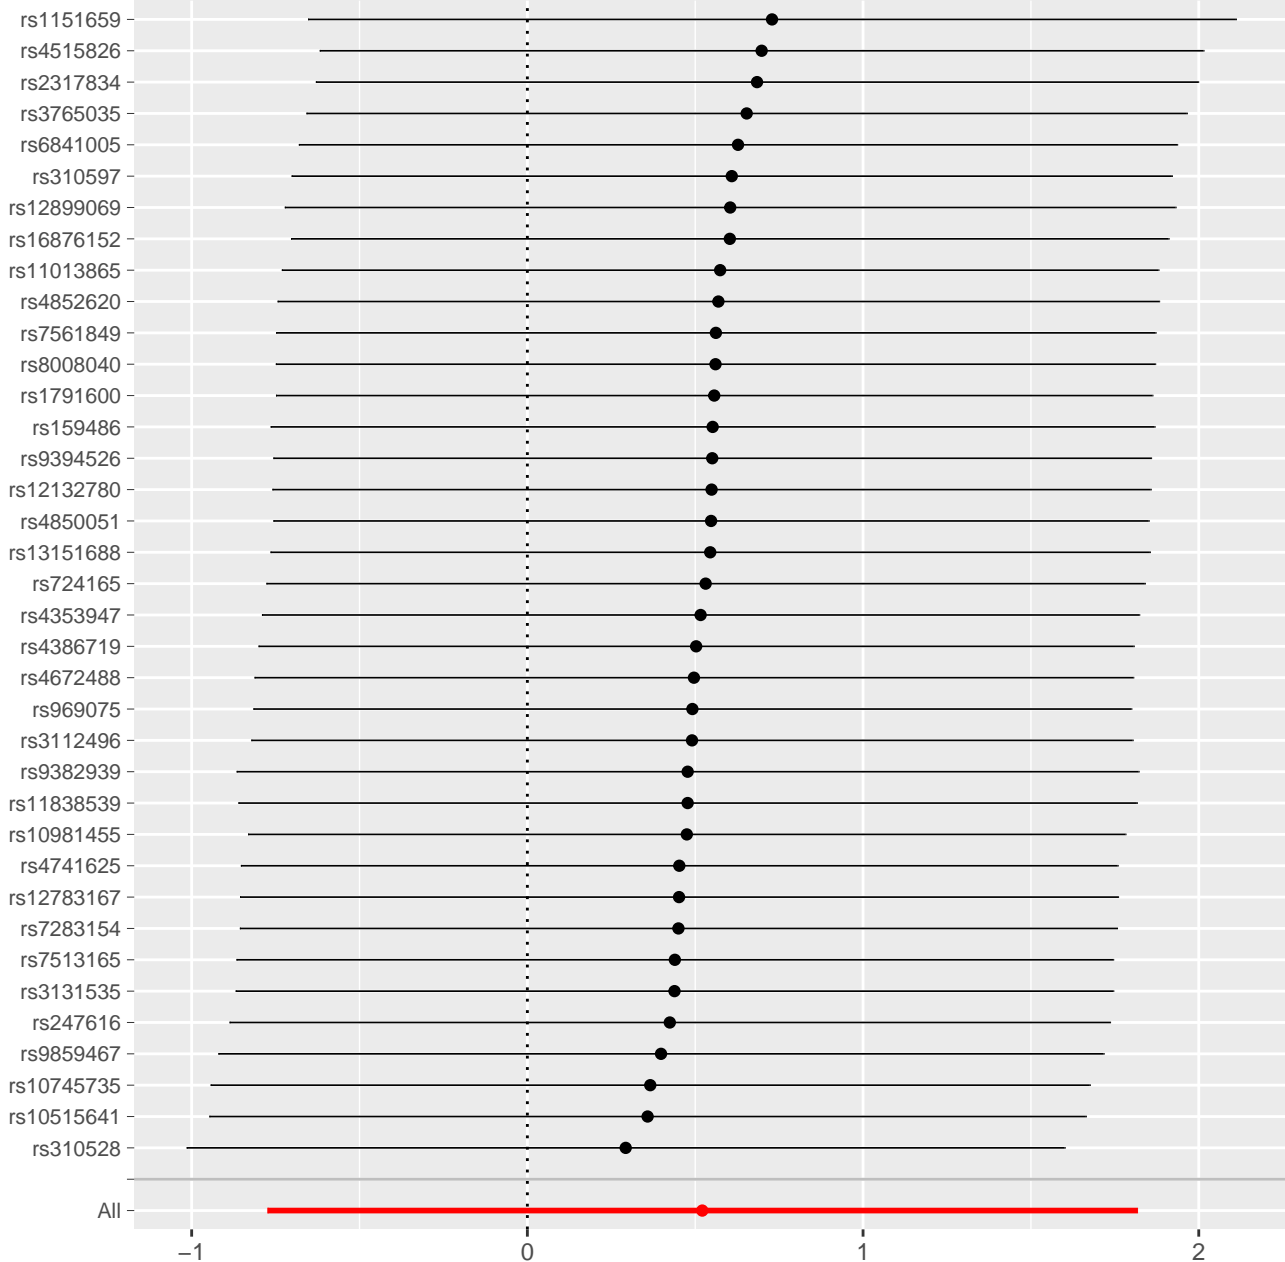

MR leave-one-out sensitivity analysis for 'M15778.metal.pos.txt.gz' on 'JUVEN\_ARTHR.gz'

rs2345834  
rs2133896  
rs16885269  
rs2579931  
rs7243187  
rs201060  
rs10520388  
rs4296931  
rs17683199  
All

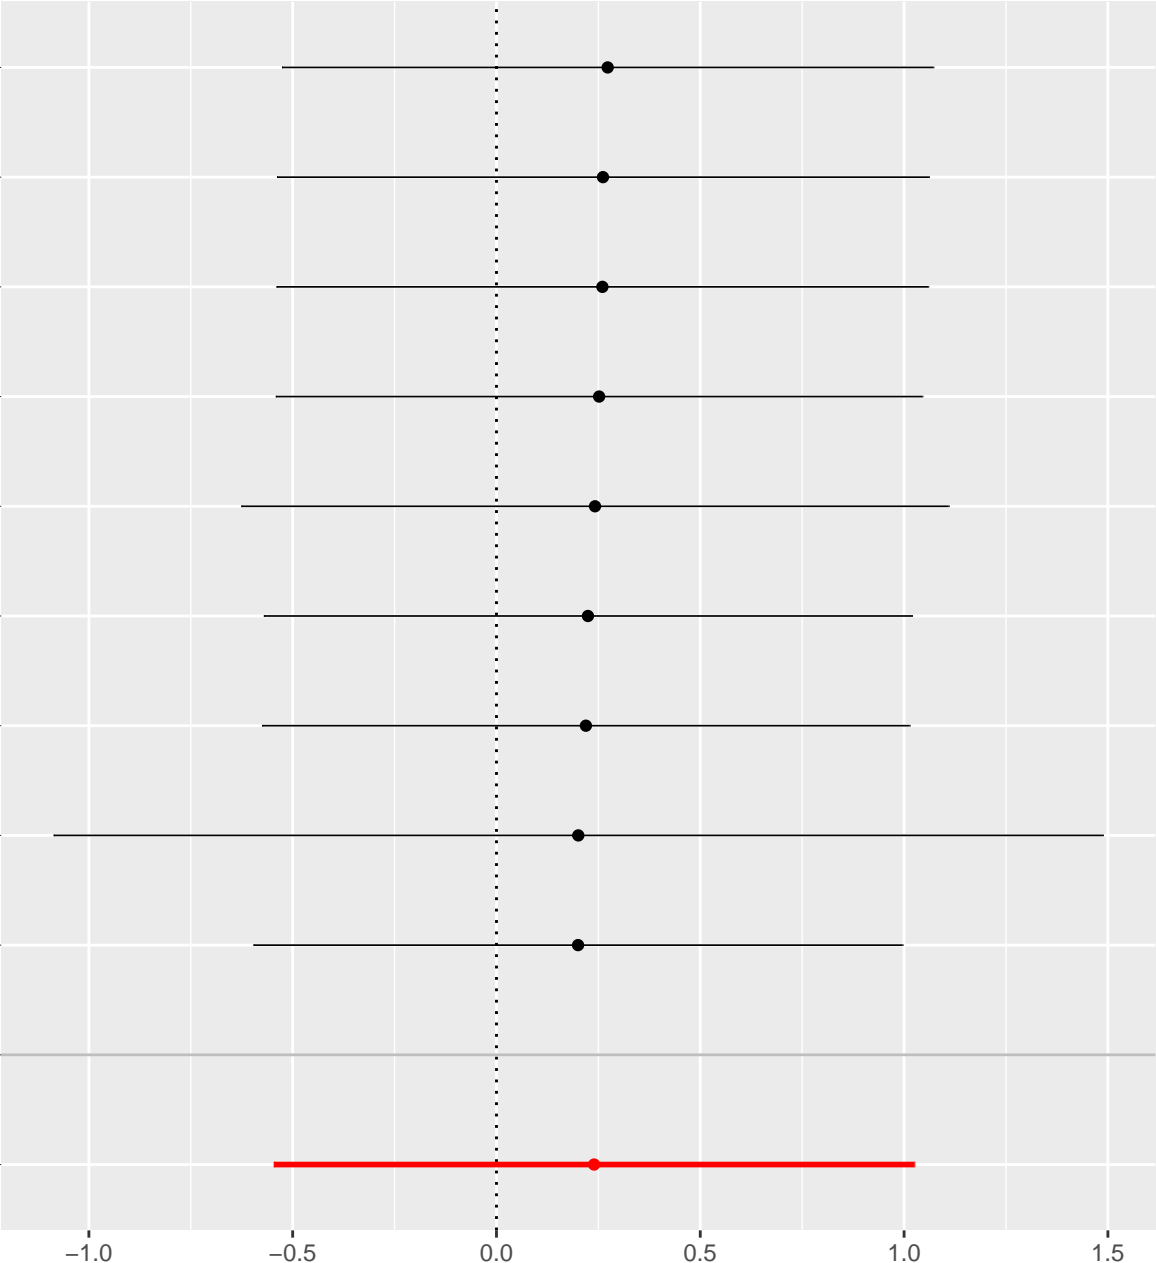

MR leave-one-out sensitivity analysis for 'M15958.metal.pos.txt.gz' on 'JUVEN\_ARTHR.gz'

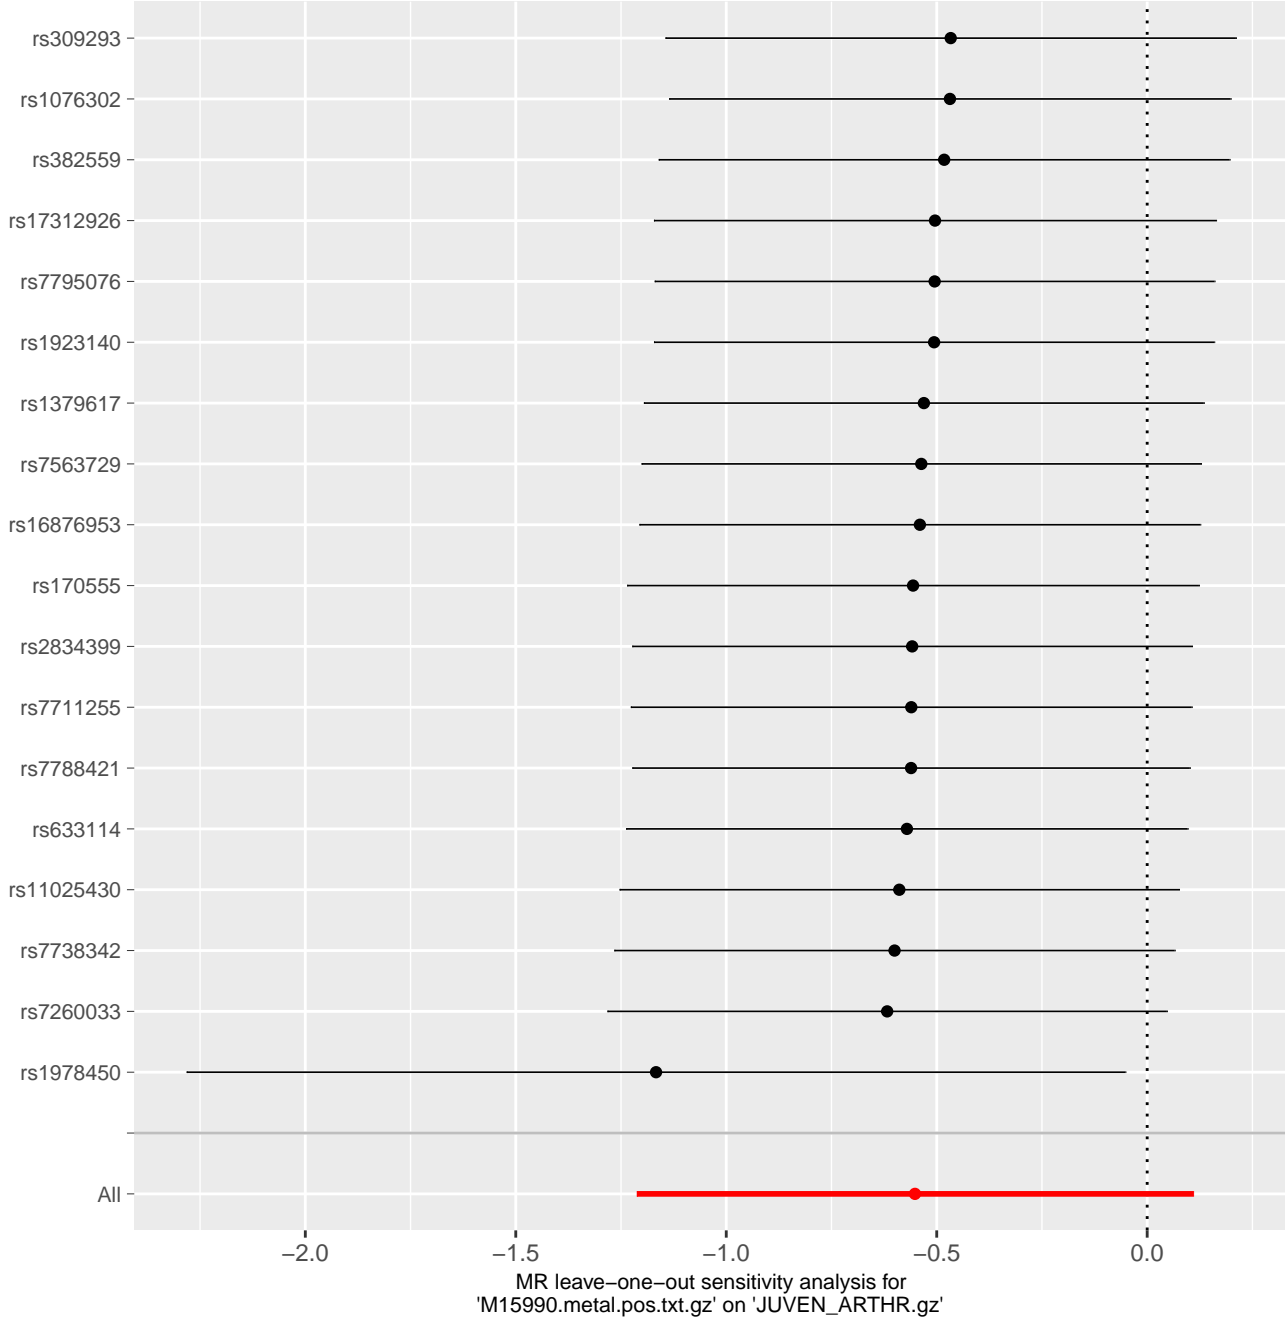

rs6854832

rs12954899

rs7150776

rs4690523

All

-2

0

2

4

MR leave-one-out sensitivity analysis for  
'M15996.metal.pos.txt.gz' on 'JUVEN\_ARTHR.gz'

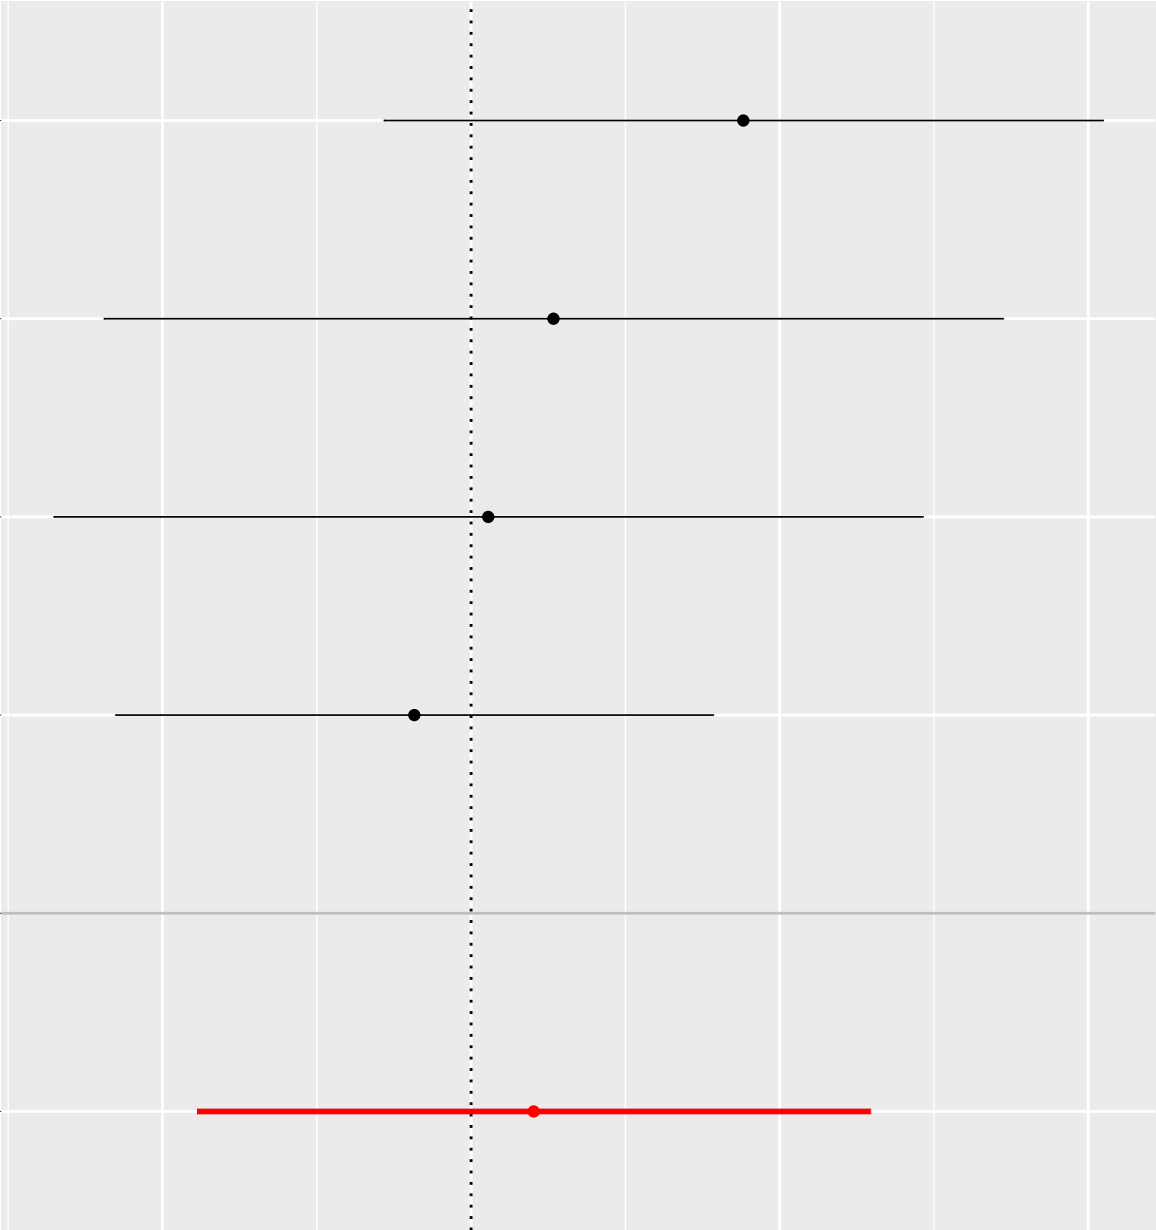

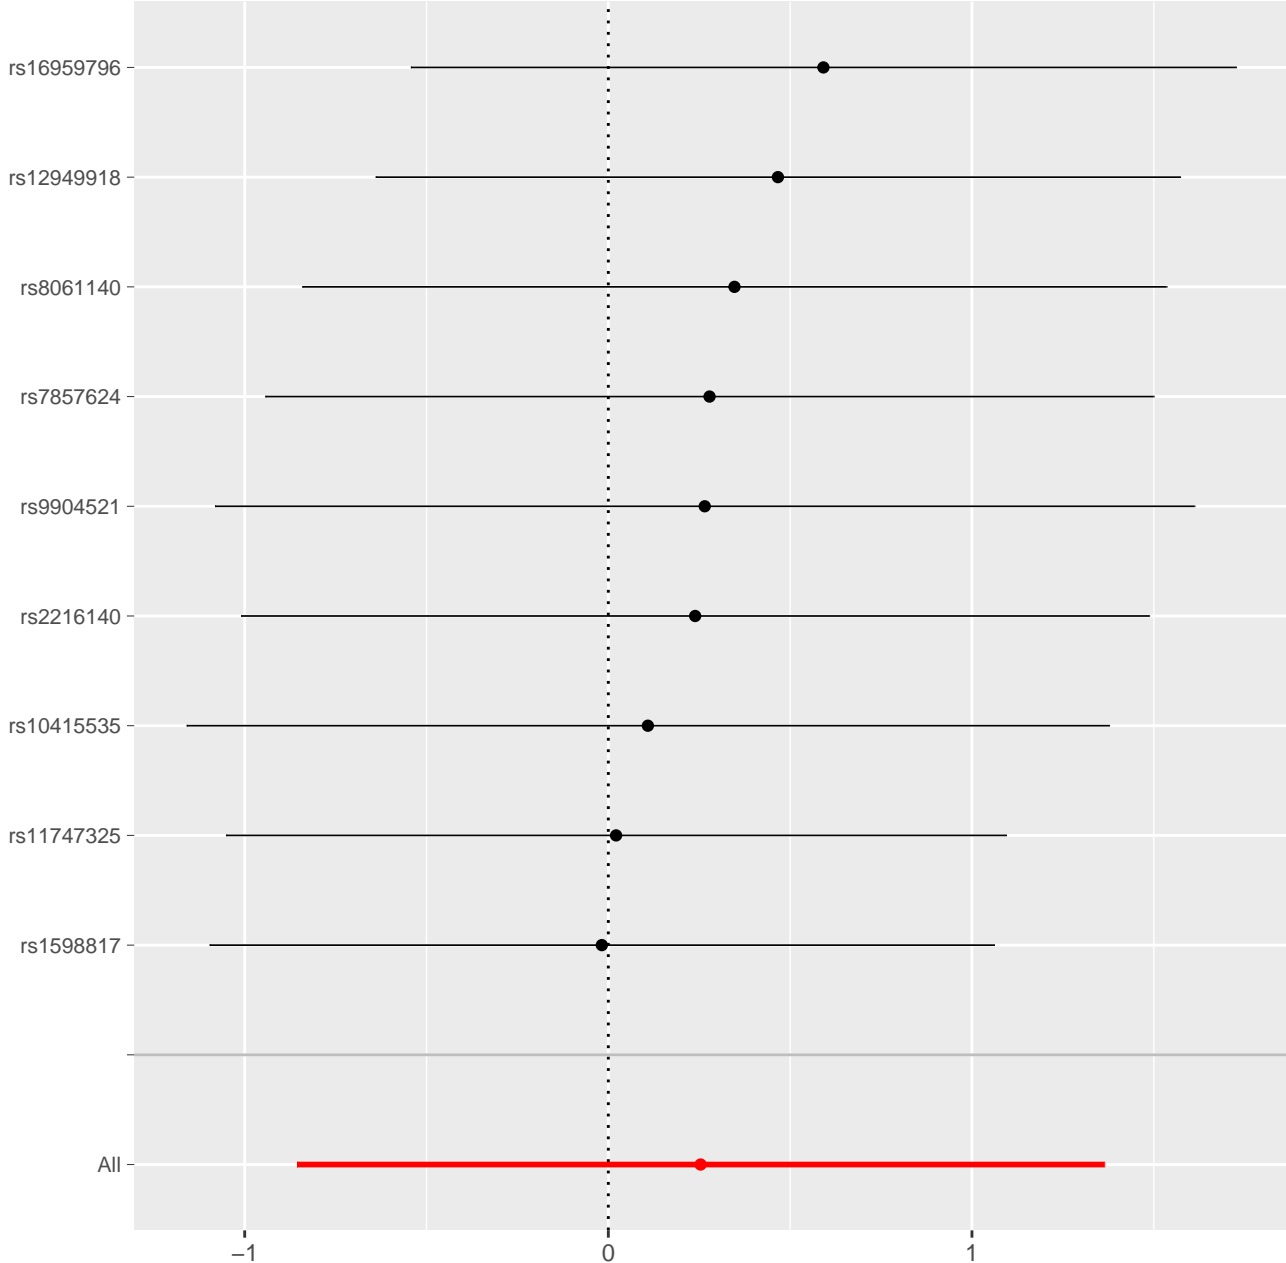

MR leave-one-out sensitivity analysis for 'M16634.metal.pos.txt.gz' on 'JUVEN\_ARTHR.gz'

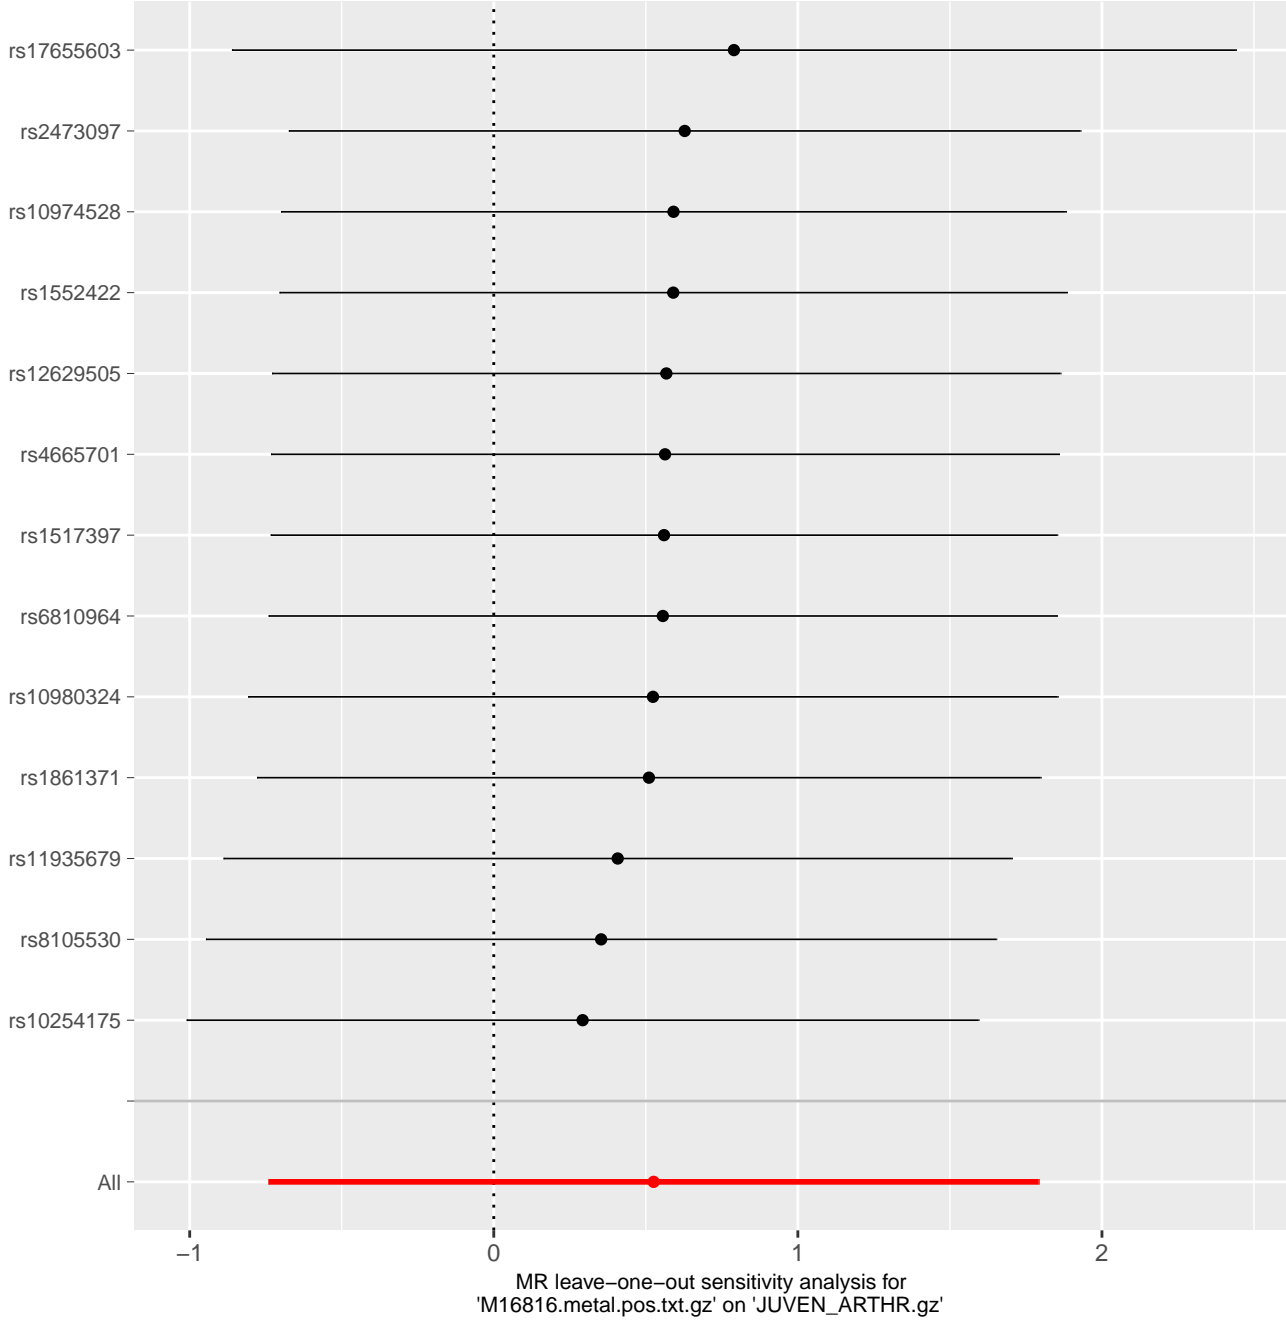

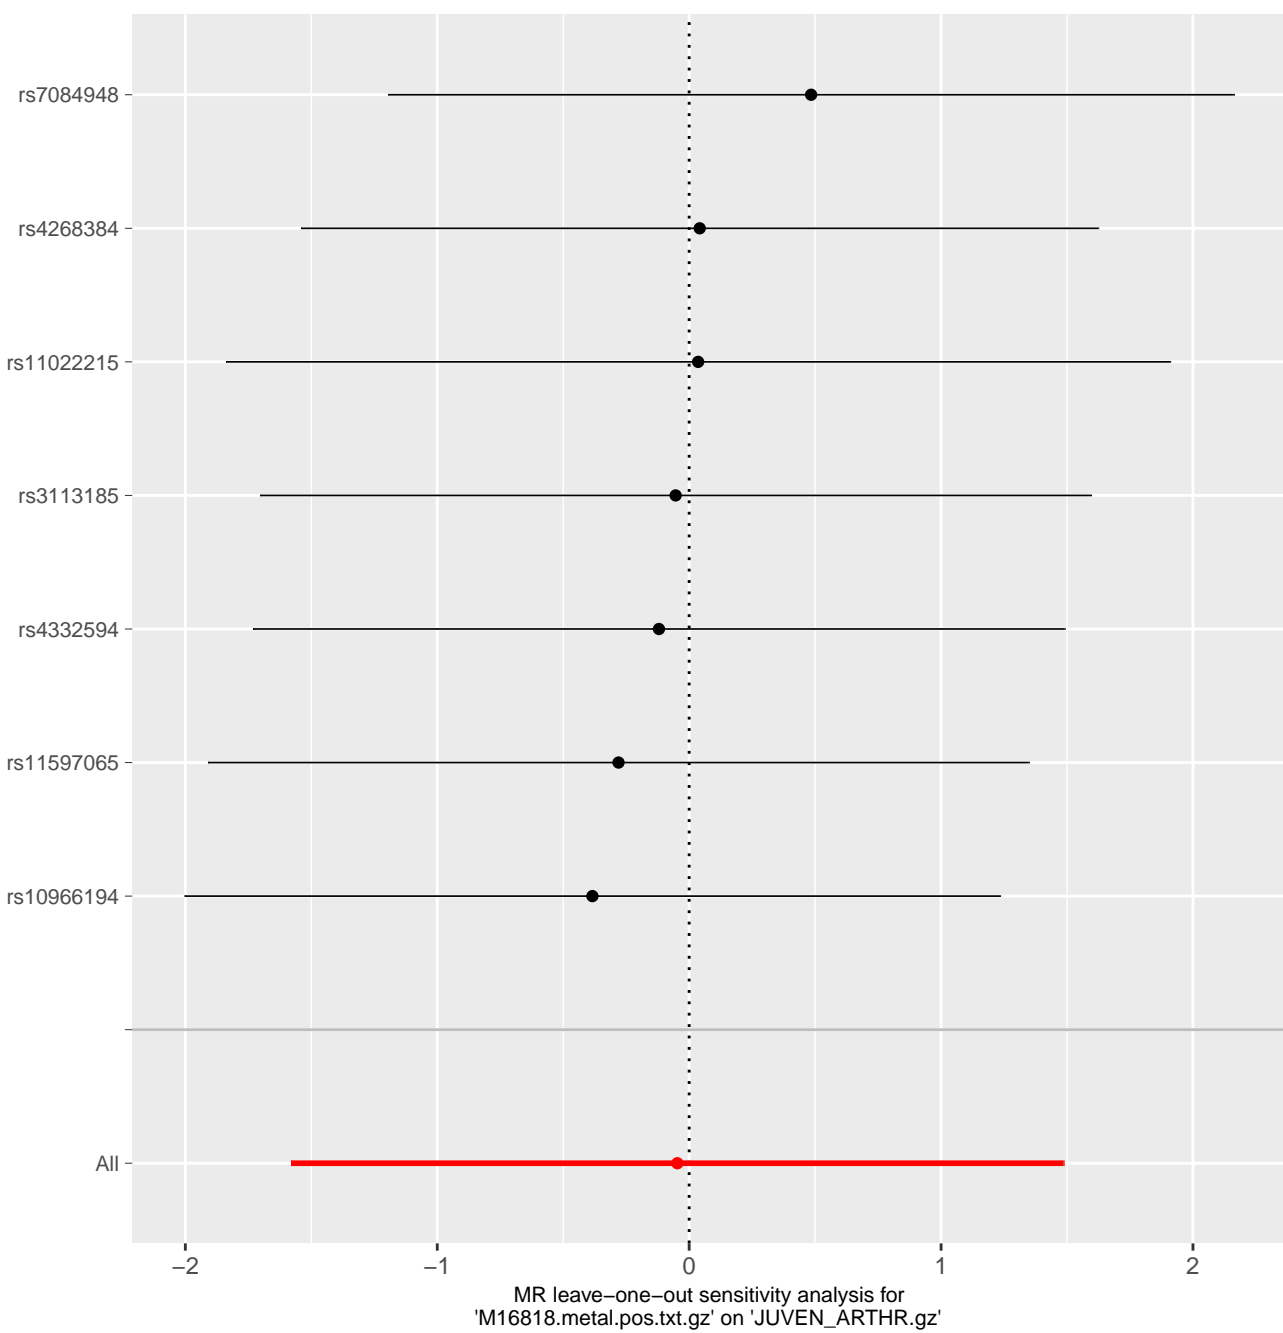

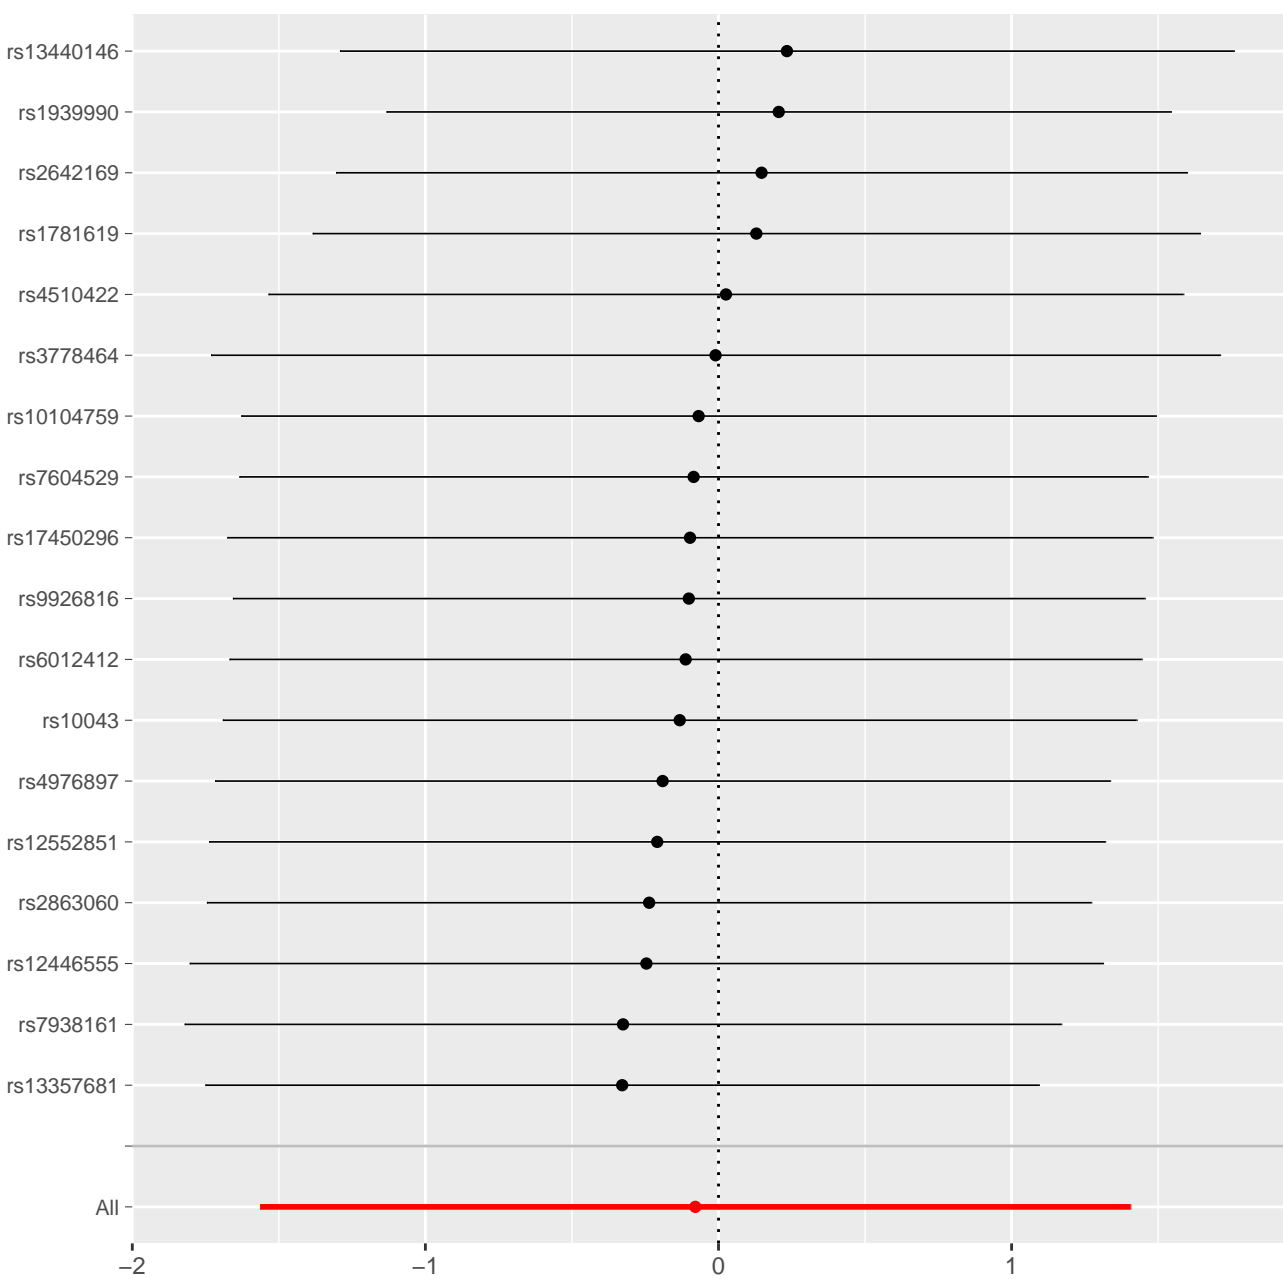



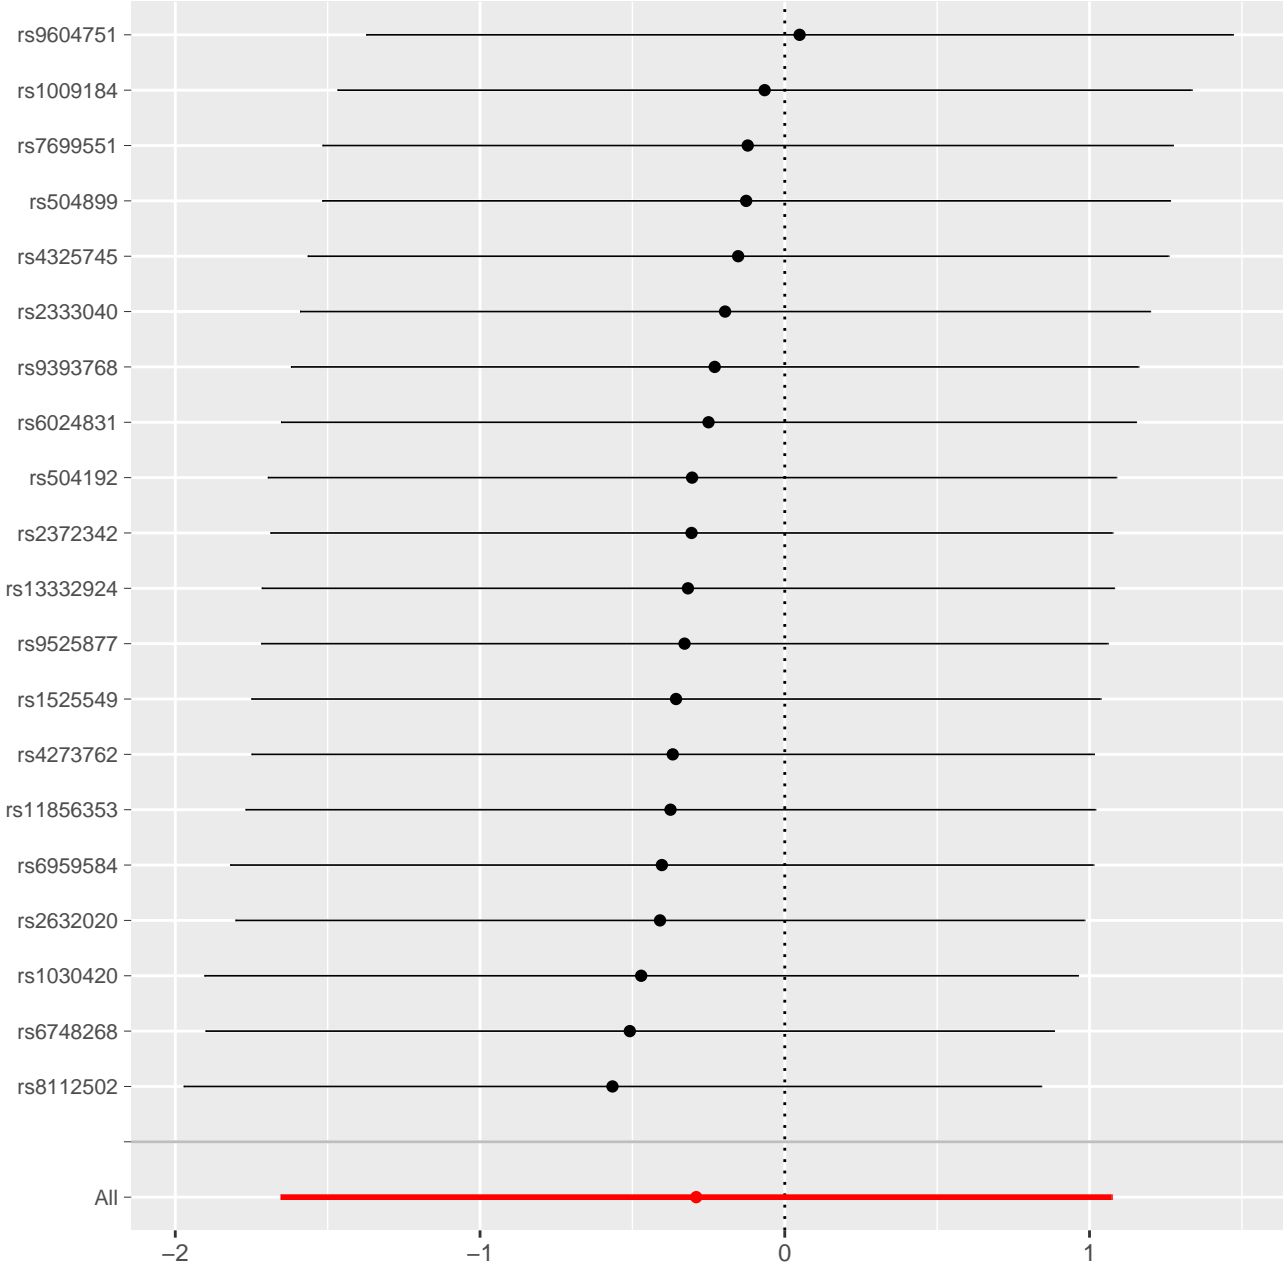

MR leave-one-out sensitivity analysis for 'M16822.metal.pos.txt.gz' on 'JUVEN\_ARTHR.gz'

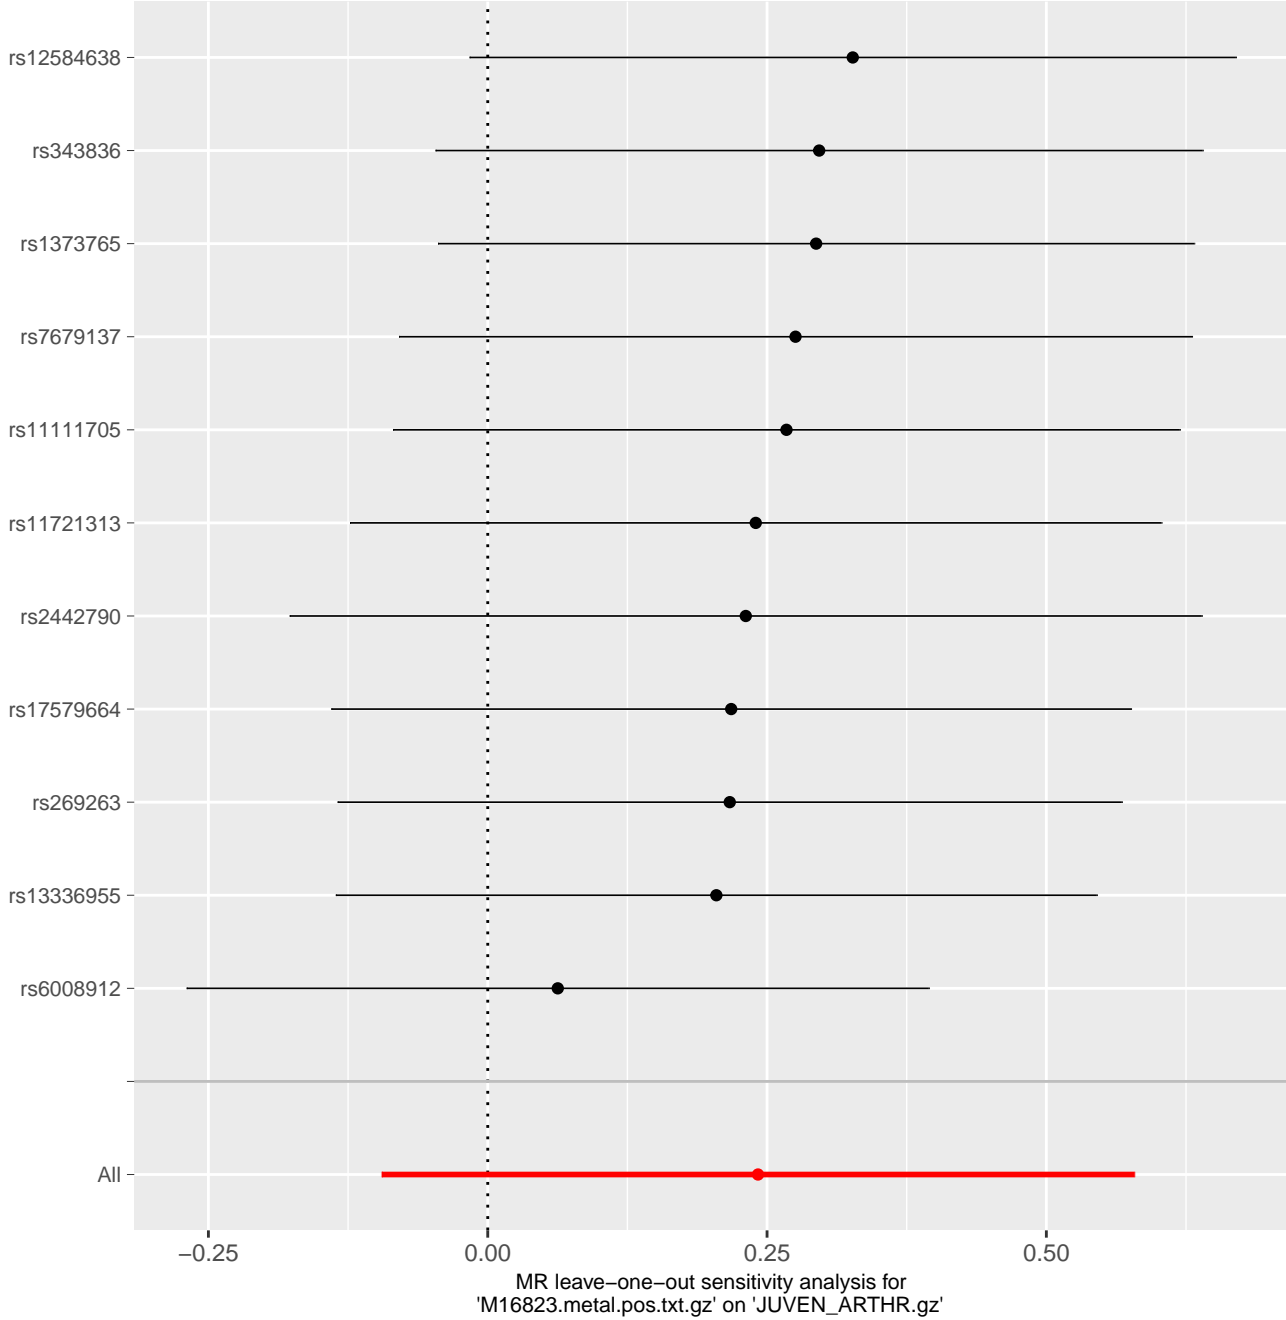

MR leave-one-out sensitivity analysis for 'M17799.metal.pos.txt.gz' on 'JUVEN\_ARTHR.gz'

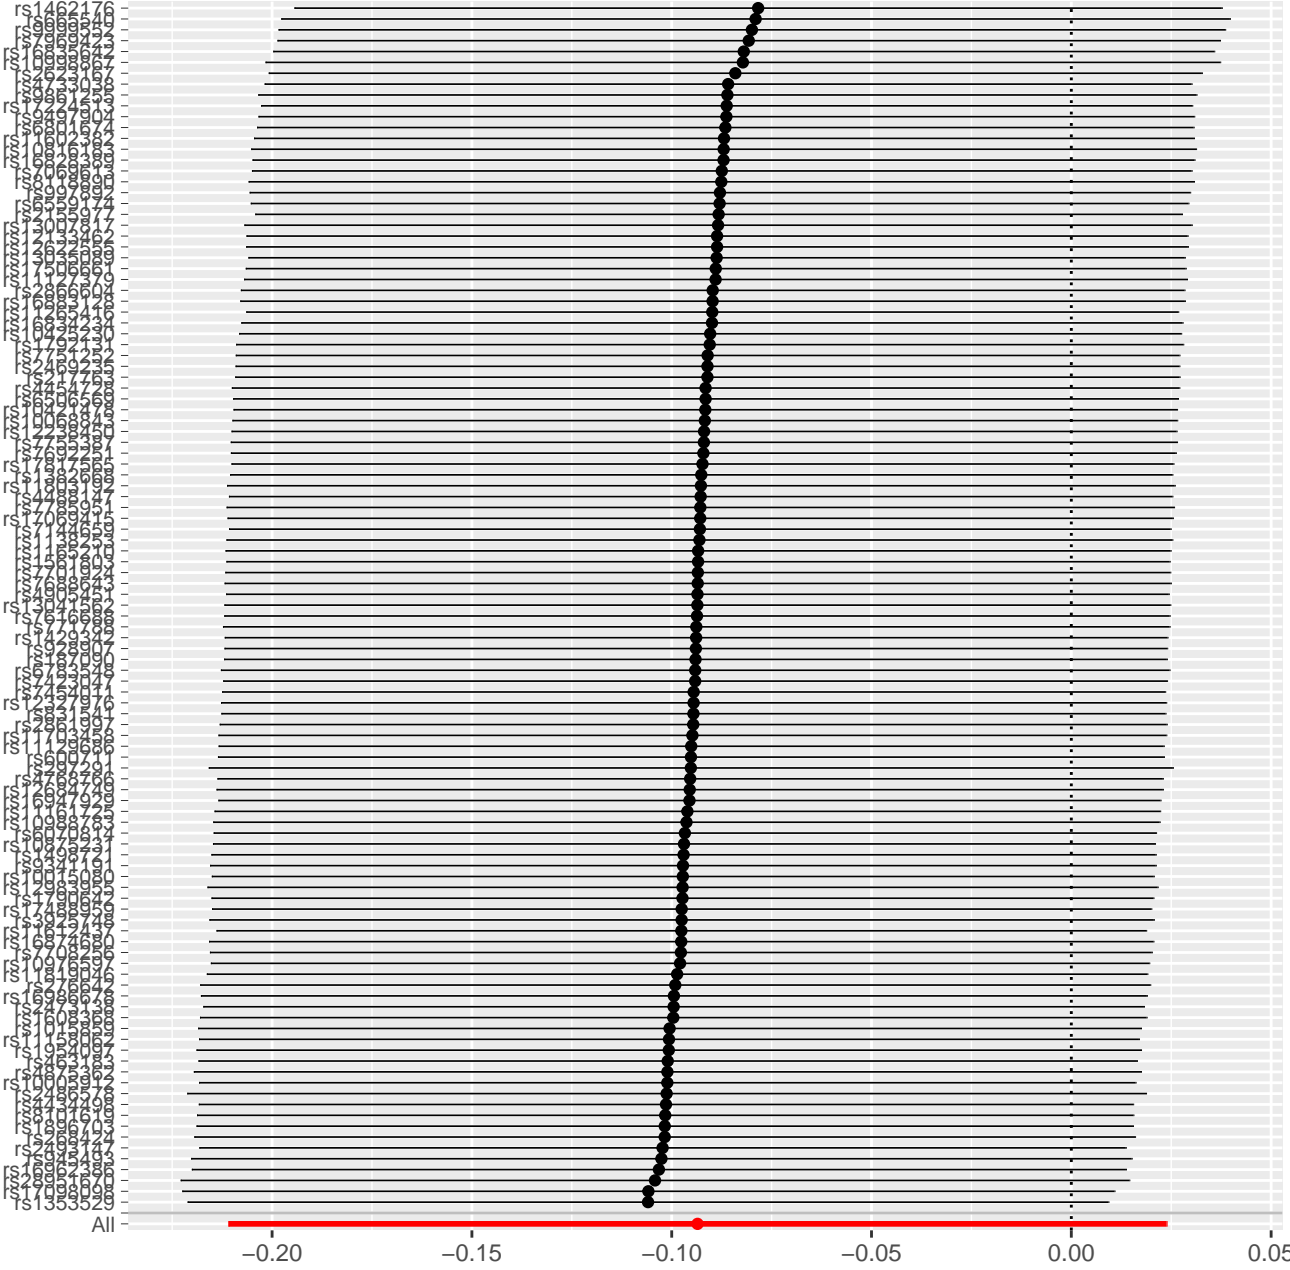

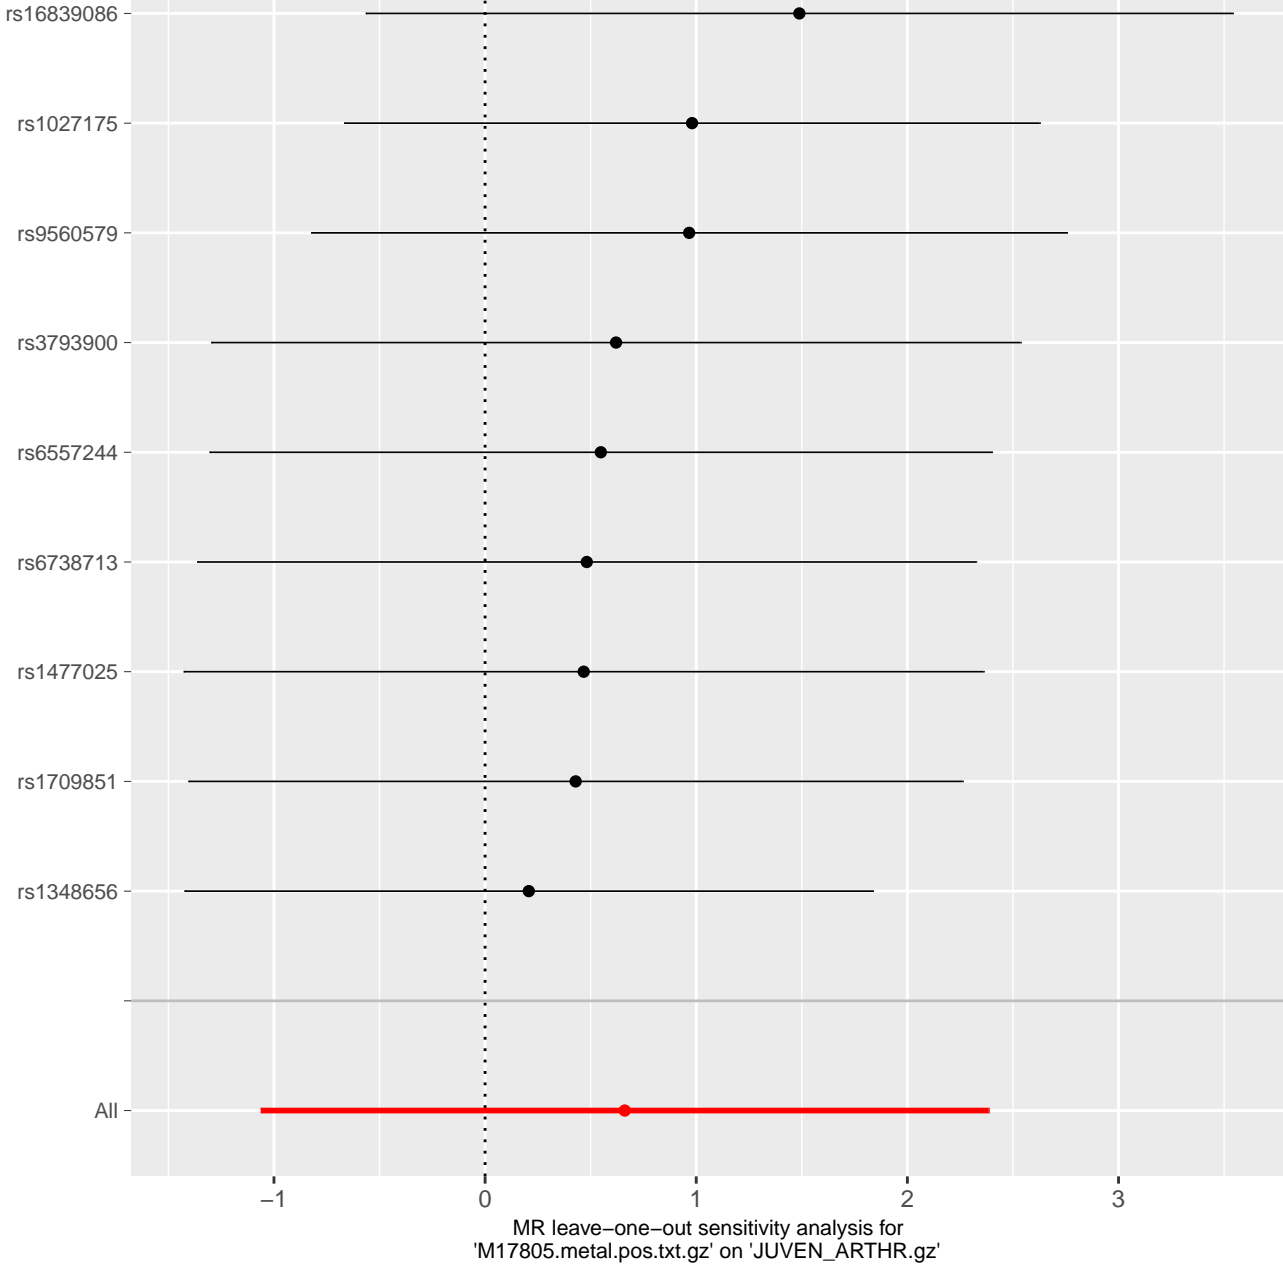

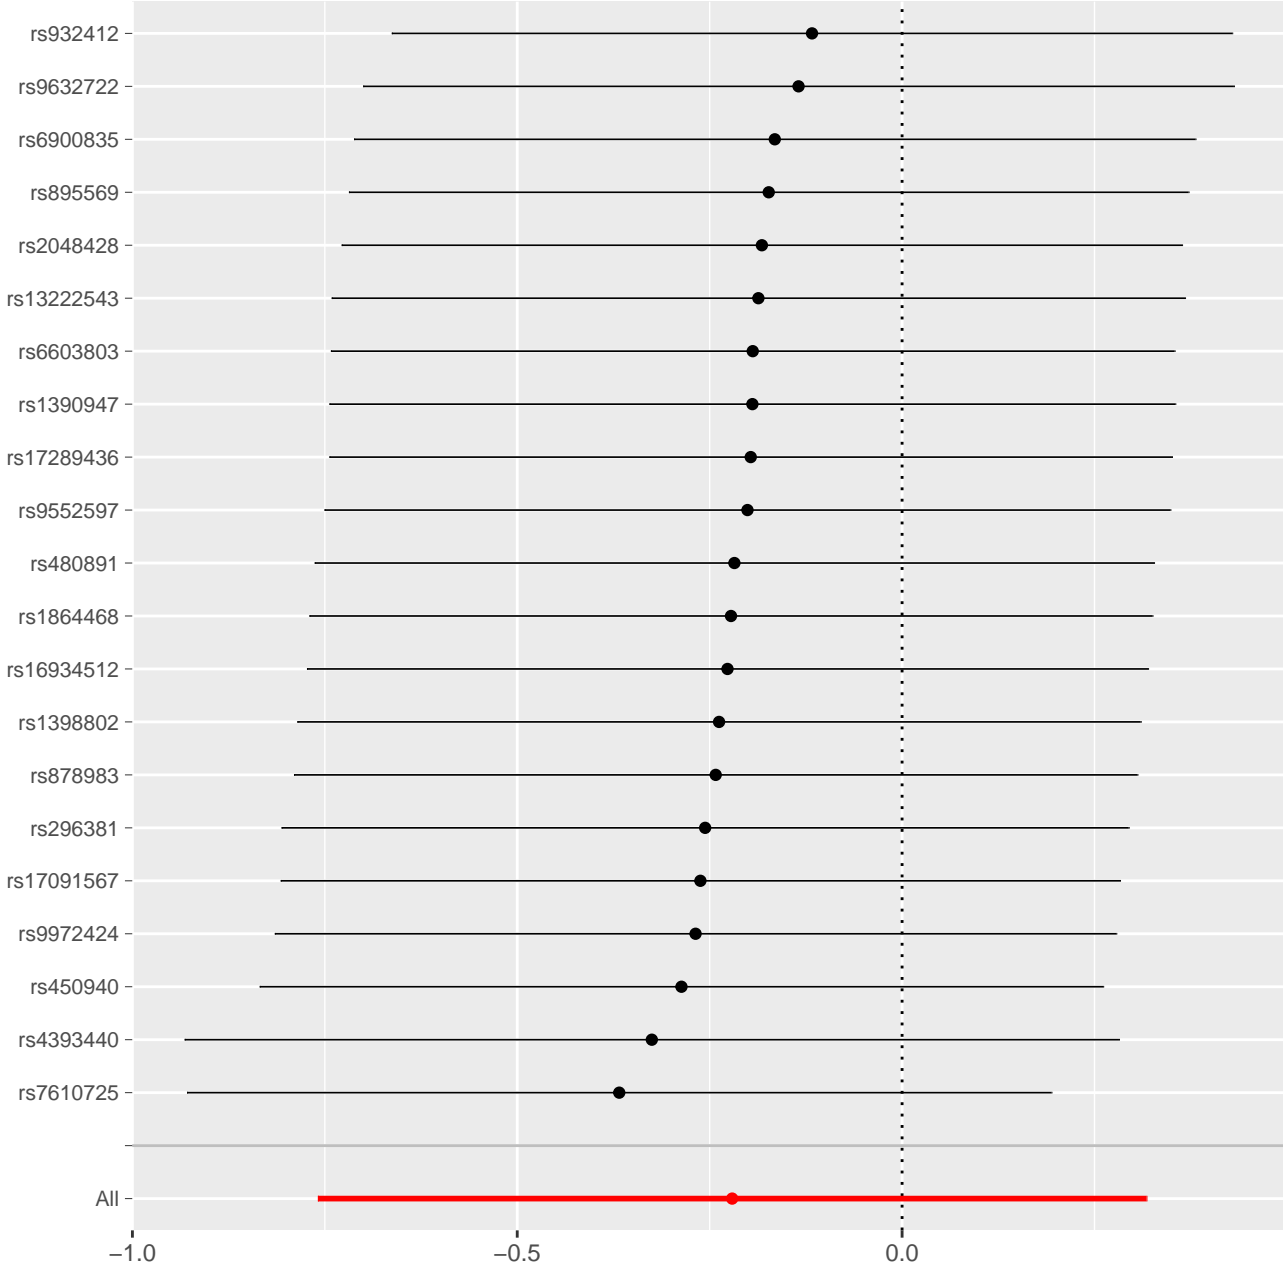

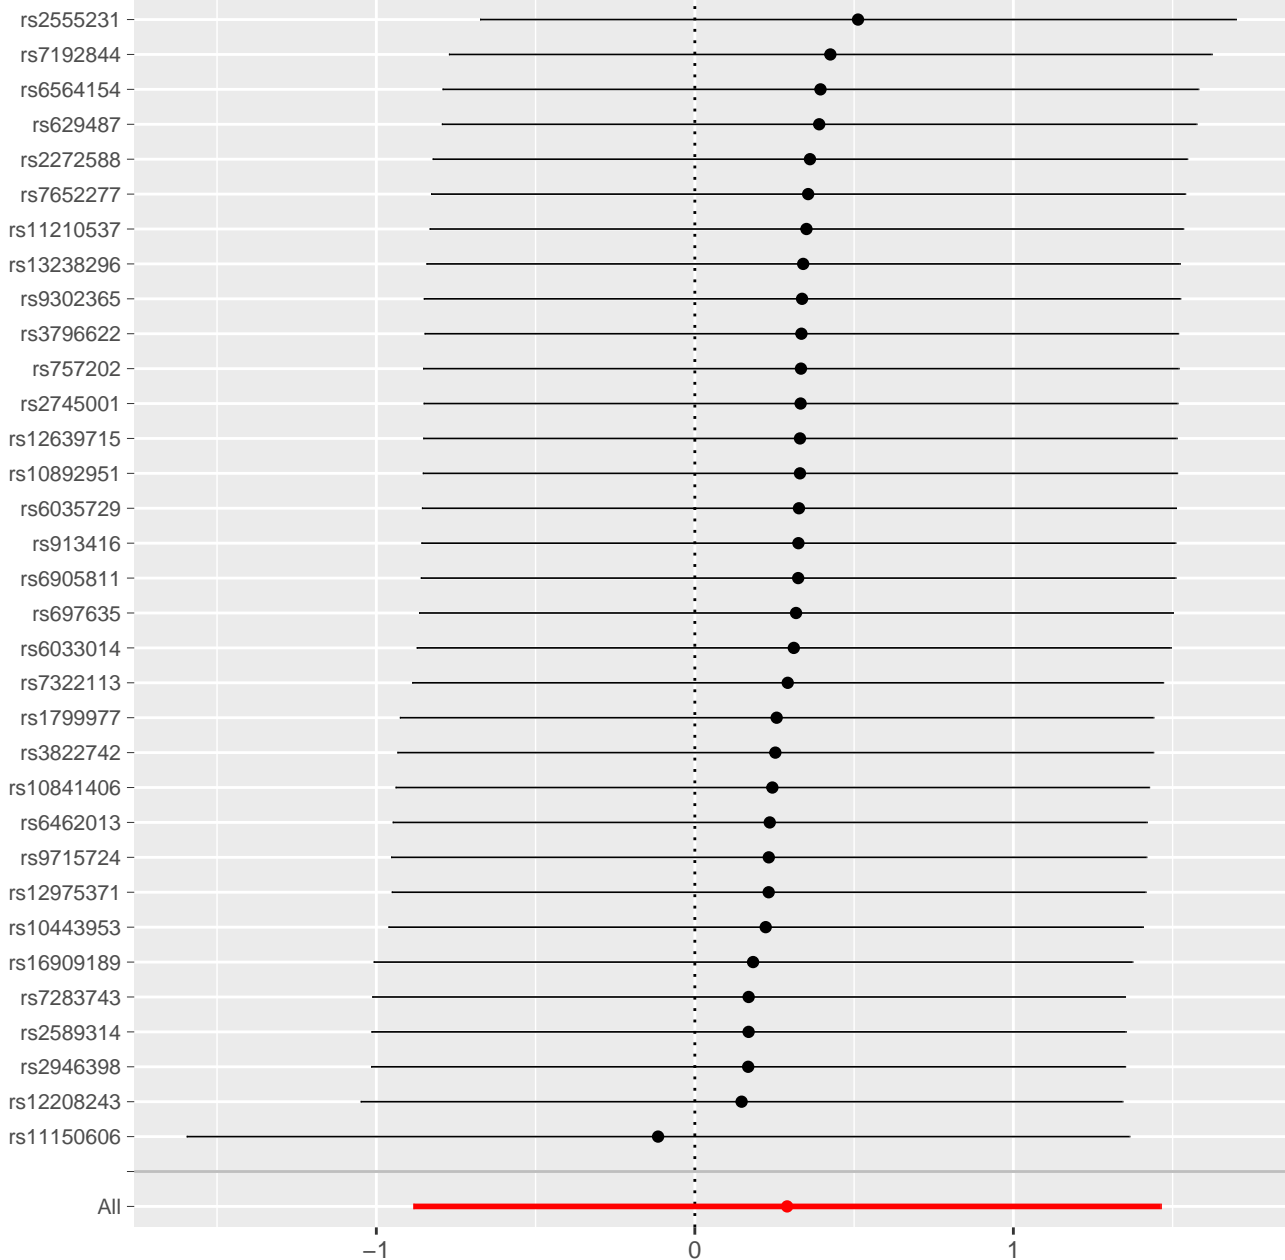

MR leave-one-out sensitivity analysis for 'M17945.metal.pos.txt.gz' on 'JUVEN\_ARTHR.gz'

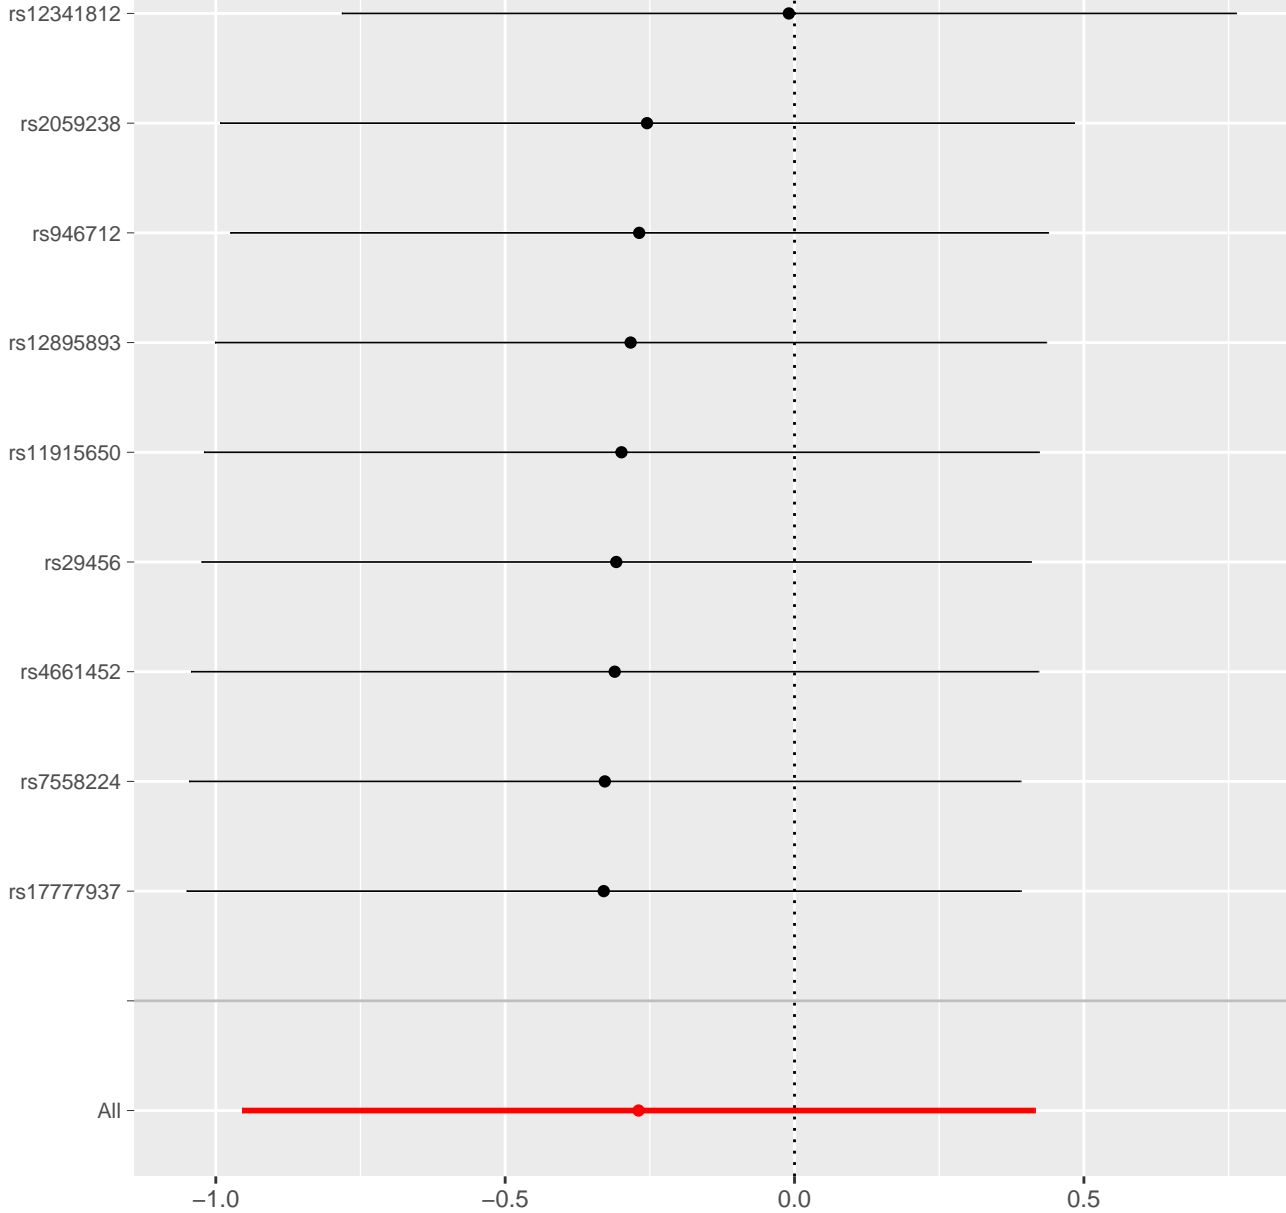

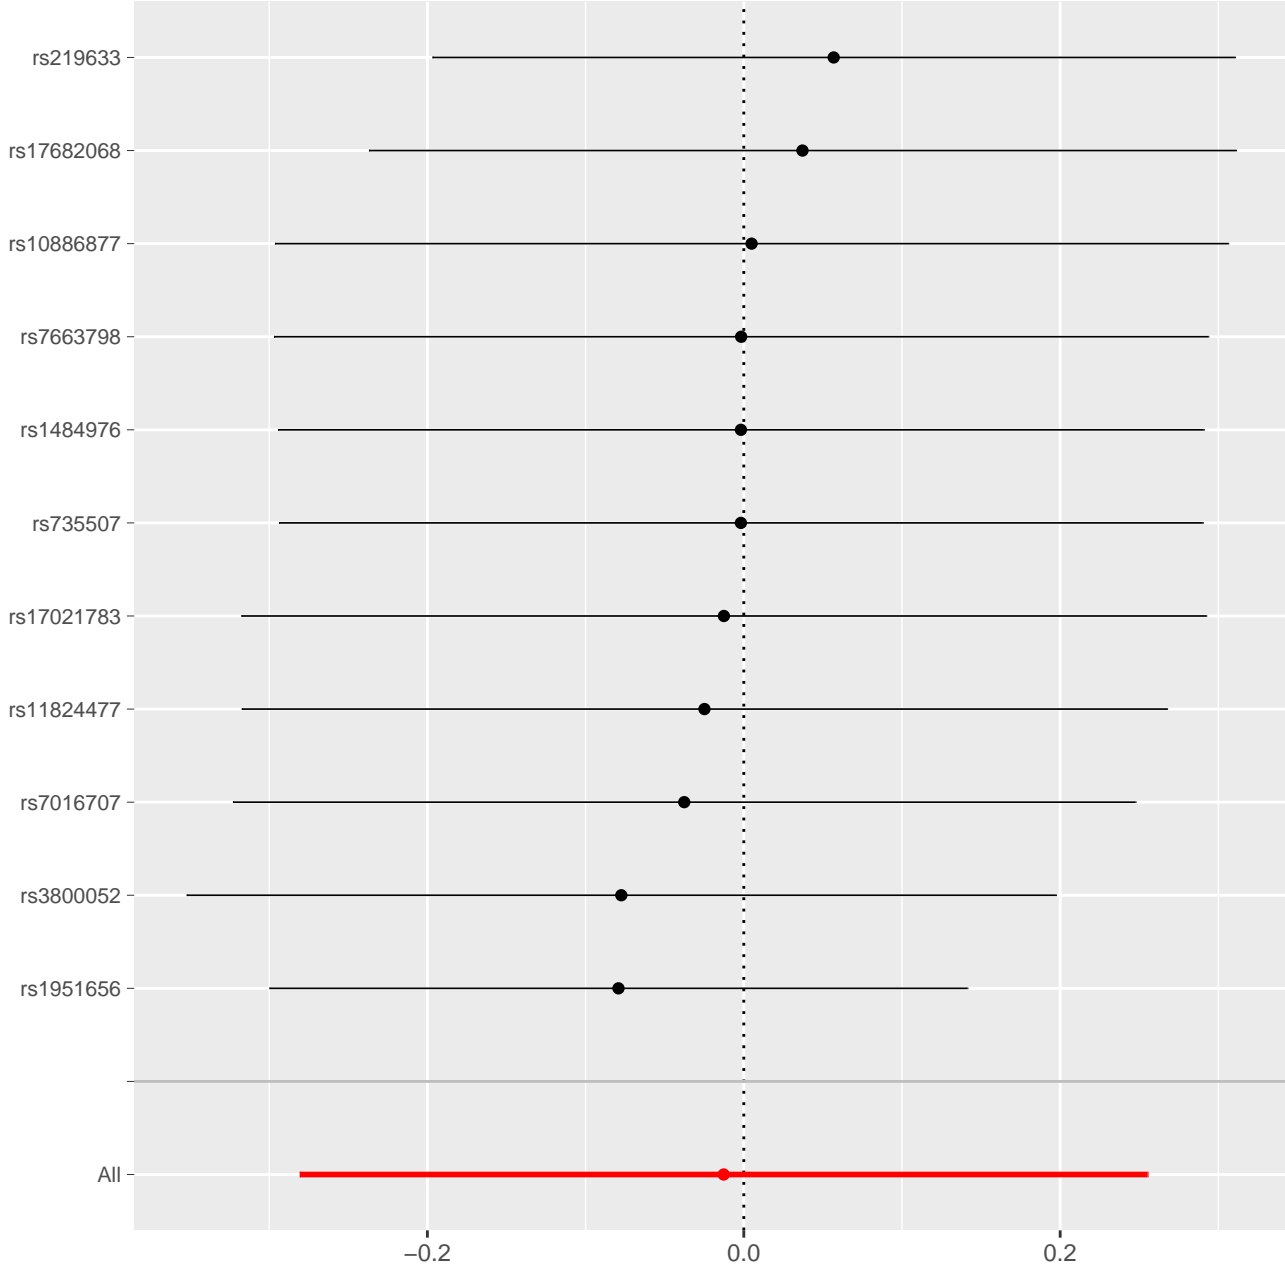

MR leave-one-out sensitivity analysis for 'M18281.metal.pos.txt.gz' on 'JUVEN\_ARTHR.gz'



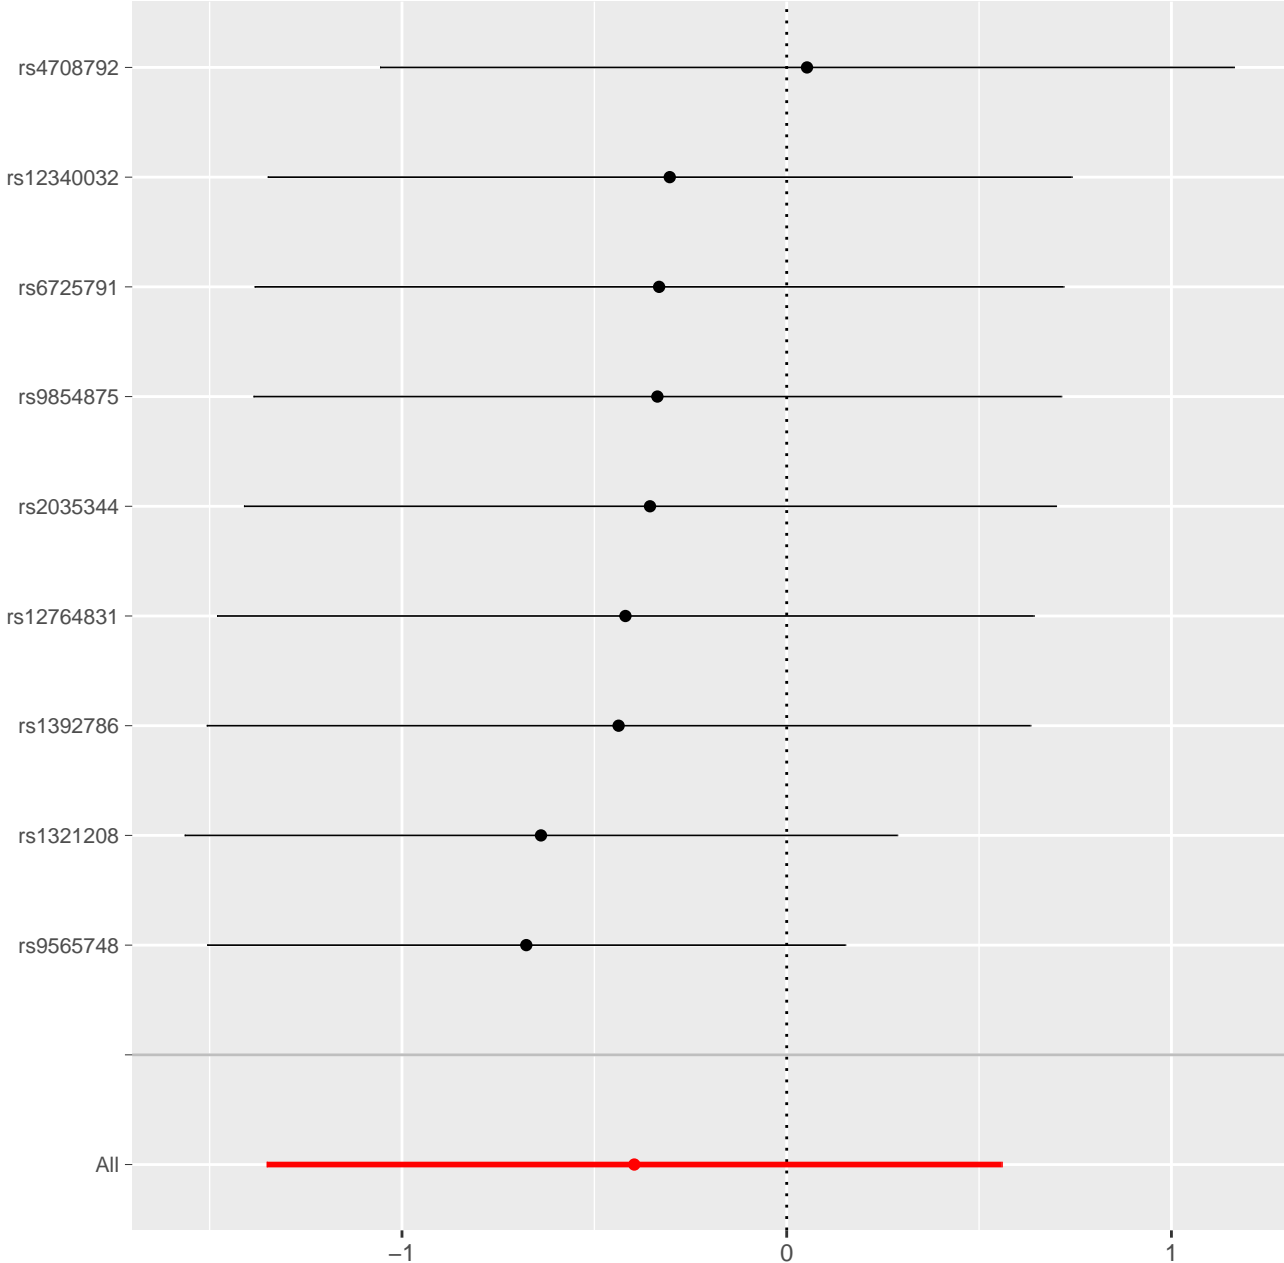

MR leave-one-out sensitivity analysis for 'M18283.metal.pos.txt.gz' on 'JUVEN\_ARTHR.gz'

rs521504

rs6955908

rs7088140

rs6999144

All

-1

0

1

MR leave-one-out sensitivity analysis for  
'M18335.metal.pos.txt.gz' on 'JUVEN\_ARTHR.gz'

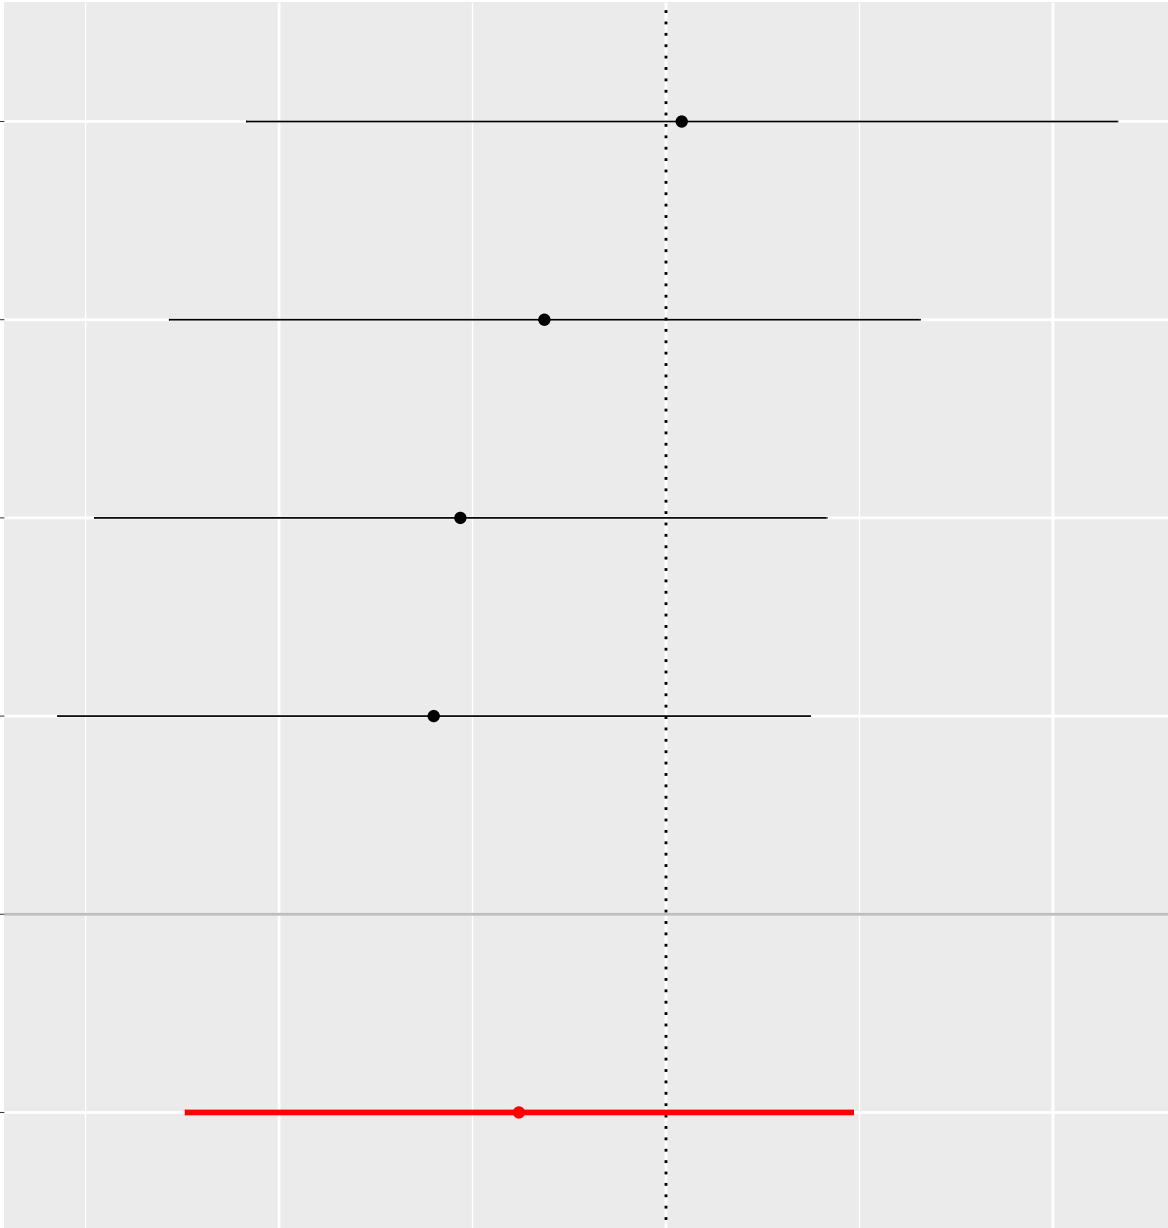

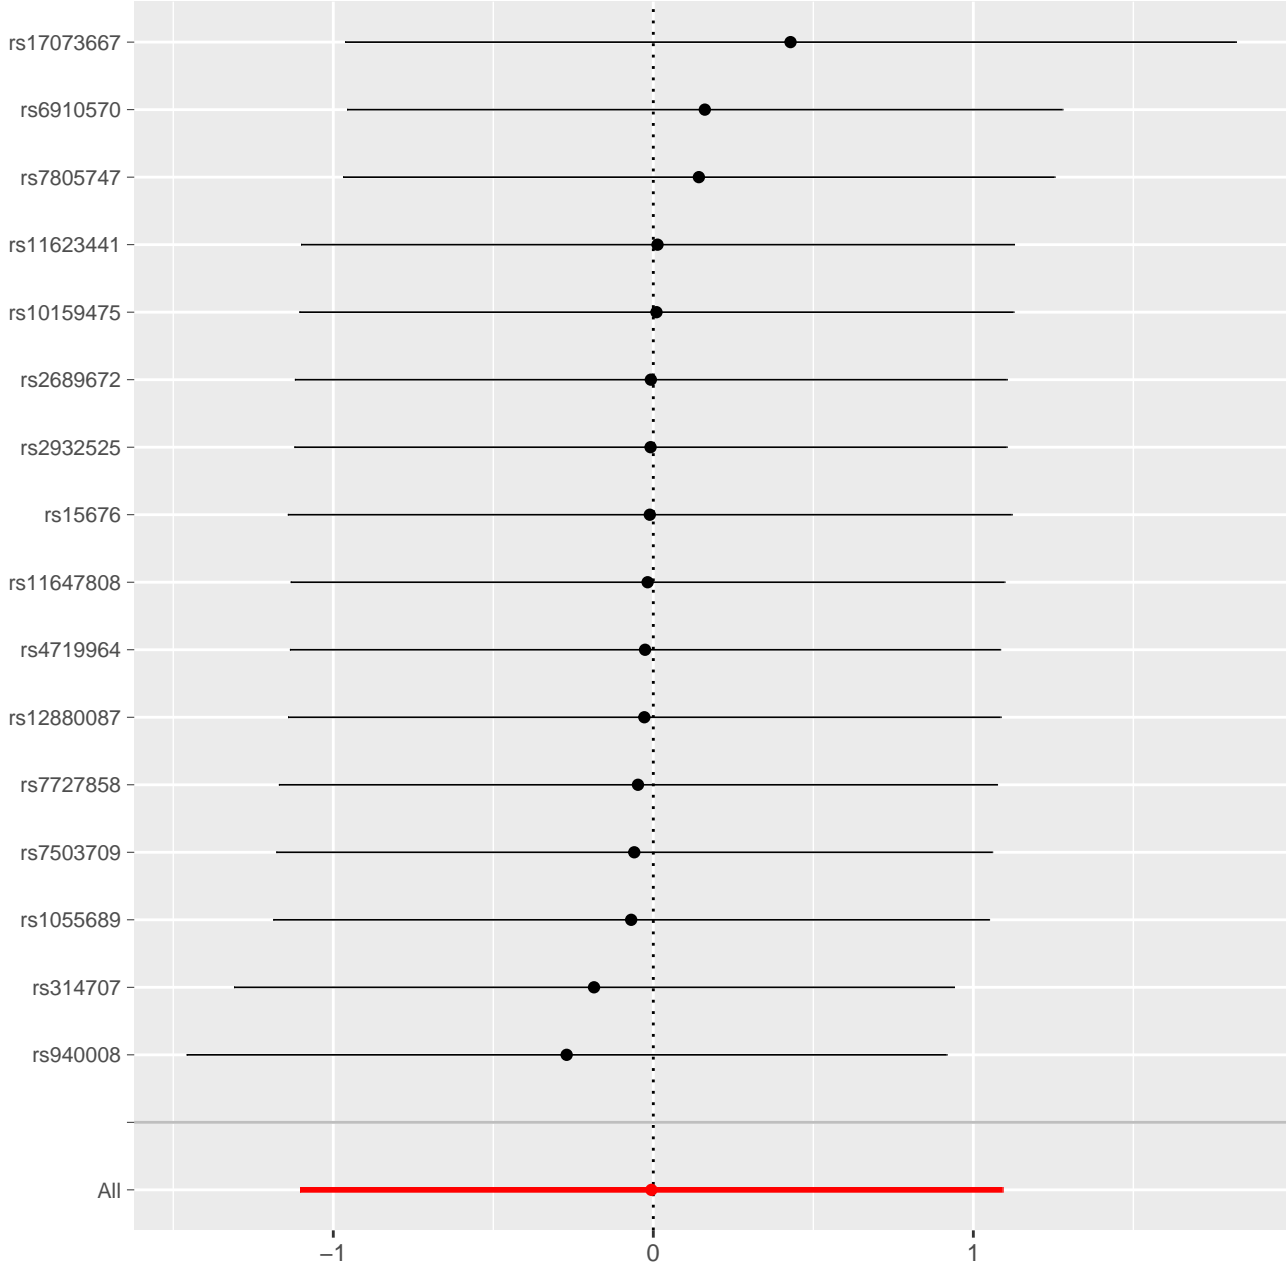

MR leave-one-out sensitivity analysis for 'M18349.metal.pos.txt.gz' on 'JUVEN\_ARTHR.gz'

rs7697449  
rs17092360  
rs4905425  
rs17498524  
rs3846242  
rs1772858  
All

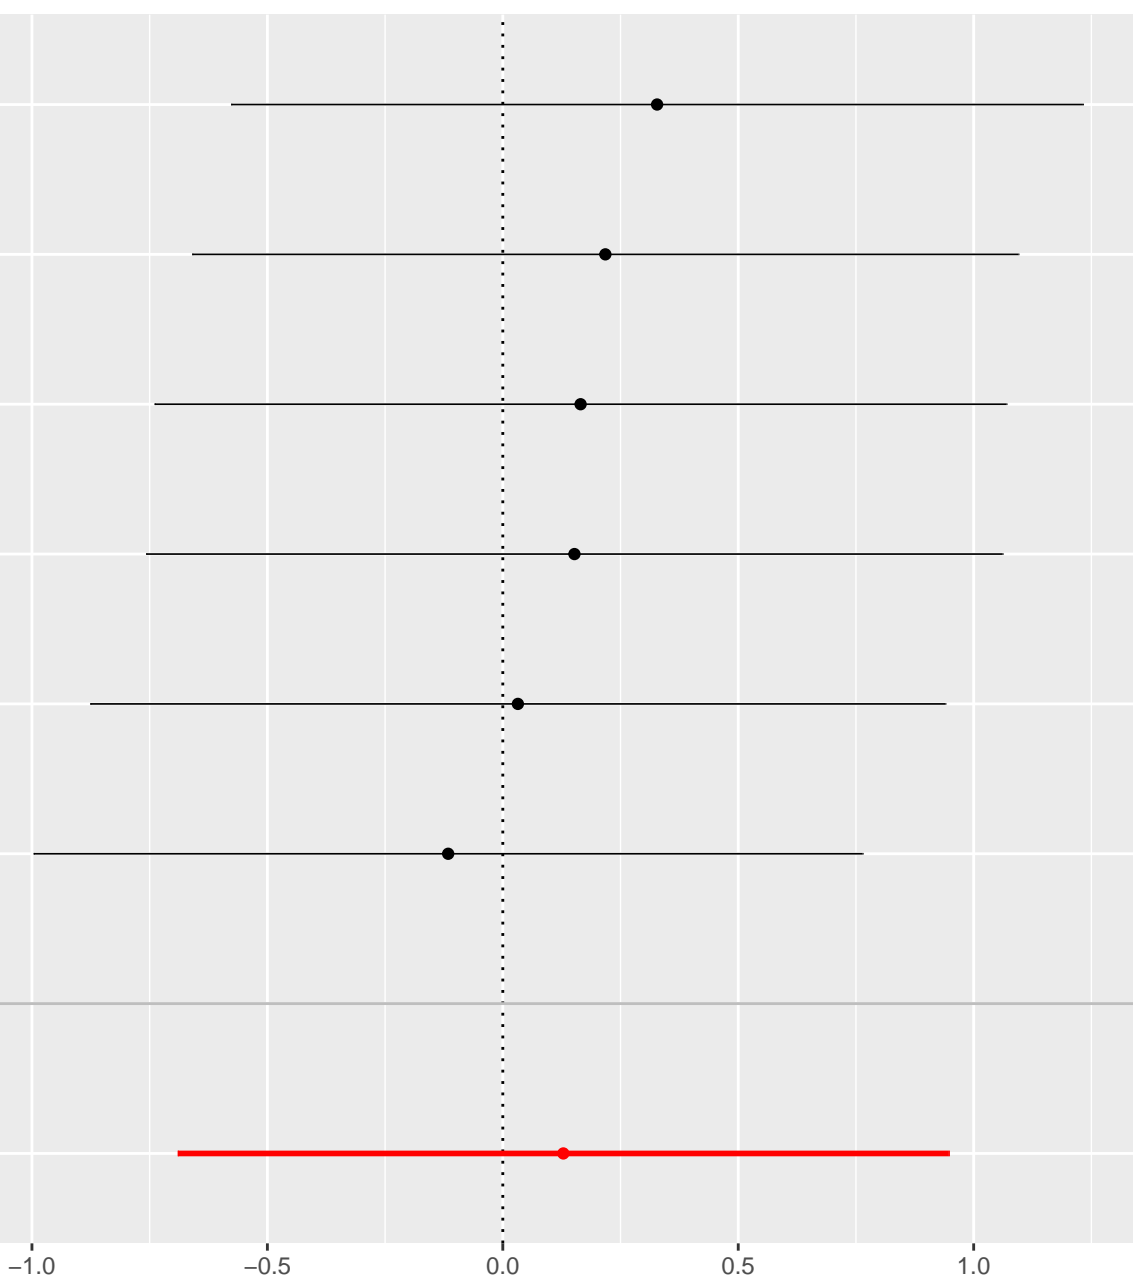

MR leave-one-out sensitivity analysis for 'M18357.metal.pos.txt.gz' on 'JUVEN\_ARTHR.gz'

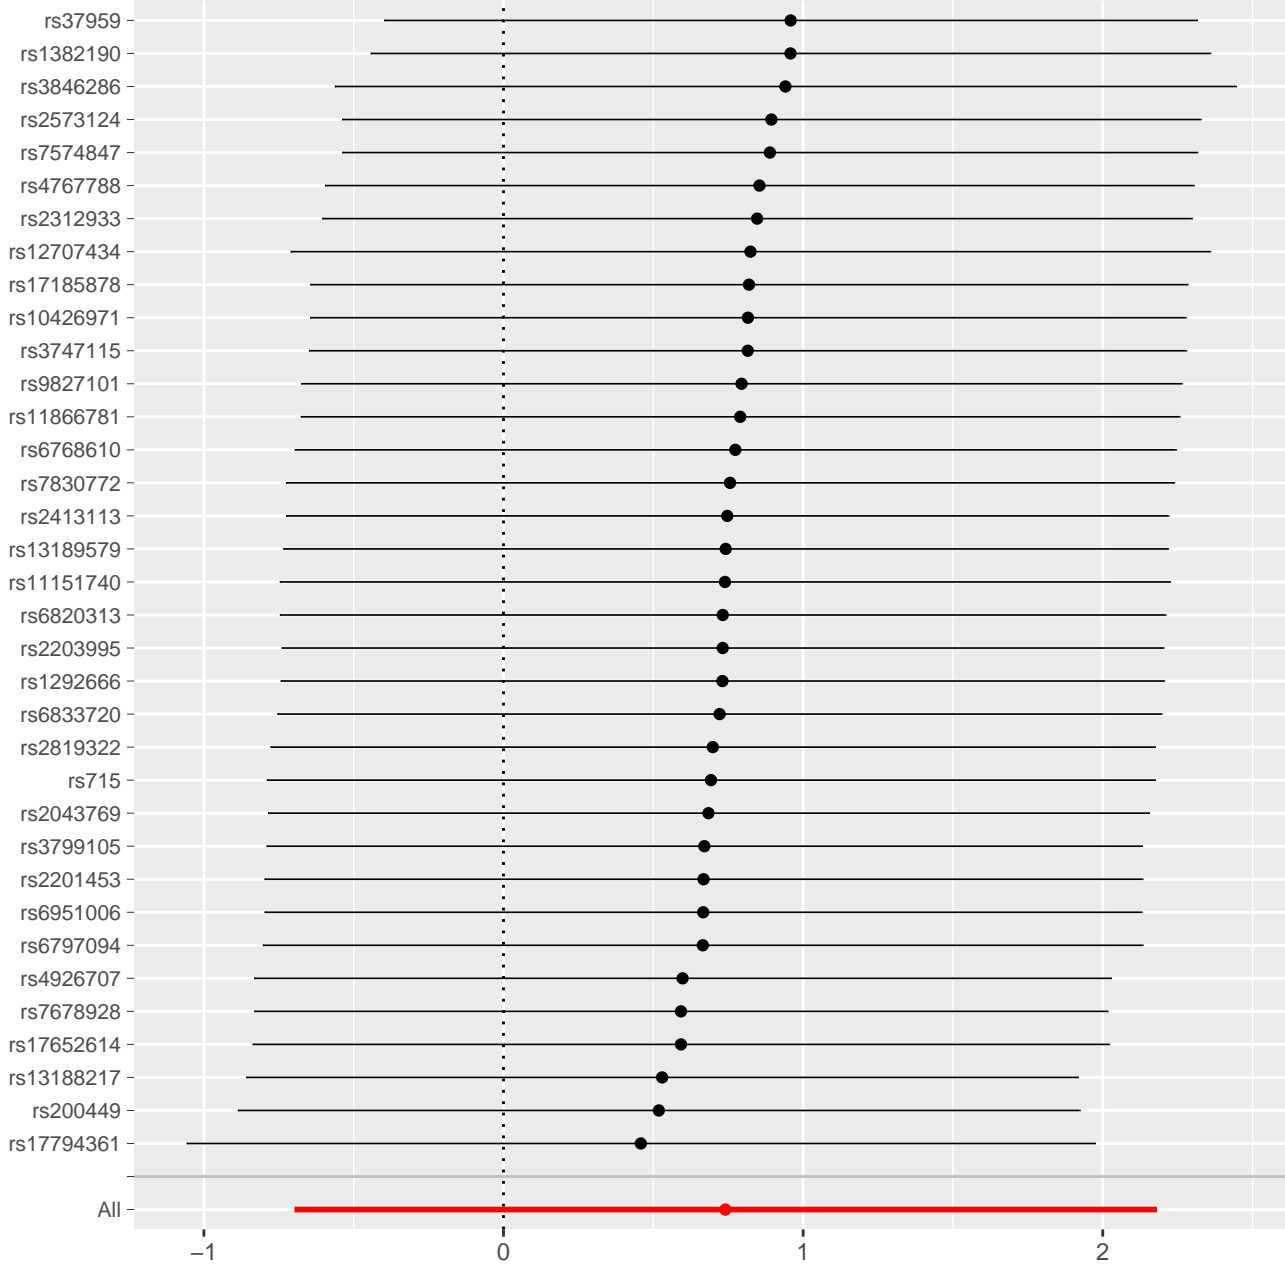

MR leave-one-out sensitivity analysis for 'M18369.metal.pos.txt.gz' on 'JUVEN\_ARTHR.gz'

rs4410790

rs3846406

rs2081811

All

-4

-2

0

2

MR leave-one-out sensitivity analysis for  
'M18392.metal.pos.txt.gz' on 'JUVEN\_ARTHR.gz'

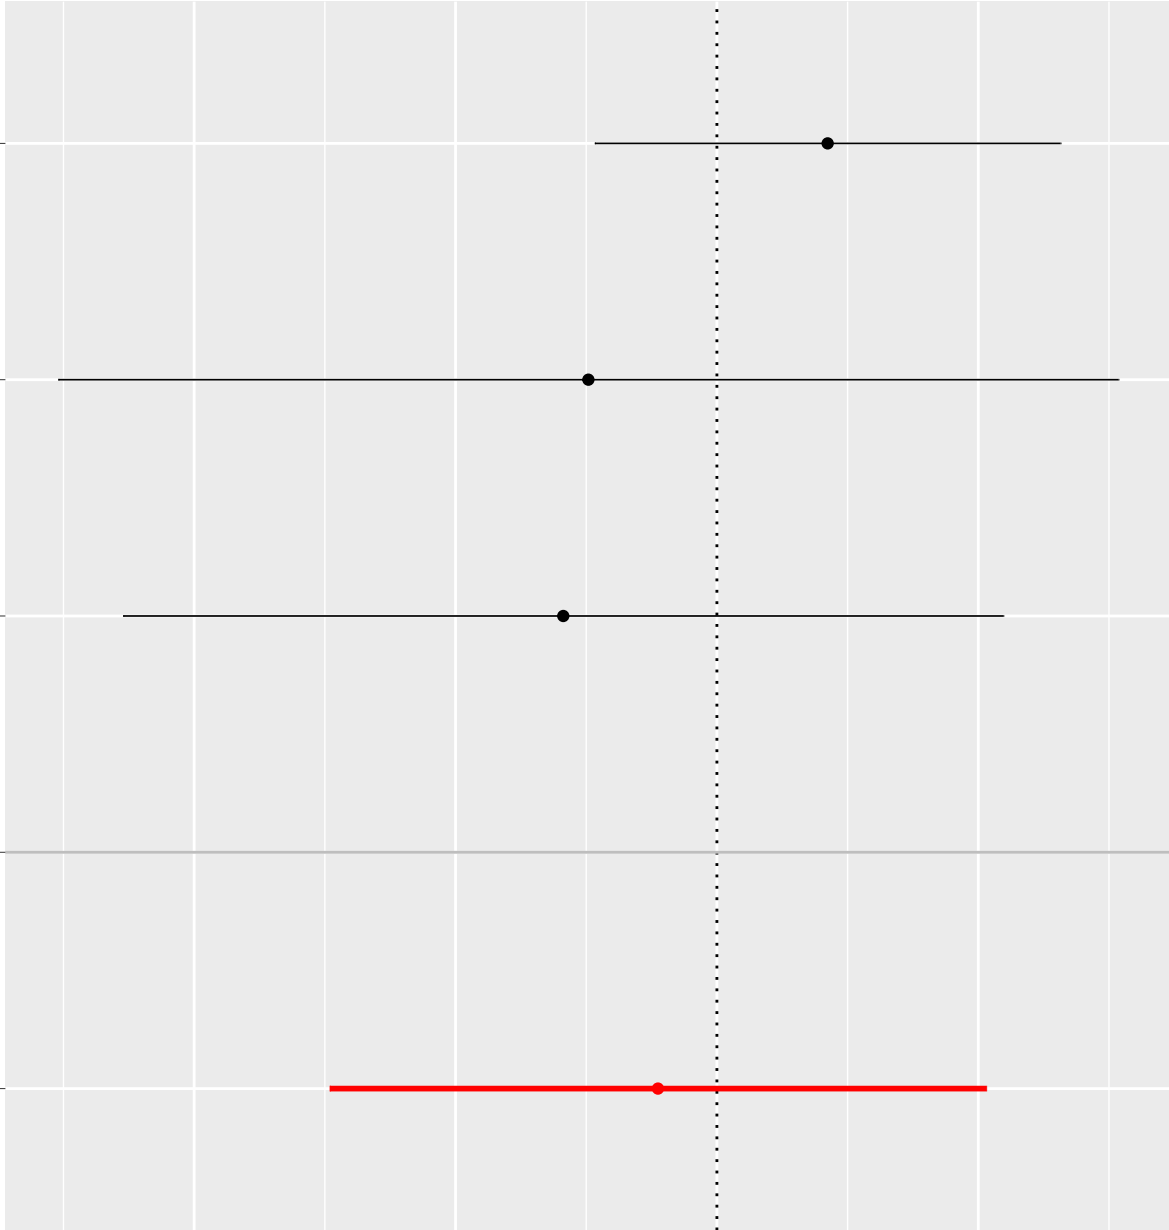

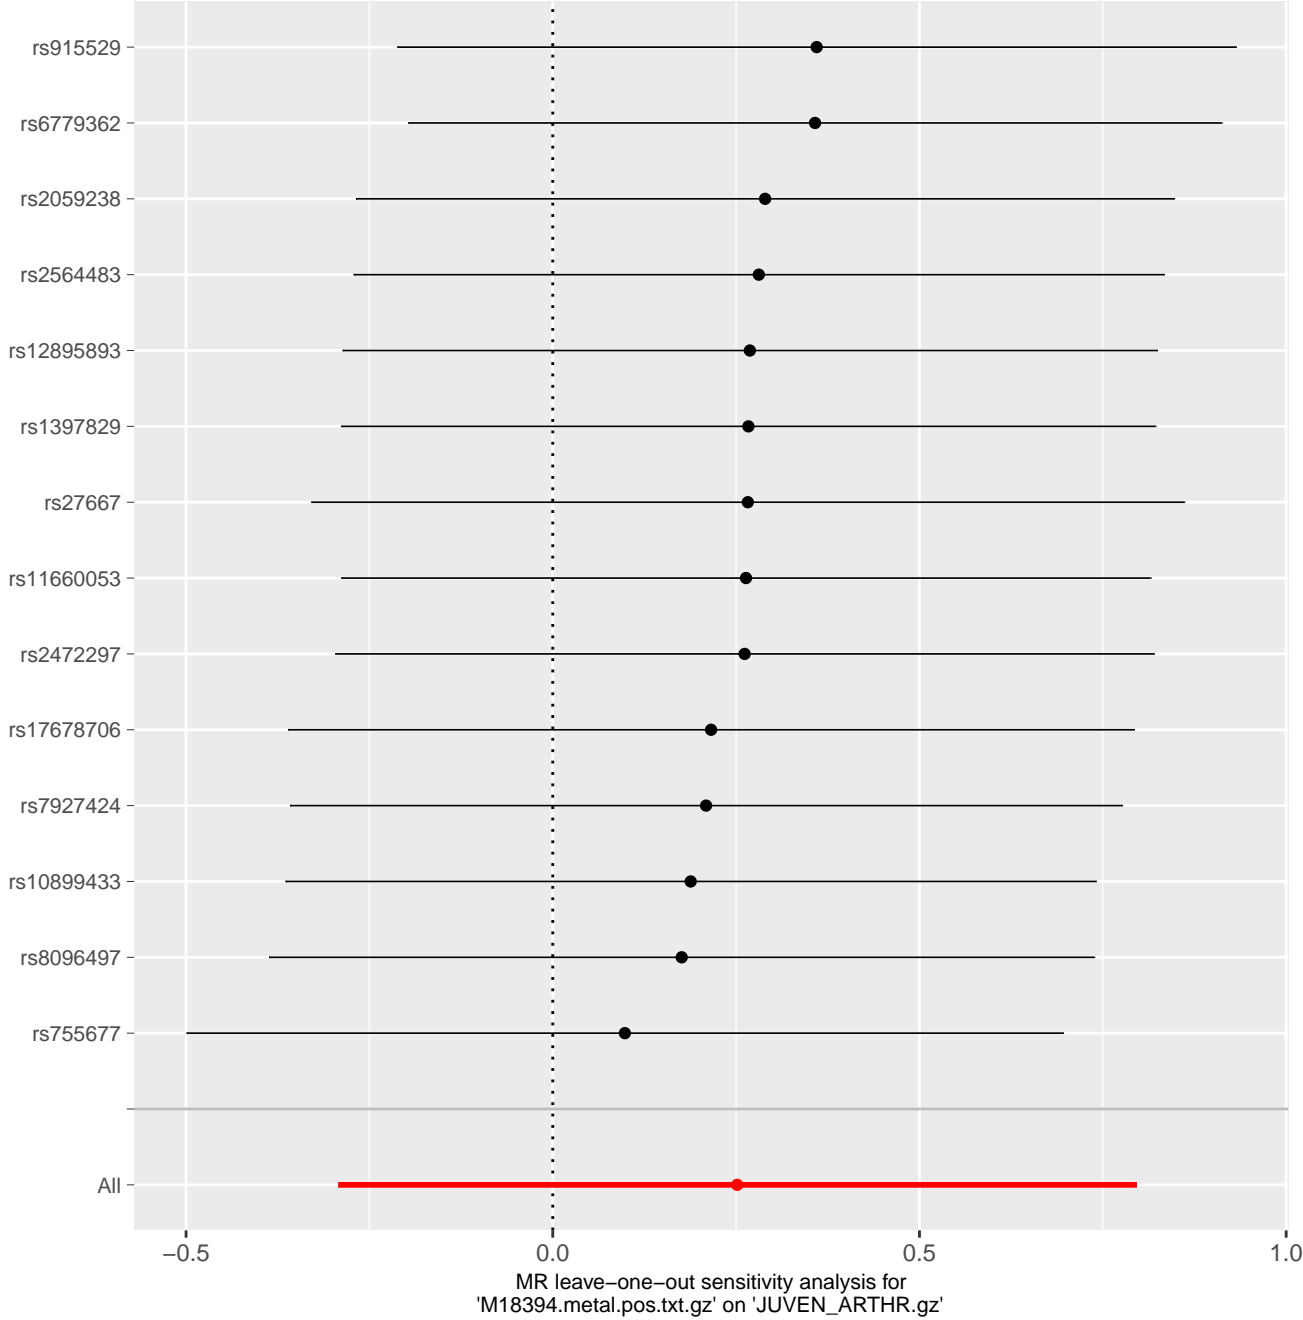

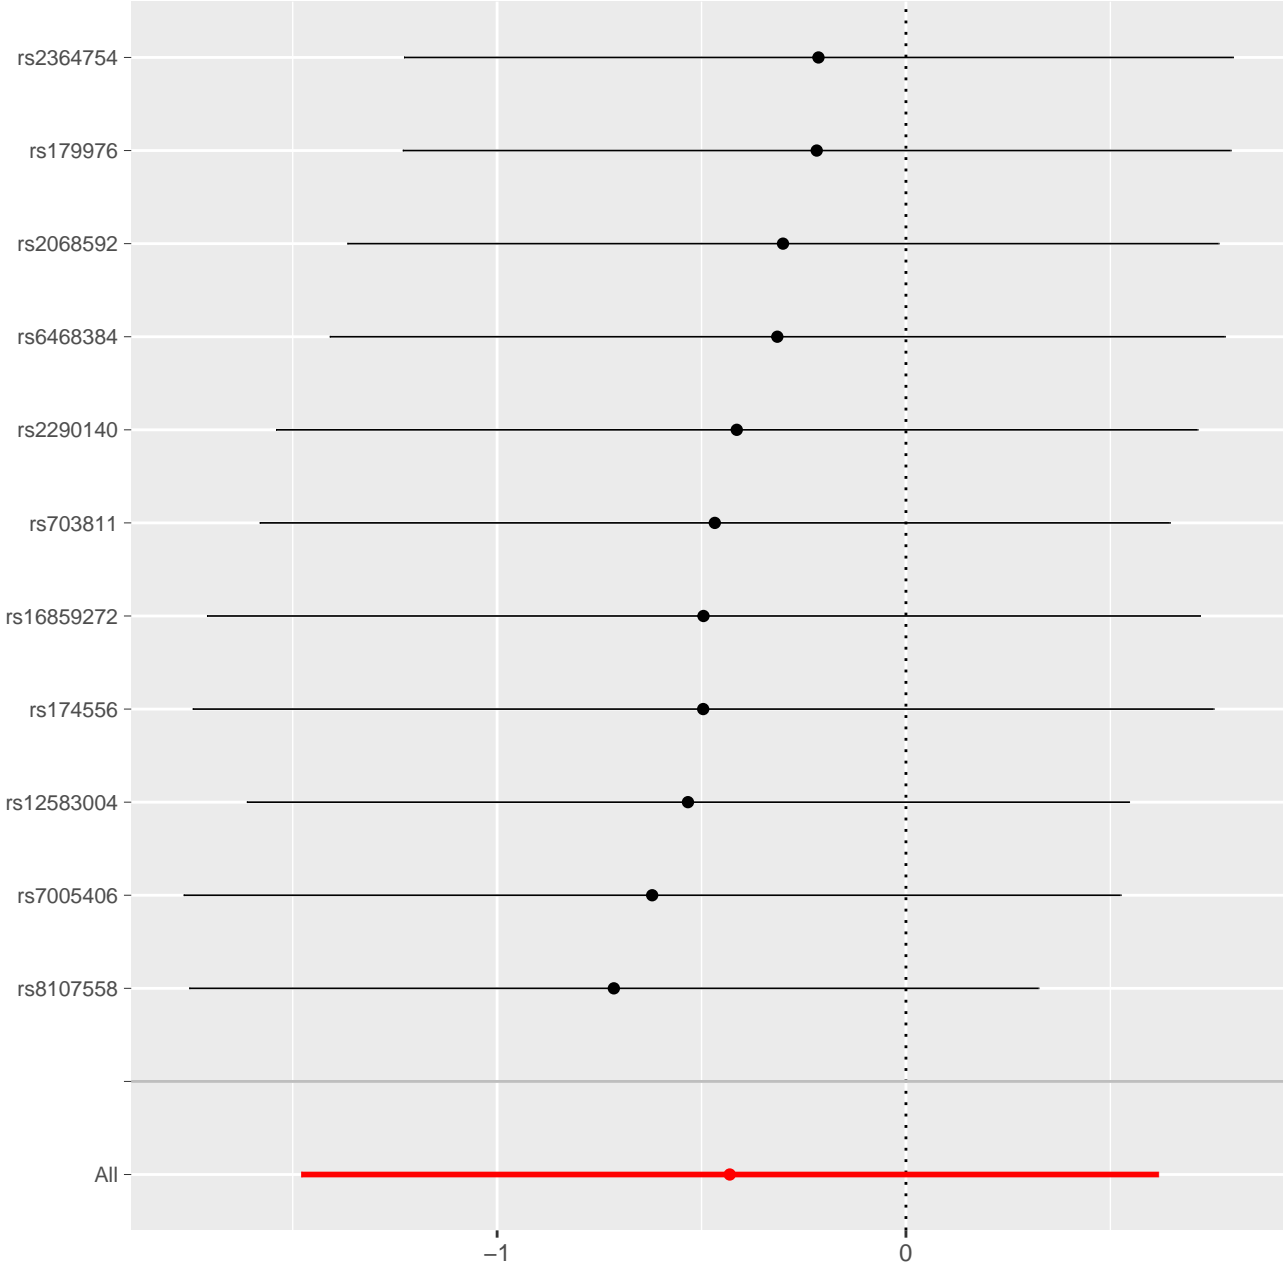

MR leave-one-out sensitivity analysis for 'M18467.metal.pos.txt.gz' on 'JUVEN\_ARTHR.gz'



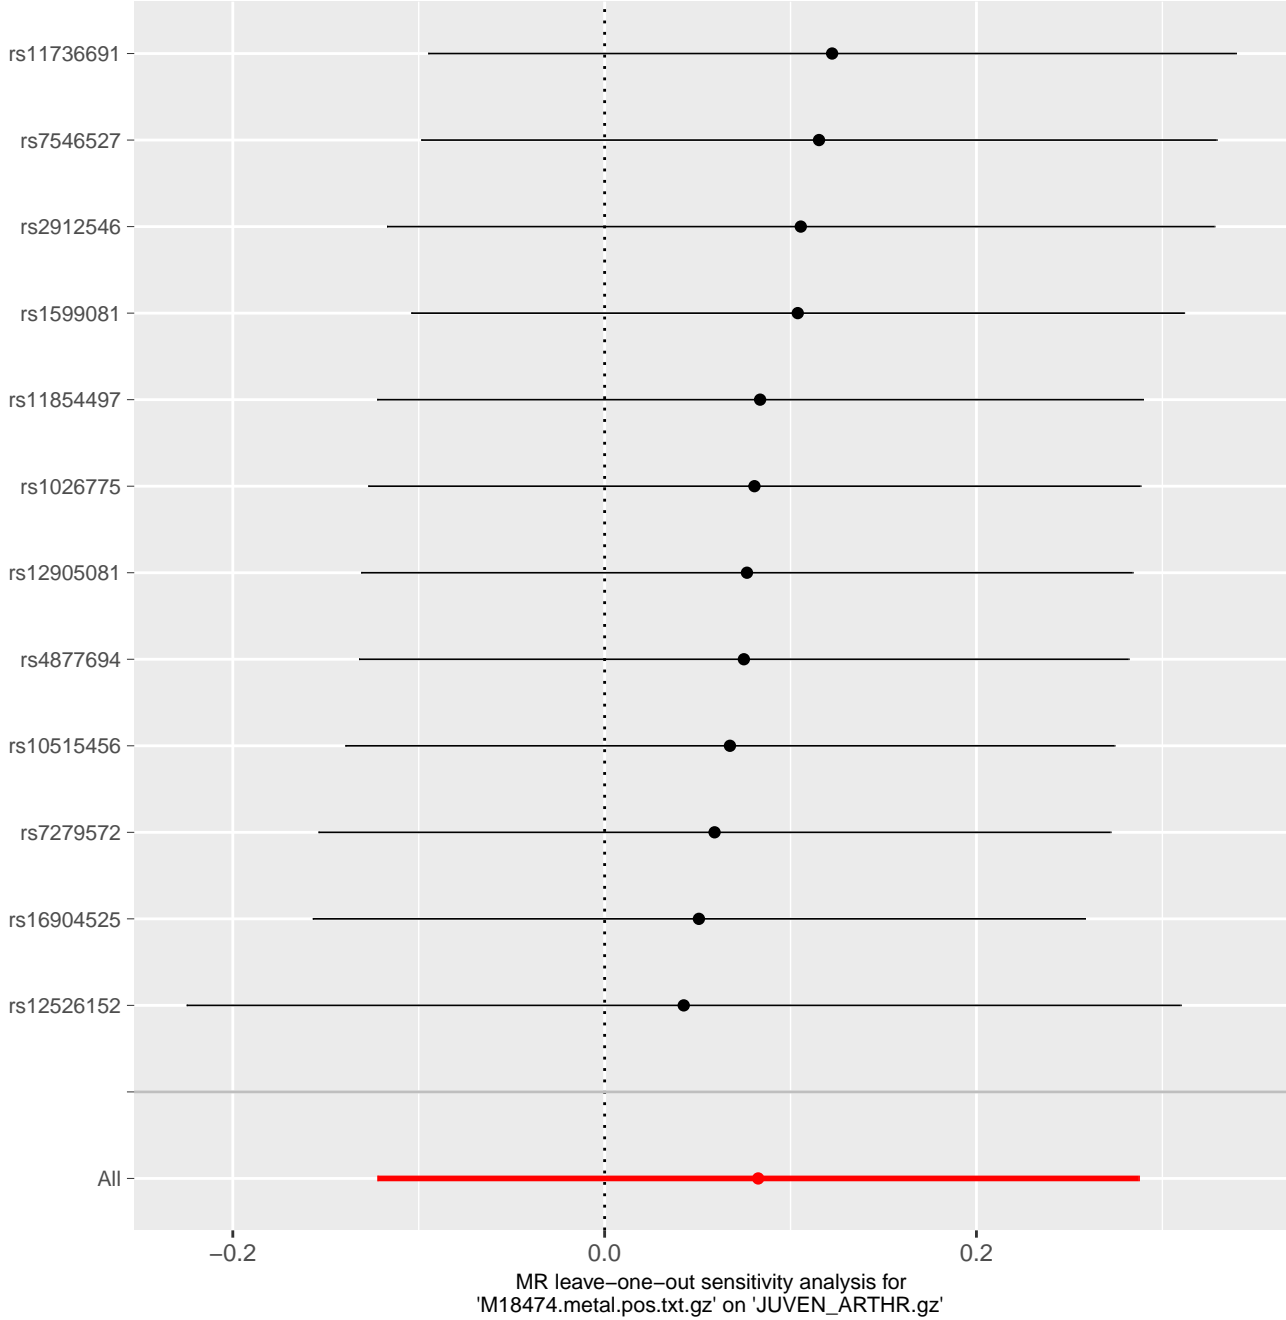

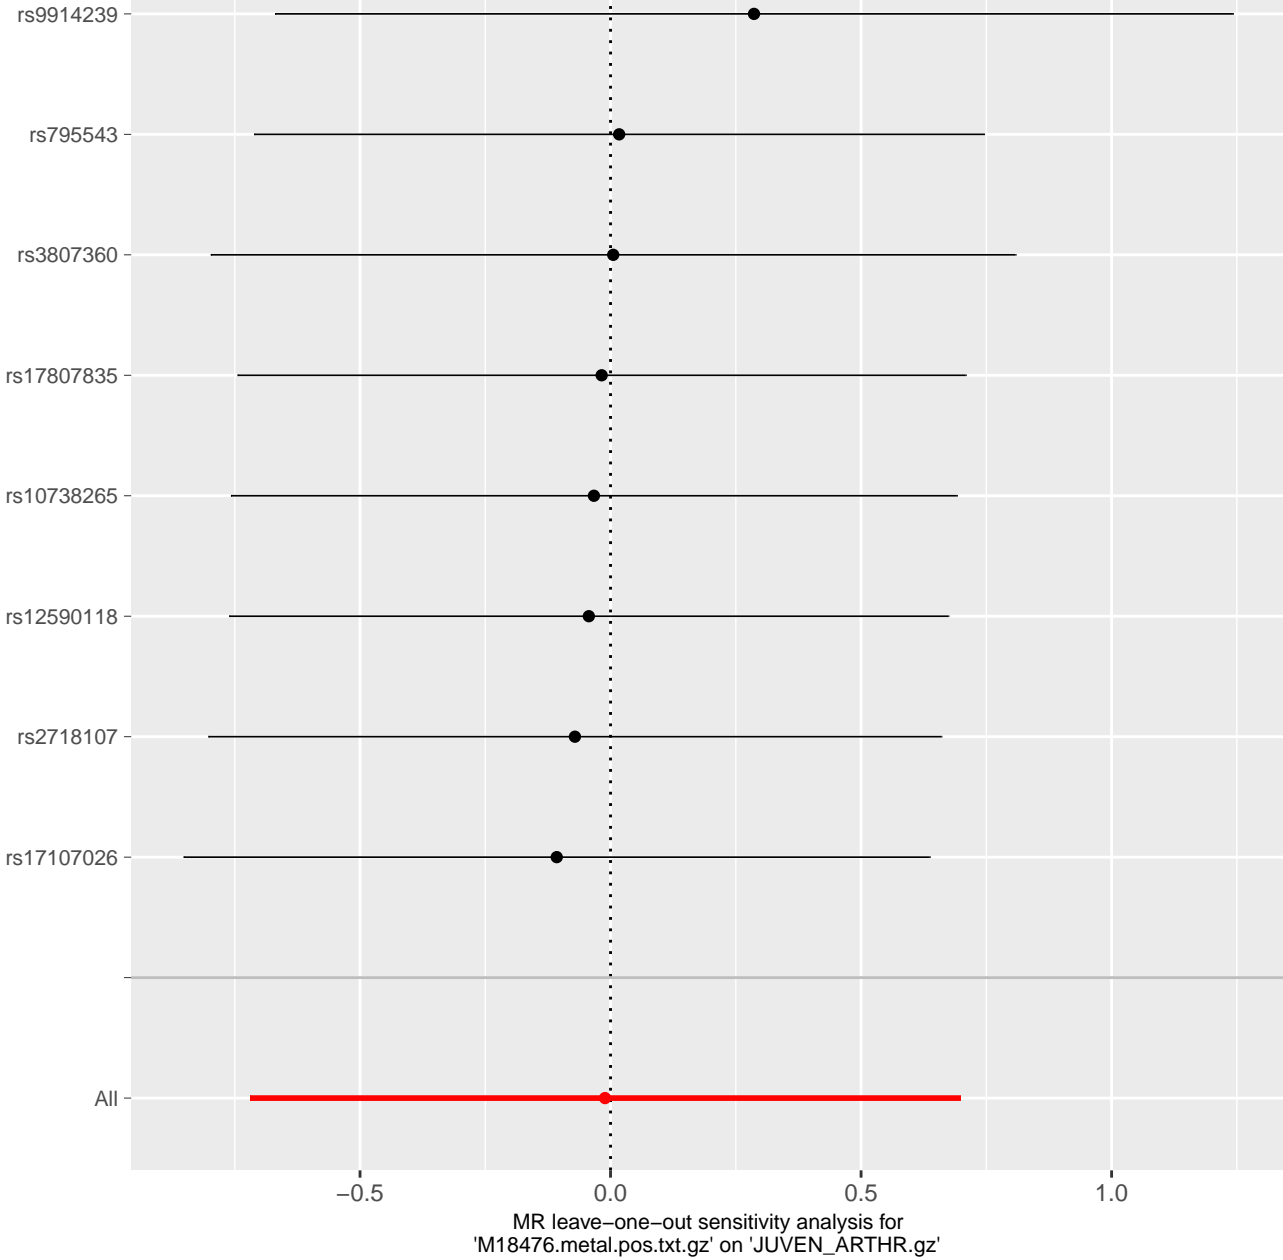

rs7856830  
rs17746543  
rs4338010  
rs9301881  
rs2420201  
rs806784  
All

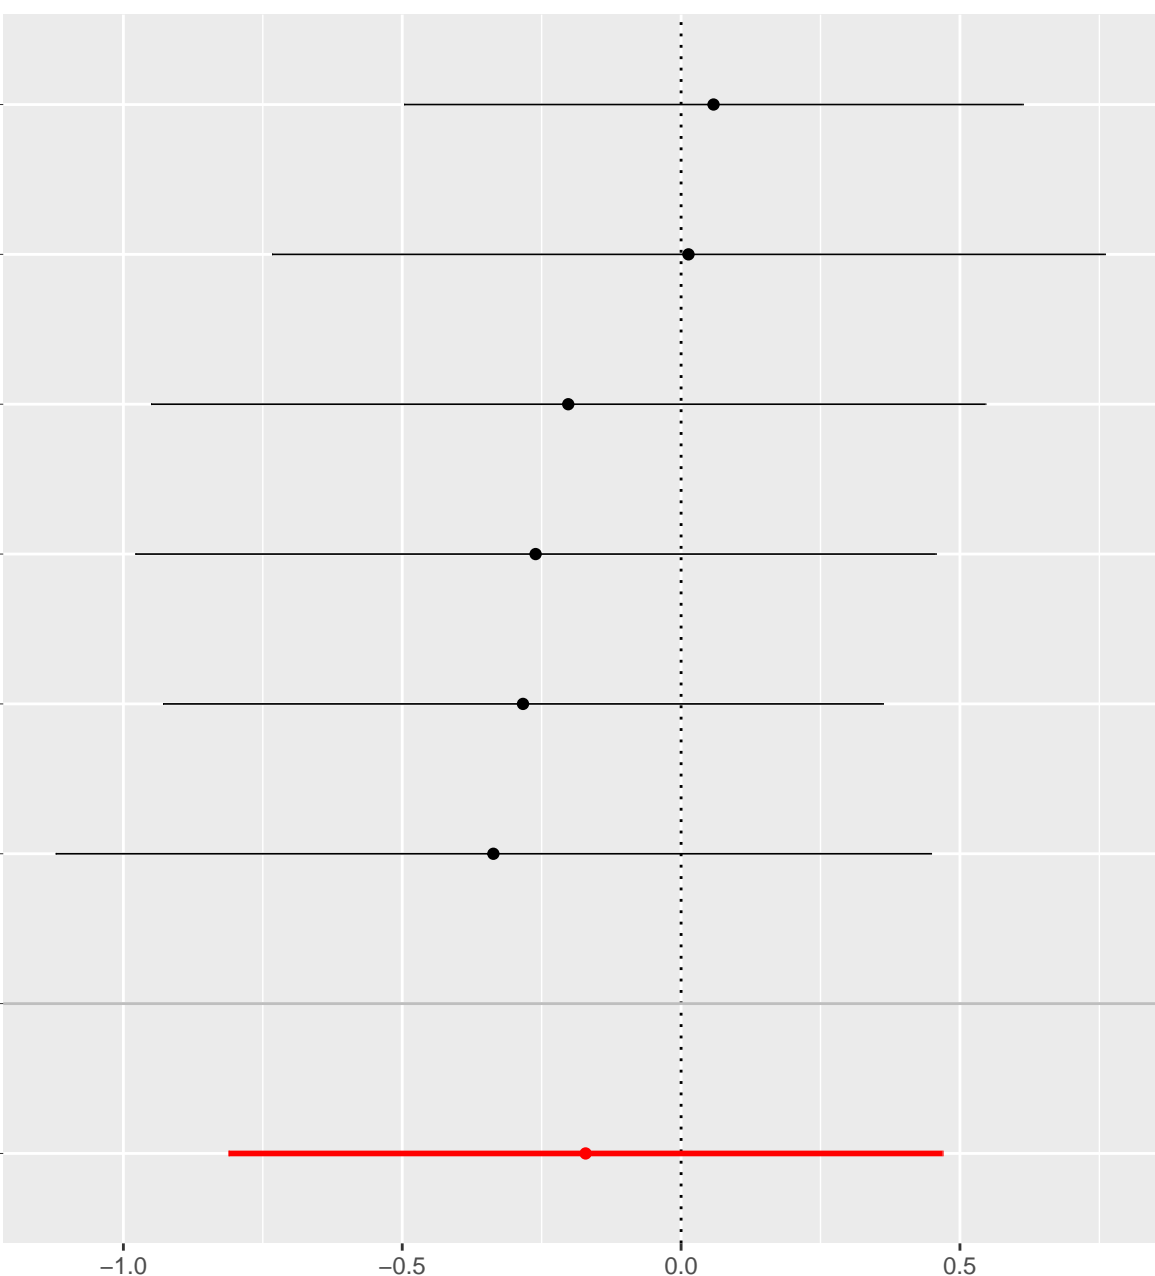

MR leave-one-out sensitivity analysis for 'M18477.metal.pos.txt.gz' on 'JUVEN\_ARTHR.gz'

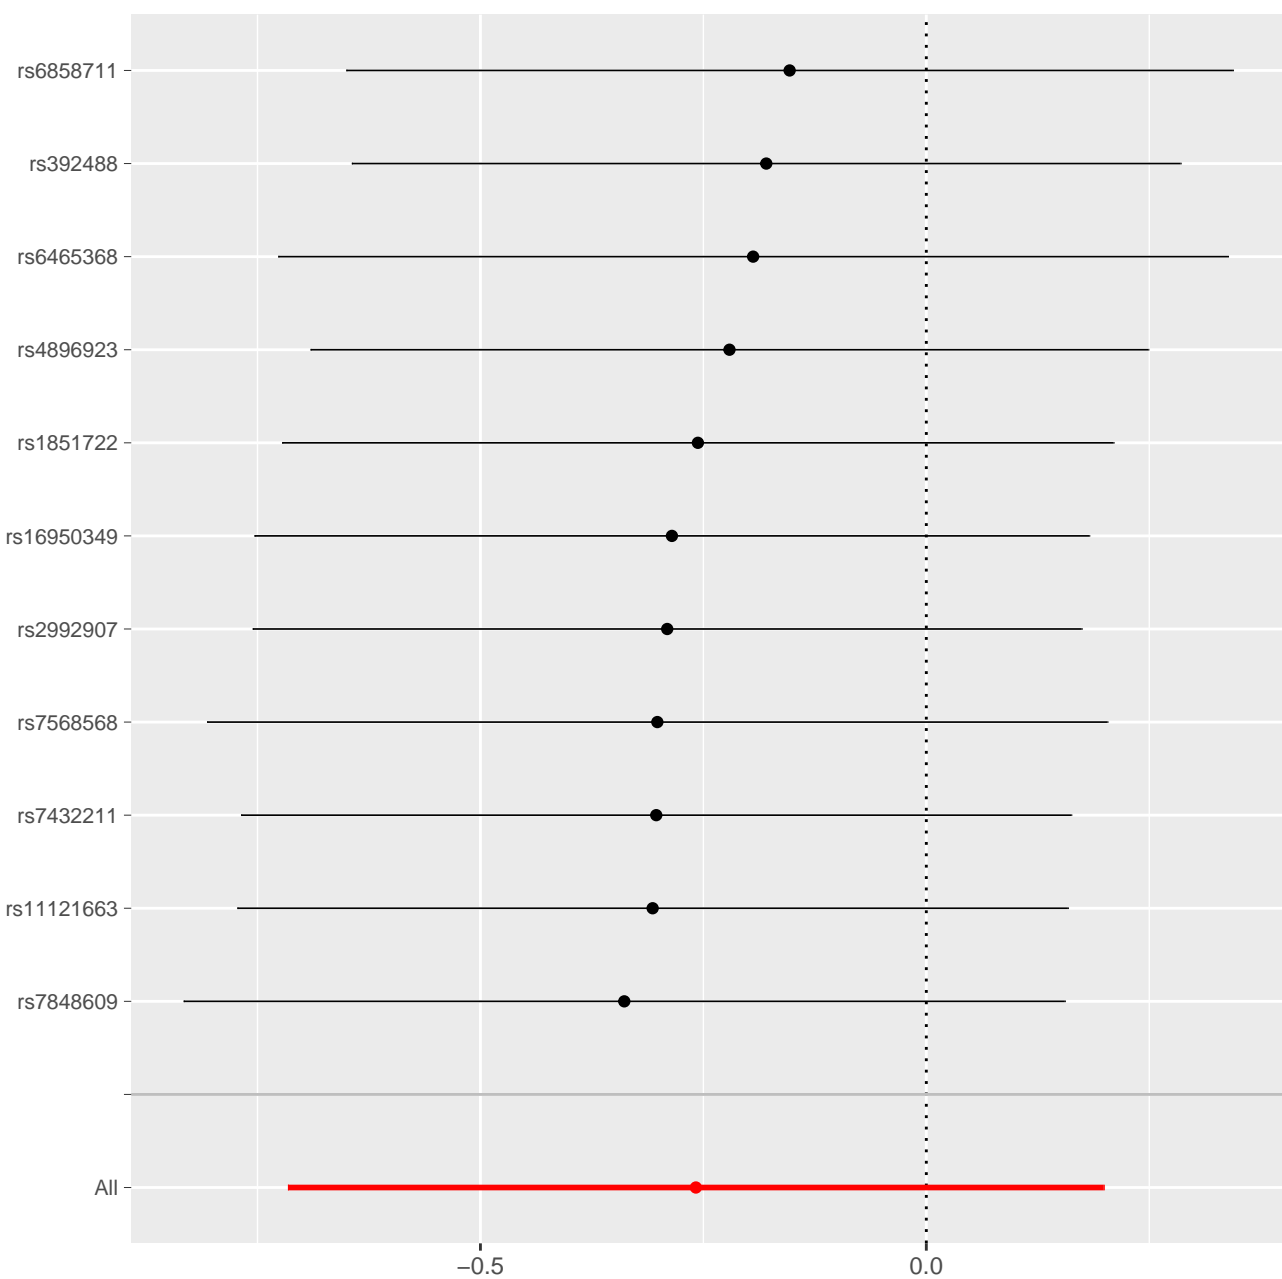

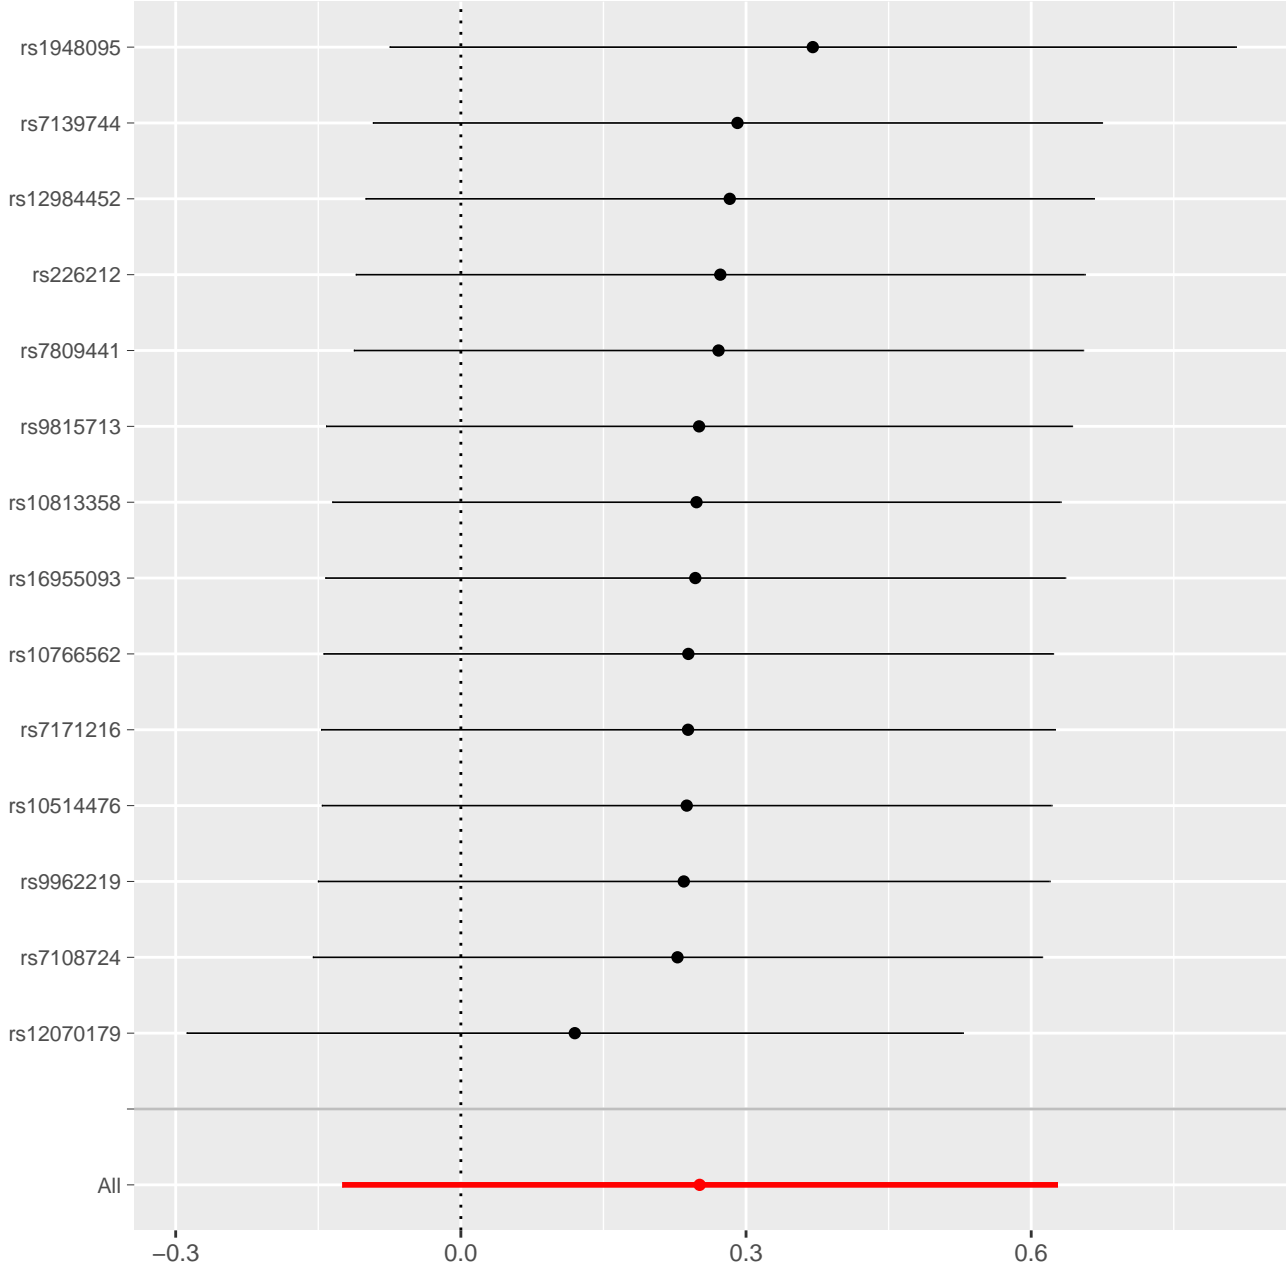

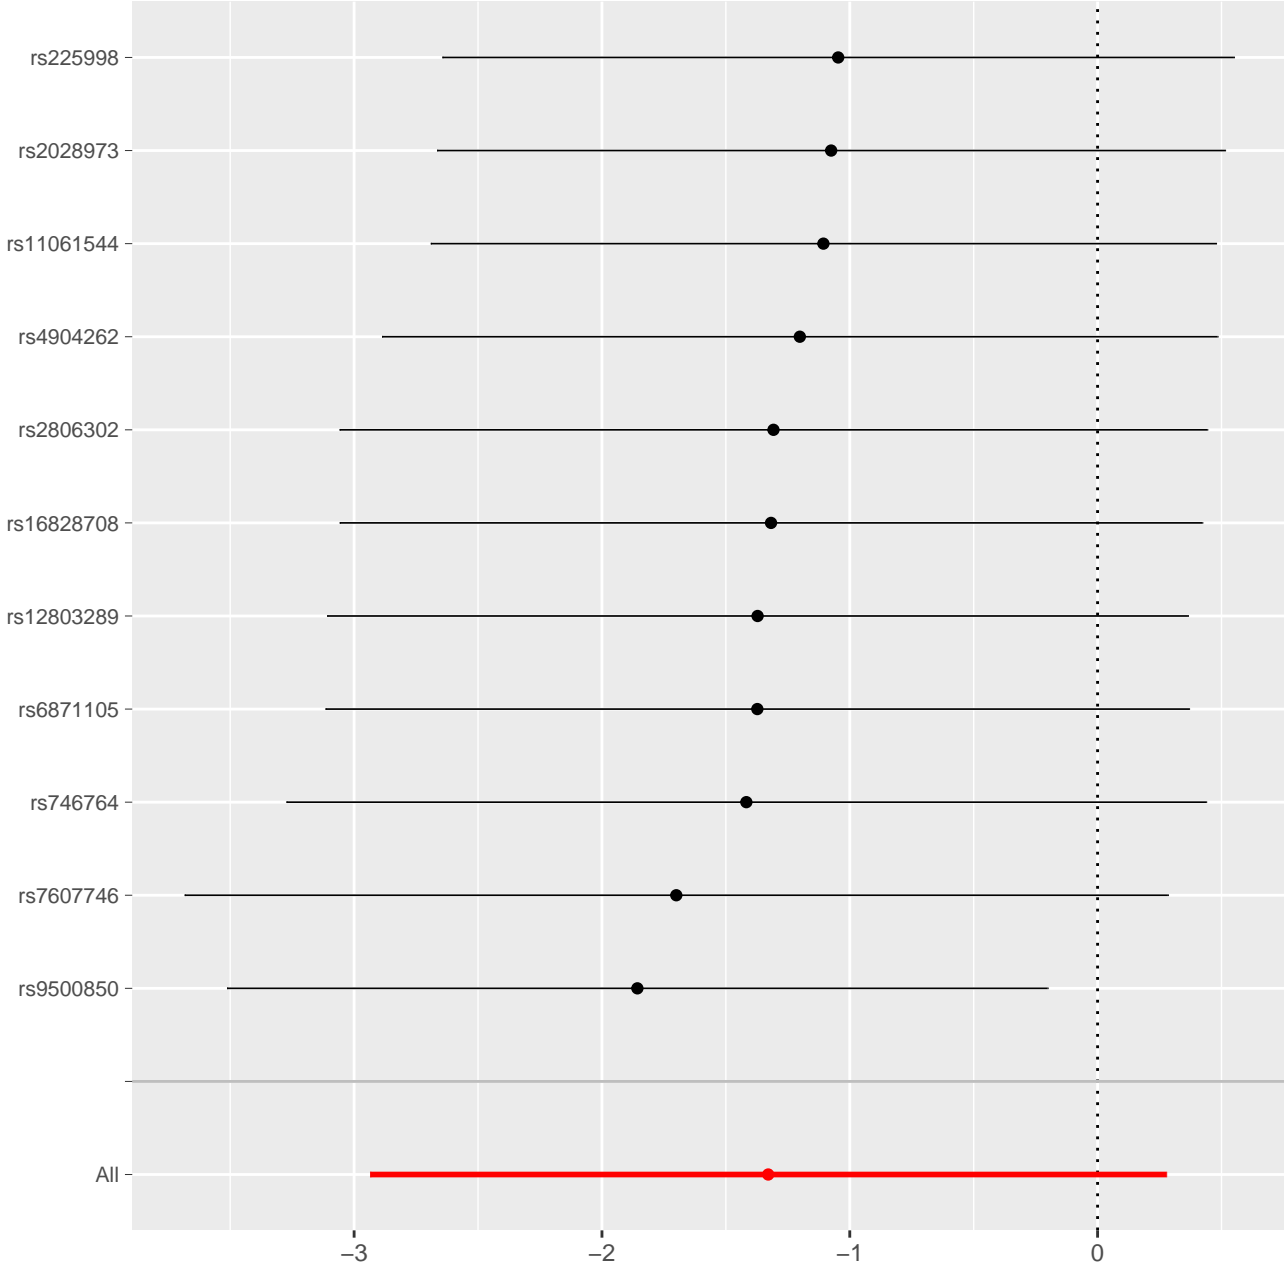

rs10063514

rs10788823

rs12583004

rs728634

rs1808751

All

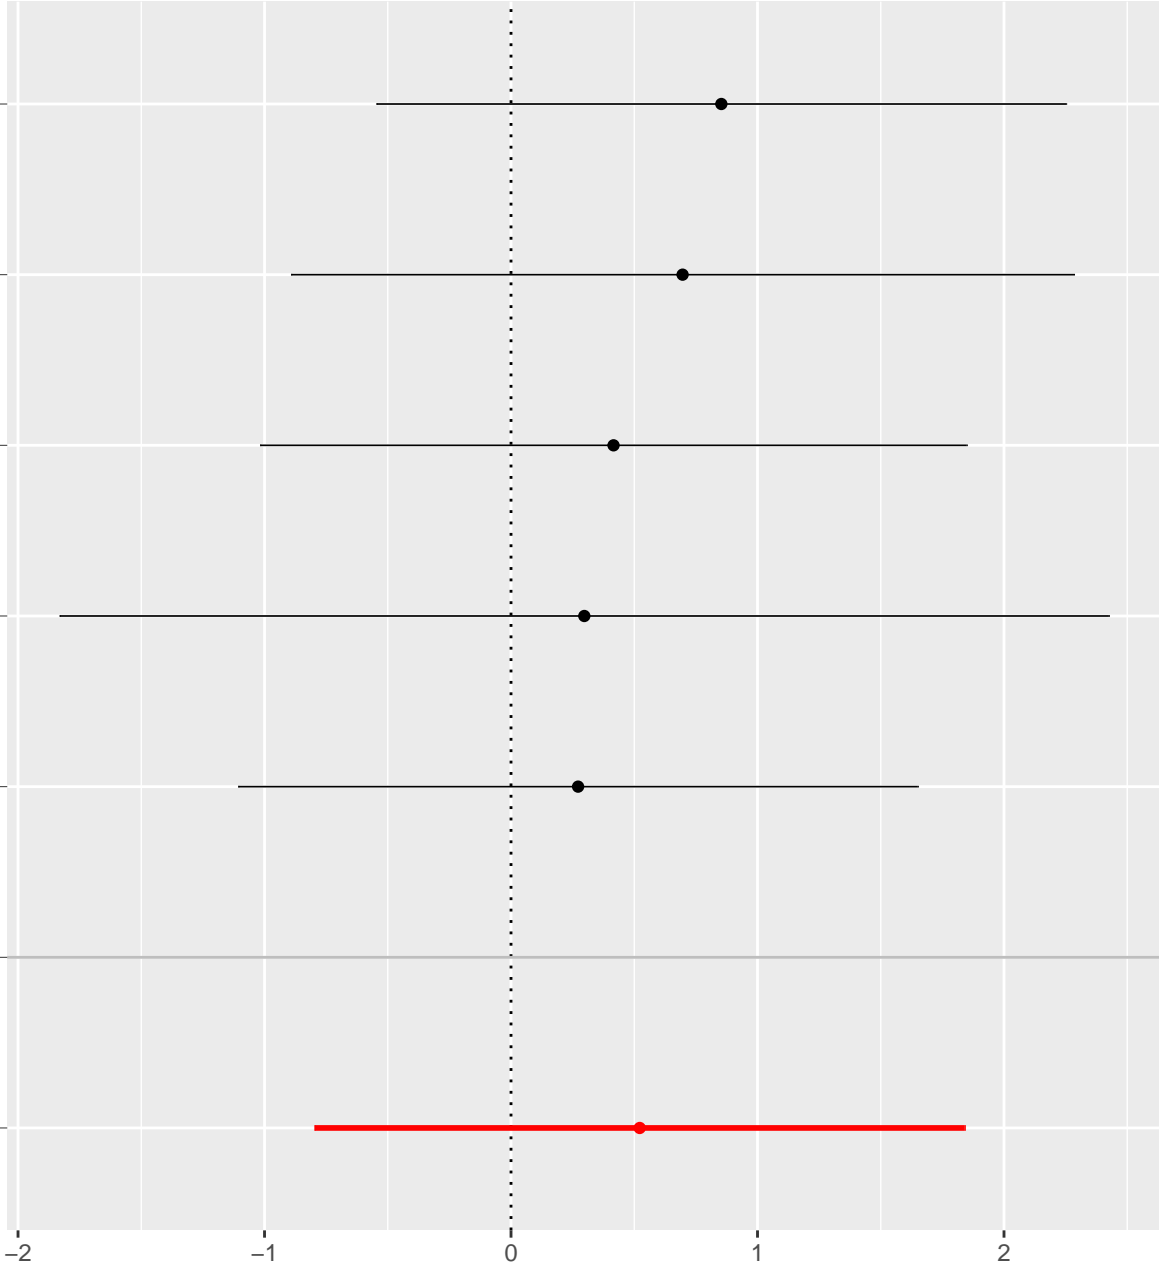

rs10501089

rs8107558

rs10491073

rs1925409

All

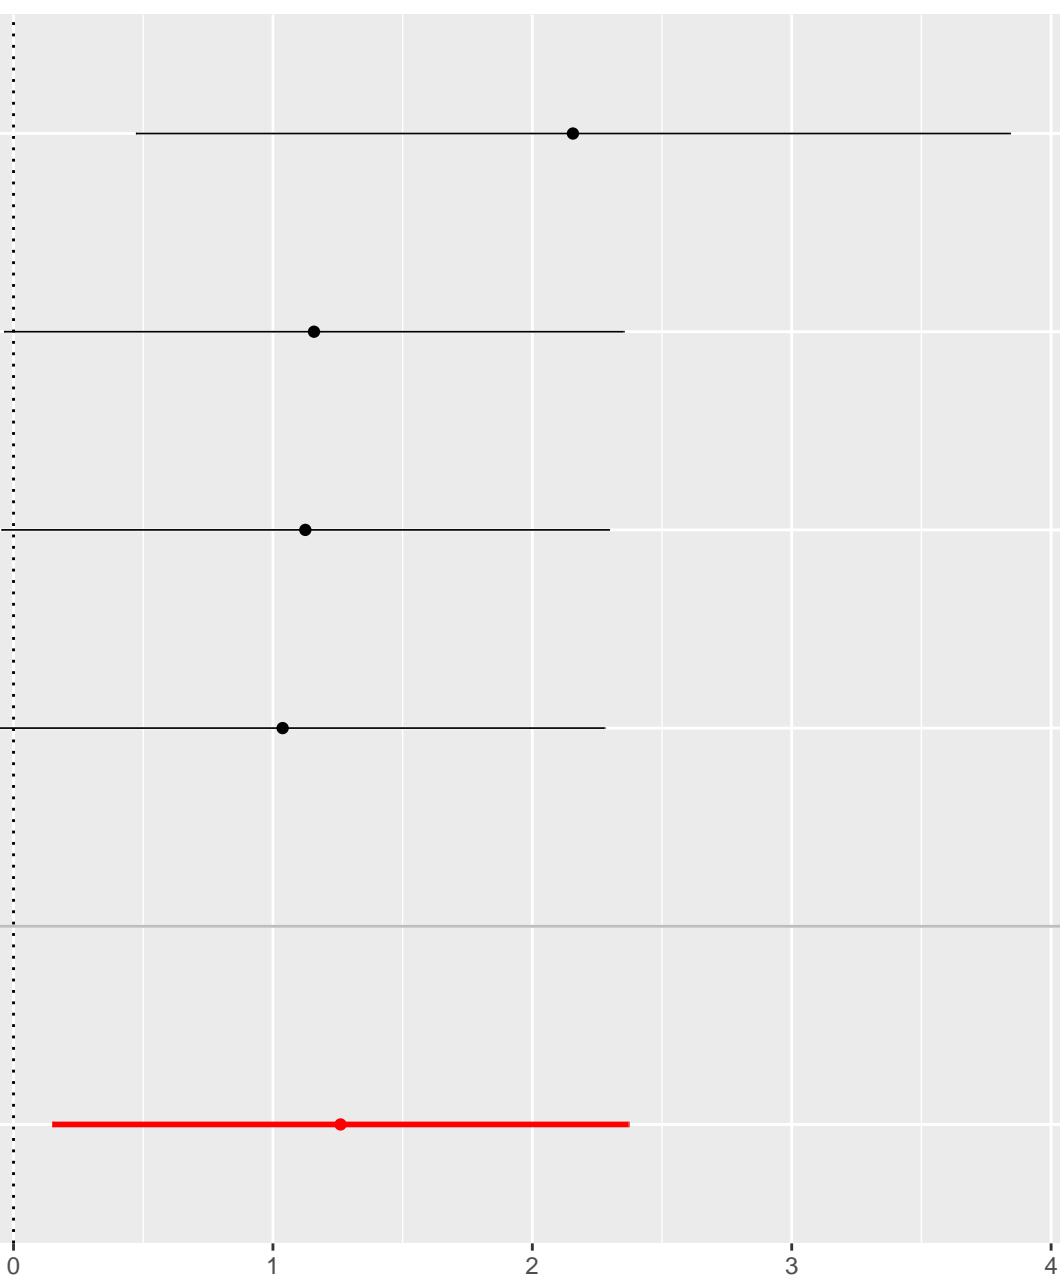

MR leave-one-out sensitivity analysis for 'M19324.metal.pos.txt.gz' on 'JUVEN\_ARTHR.gz'



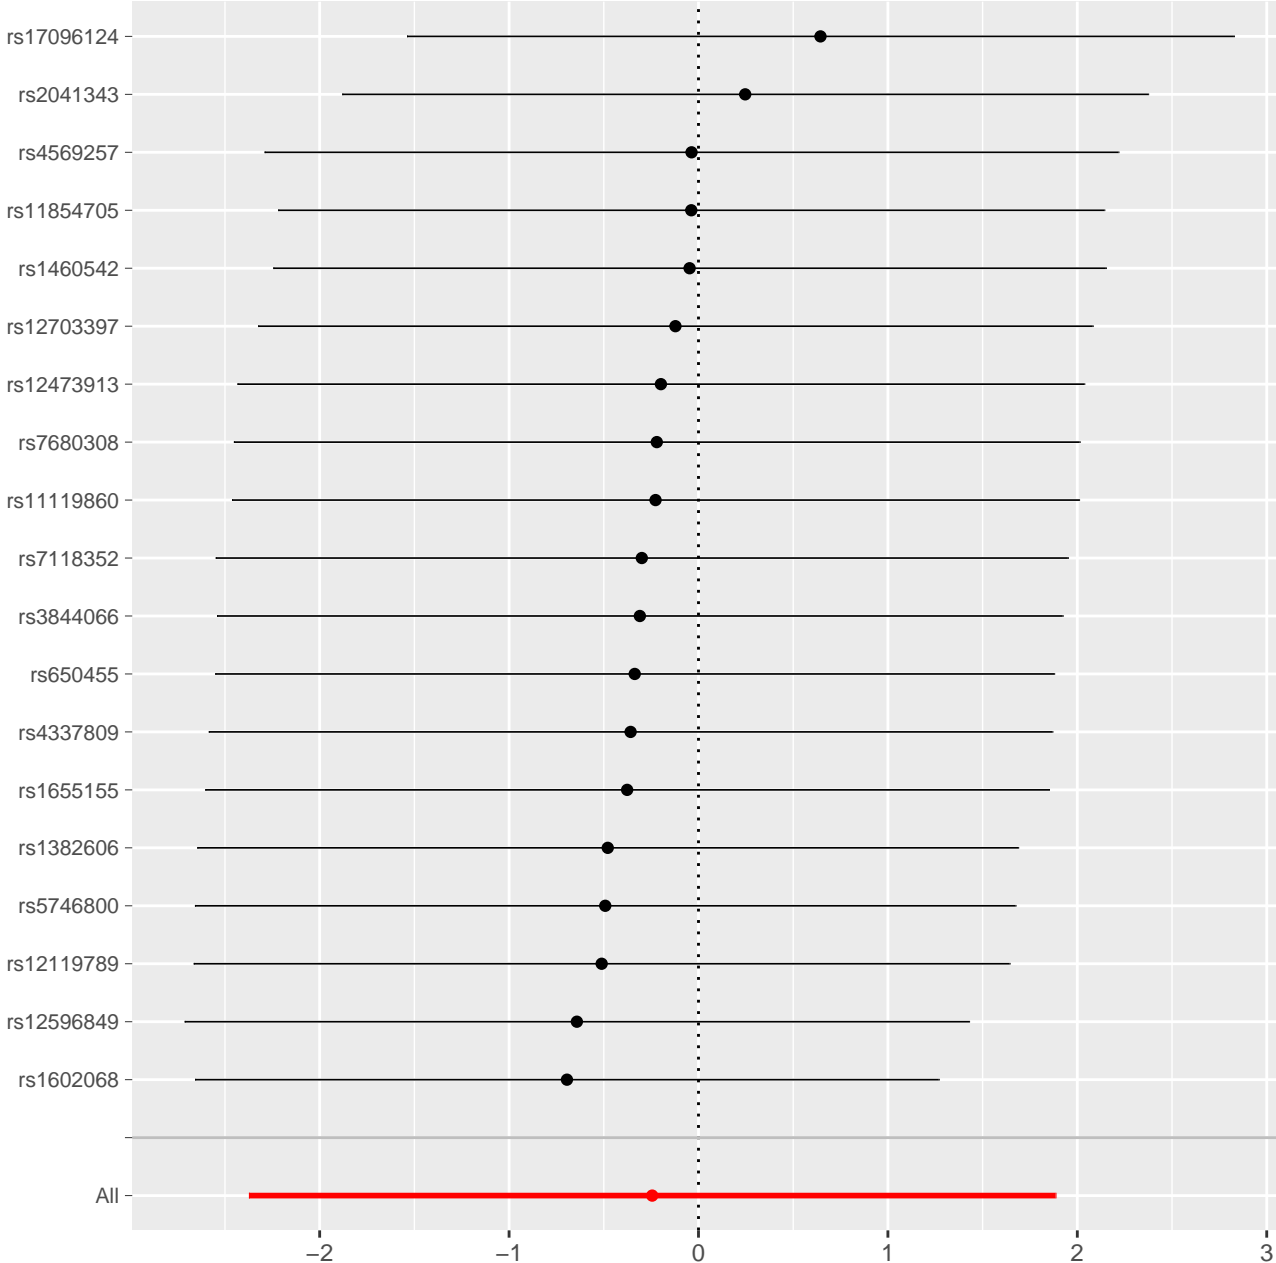

MR leave-one-out sensitivity analysis for 'M19362.metal.pos.txt.gz' on 'JUVEN\_ARTHR.gz'

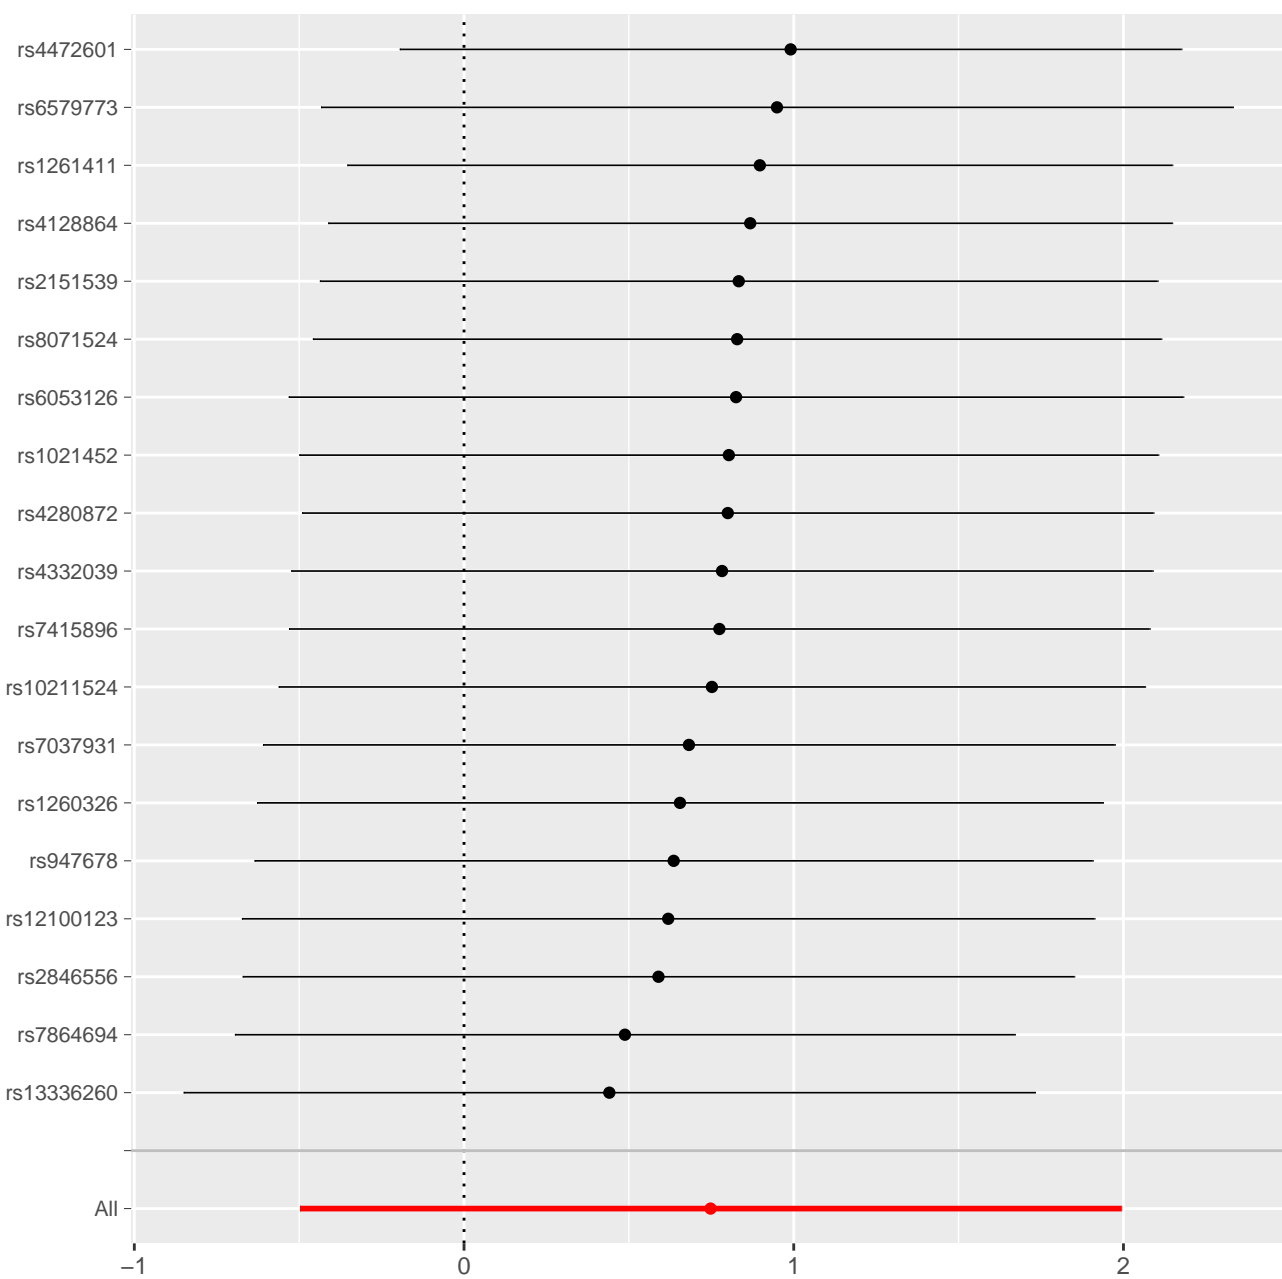

MR leave-one-out sensitivity analysis for 'M19364.metal.pos.txt.gz' on 'JUVEN\_ARTHR.gz'

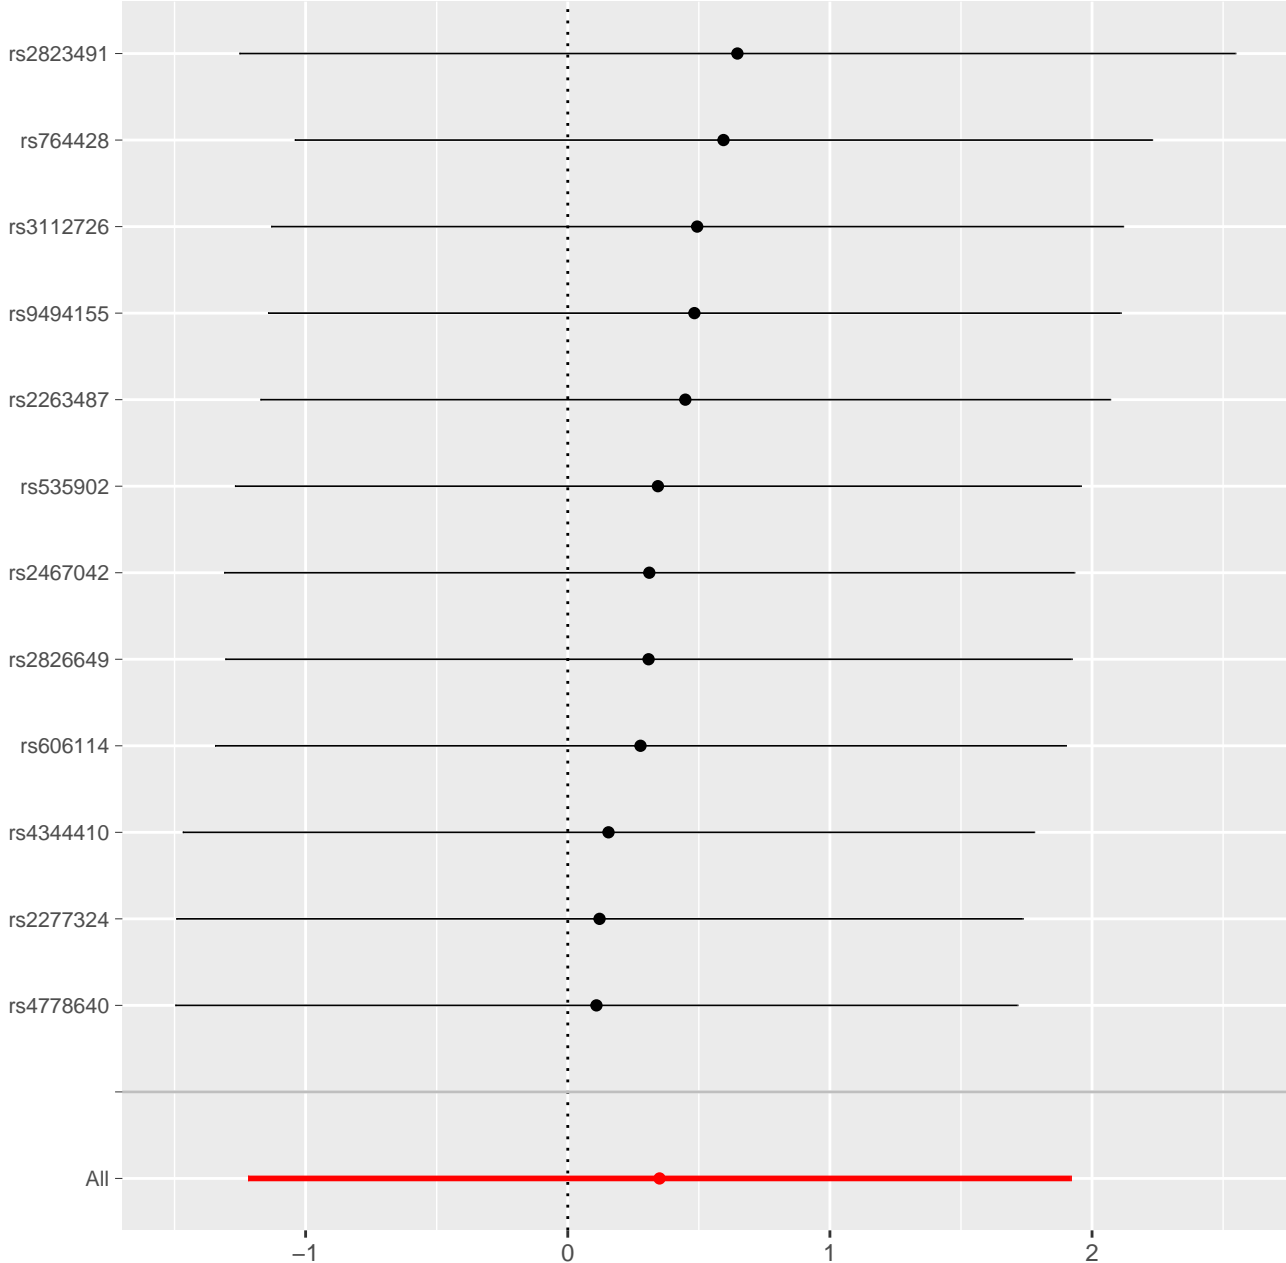

MR leave-one-out sensitivity analysis for 'M19368.metal.pos.txt.gz' on 'JUVEN\_ARTHR.gz'

rs4998531

rs789736

rs2100777

rs4884317

rs17739309

rs12375763

All

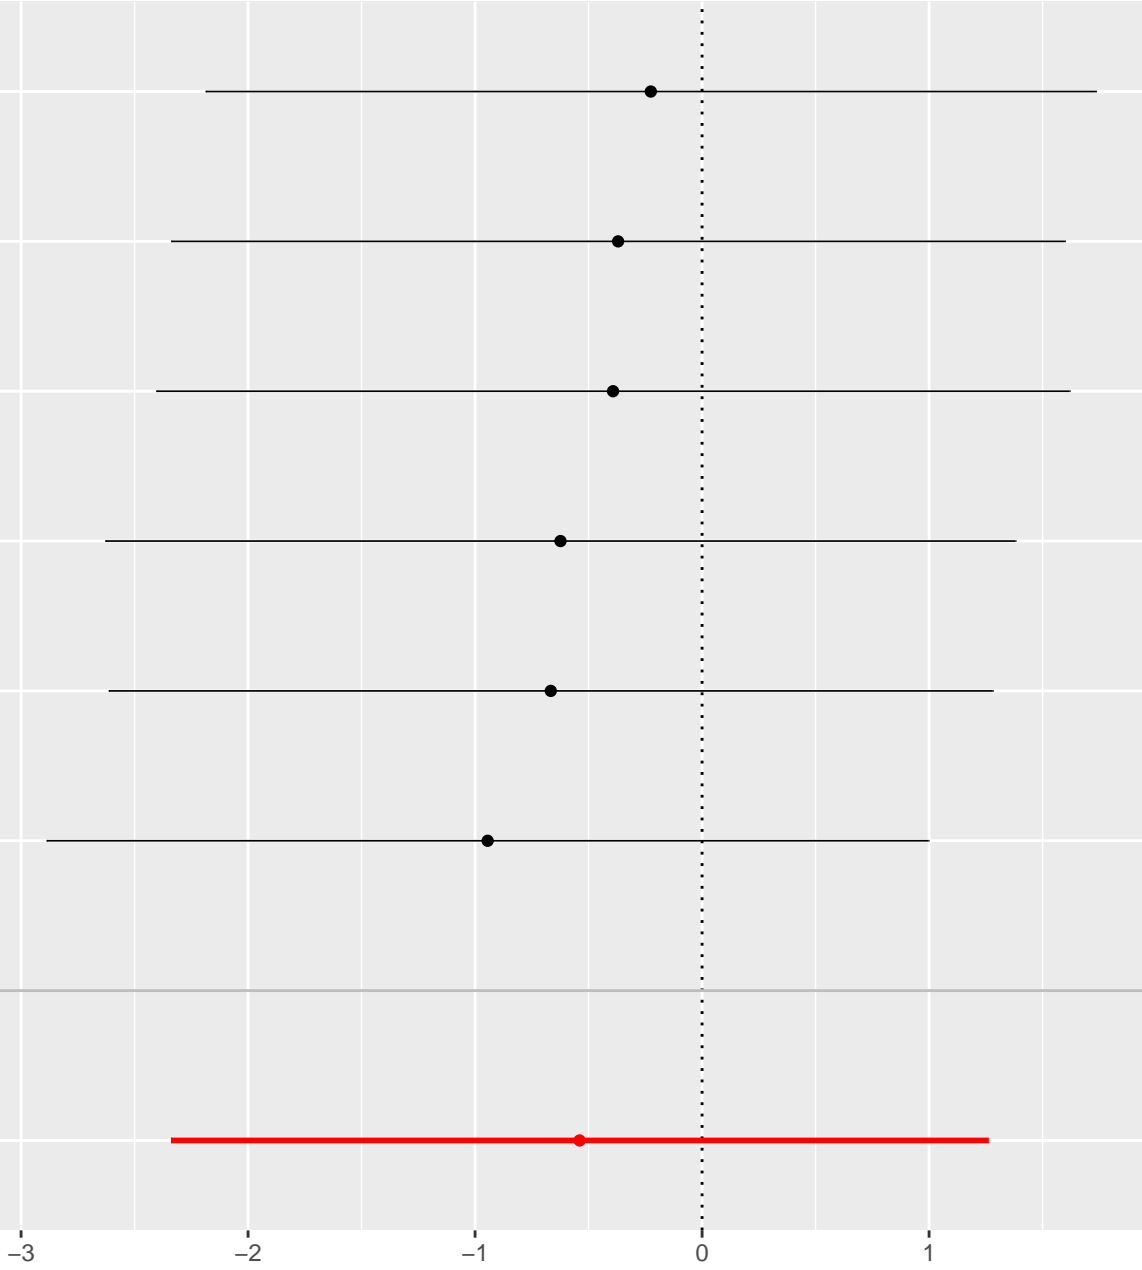

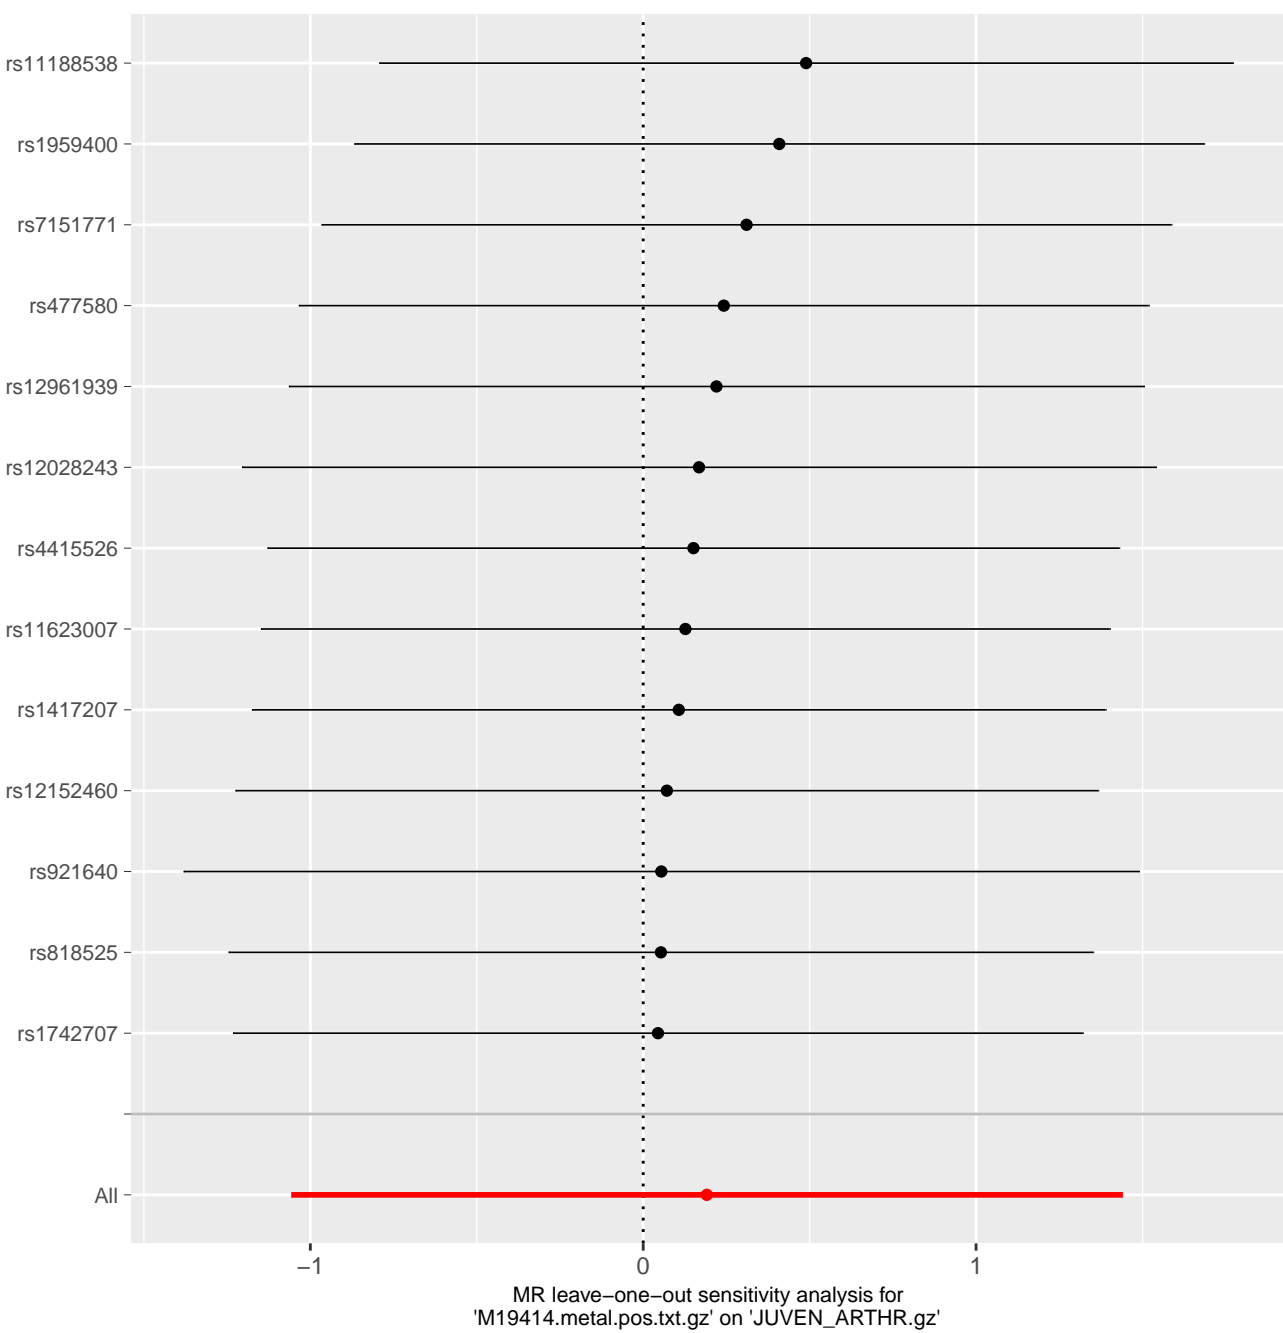

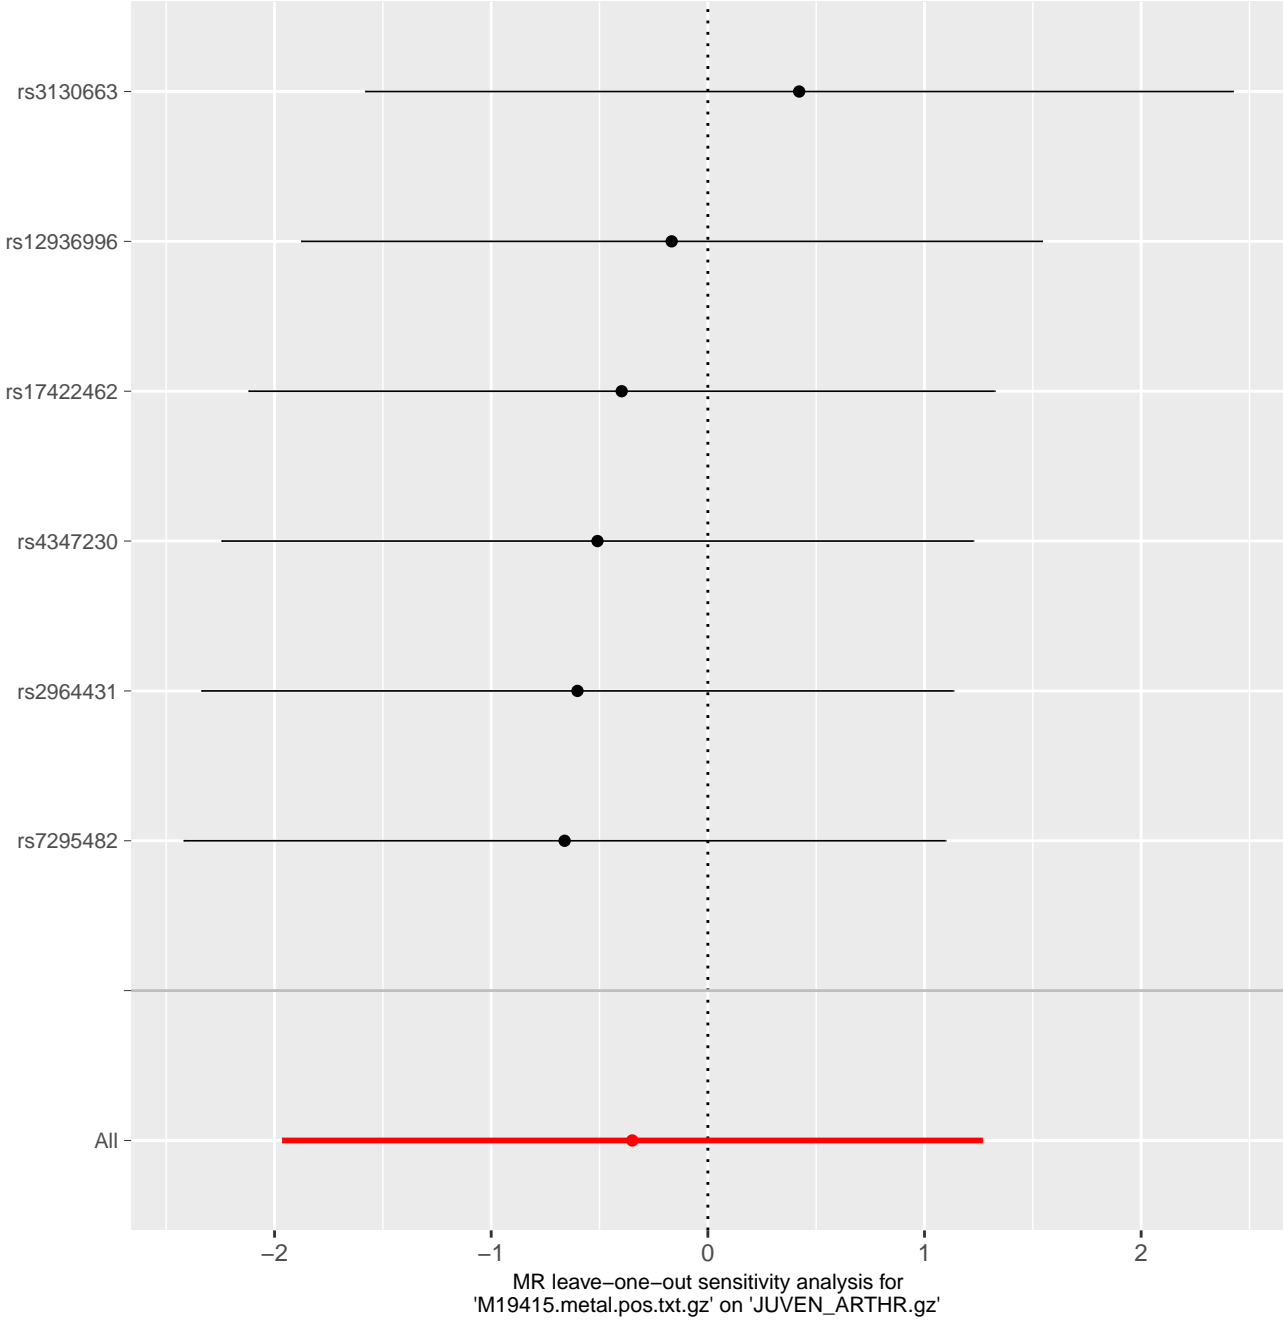

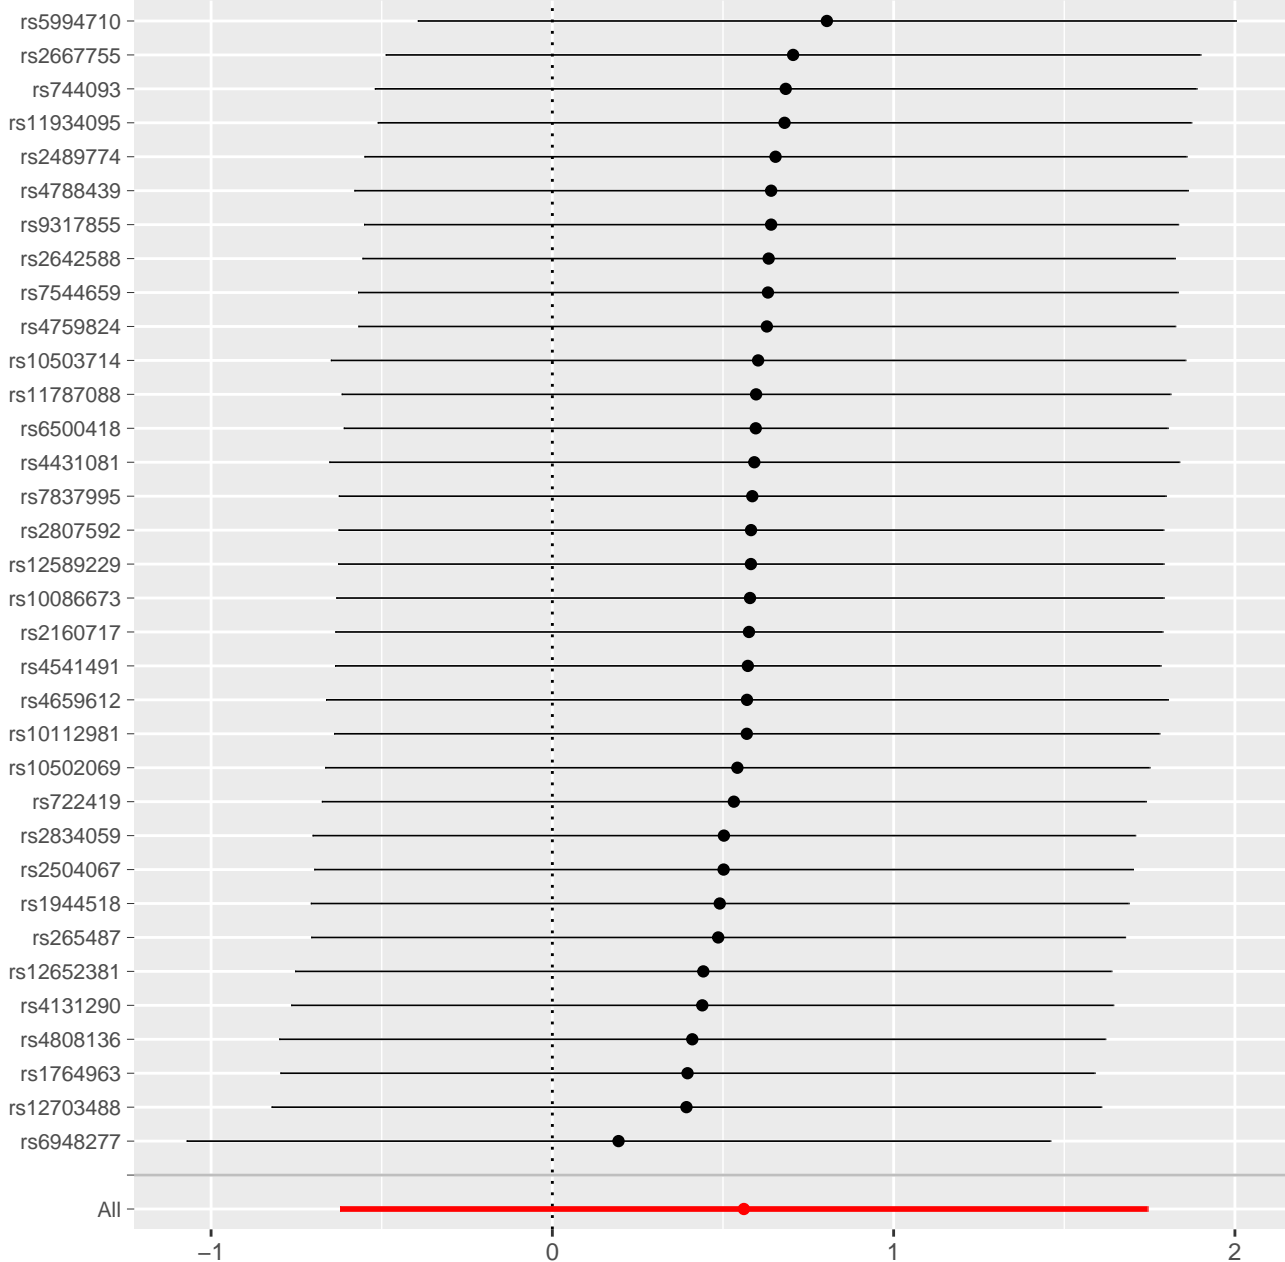

MR leave-one-out sensitivity analysis for 'M19934.metal.pos.txt.gz' on 'JUVEN\_ARTHR.gz'

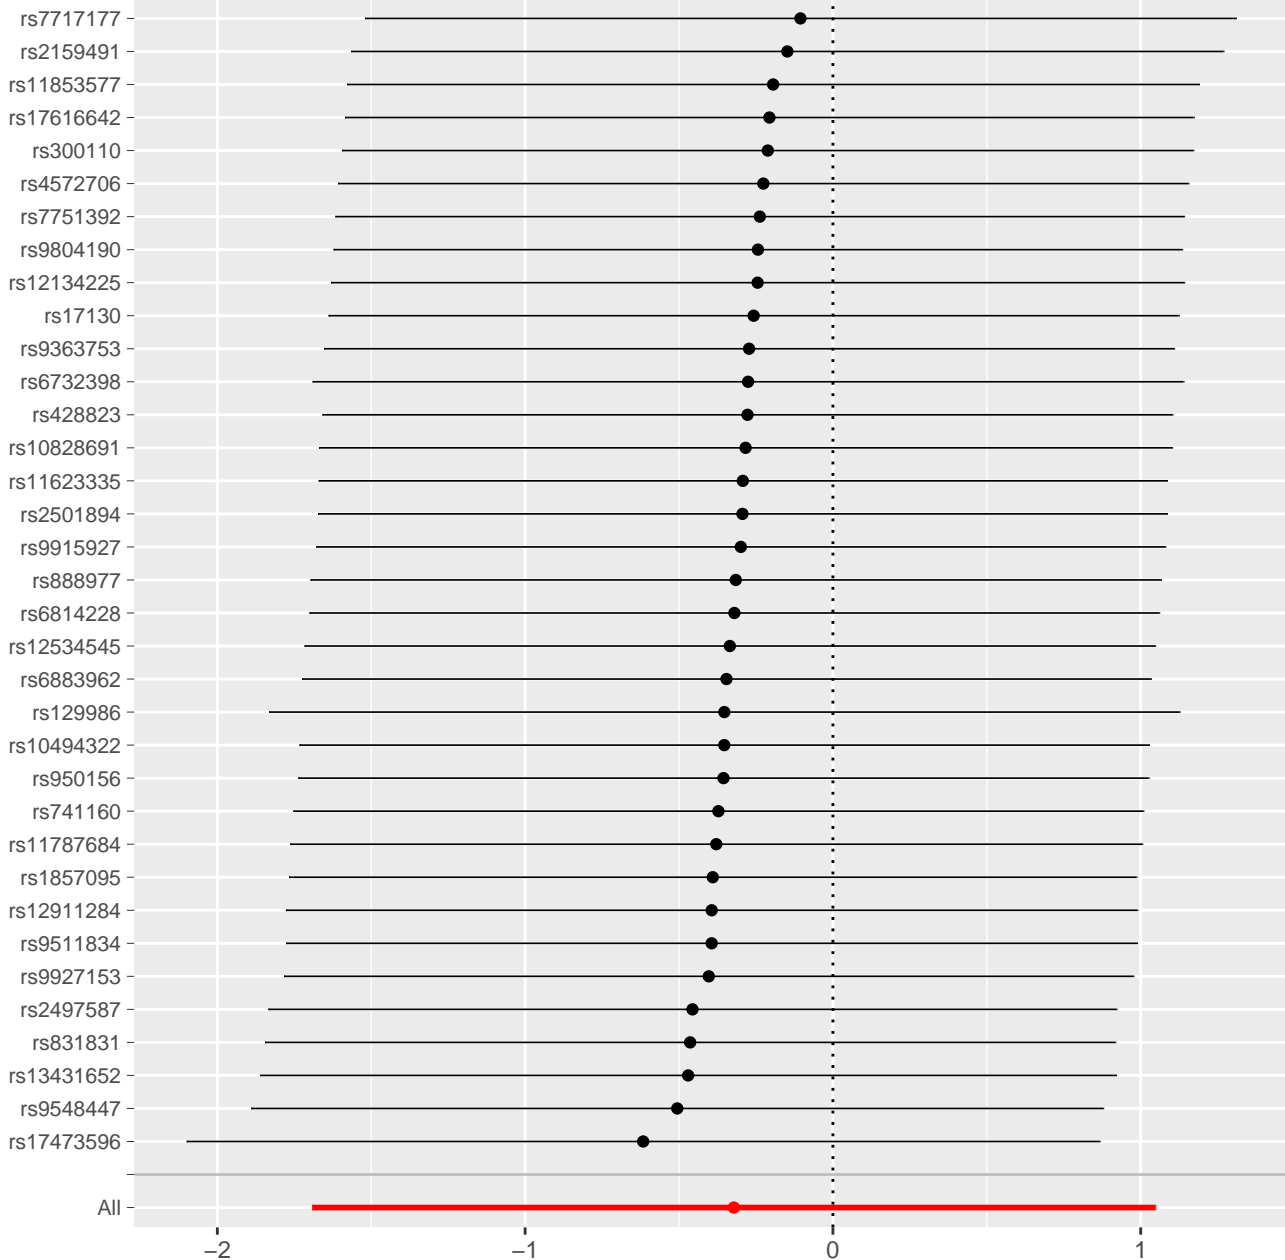

MR leave-one-out sensitivity analysis for 'M20489.metal.pos.txt.gz' on 'JUVEN\_ARTHR.gz'



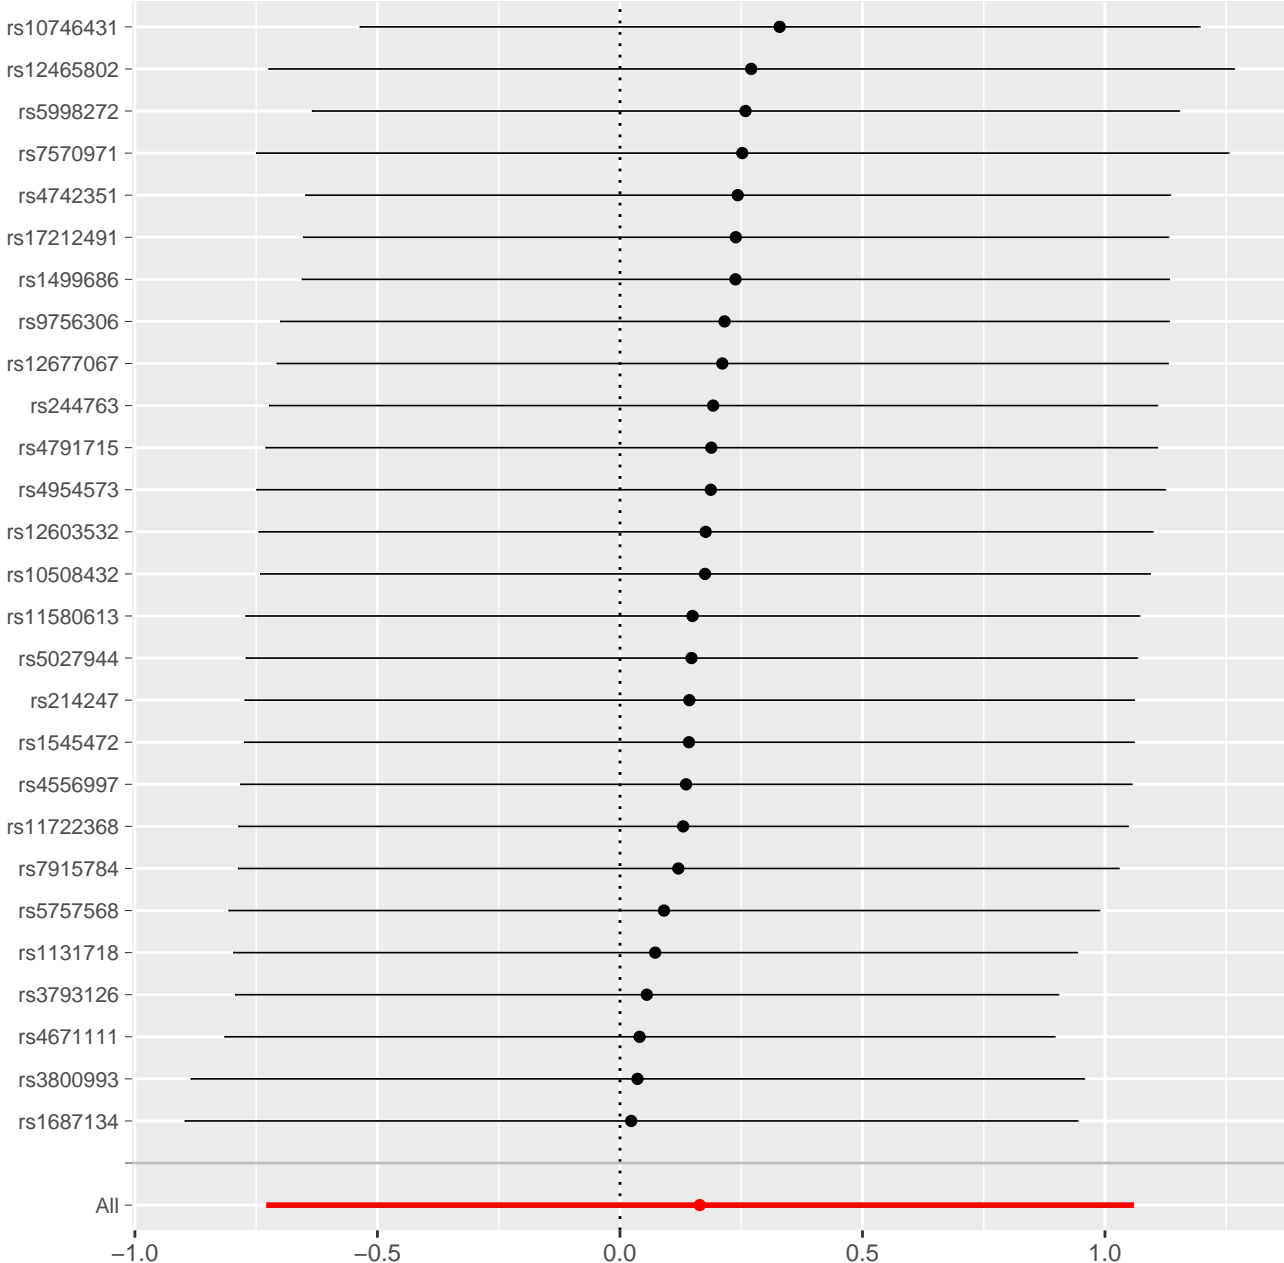

MR leave-one-out sensitivity analysis for 'M20675.metal.pos.txt.gz' on 'JUVEN\_ARTHR.gz'

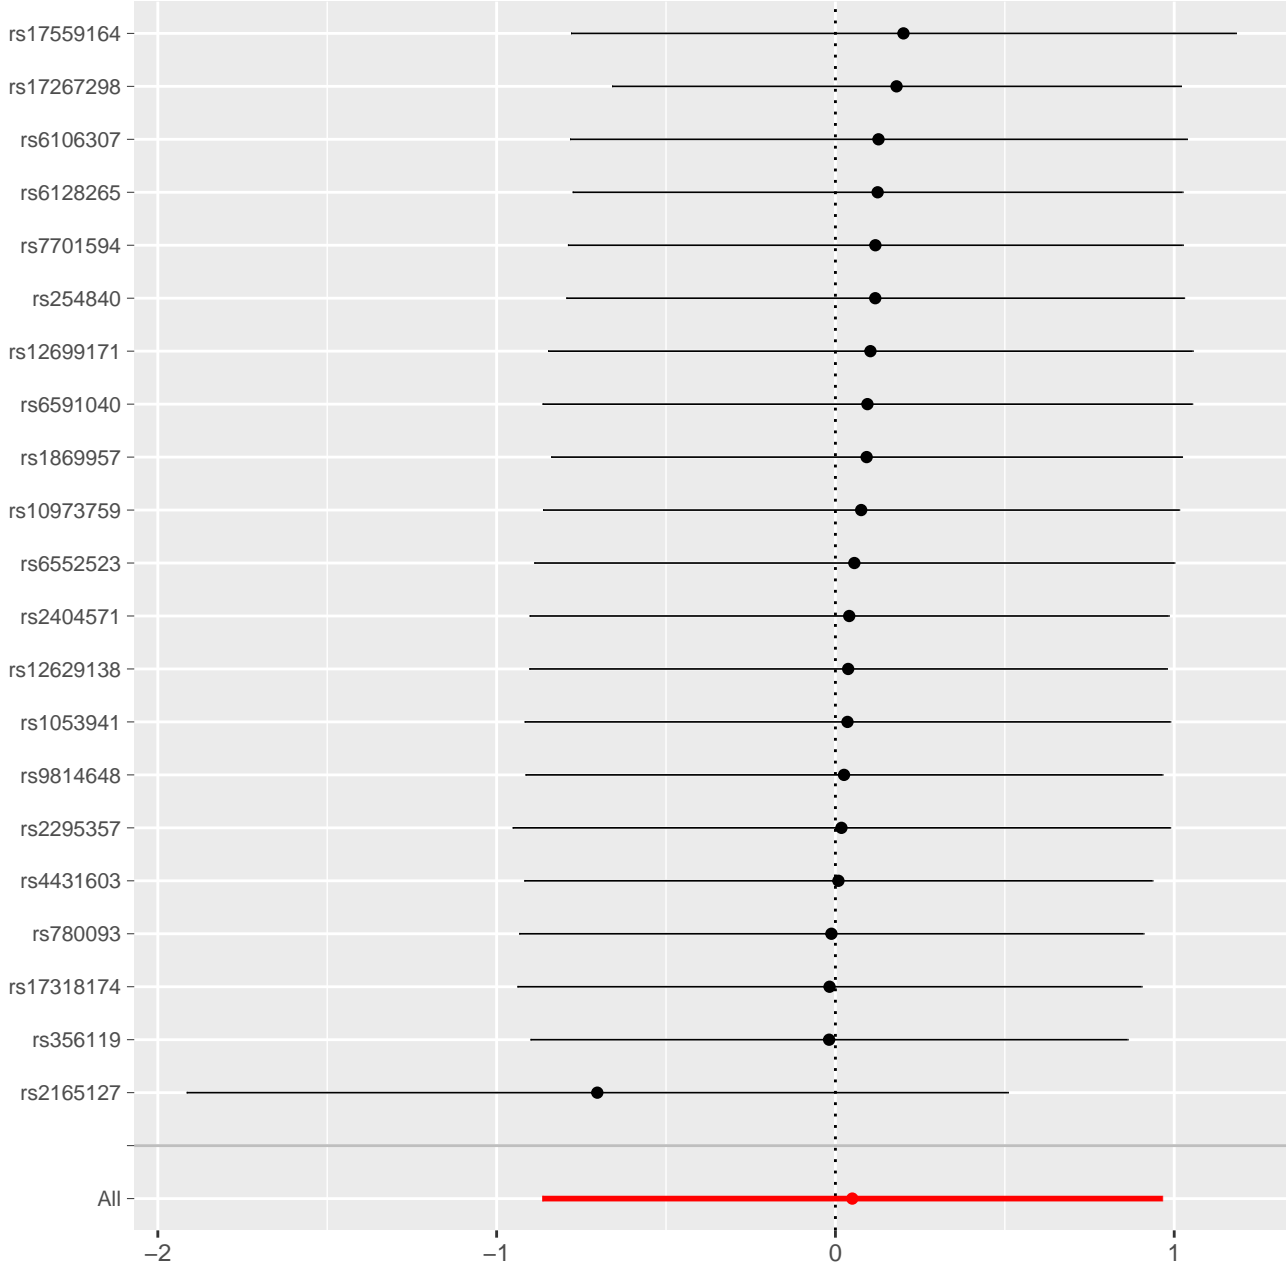

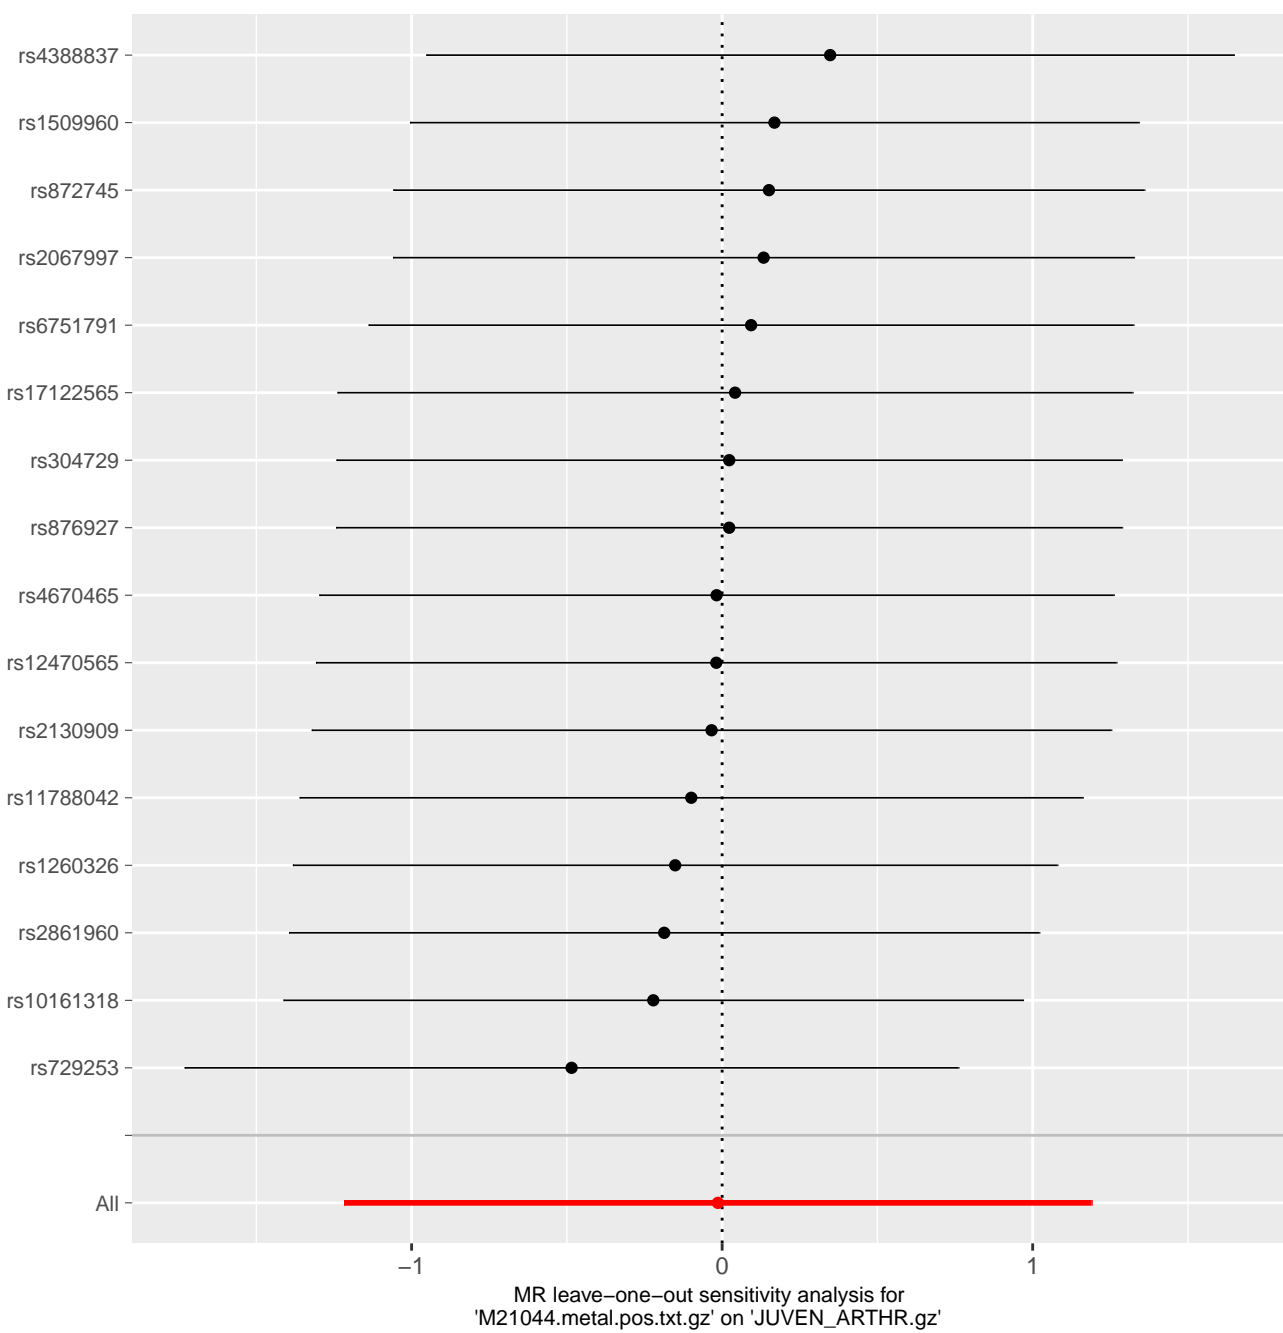

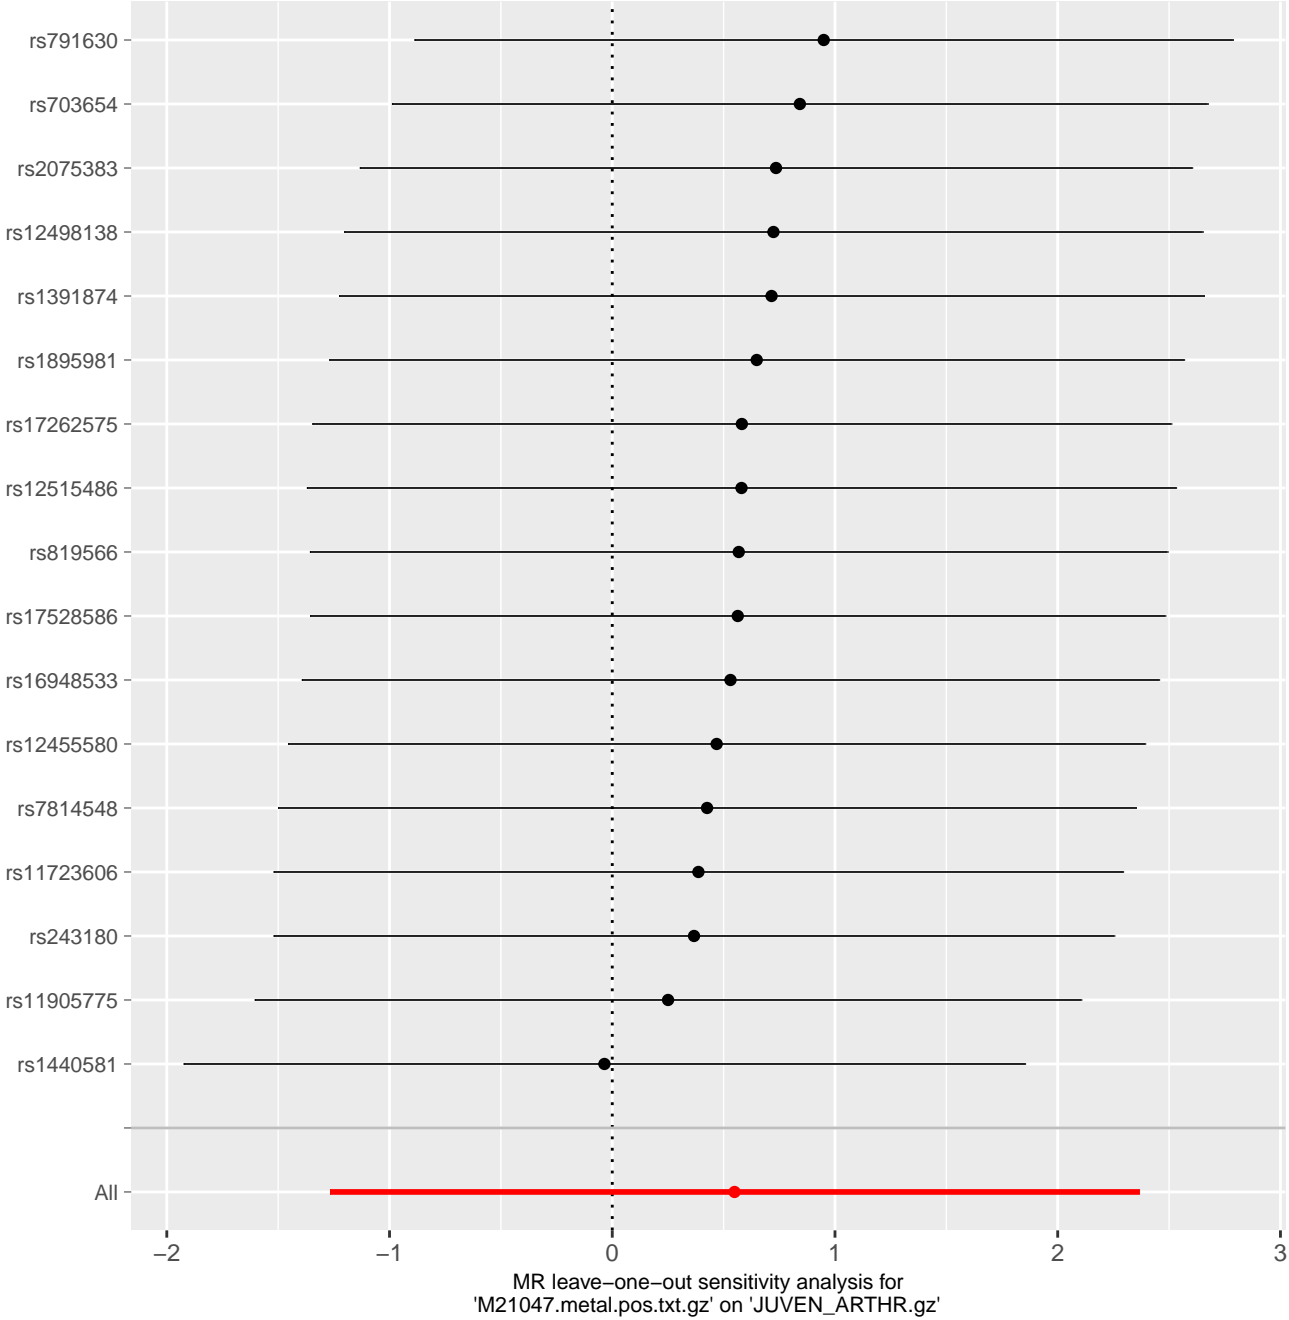

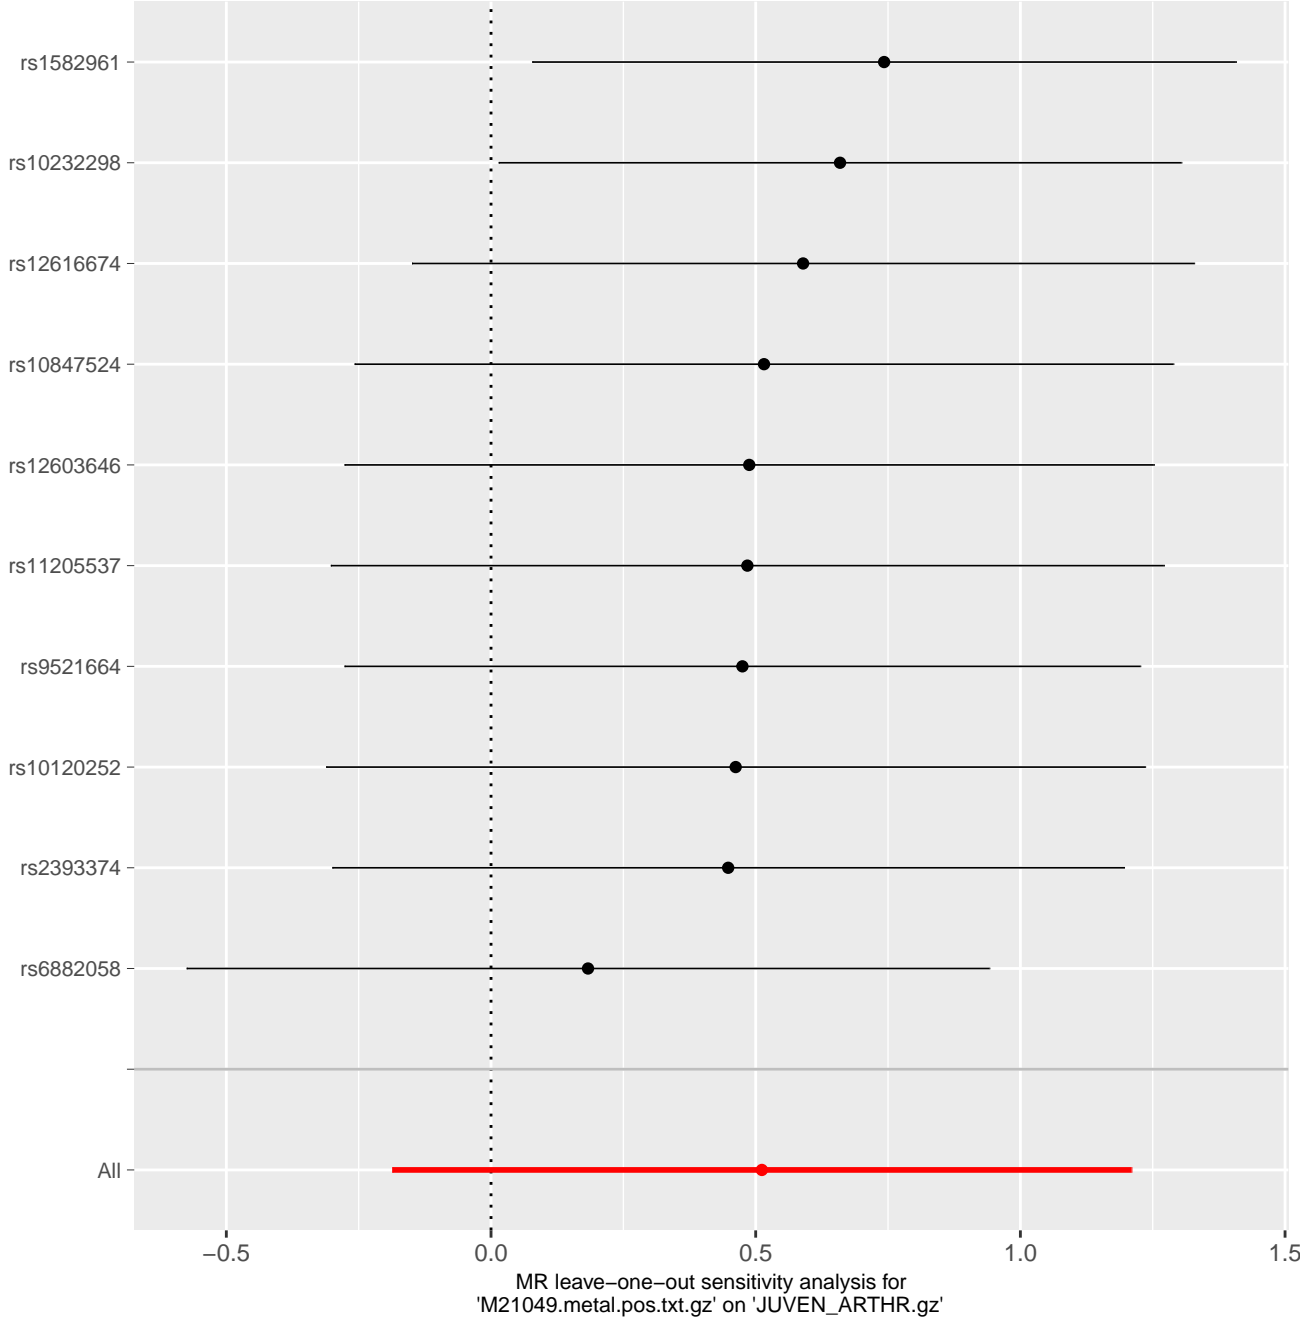

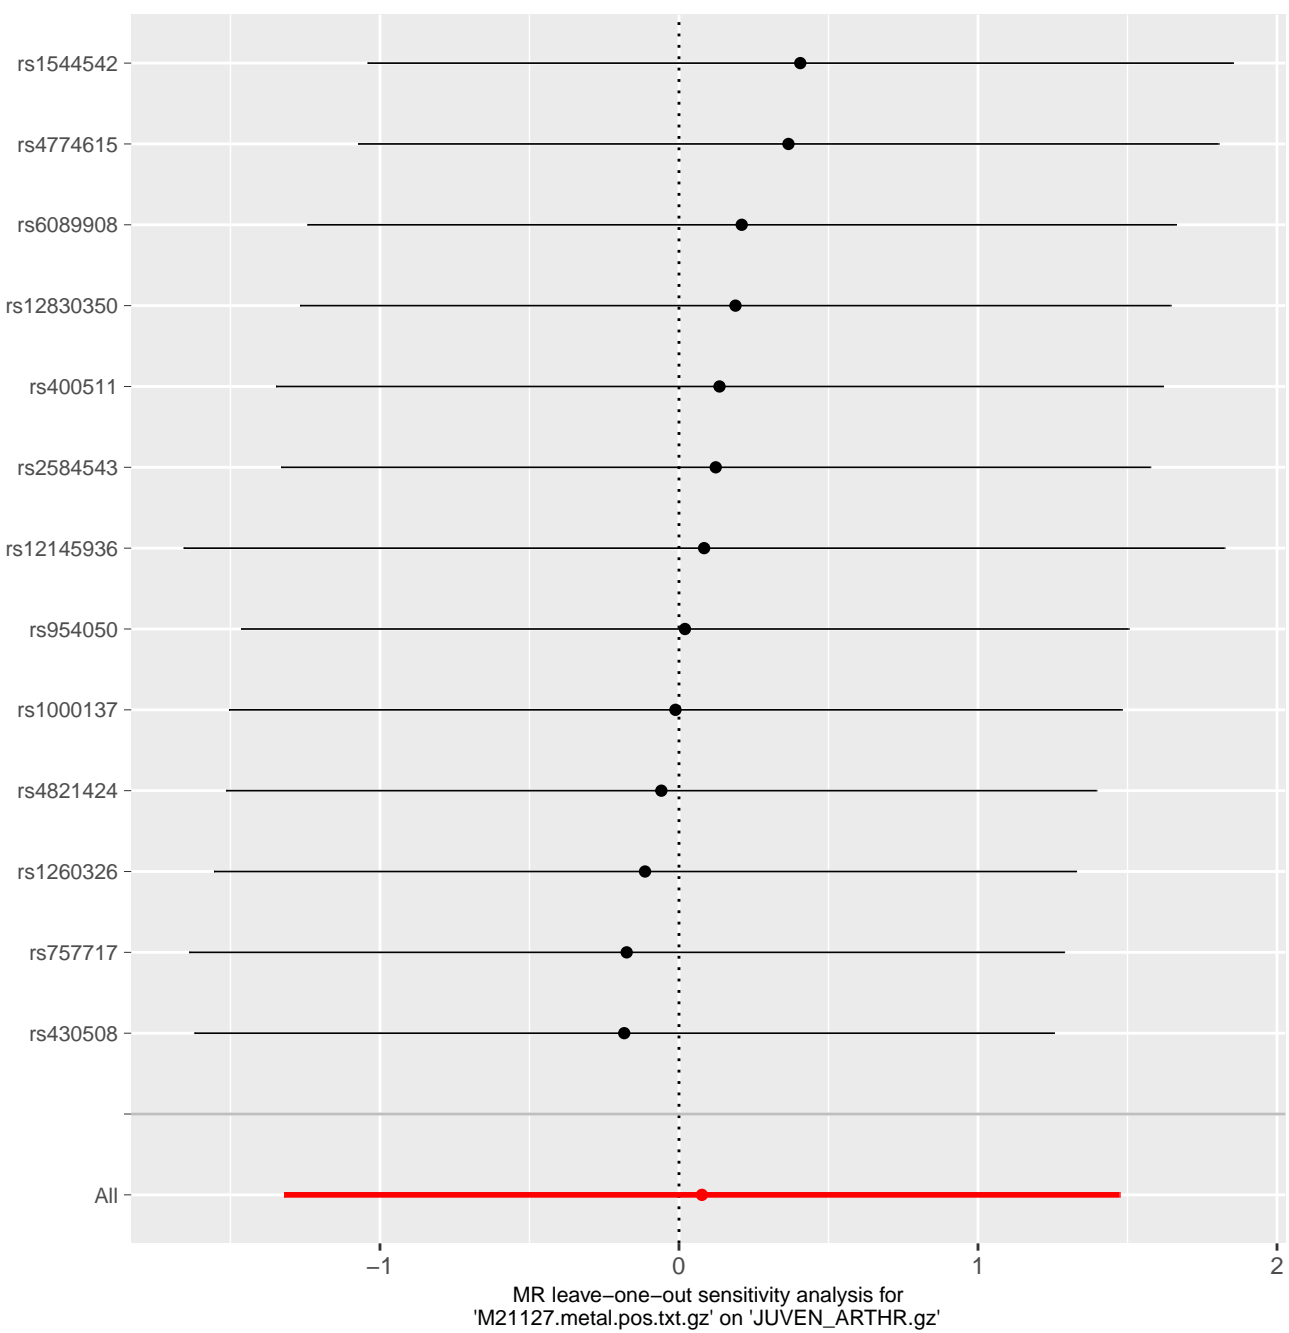

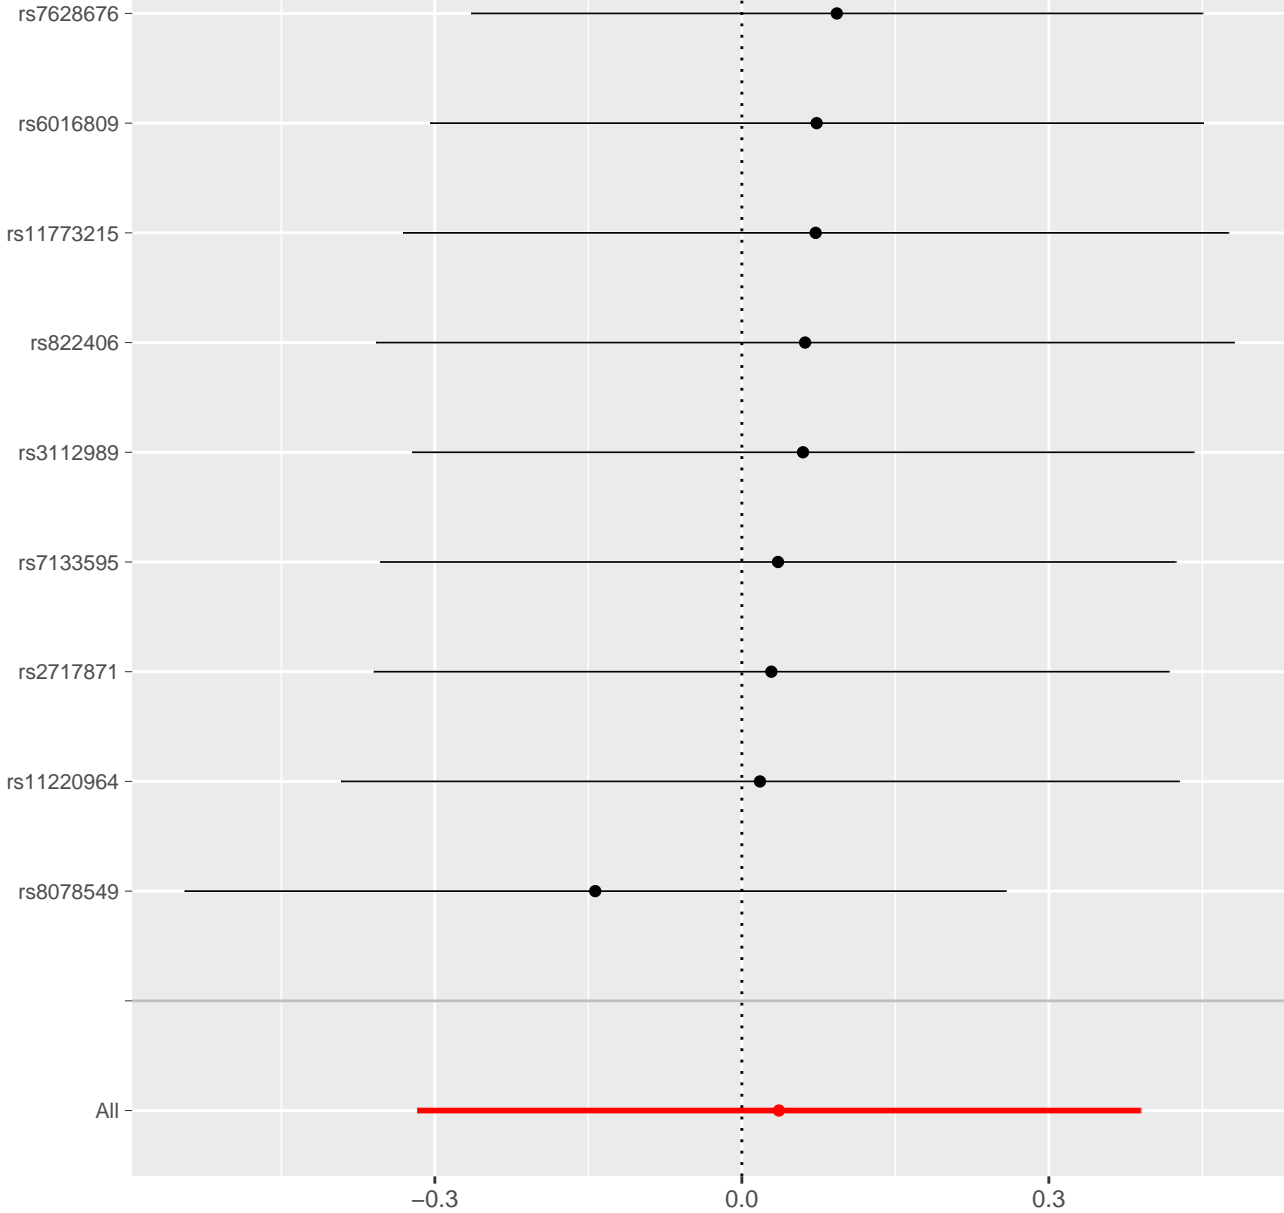

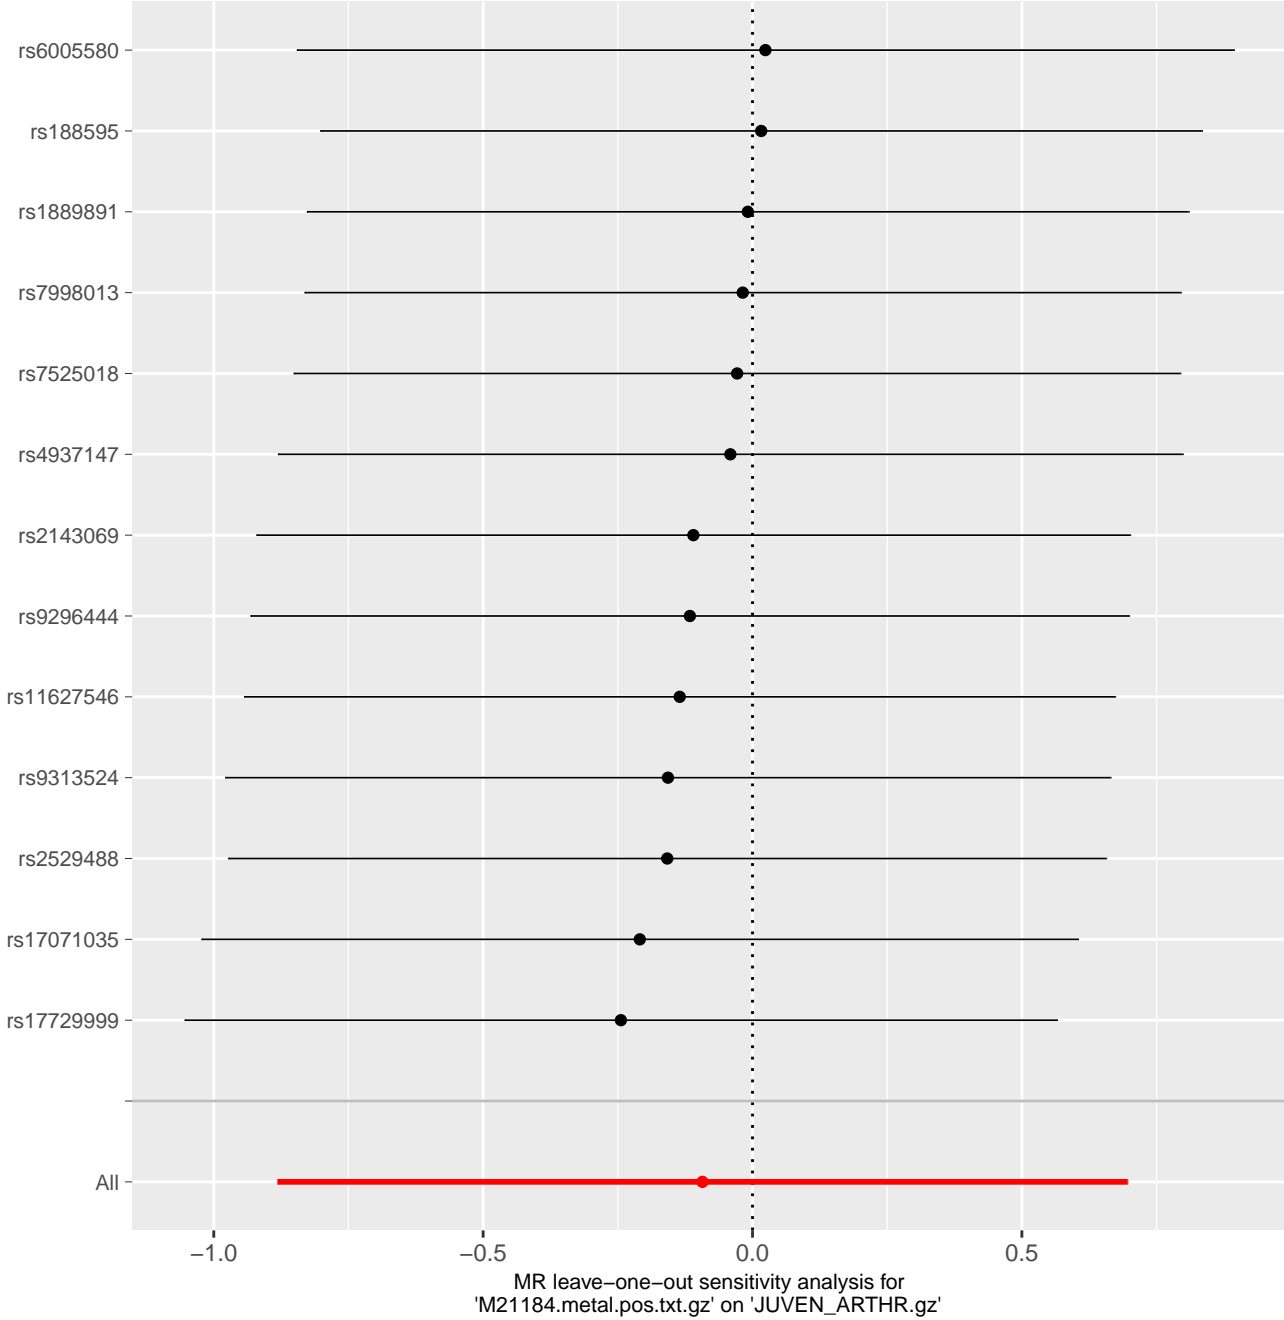



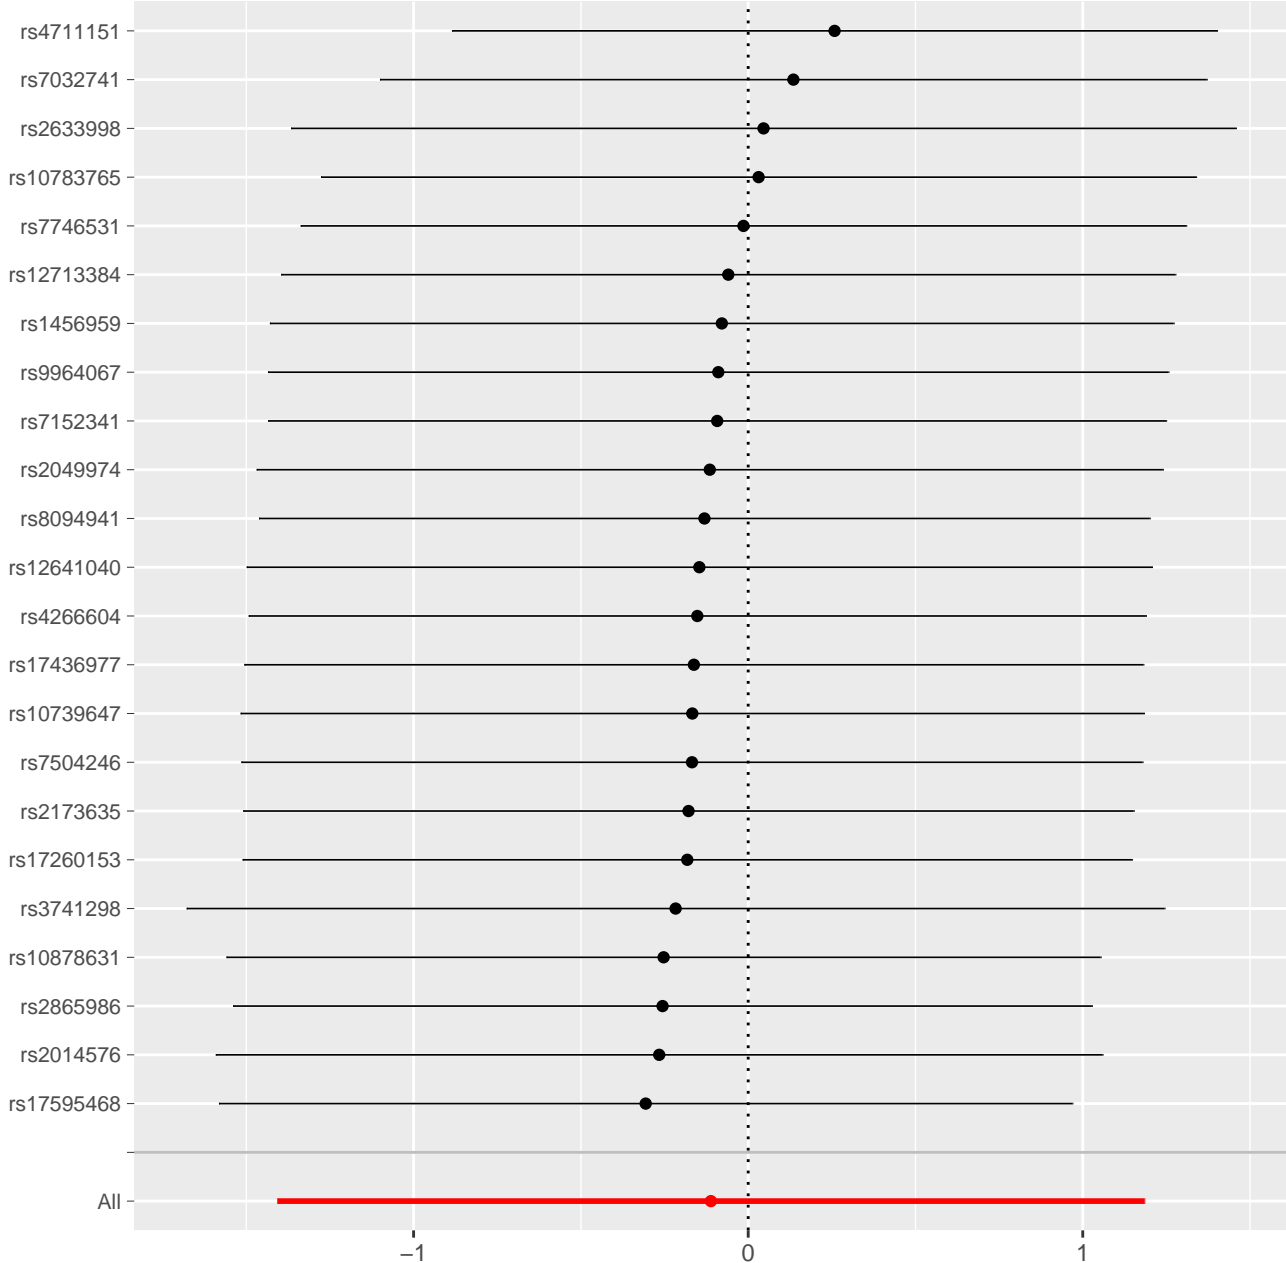

MR leave-one-out sensitivity analysis for 'M21188.metal.pos.txt.gz' on 'JUVEN\_ARTHR.gz'

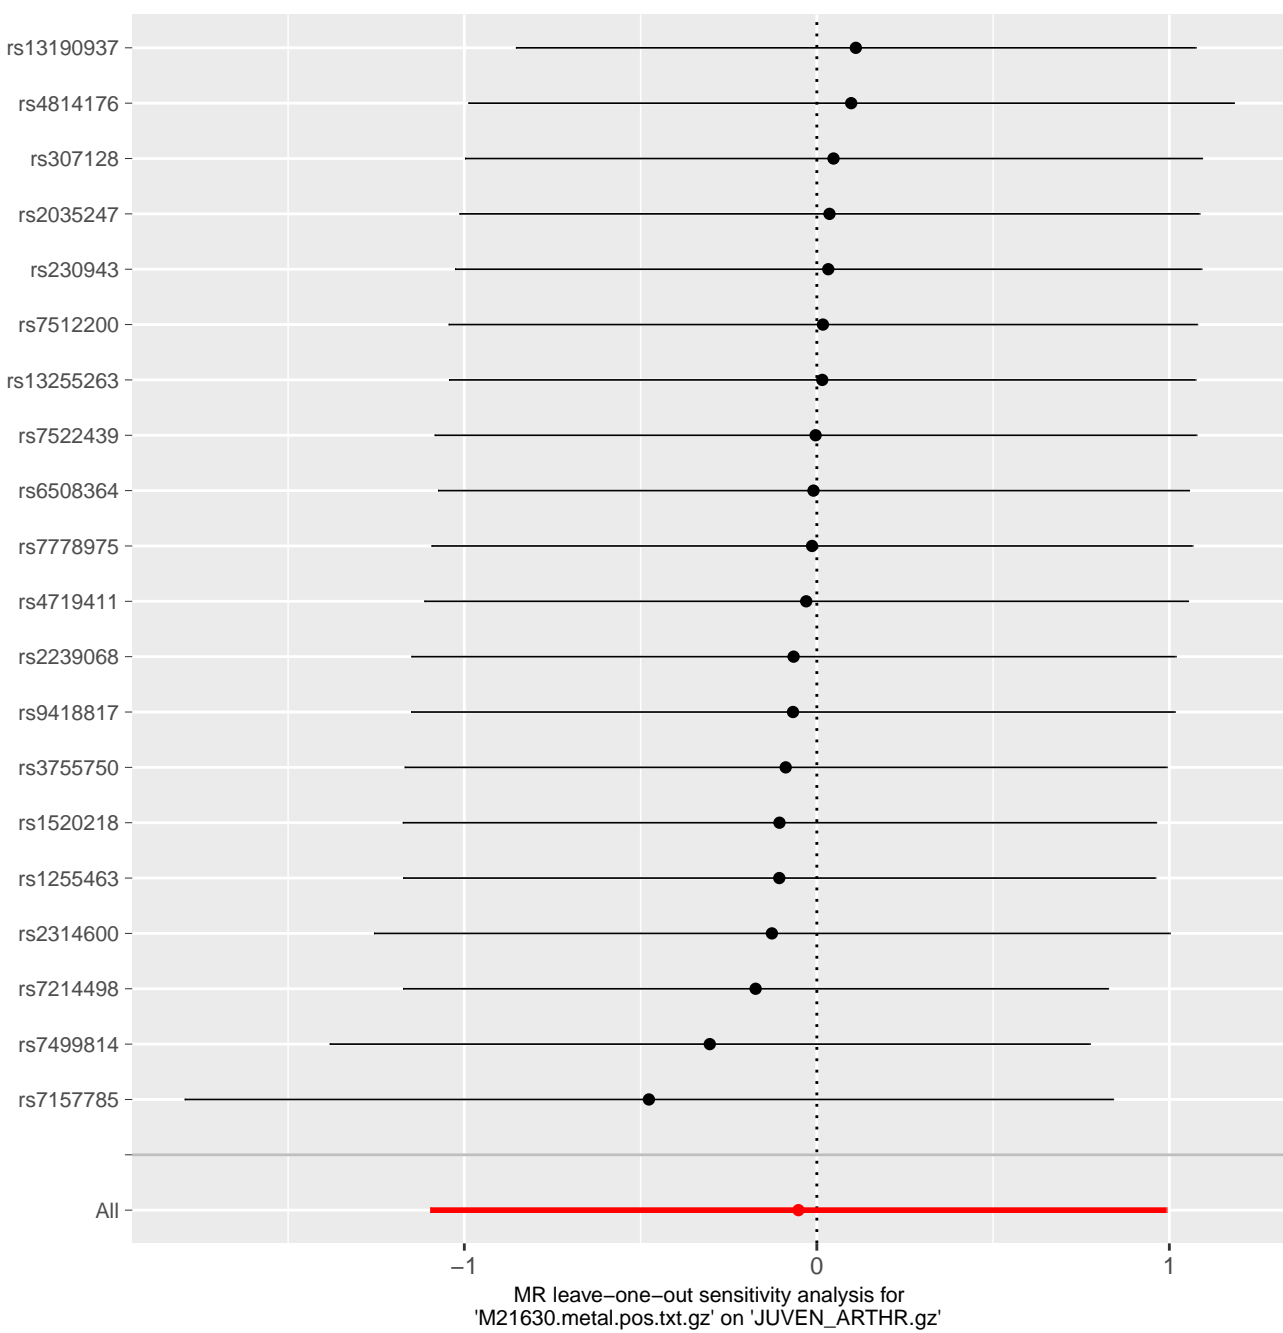

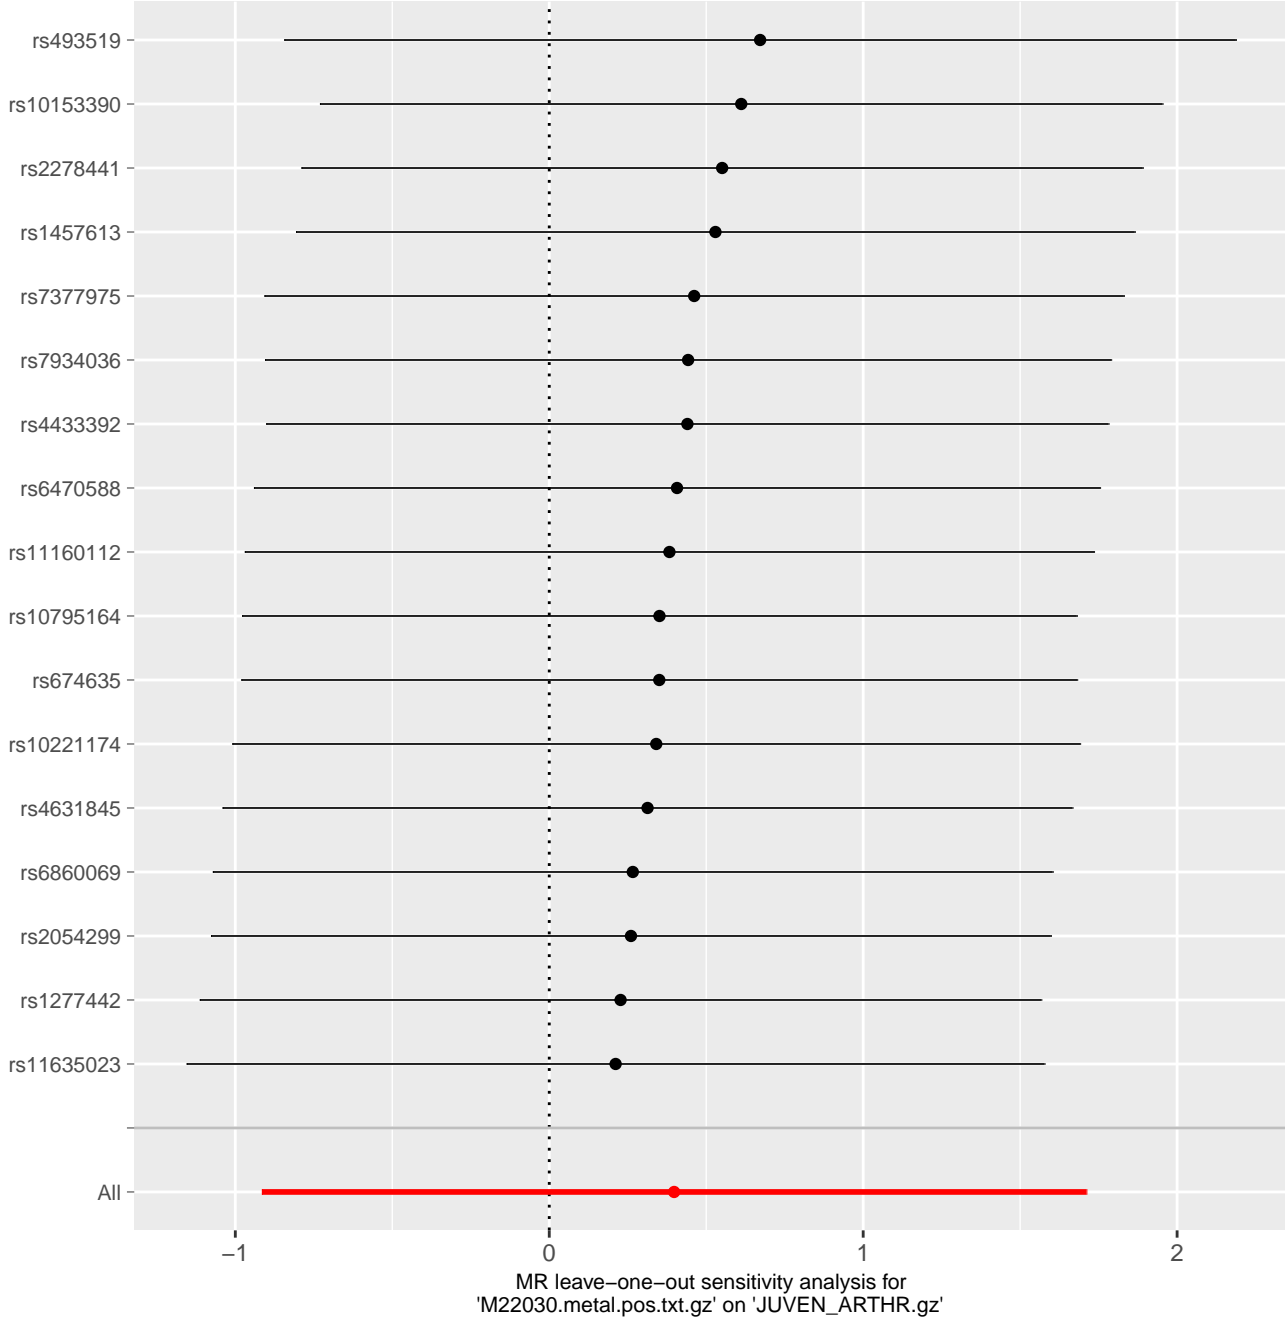

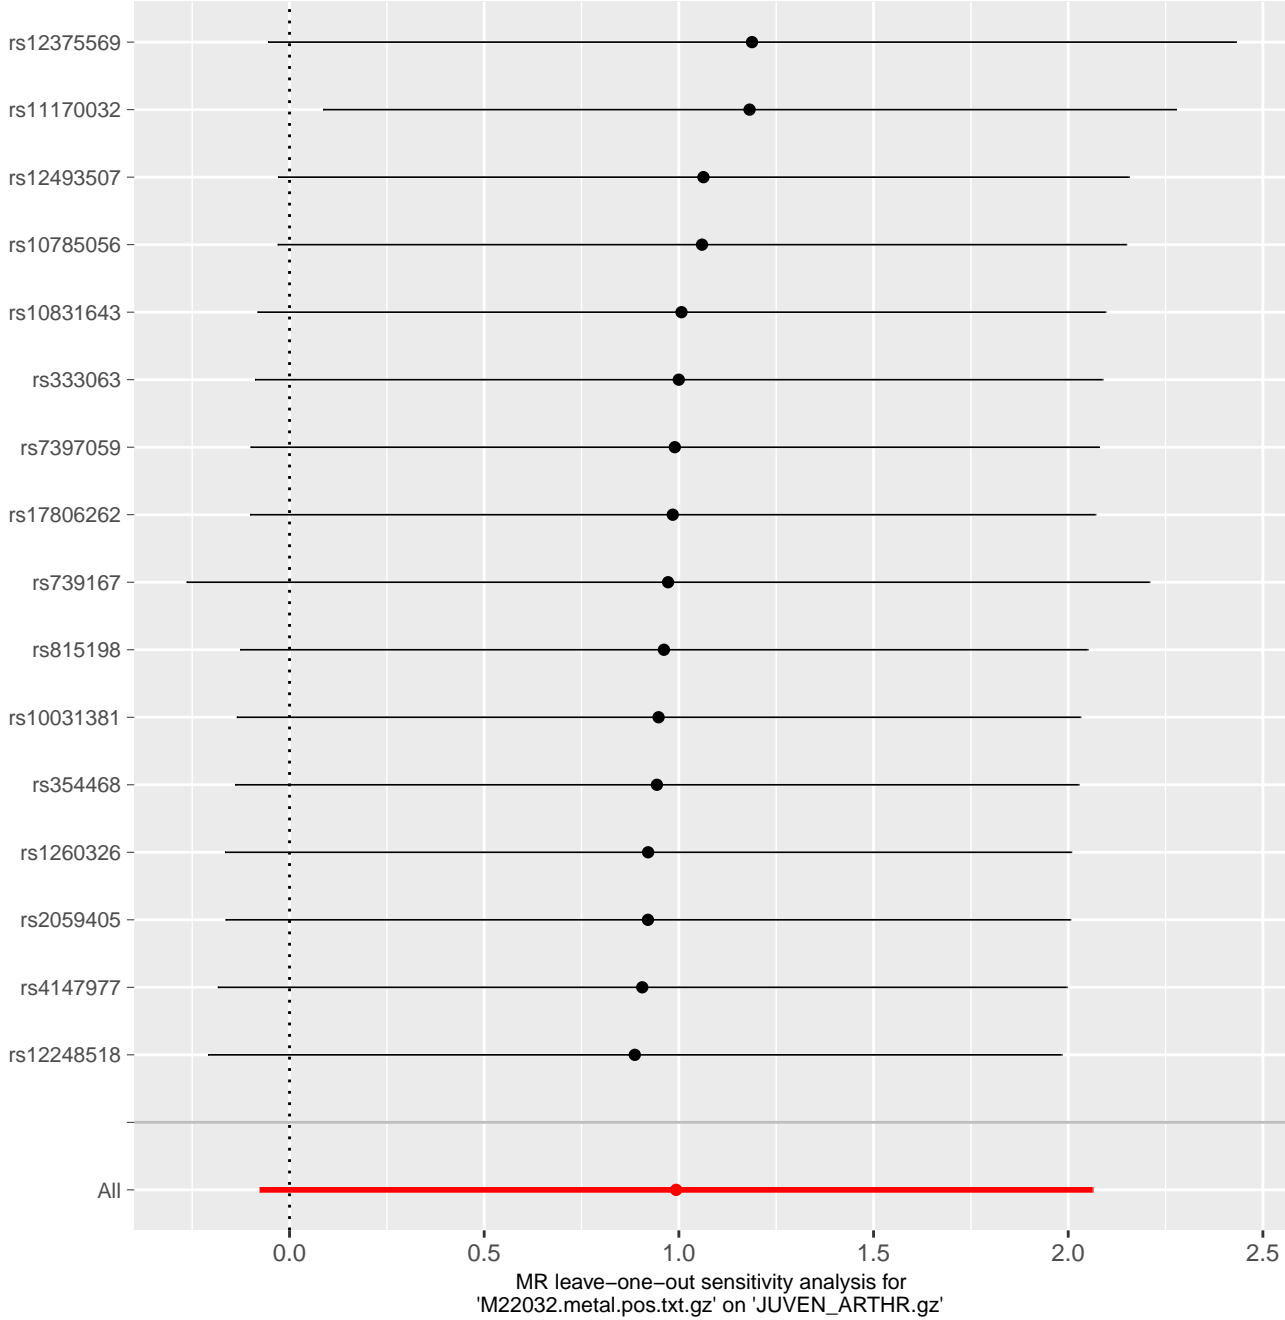

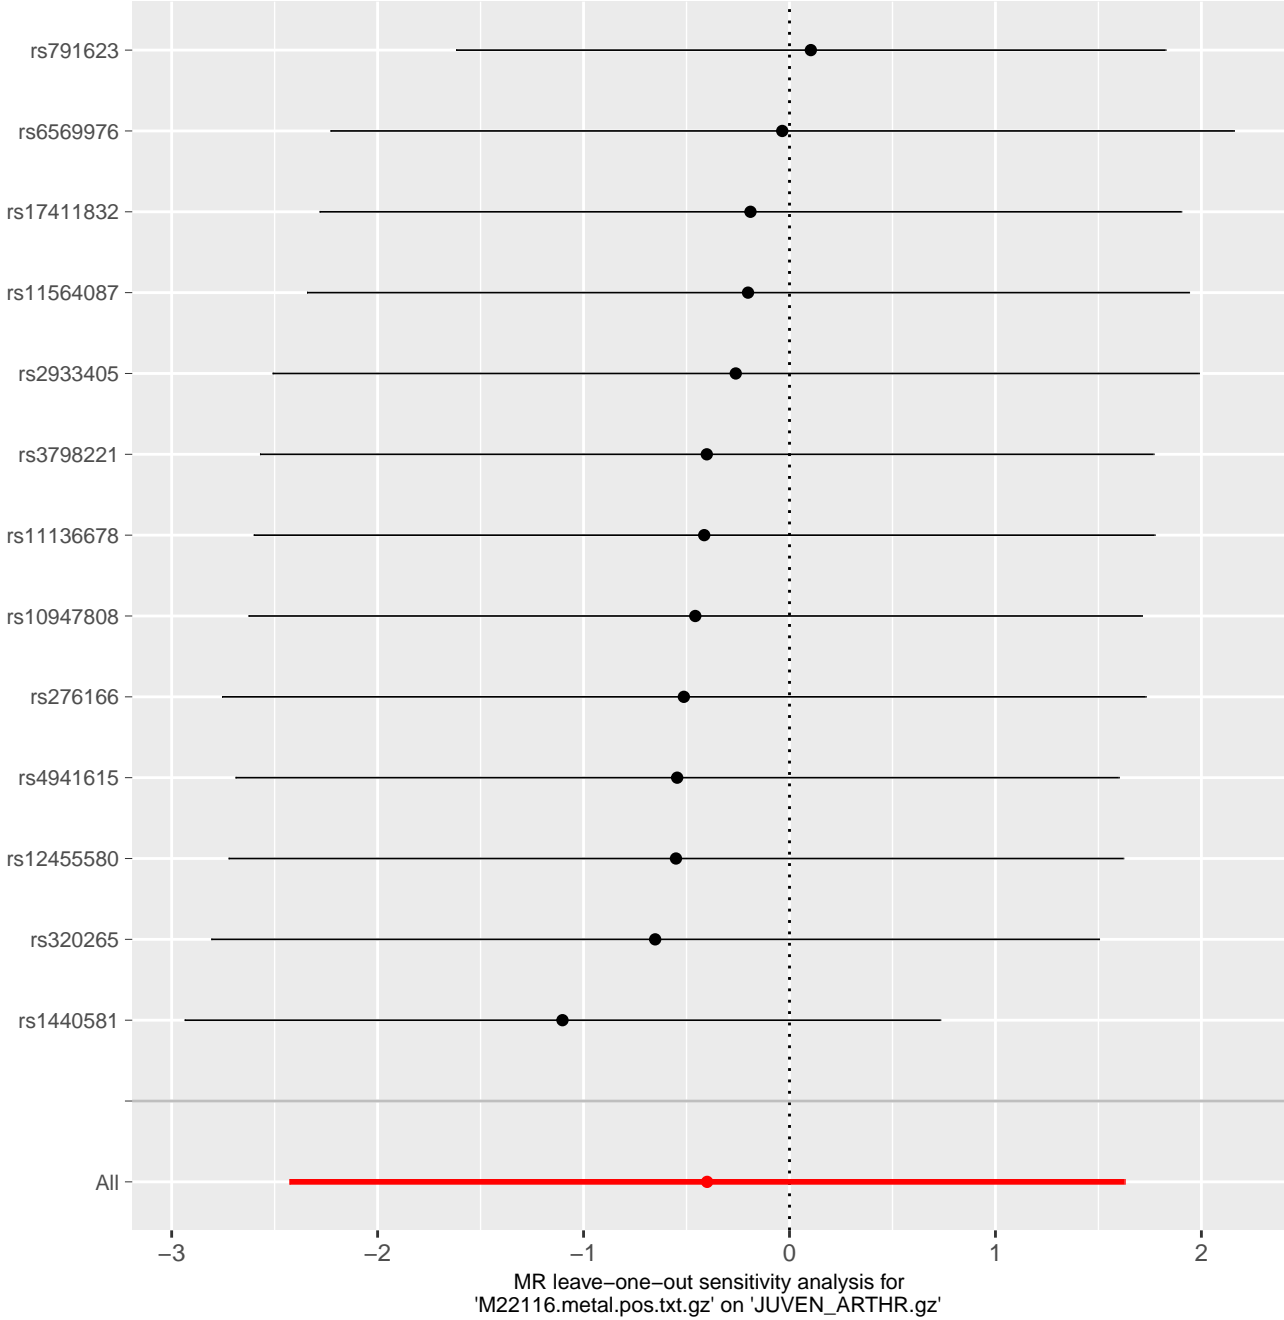

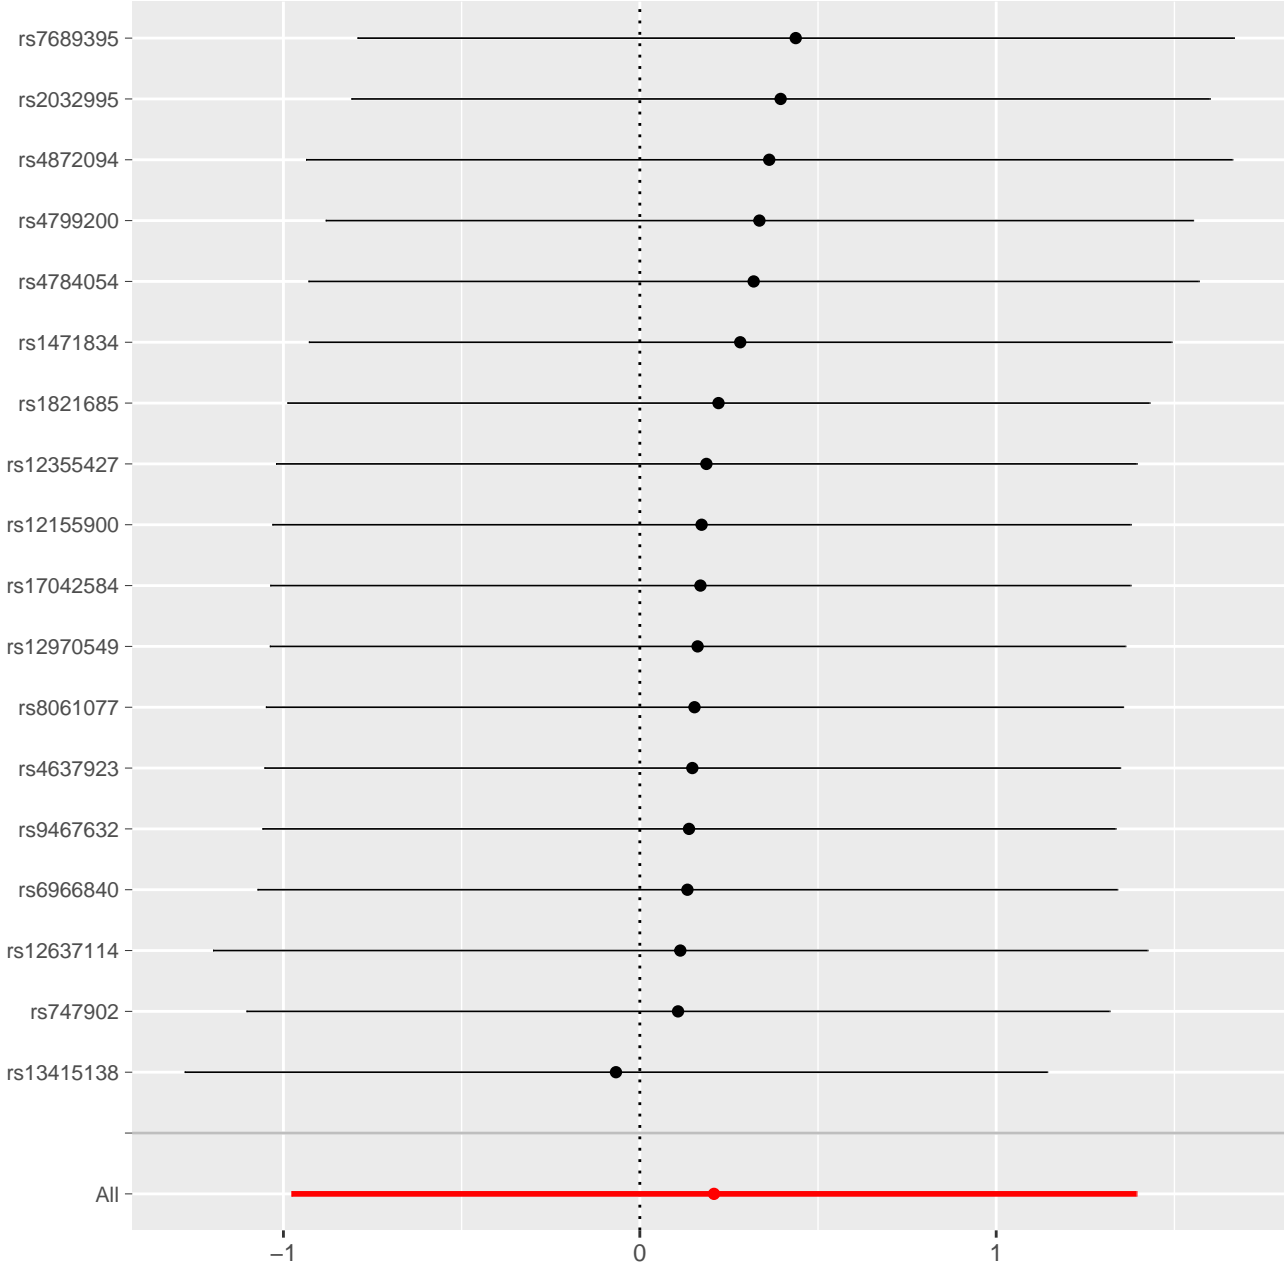

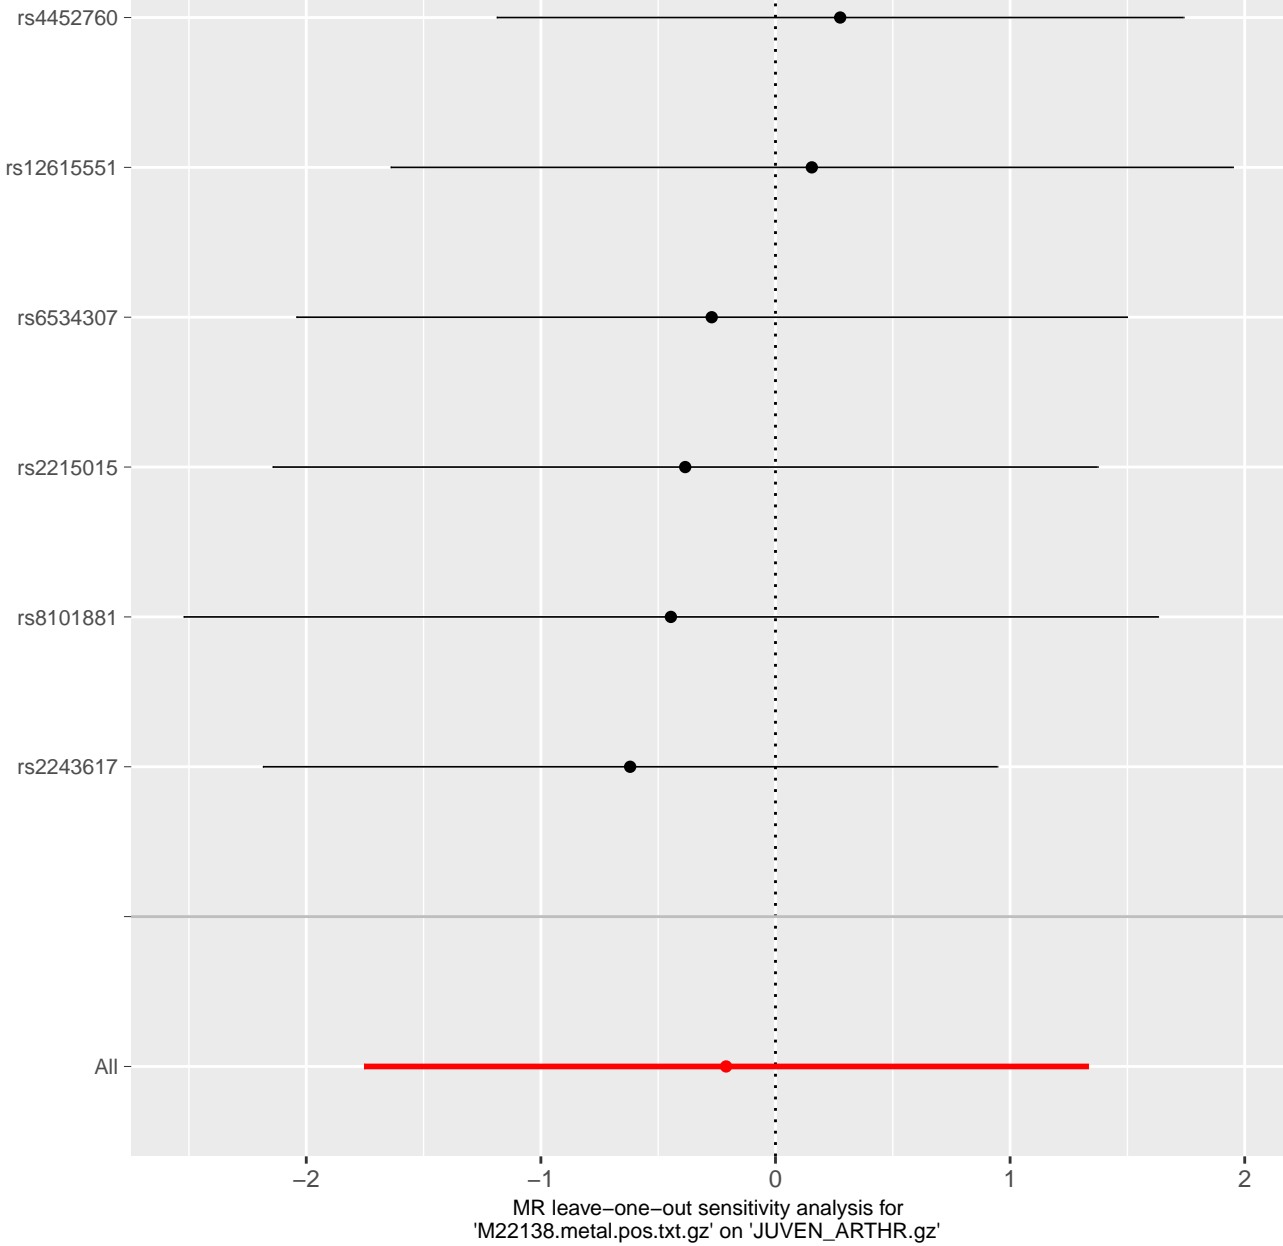

rs4351

rs2031504

rs13057057

rs495828

rs4968748

rs12143106

All

MR leave-one-out sensitivity analysis for 'M22175.metal.pos.txt.gz' on 'JUVEN\_ARTHR.gz'

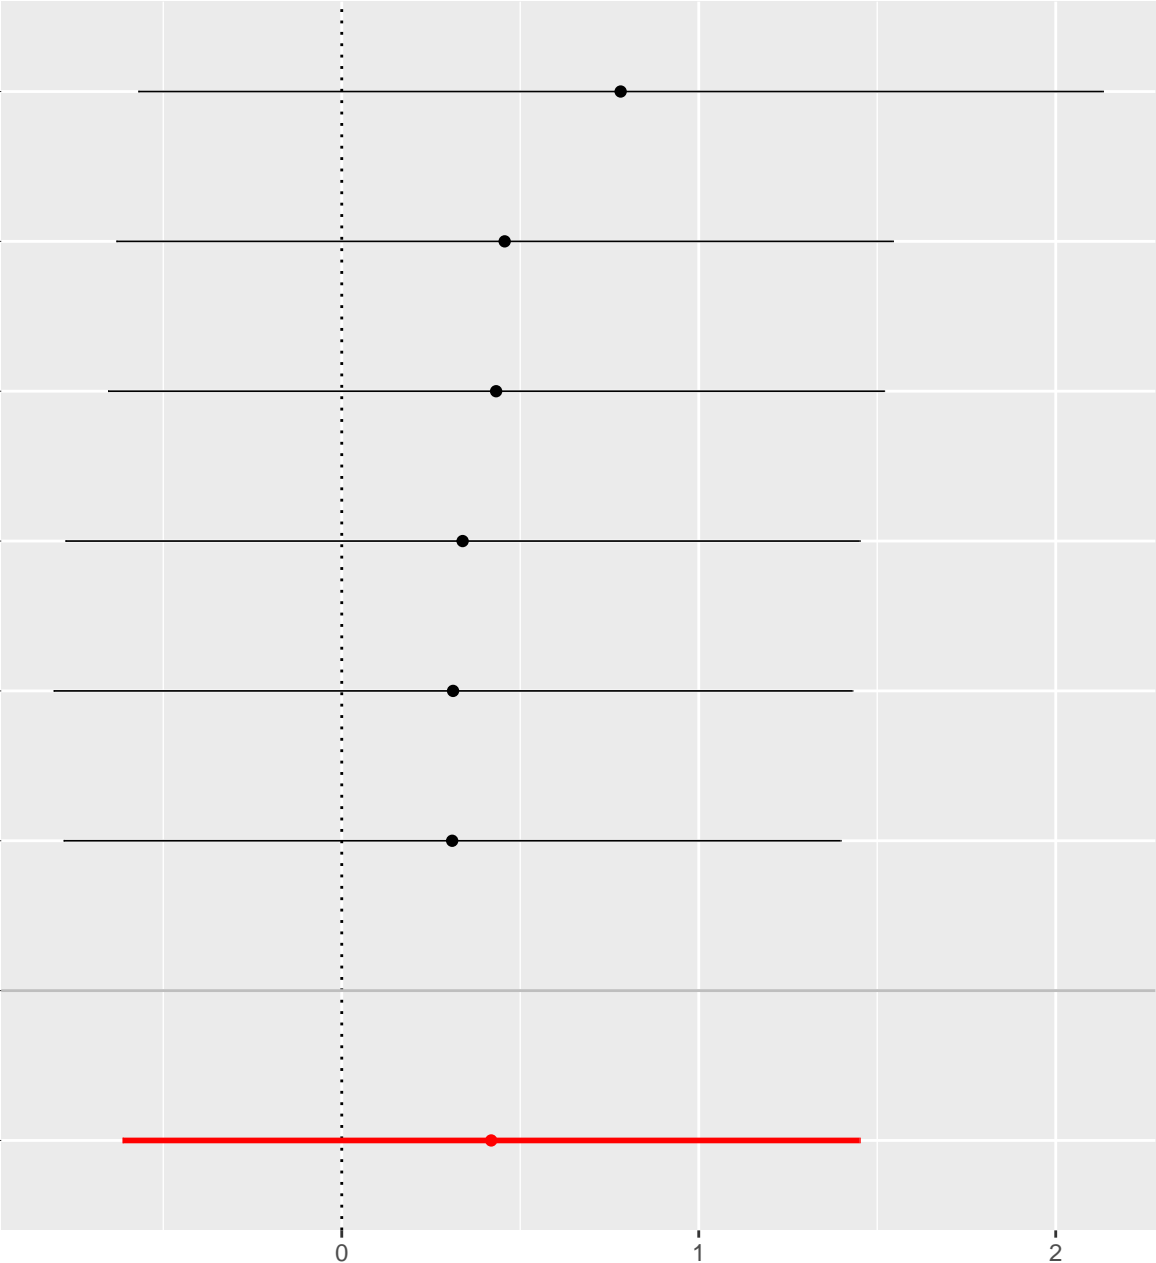



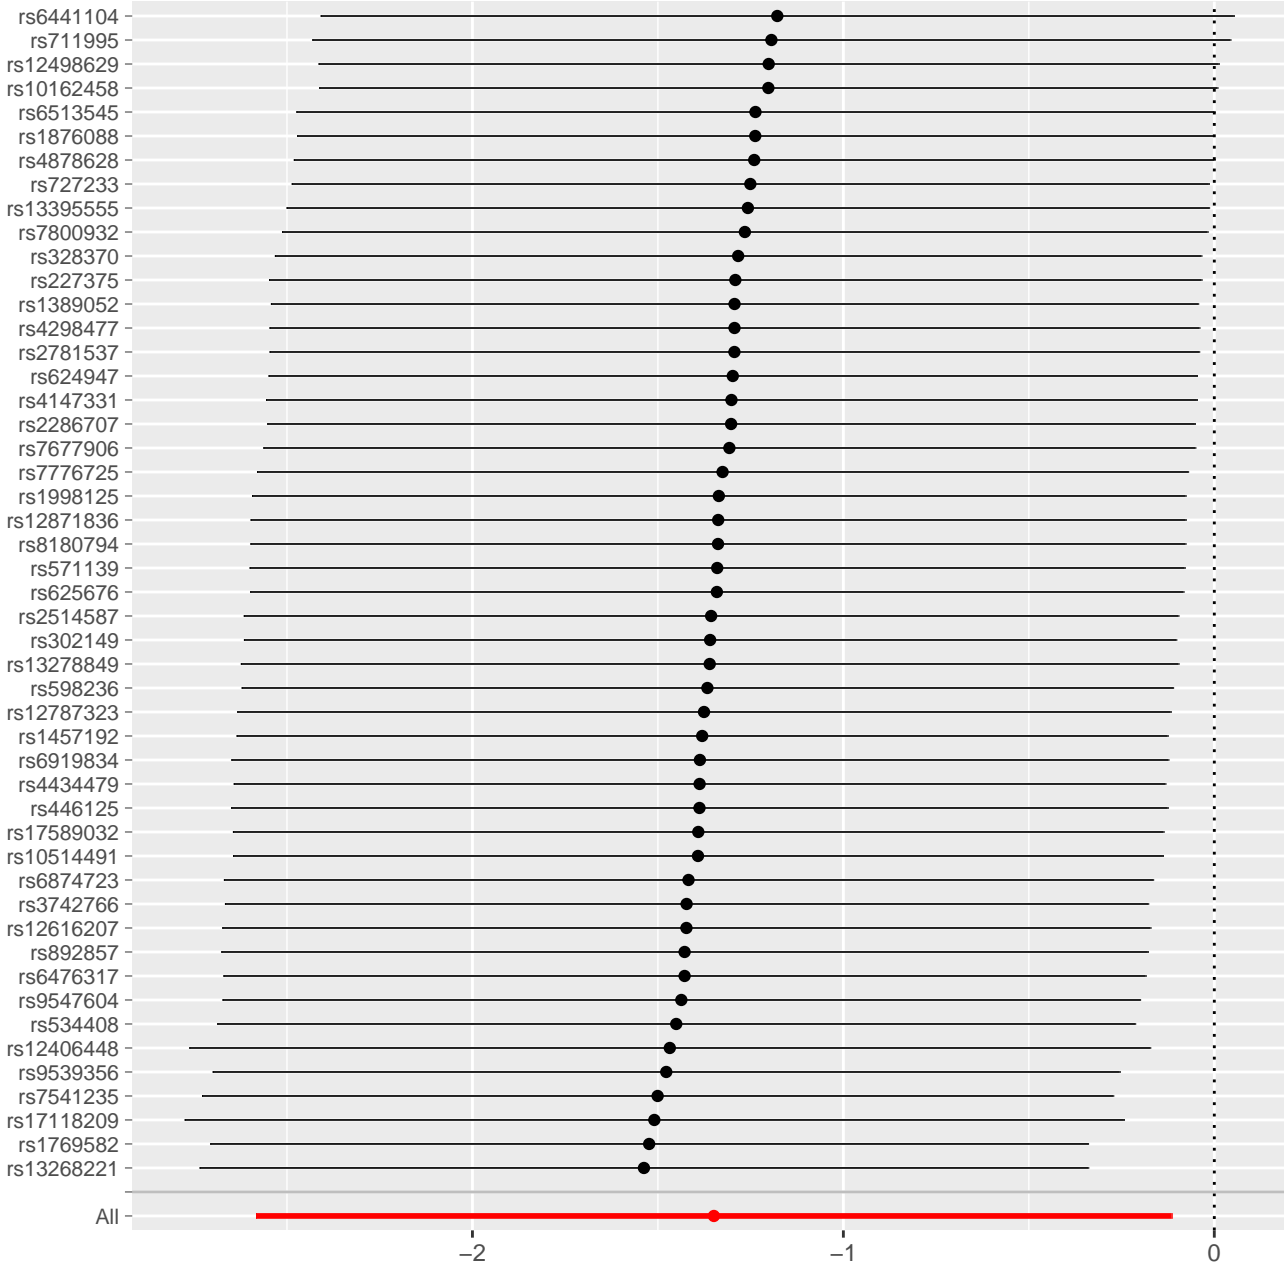

MR leave-one-out sensitivity analysis for 'M22177.metal.pos.txt.gz' on 'JUVEN\_ARTHR.gz'

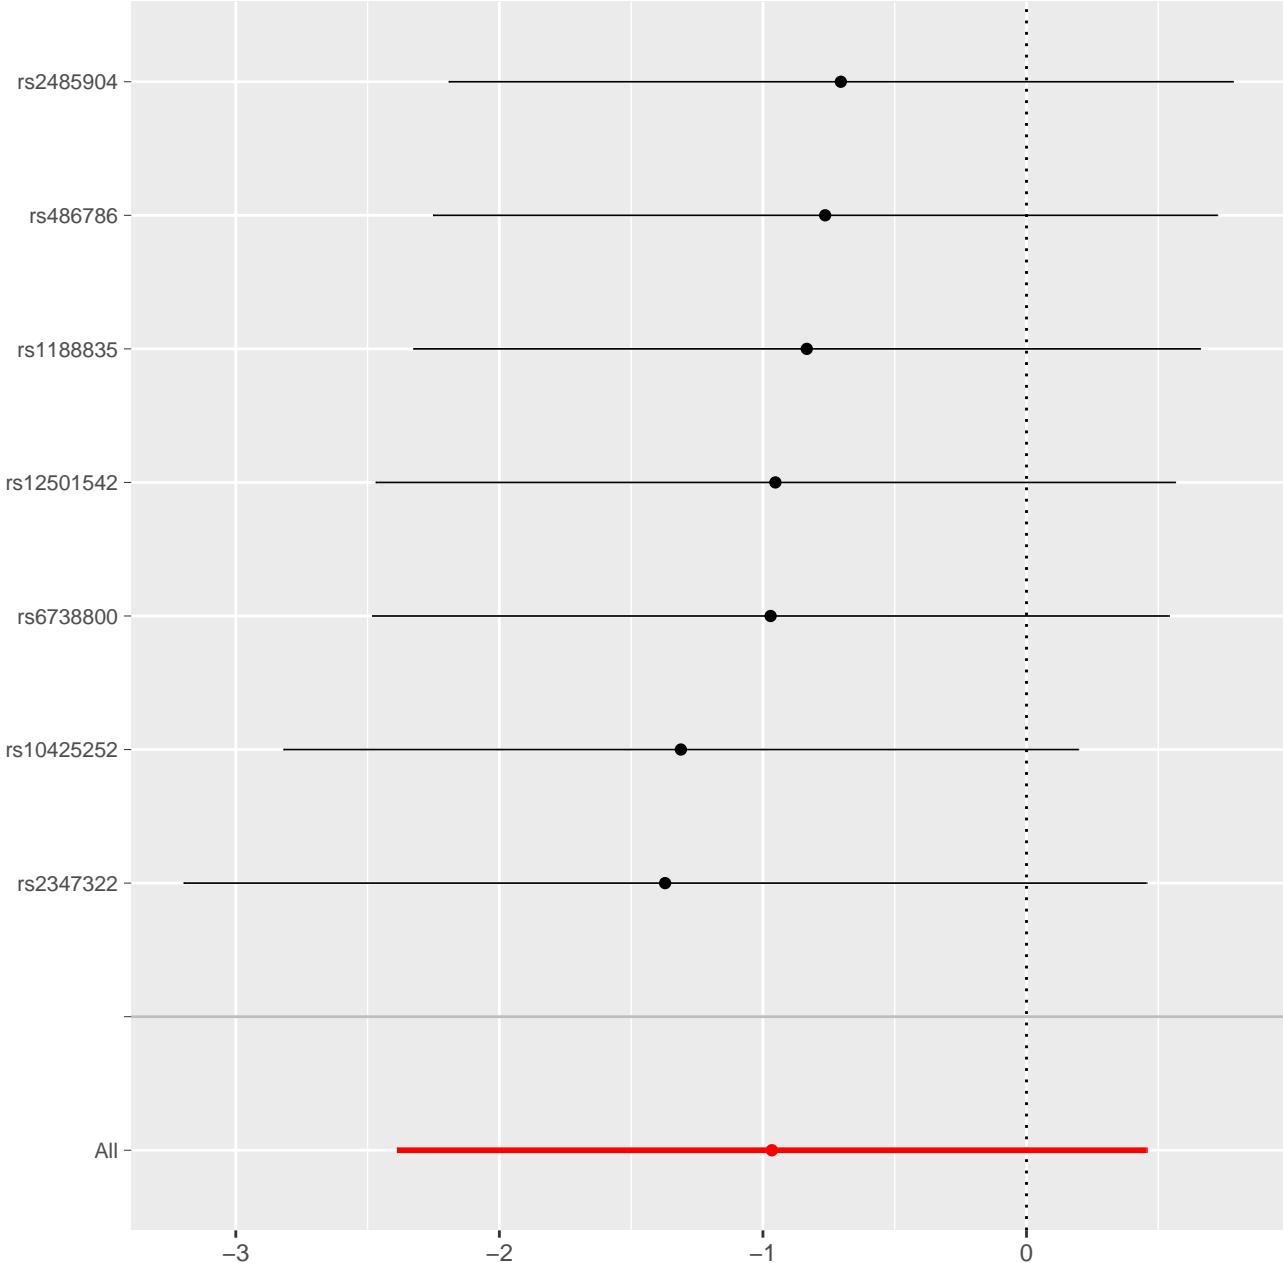

MR leave-one-out sensitivity analysis for 'M22189.metal.pos.txt.gz' on 'JUVEN\_ARTHR.gz'

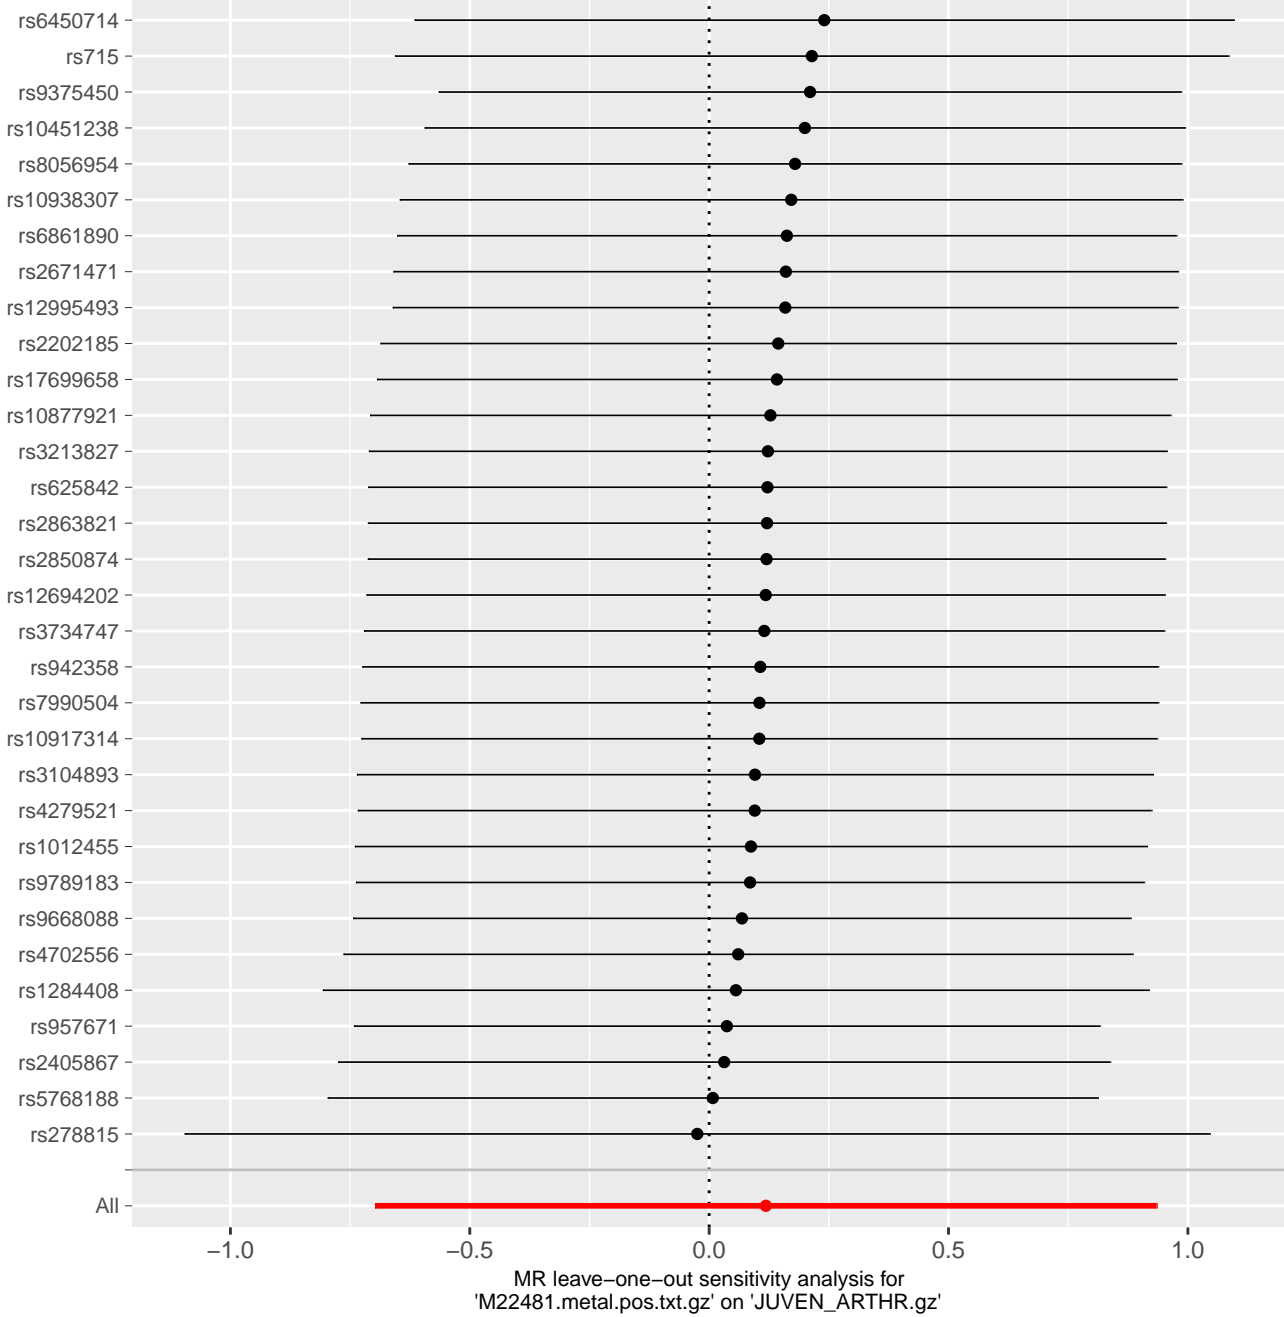

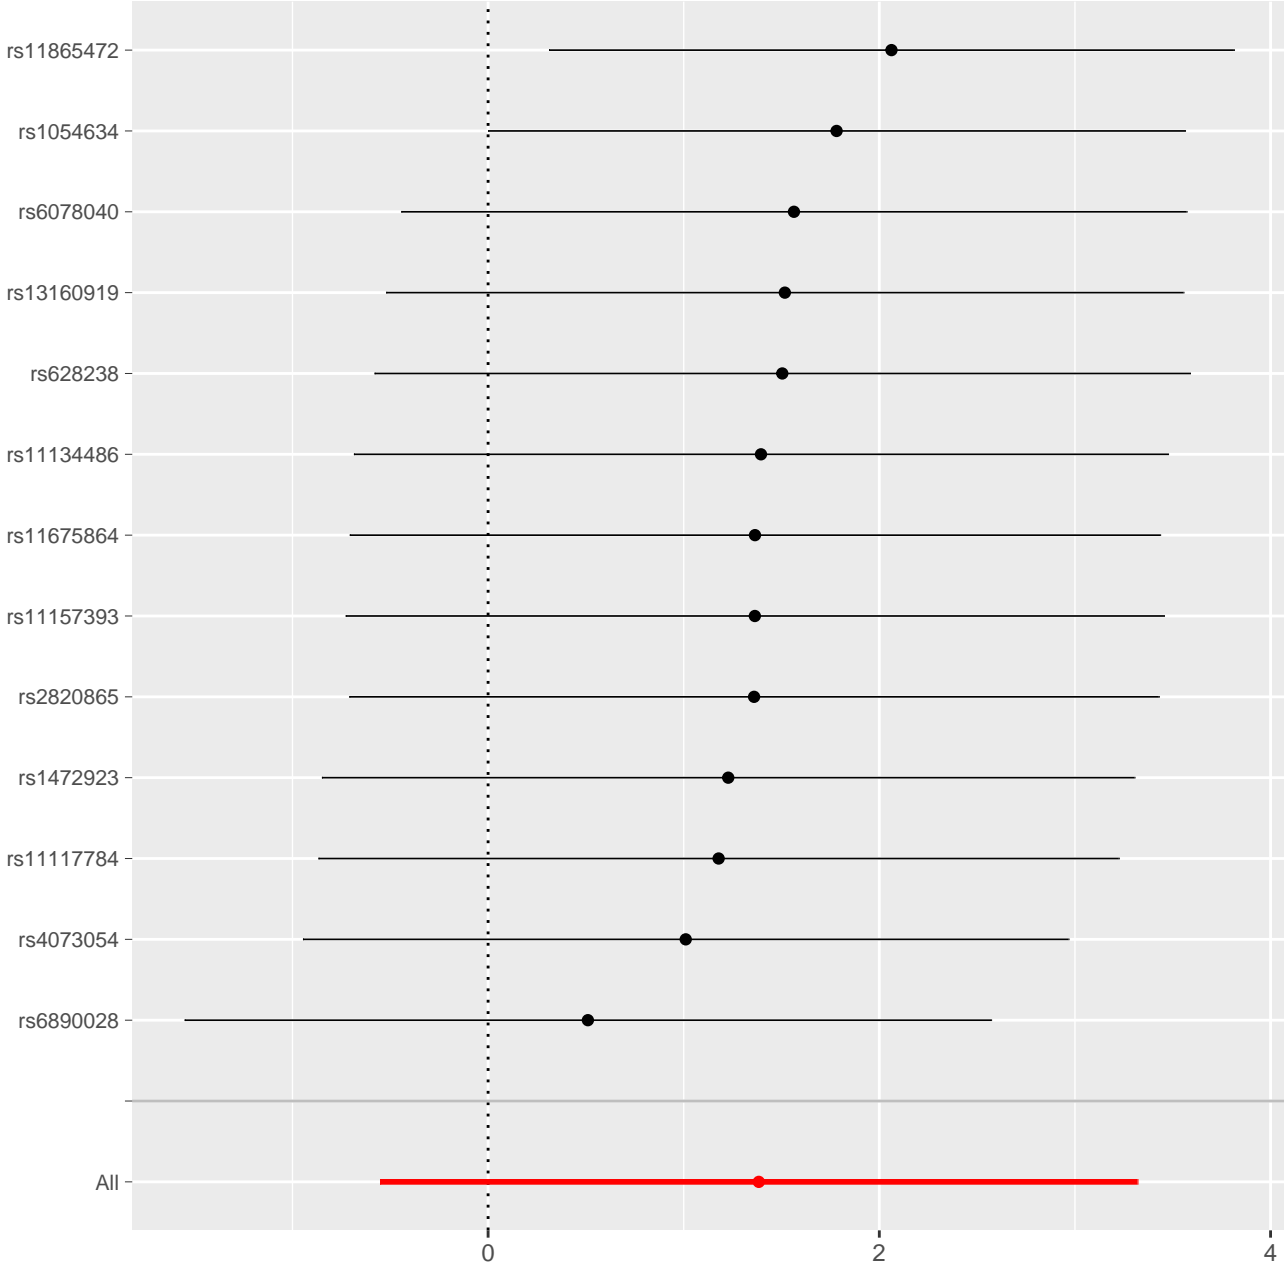

MR leave-one-out sensitivity analysis for 'M22548.metal.pos.txt.gz' on 'JUVEN\_ARTHR.gz'

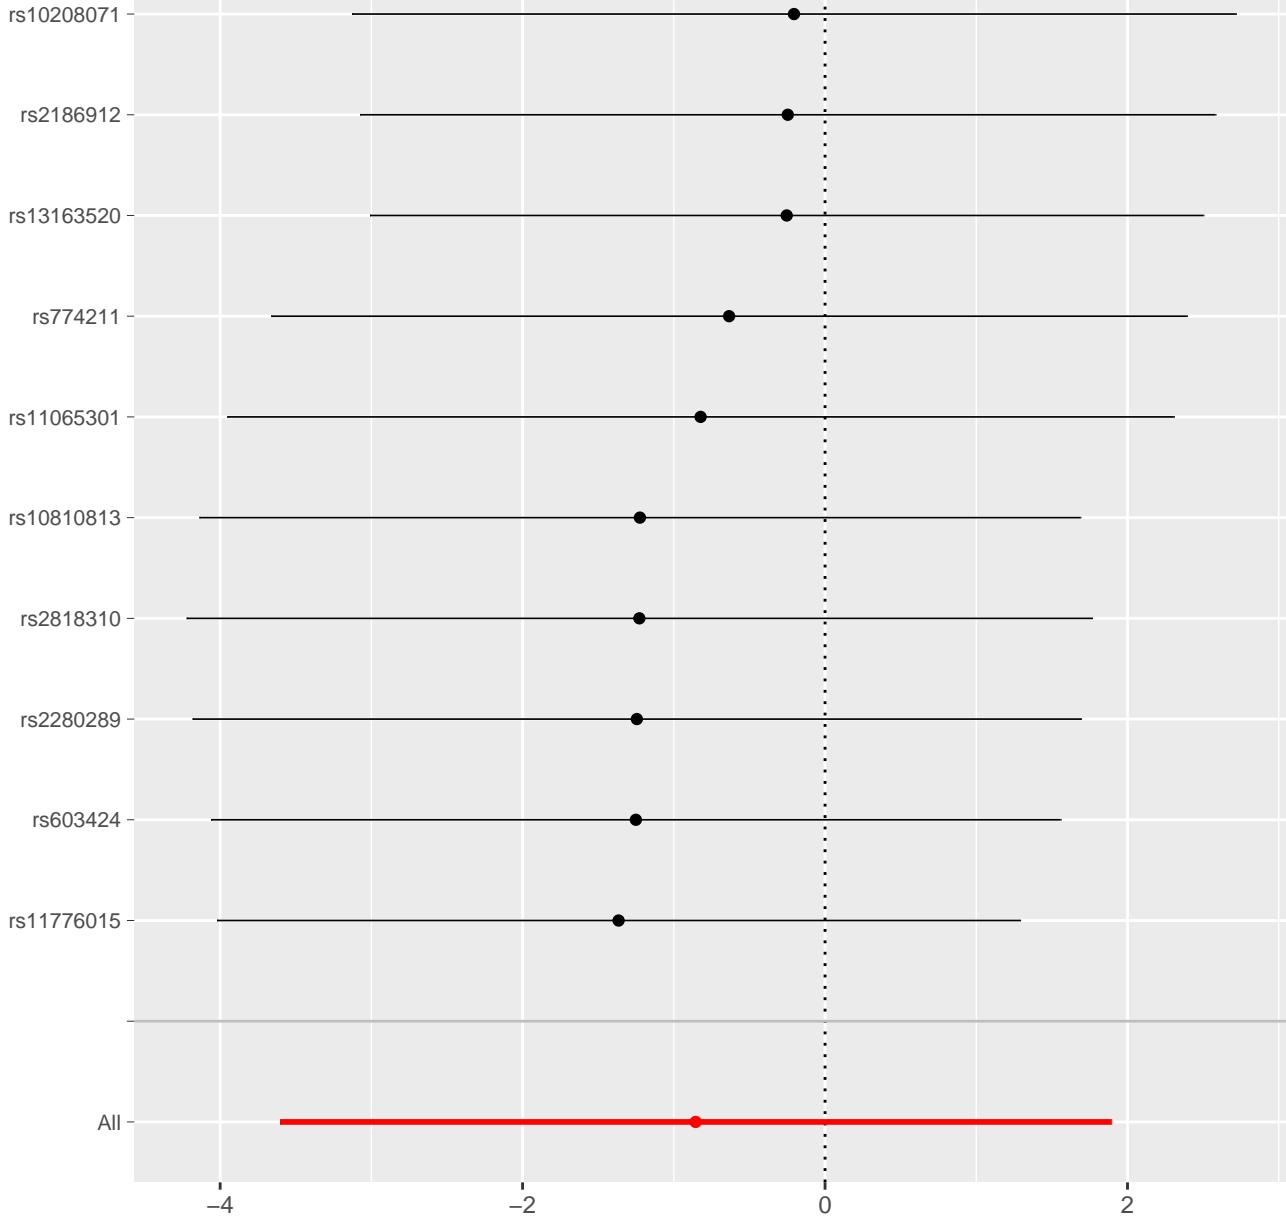

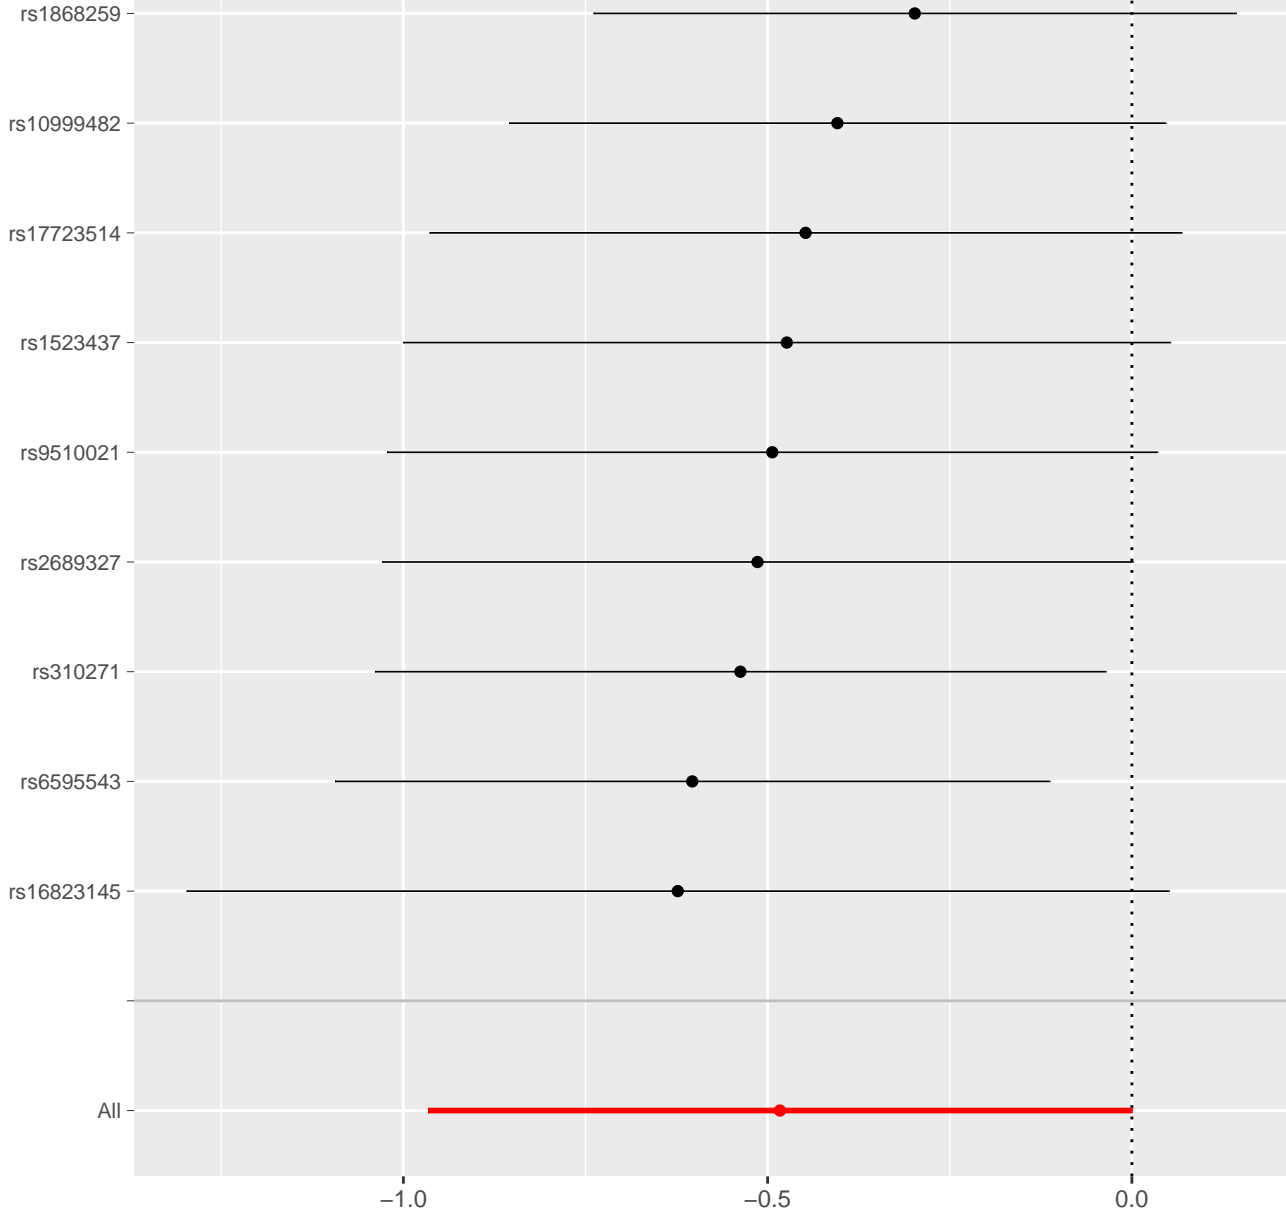

MR leave-one-out sensitivity analysis for 'M22842.metal.pos.txt.gz' on 'JUVEN\_ARTHR.gz'

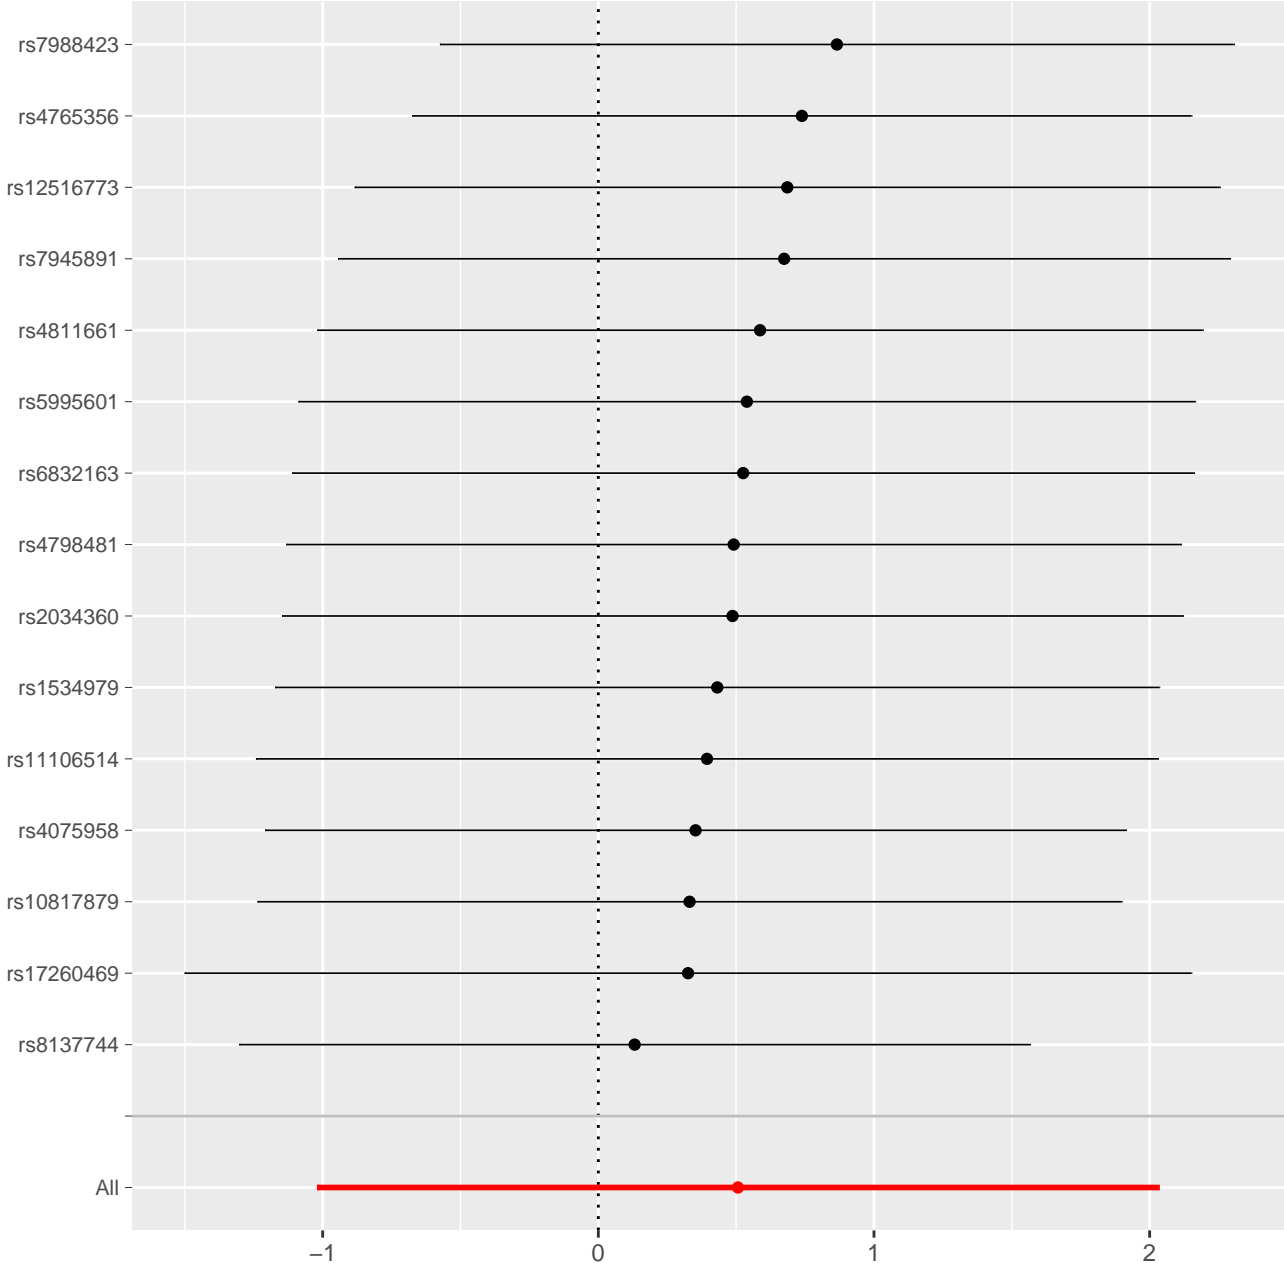

MR leave-one-out sensitivity analysis for 'M24074.metal.pos.txt.gz' on 'JUVEN\_ARTHR.gz'

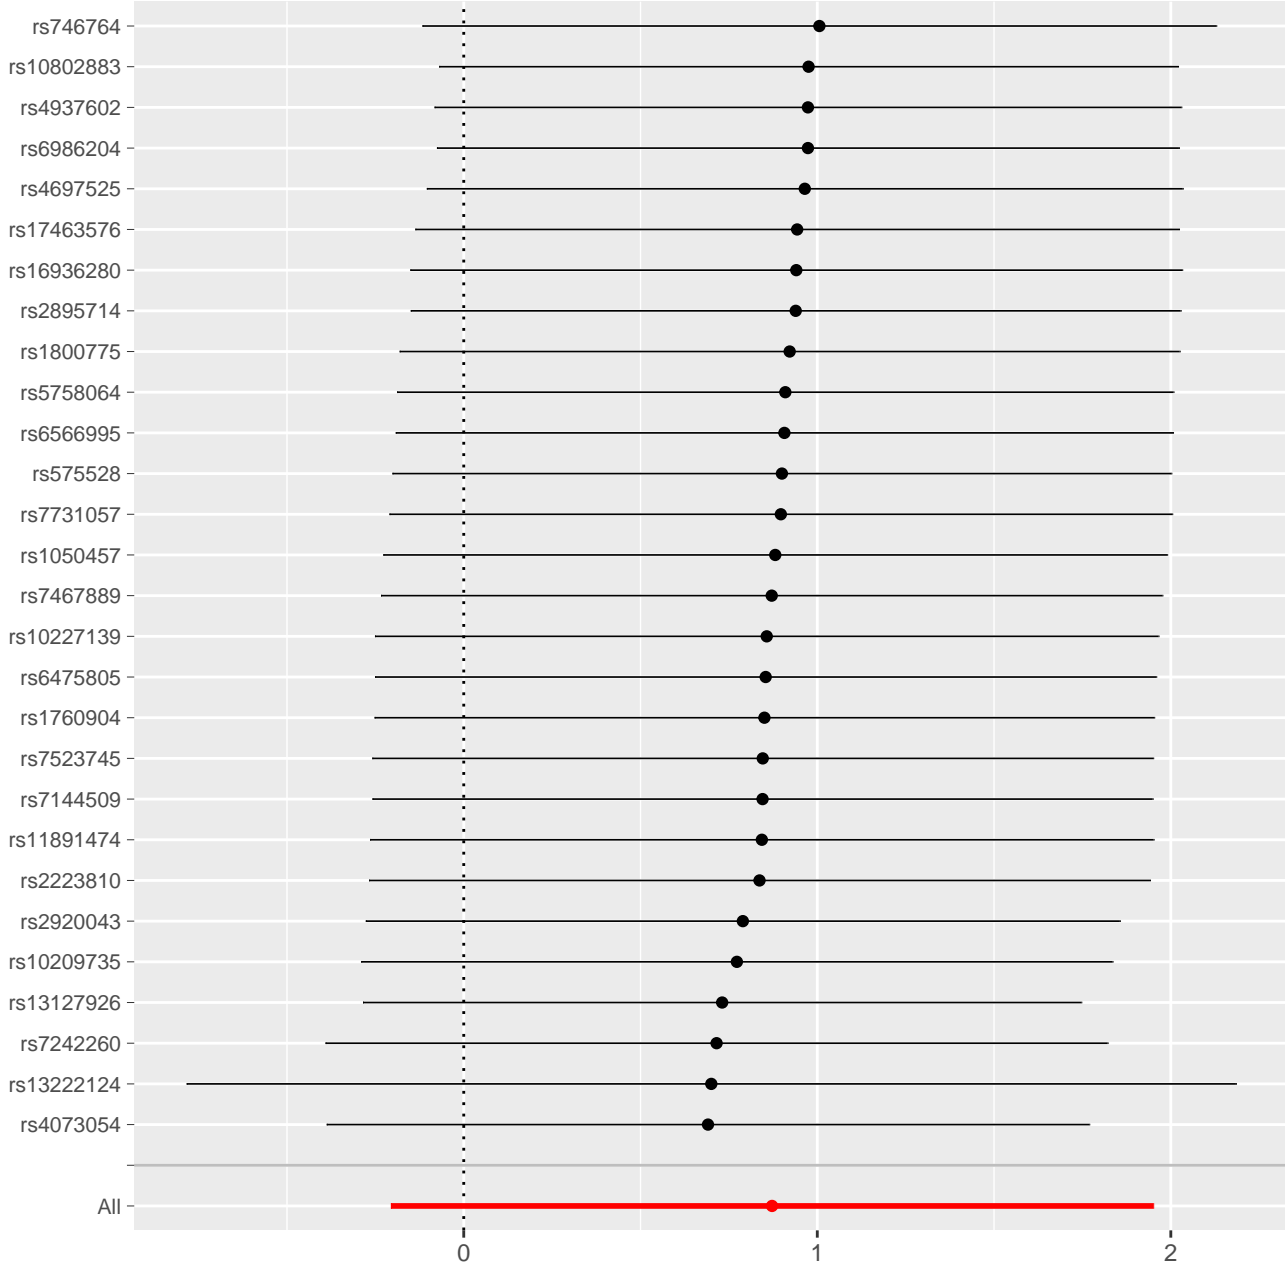

MR leave-one-out sensitivity analysis for 'M25459.metal.pos.txt.gz' on 'JUVEN\_ARTHR.gz'



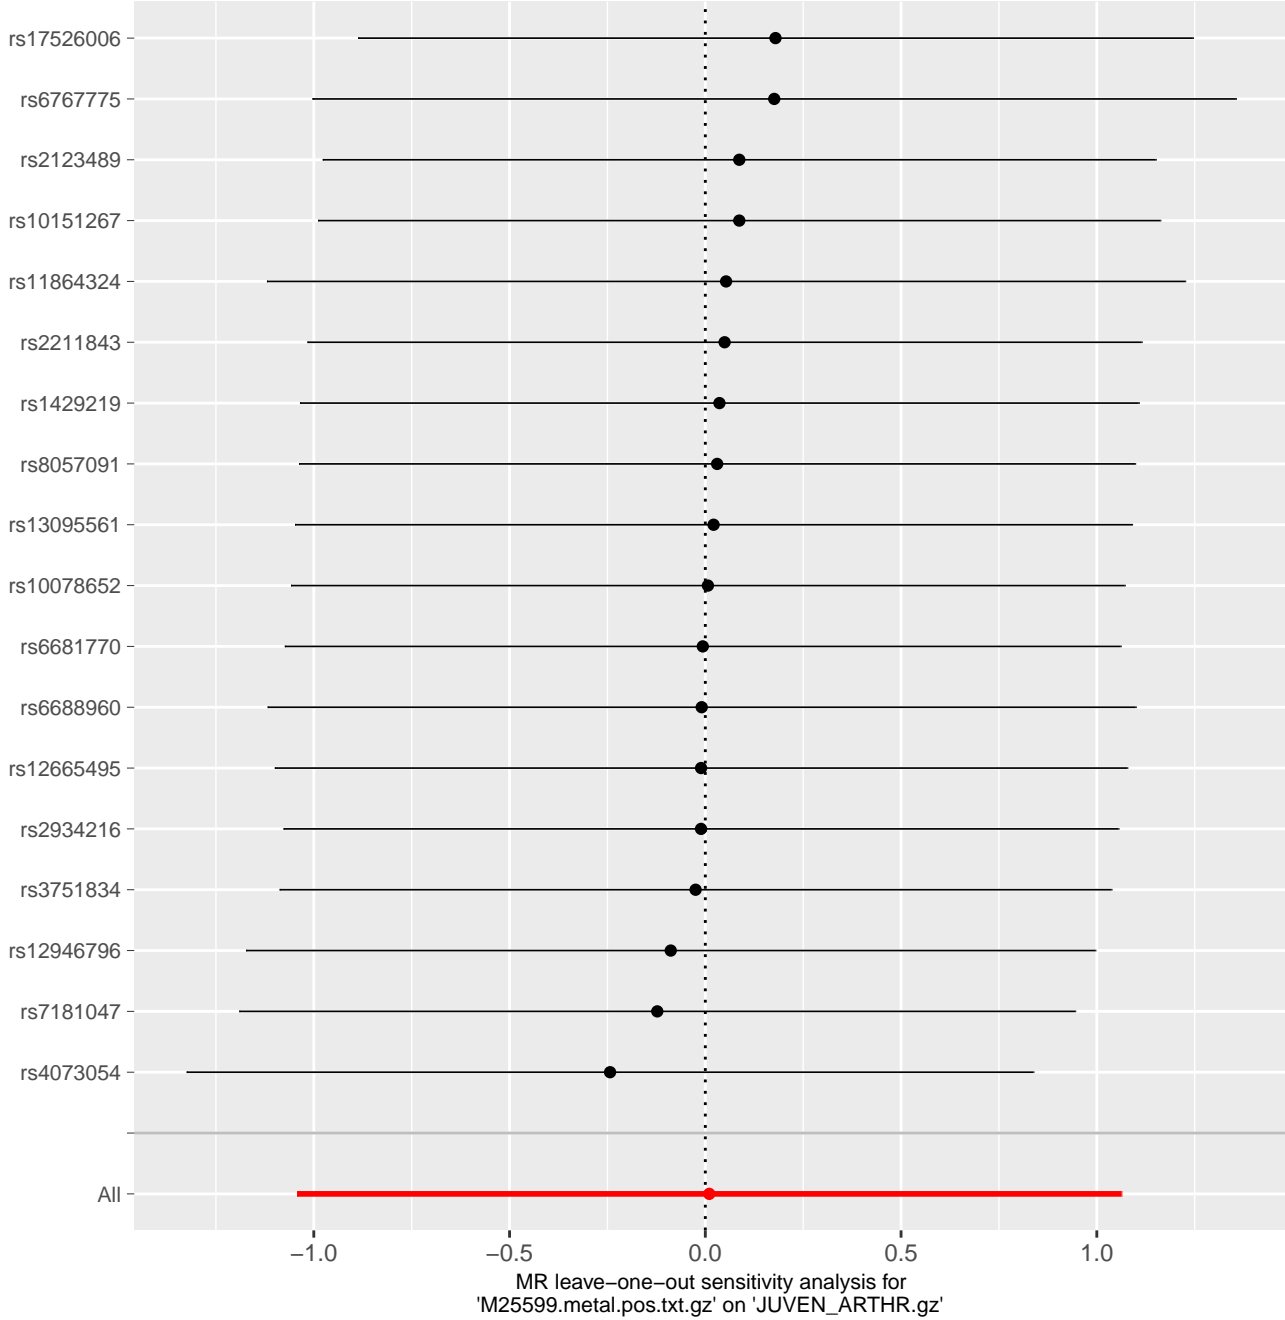

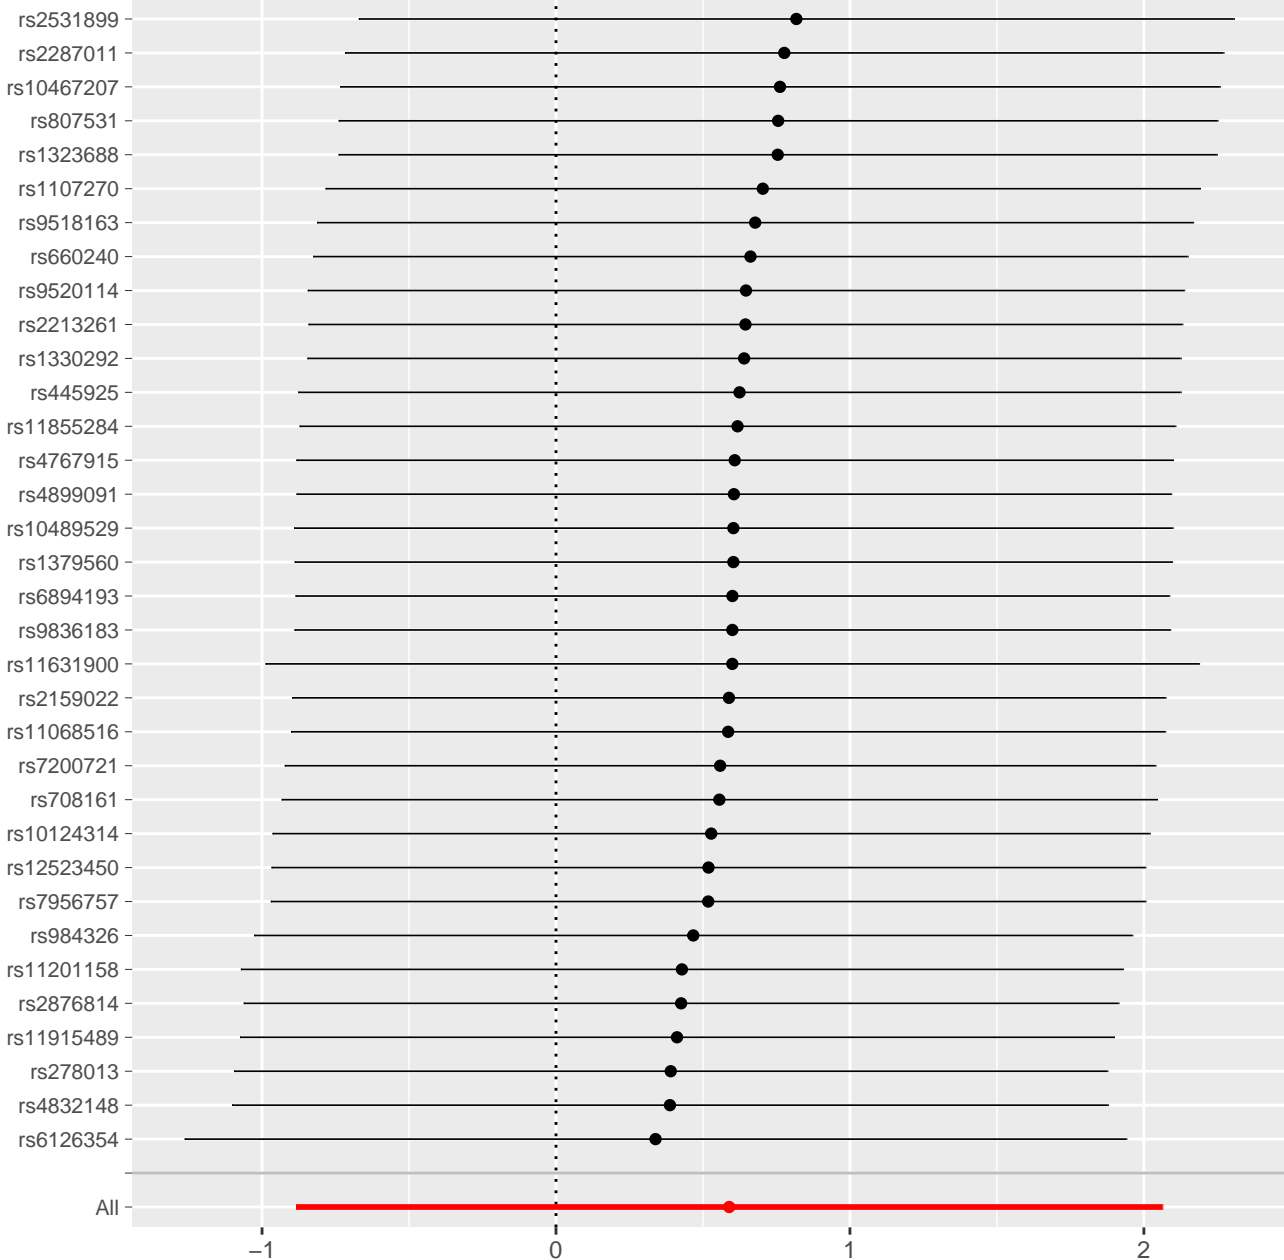

MR leave-one-out sensitivity analysis for 'M27256.metal.pos.txt.gz' on 'JUVEN\_ARTHR.gz'

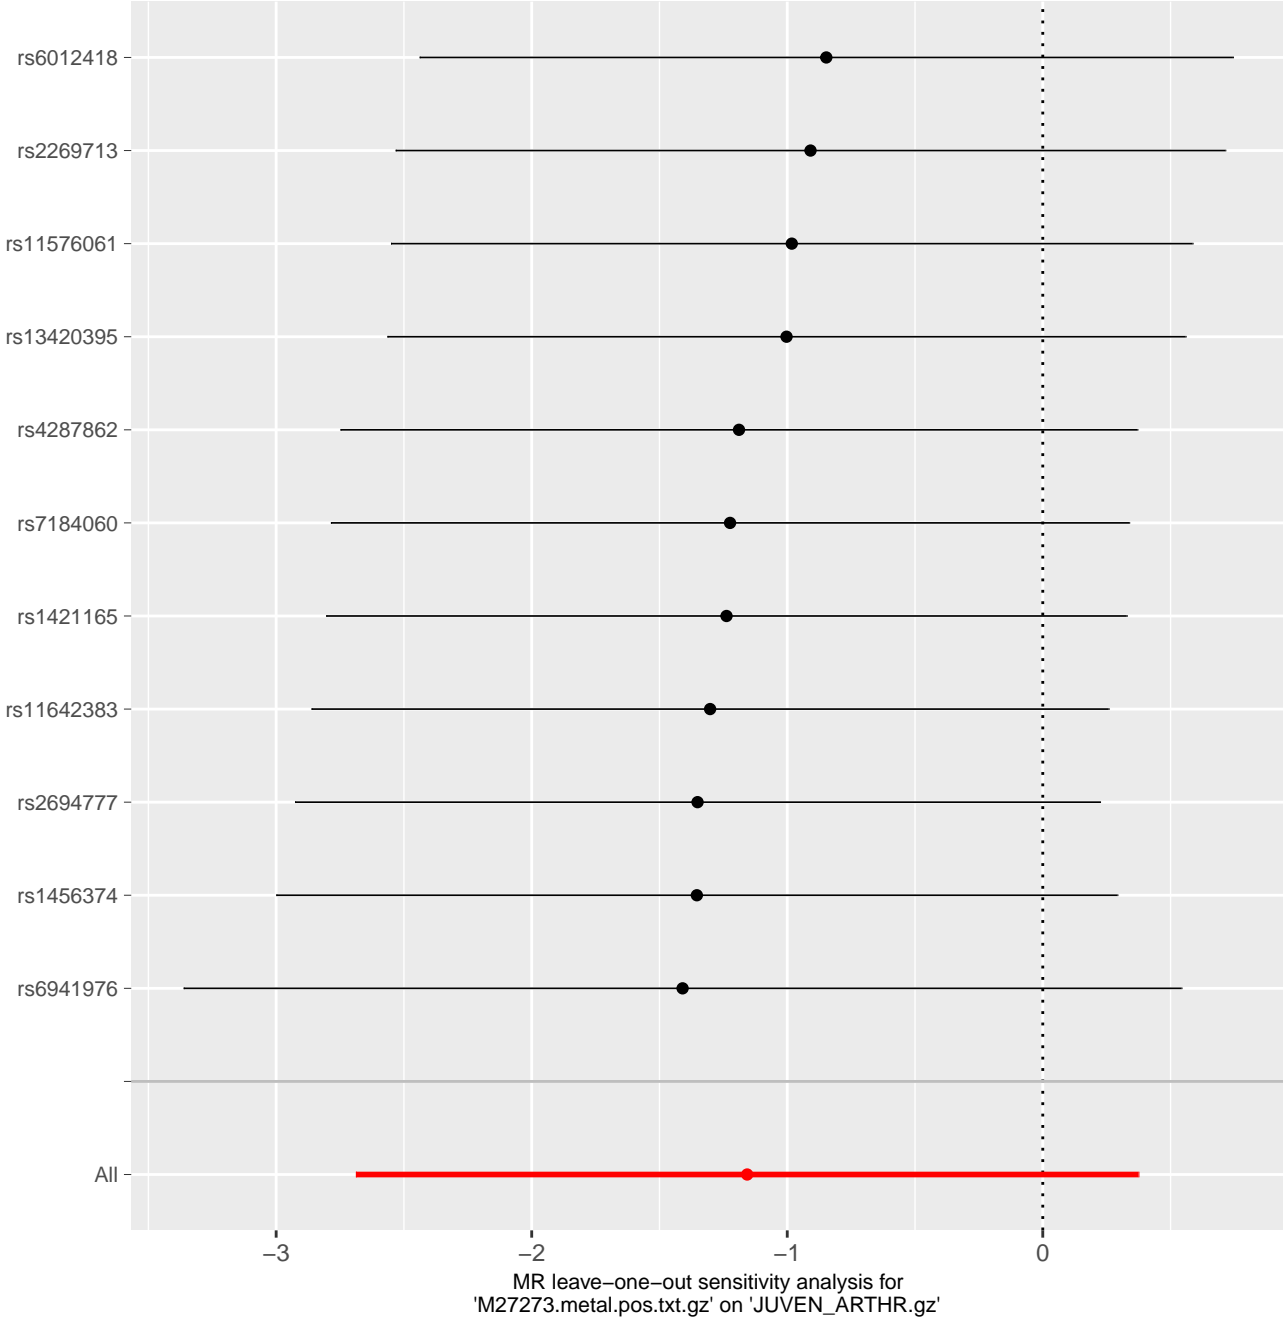

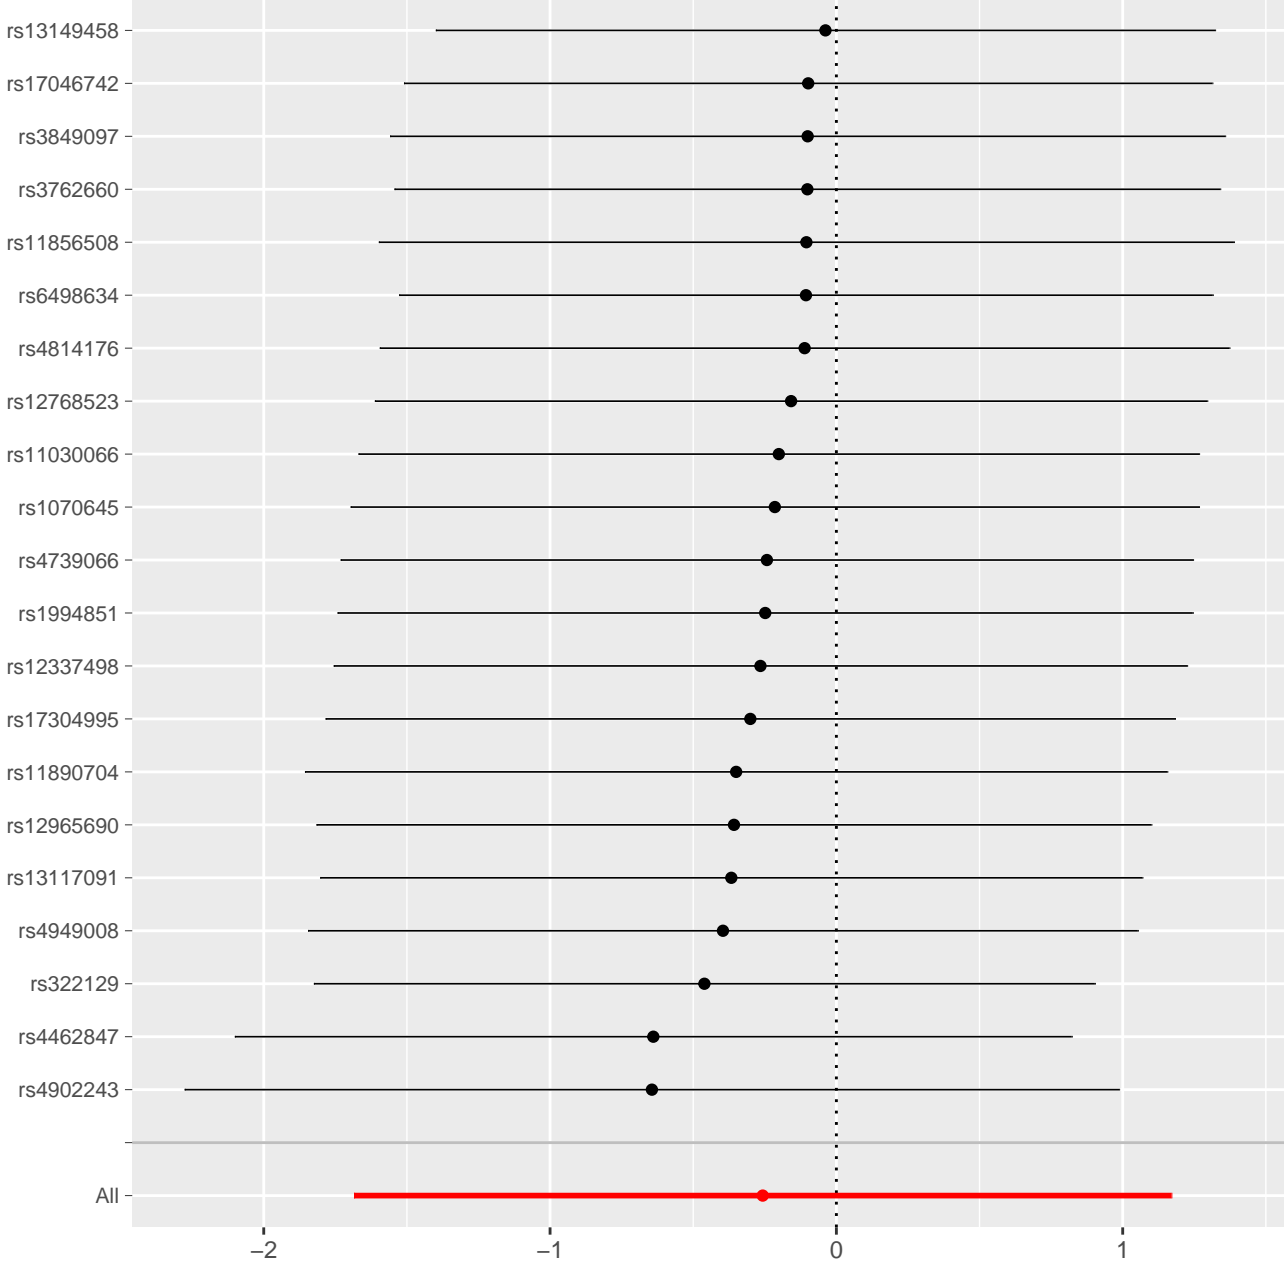

MR leave-one-out sensitivity analysis for 'M27278.metal.pos.txt.gz' on 'JUVEN\_ARTHR.gz'

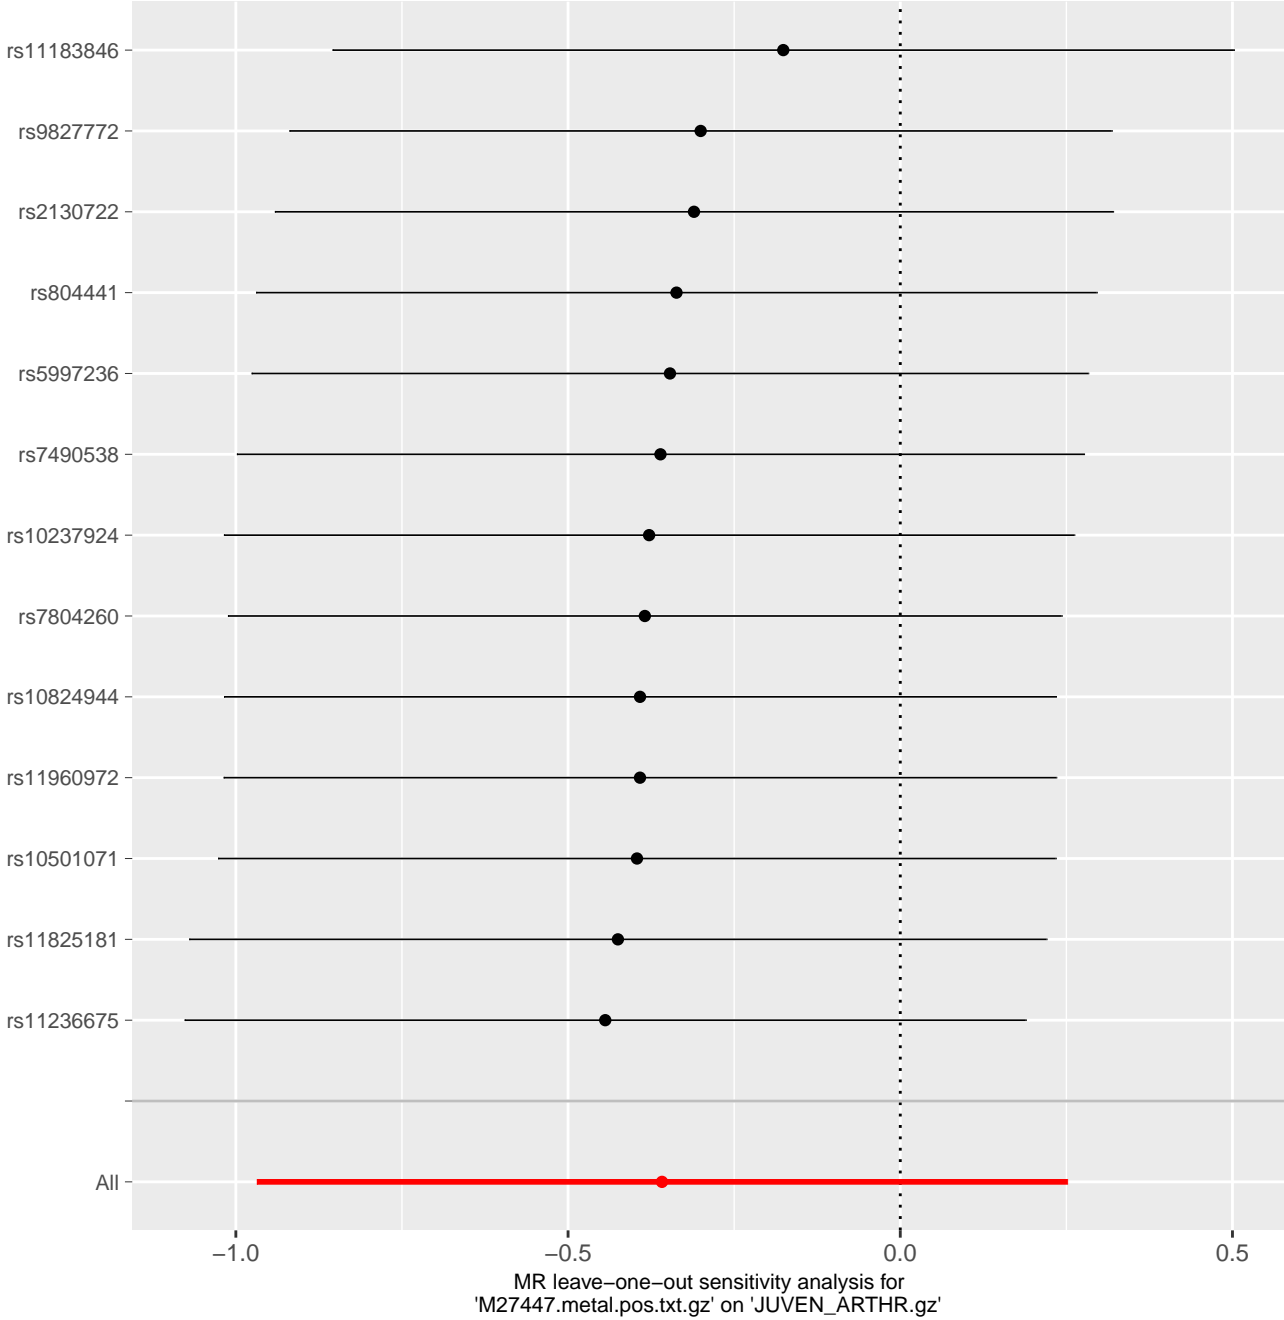

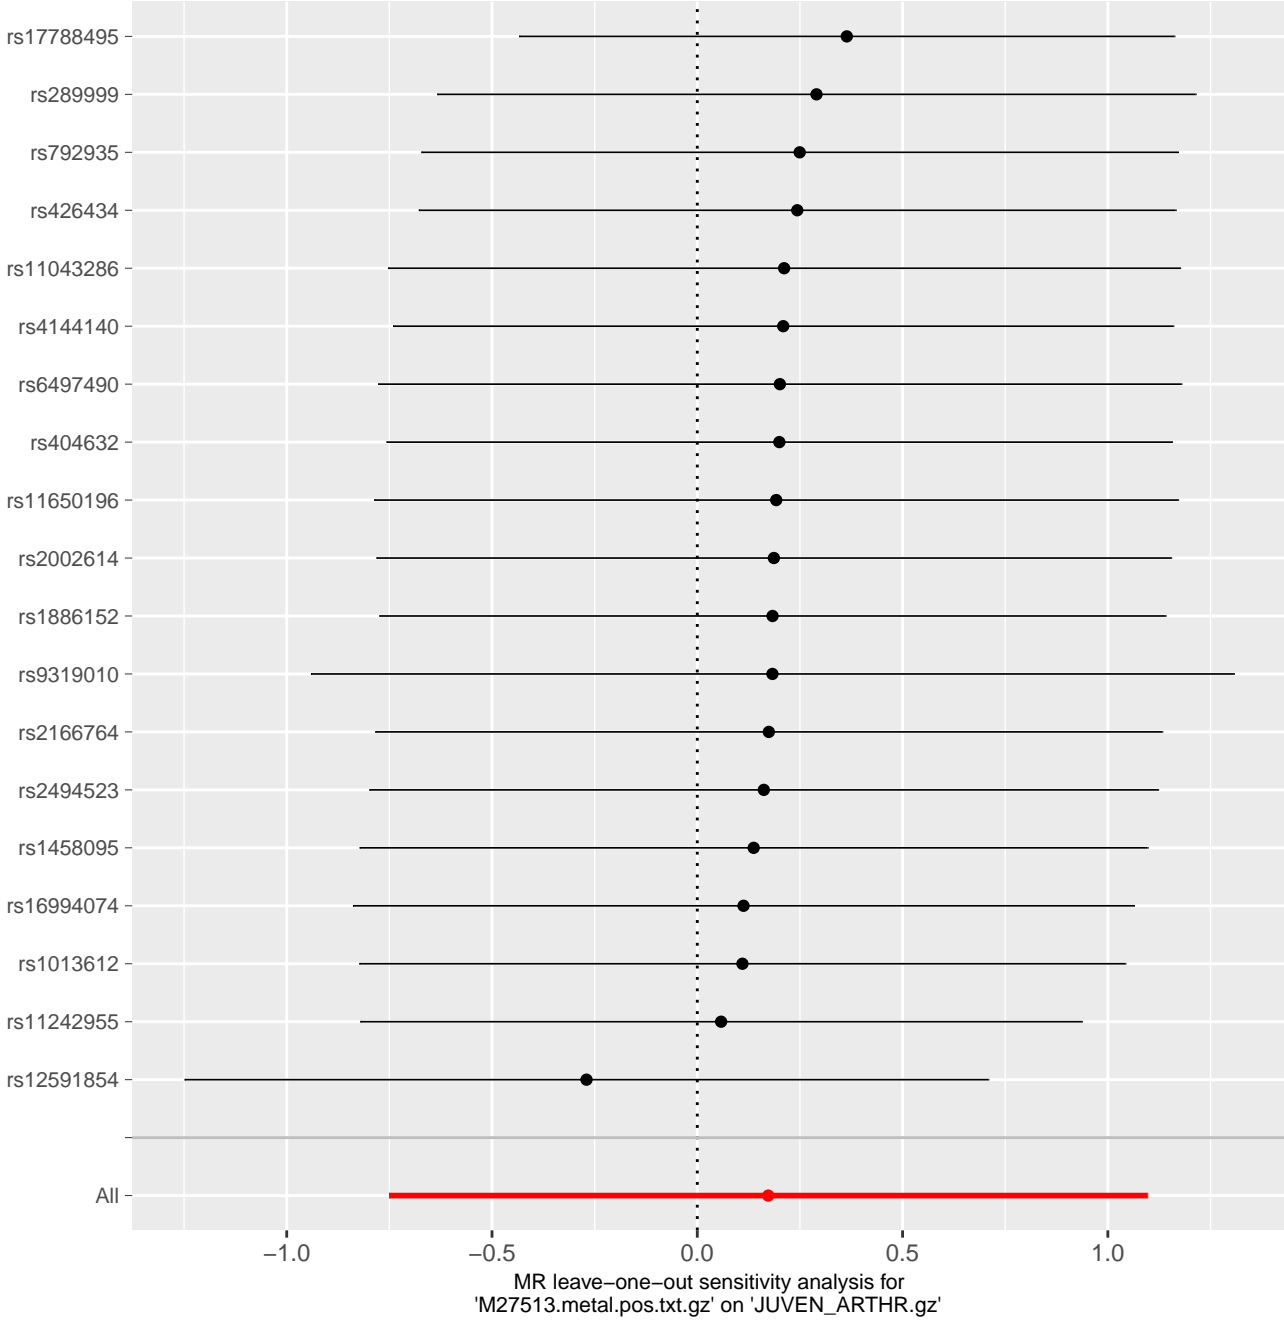

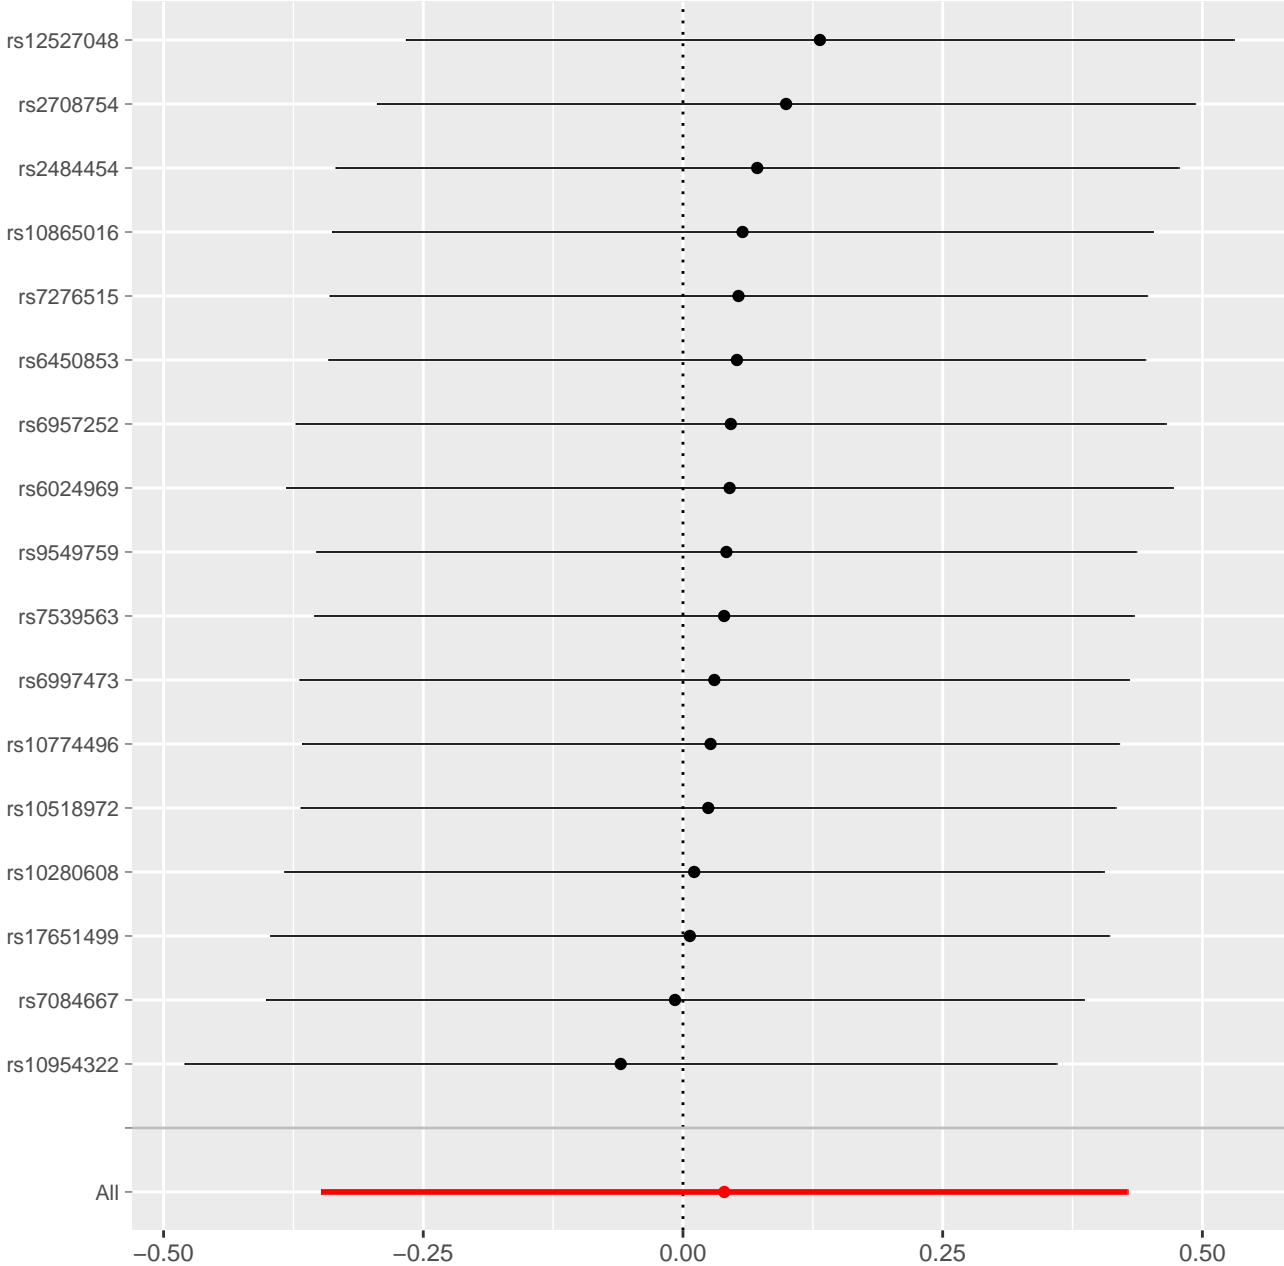

MR leave-one-out sensitivity analysis for 'M27531.metal.pos.txt.gz' on 'JUVEN\_ARTHR.gz'

rs5271140

rs9379897

rs10031835

rs9489956

rs3847067

All

-1

0

1

2

MR leave-one-out sensitivity analysis for  
'M27672.metal.pos.txt.gz' on 'JUVEN\_ARTHR.gz'

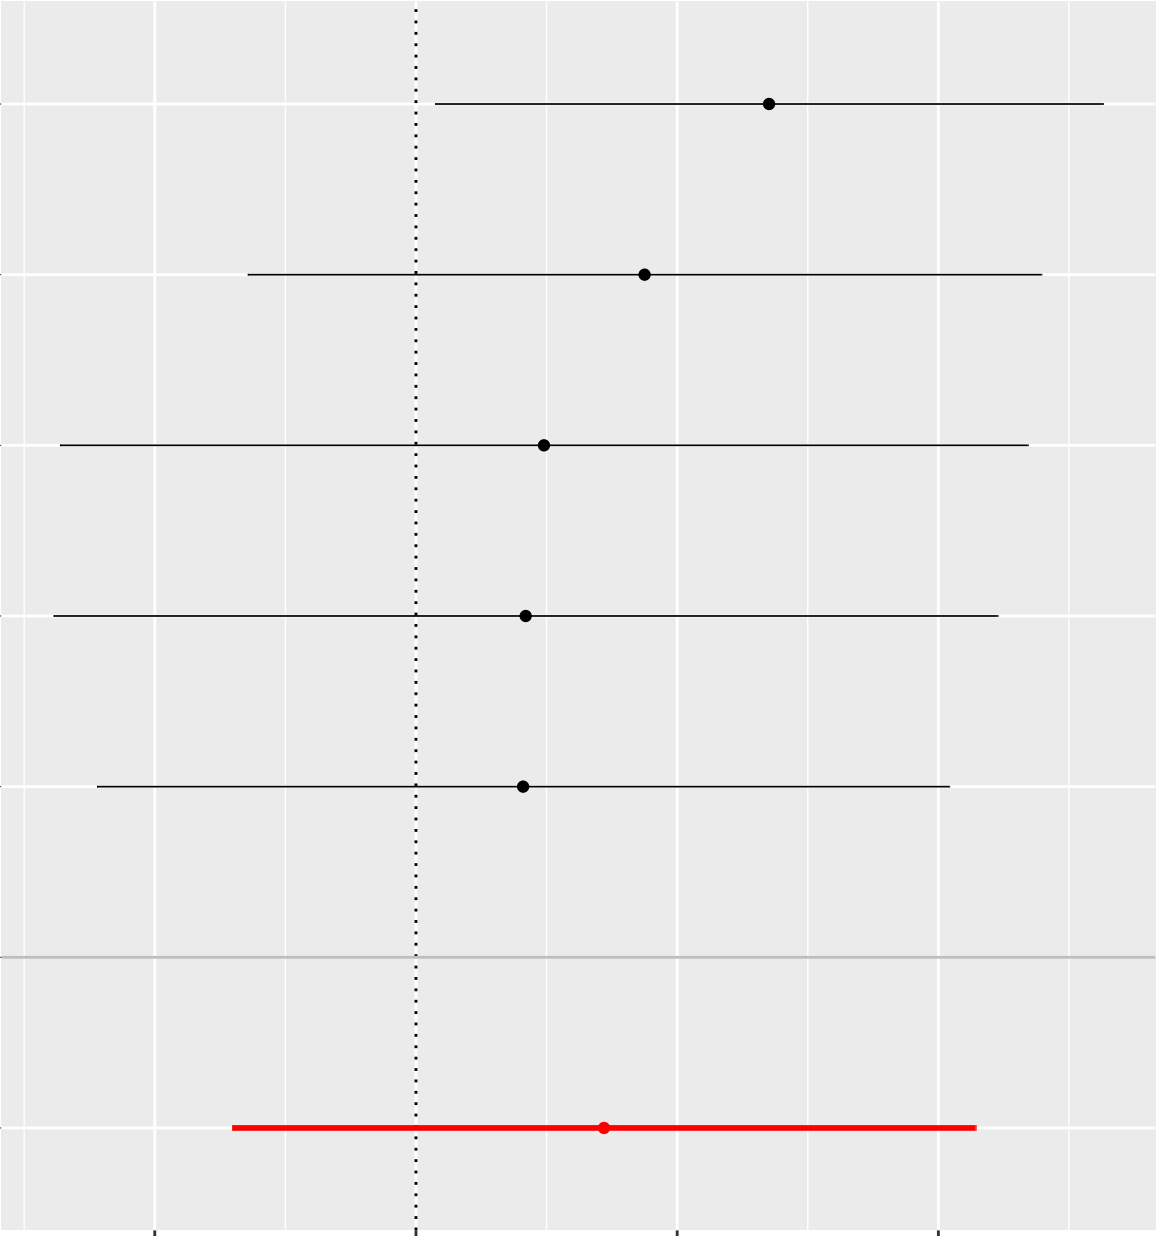



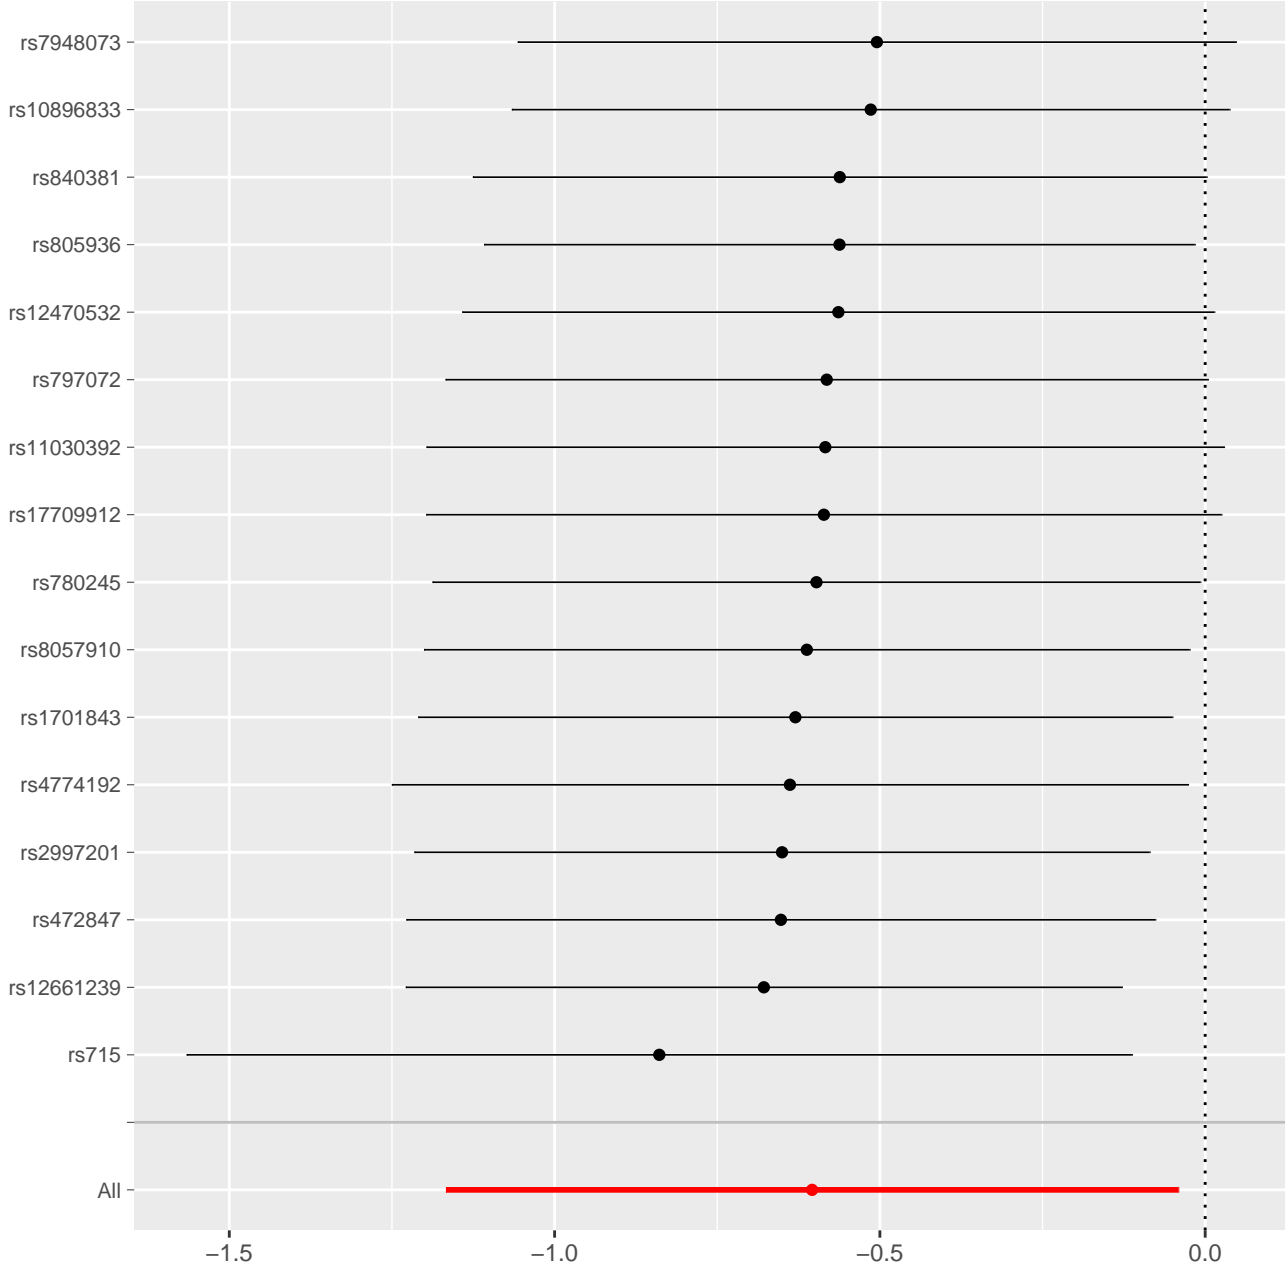

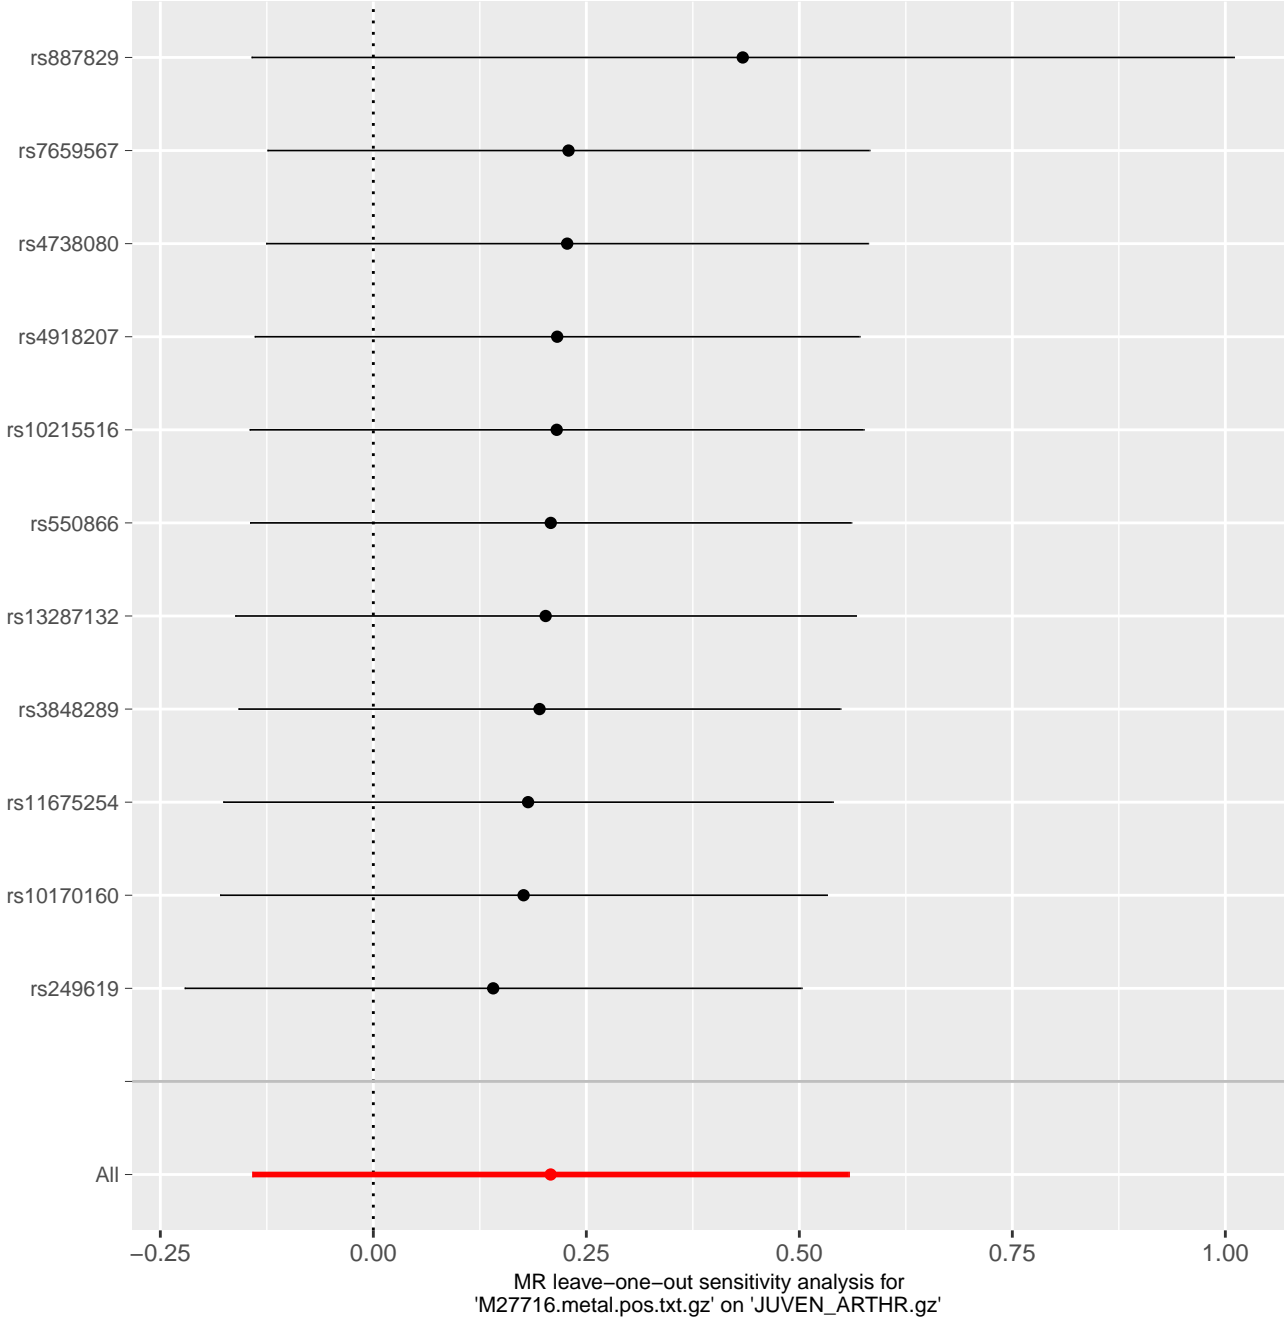

rs3817670  
rs10900120  
rs1145077  
rs715  
rs7319920  
rs12820743  
rs3111102  
All

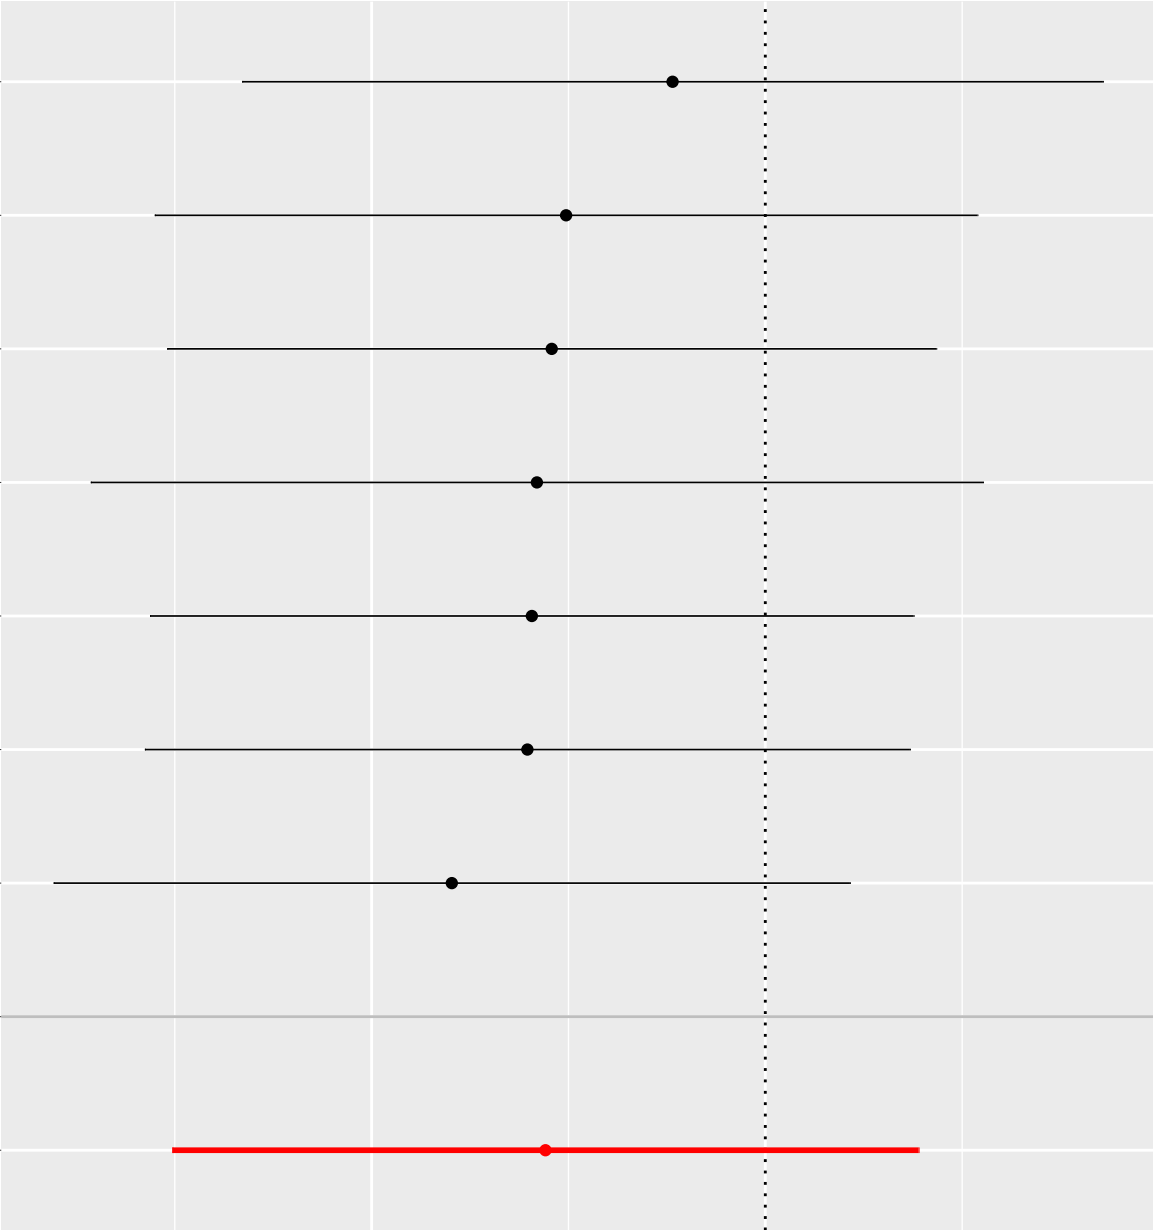

MR leave-one-out sensitivity analysis for 'M27718.metal.pos.txt.gz' on 'JUVEN\_ARTHR.gz'

rs4692675

rs9346668

rs7289147

rs11891974

rs12216333

rs17046195

All

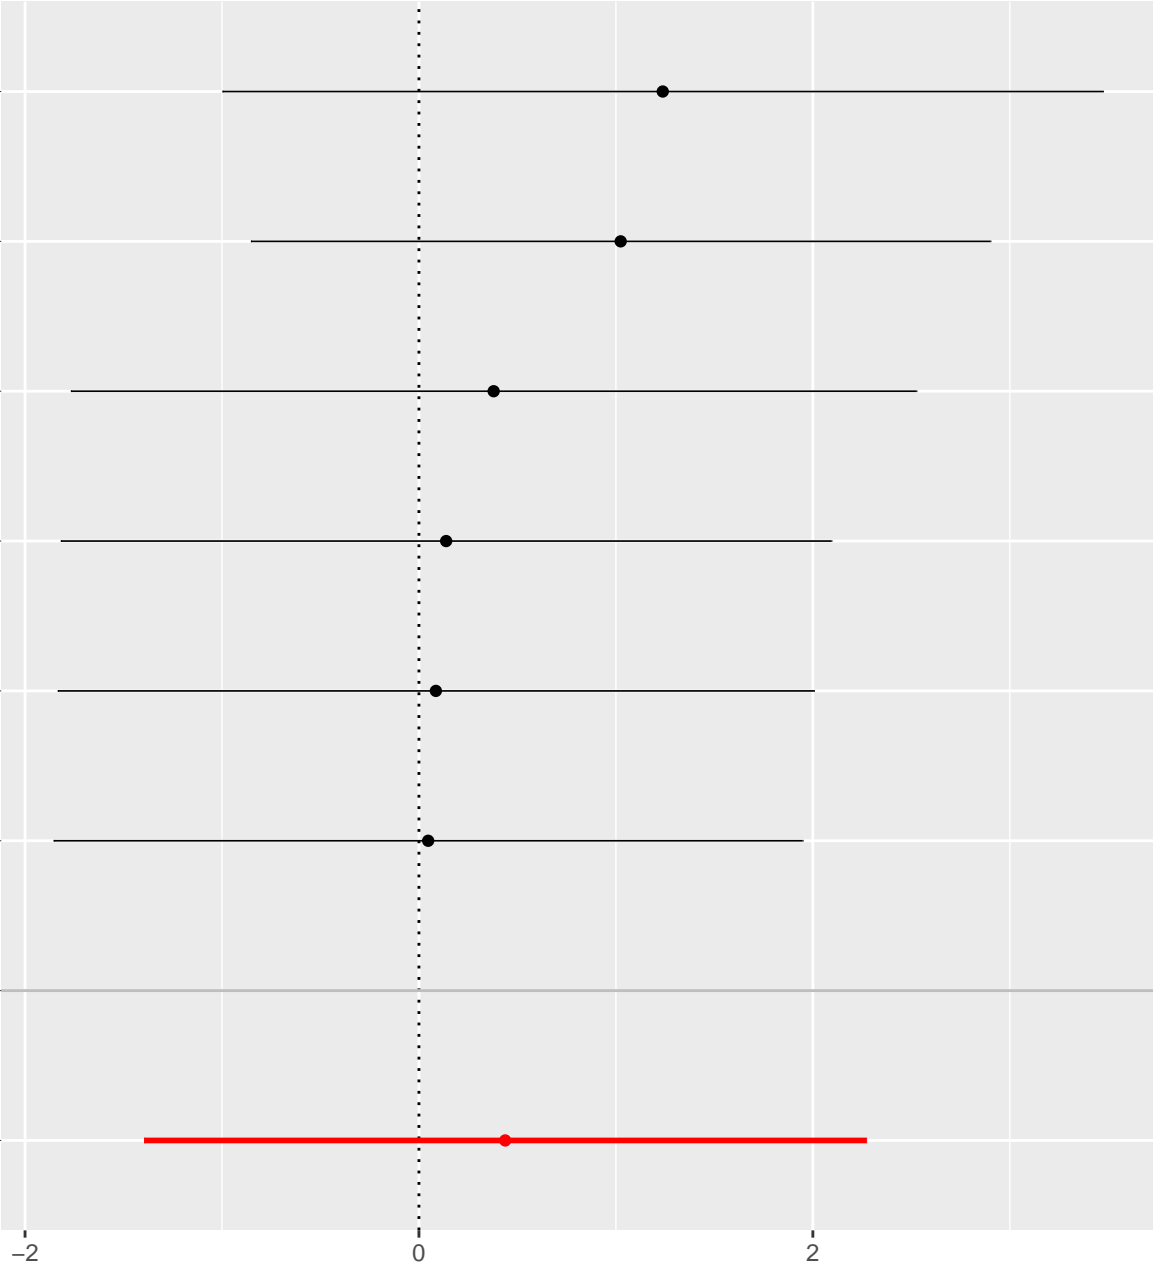

MR leave-one-out sensitivity analysis for 'M27722.metal.pos.txt.gz' on 'JUVEN\_ARTHR.gz'

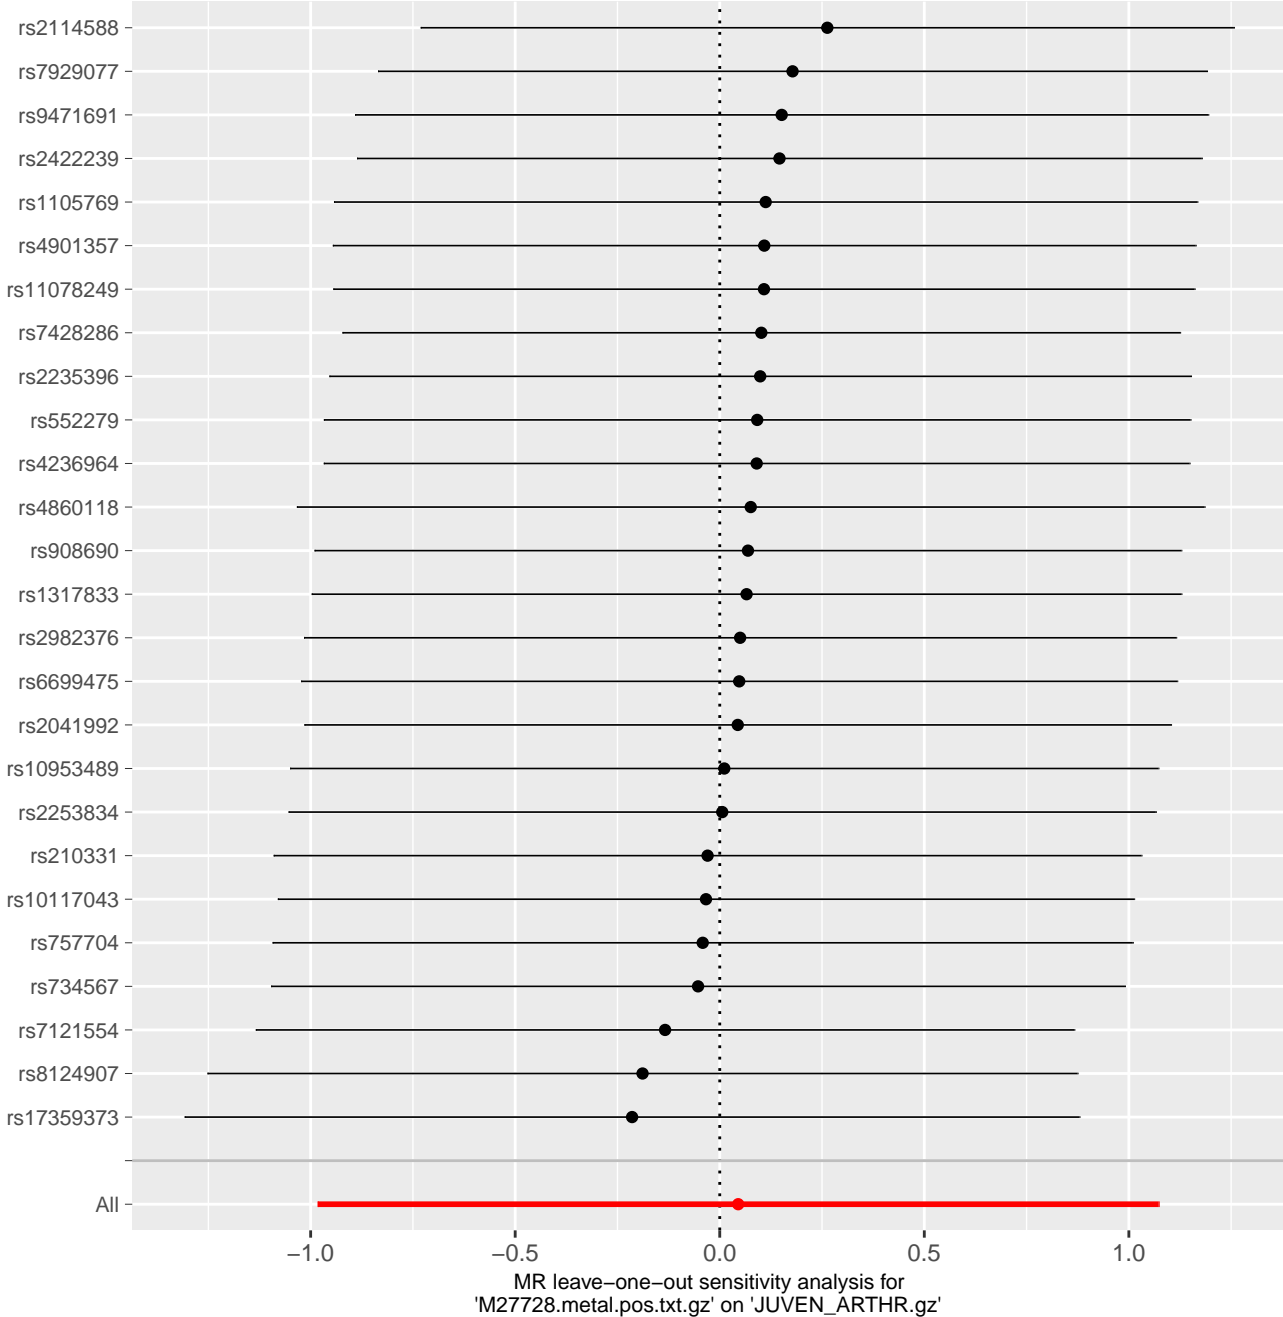

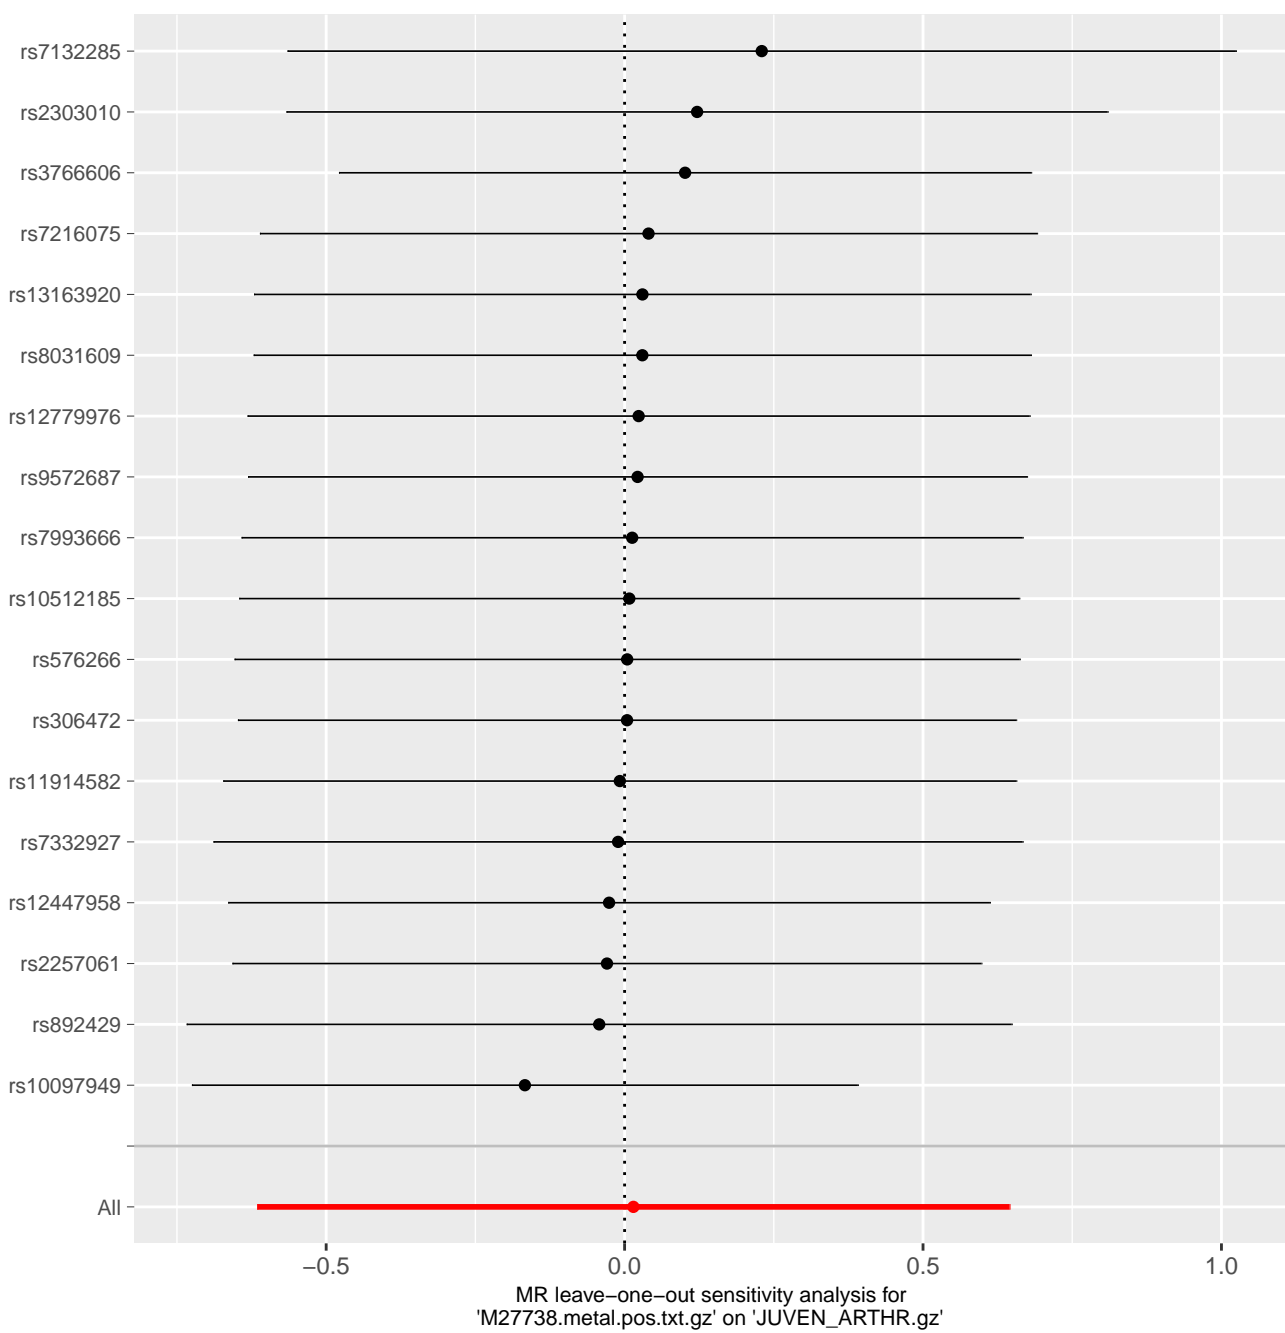

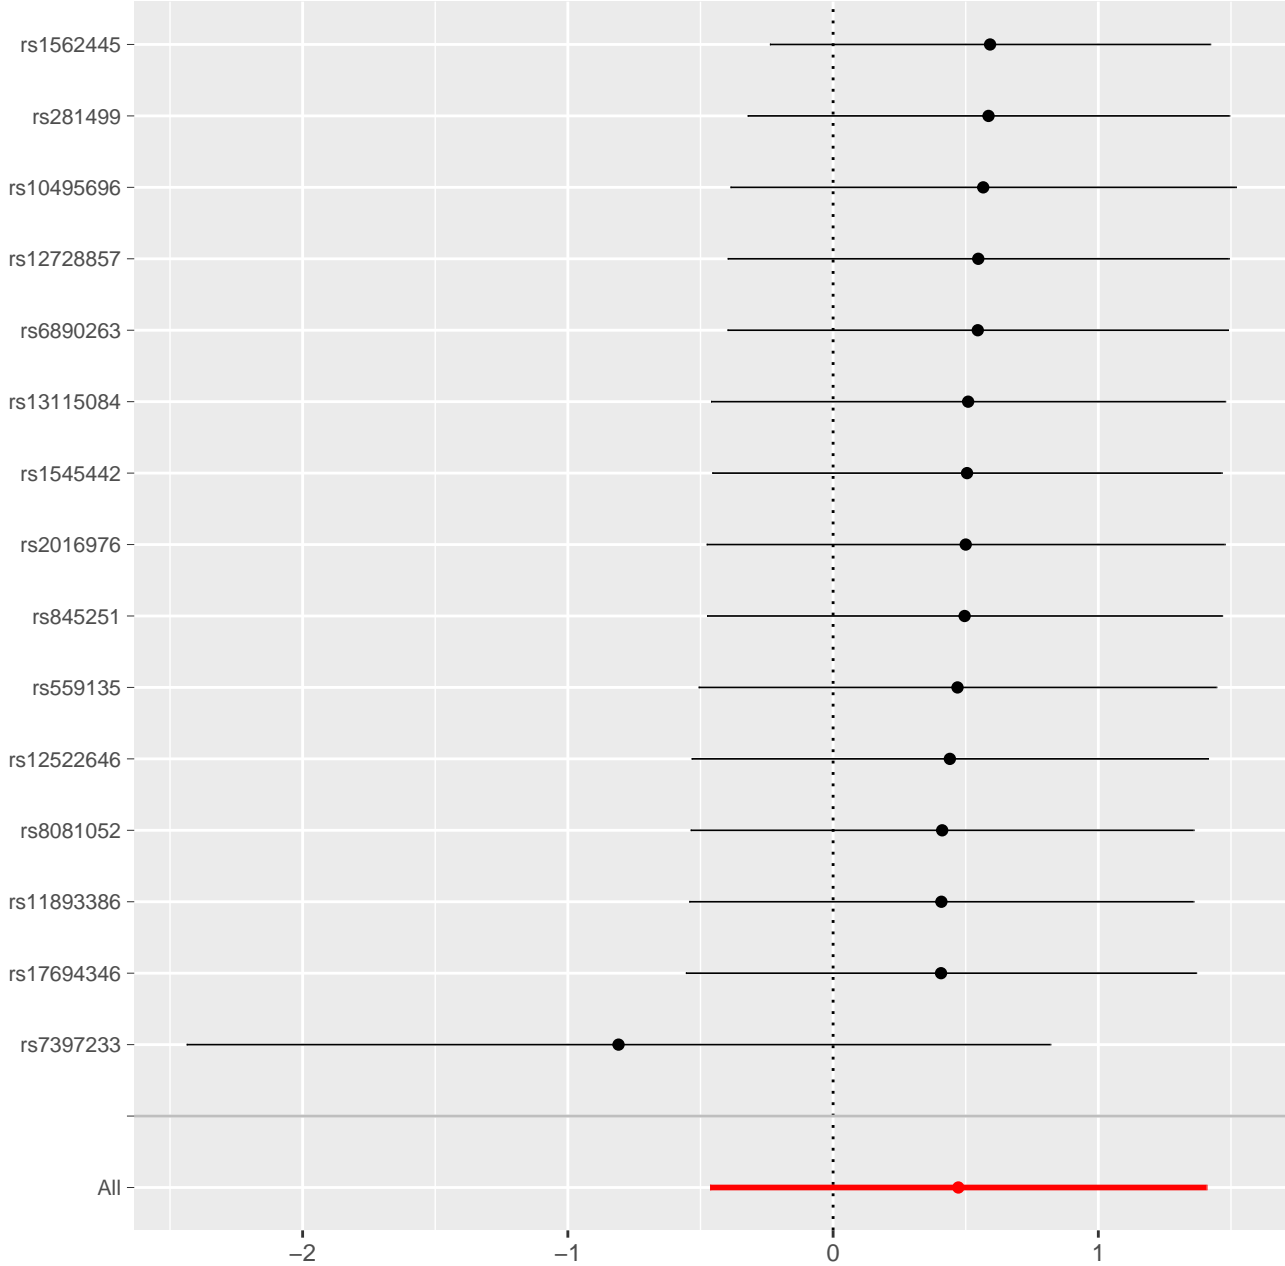

MR leave-one-out sensitivity analysis for 'M30805.metal.pos.txt.gz' on 'JUVEN\_ARTHR.gz'

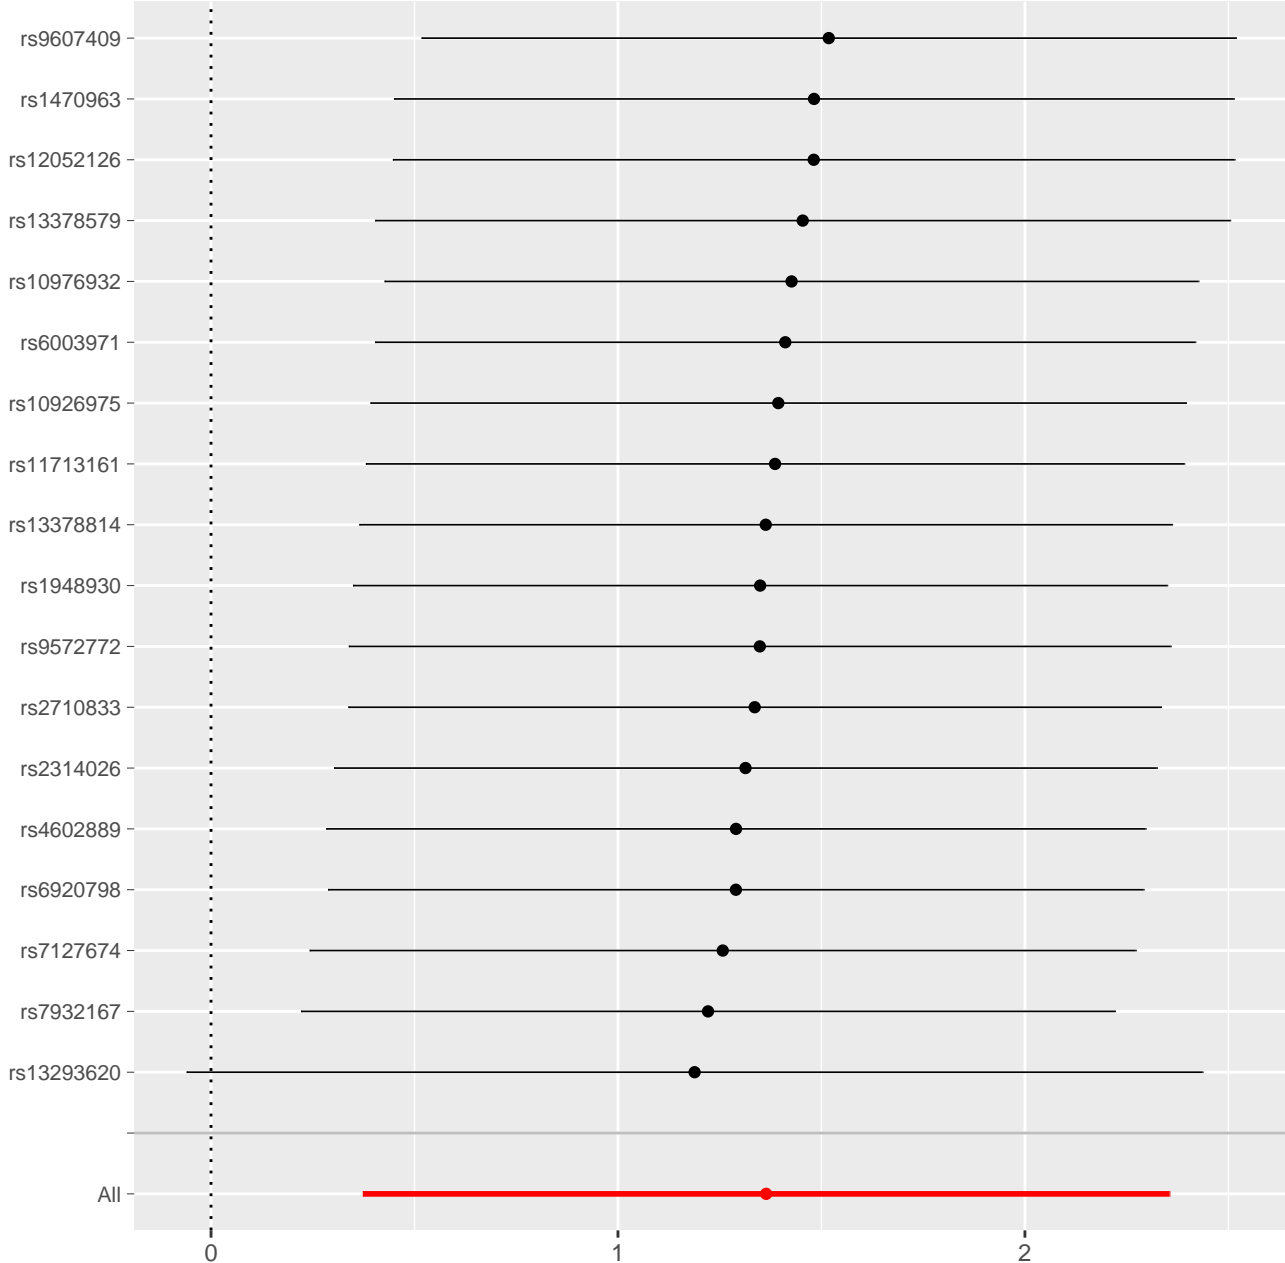

MR leave-one-out sensitivity analysis for 'M31453.metal.pos.txt.gz' on 'JUVEN\_ARTHR.gz'



rs13398058

rs241323

rs4677337

All

-1

0

MR leave-one-out sensitivity analysis for  
'M31522.metal.pos.txt.gz' on 'JUVEN\_ARTHR.gz'

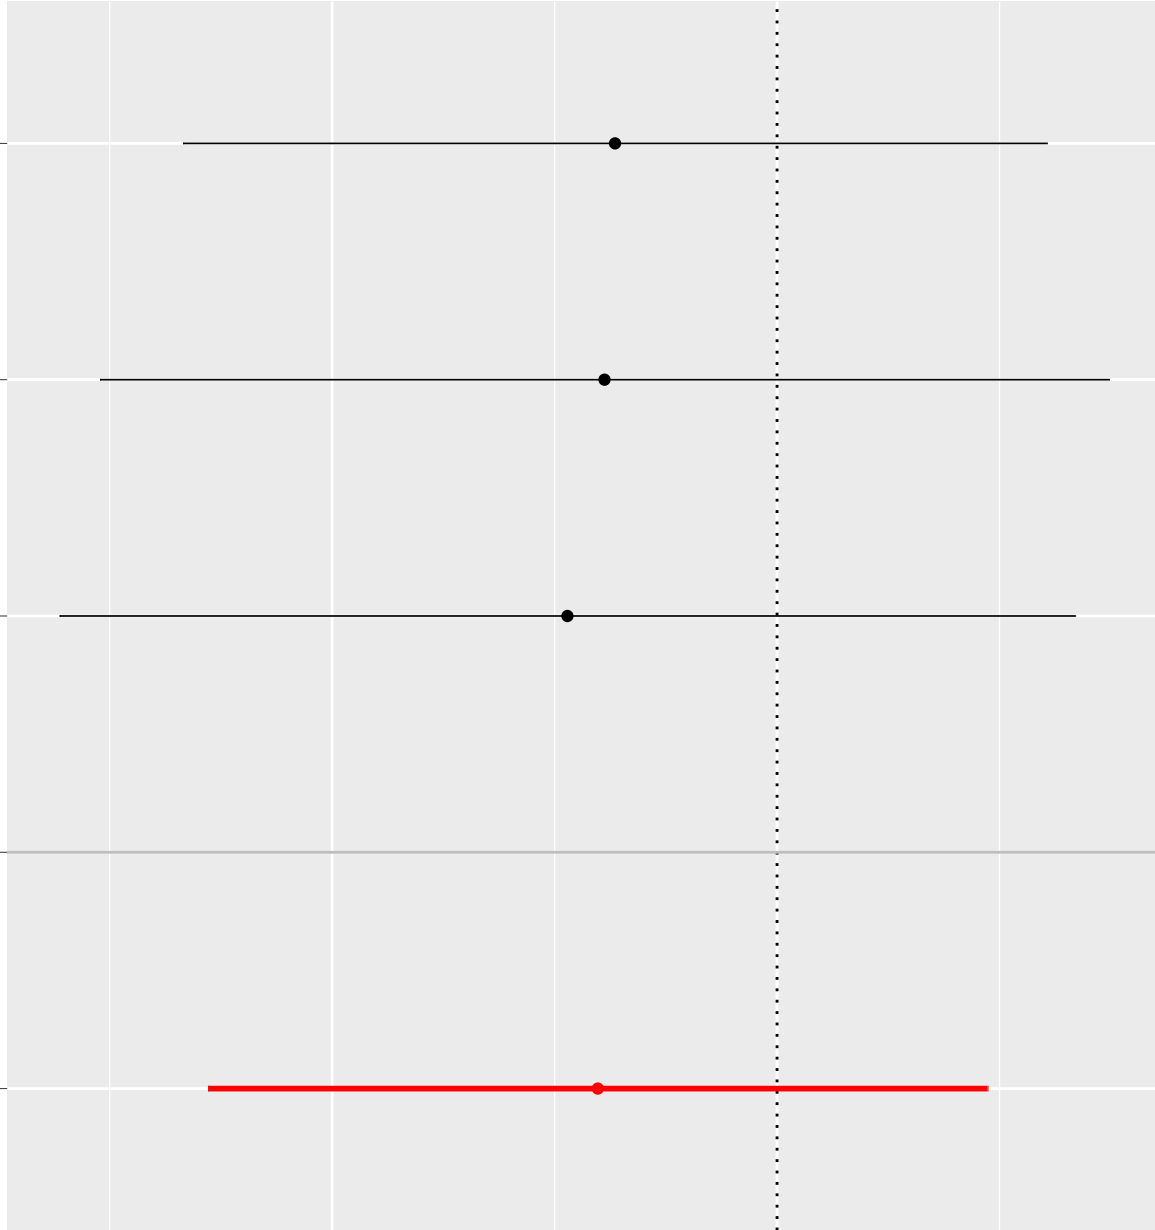

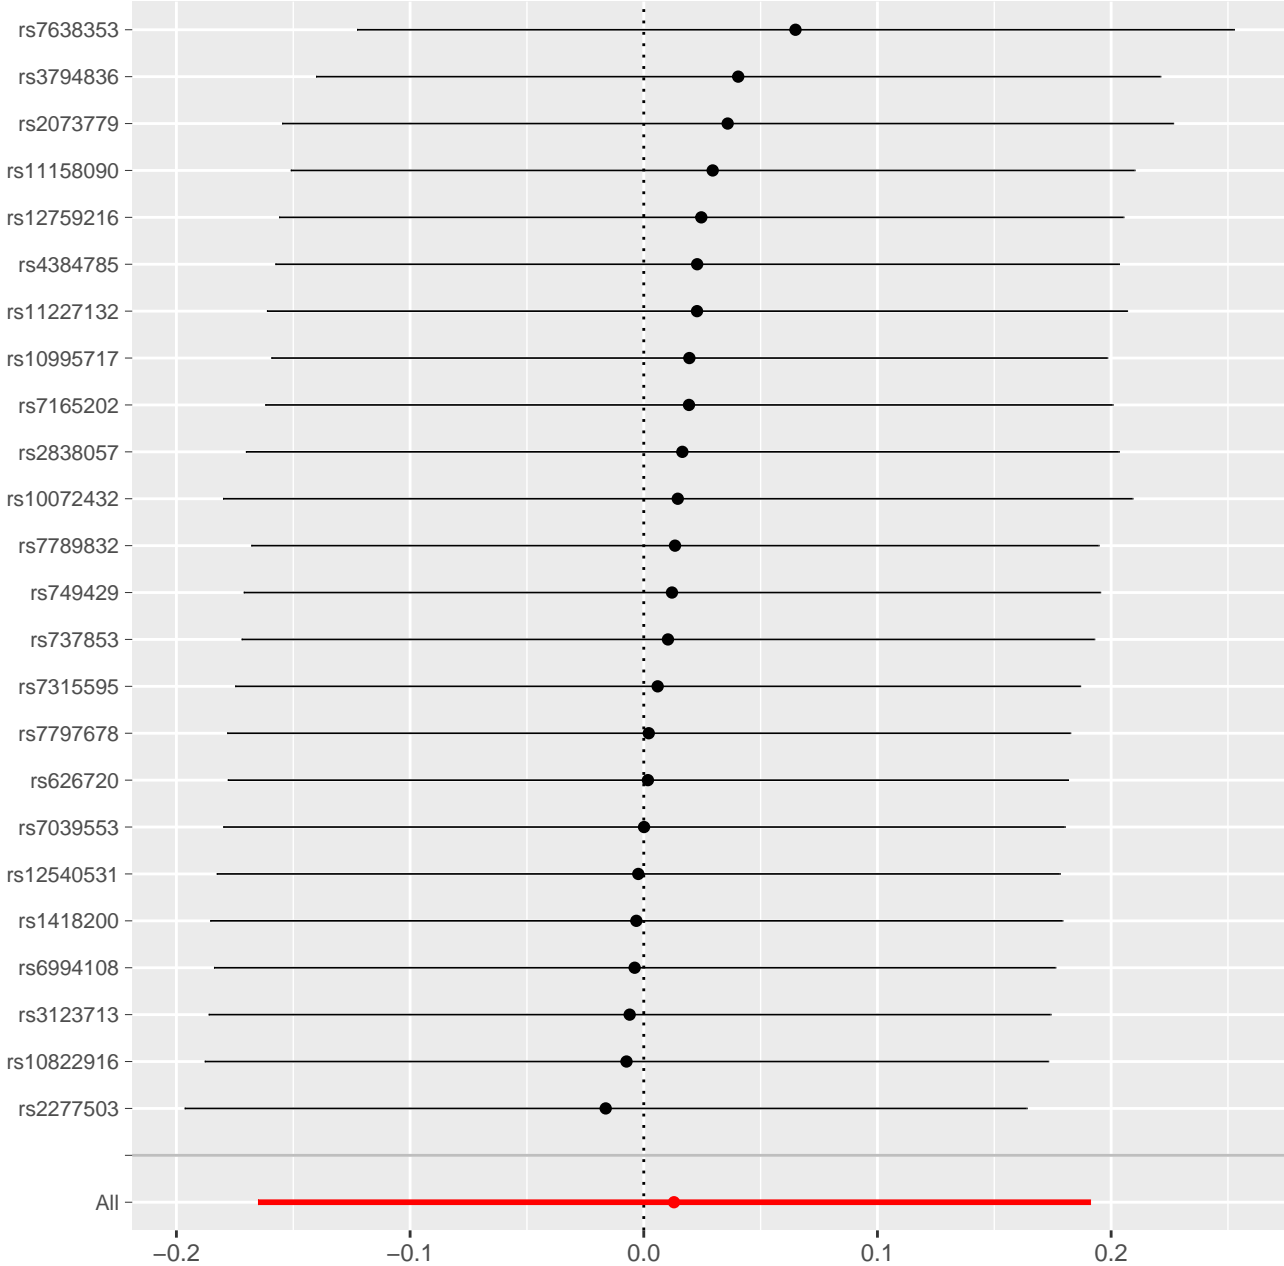

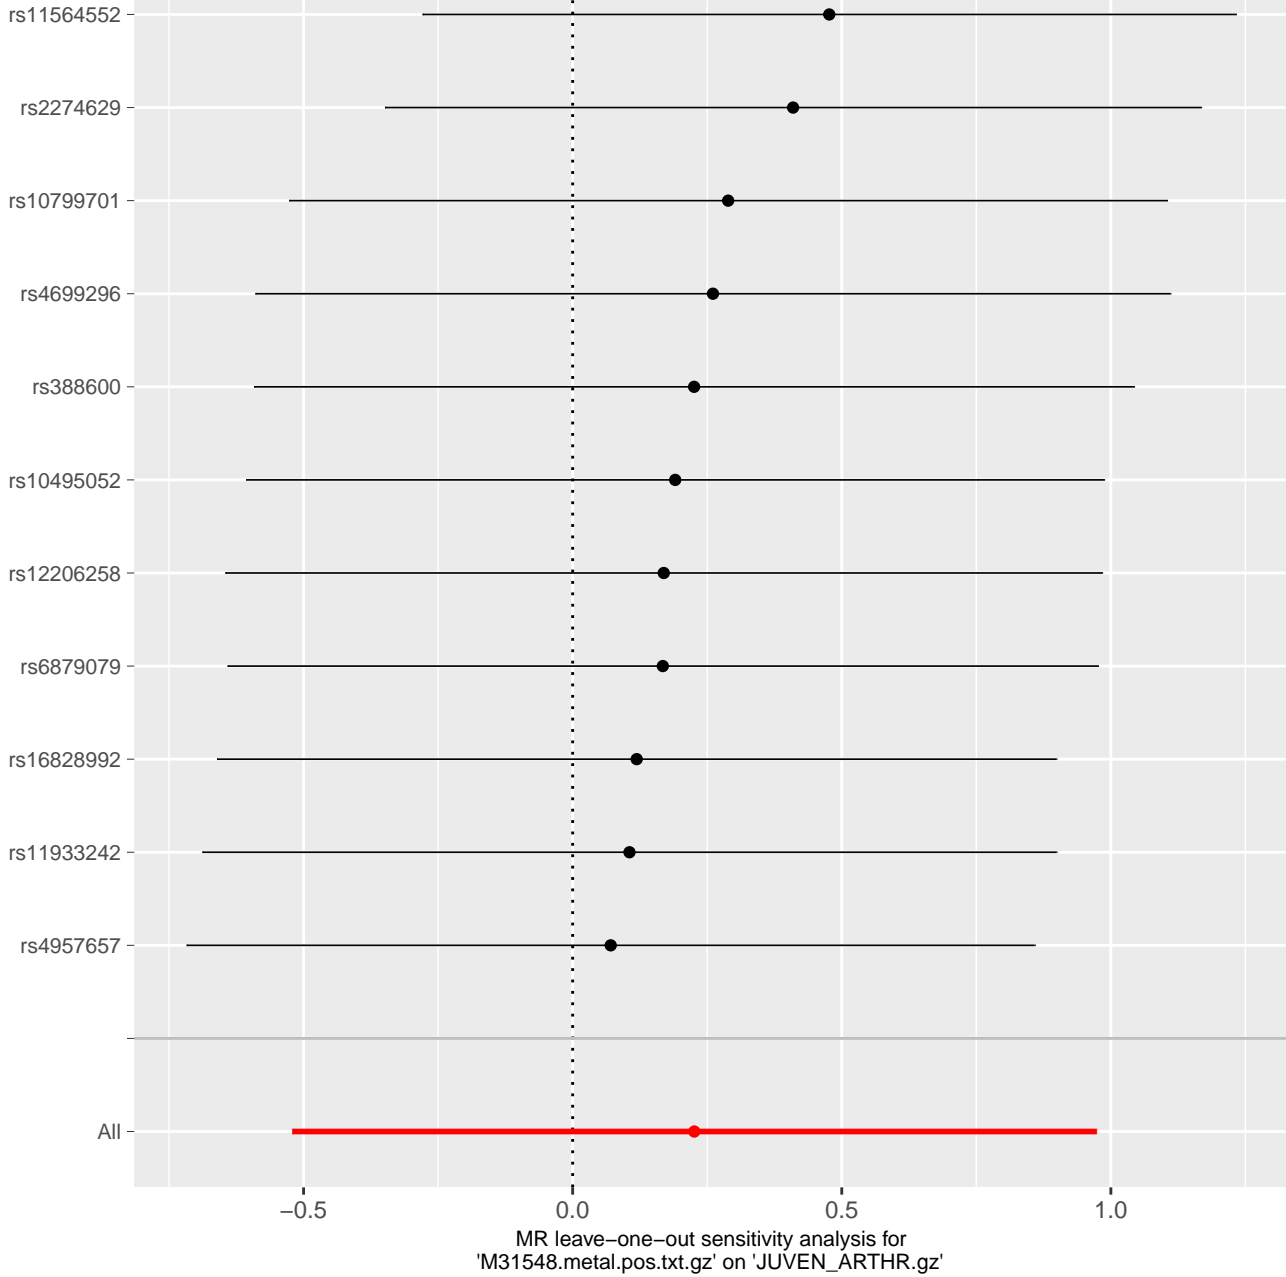

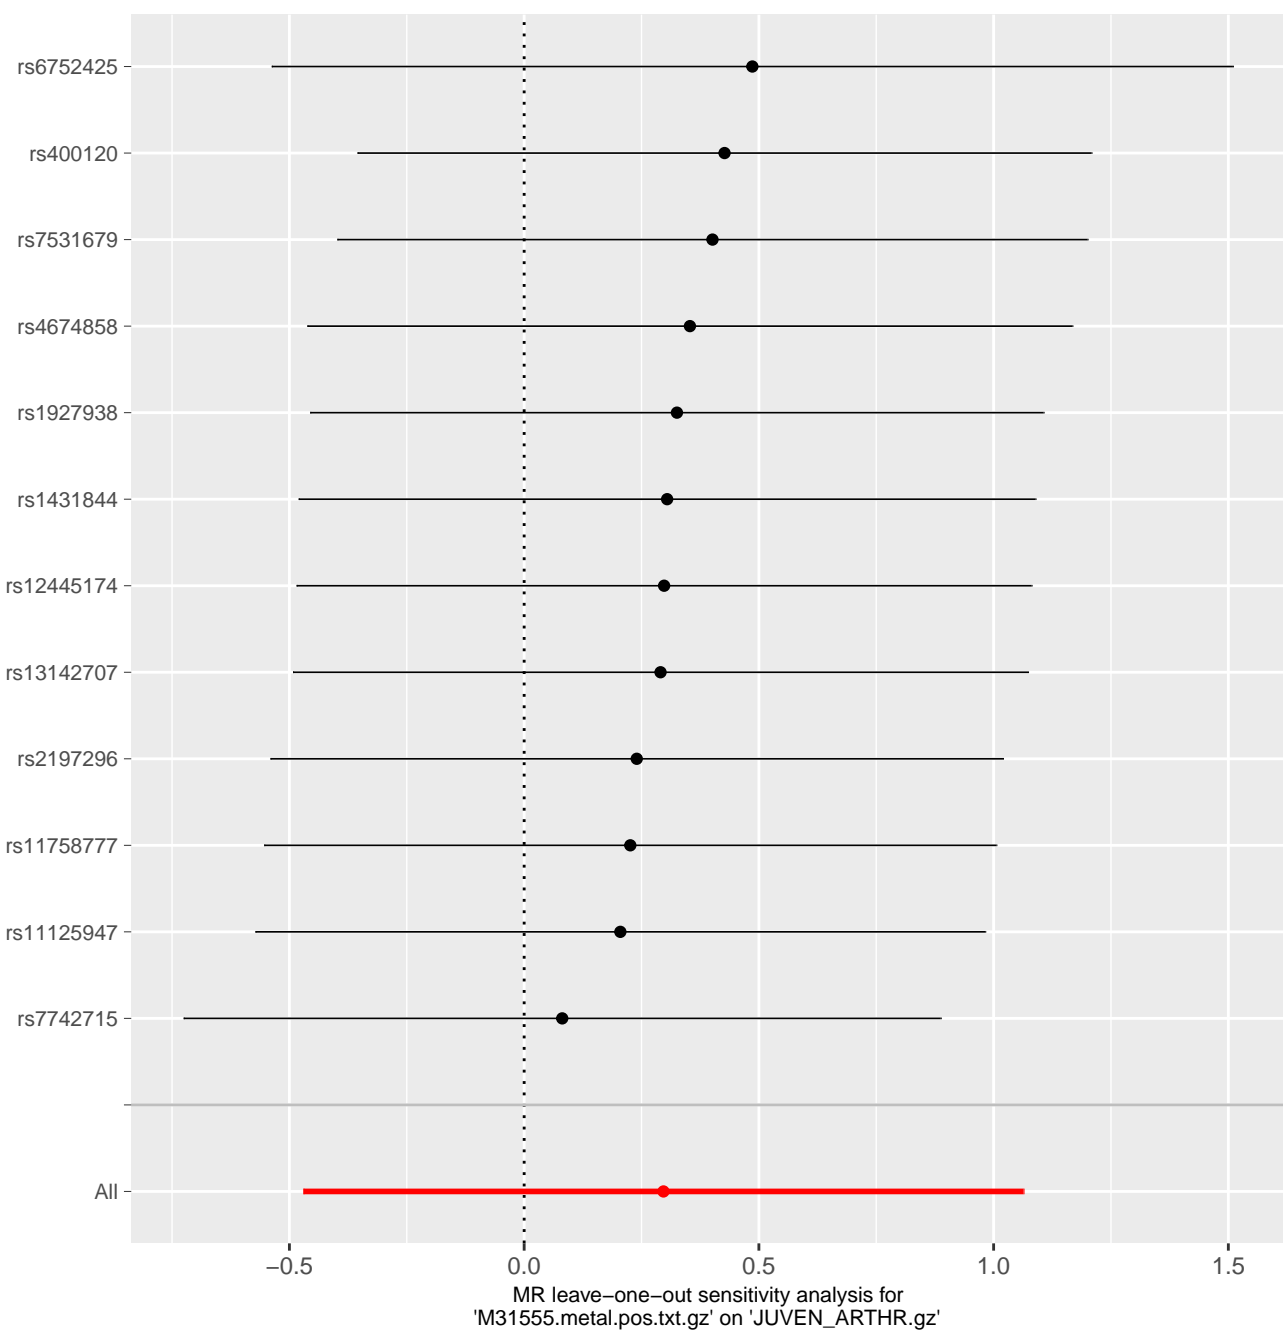

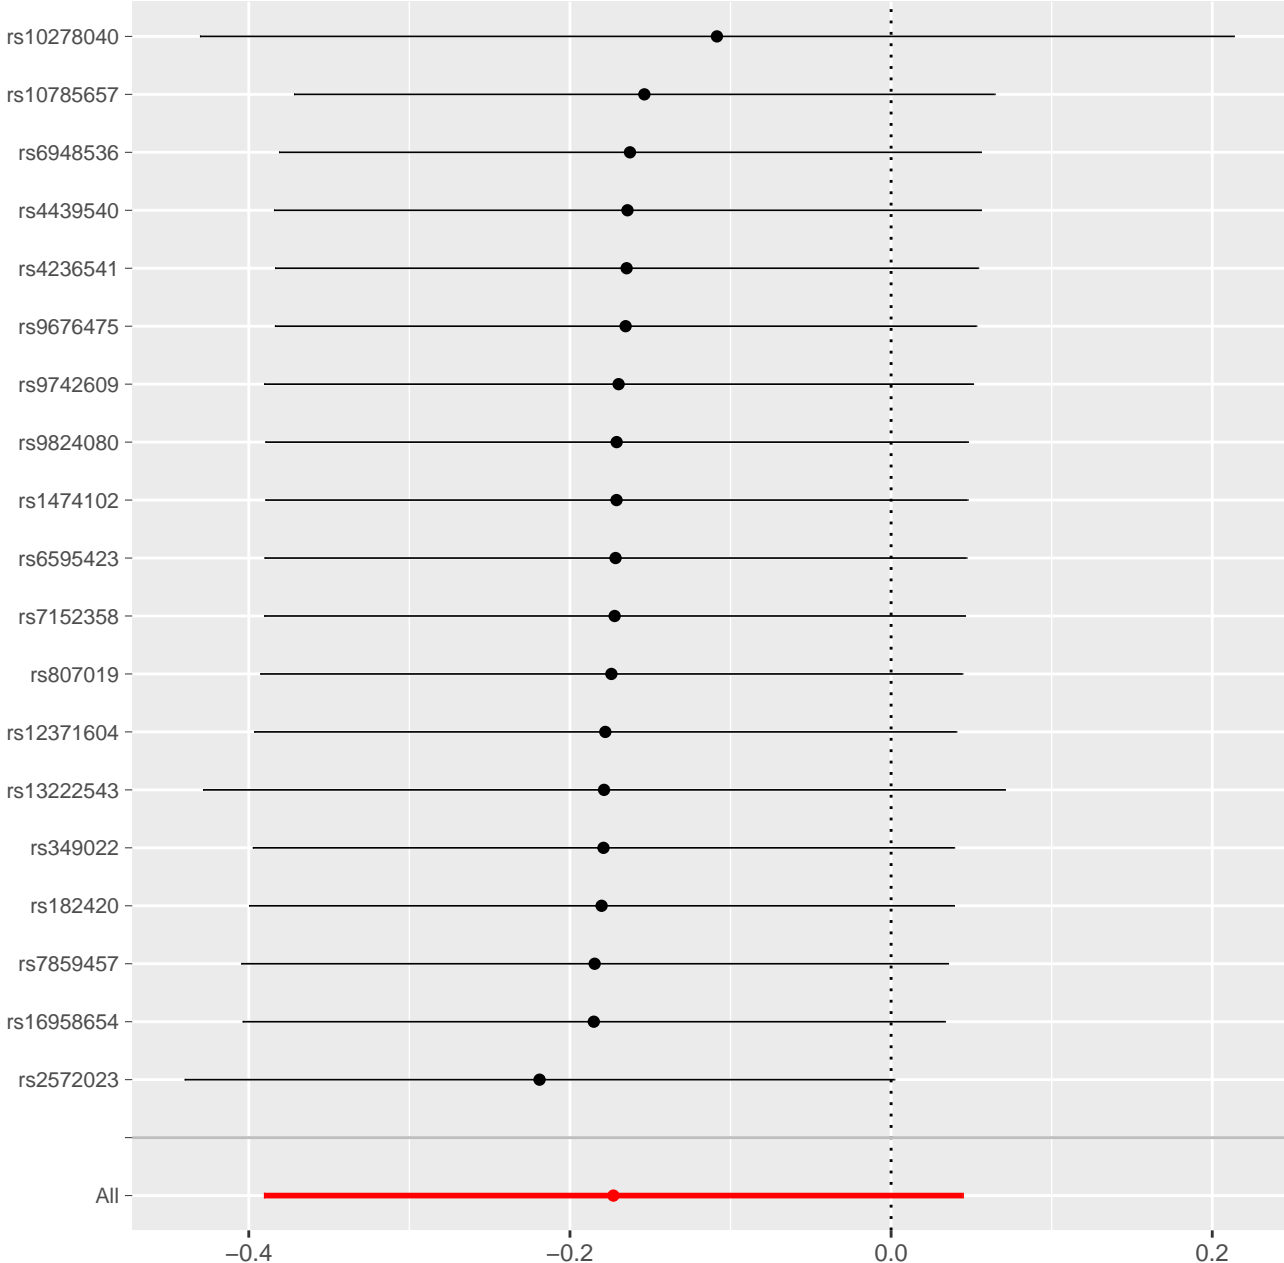

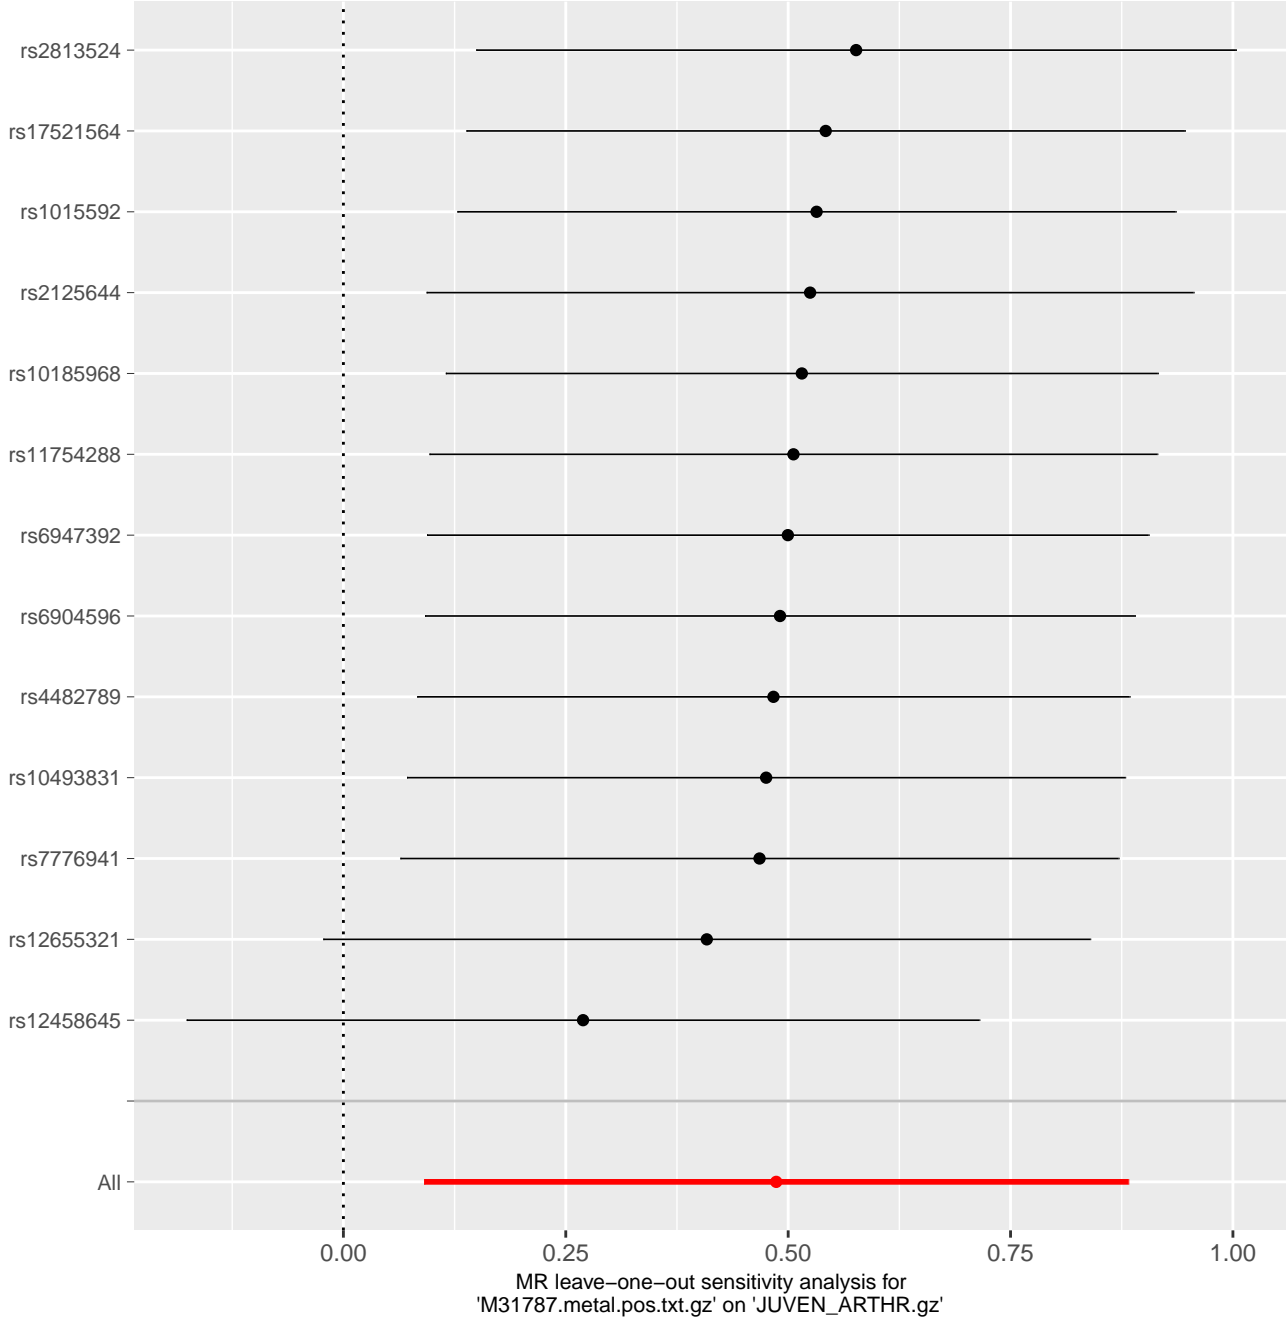

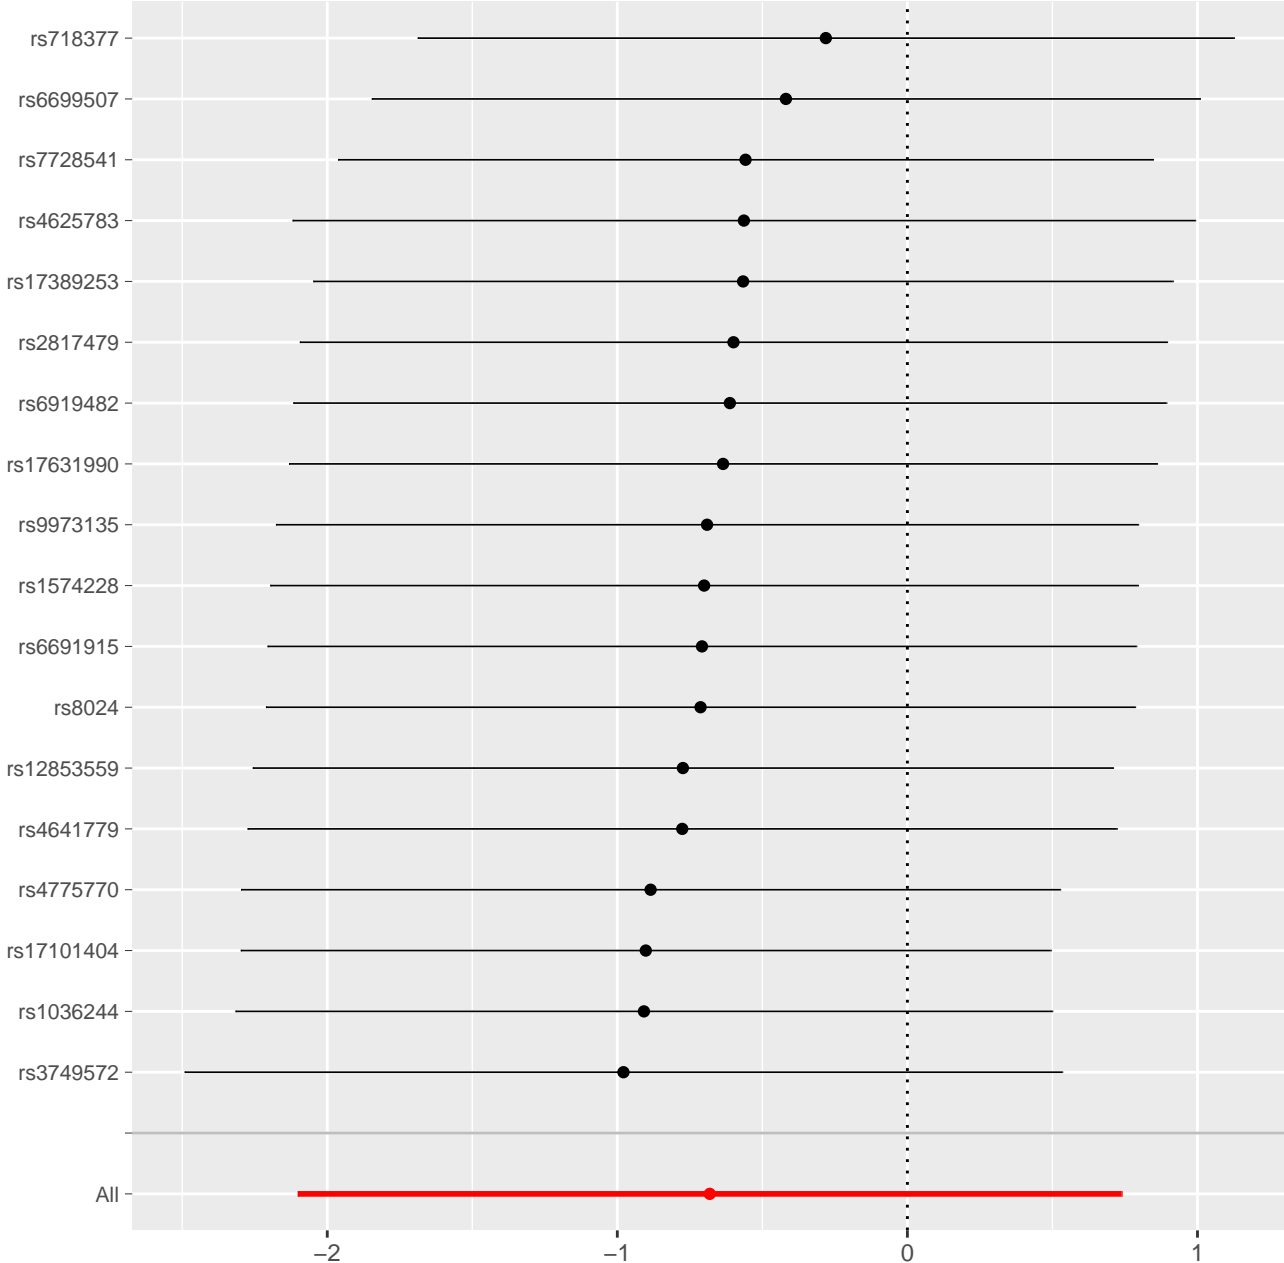

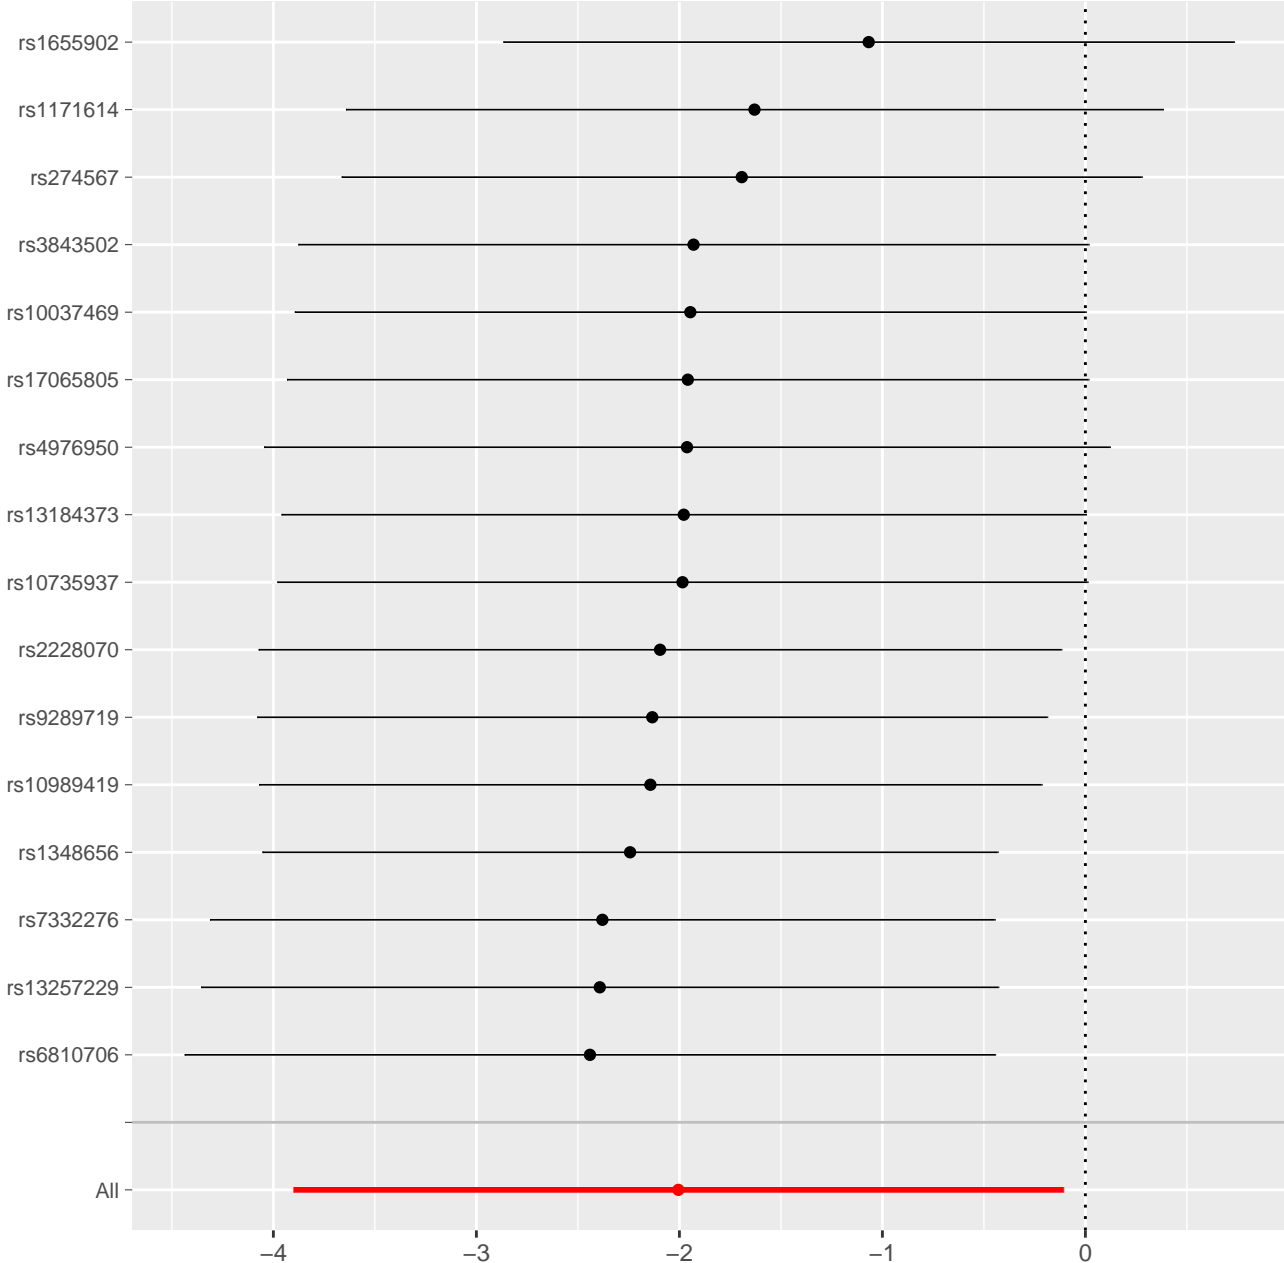

MR leave-one-out sensitivity analysis for 'M32198.metal.pos.txt.gz' on 'JUVEN\_ARTHR.gz'



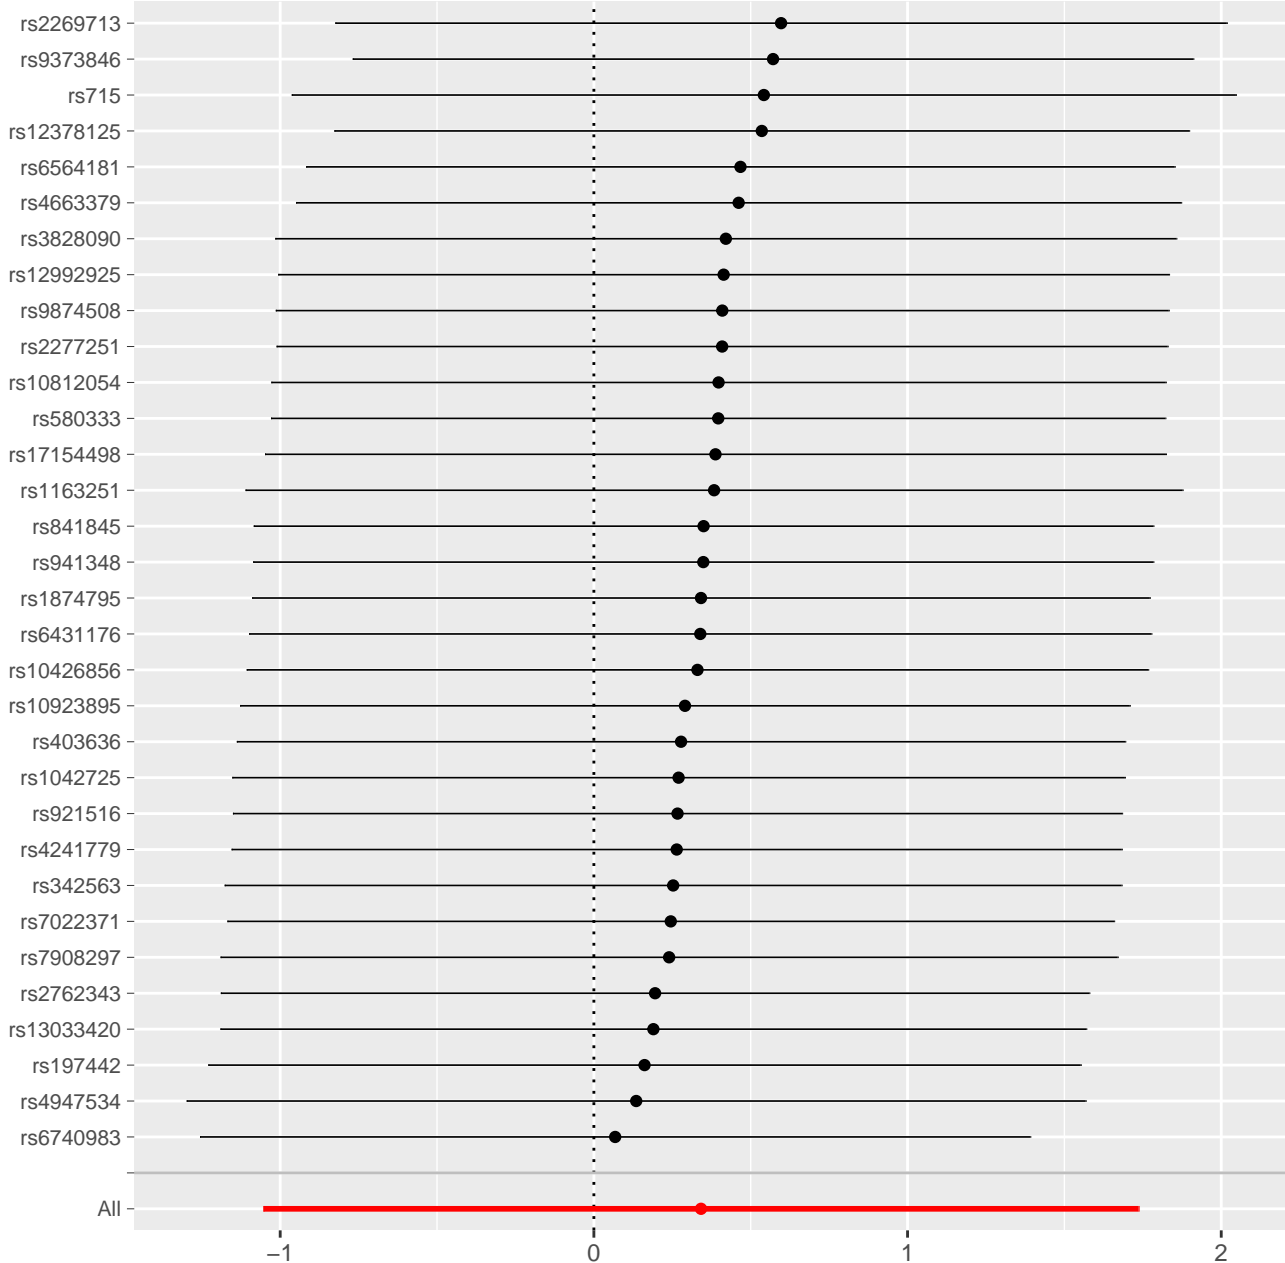

MR leave-one-out sensitivity analysis for 'M32315.metal.pos.txt.gz' on 'JUVEN\_ARTHR.gz'

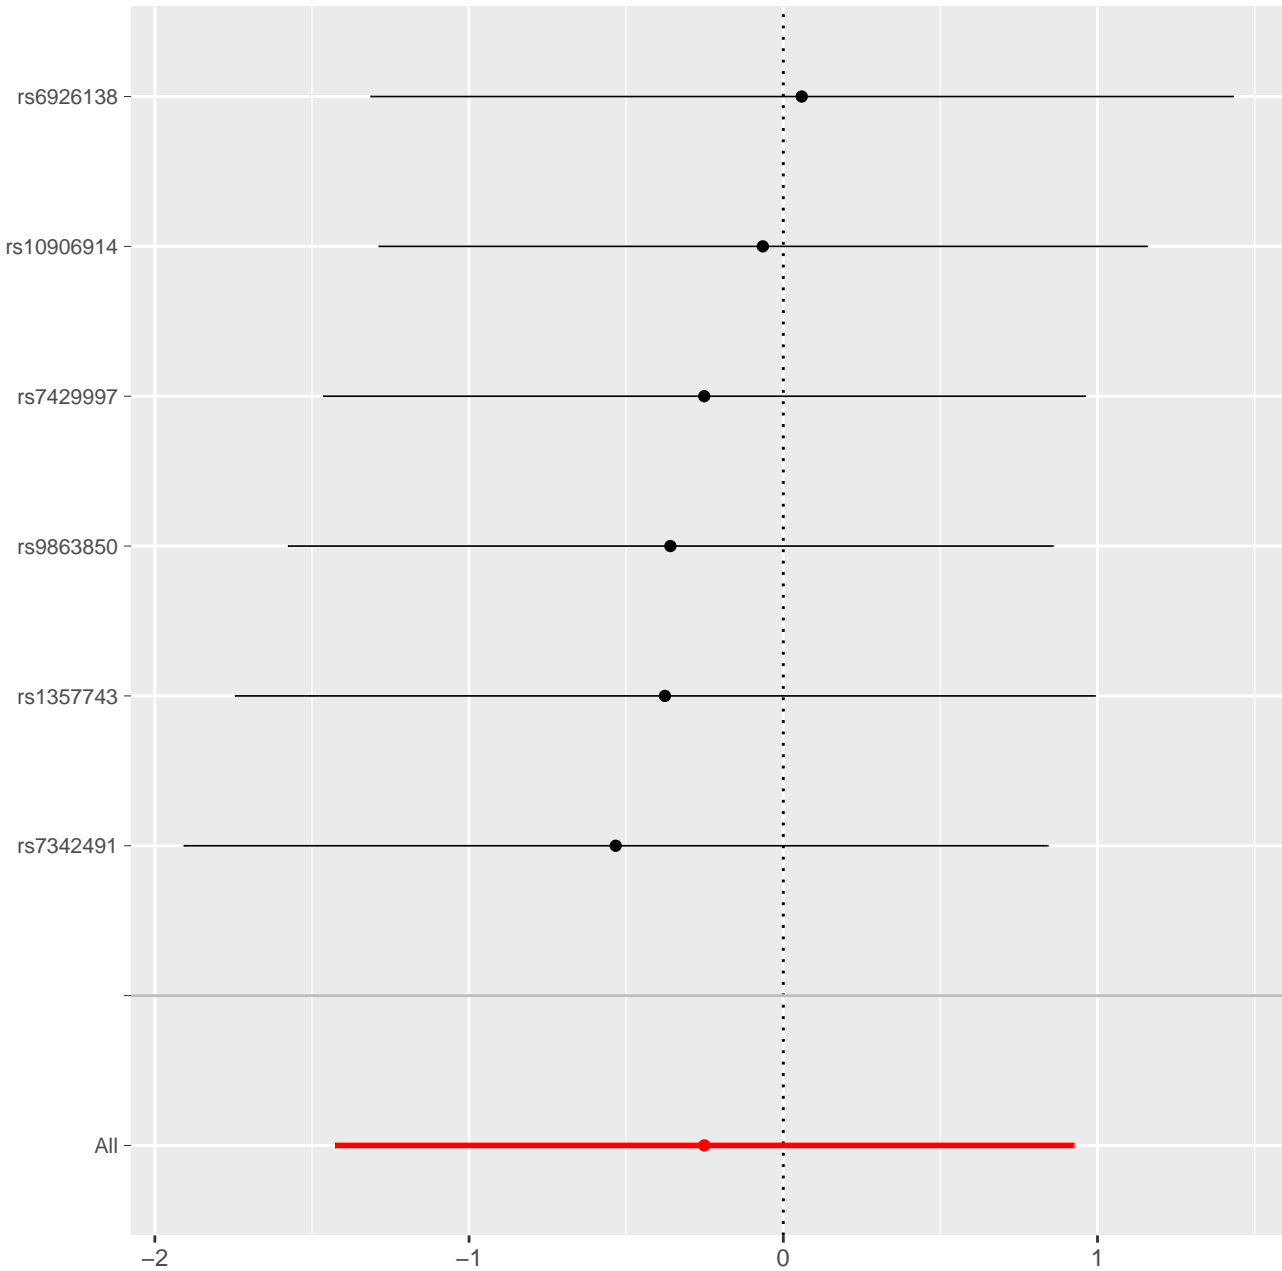

MR leave-one-out sensitivity analysis for 'M32319.metal.pos.txt.gz' on 'JUVEN\_ARTHR.gz'

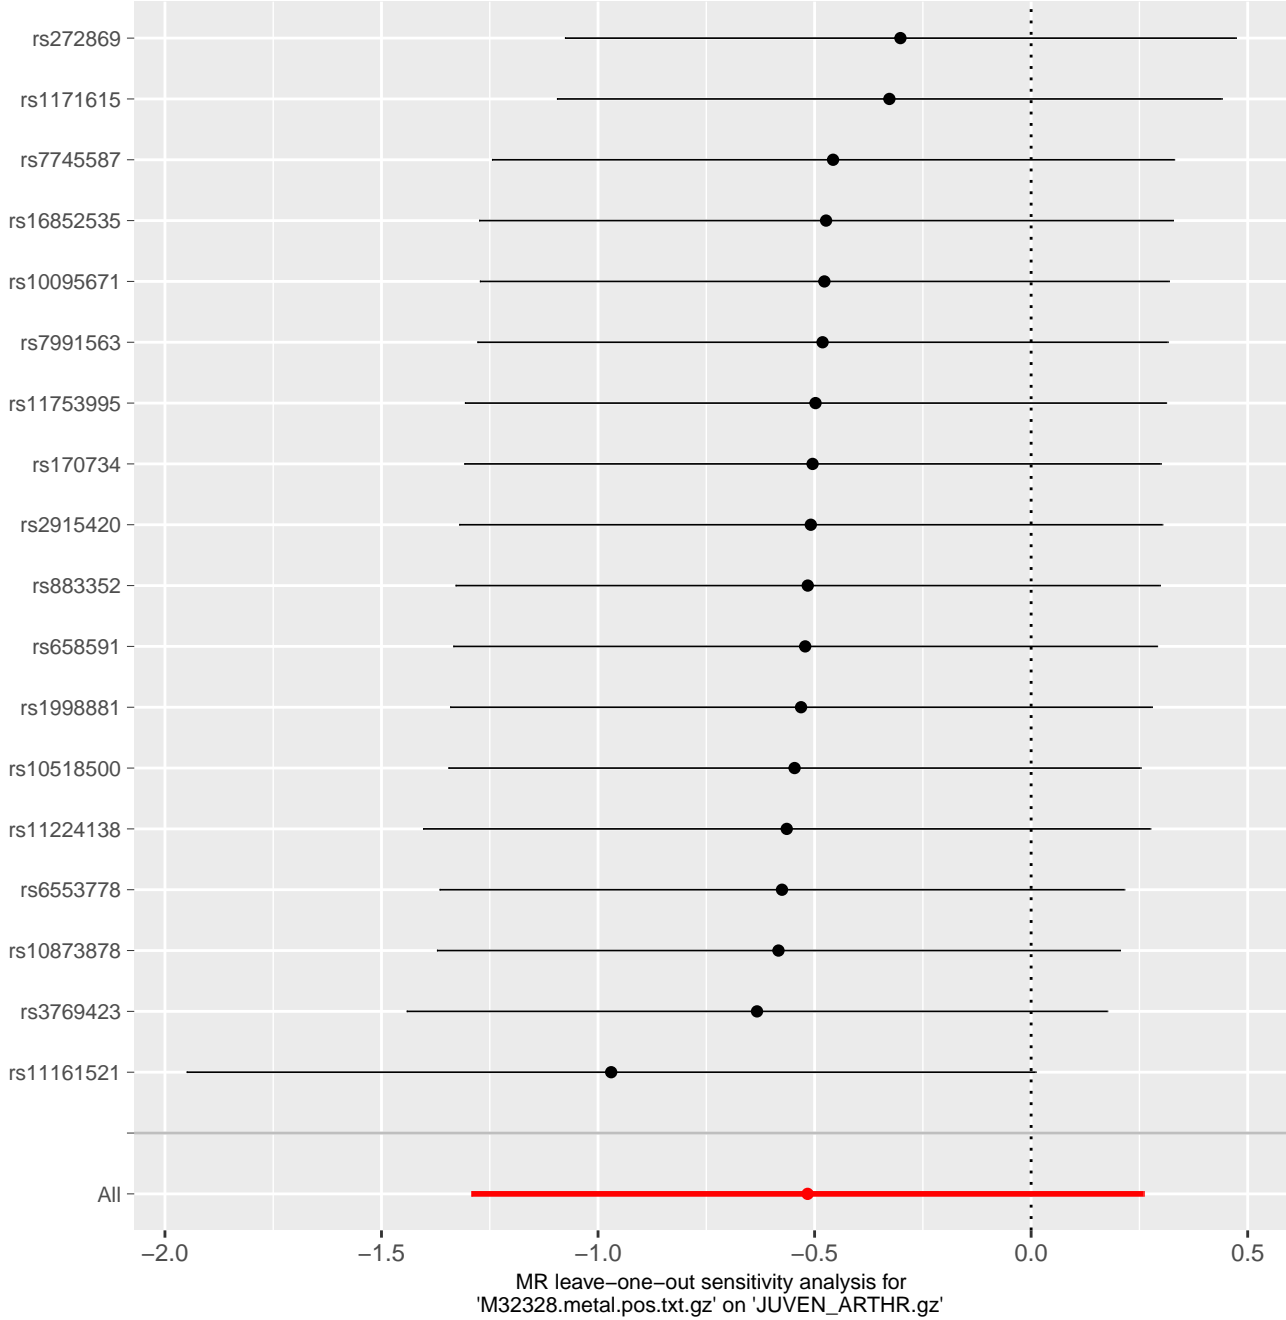

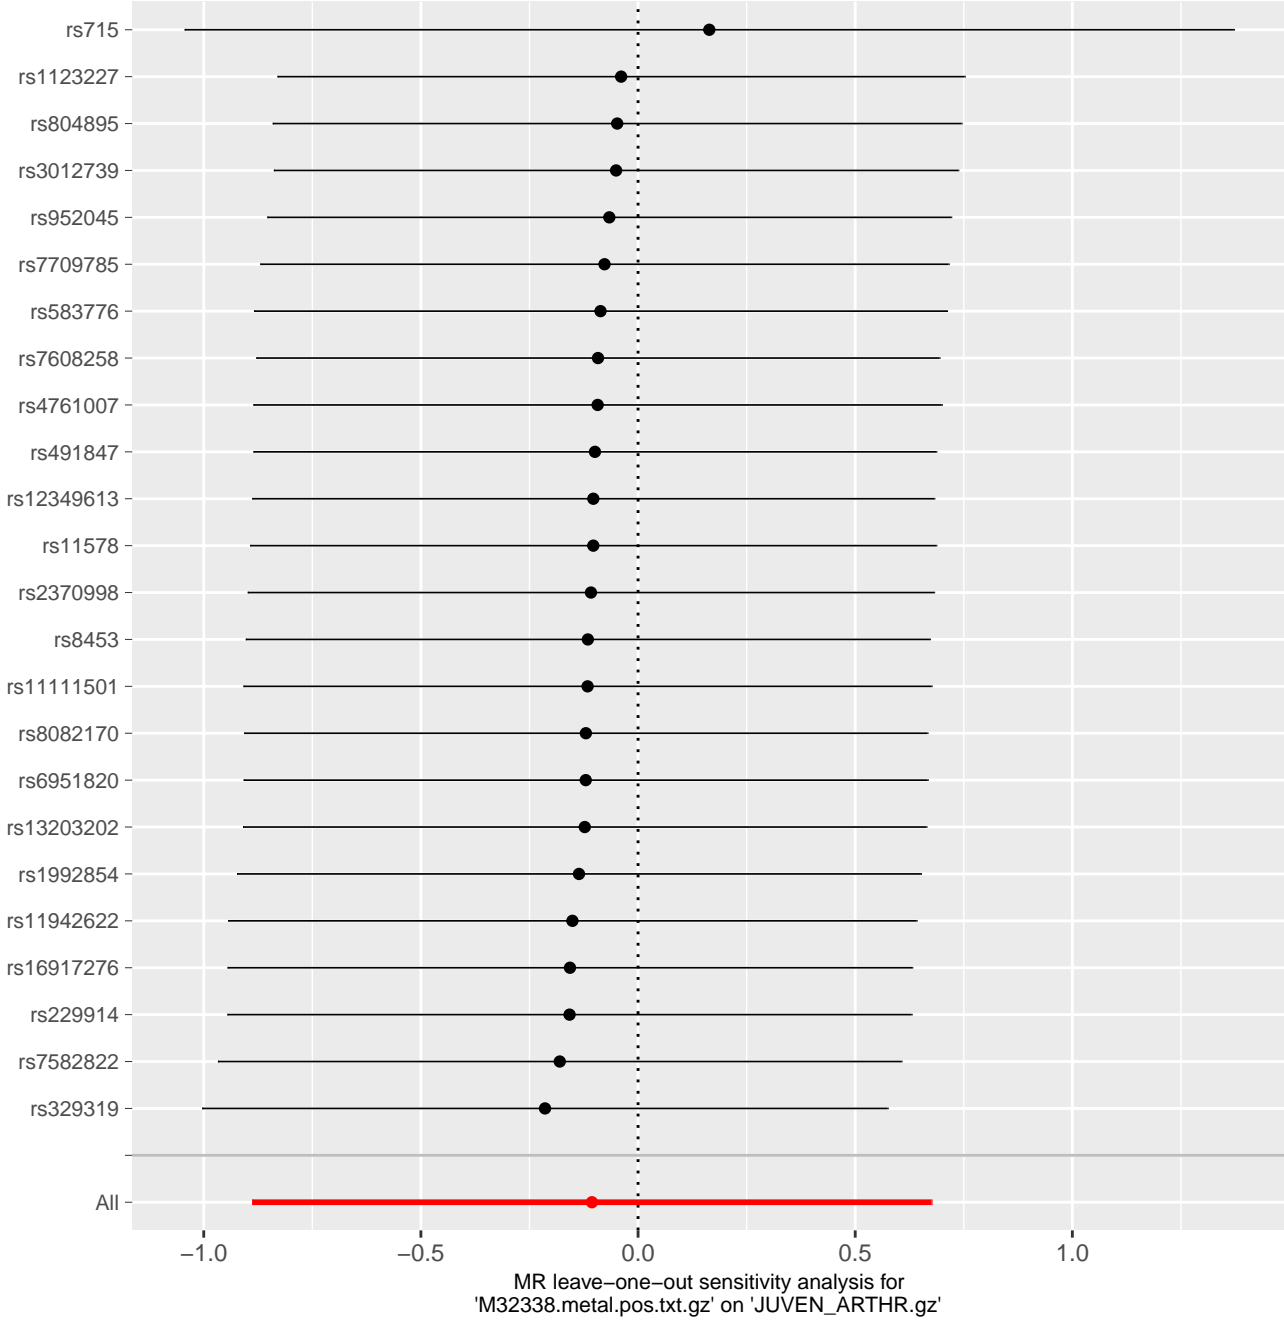

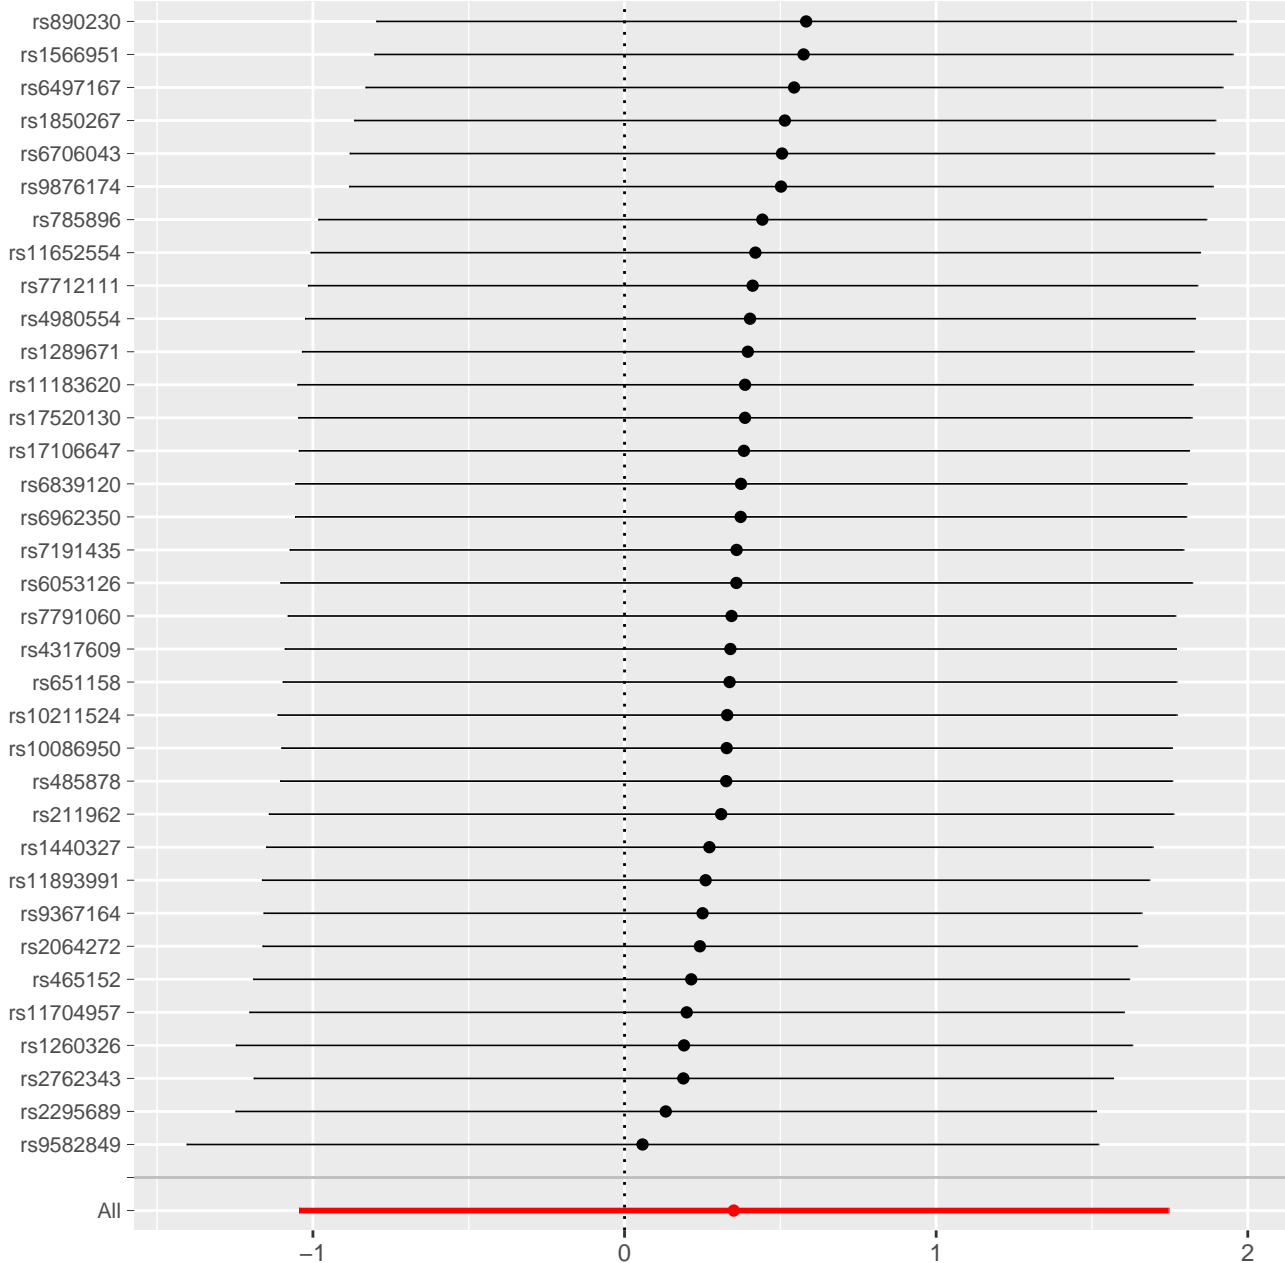

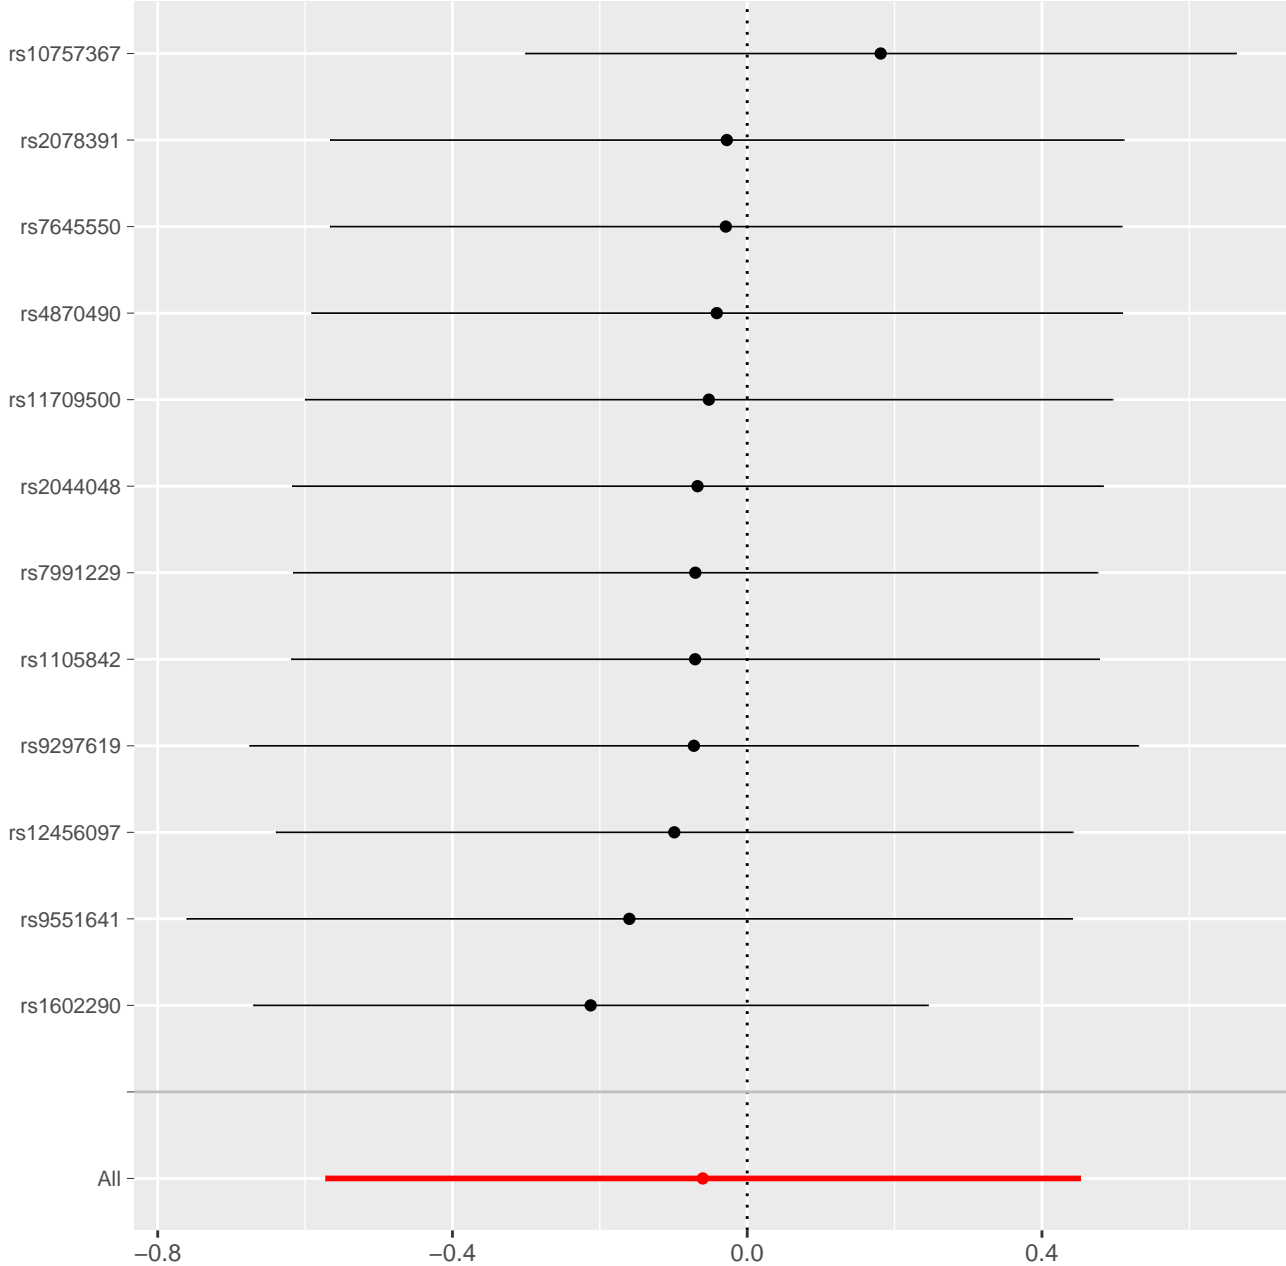

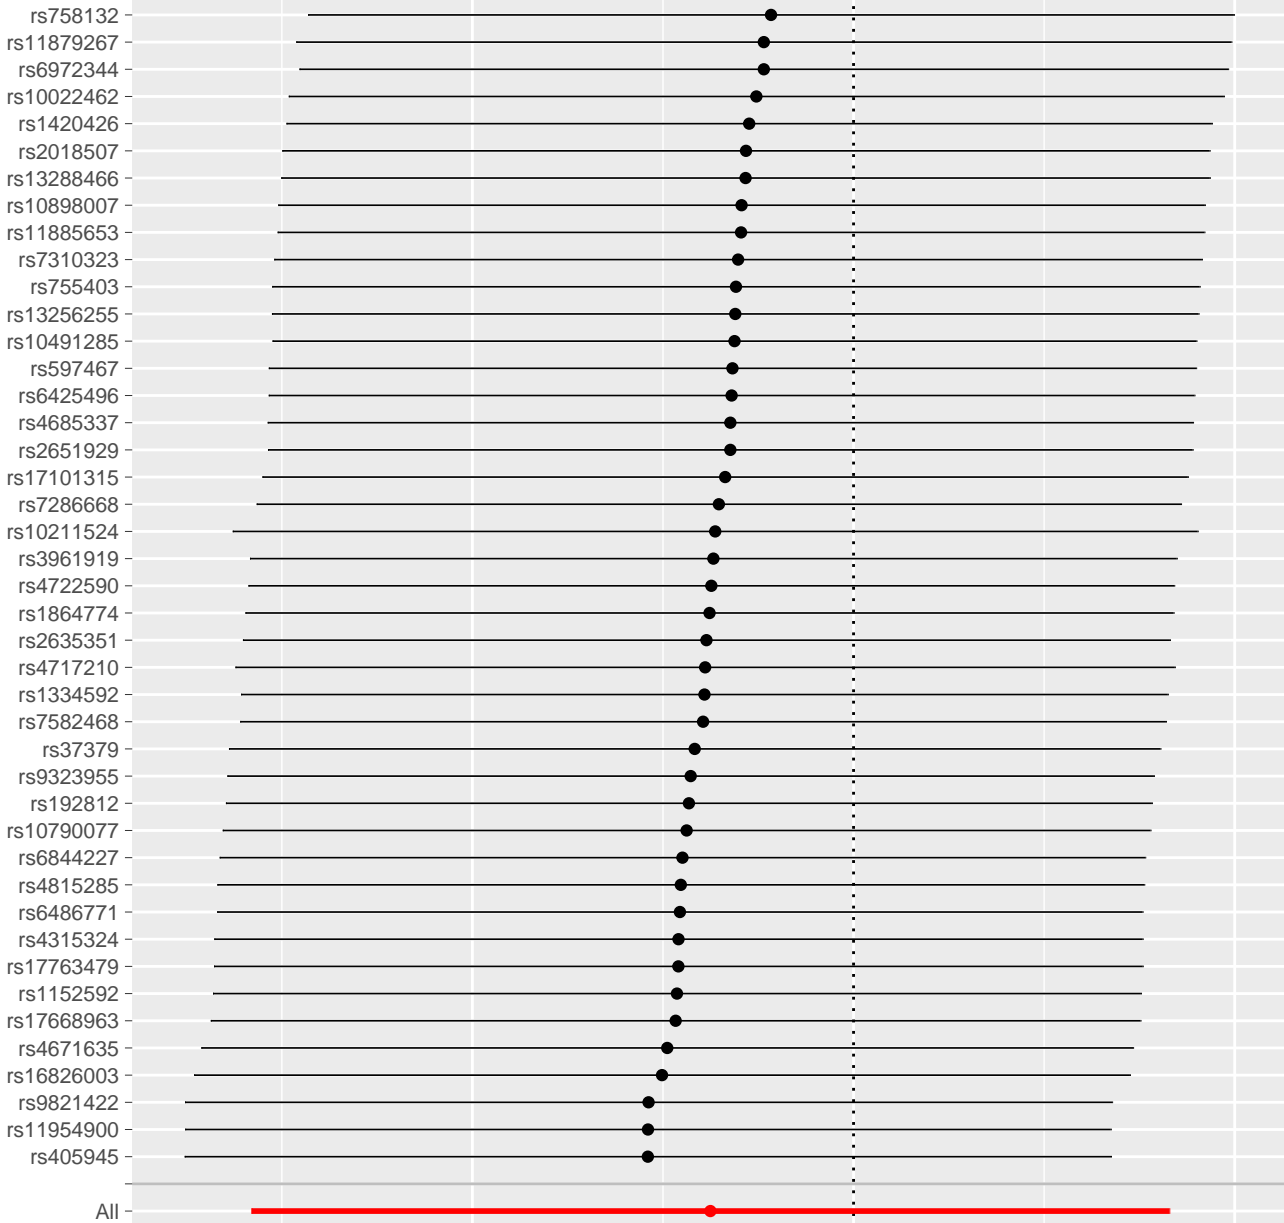

MR leave-one-out sensitivity analysis for 'M32348.metal.pos.txt.gz' on 'JUVEN\_ARTHR.gz'

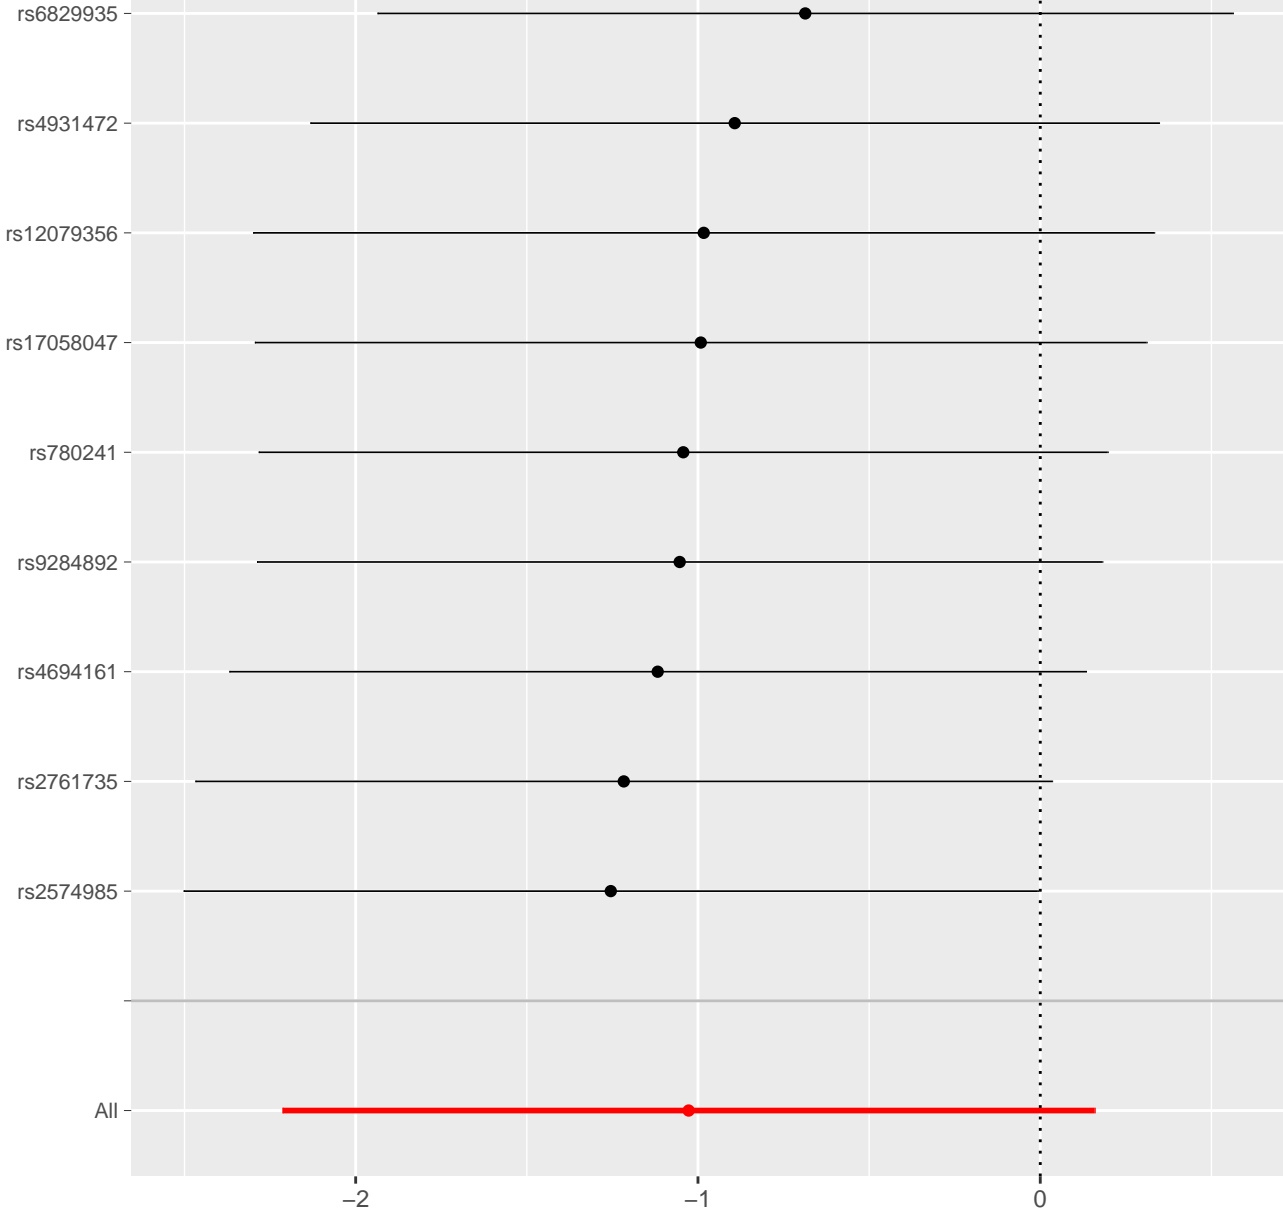



rs16846919

rs11126153

rs7499321

rs1539549

rs602609

rs1572603

All

-1

0

1

2

3

MR leave-one-out sensitivity analysis for  
'M32388.metal.pos.txt.gz' on 'JUVEN\_ARTHR.gz'

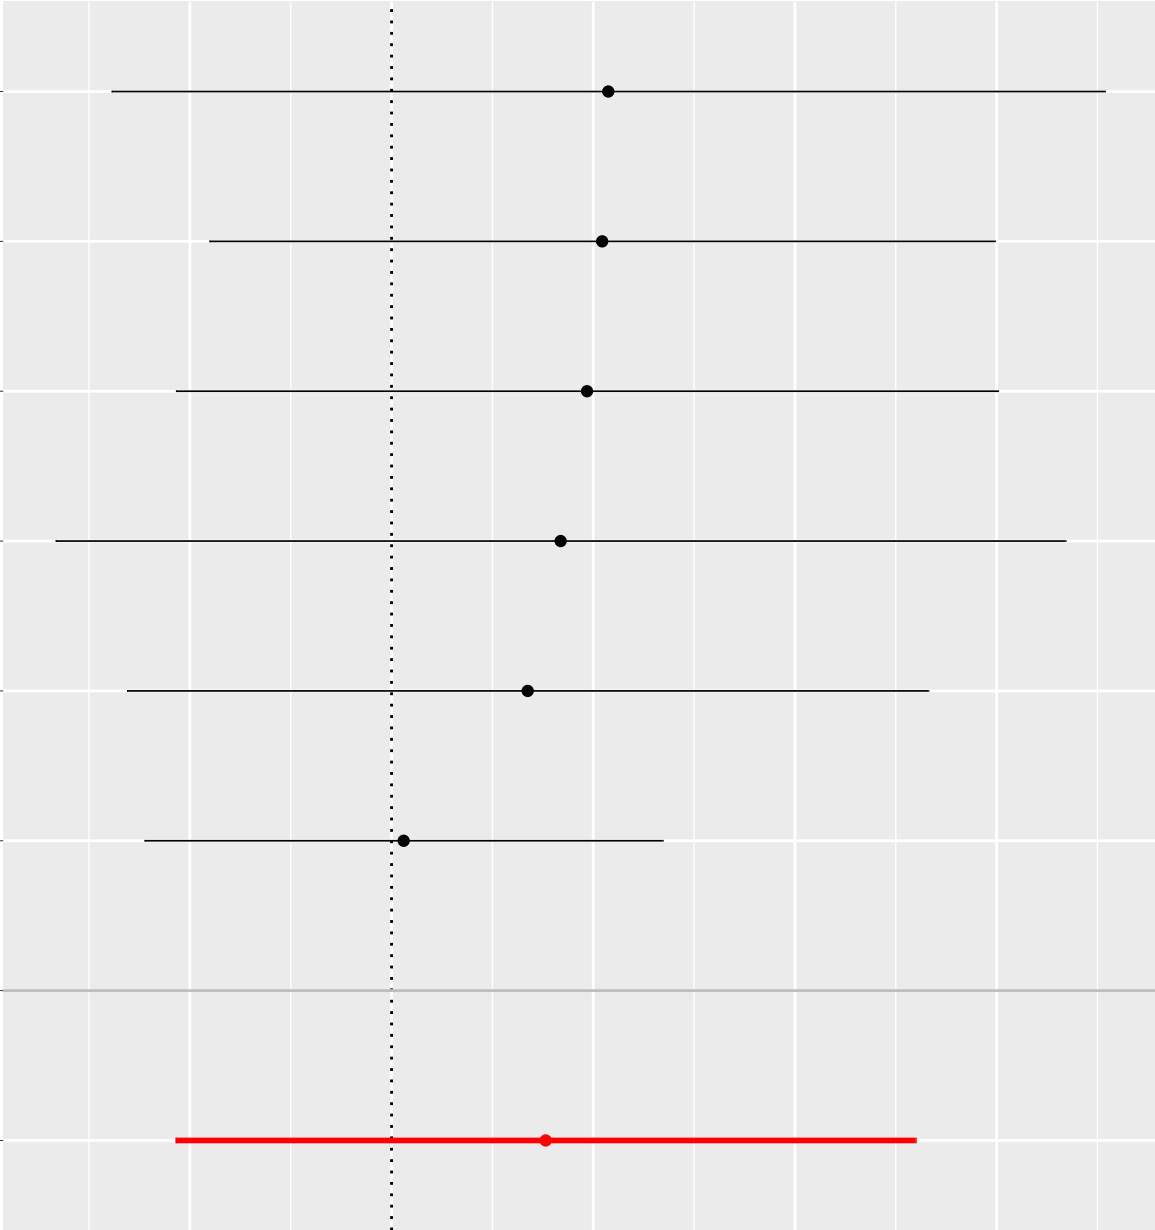

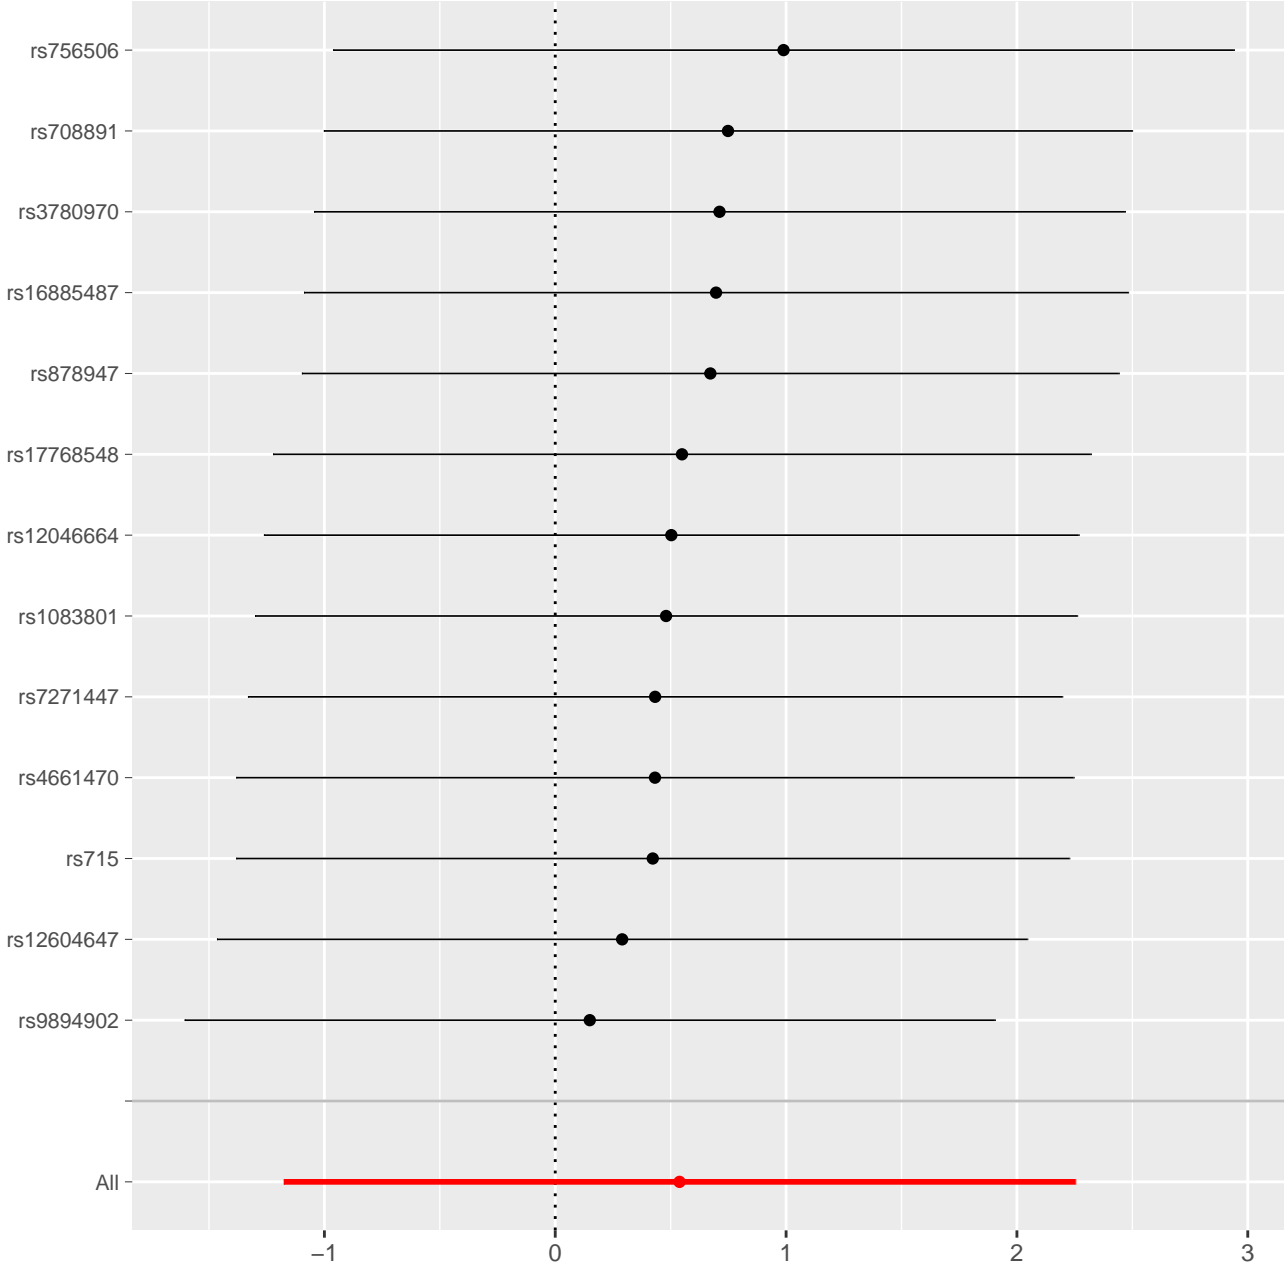

MR leave-one-out sensitivity analysis for 'M32393.metal.pos.txt.gz' on 'JUVEN\_ARTHR.gz'

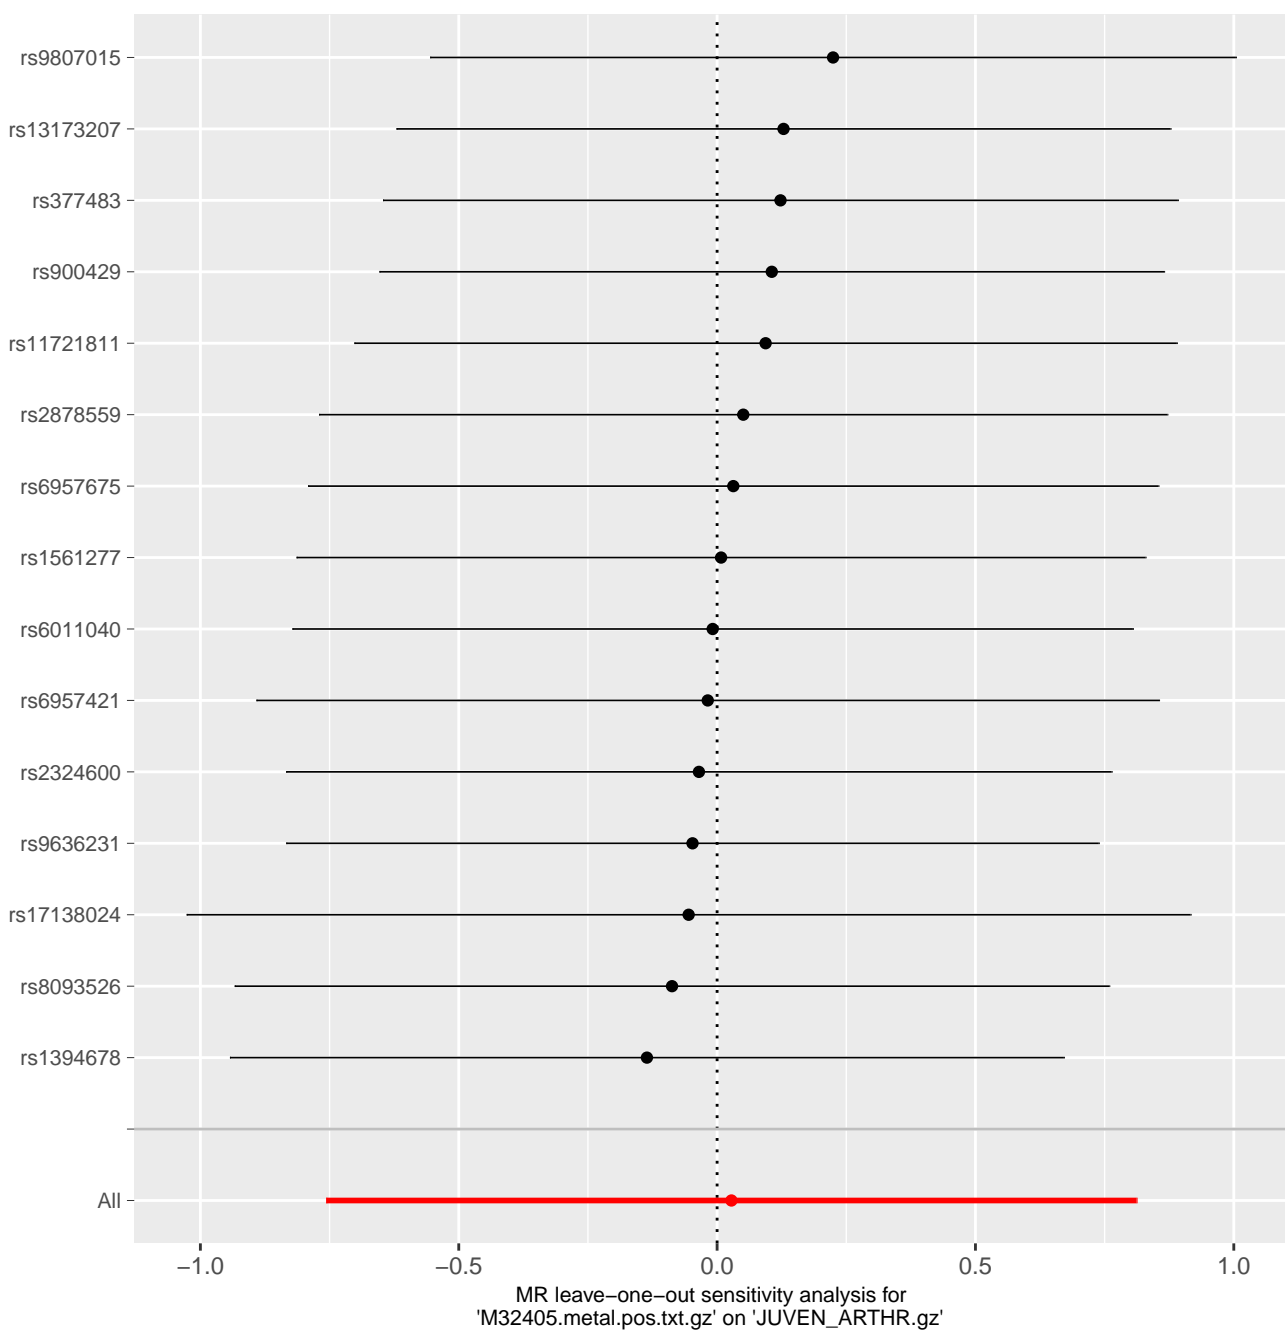

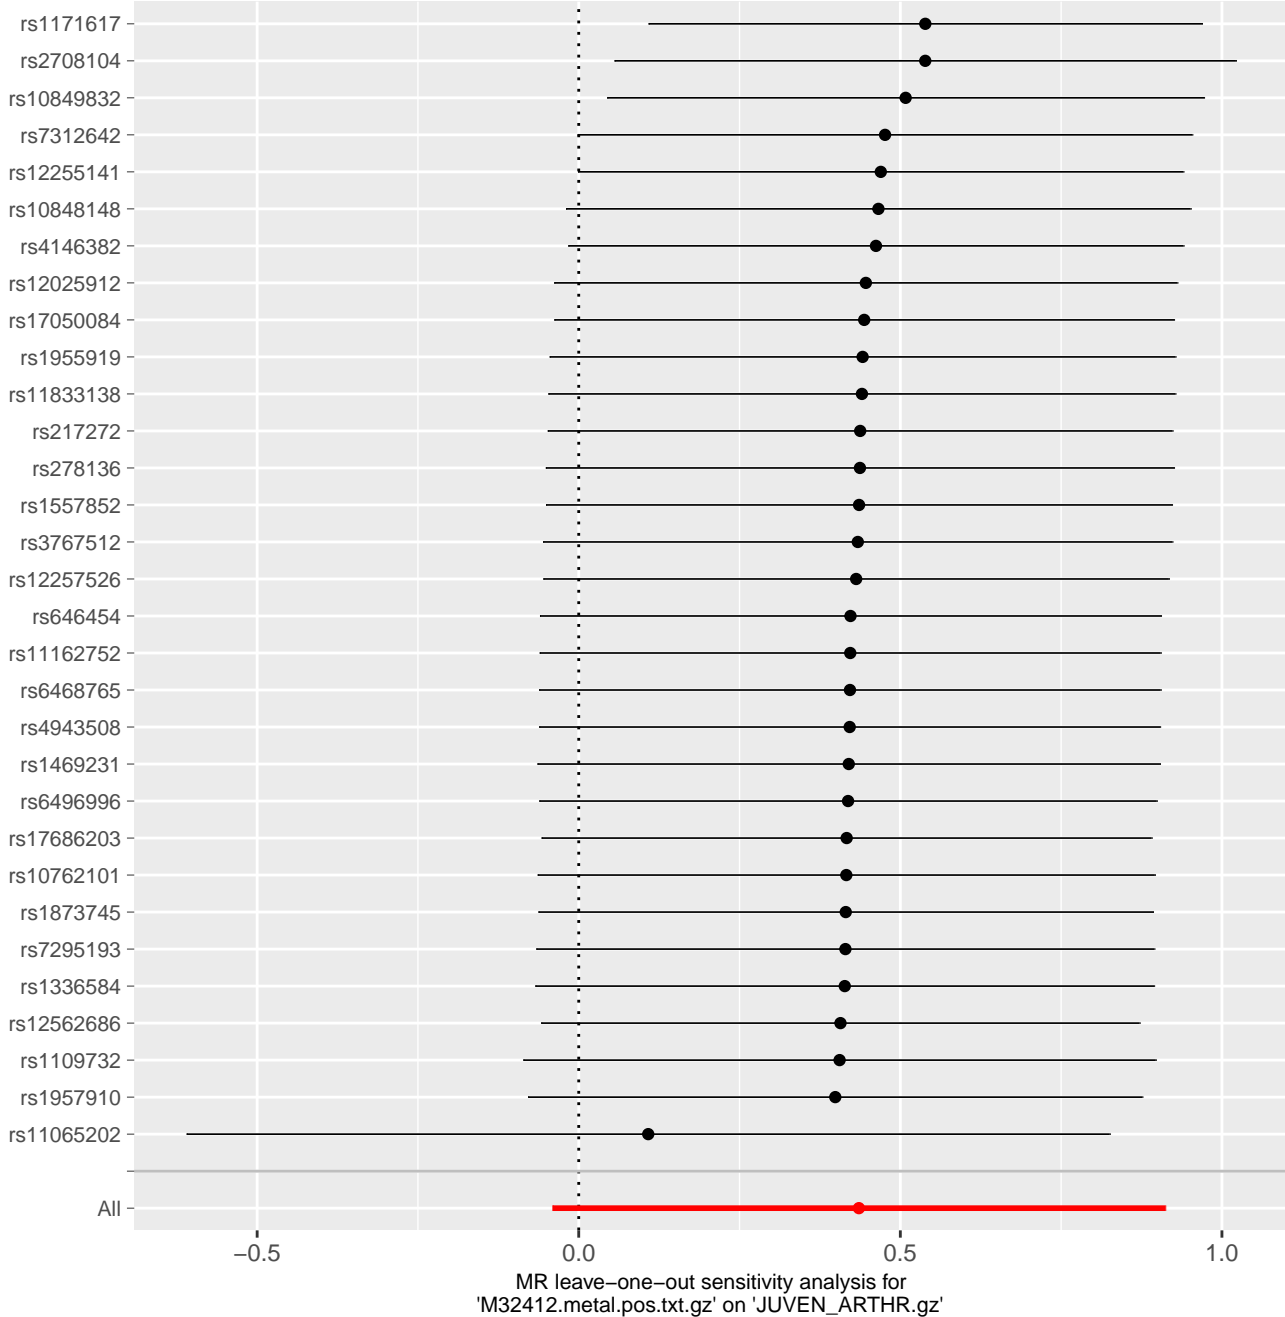

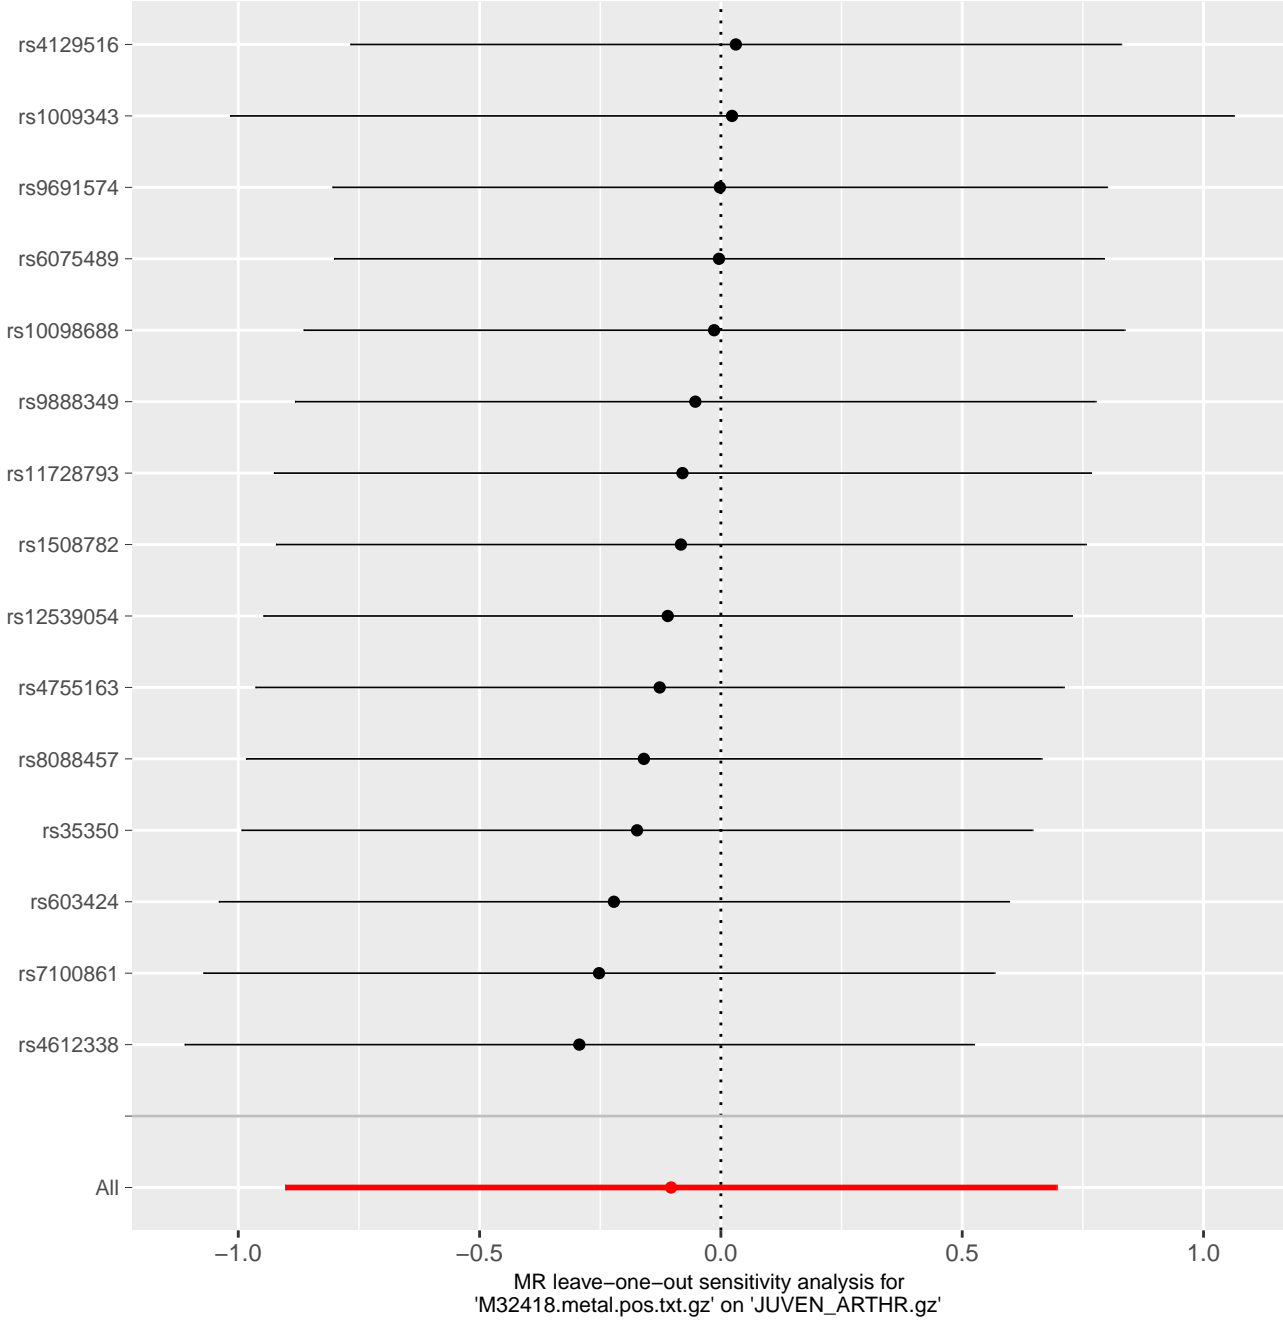

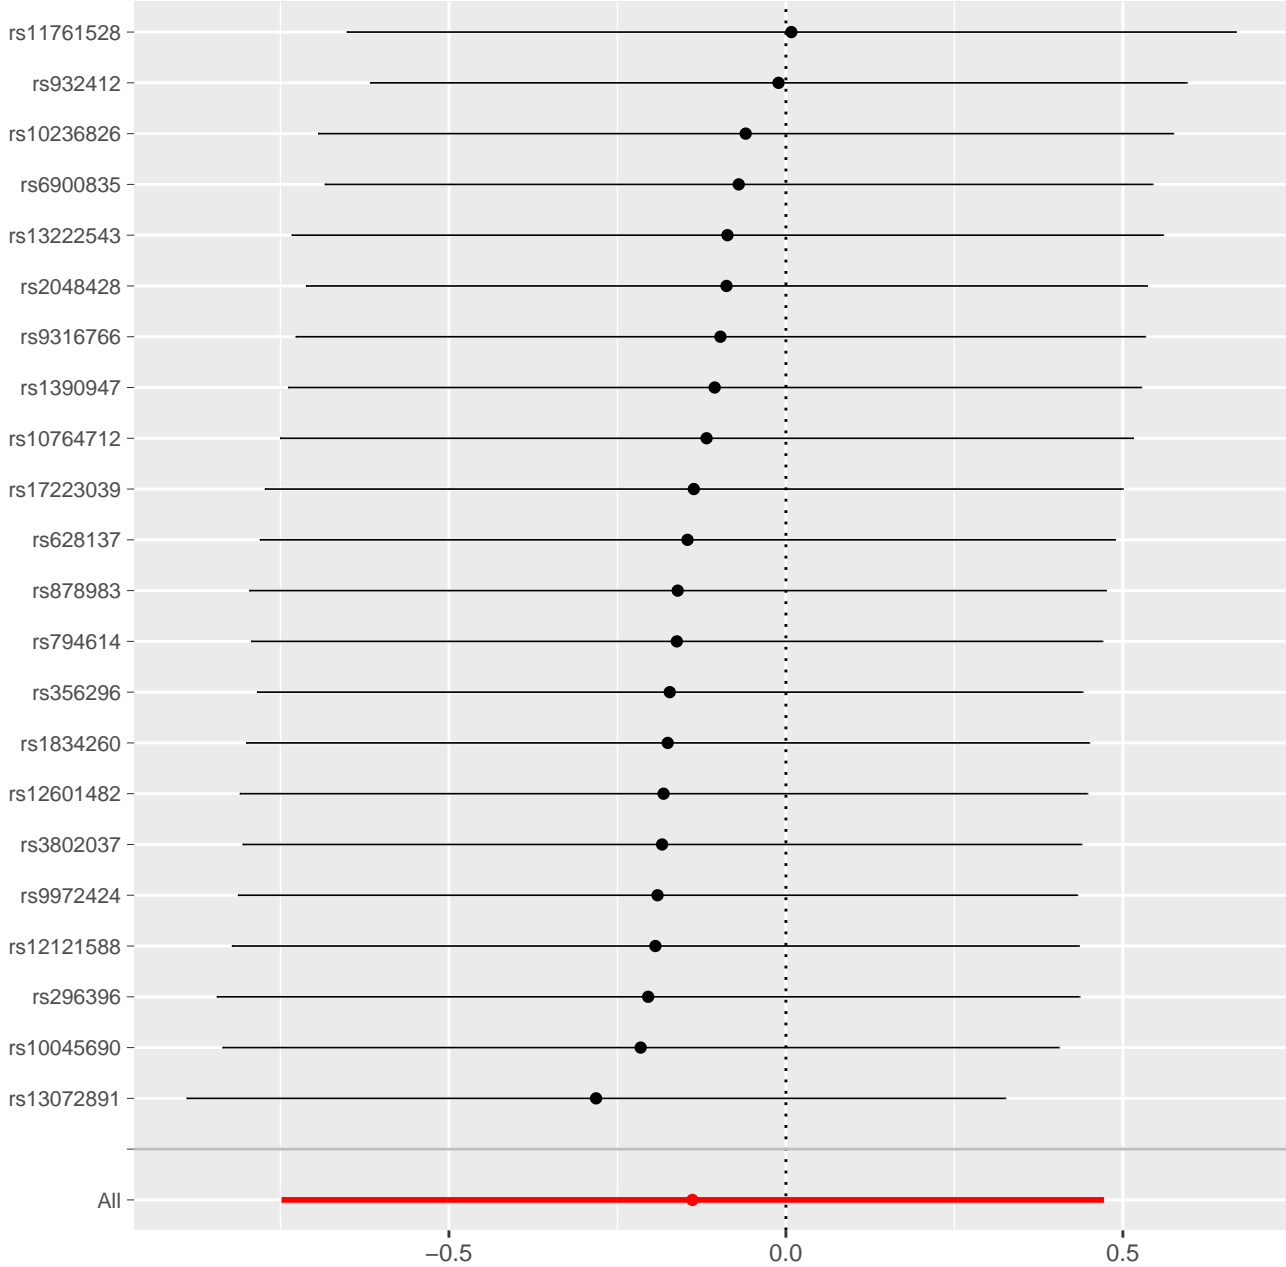

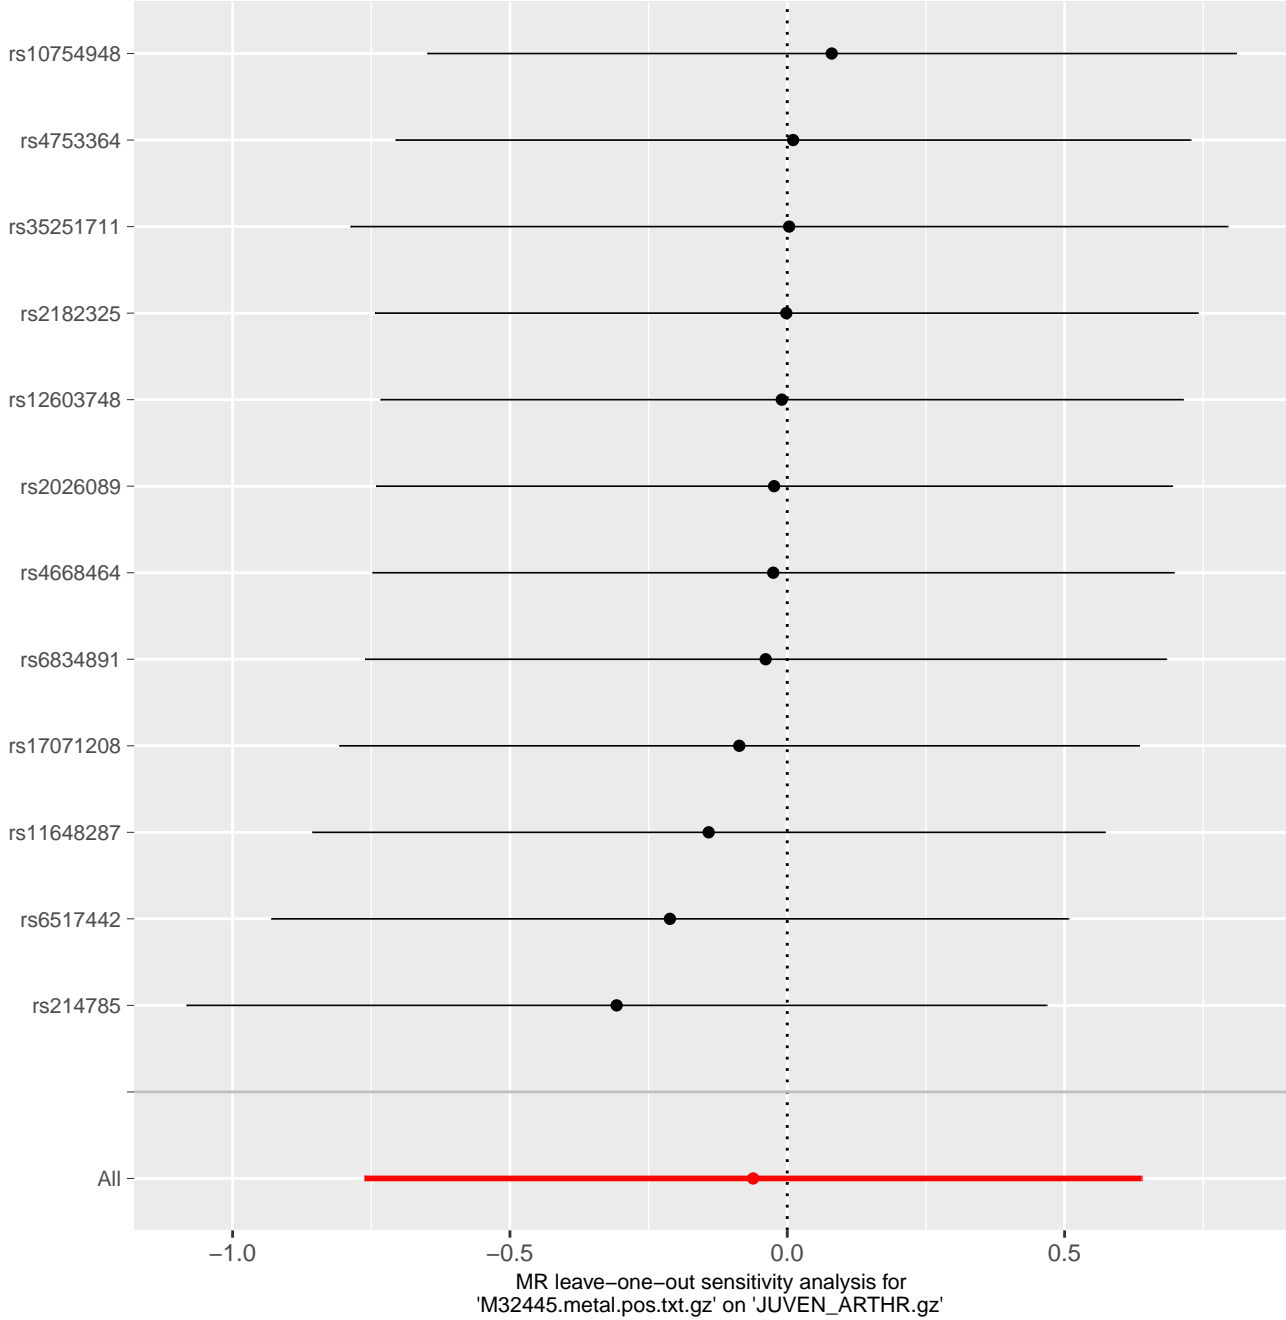

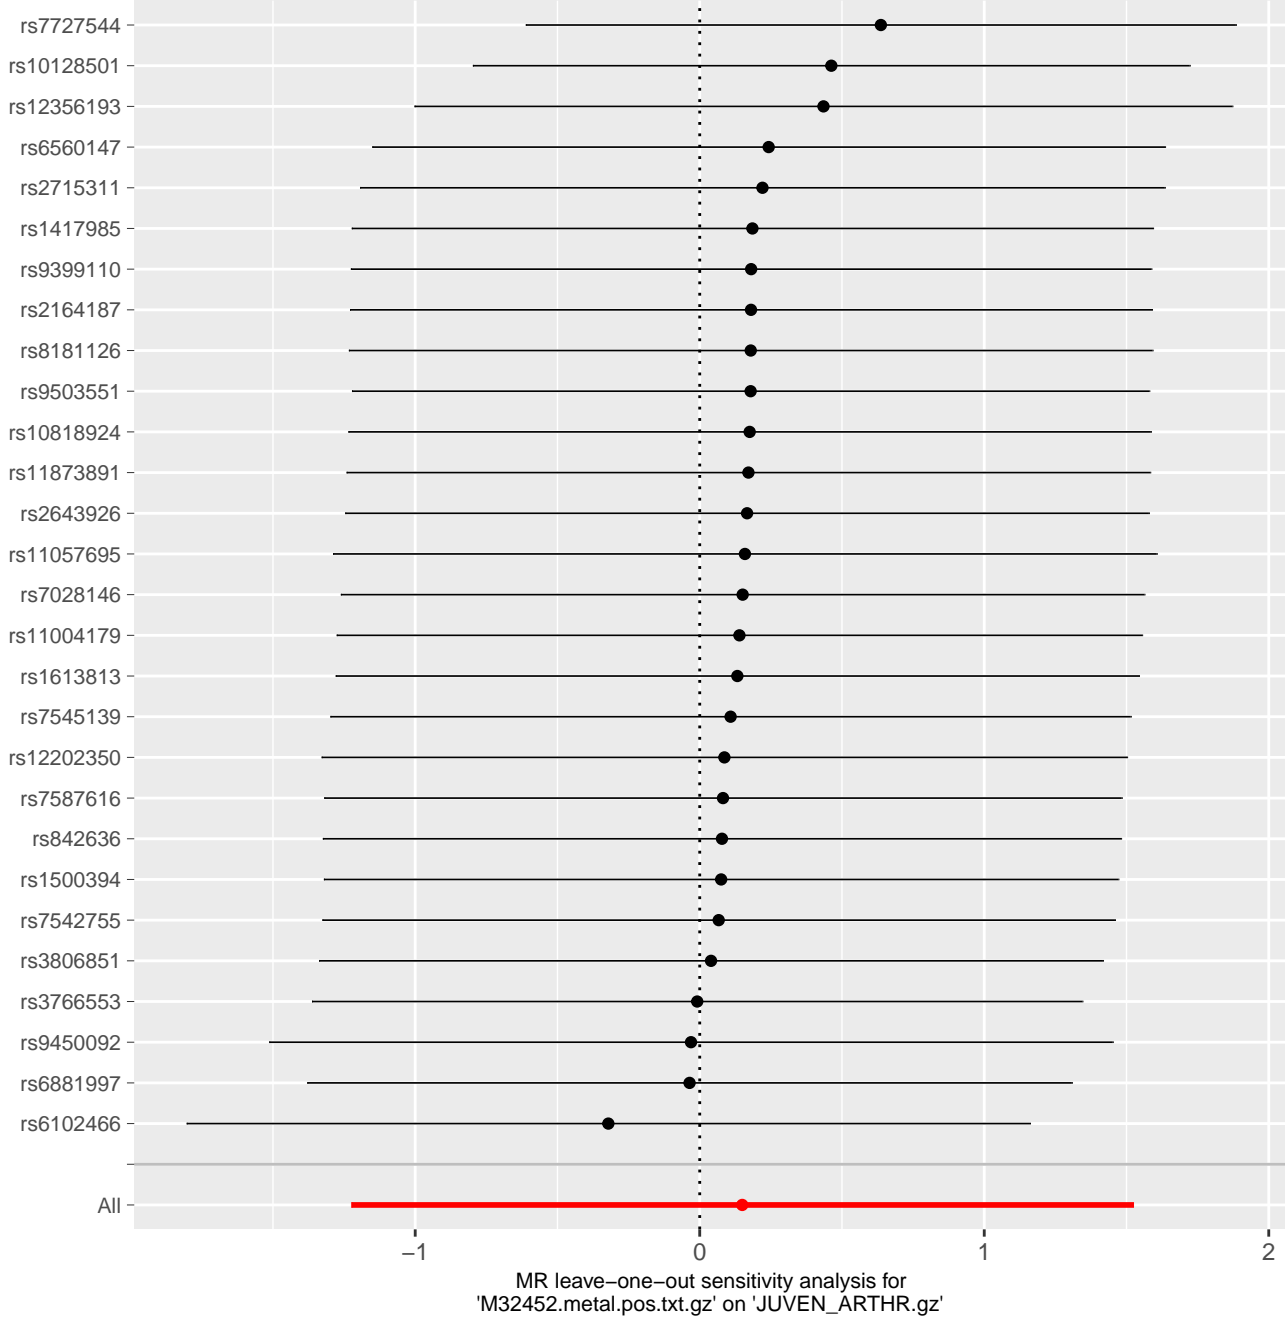



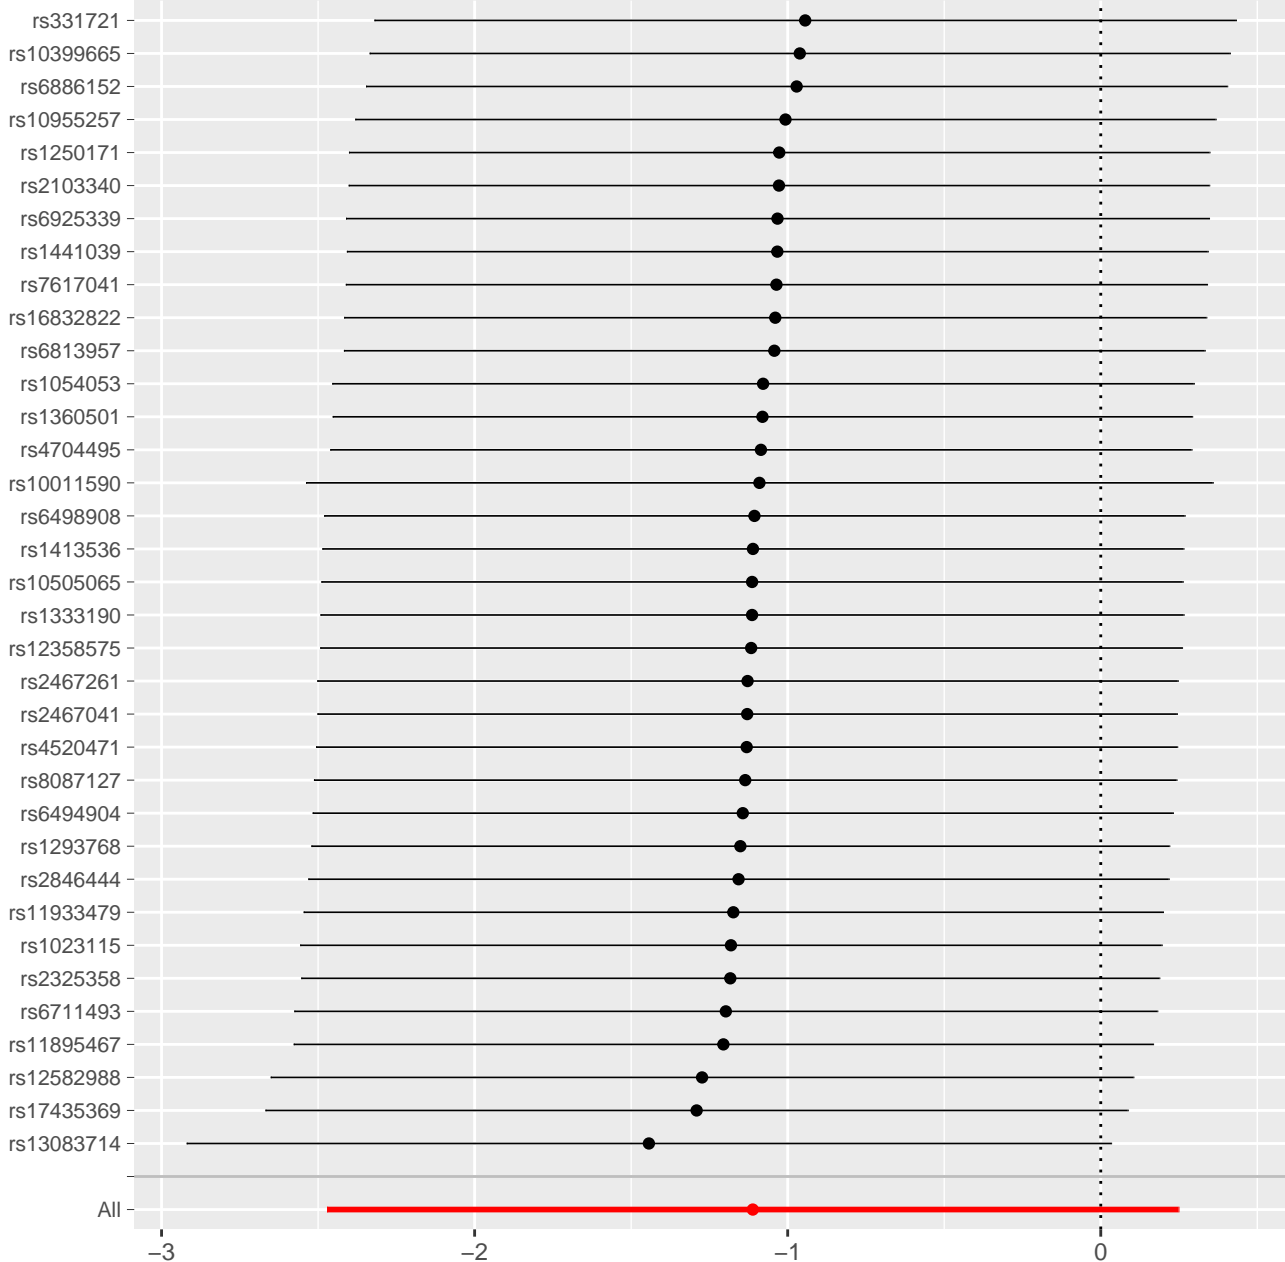

MR leave-one-out sensitivity analysis for 'M32489.metal.pos.txt.gz' on 'JUVEN\_ARTHR.gz'

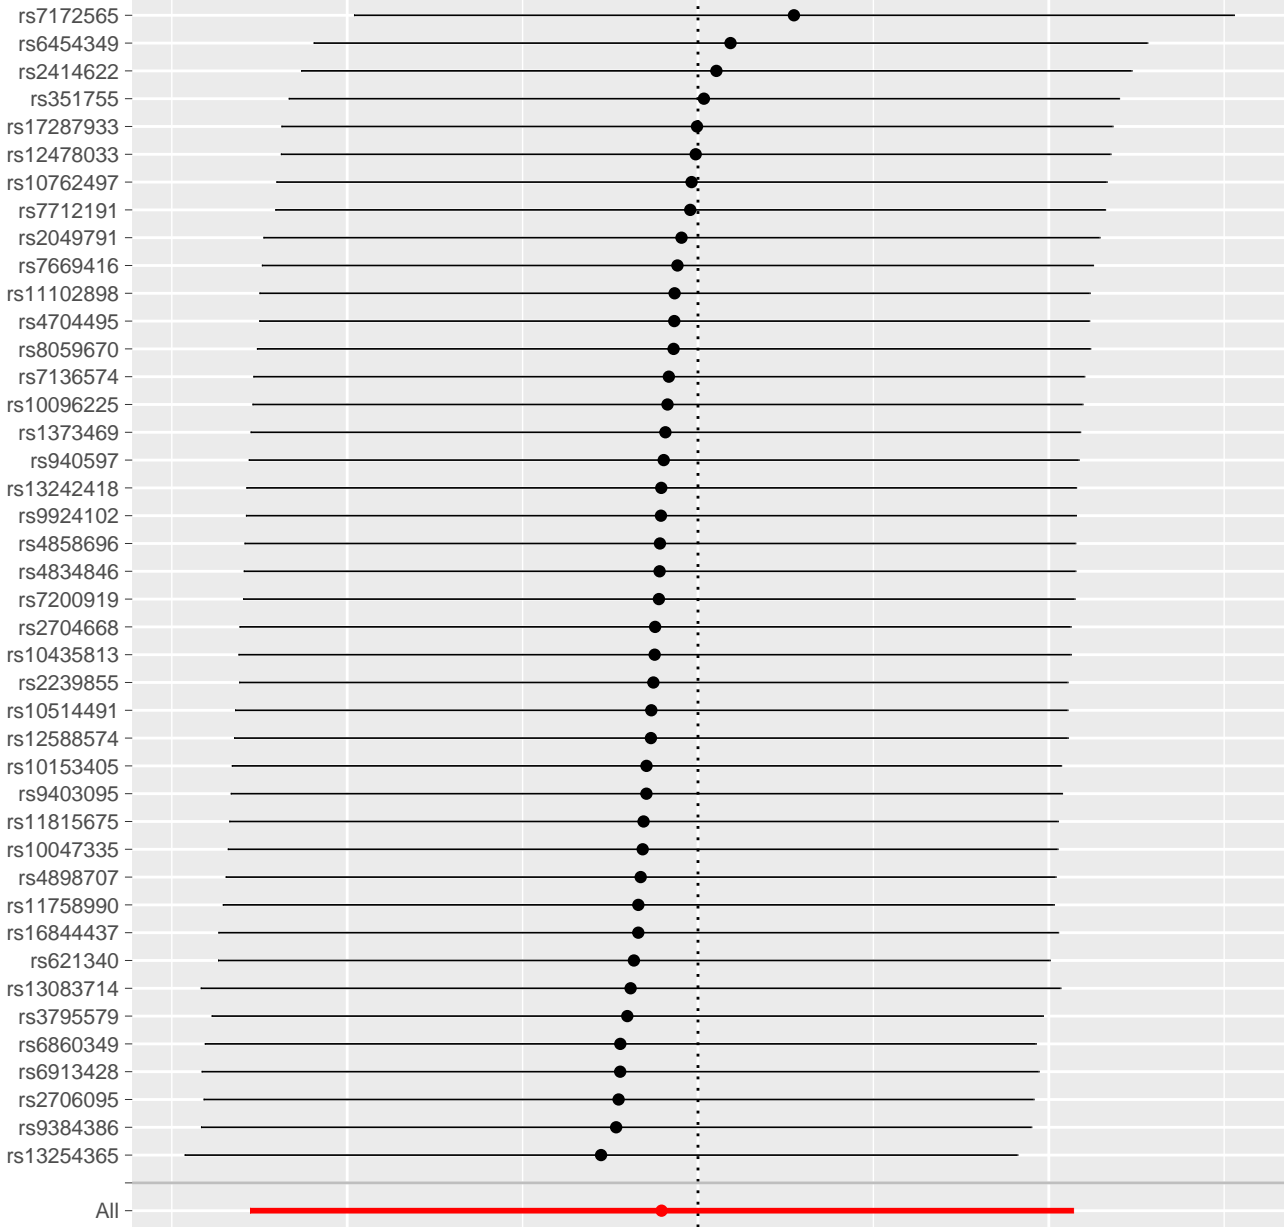

MR leave-one-out sensitivity analysis for 'M32492.metal.pos.txt.gz' on 'JUVEN\_ARTHR.gz'

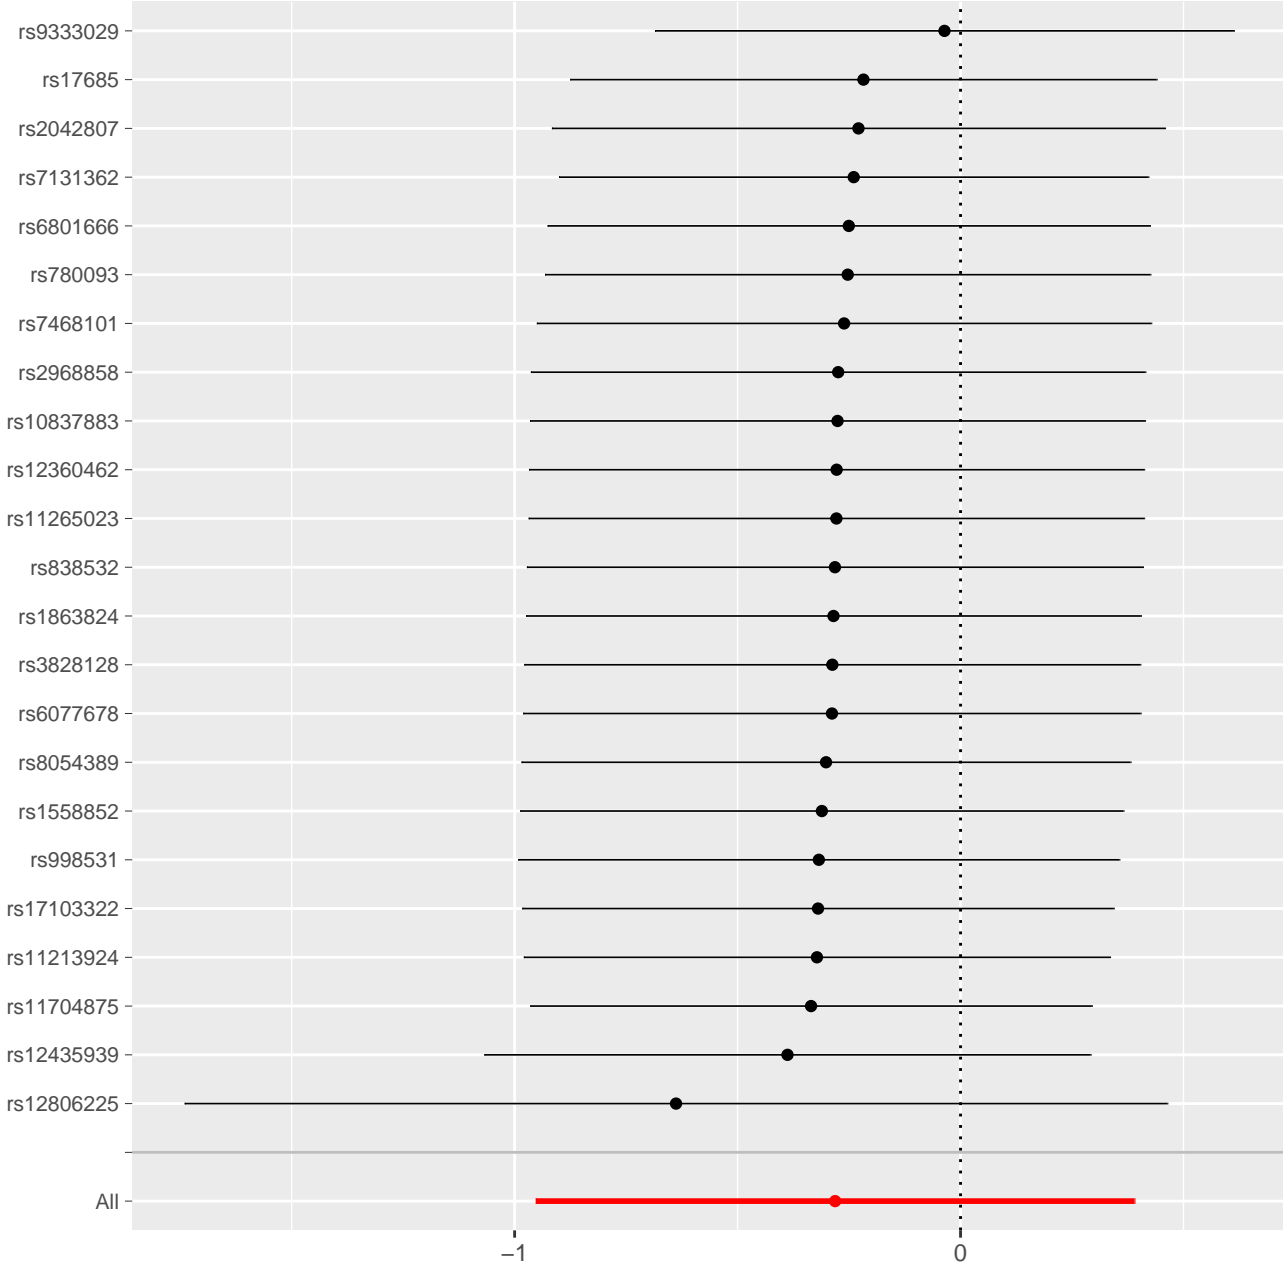

MR leave-one-out sensitivity analysis for 'M32497.metal.pos.txt.gz' on 'JUVEN\_ARTHR.gz'

rs16839086  
rs16936904  
rs174538  
rs10788823  
rs6957801  
rs16972160  
rs3793900  
rs2114655  
  
All

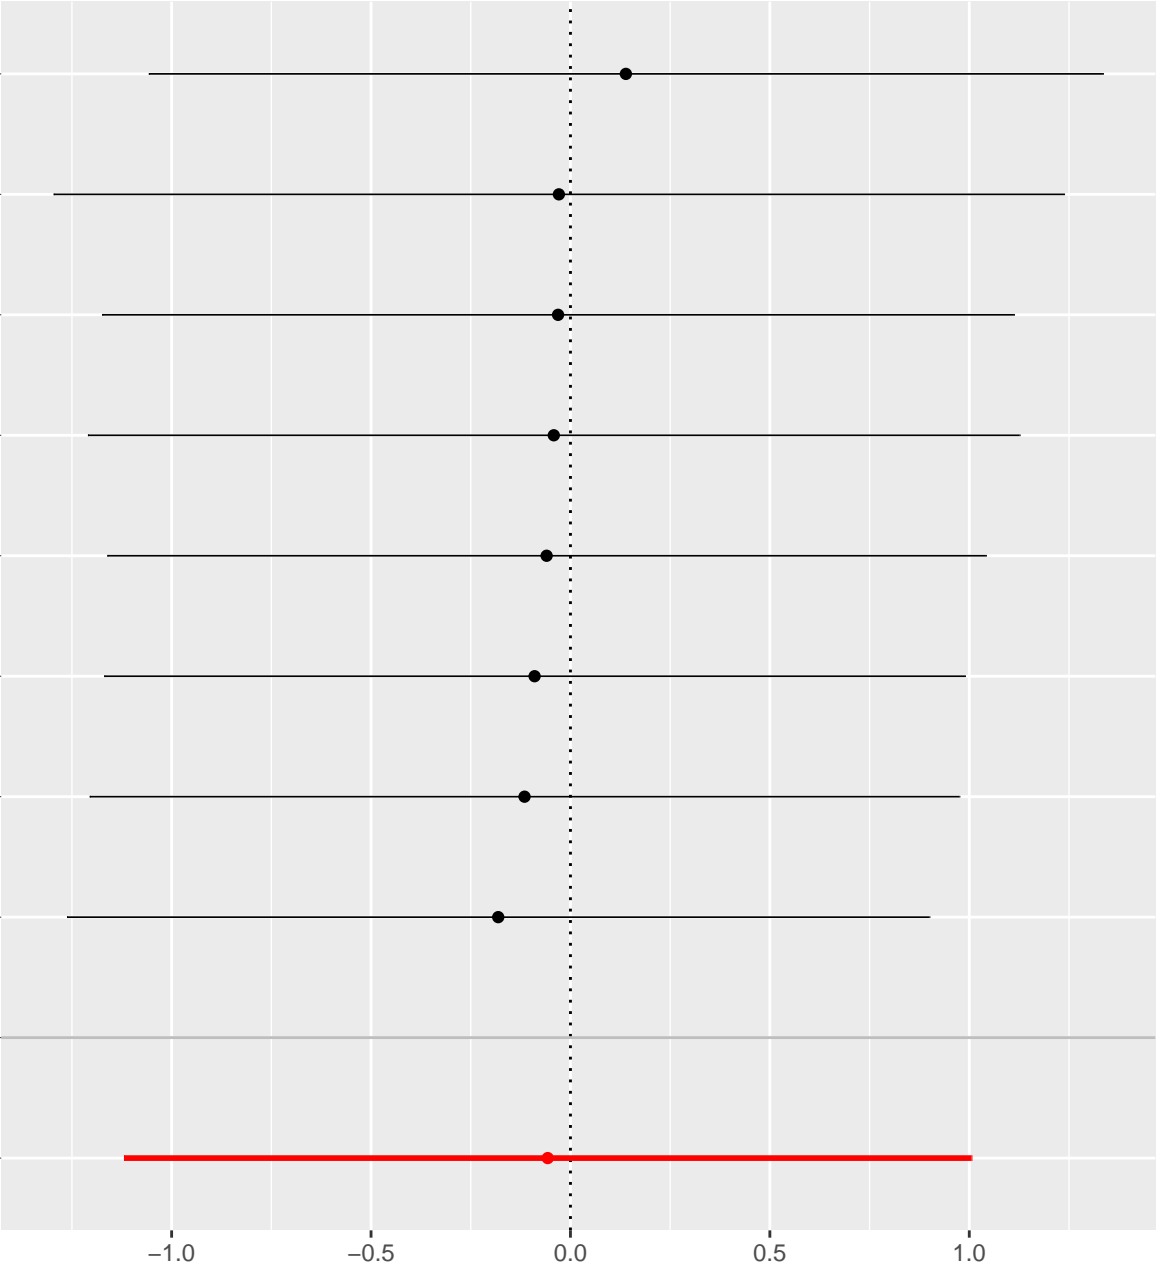

MR leave-one-out sensitivity analysis for 'M32504.metal.pos.txt.gz' on 'JUVEN\_ARTHR.gz'

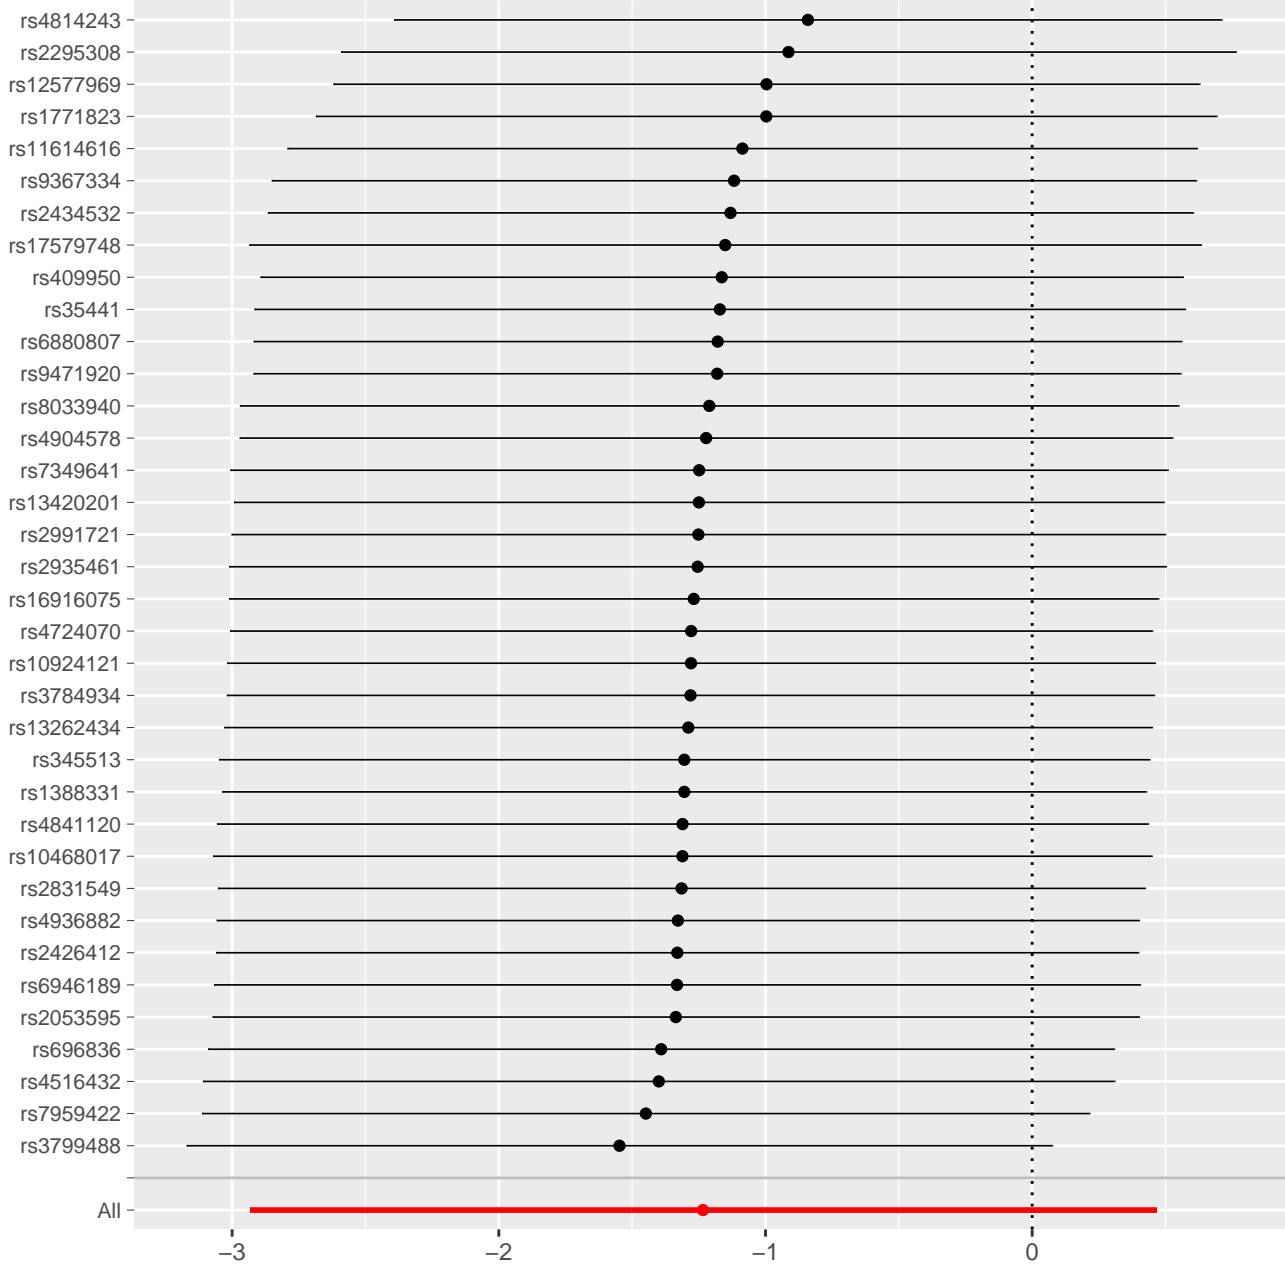

MR leave-one-out sensitivity analysis for 'M32518.metal.pos.txt.gz' on 'JUVEN\_ARTHR.gz'

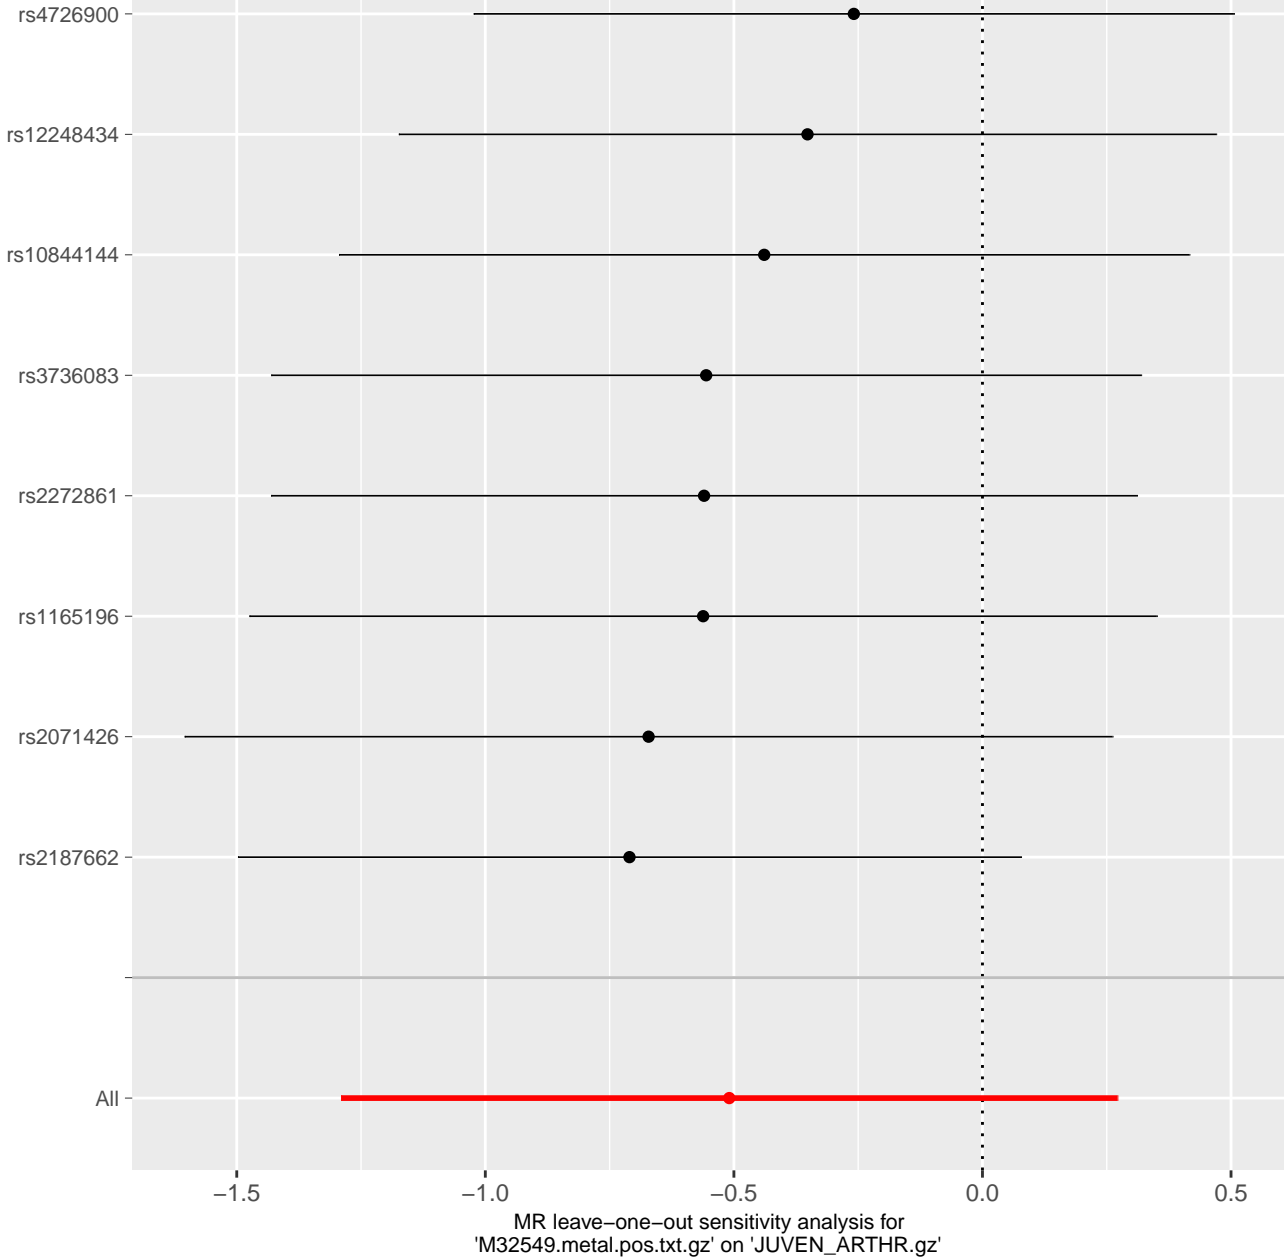

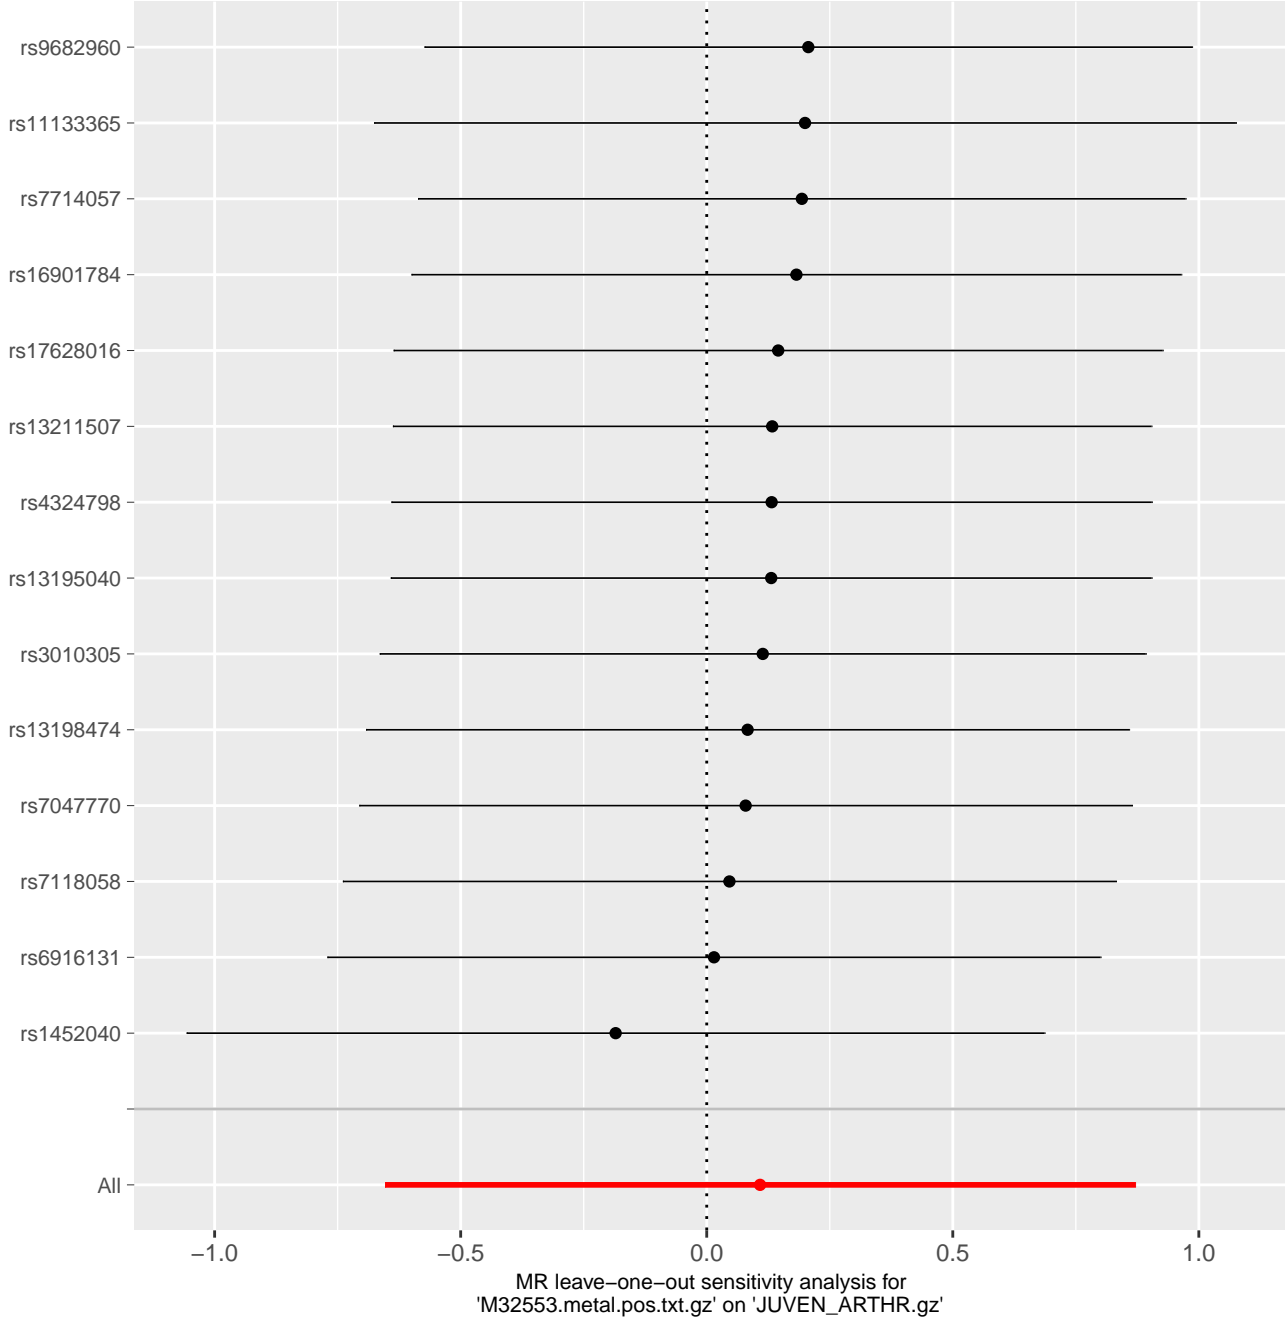

rs1344215  
rs6692597  
rs8071320  
rs1447149  
rs8049811  
rs12920537  
rs2834622  
rs17578989  
rs883118  
rs4549297

All

-0.5

0.0

0.5

1.0

1.5

MR leave-one-out sensitivity analysis for  
'M32557.metal.pos.txt.gz' on 'JUVEN\_ARTHR.gz'

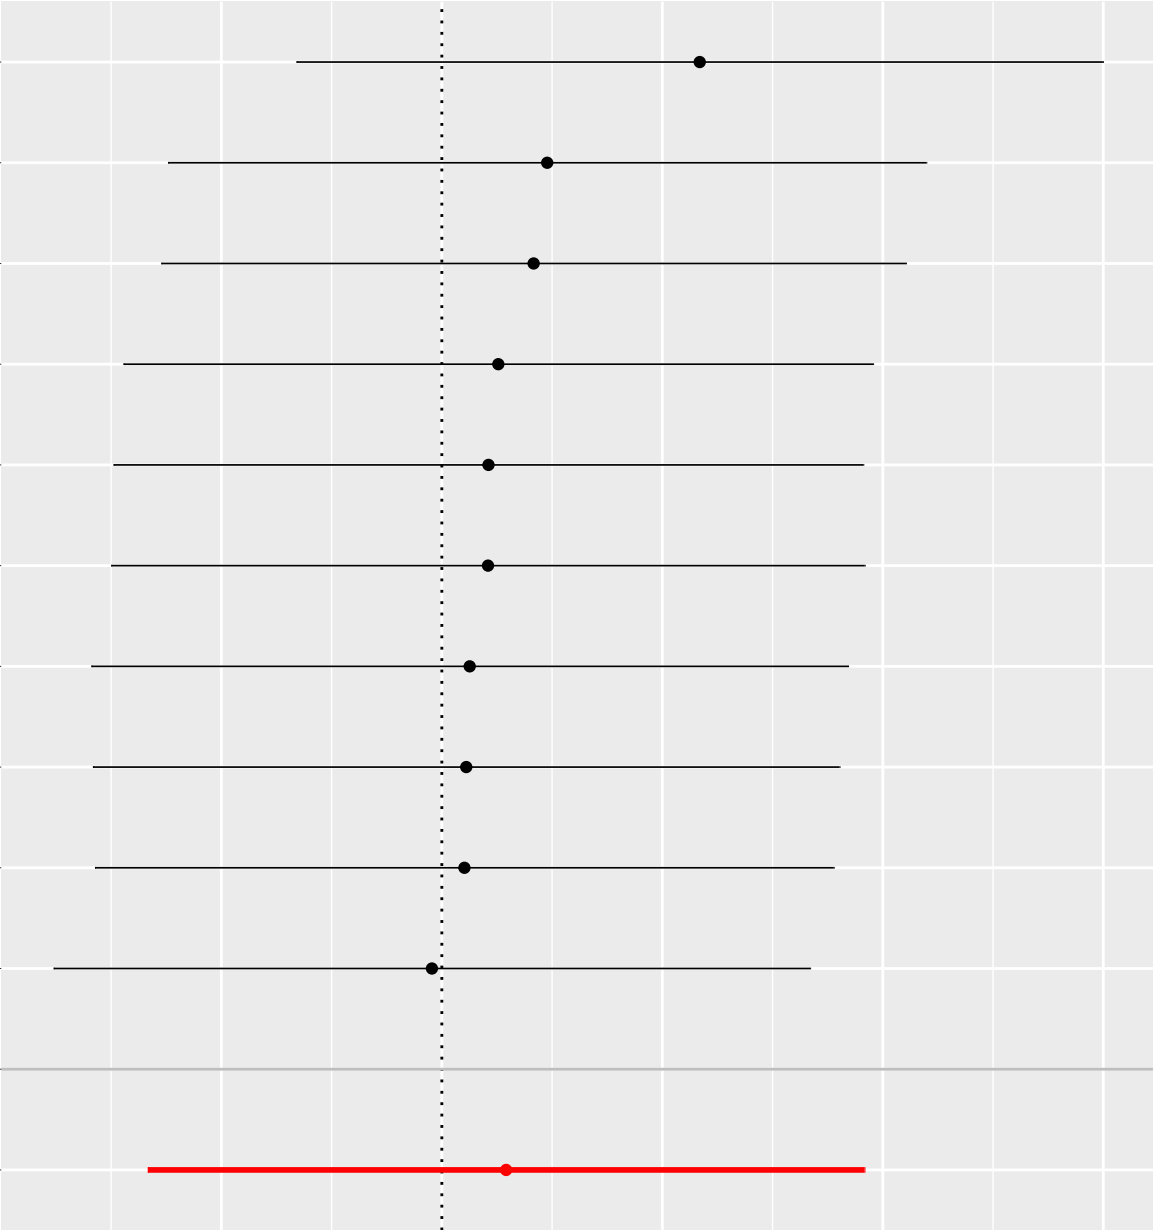



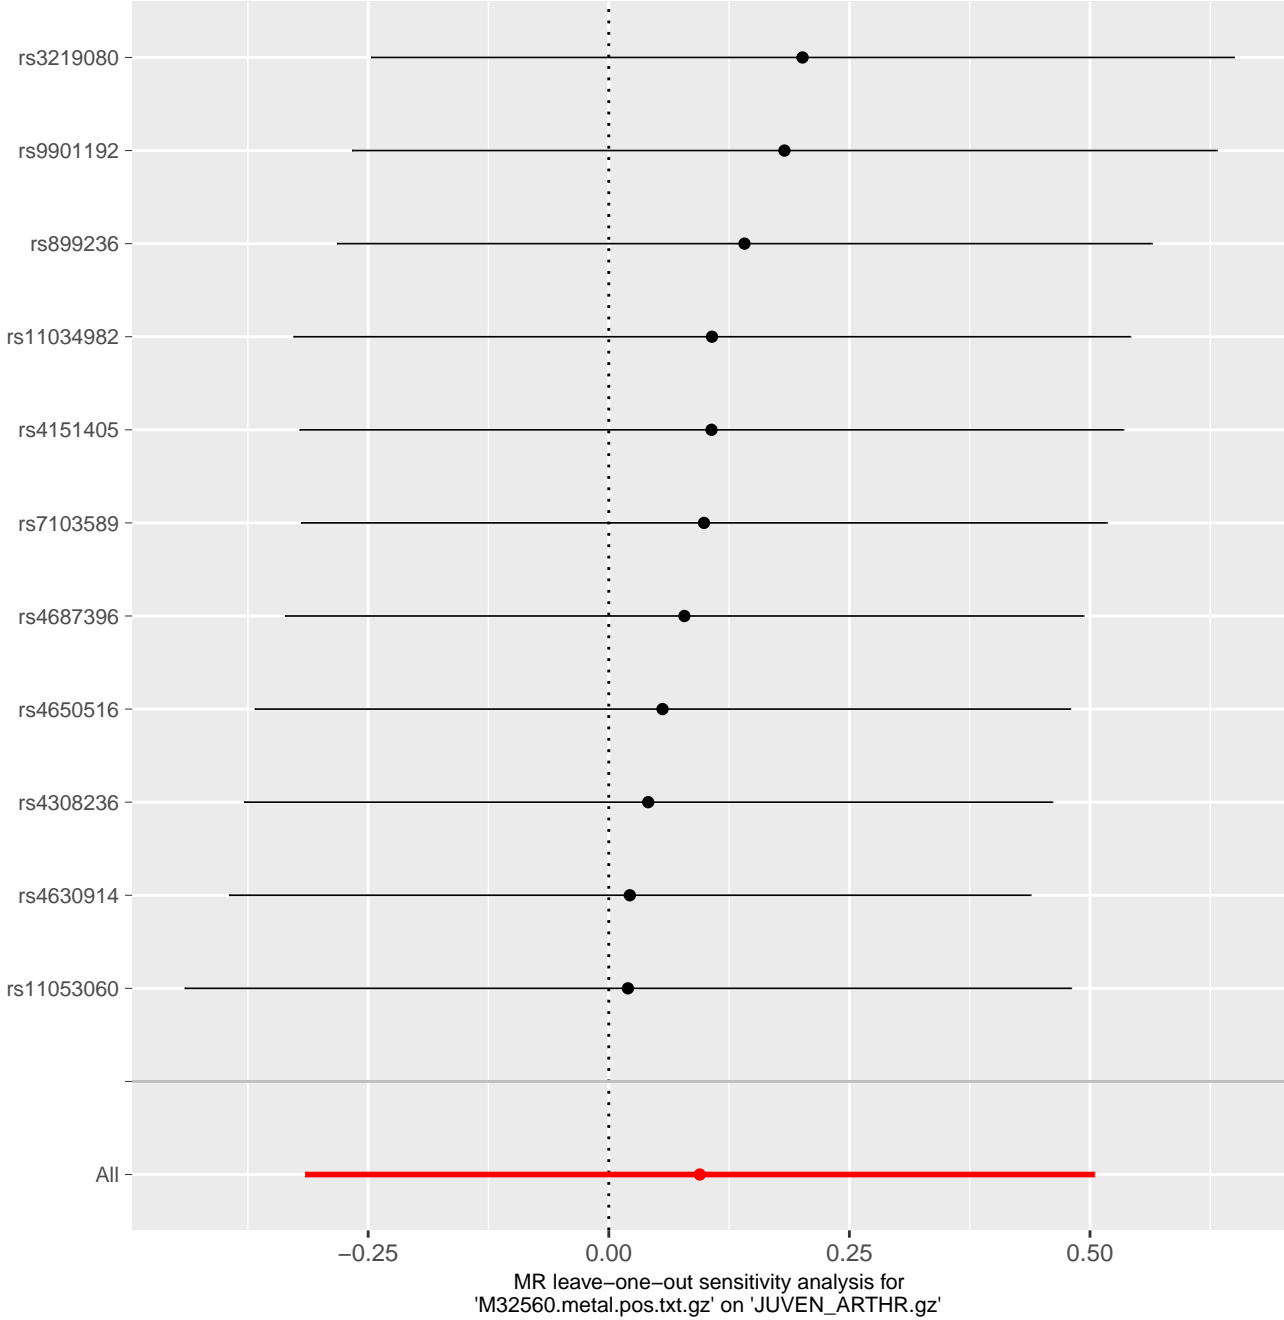

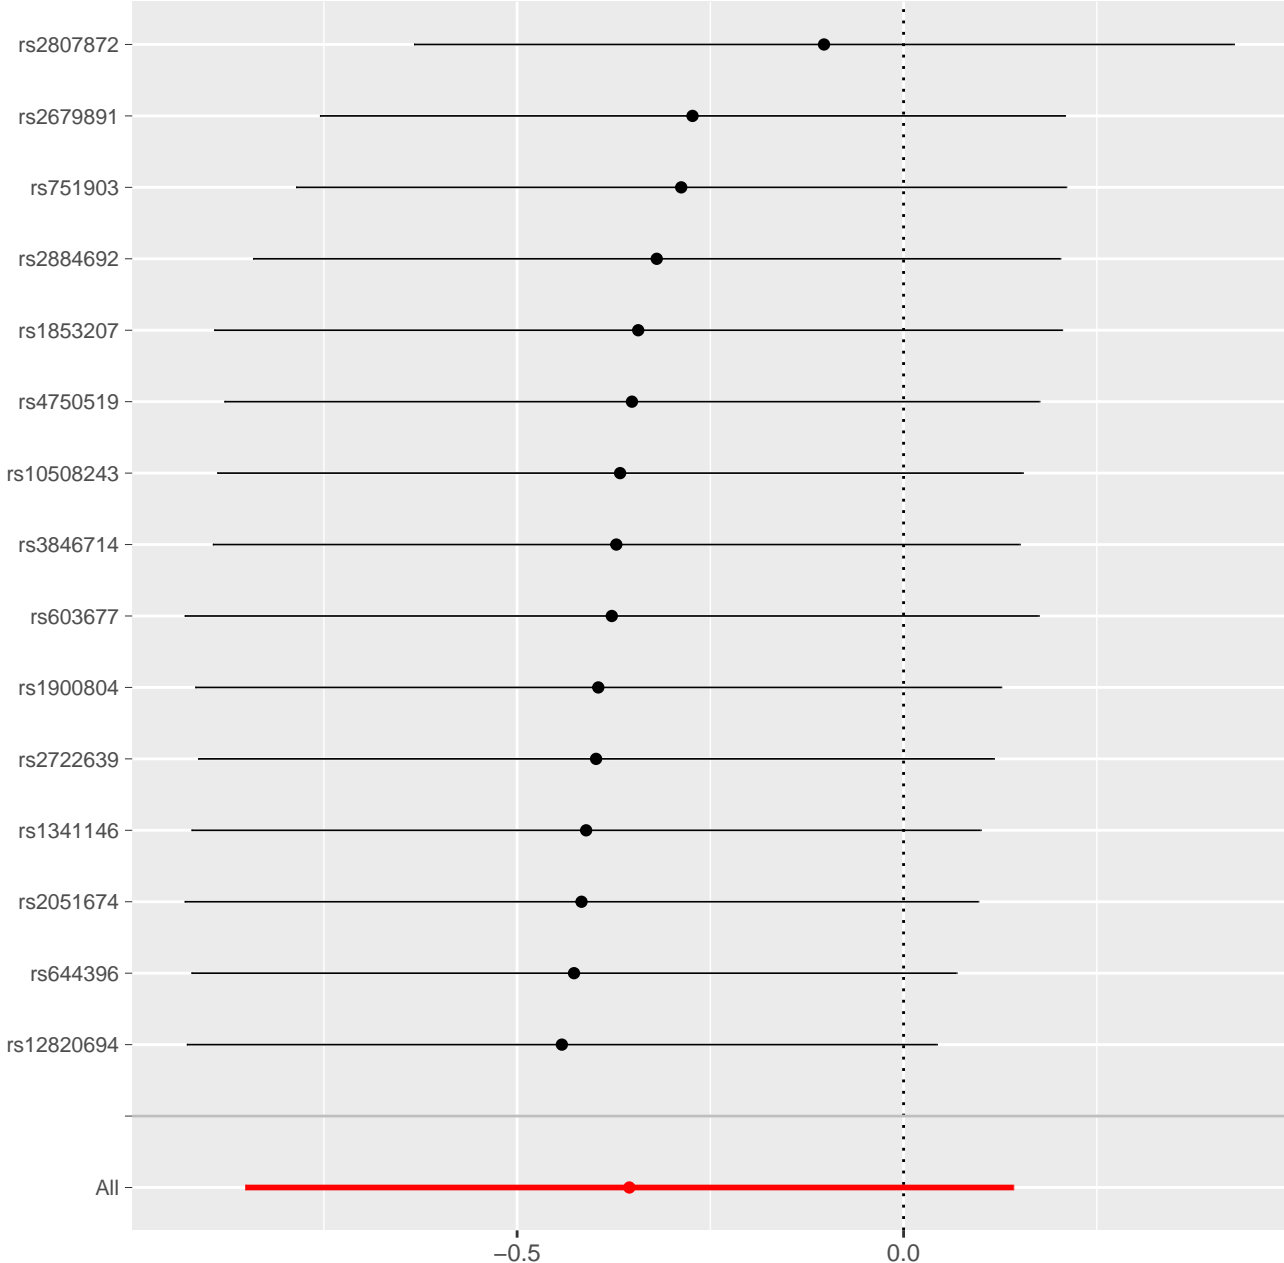

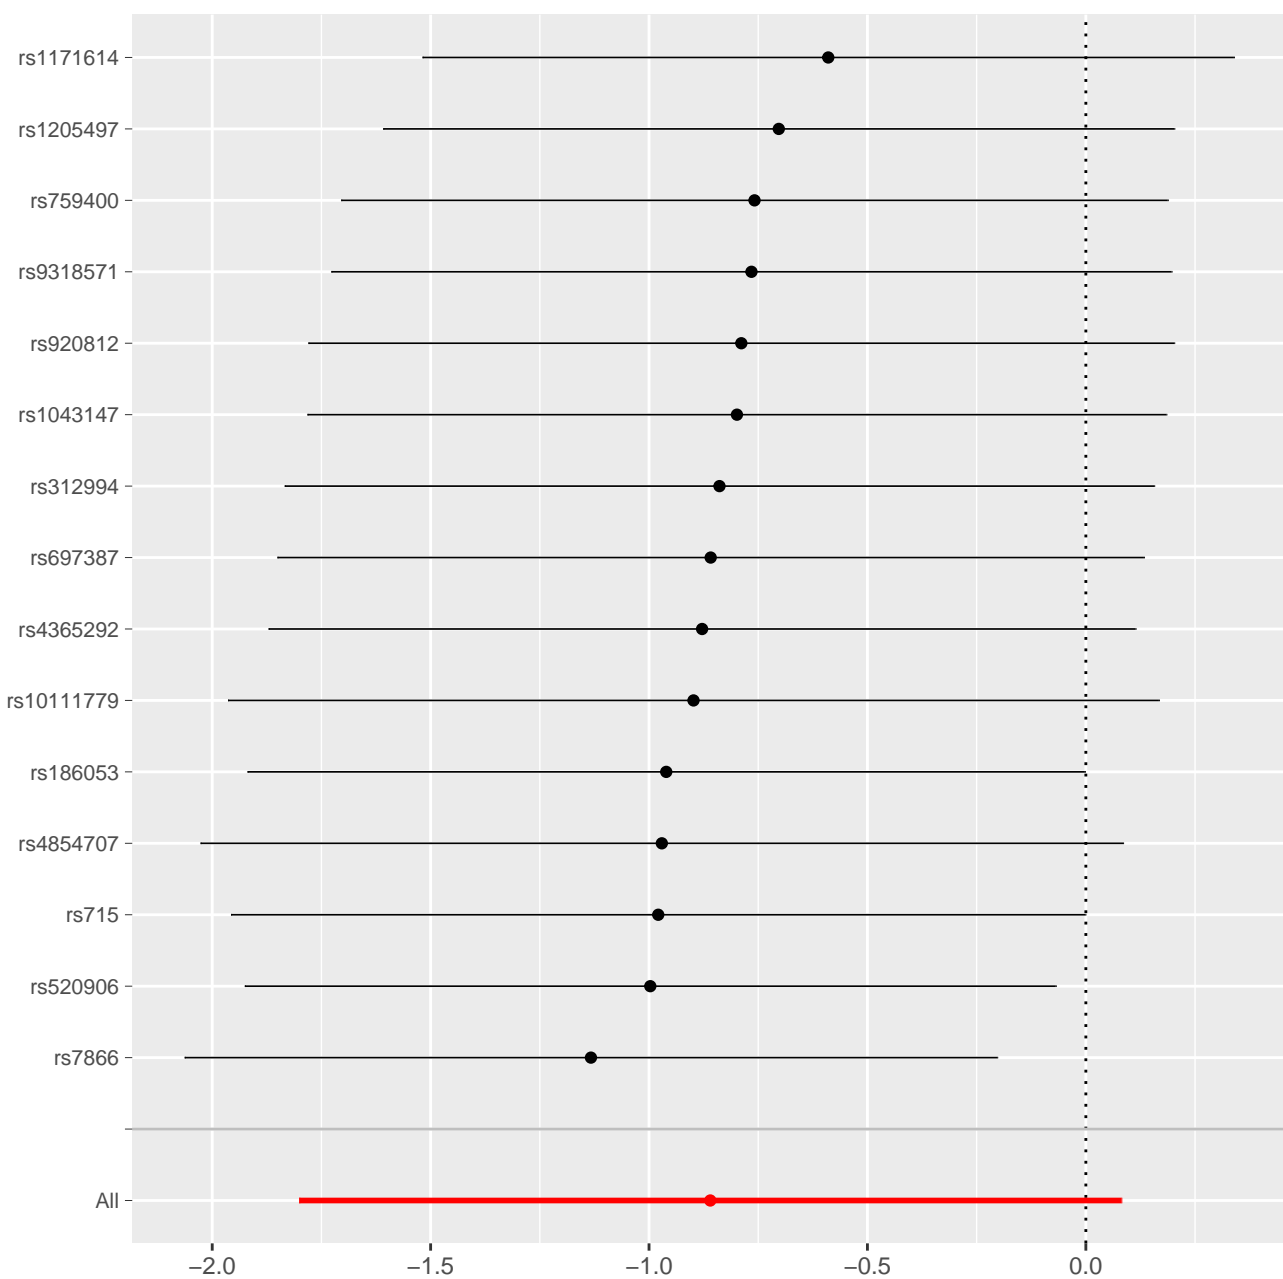

MR leave-one-out sensitivity analysis for 'M32578.metal.pos.txt.gz' on 'JUVEN\_ARTHR.gz'

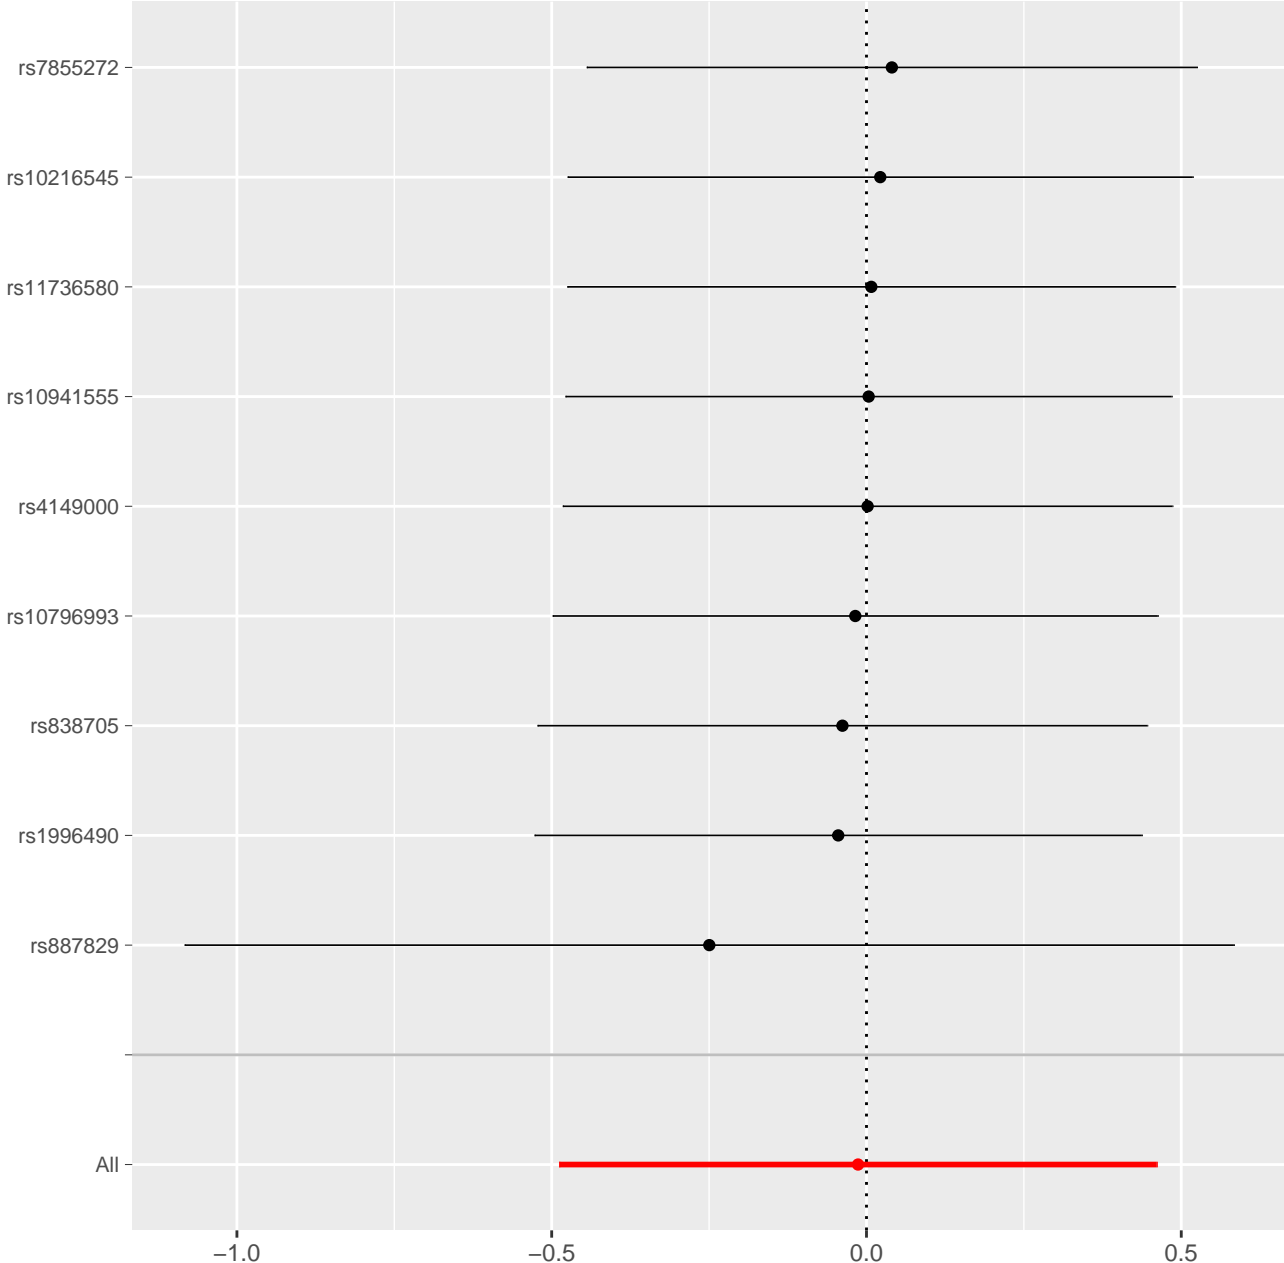

MR leave-one-out sensitivity analysis for 'M32586.metal.pos.txt.gz' on 'JUVEN\_ARTHR.gz'

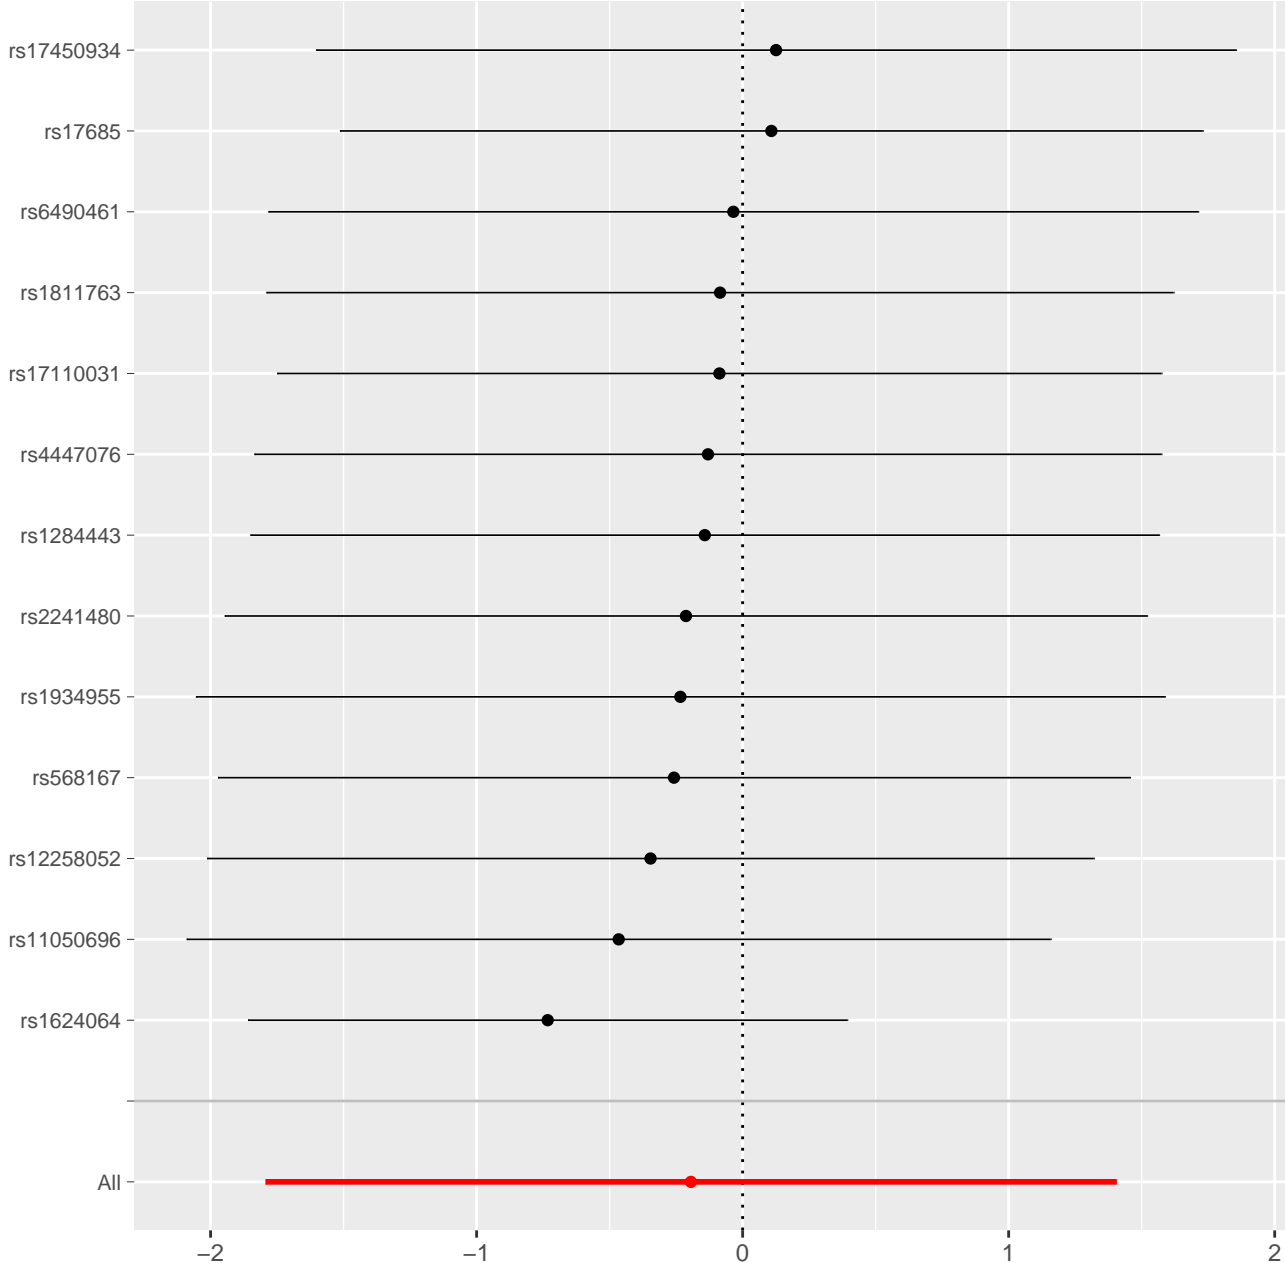

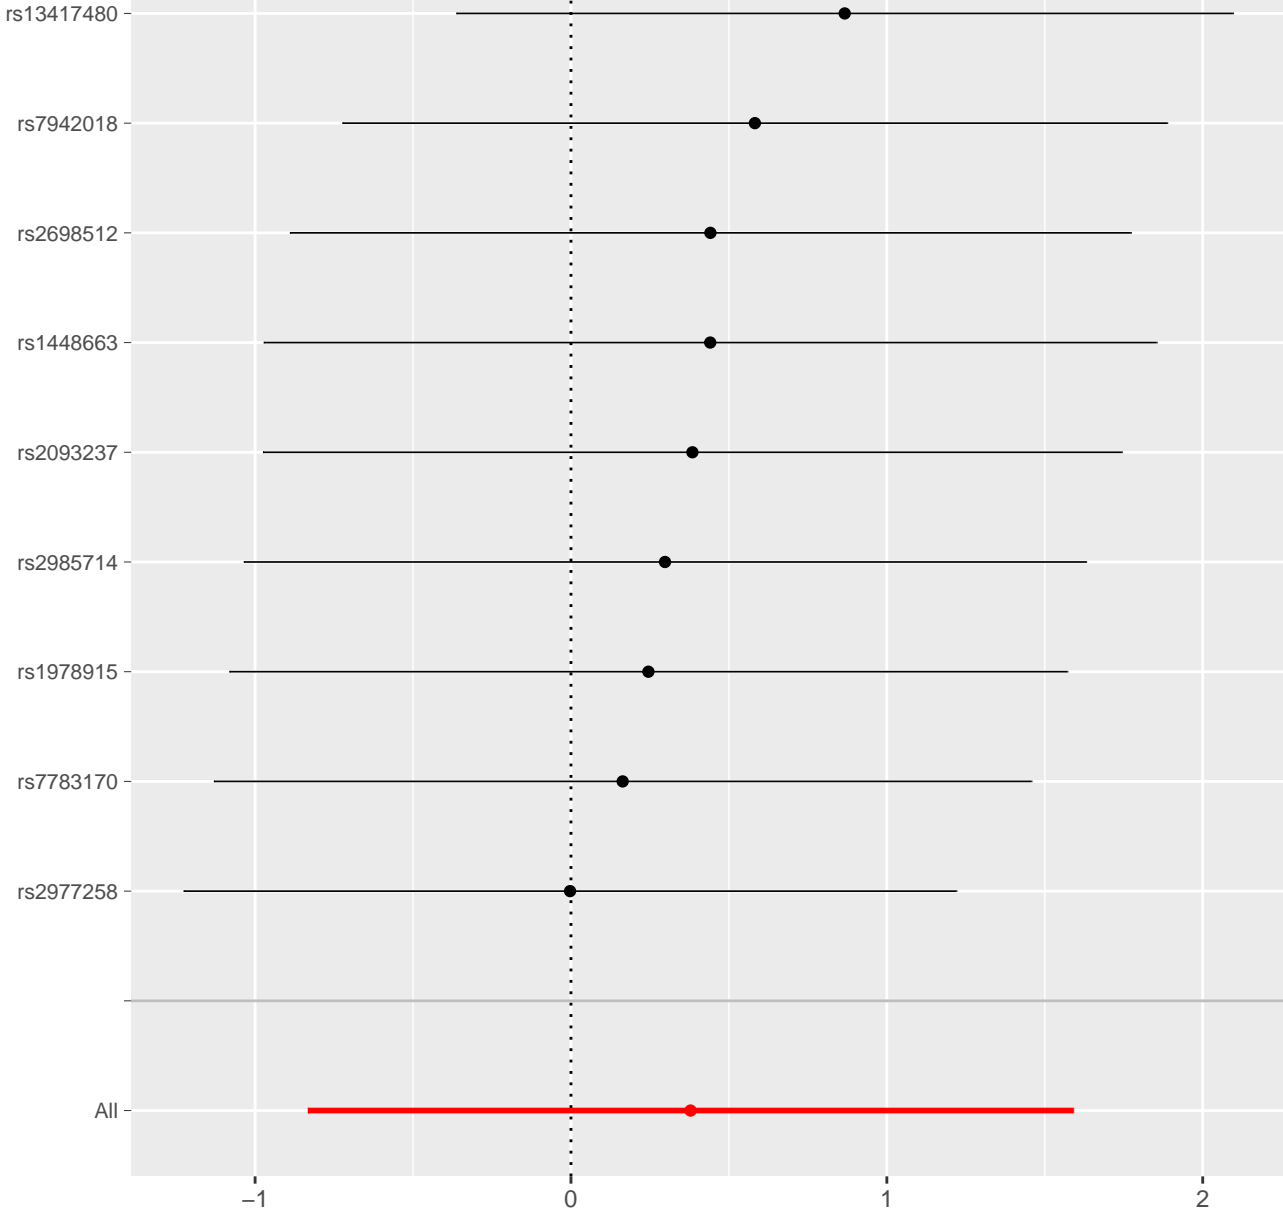

MR leave-one-out sensitivity analysis for 'M32593.metal.pos.txt.gz' on 'JUVEN\_ARTHR.gz'

rs7847689

rs7997078

rs6879662

rs4149056

rs1322374

rs8130944

rs1823803

rs6453786

All

-1.0

-0.5

0.0

0.5

MR leave-one-out sensitivity analysis for  
'M32616.metal.pos.txt.gz' on 'JUVEN\_ARTHR.gz'

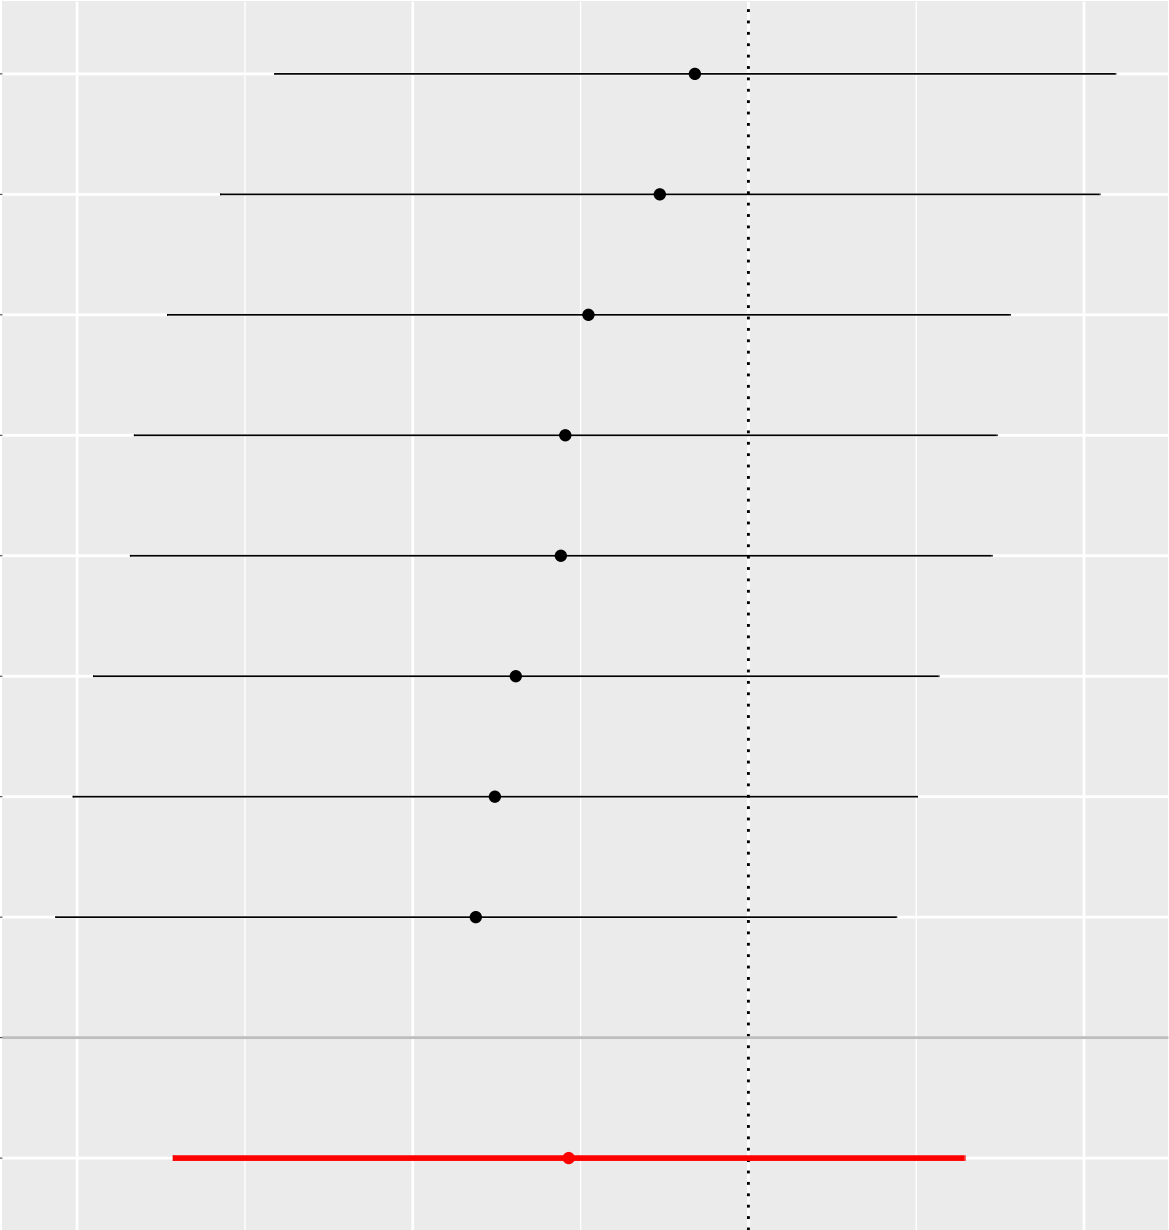

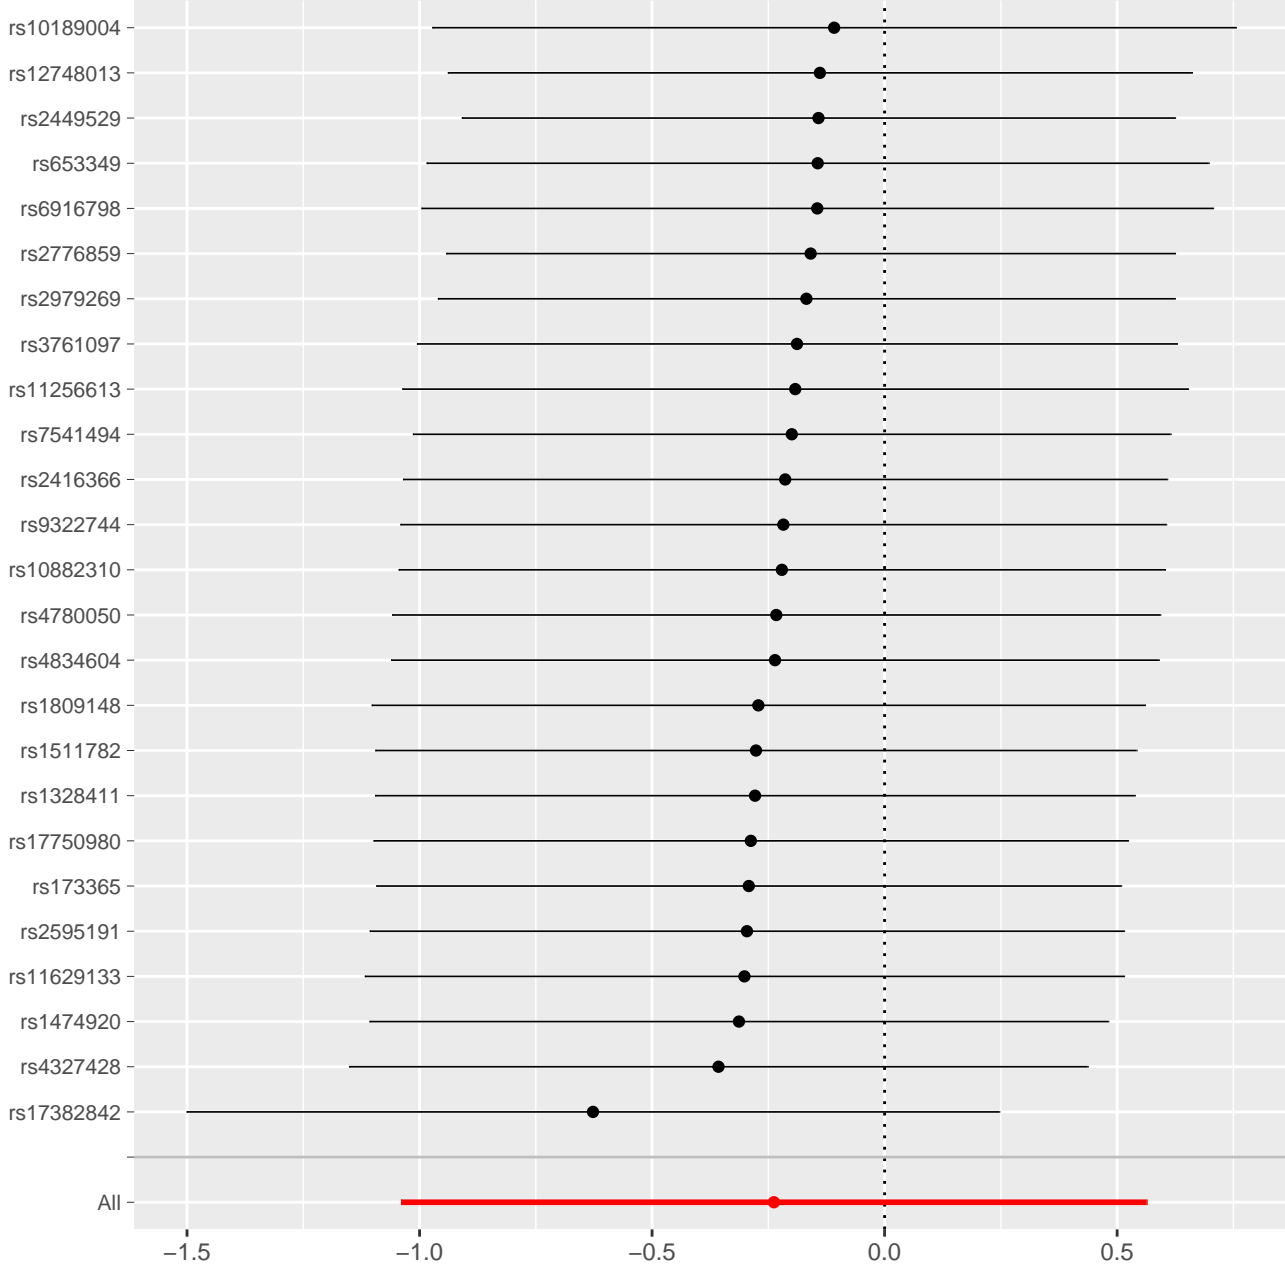



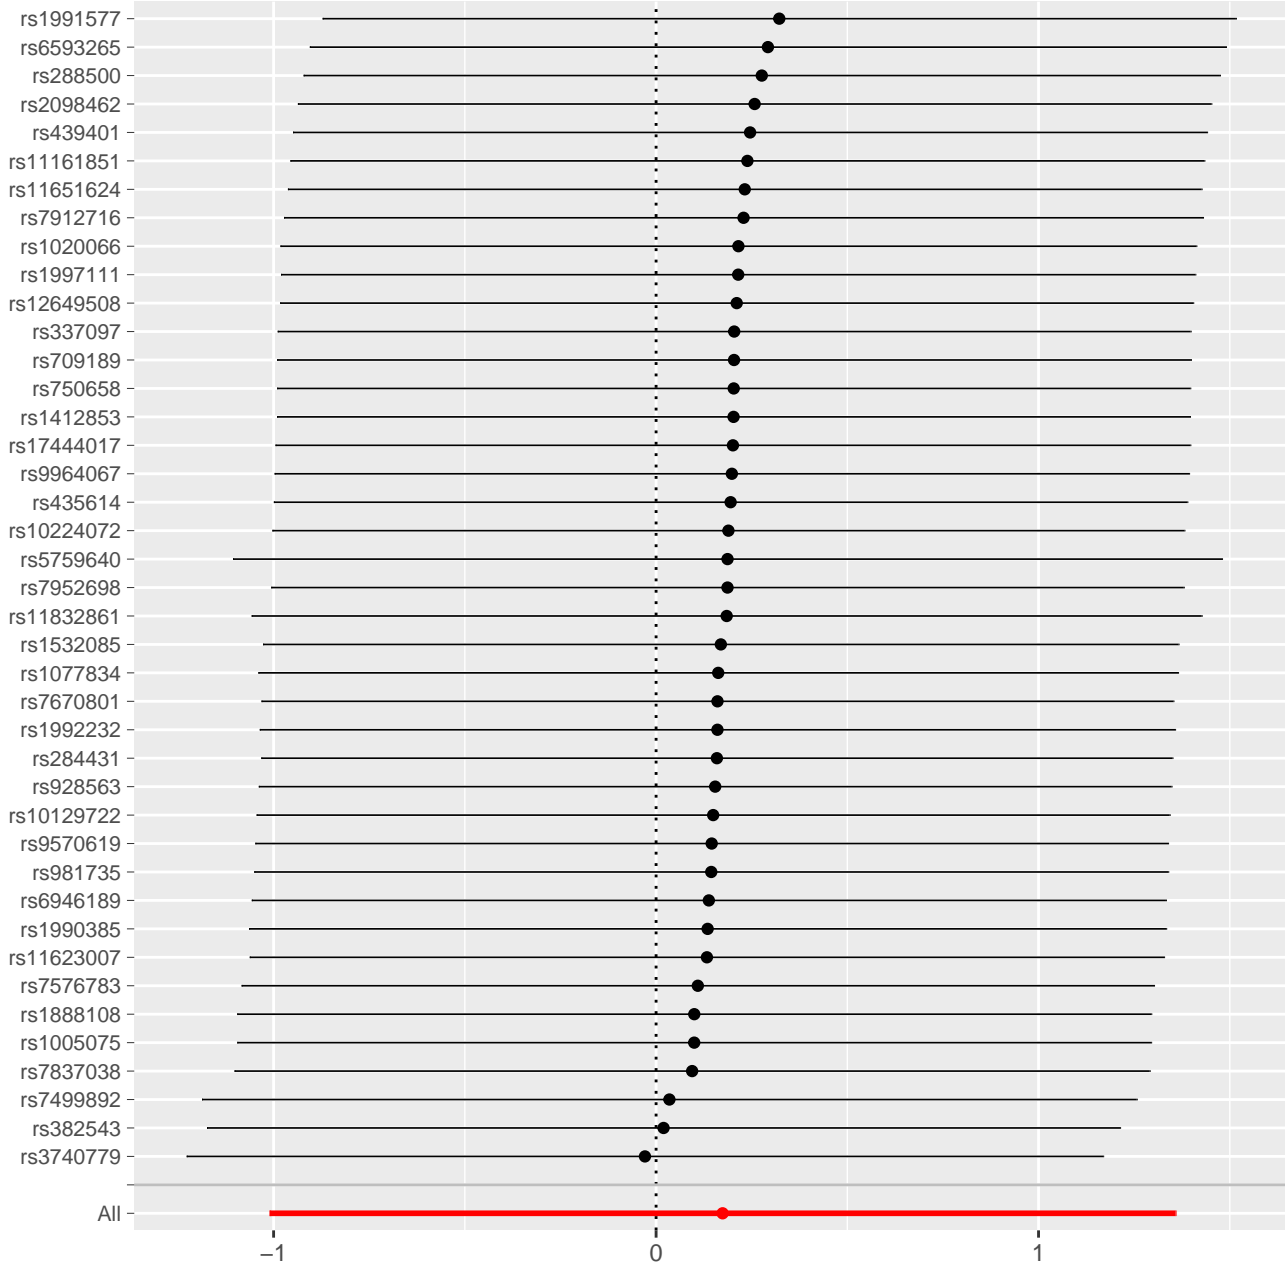

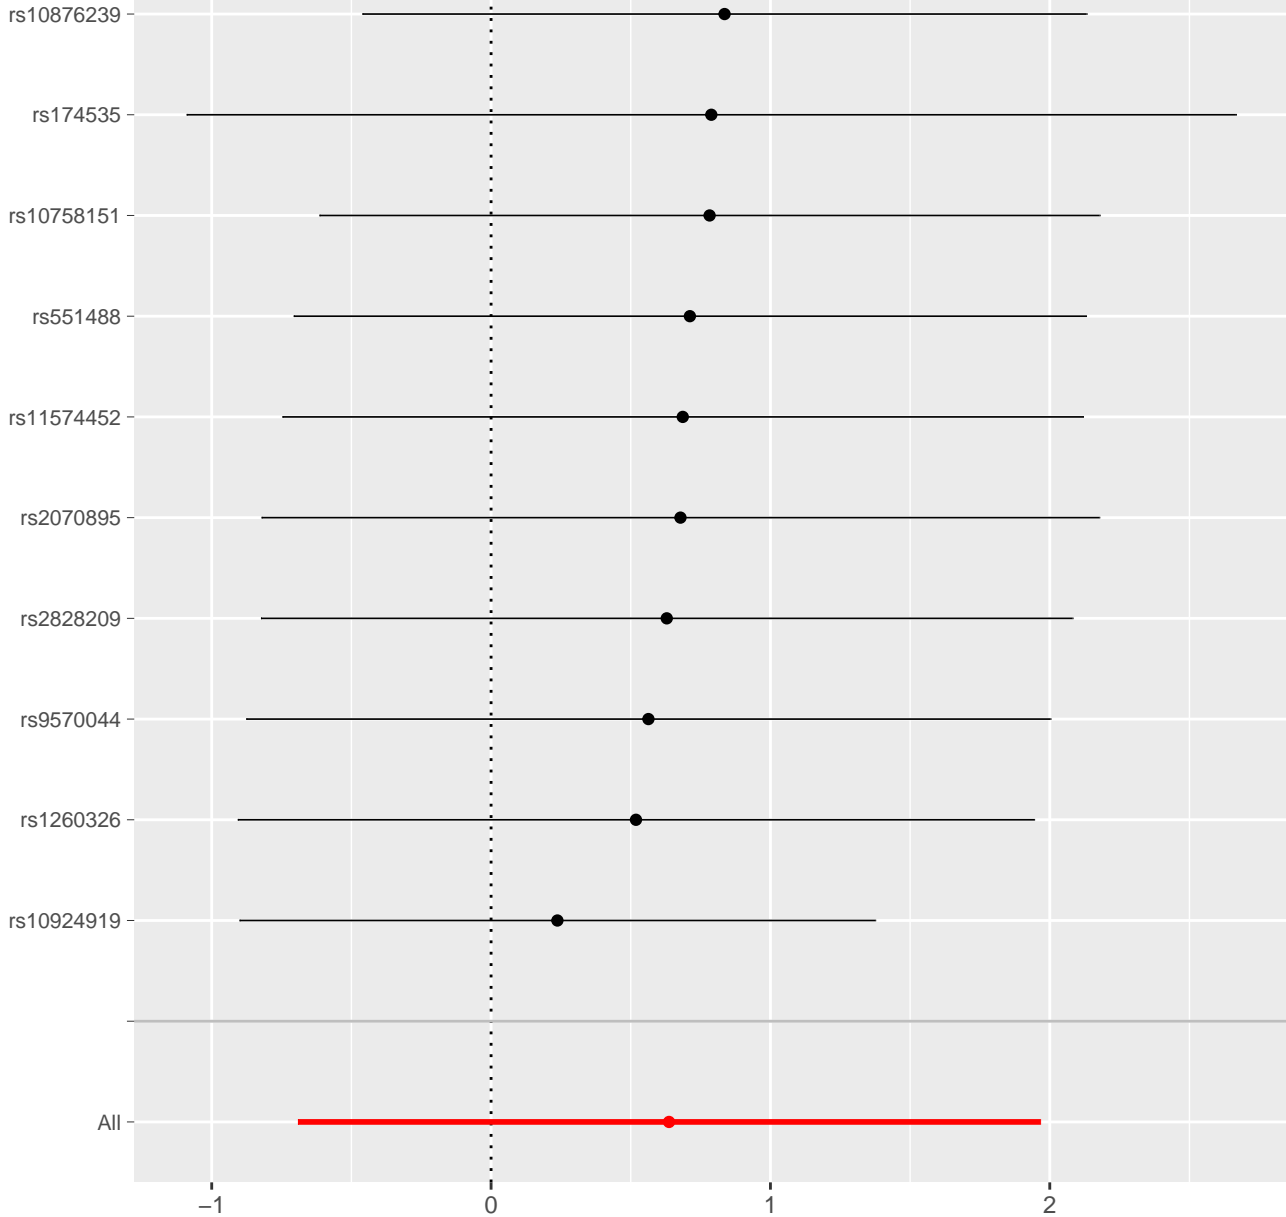

MR leave-one-out sensitivity analysis for 'M32635.metal.pos.txt.gz' on 'JUVEN\_ARTHR.gz'

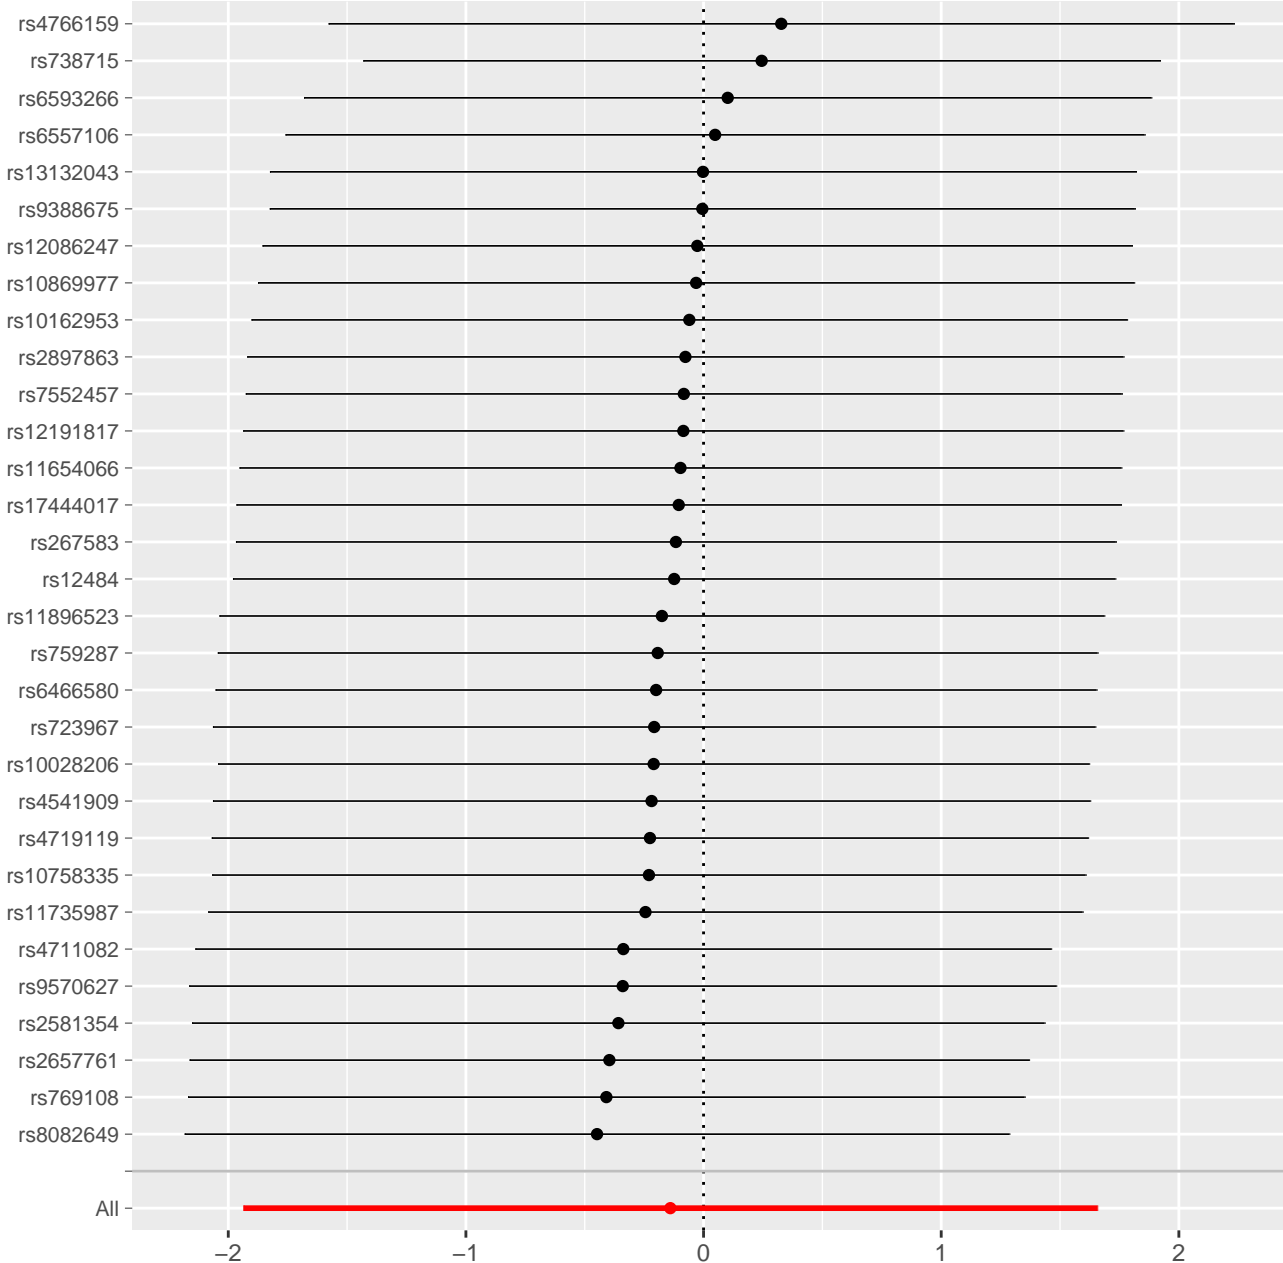

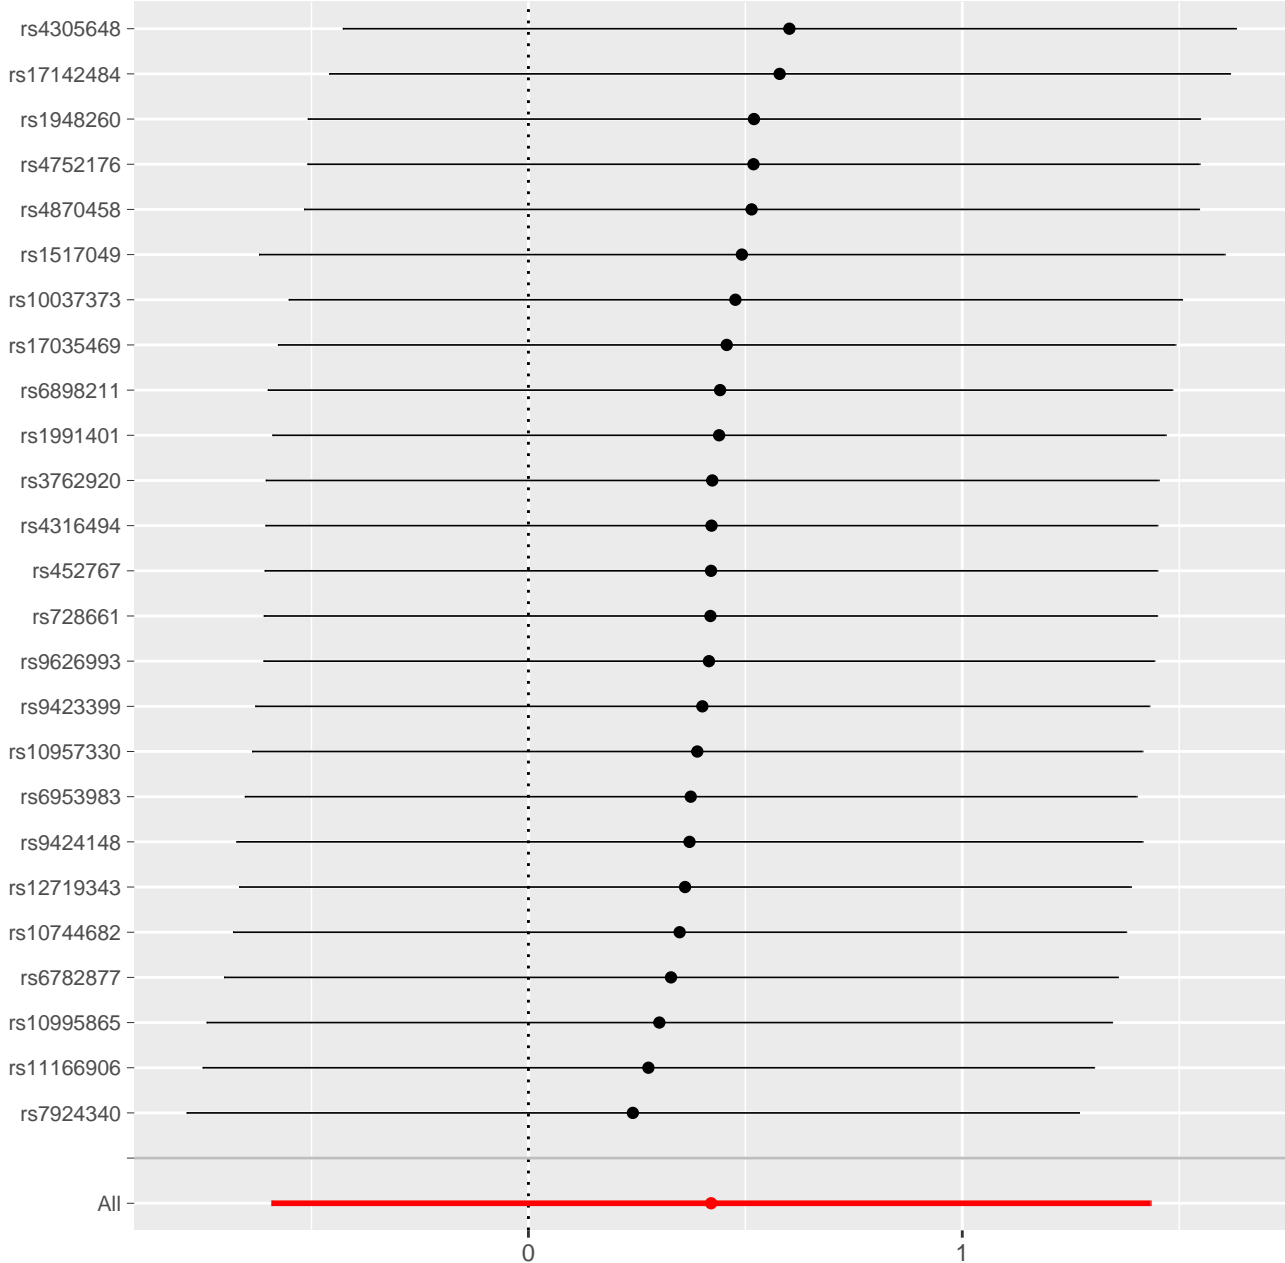

MR leave-one-out sensitivity analysis for 'M32651.metal.pos.txt.gz' on 'JUVEN\_ARTHR.gz'

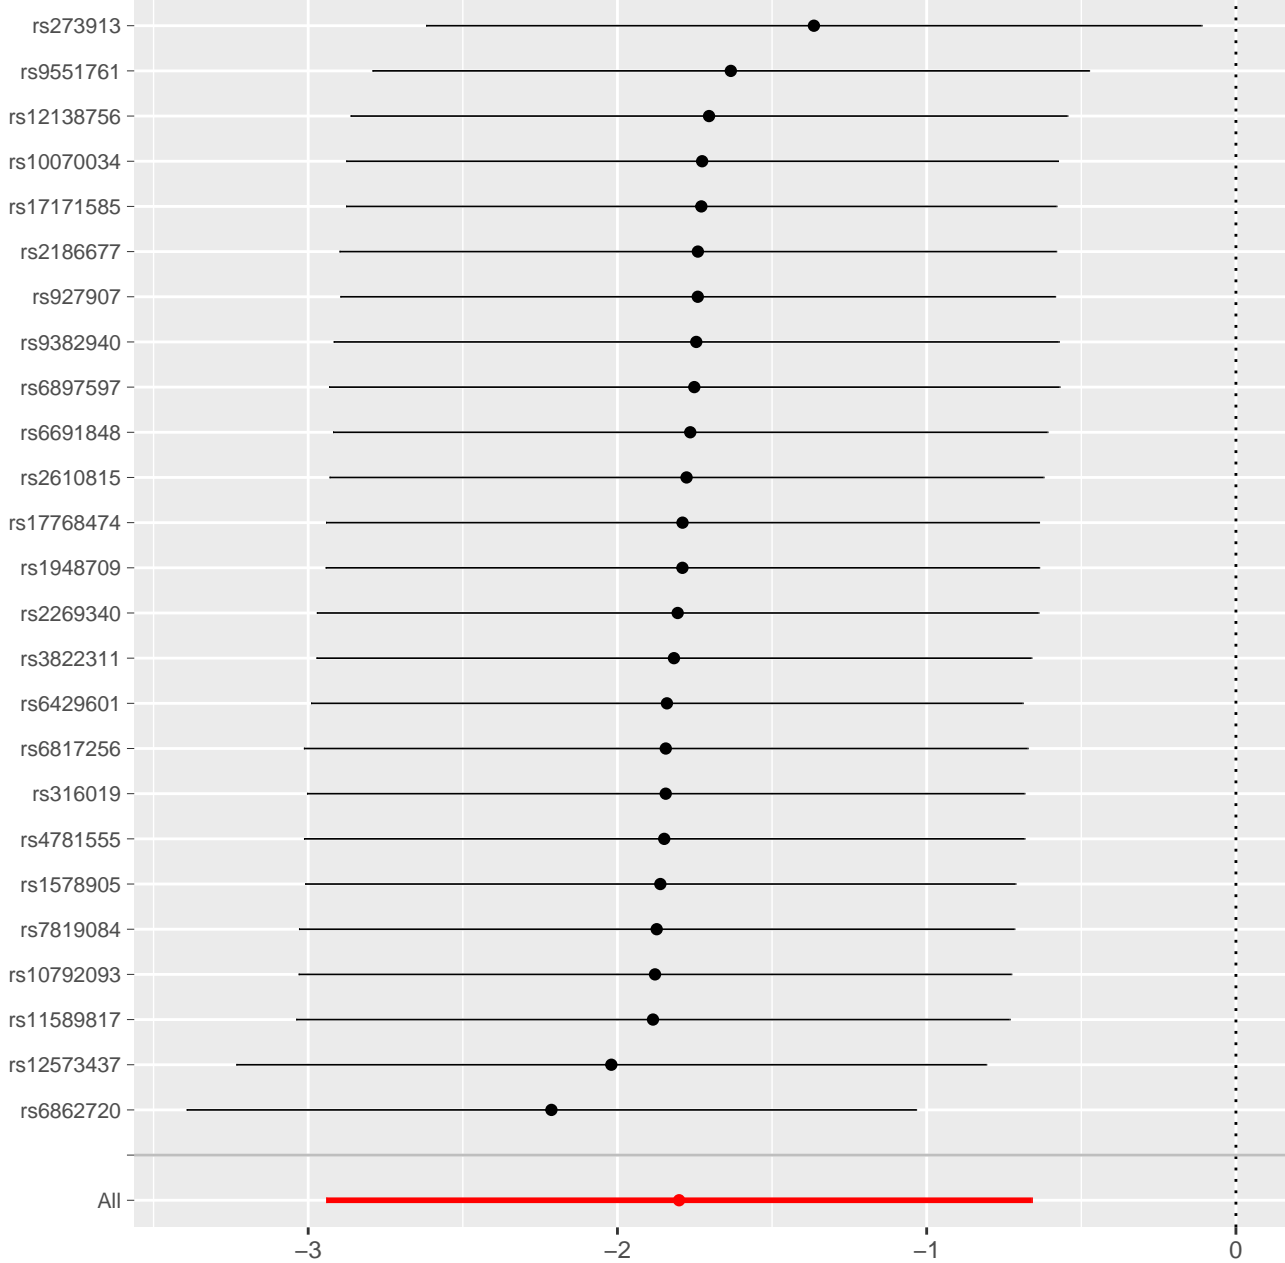

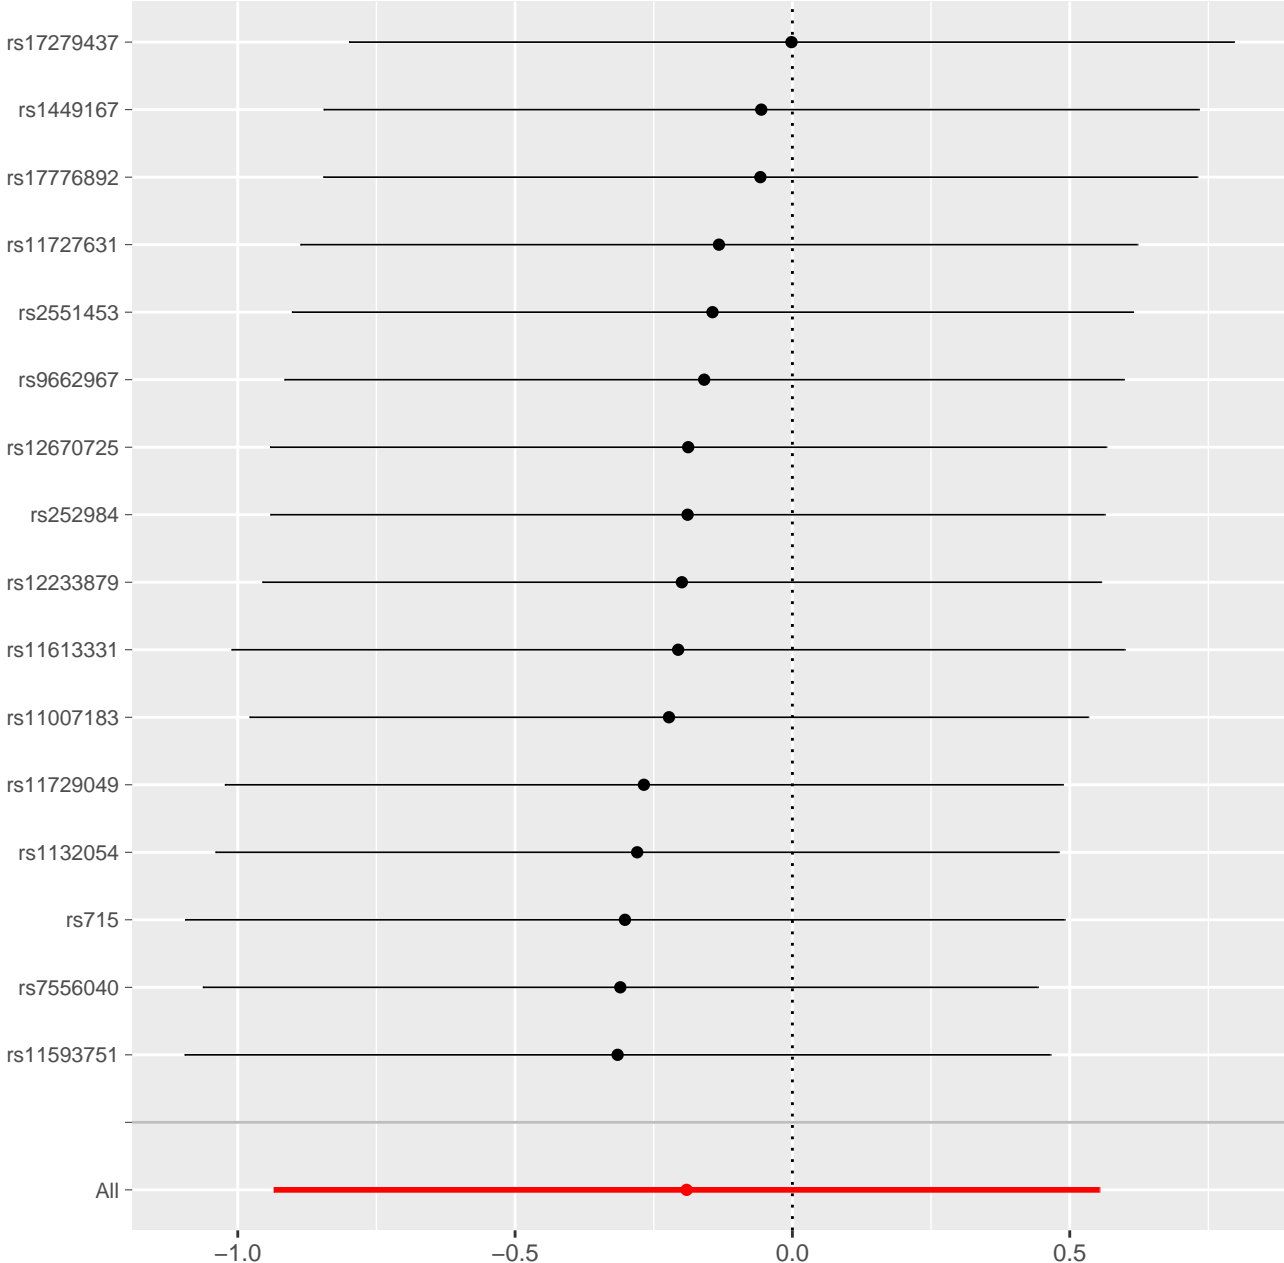

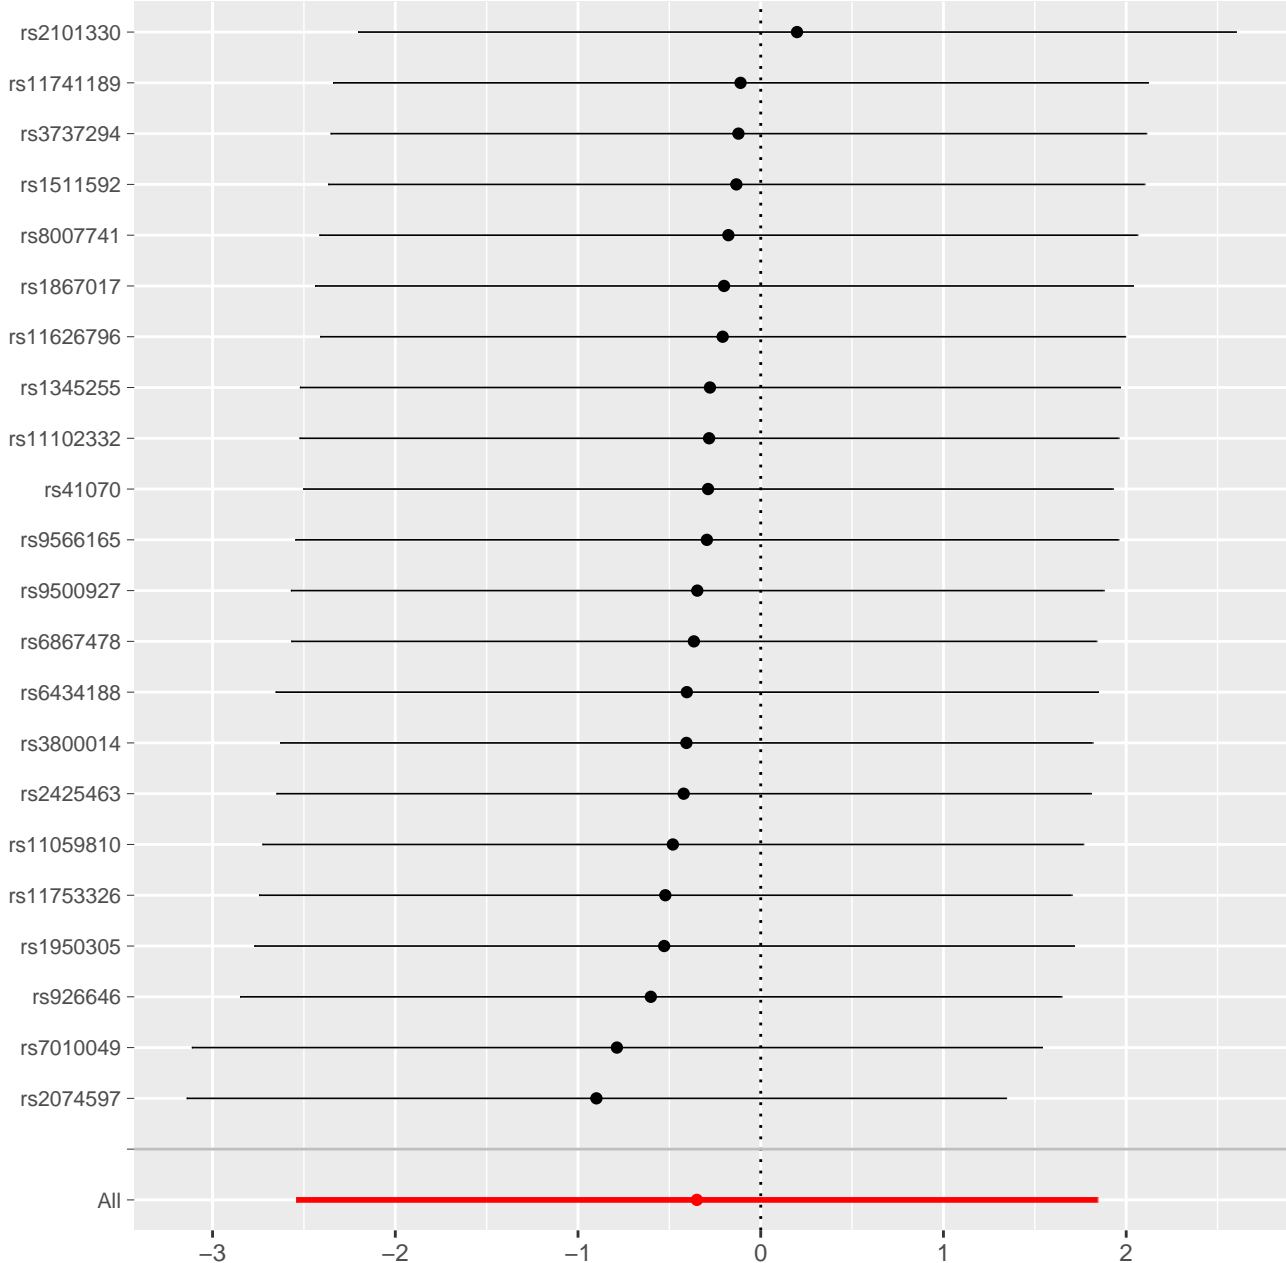

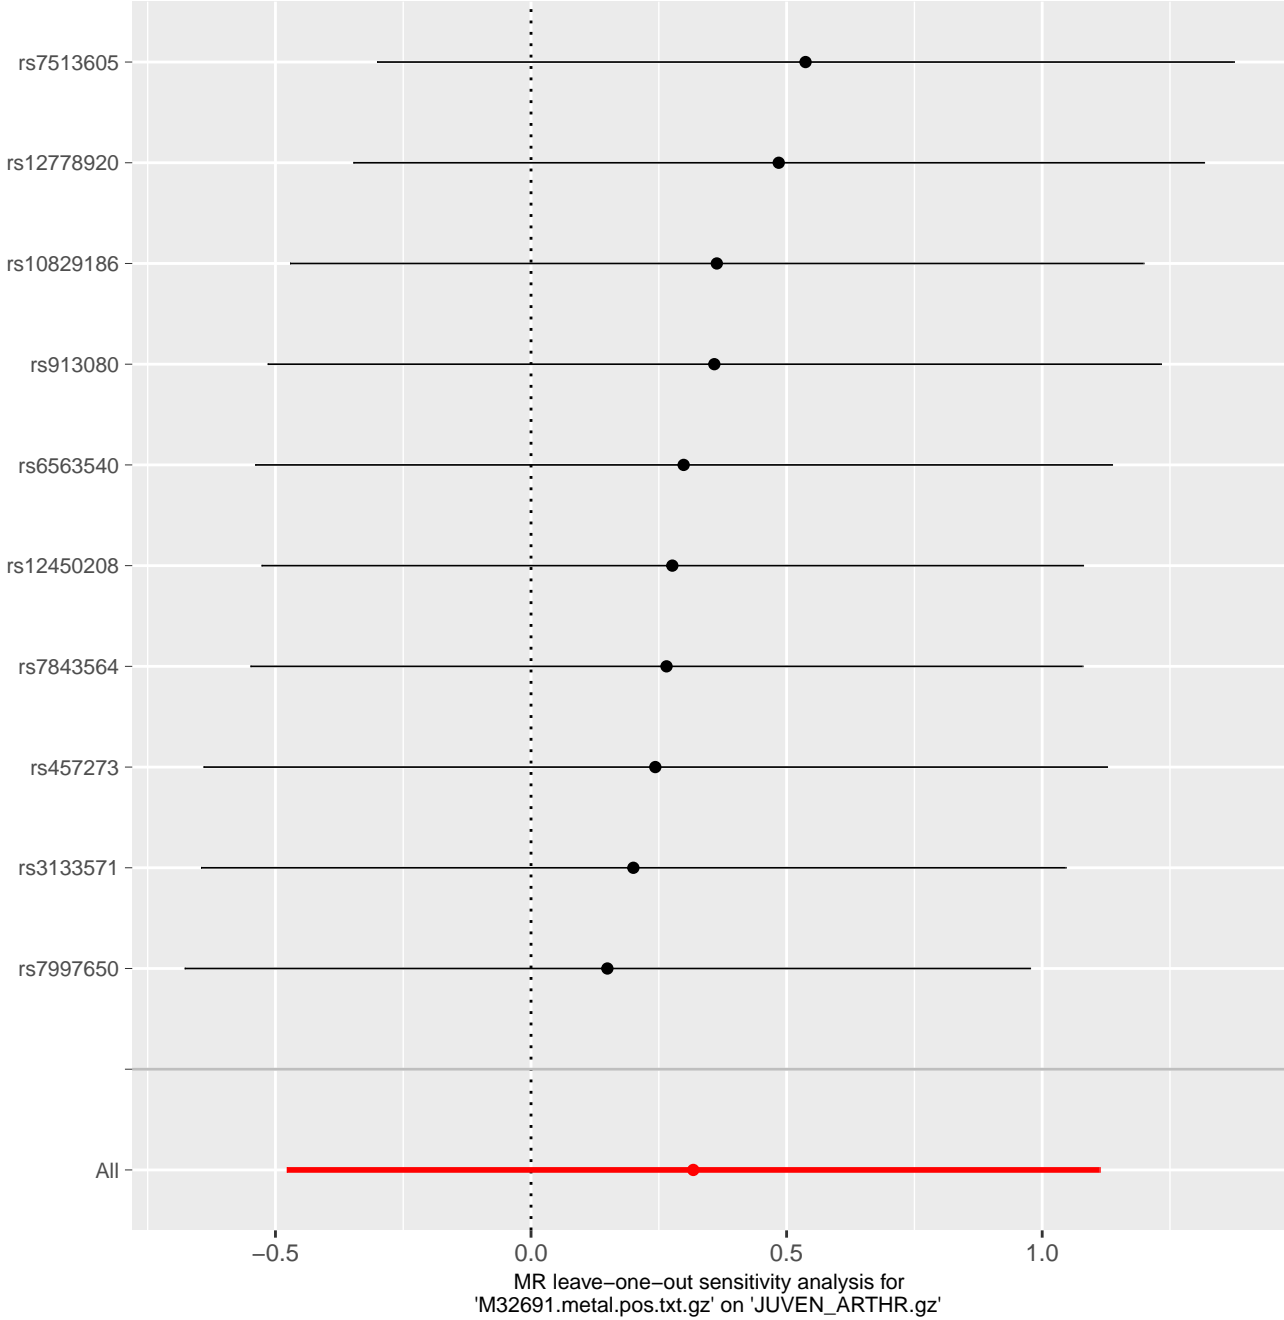



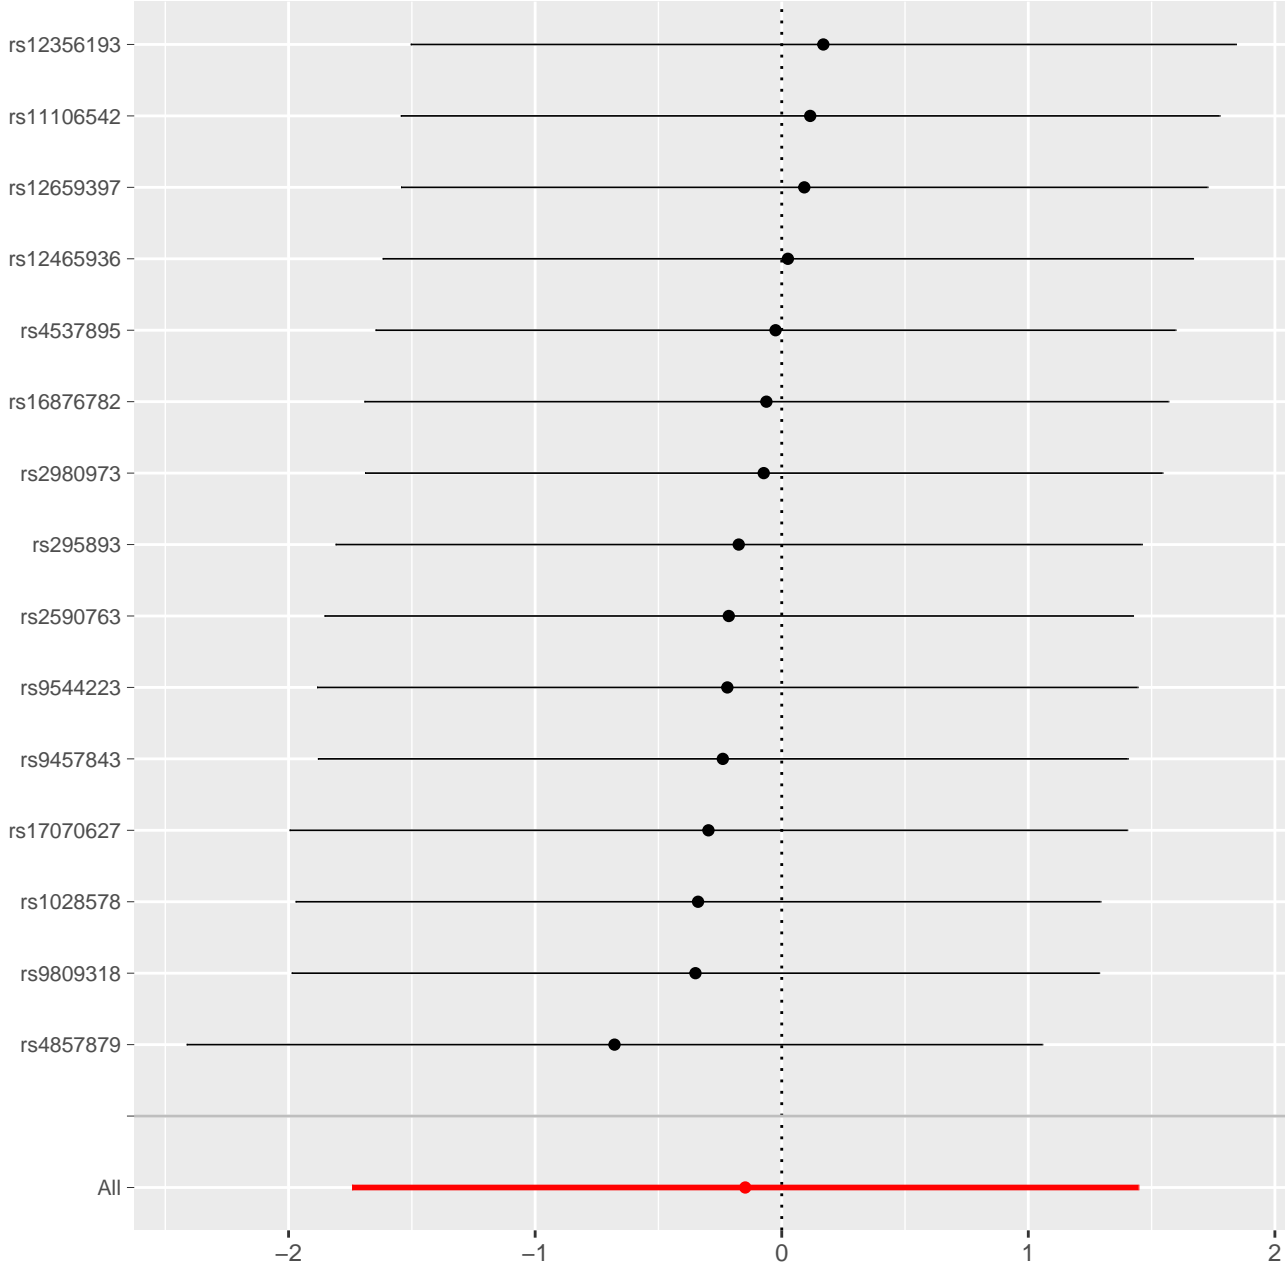

MR leave-one-out sensitivity analysis for 'M32698.metal.pos.txt.gz' on 'JUVEN\_ARTHR.gz'

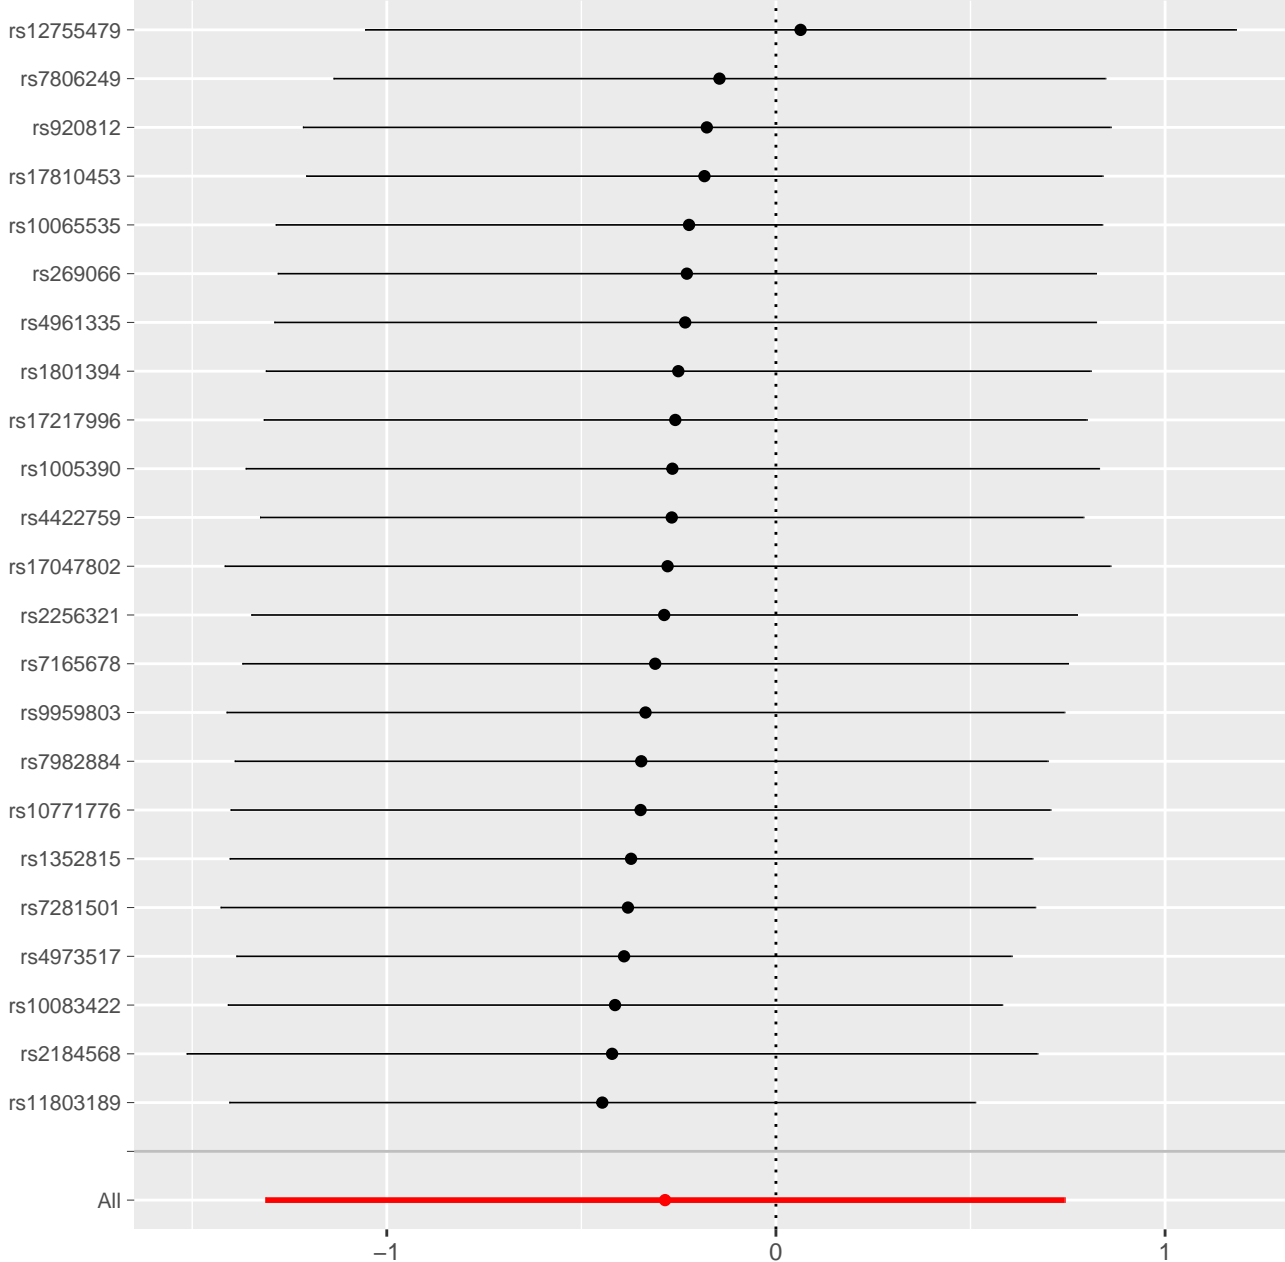

MR leave-one-out sensitivity analysis for 'M32709.metal.pos.txt.gz' on 'JUVEN\_ARTHR.gz'

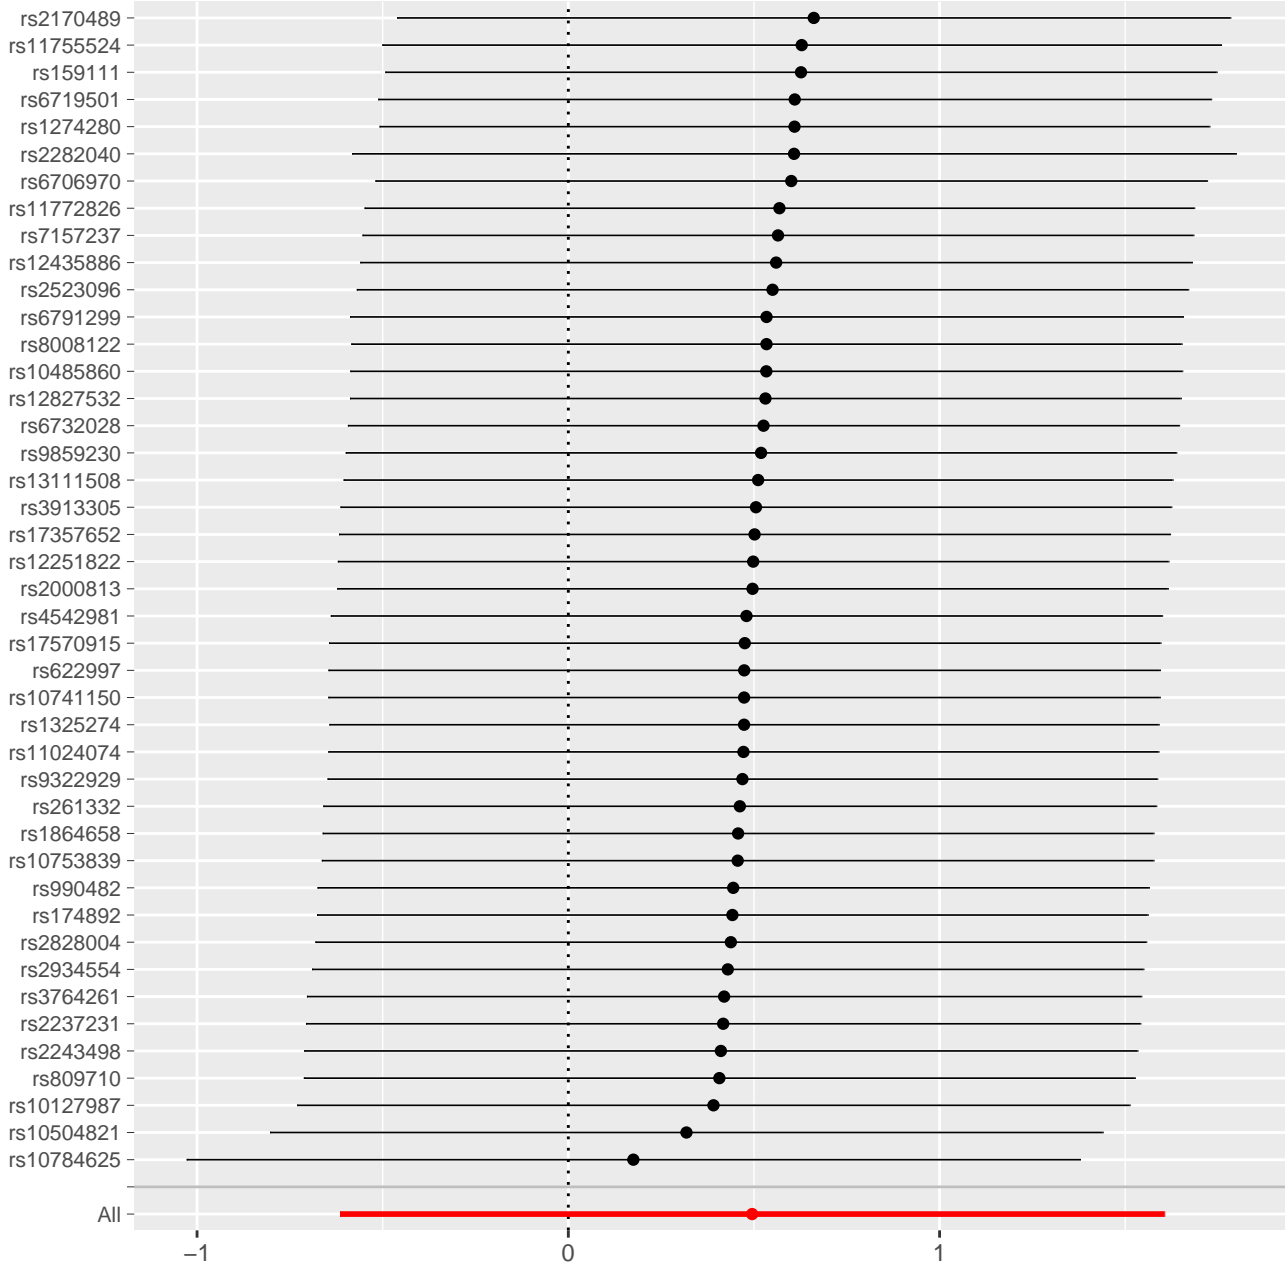

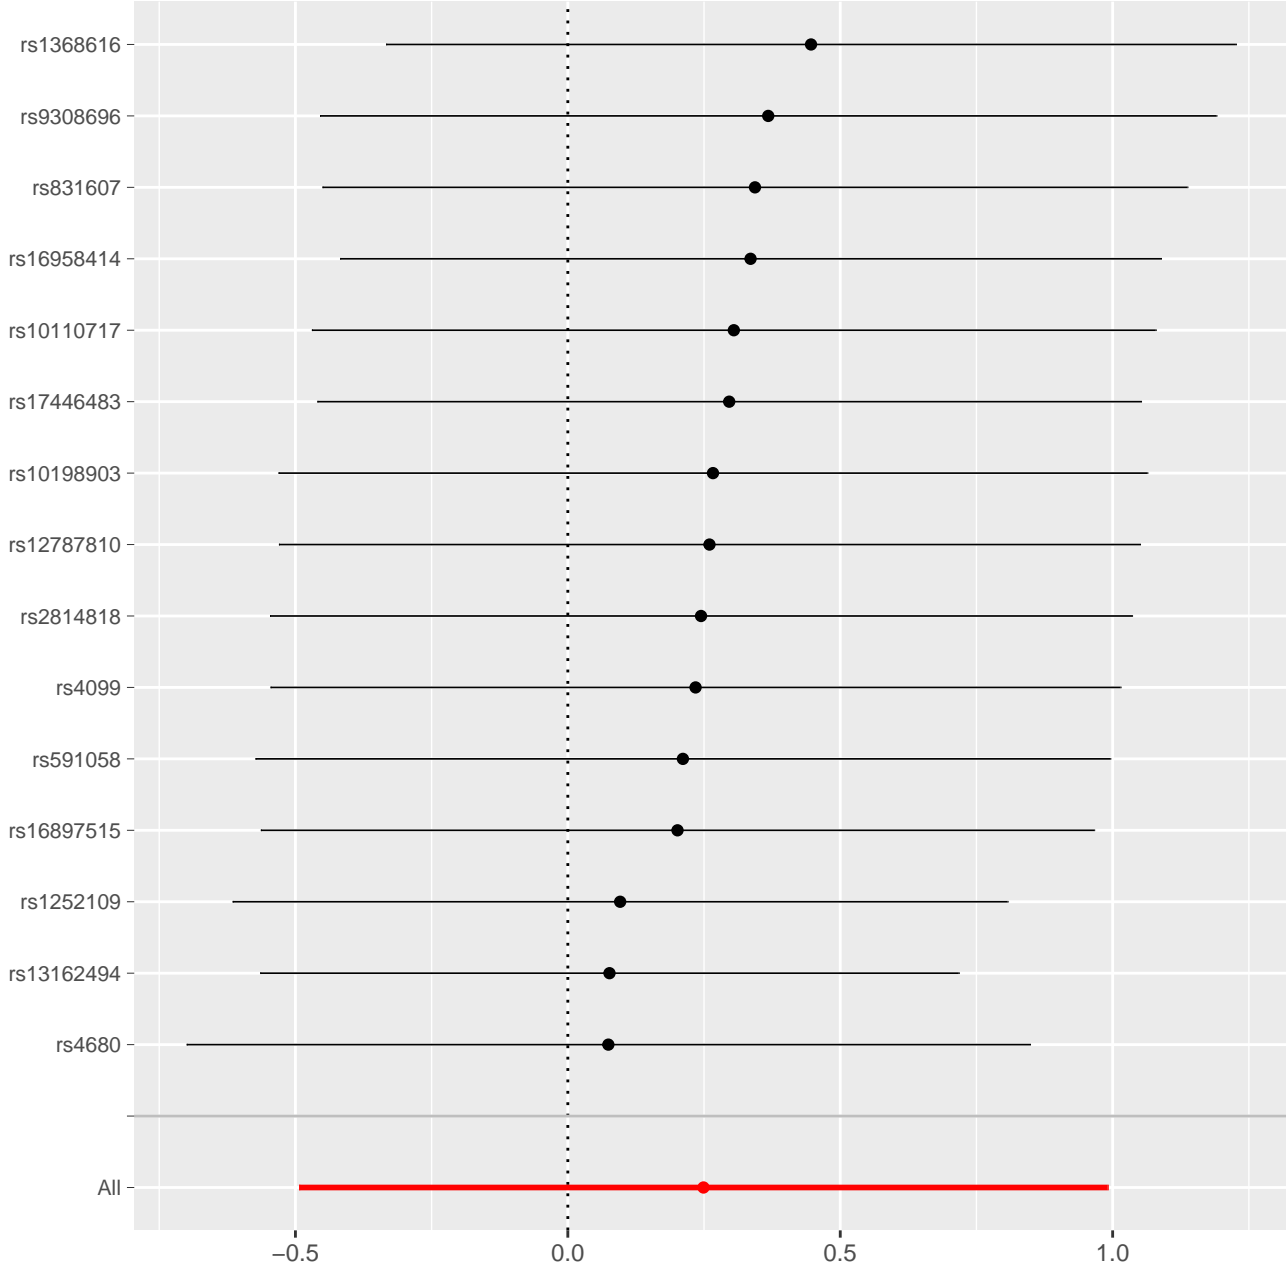

MR leave-one-out sensitivity analysis for 'M32735.metal.pos.txt.gz' on 'JUVEN\_ARTHR.gz'

rs7946041

rs10750719

rs12617815

rs12357763

rs9440550

rs1196661

All

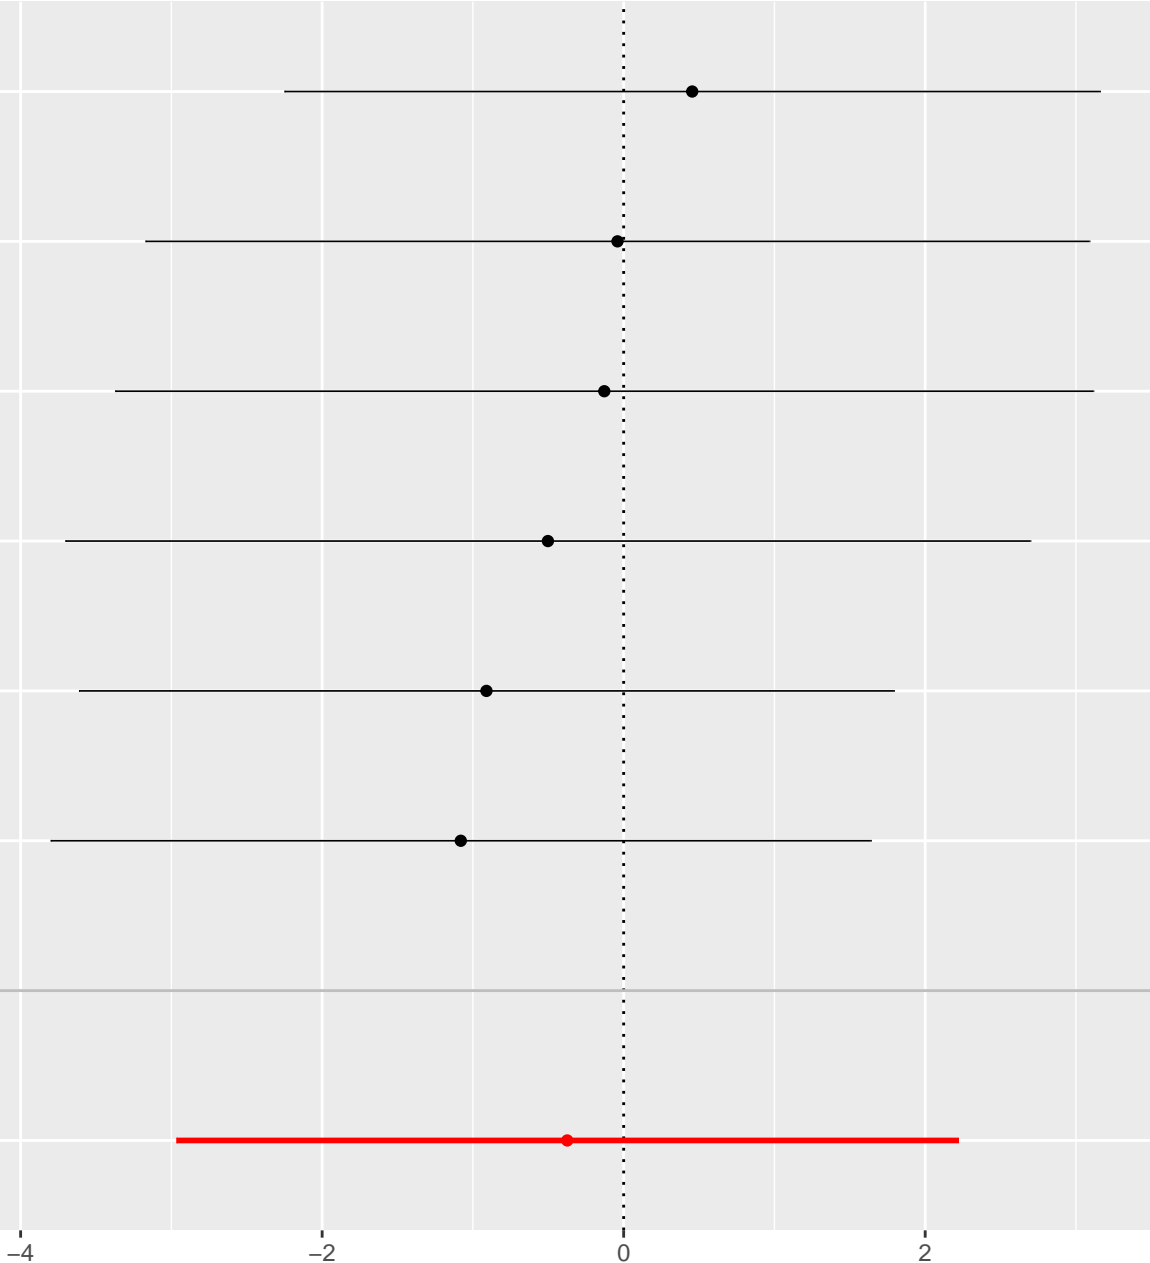

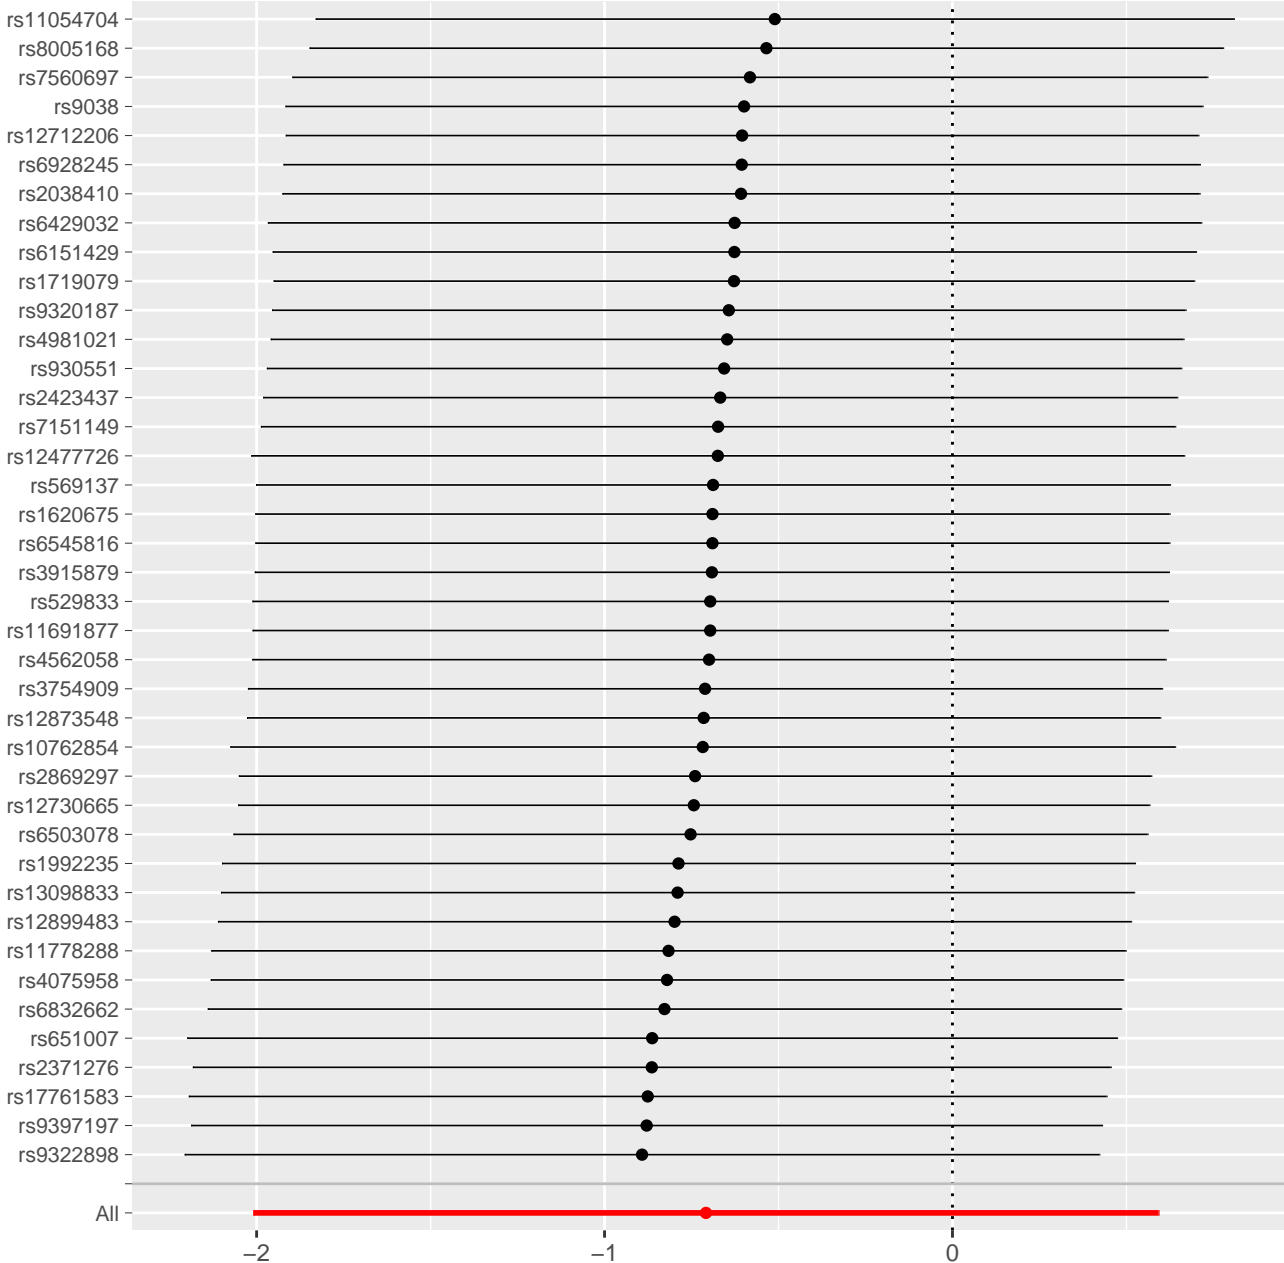

MR leave-one-out sensitivity analysis for 'M32740.metal.pos.txt.gz' on 'JUVEN\_ARTHR.gz'

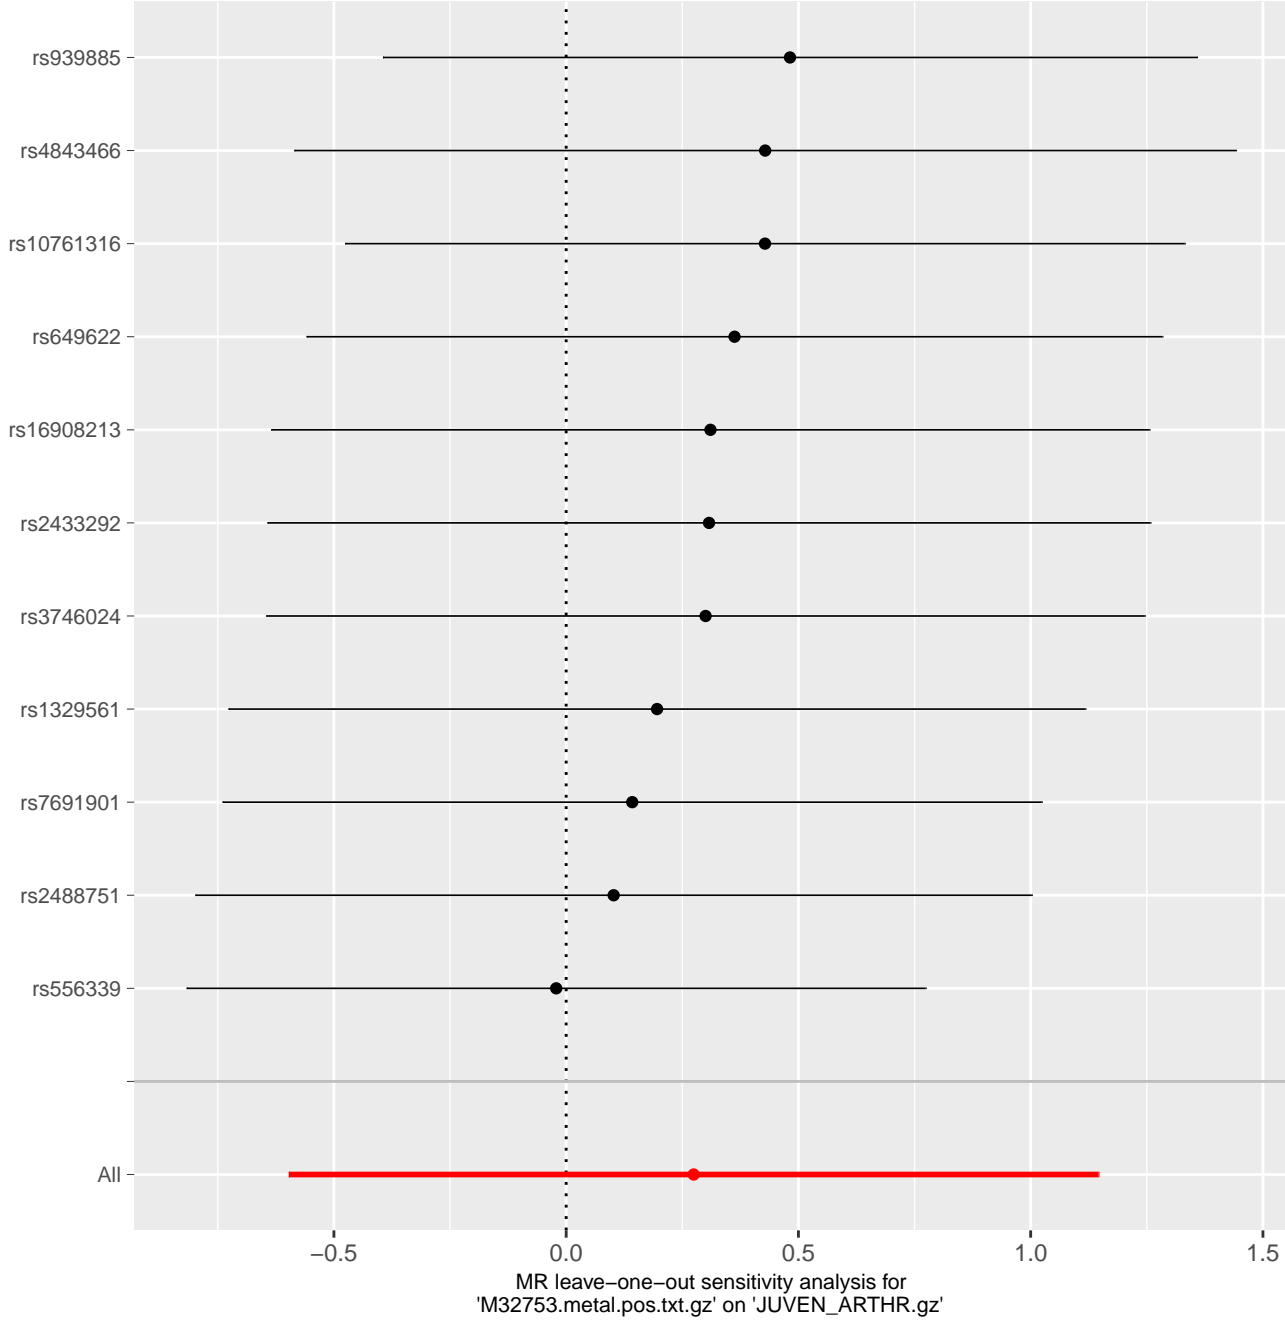

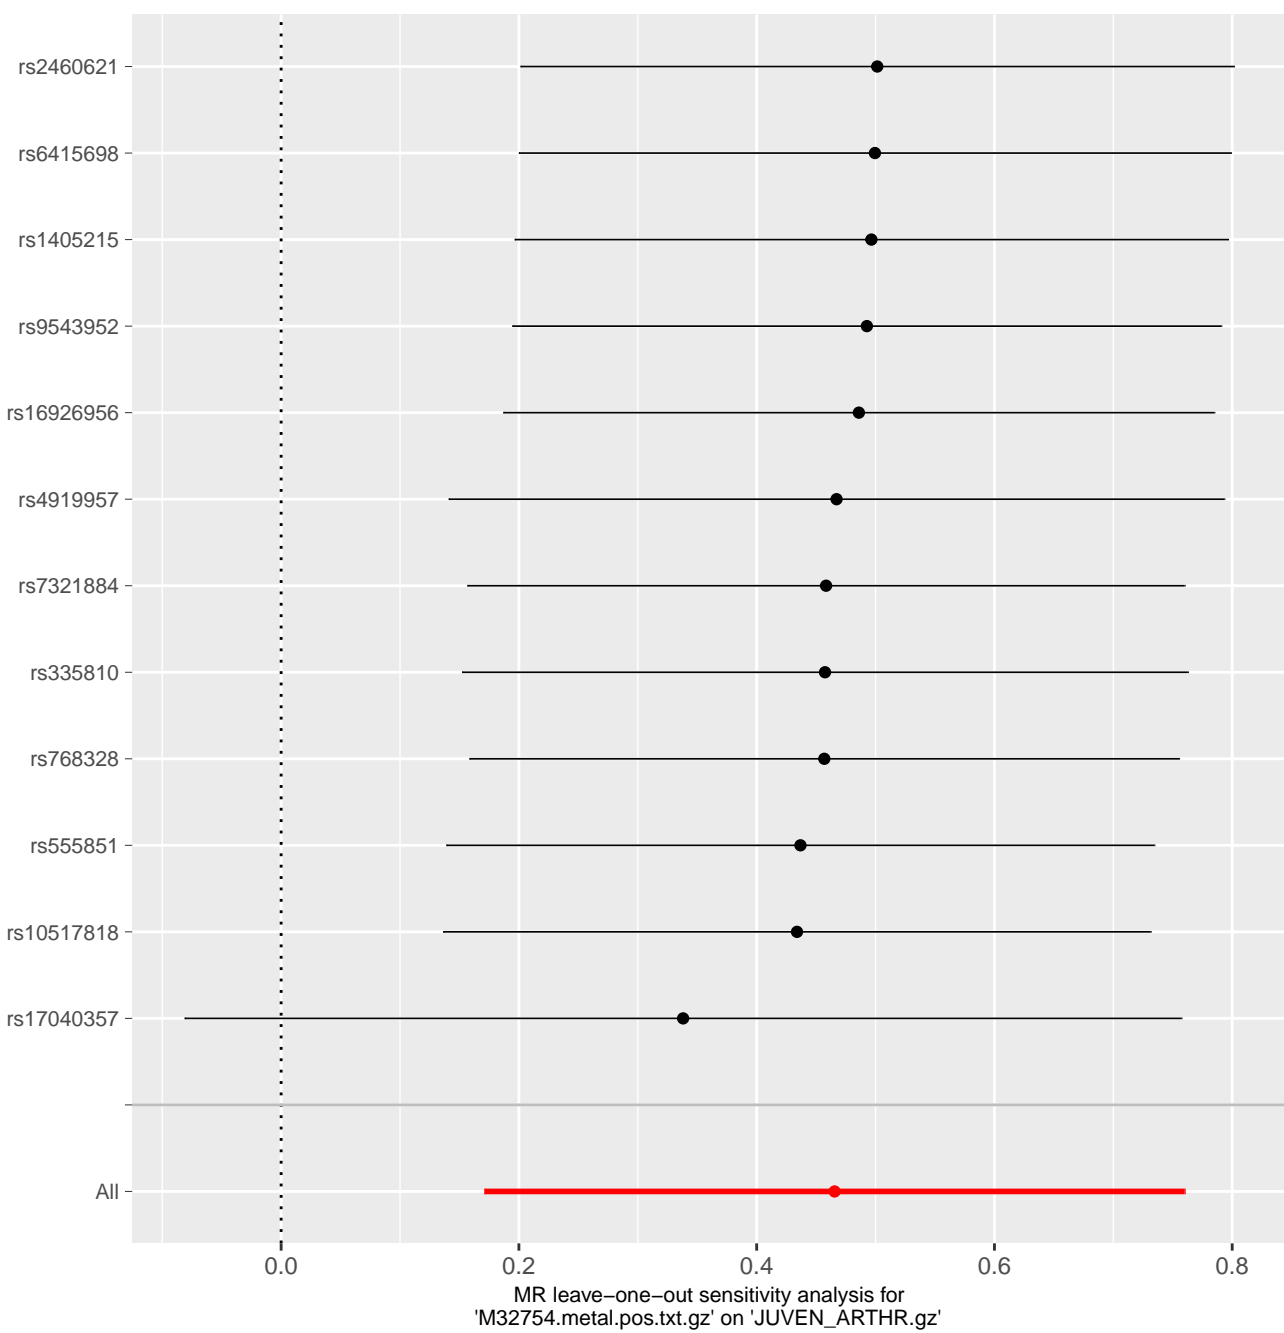



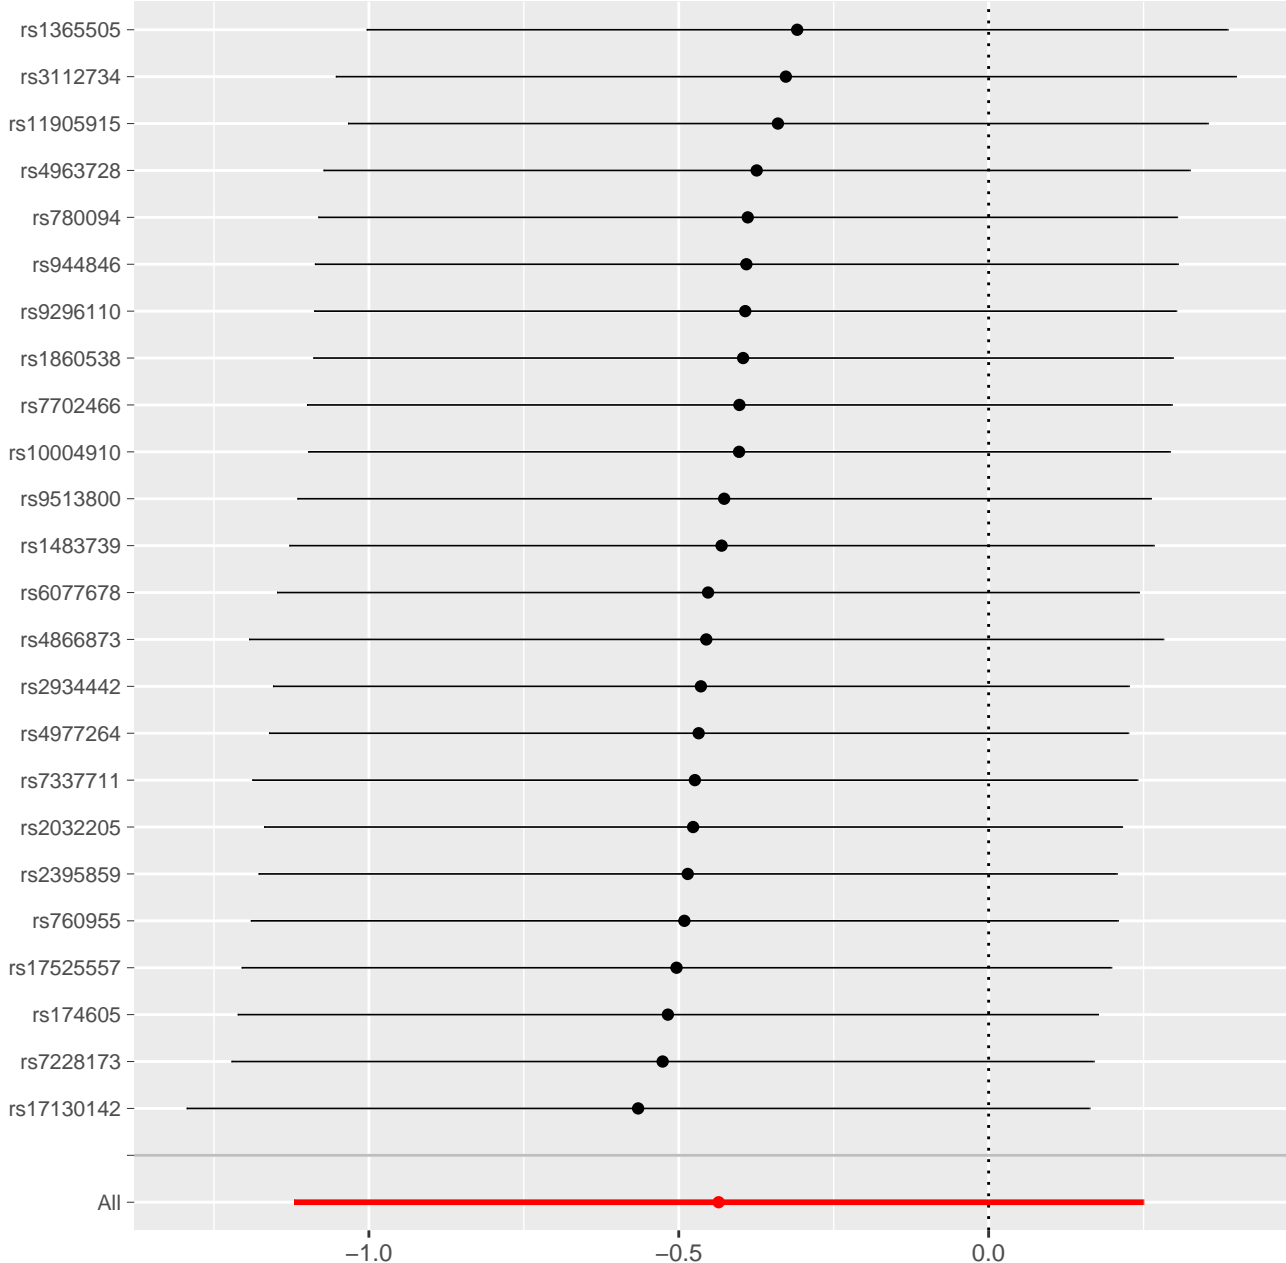

MR leave-one-out sensitivity analysis for 'M32755.metal.pos.txt.gz' on 'JUVEN\_ARTHR.gz'

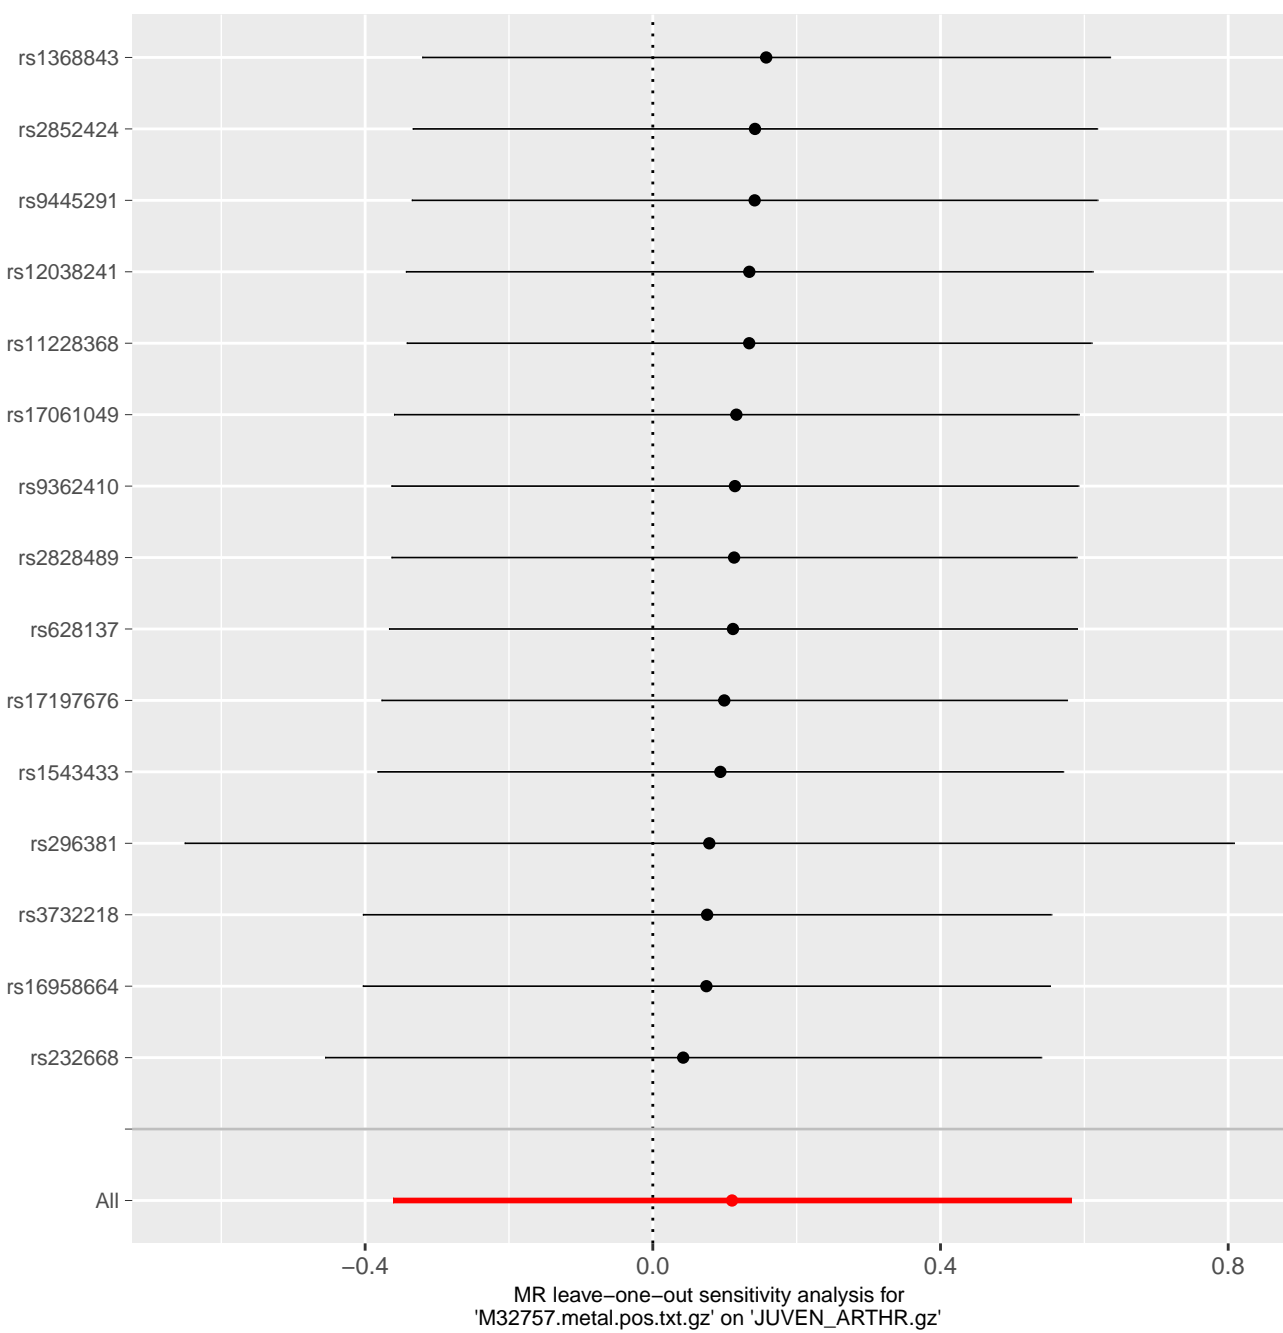

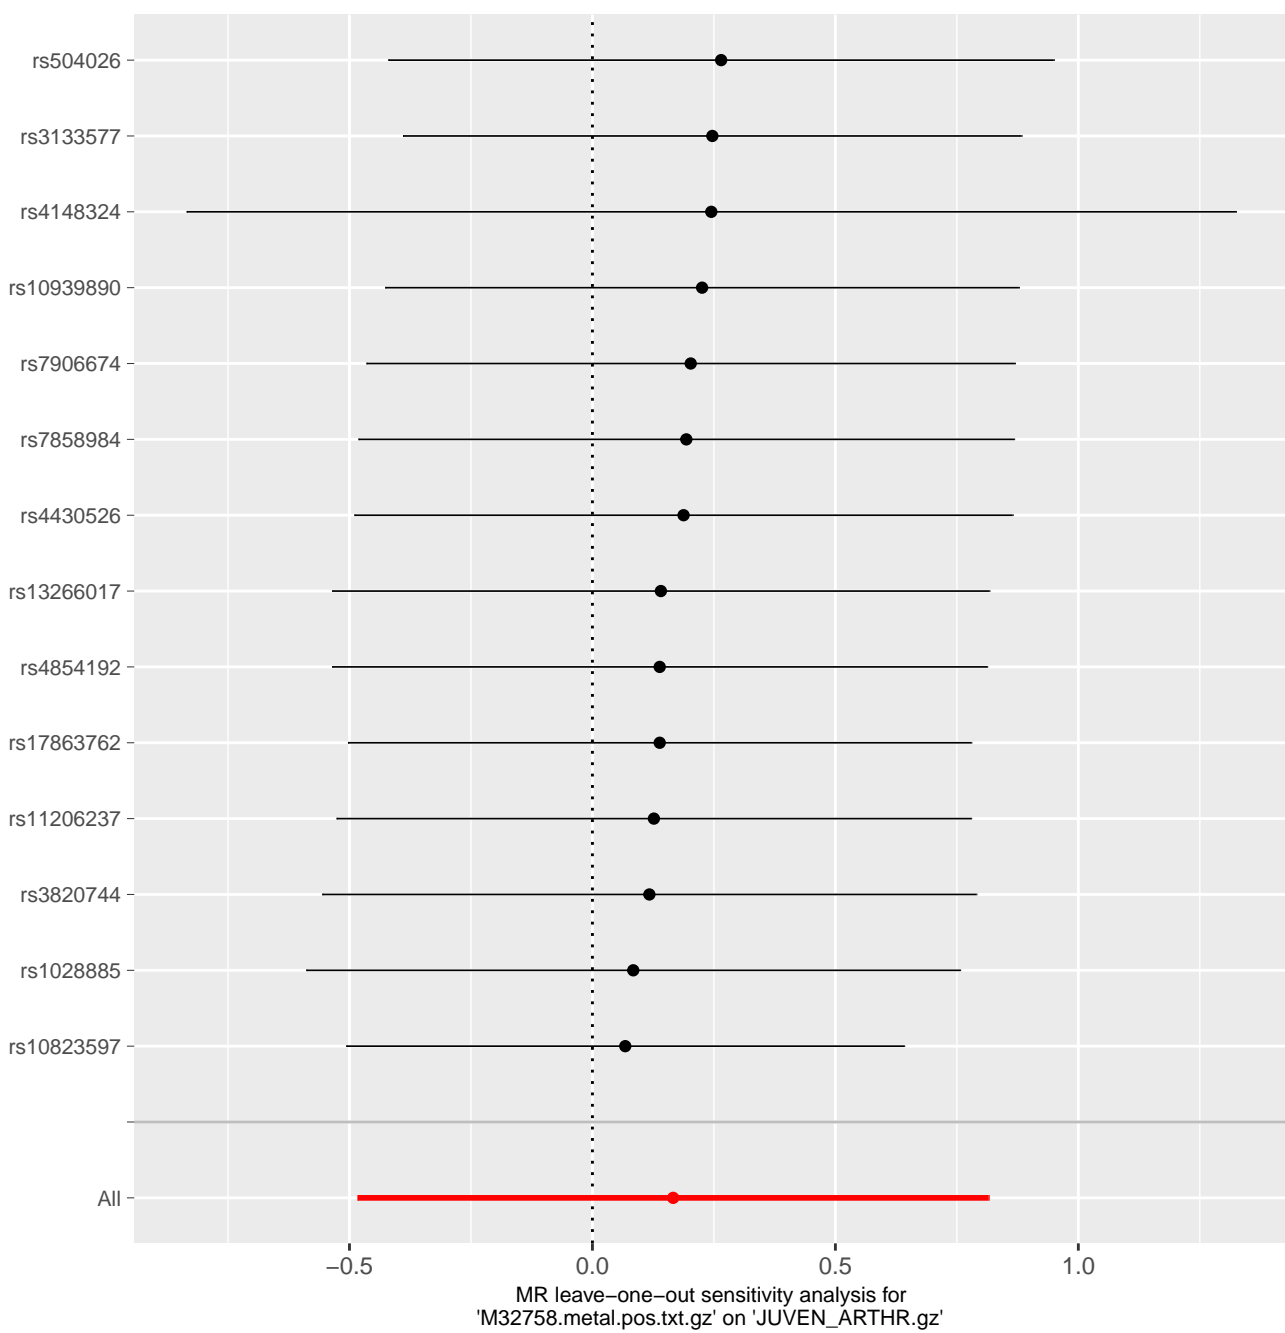

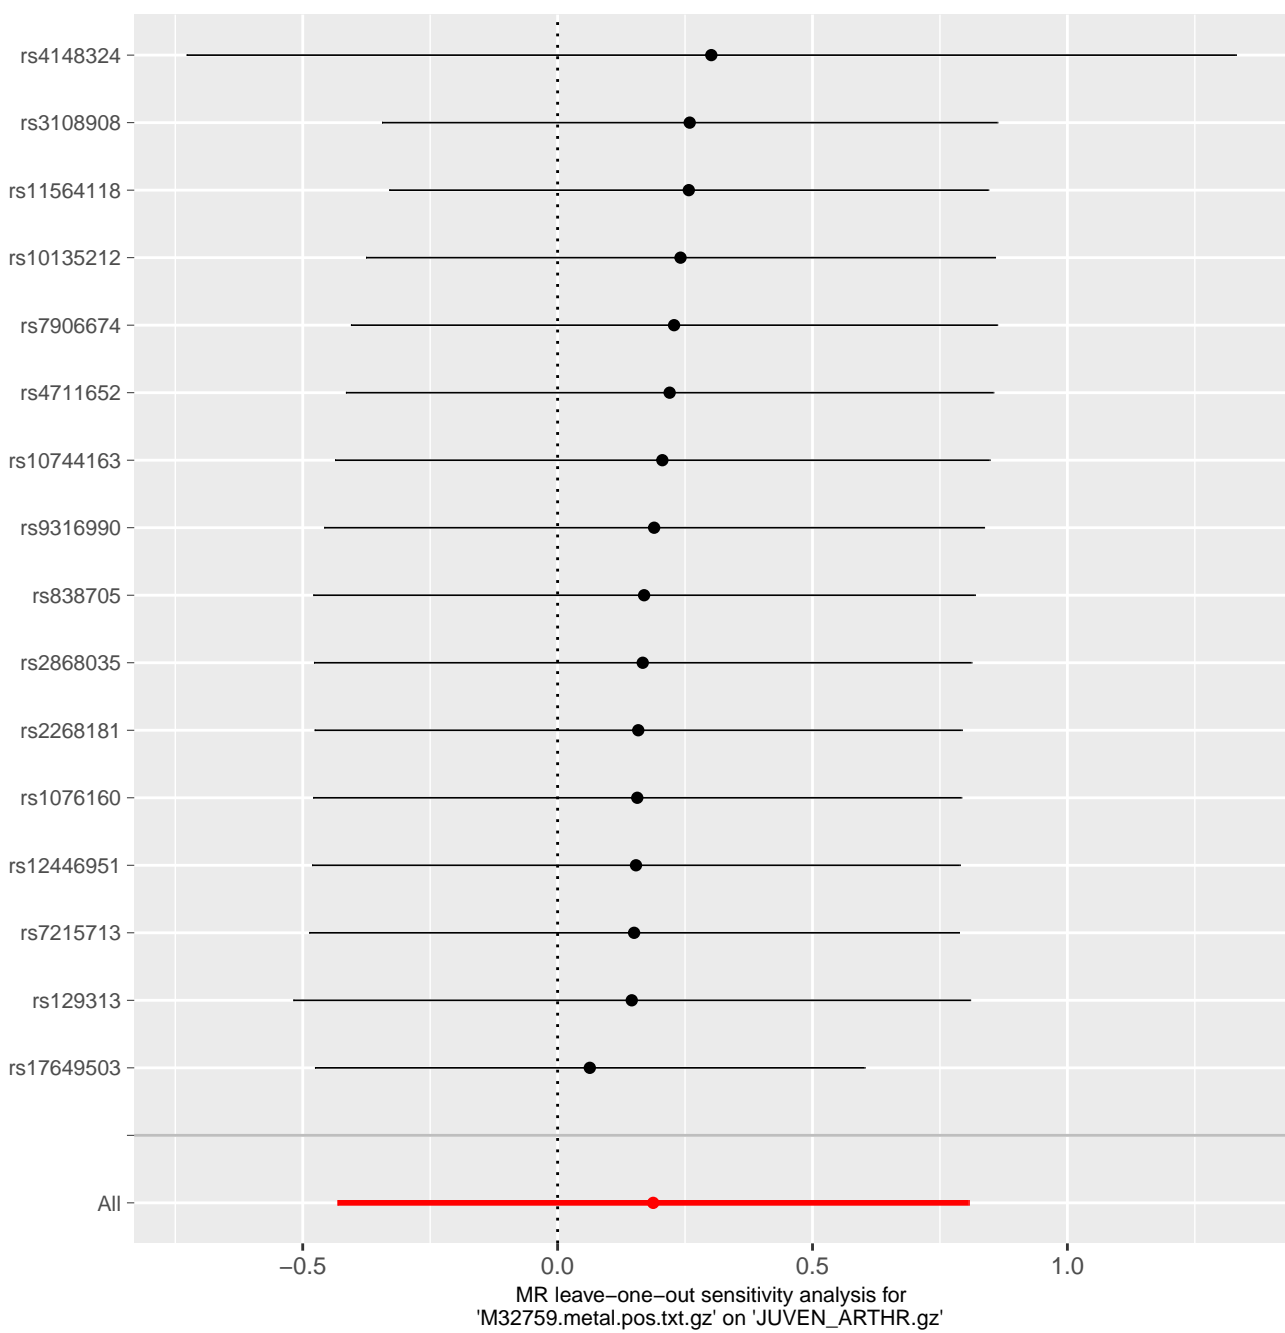

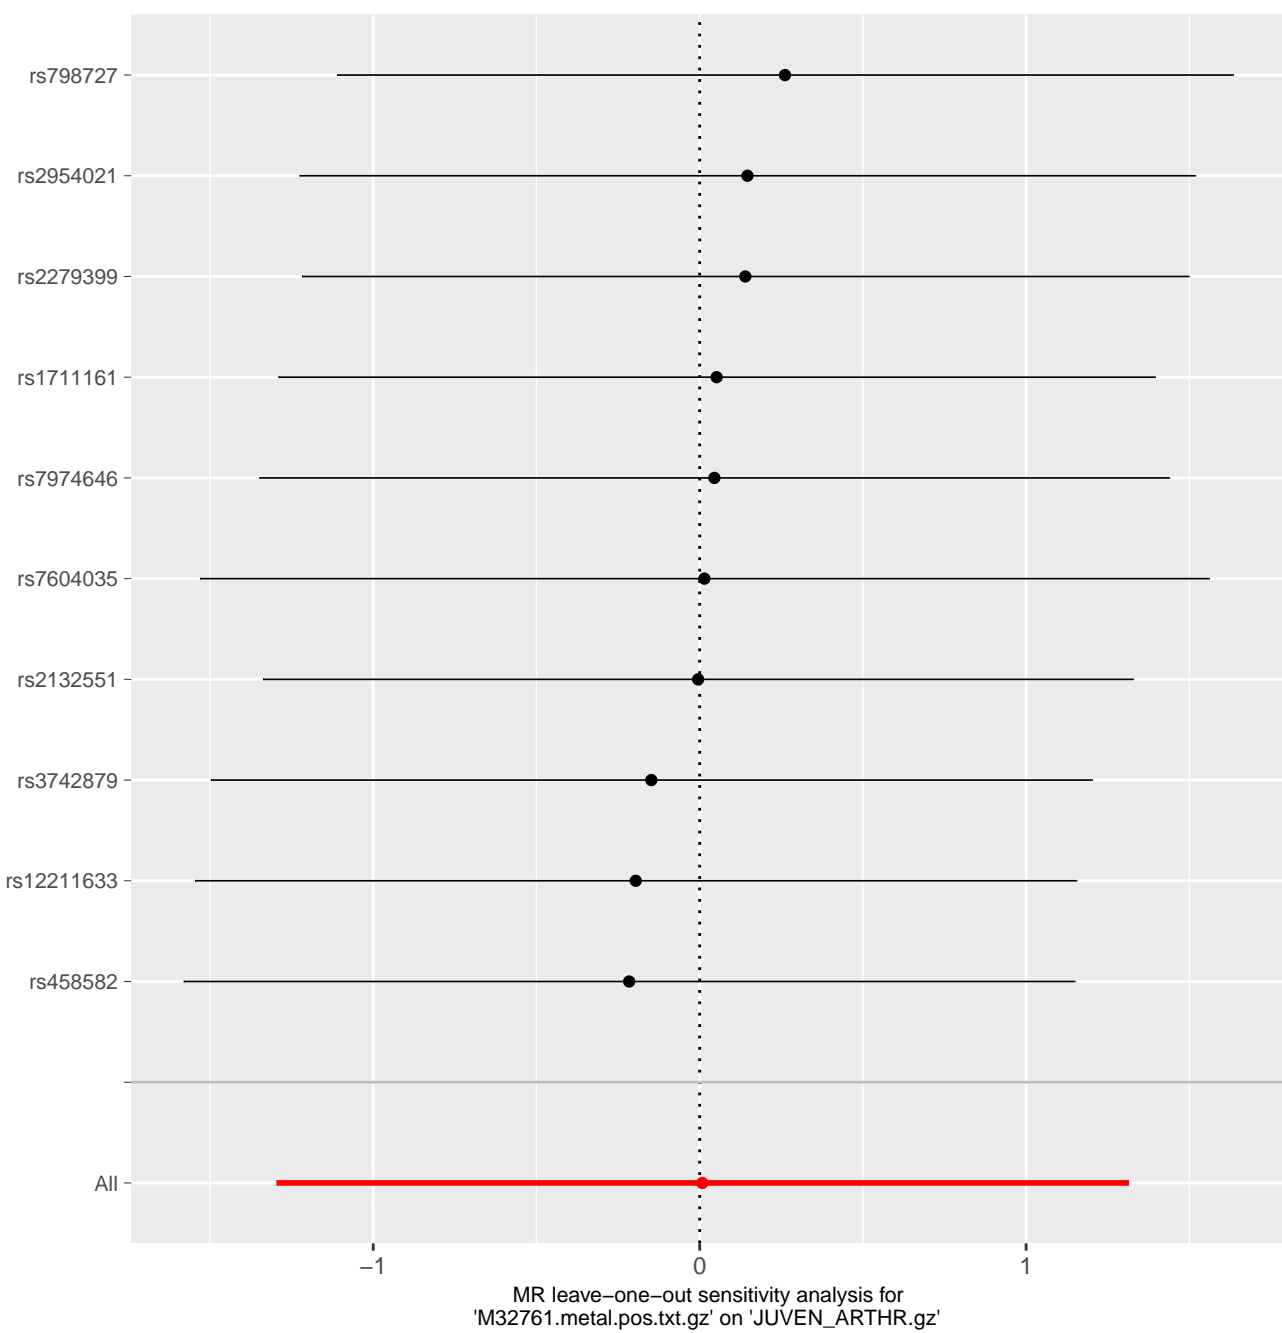

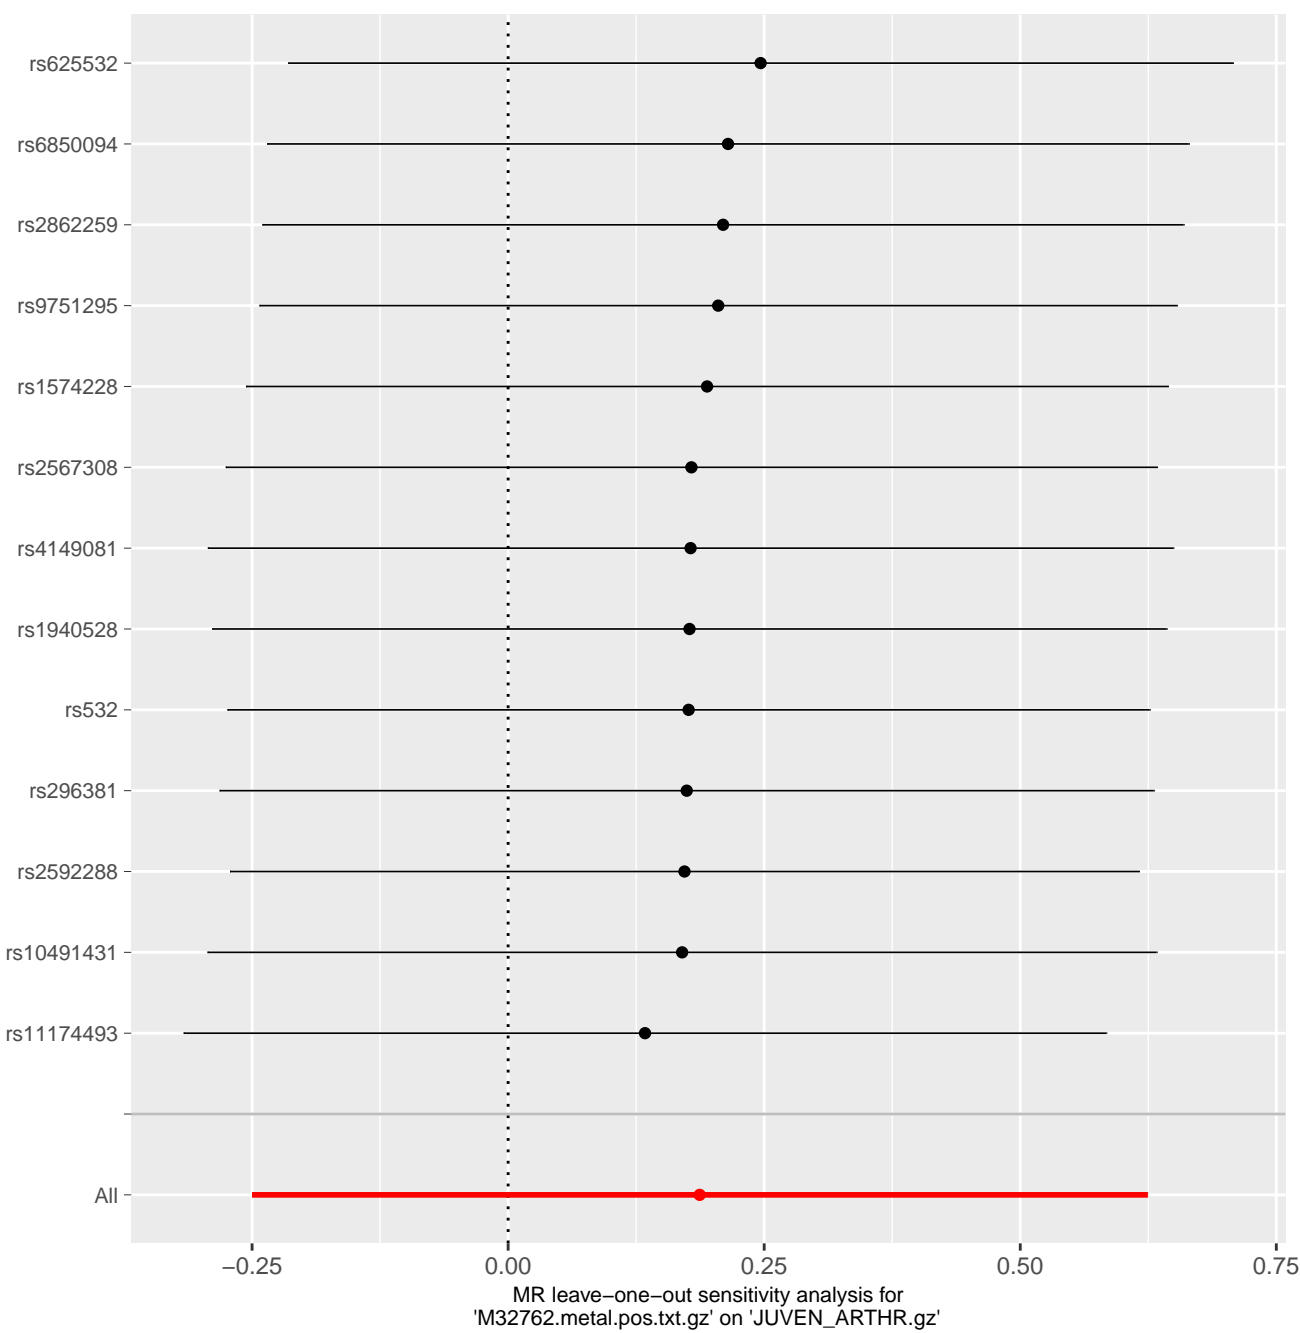

rs1562716

rs4633

rs300250

rs9348689

rs824764

All

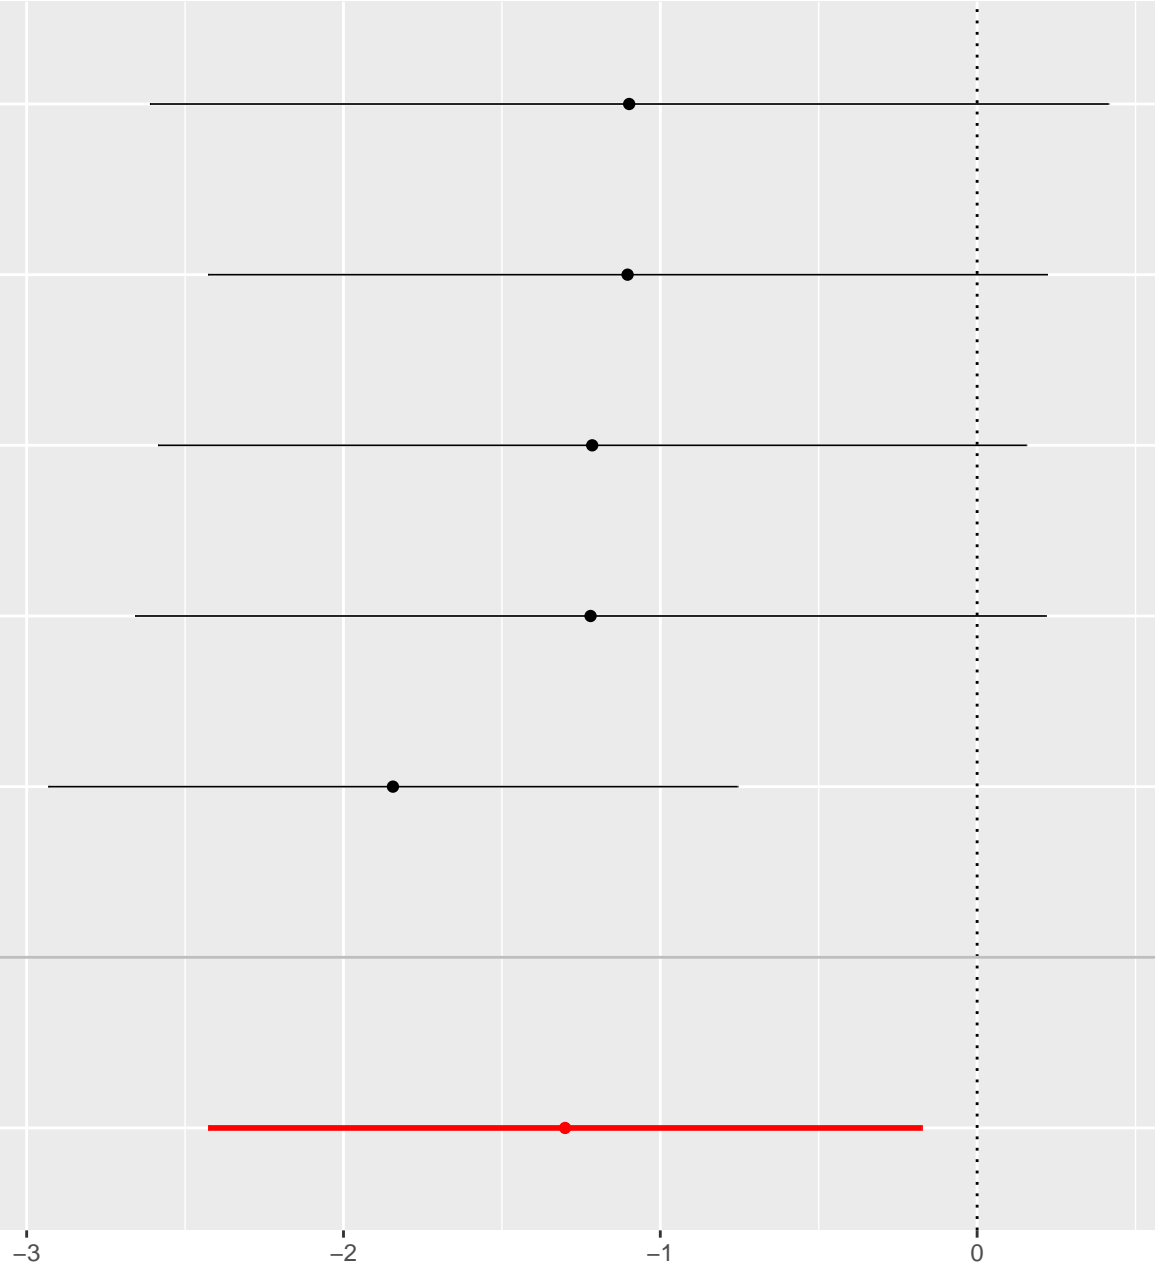

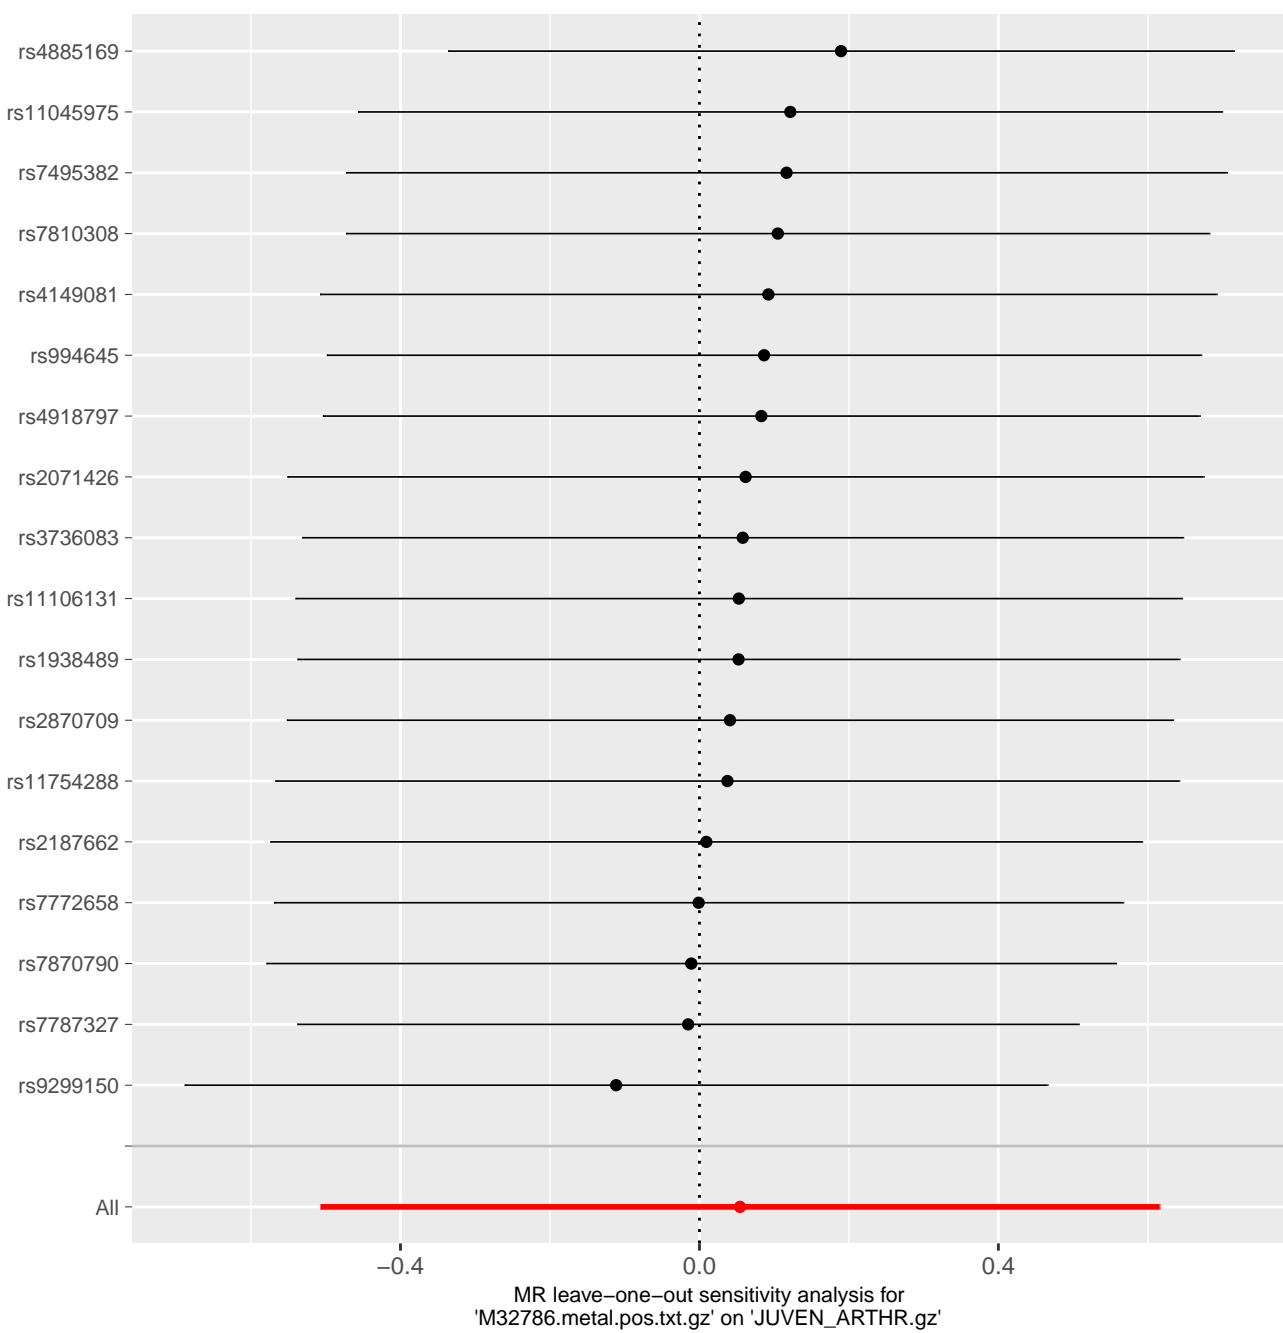



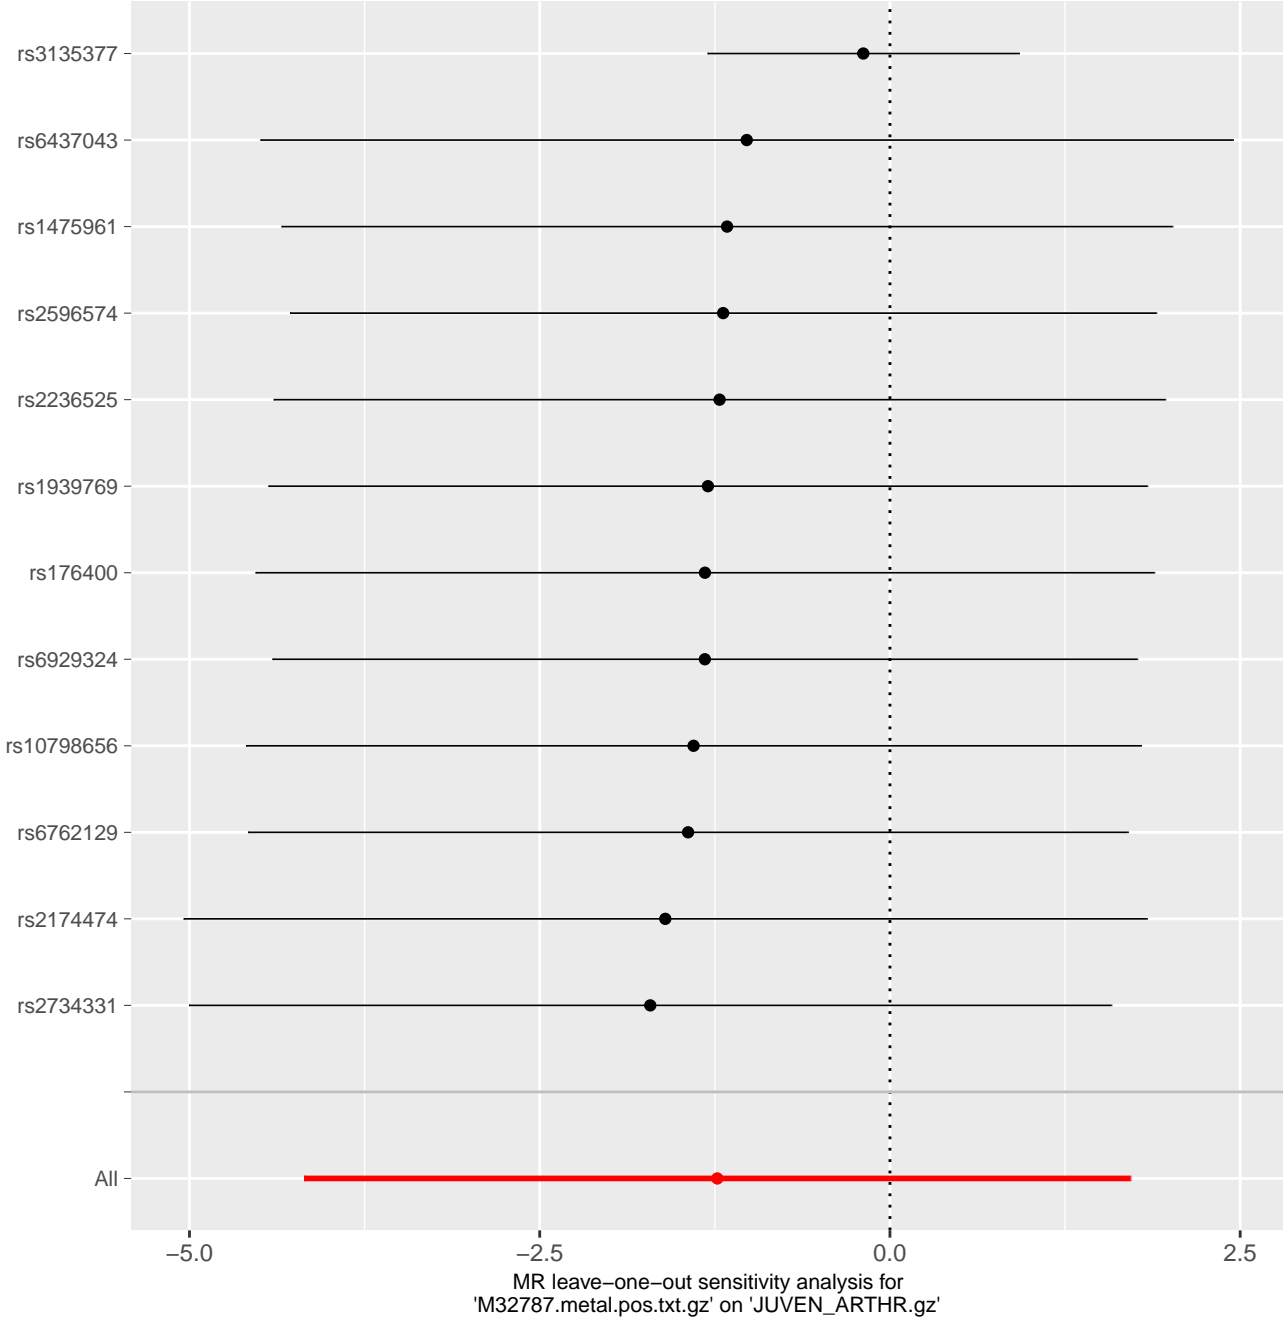

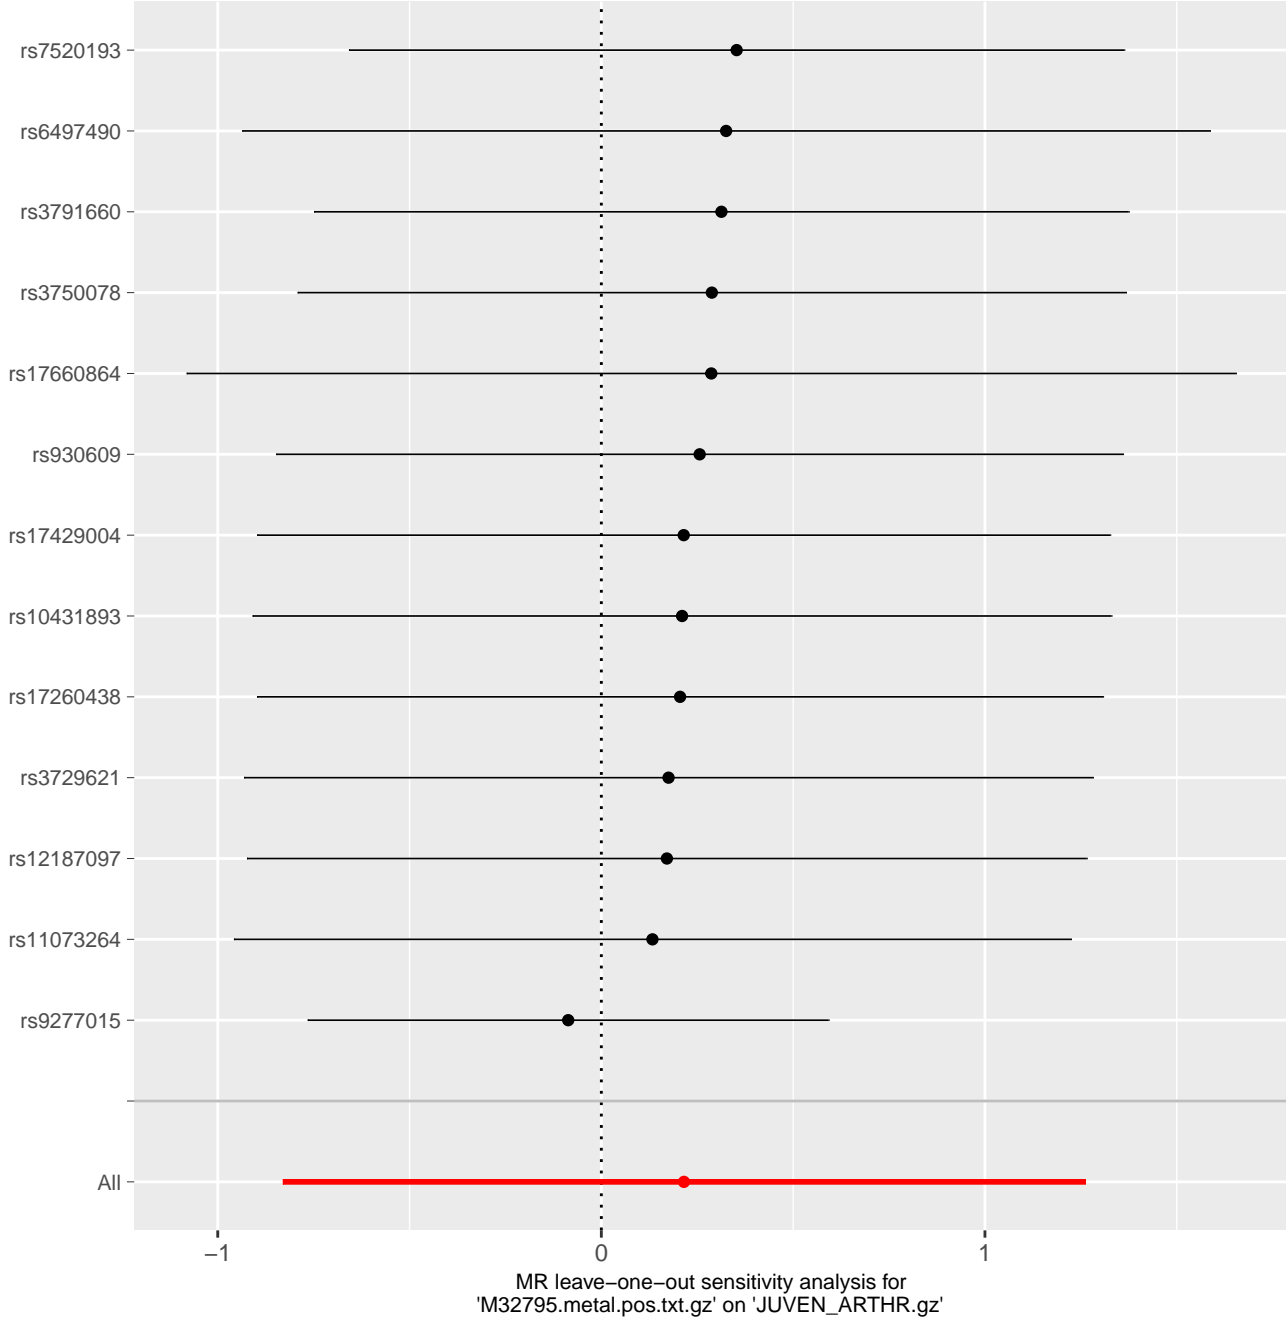

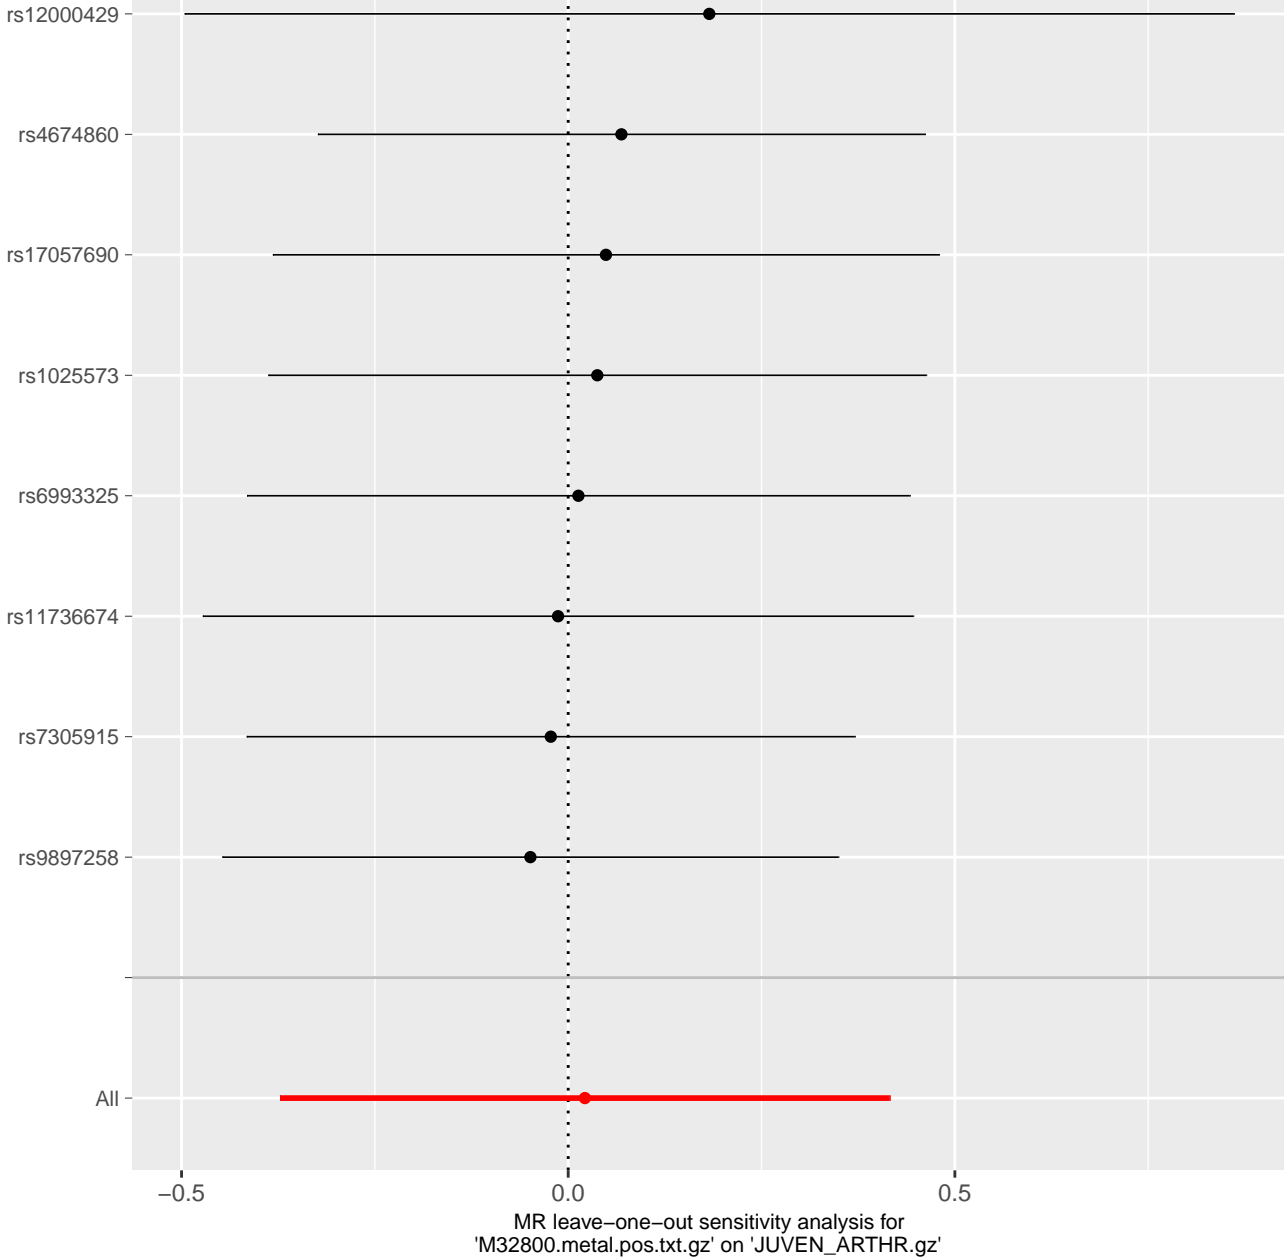

rs1017275

rs853725

rs307944

rs2231142

All

-1

0

1

2

MR leave-one-out sensitivity analysis for  
'M32802.metal.pos.txt.gz' on 'JUVEN\_ARTHR.gz'

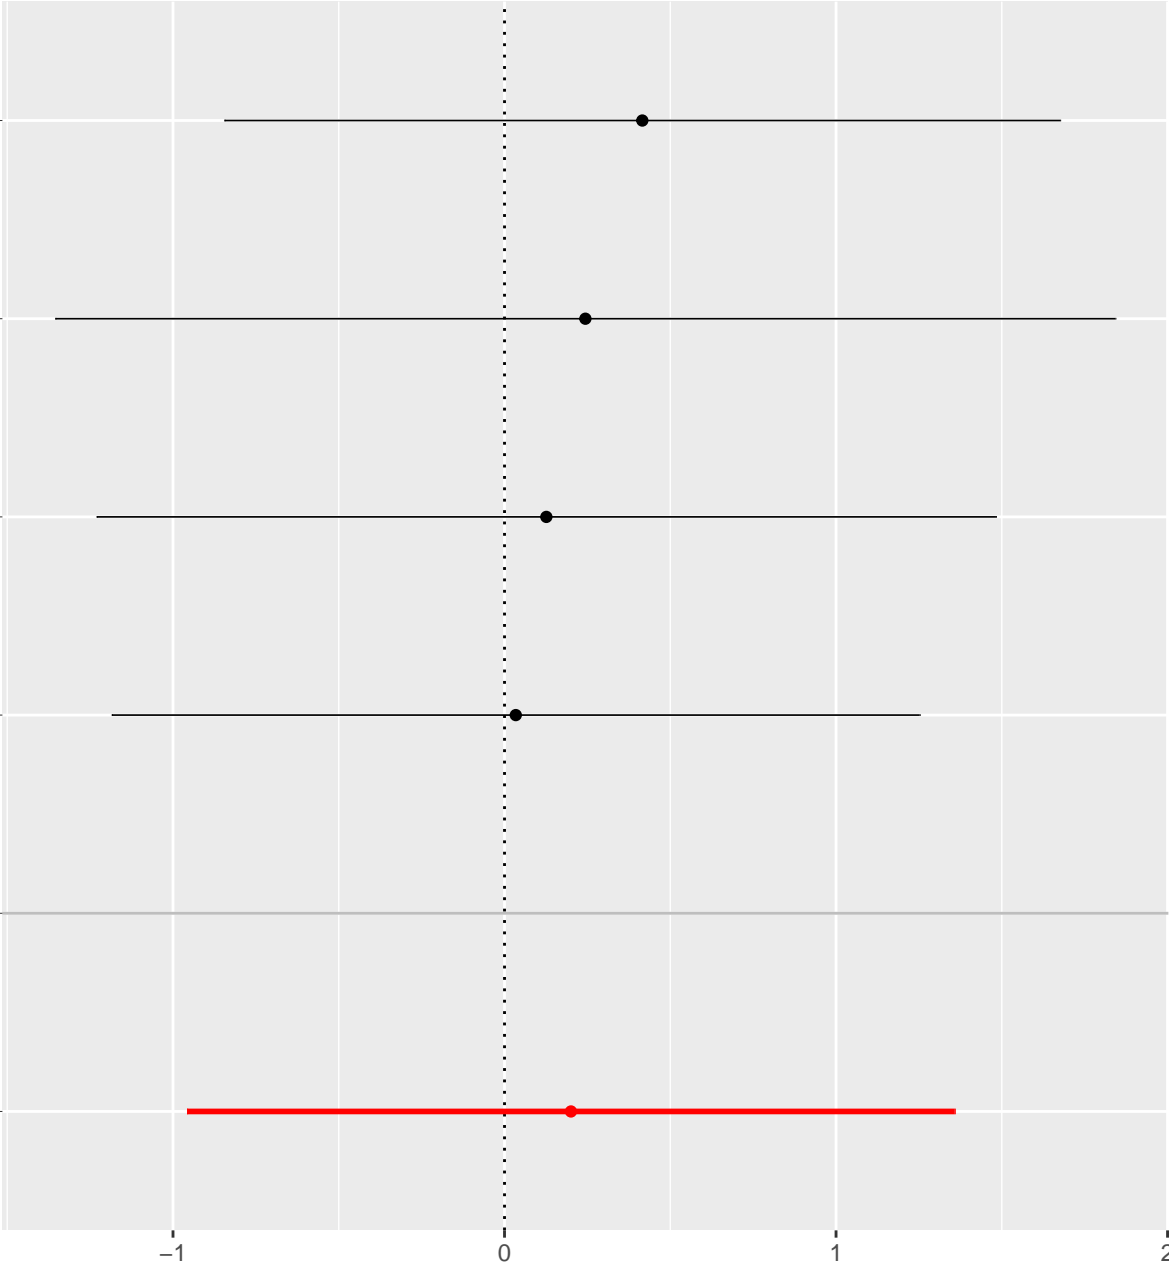

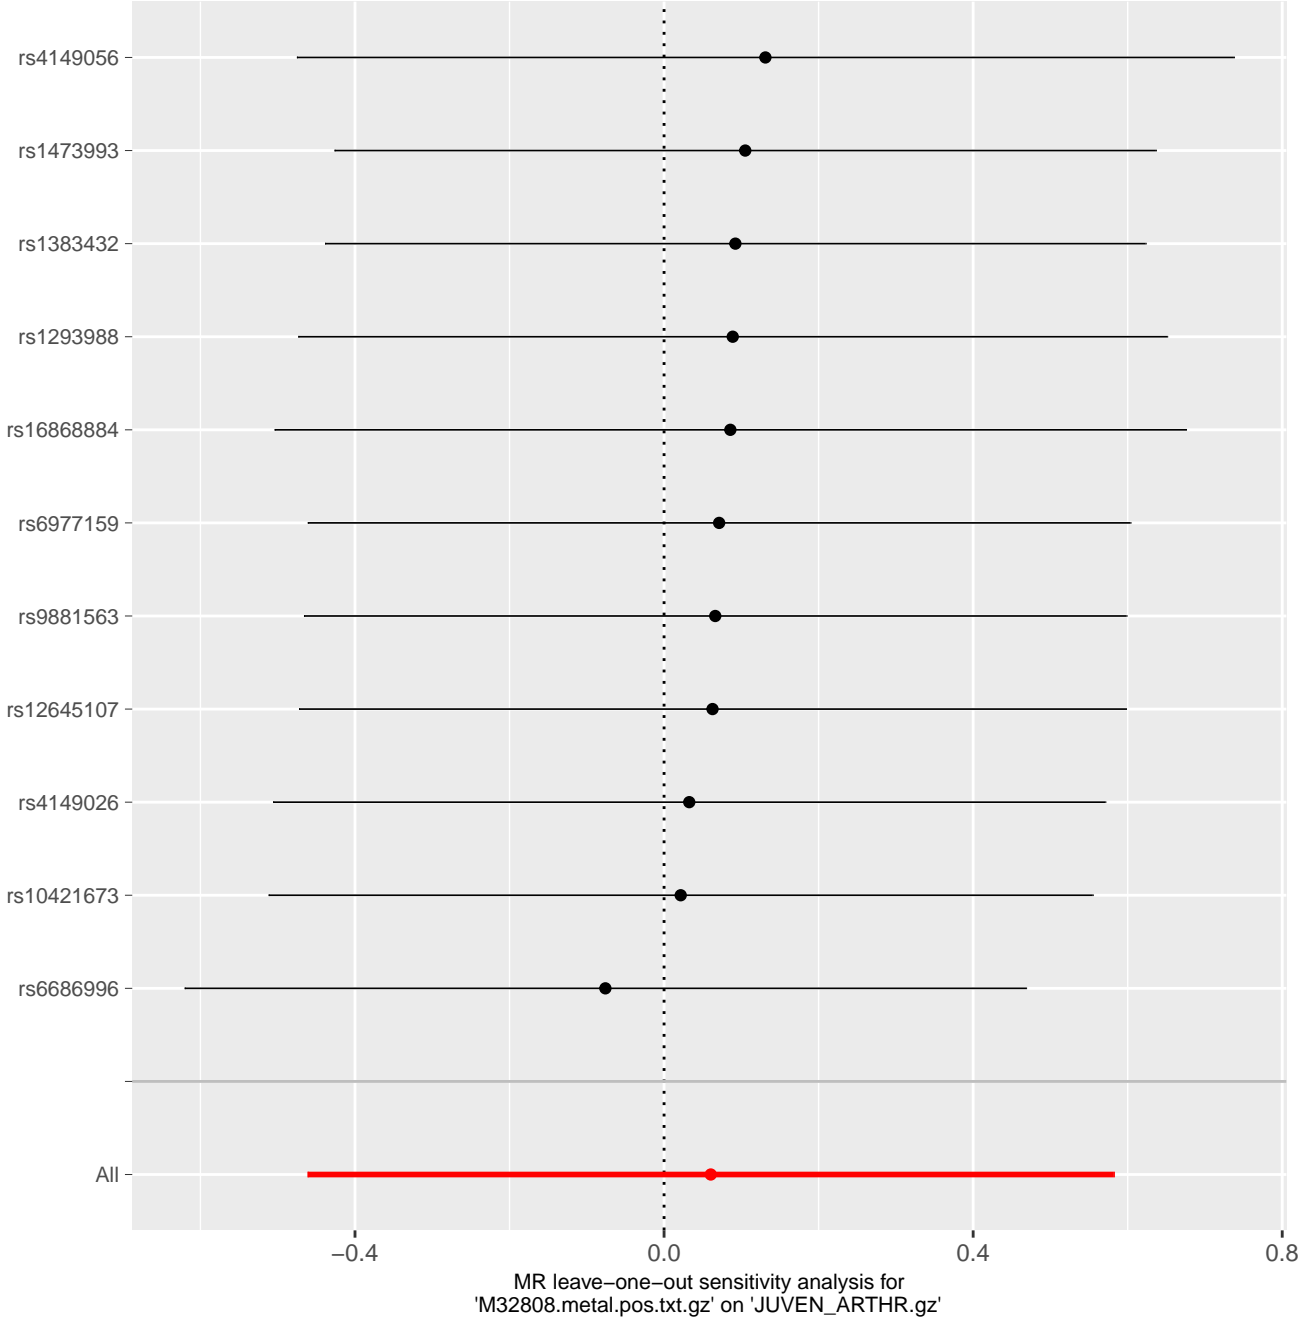

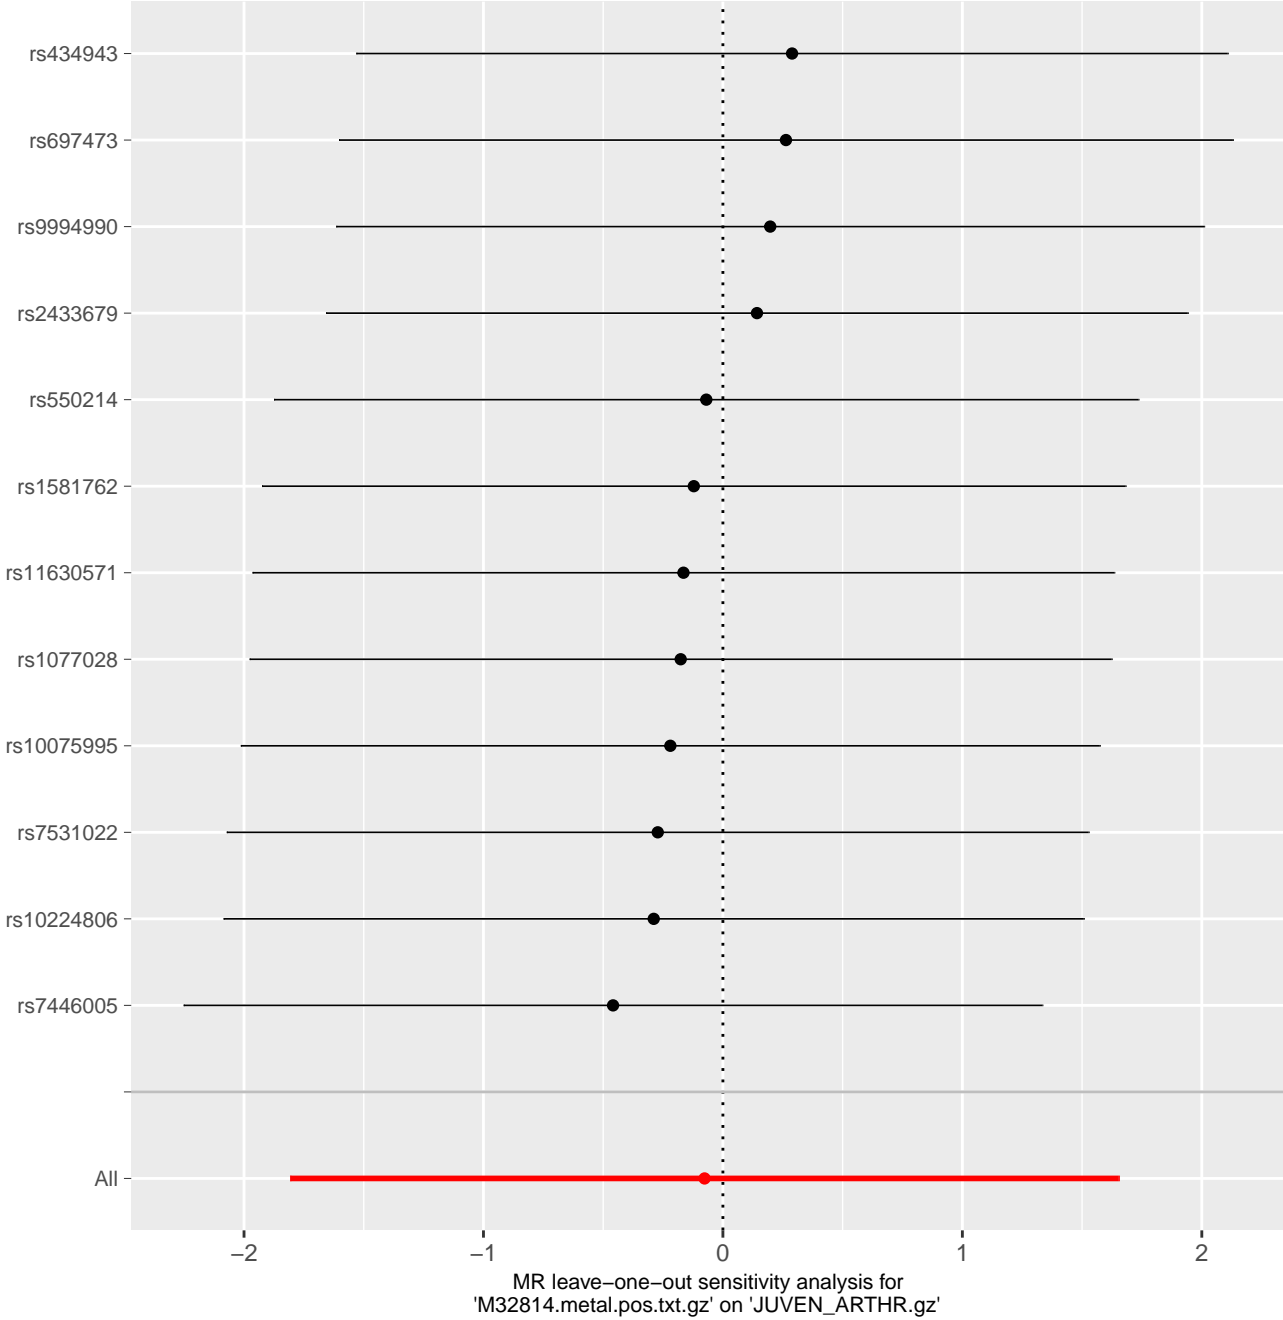

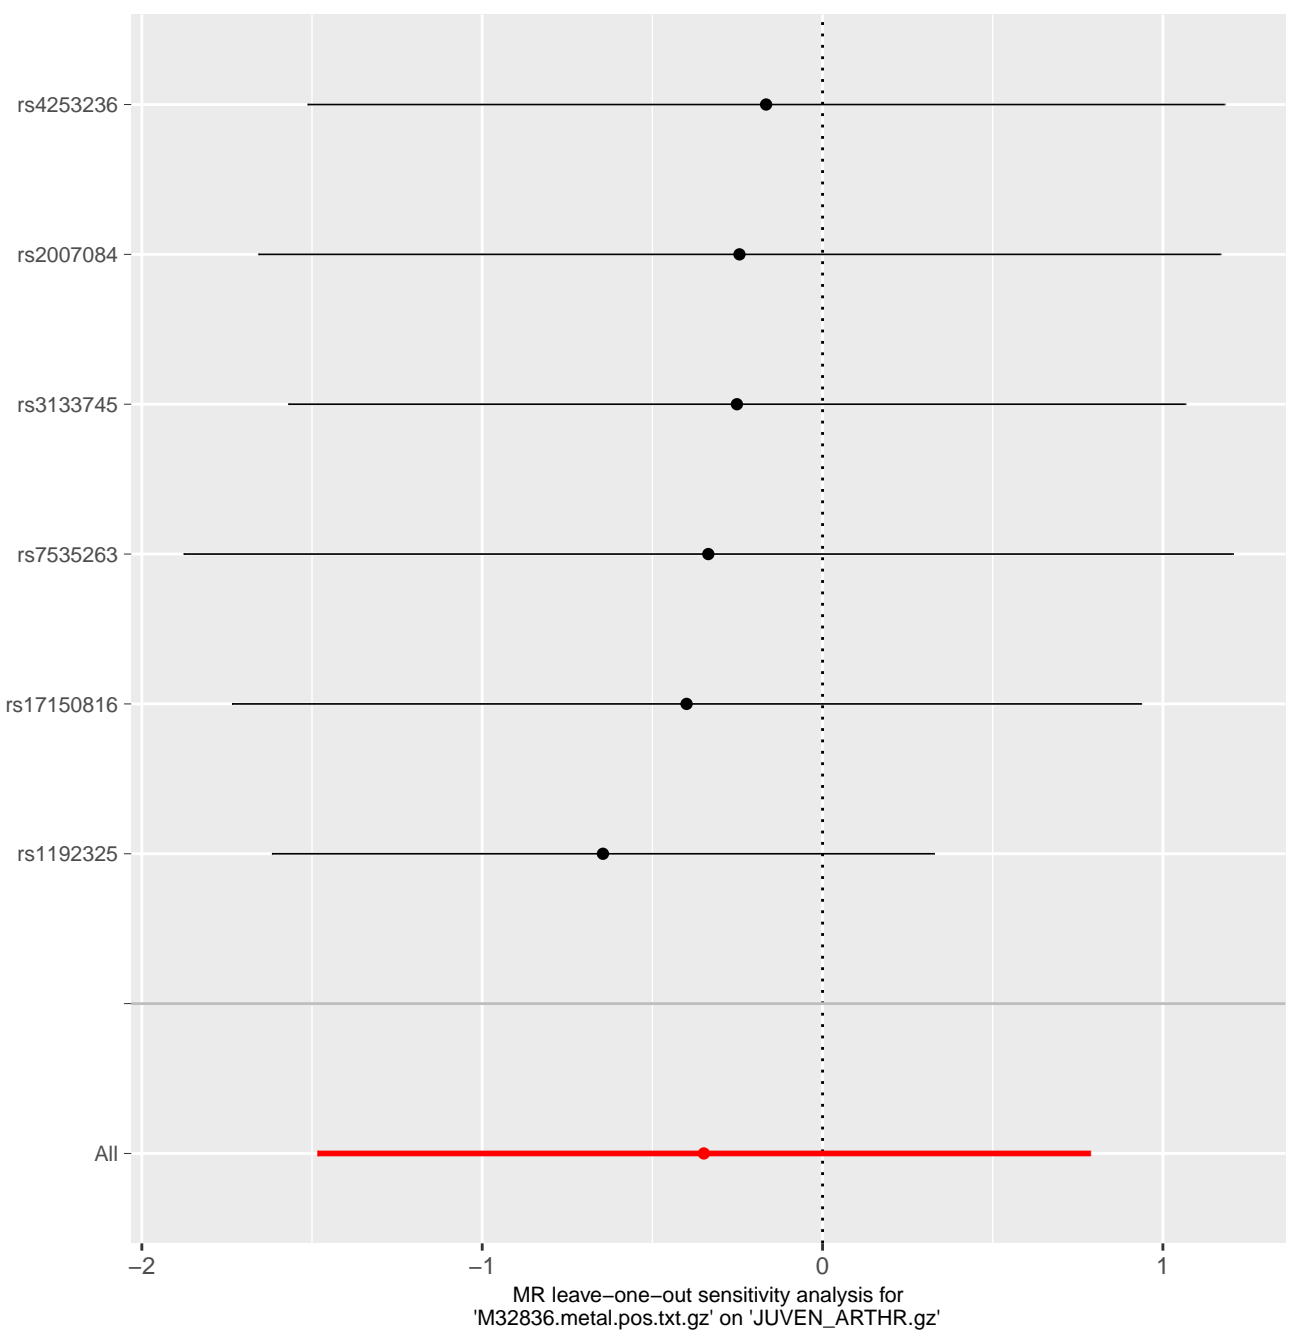

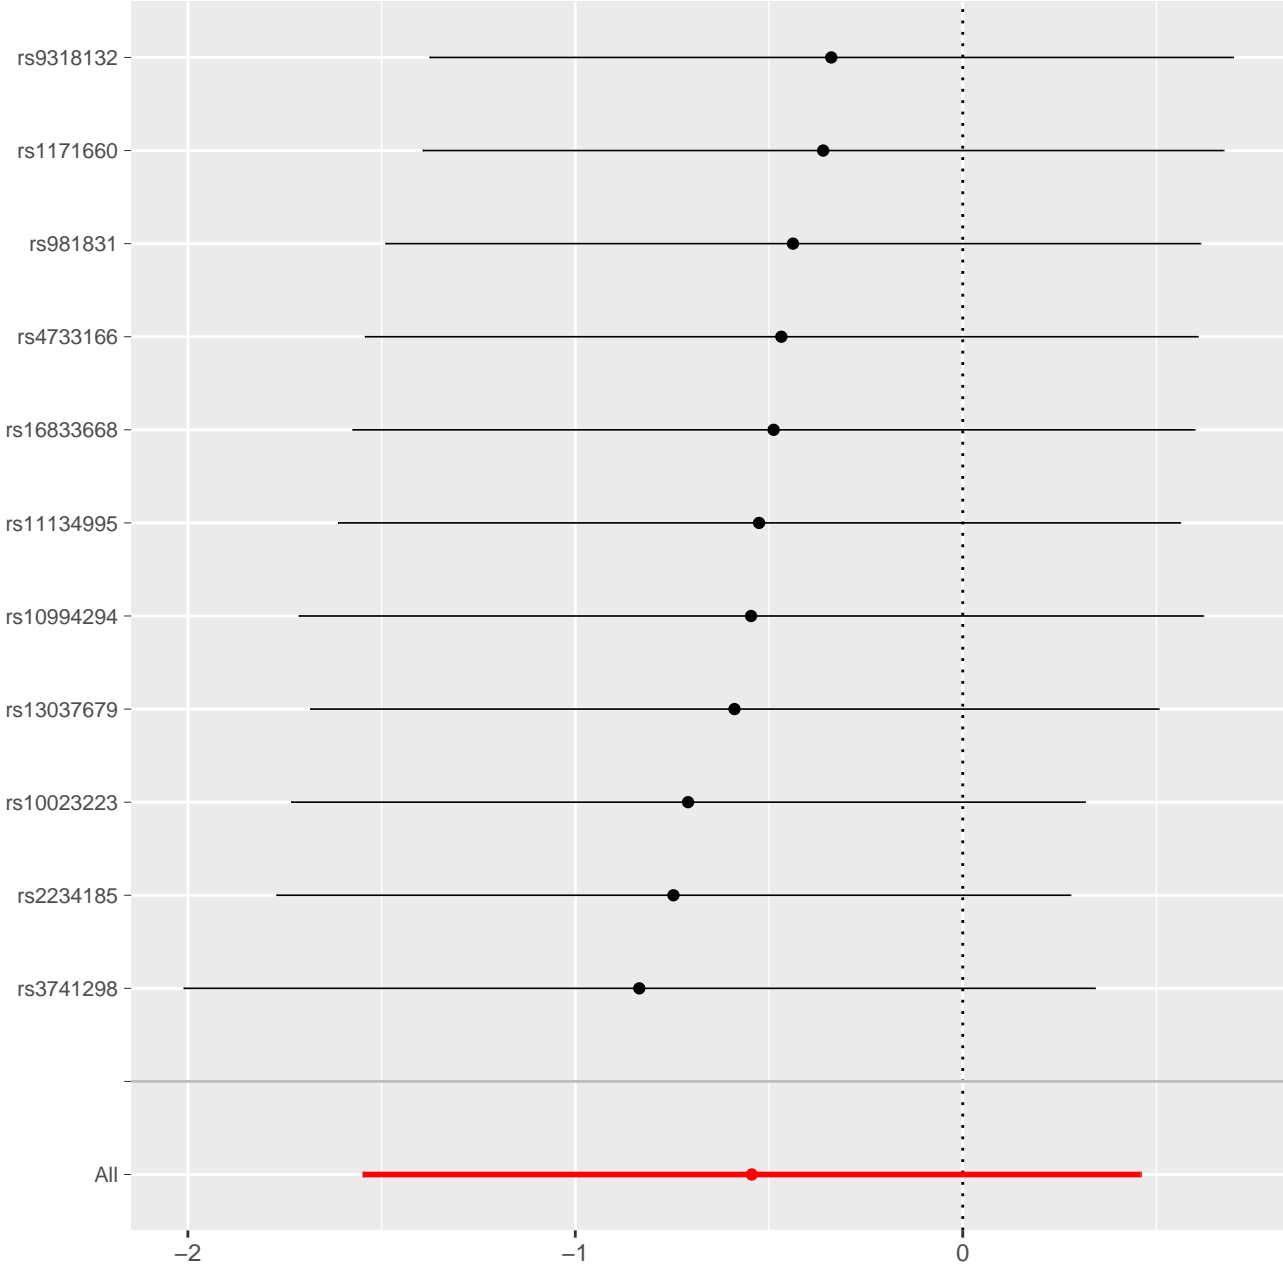



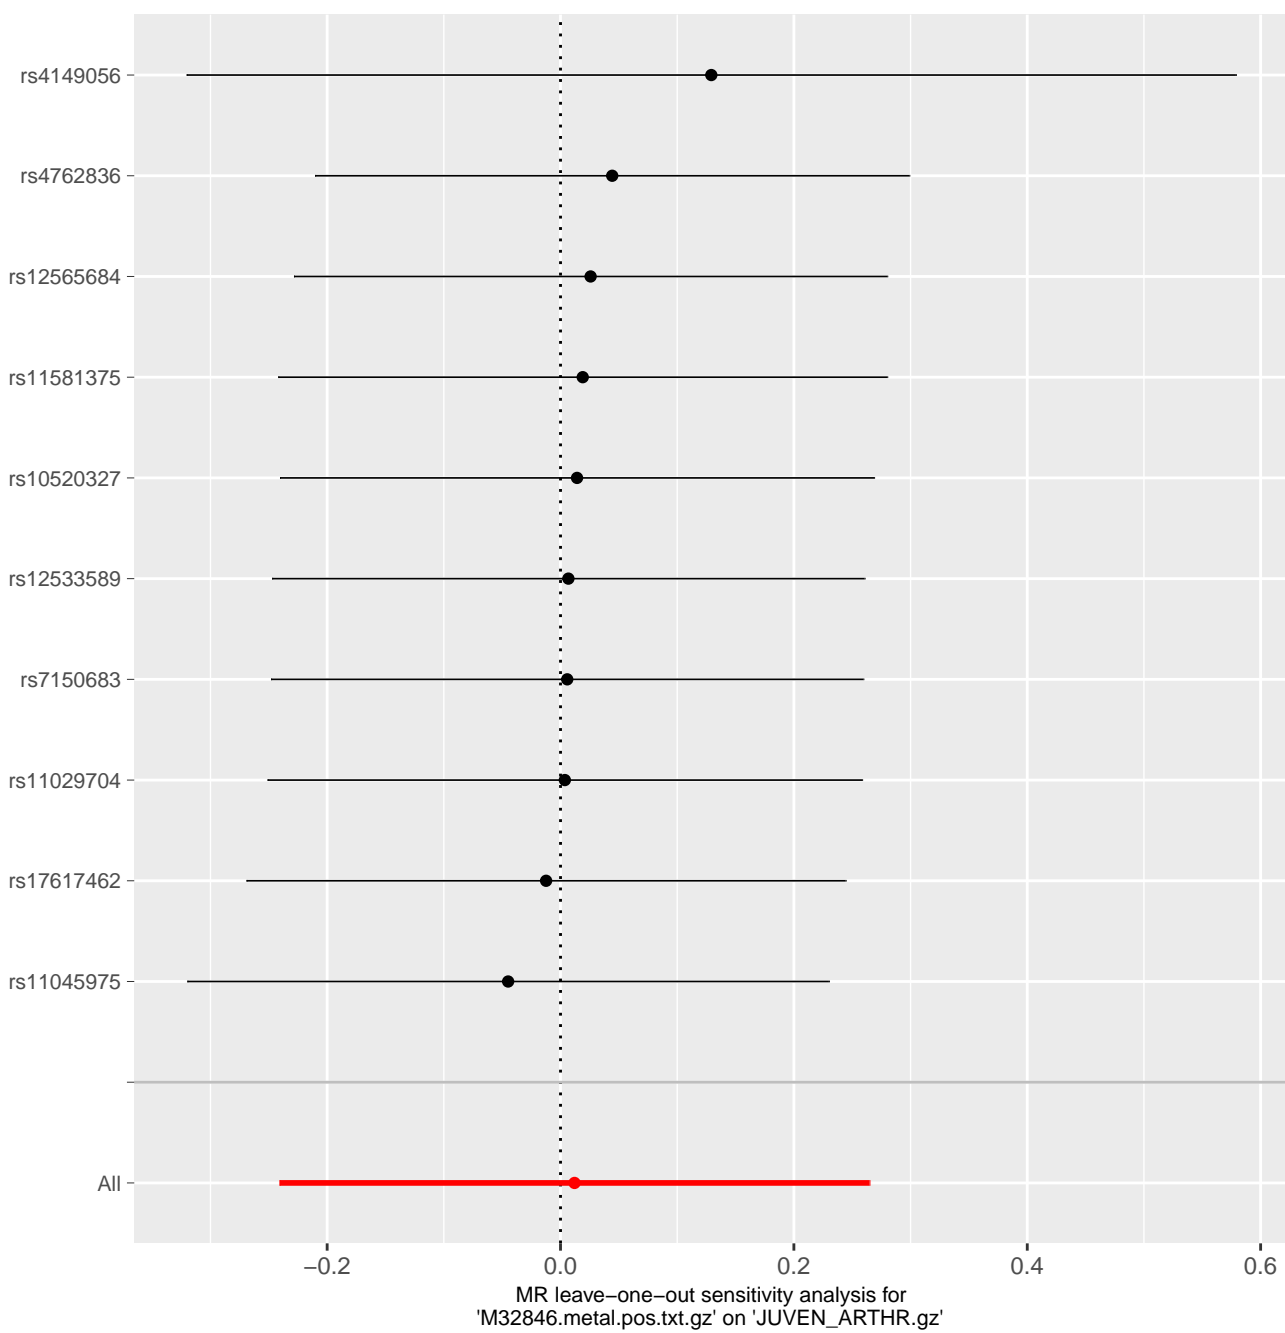

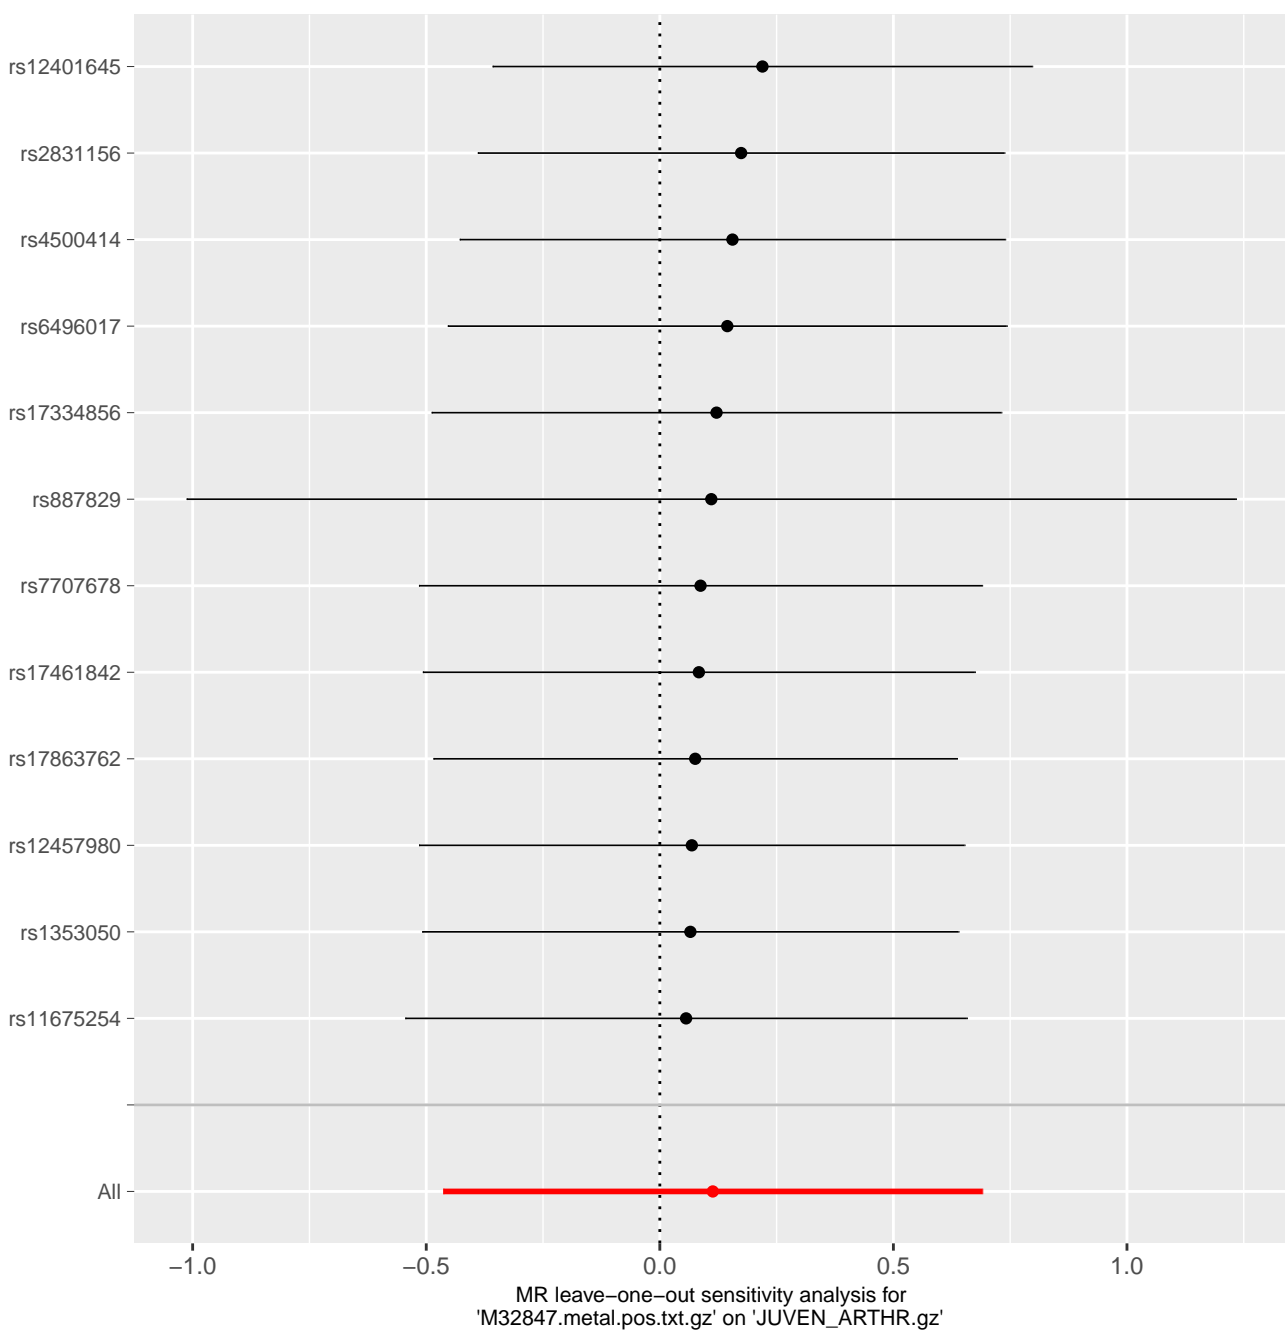

rs6723705

rs4899909

rs10428305

rs6763260

rs7559623

All

0

1

2

MR leave-one-out sensitivity analysis for  
'M32854.metal.pos.txt.gz' on 'JUVEN\_ARTHR.gz'

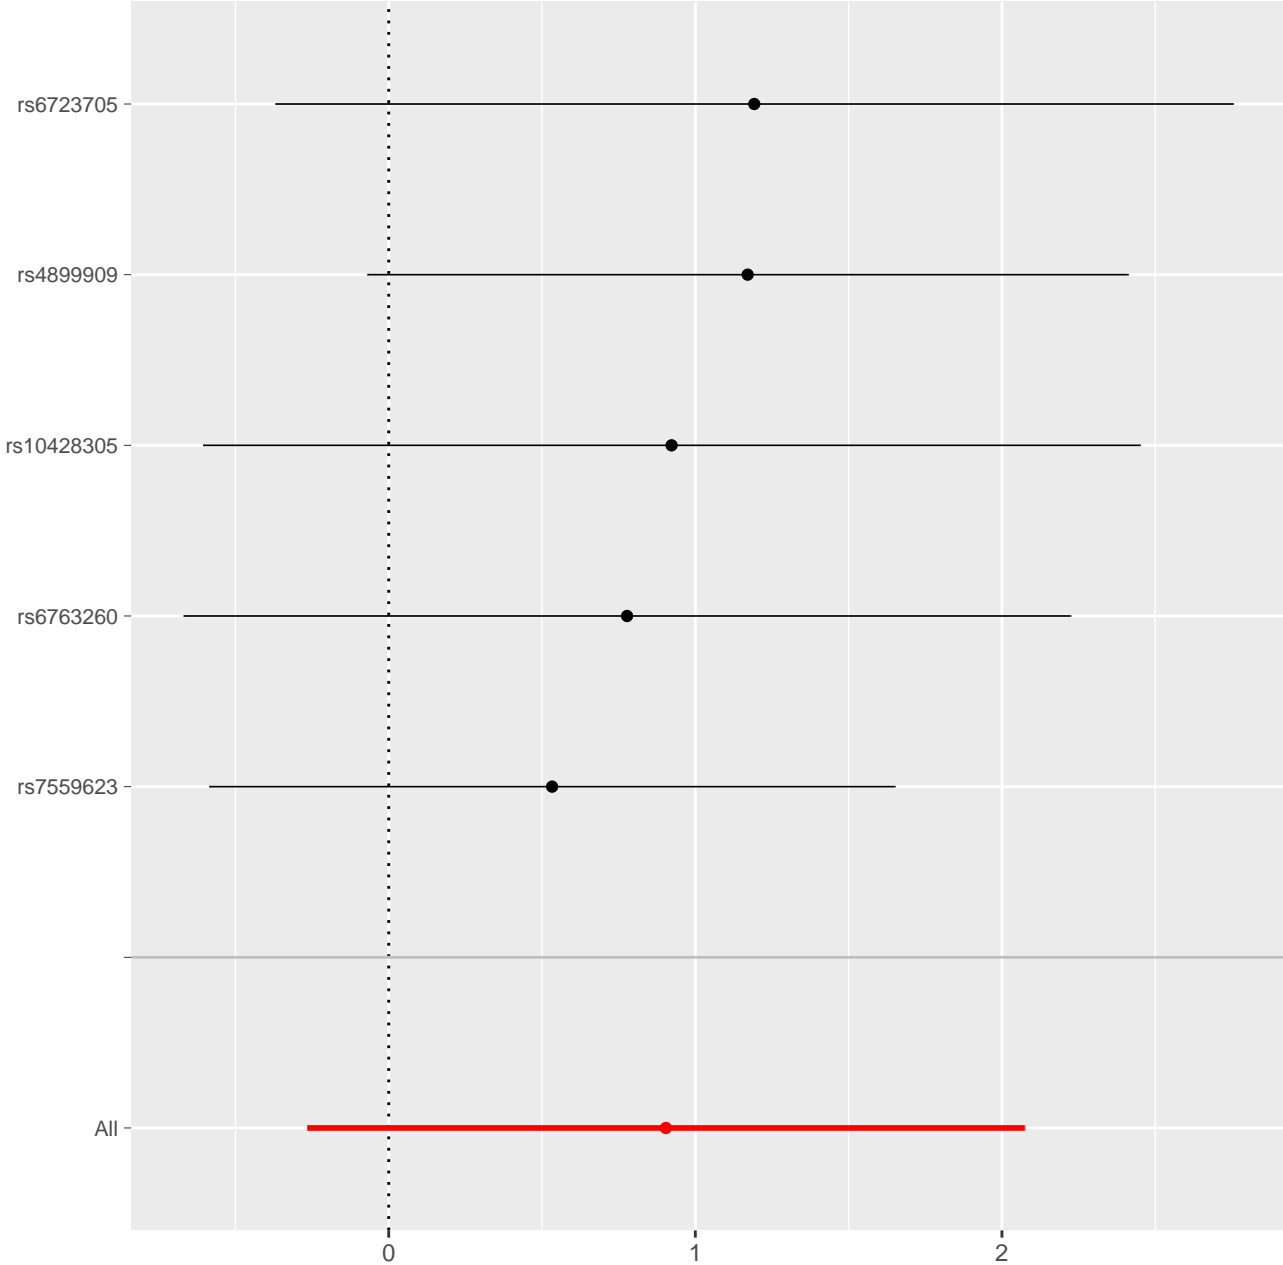

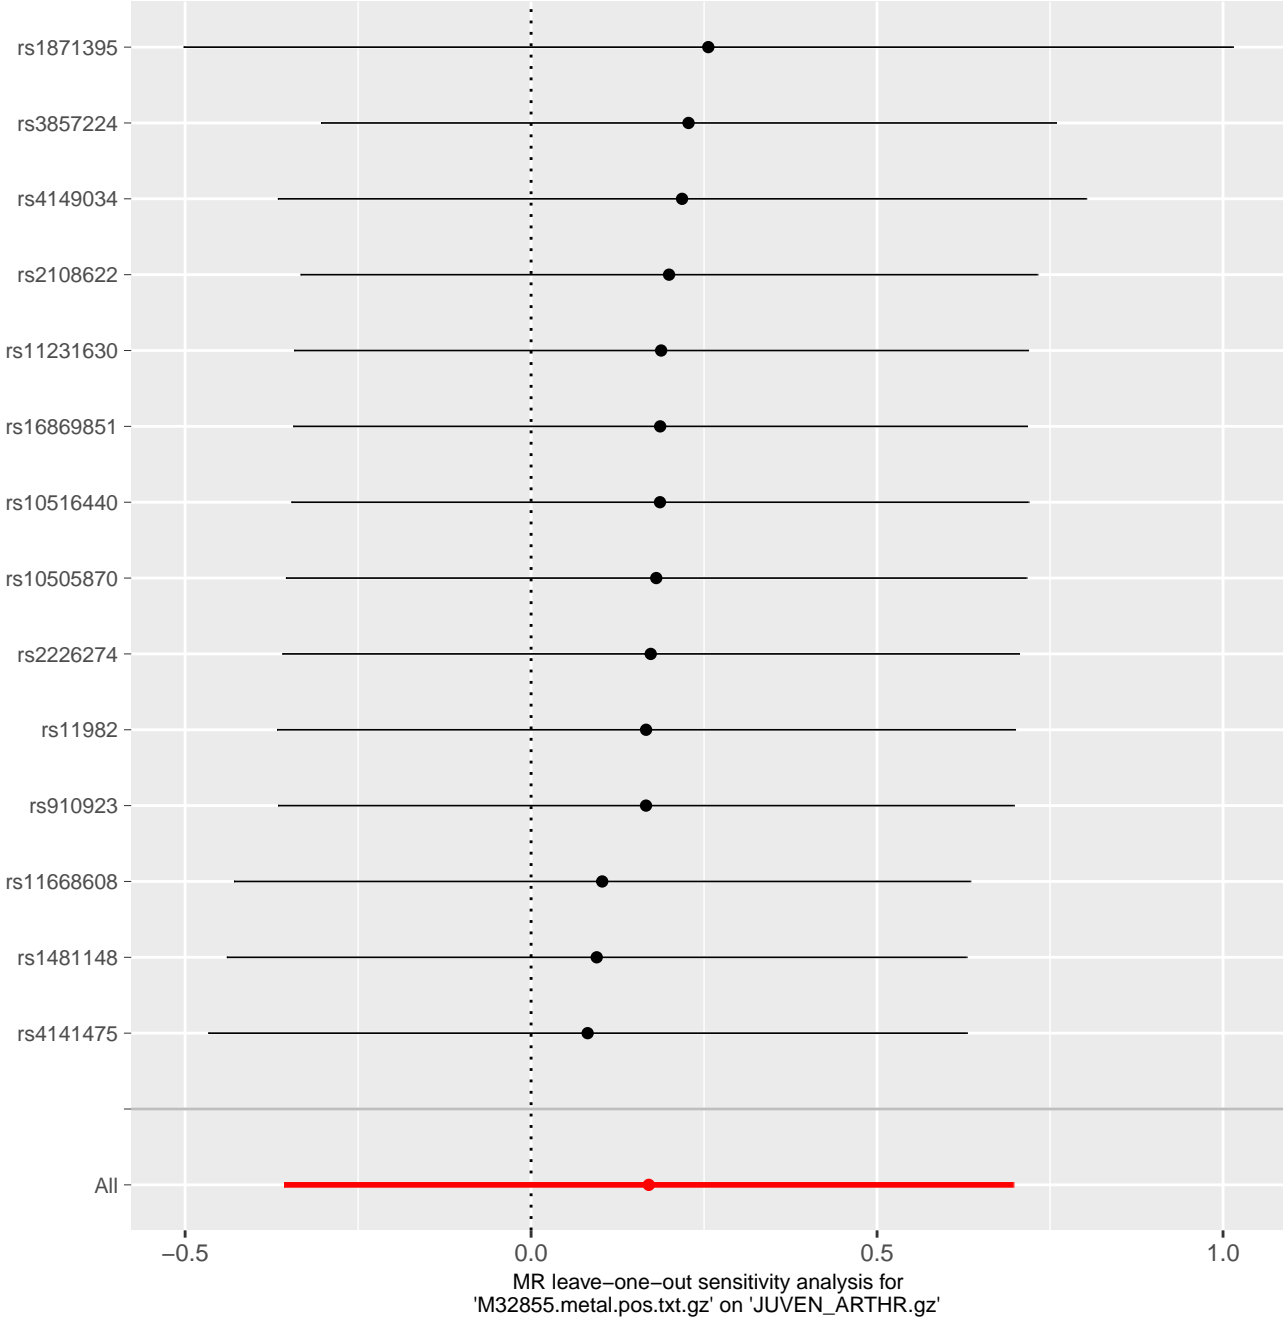

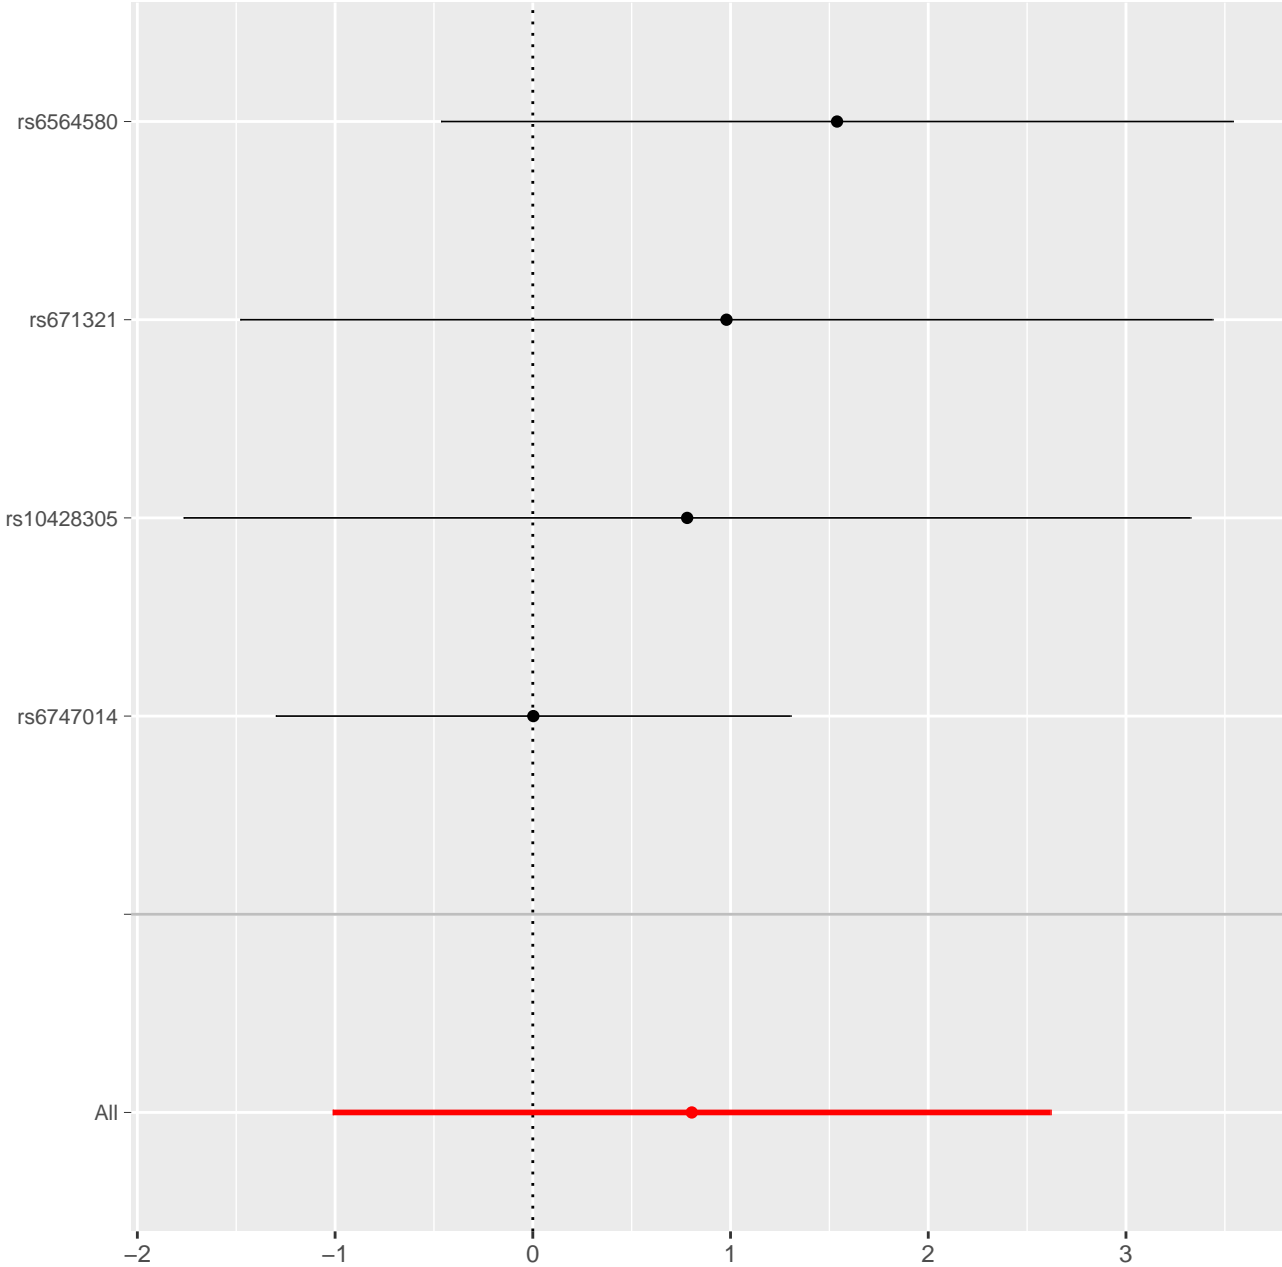

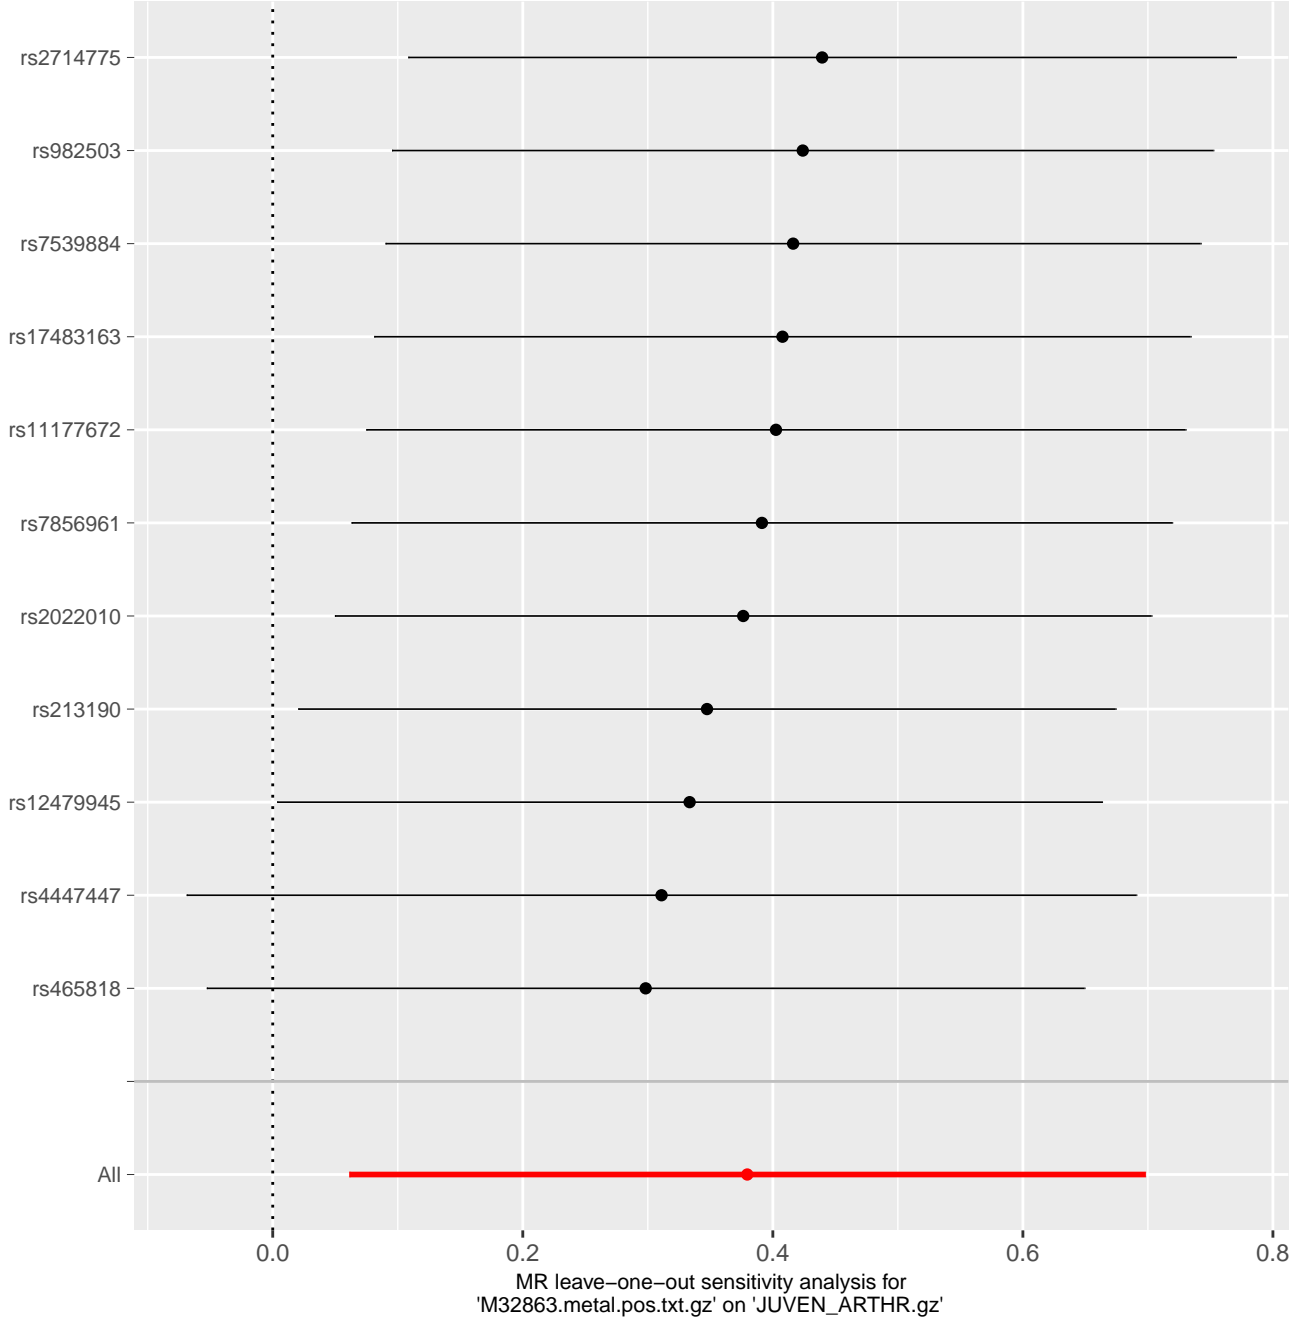

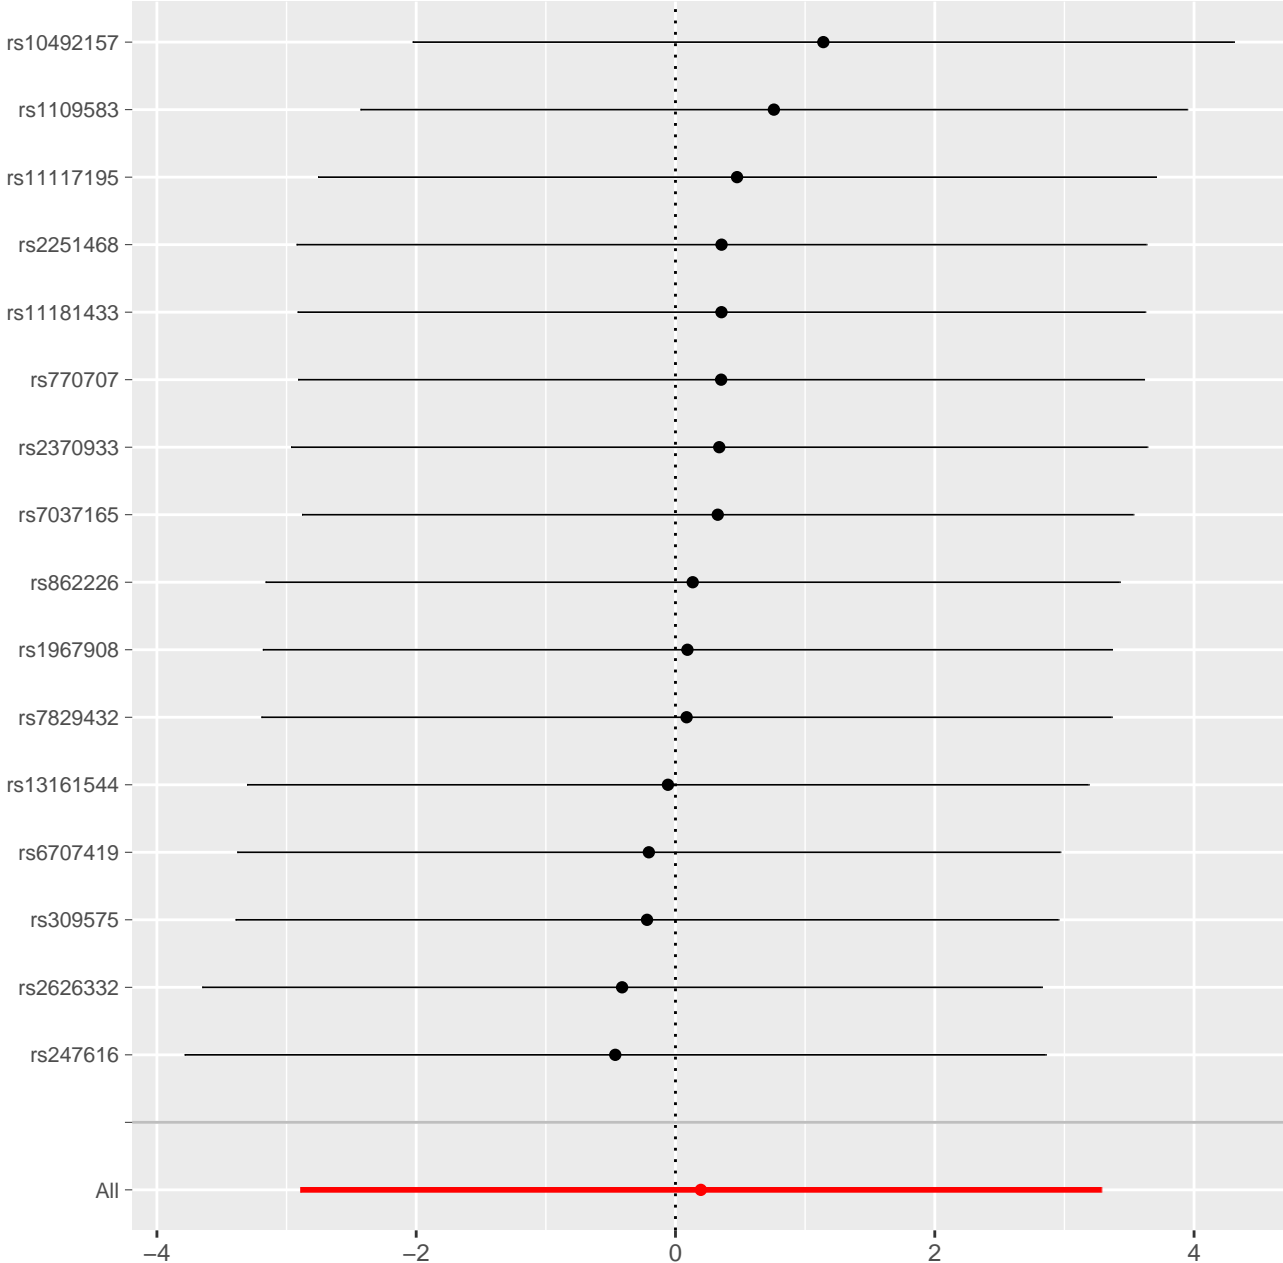

MR leave-one-out sensitivity analysis for 'M32867.metal.pos.txt.gz' on 'JUVEN\_ARTHR.gz'

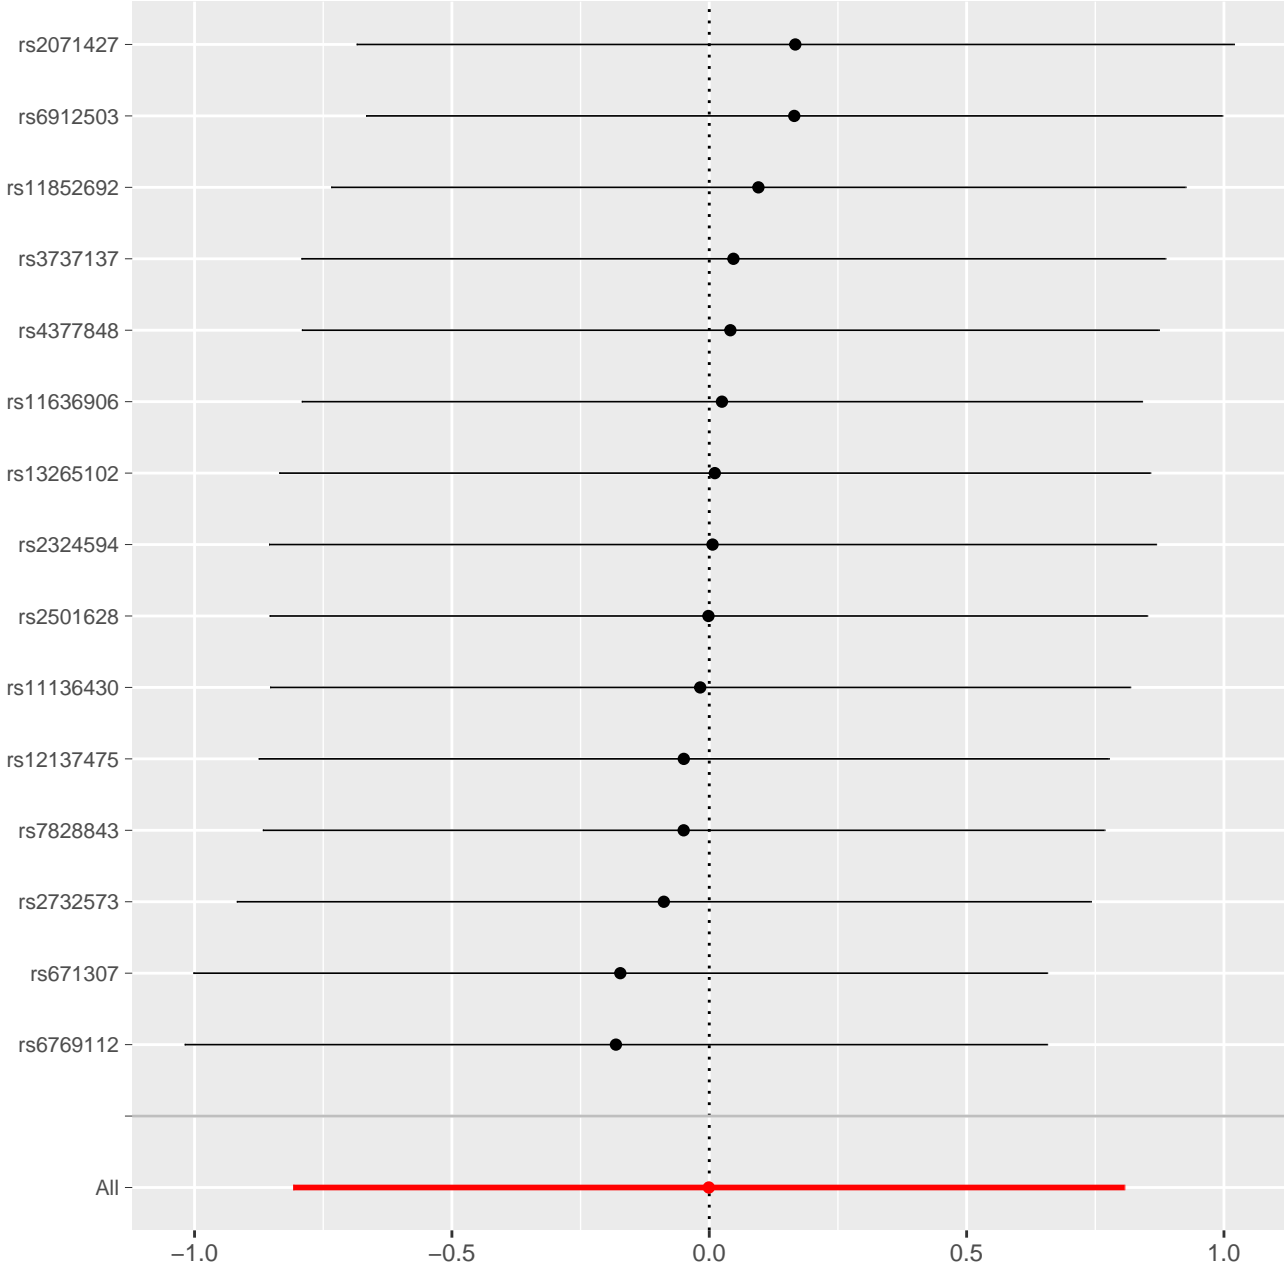

MR leave-one-out sensitivity analysis for 'M32869.metal.pos.txt.gz' on 'JUVEN\_ARTHR.gz'



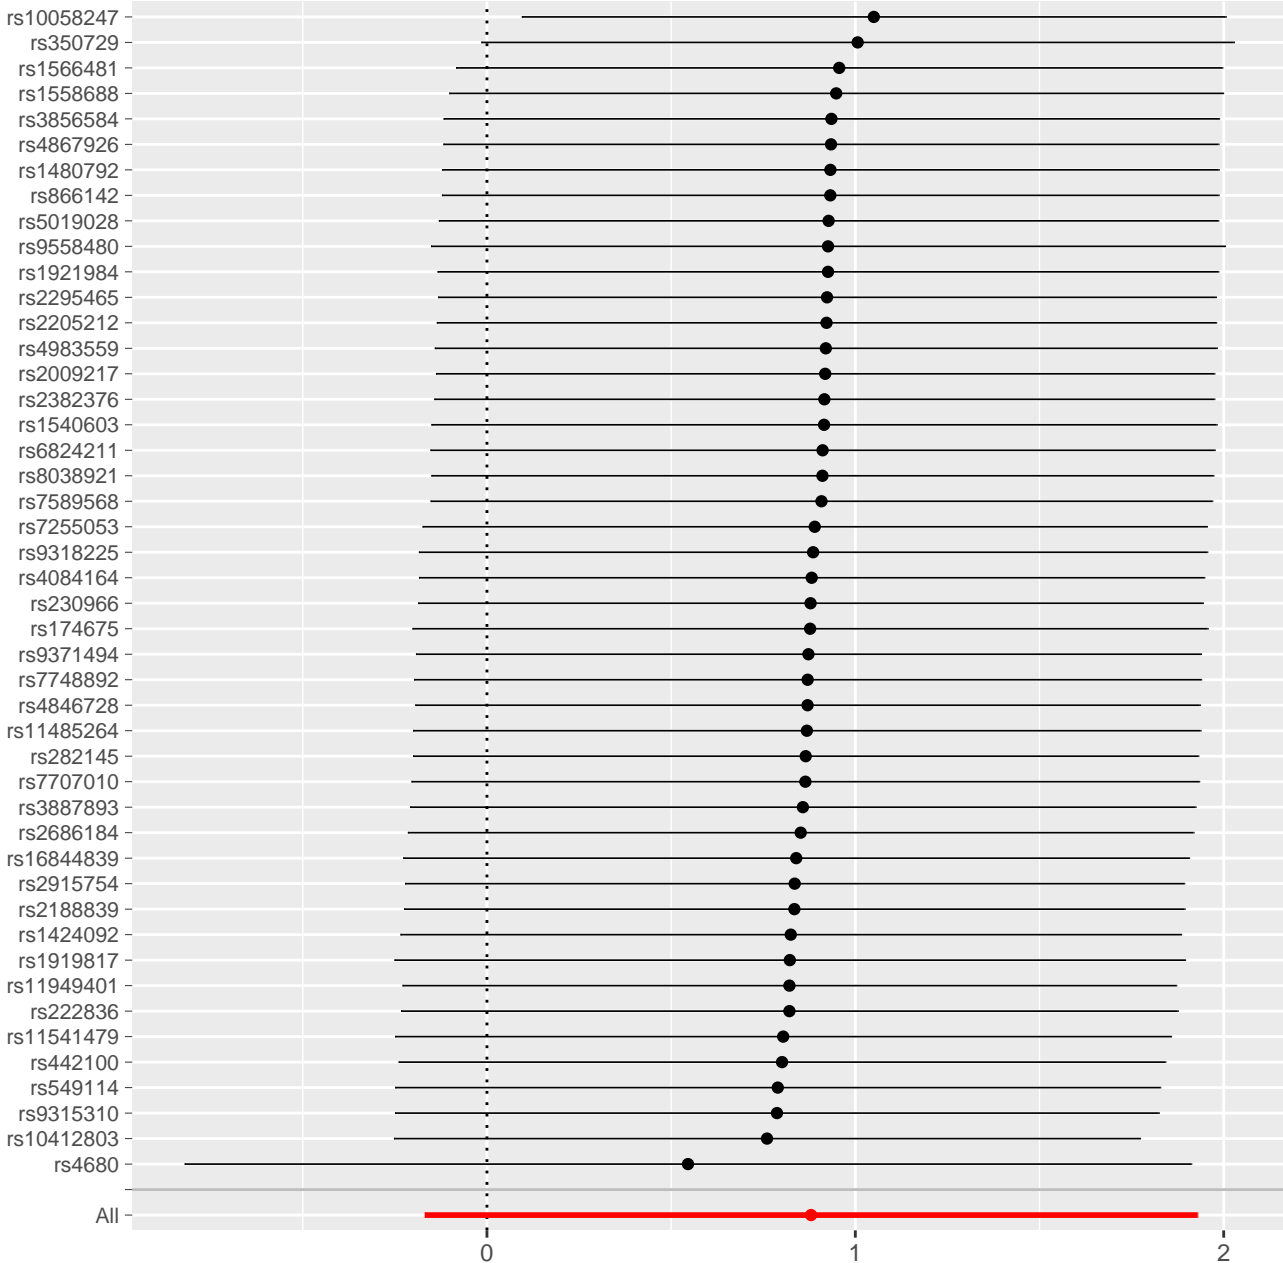

MR leave-one-out sensitivity analysis for 'M32910.metal.pos.txt.gz' on 'JUVEN\_ARTHR.gz'

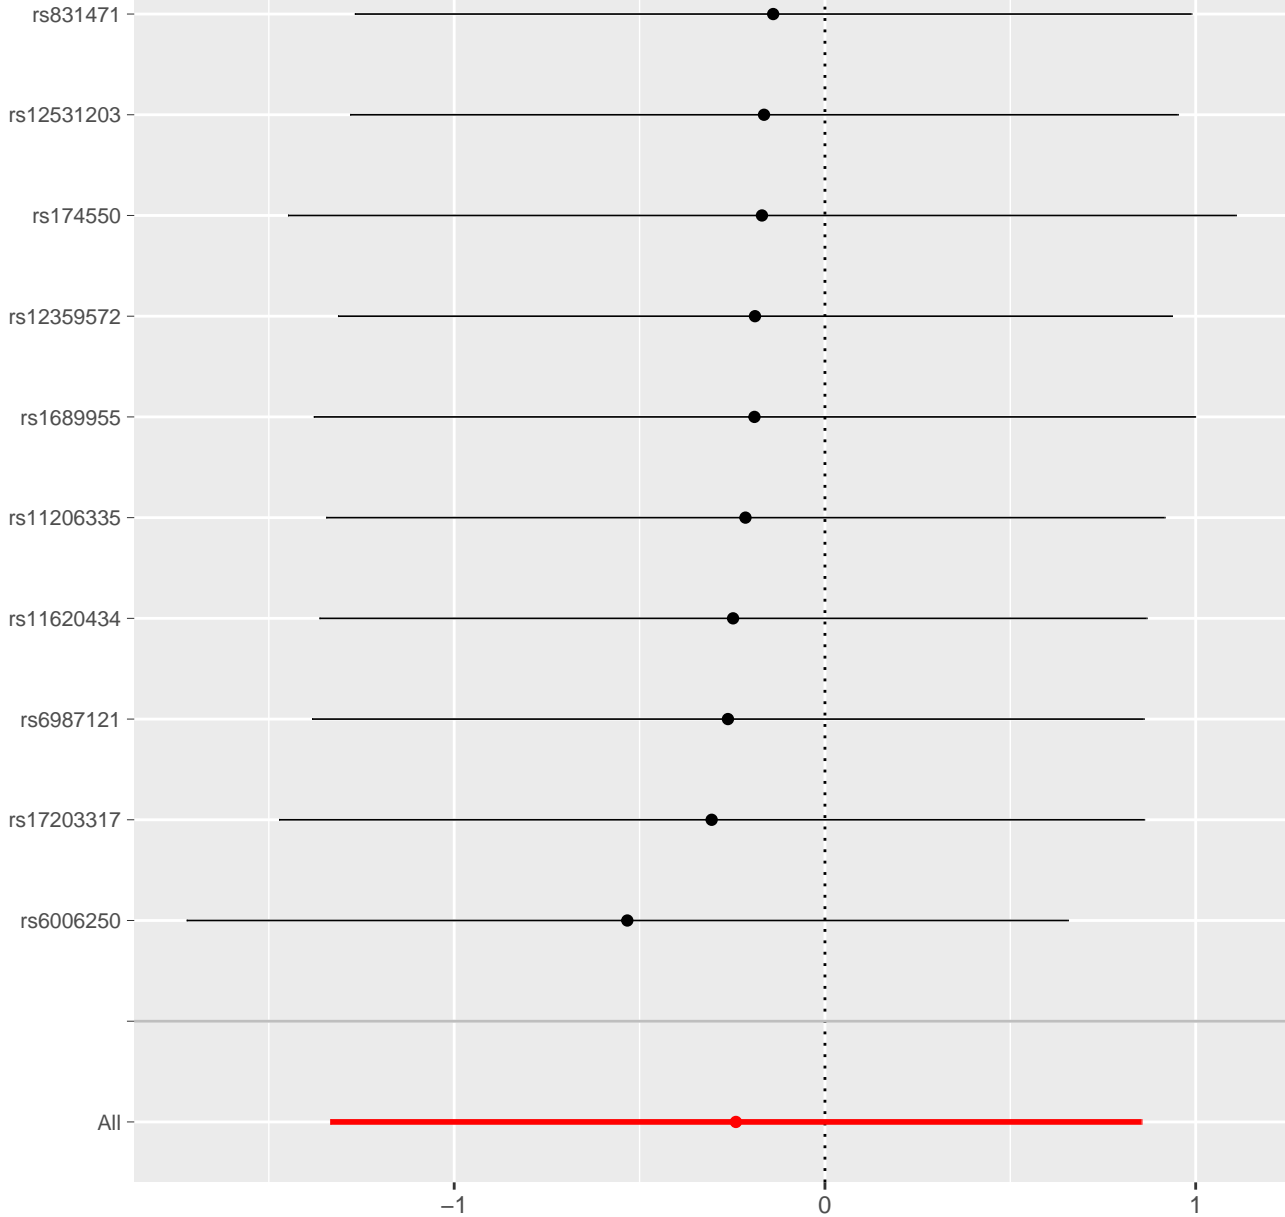

MR leave-one-out sensitivity analysis for 'M32980.metal.pos.txt.gz' on 'JUVEN\_ARTHR.gz'

rs9635387  
rs12630300  
rs10192021  
rs11999484  
rs8008553  
rs7838814  
All

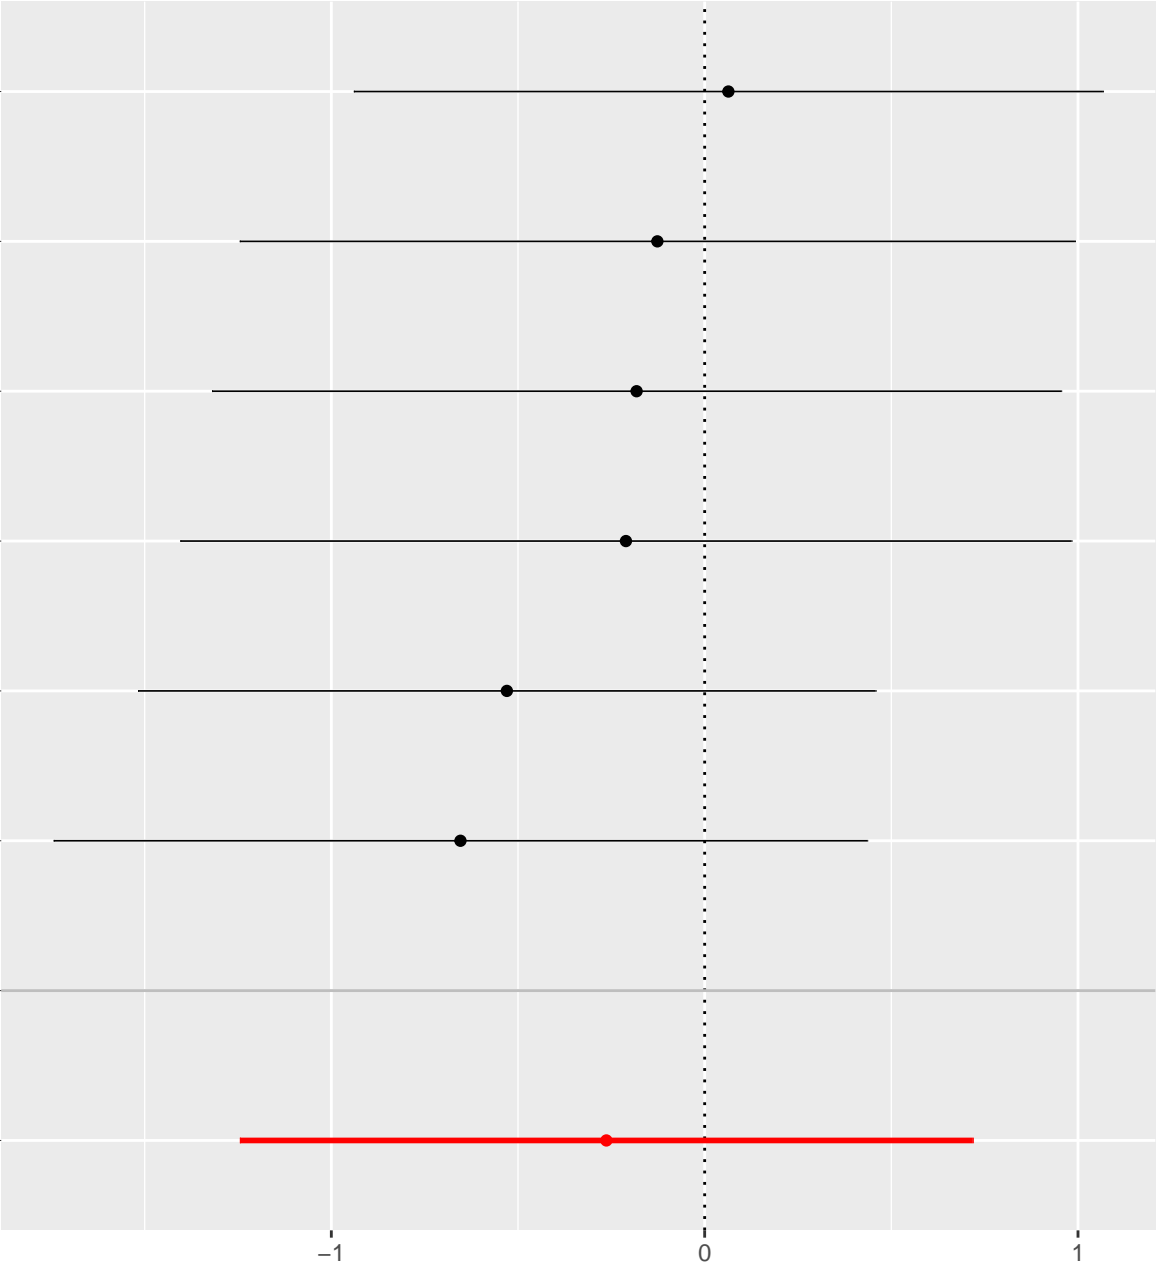

MR leave-one-out sensitivity analysis for 'M33009.metal.pos.txt.gz' on 'JUVEN\_ARTHR.gz'

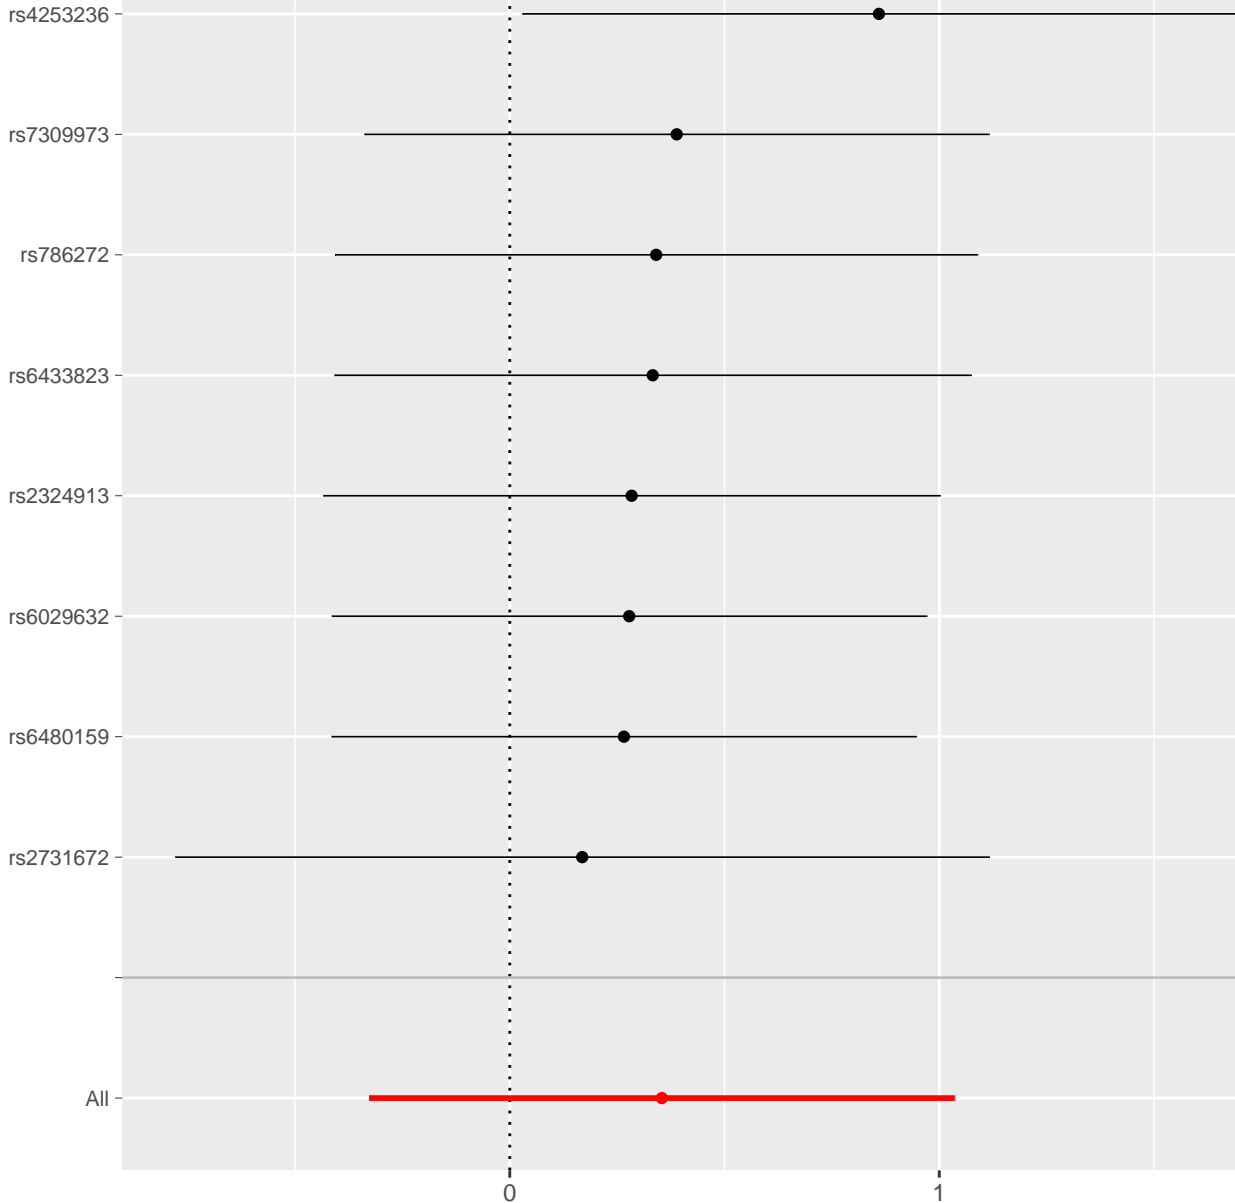

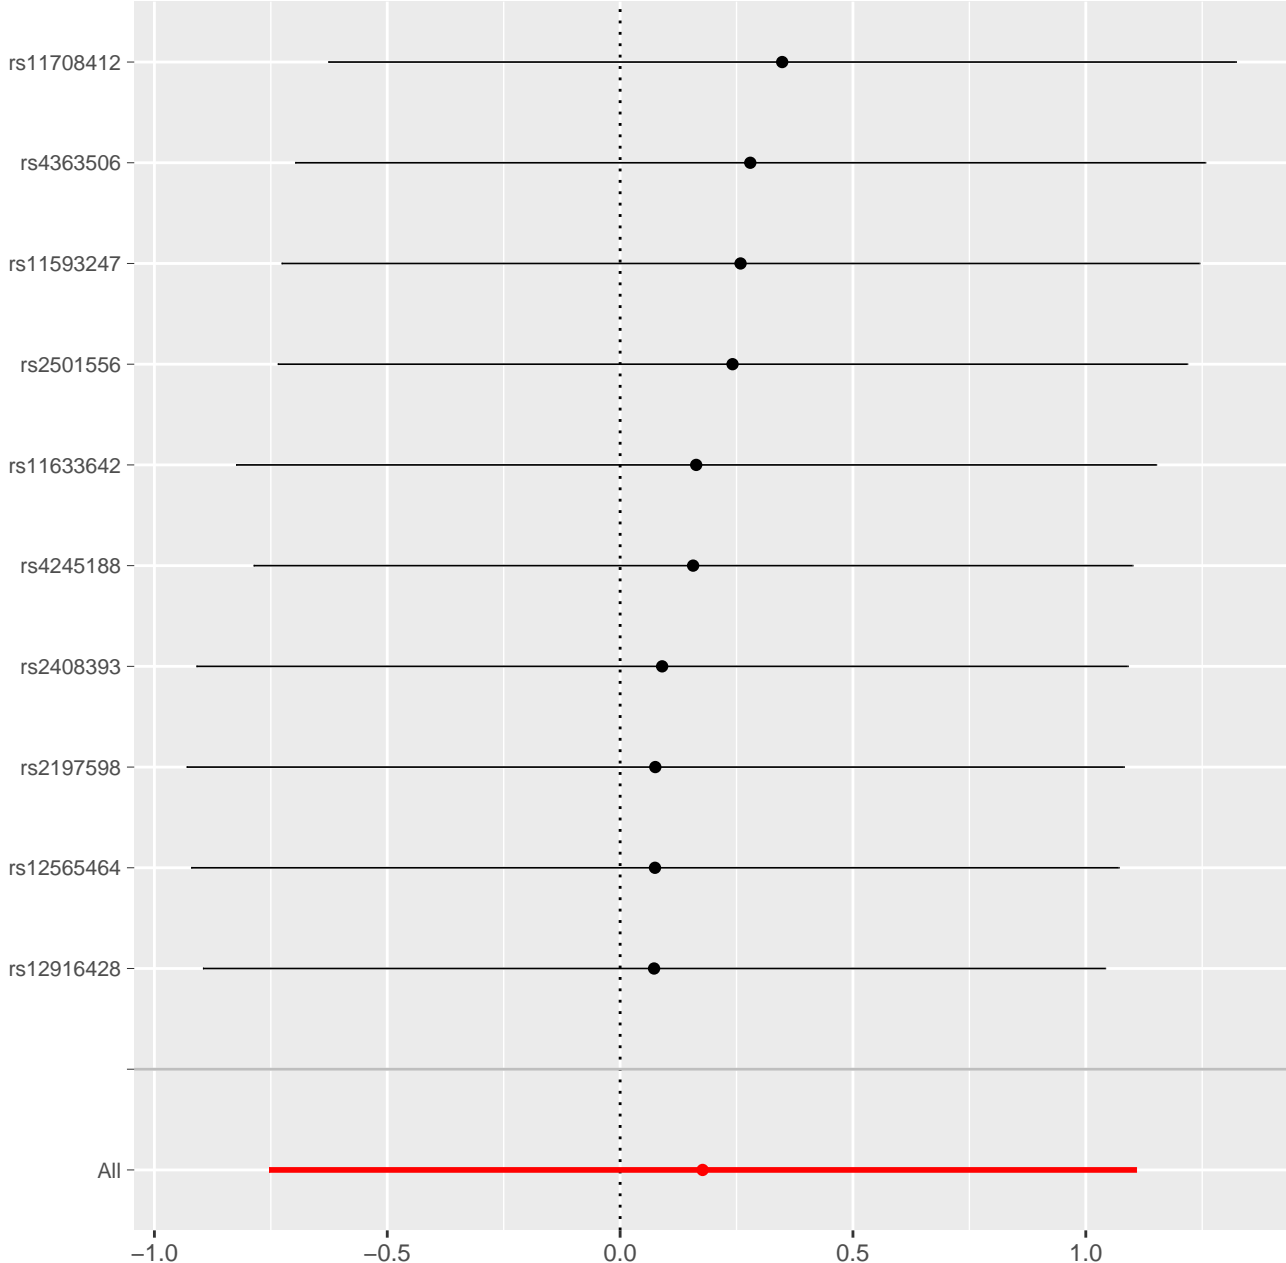

MR leave-one-out sensitivity analysis for 'M33131.metal.pos.txt.gz' on 'JUVEN\_ARTHR.gz'

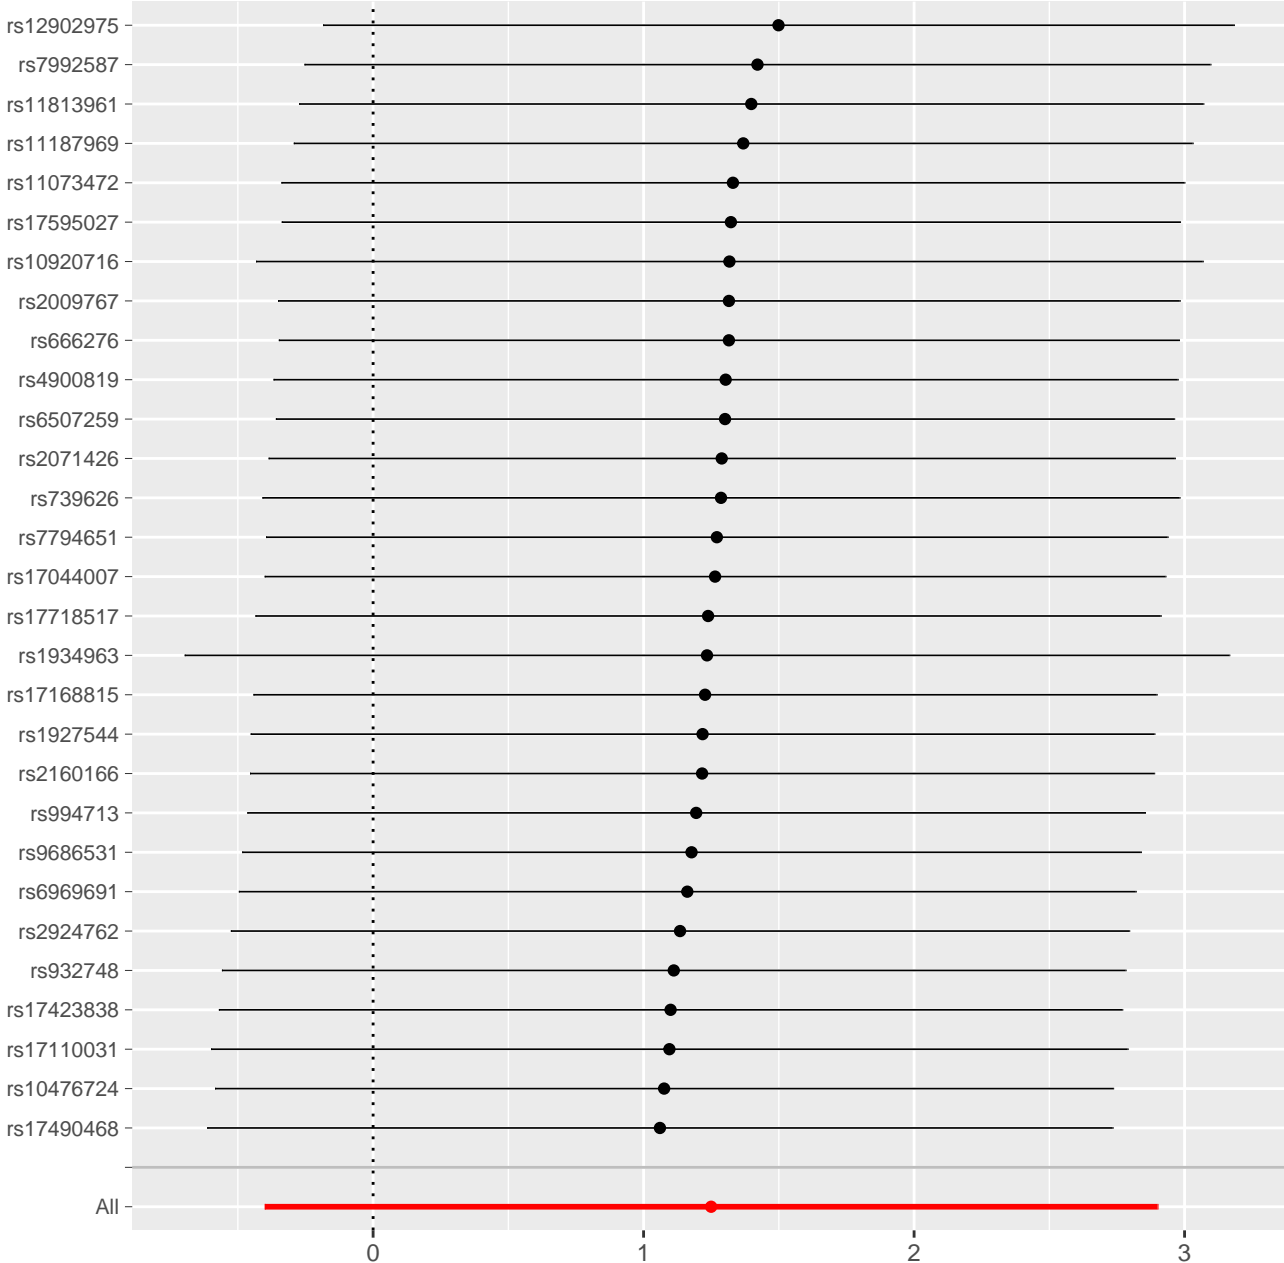

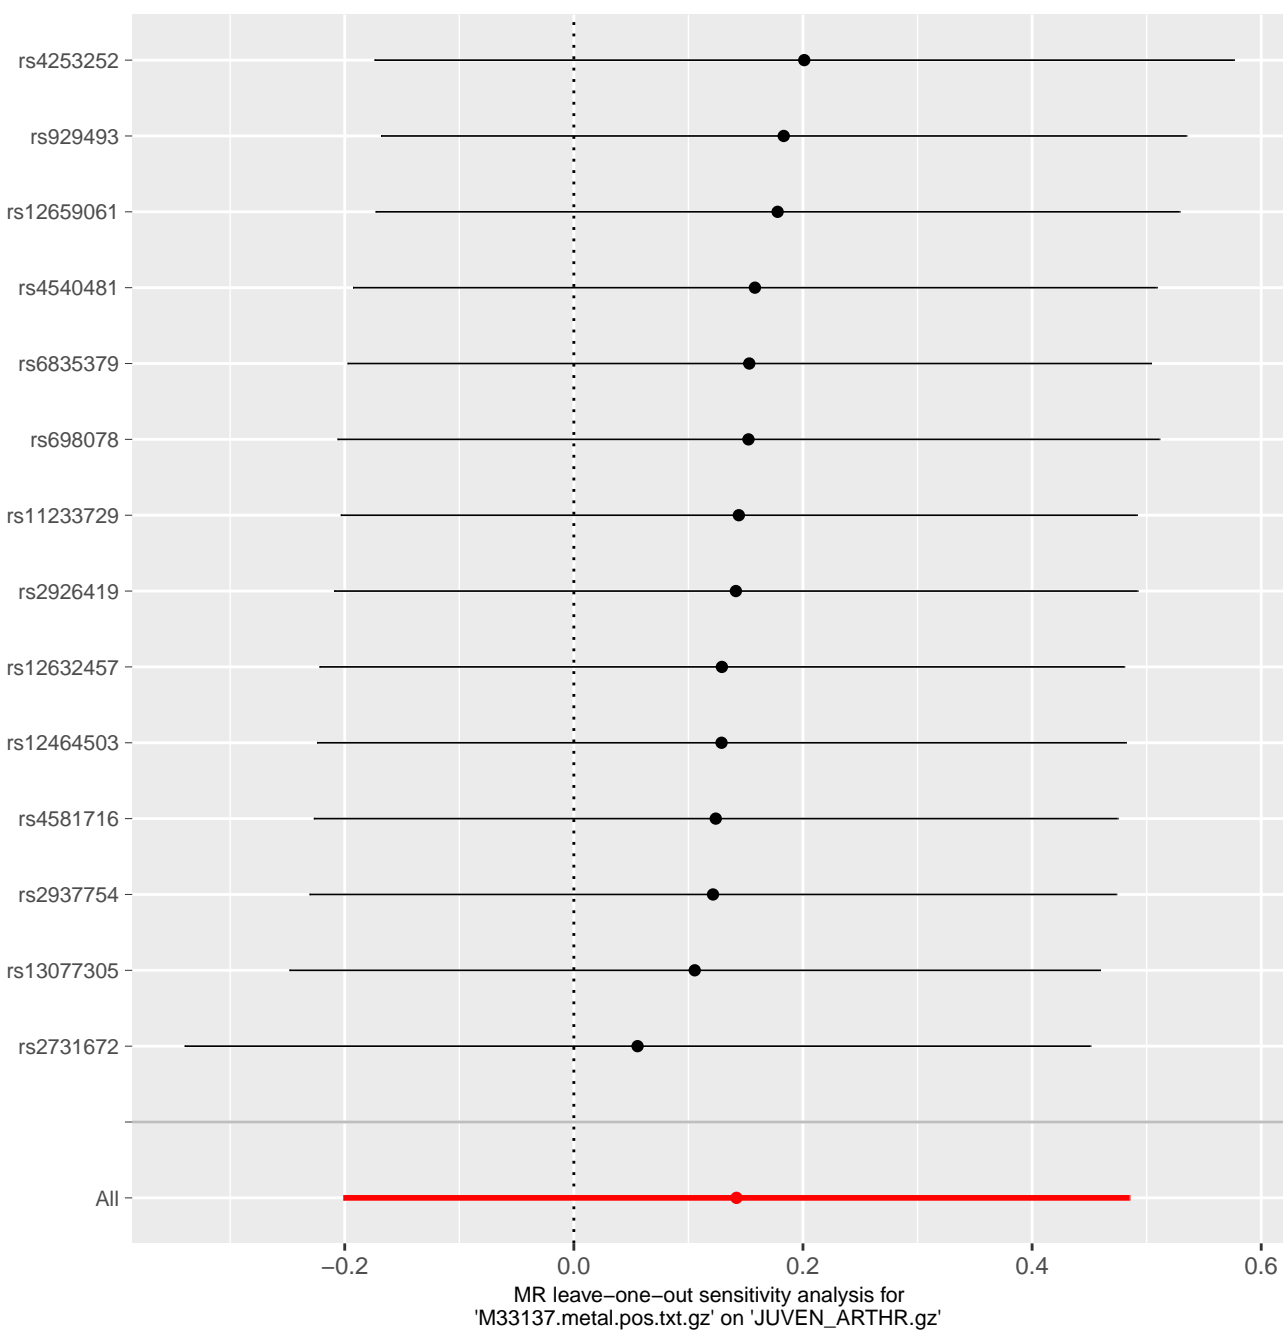

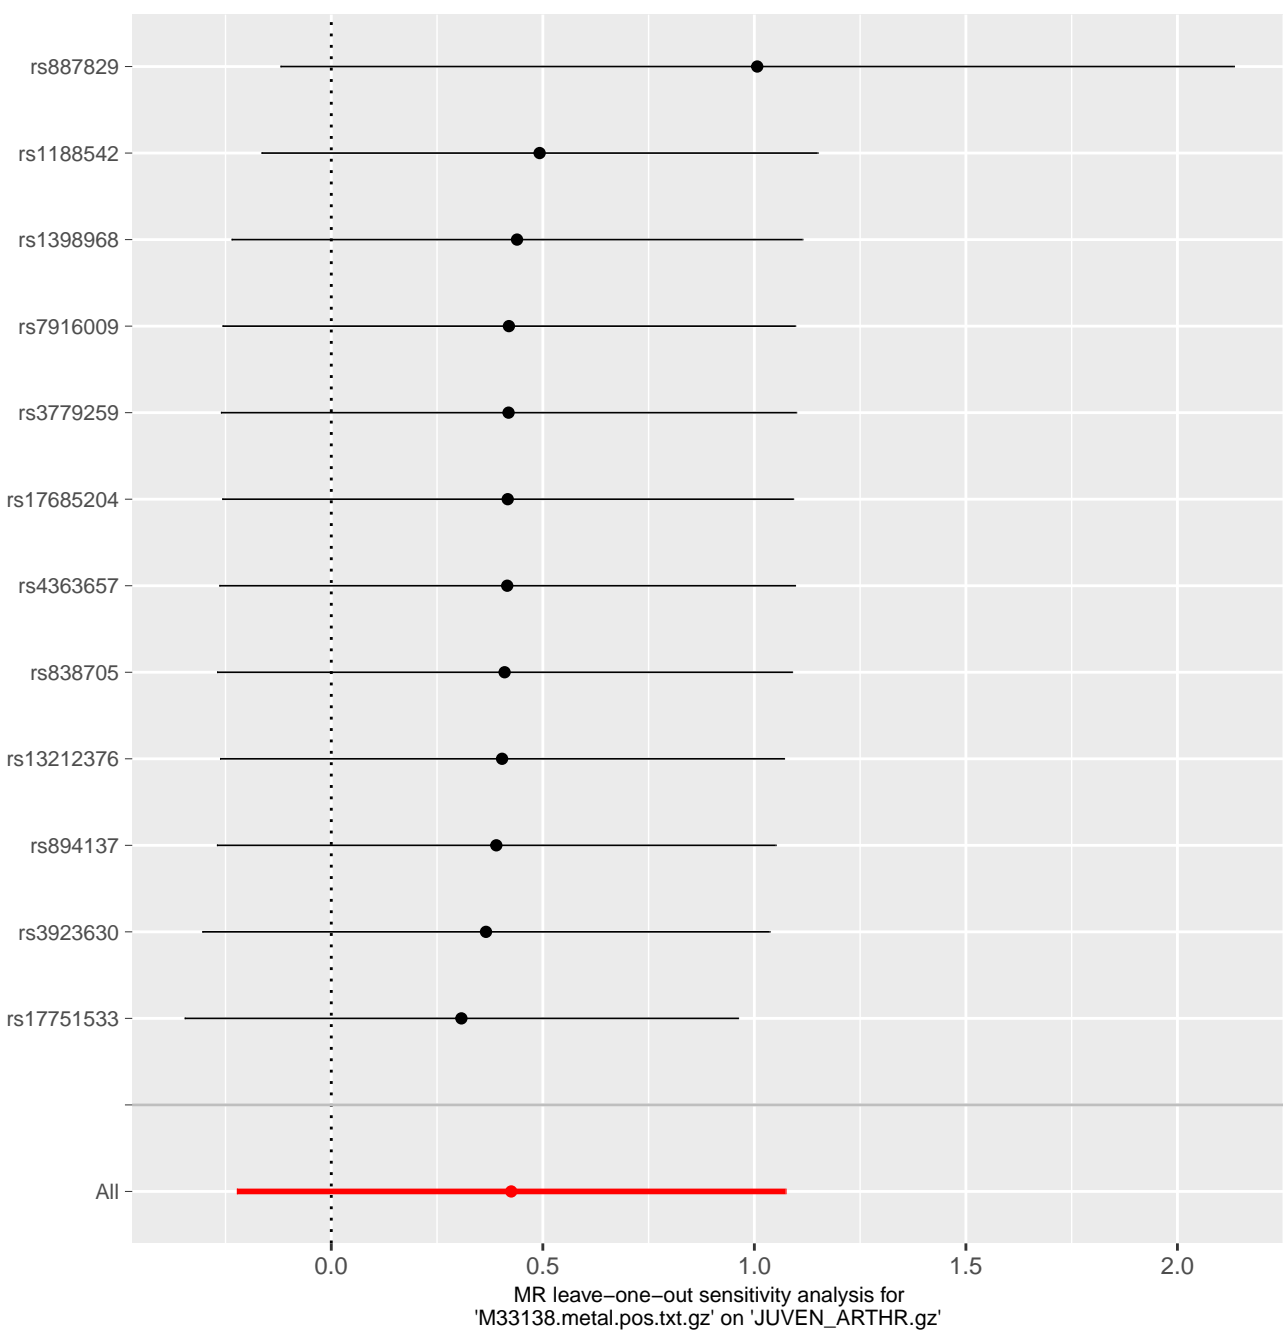



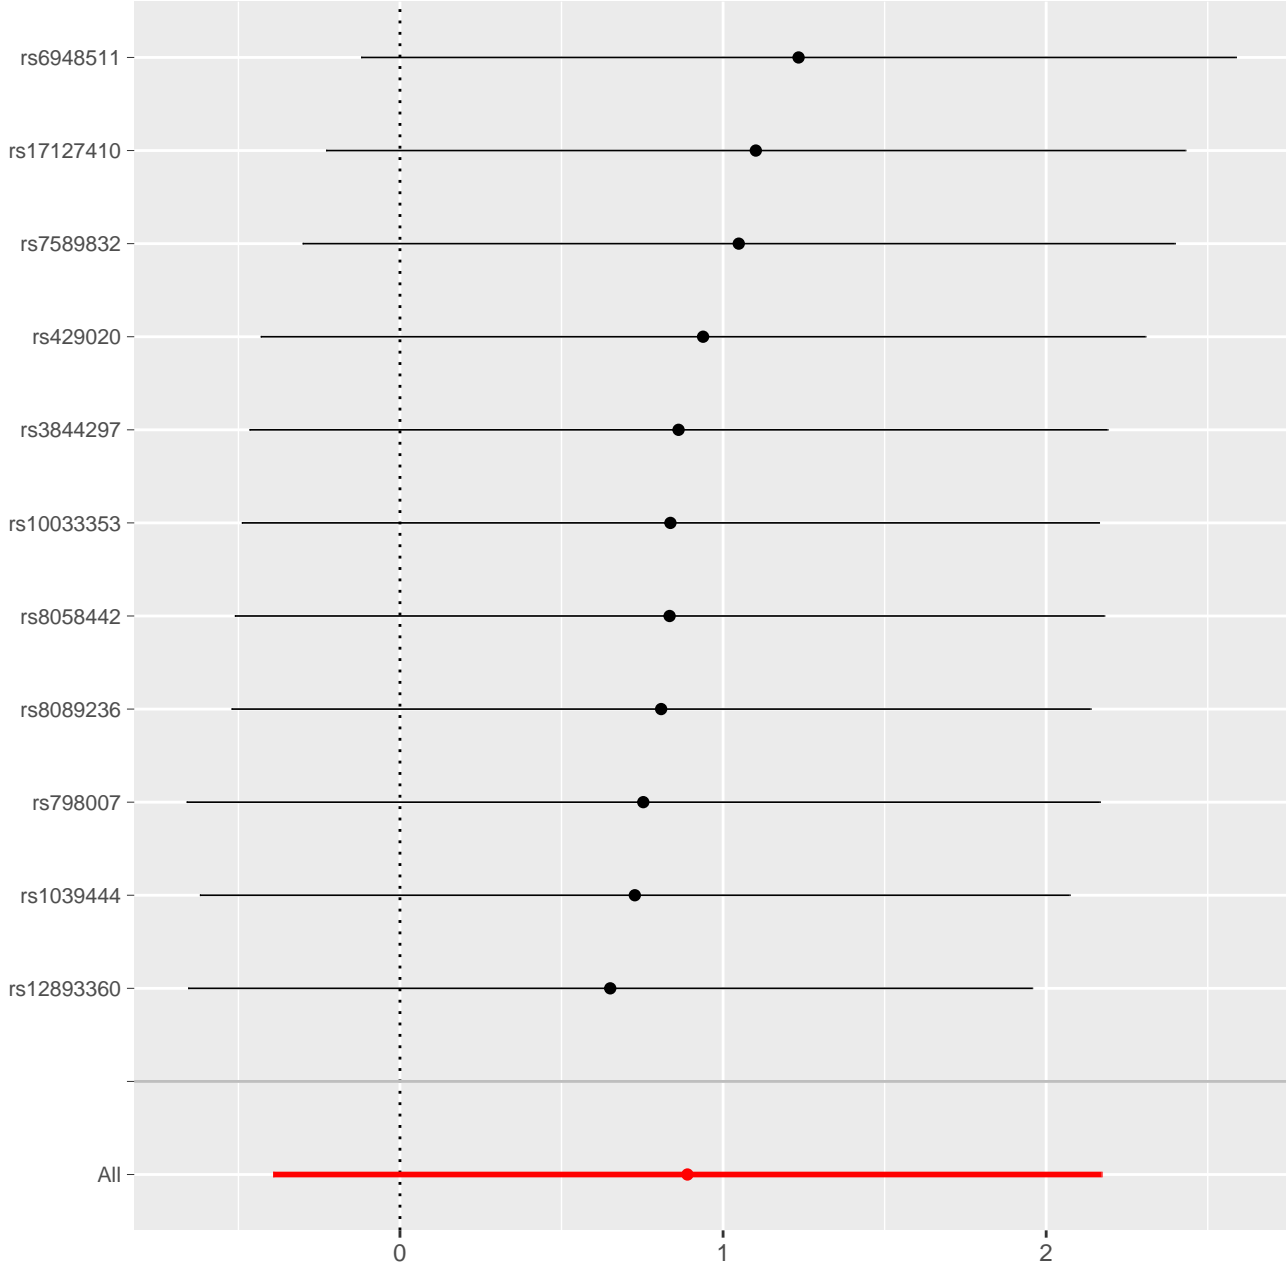

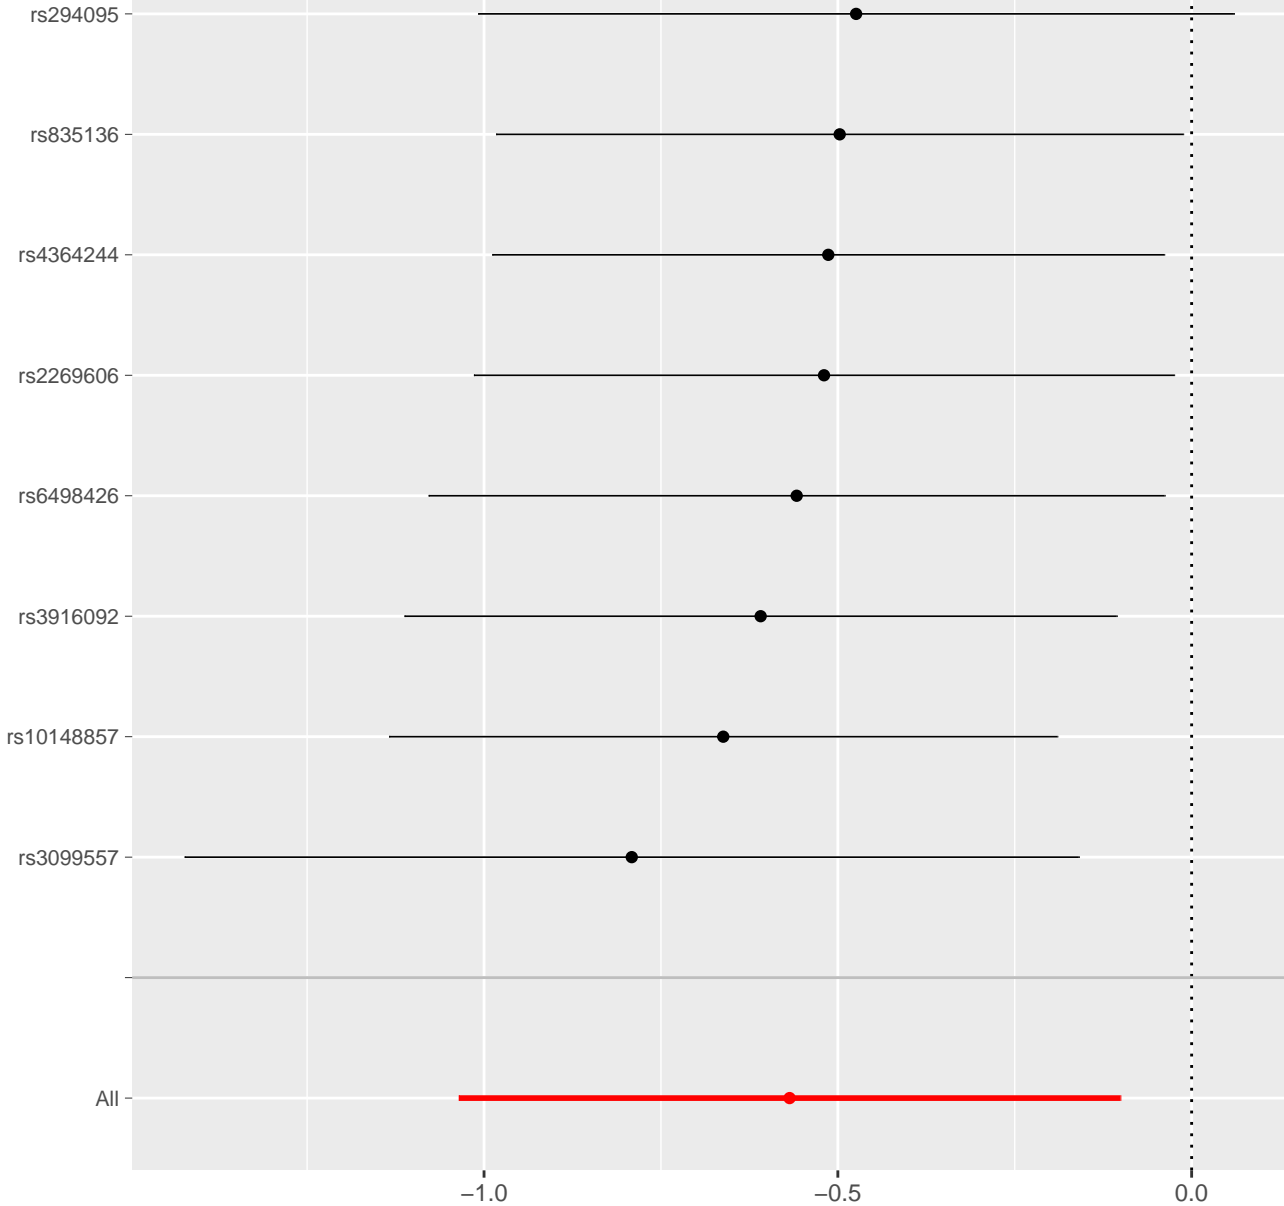

MR leave-one-out sensitivity analysis for 'M33144.metal.pos.txt.gz' on 'JUVEN\_ARTHR.gz'

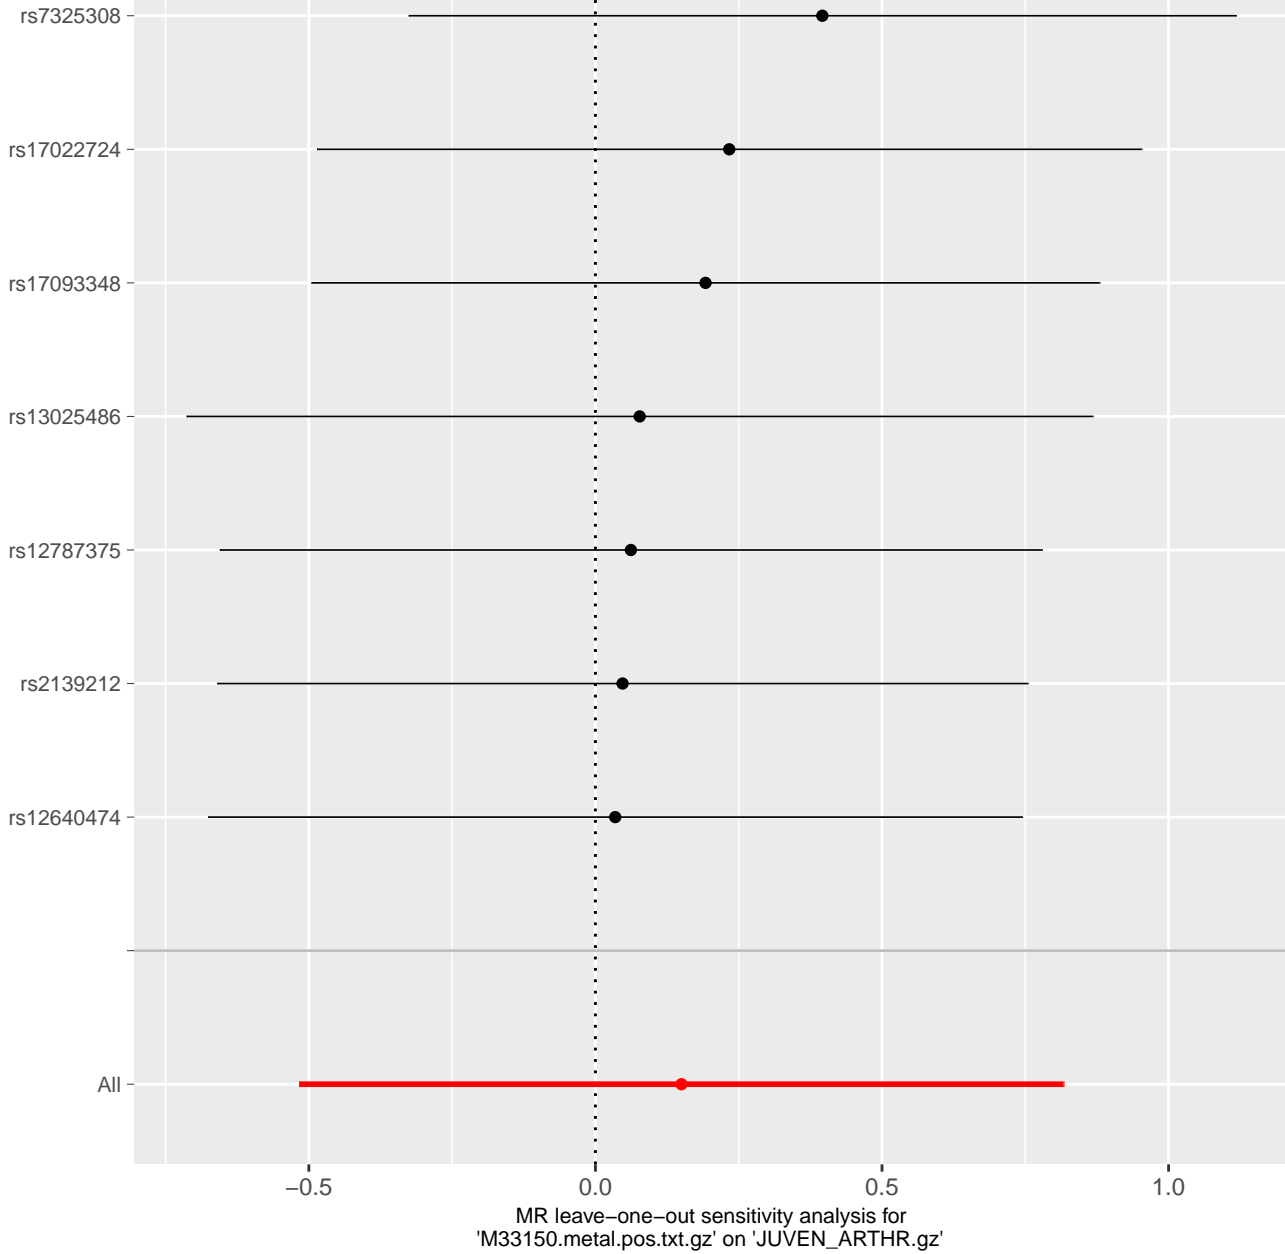

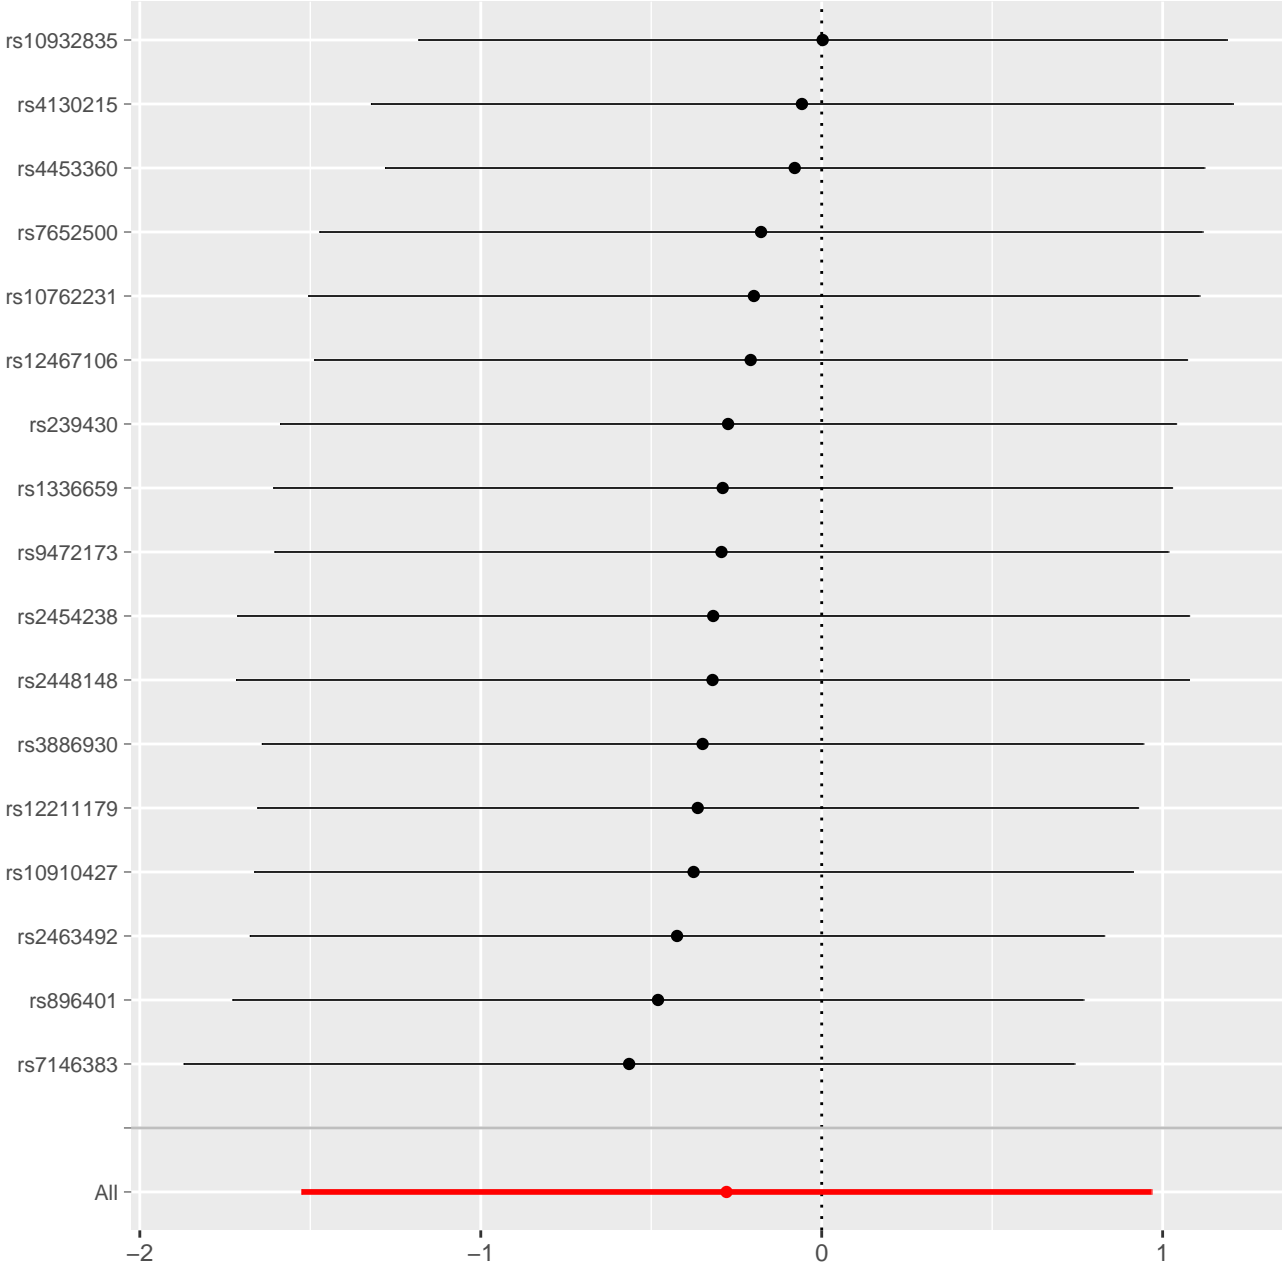

MR leave-one-out sensitivity analysis for 'M33163.metal.pos.txt.gz' on 'JUVEN\_ARTHR.gz'

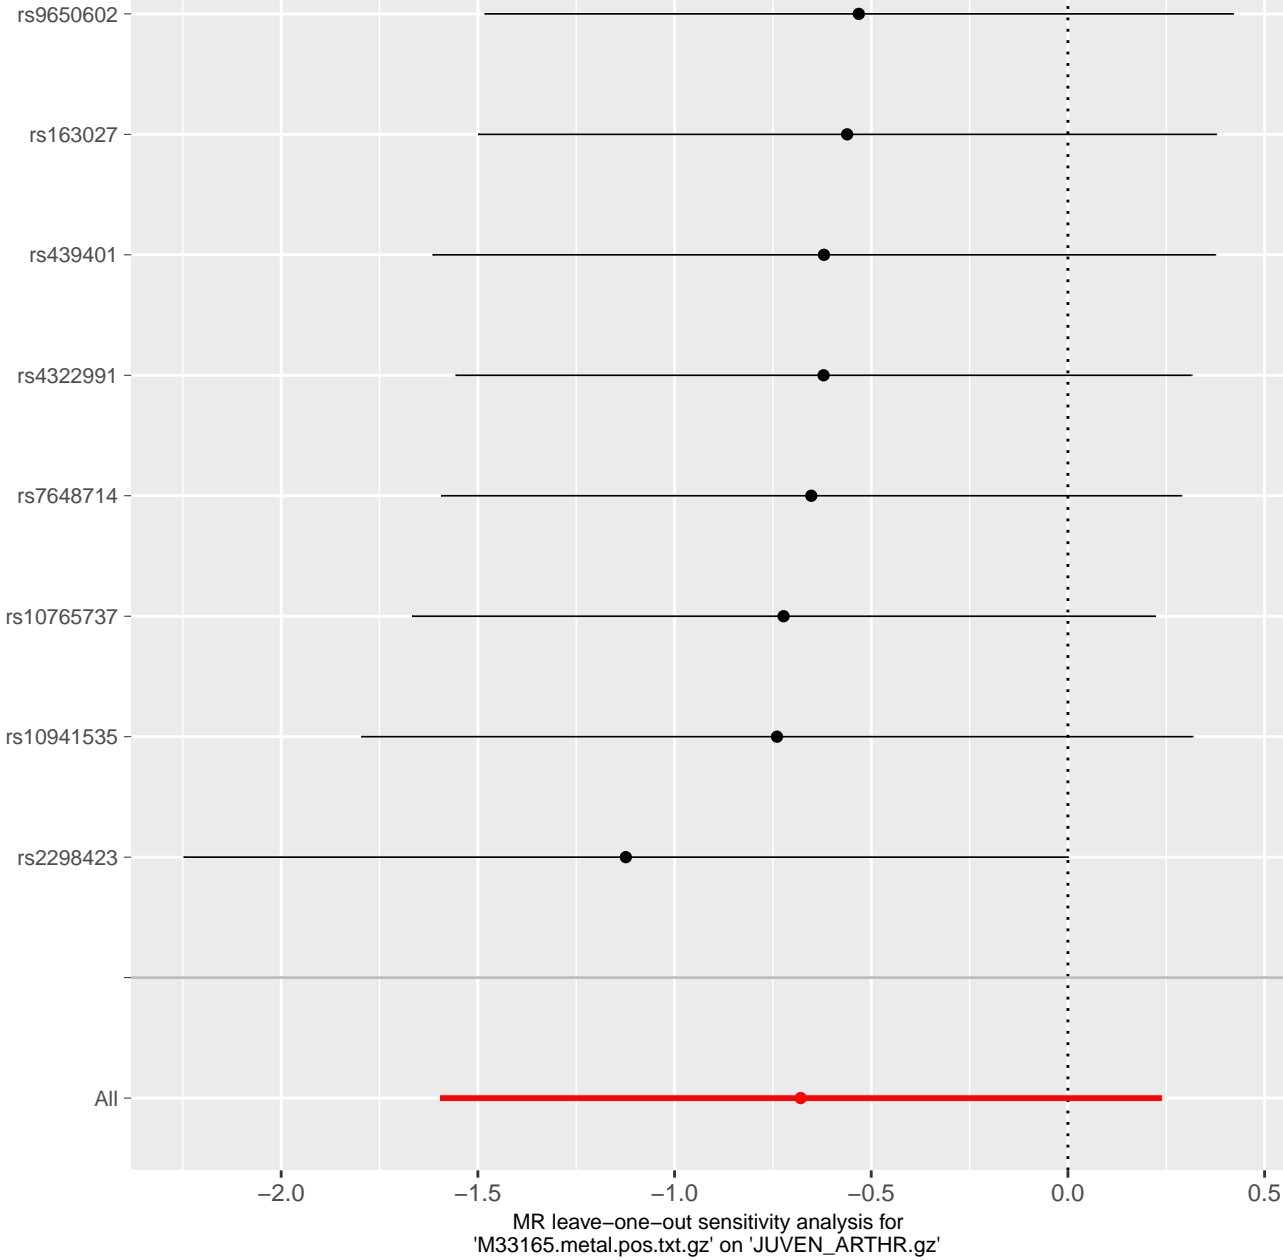

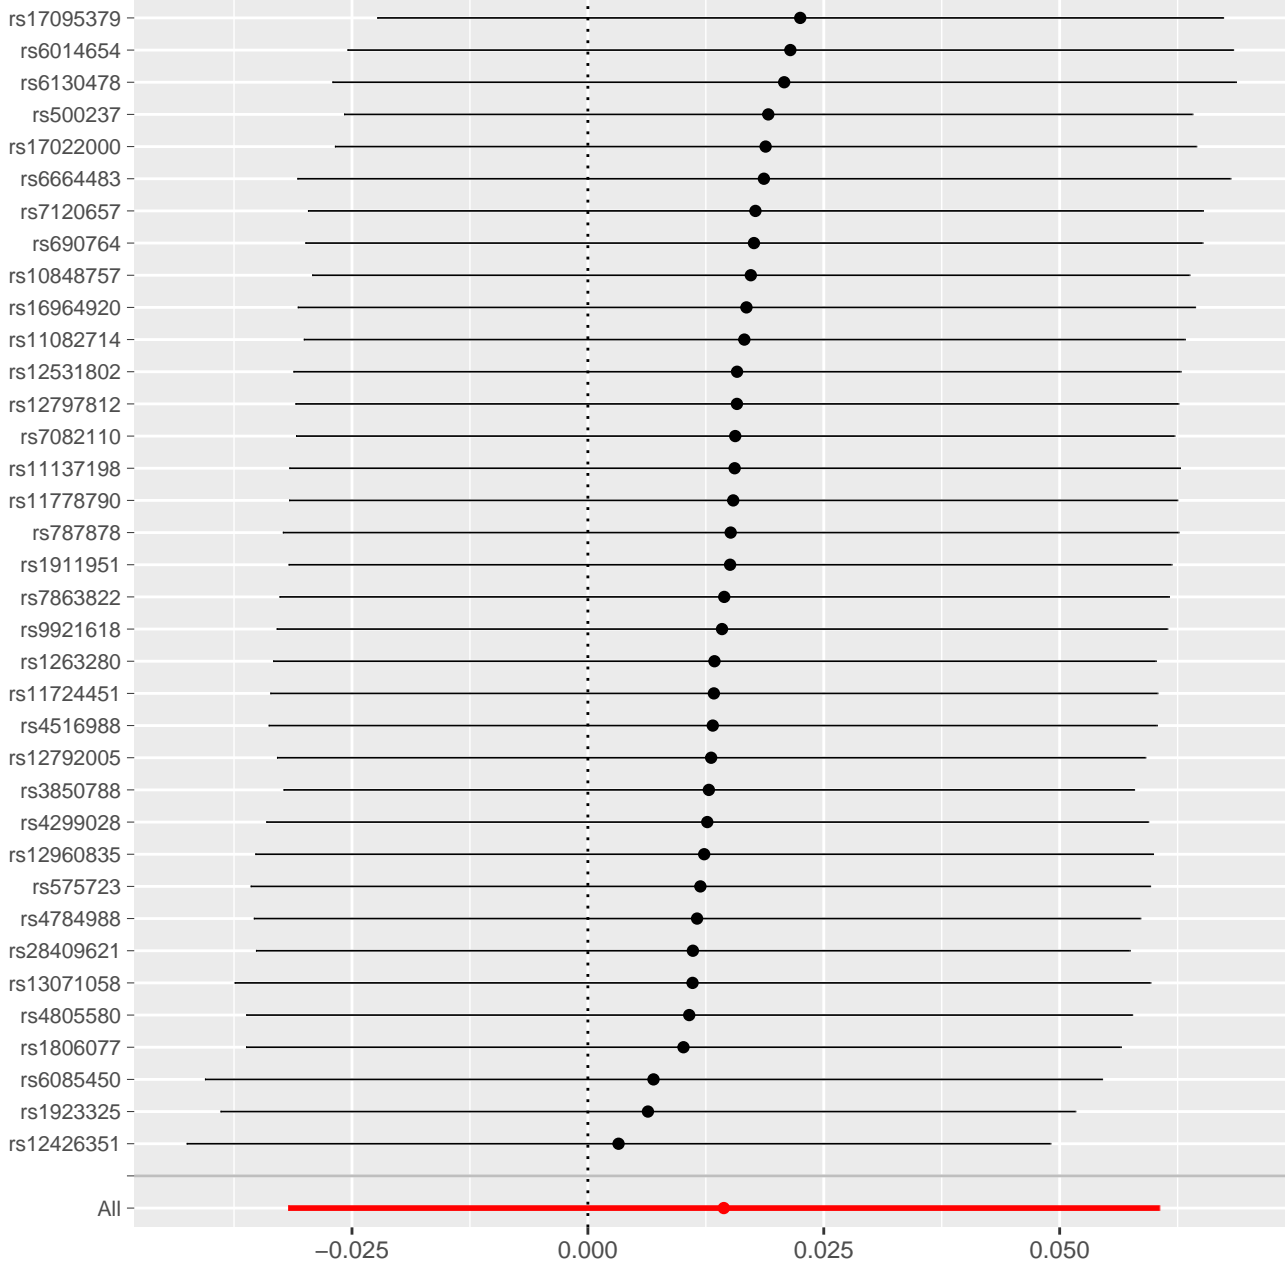

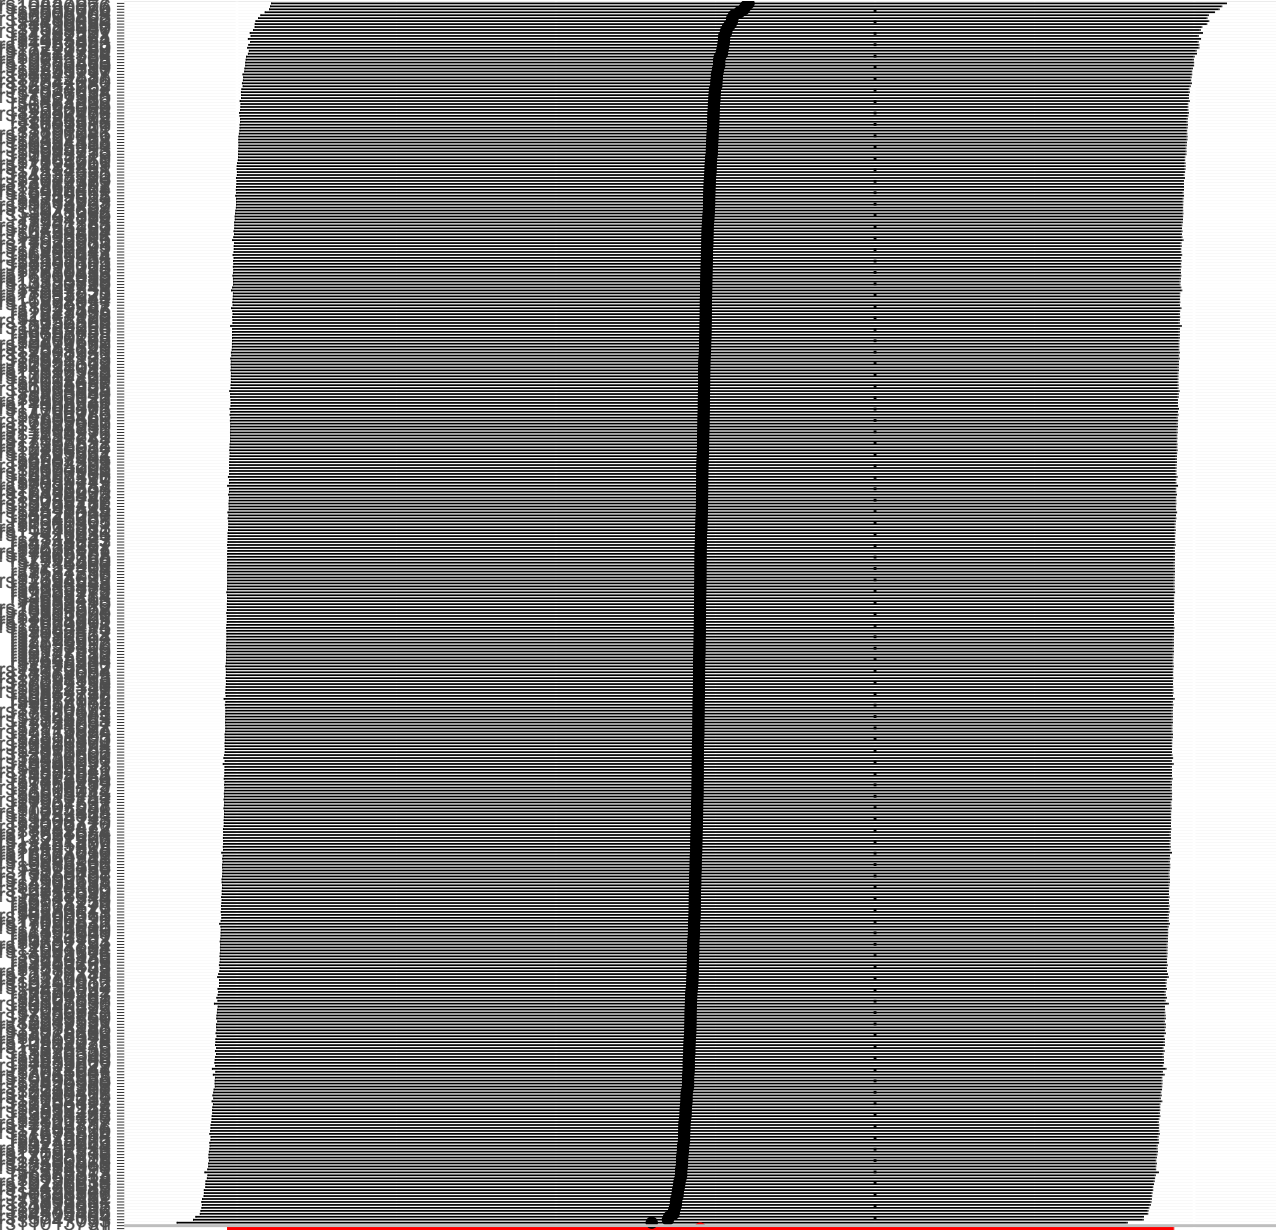

-0.04

-0.02

0.00

0.02

MR leave-one-out sensitivity analysis for  
'M33178.metal.pos.txt.gz' on 'JUVEN\_ARTHR.gz'

rs3780277

rs2697339

rs8017593

All

-1

0

1

2

MR leave-one-out sensitivity analysis for  
'M33188.metal.pos.txt.gz' on 'JUVEN\_ARTHR.gz'

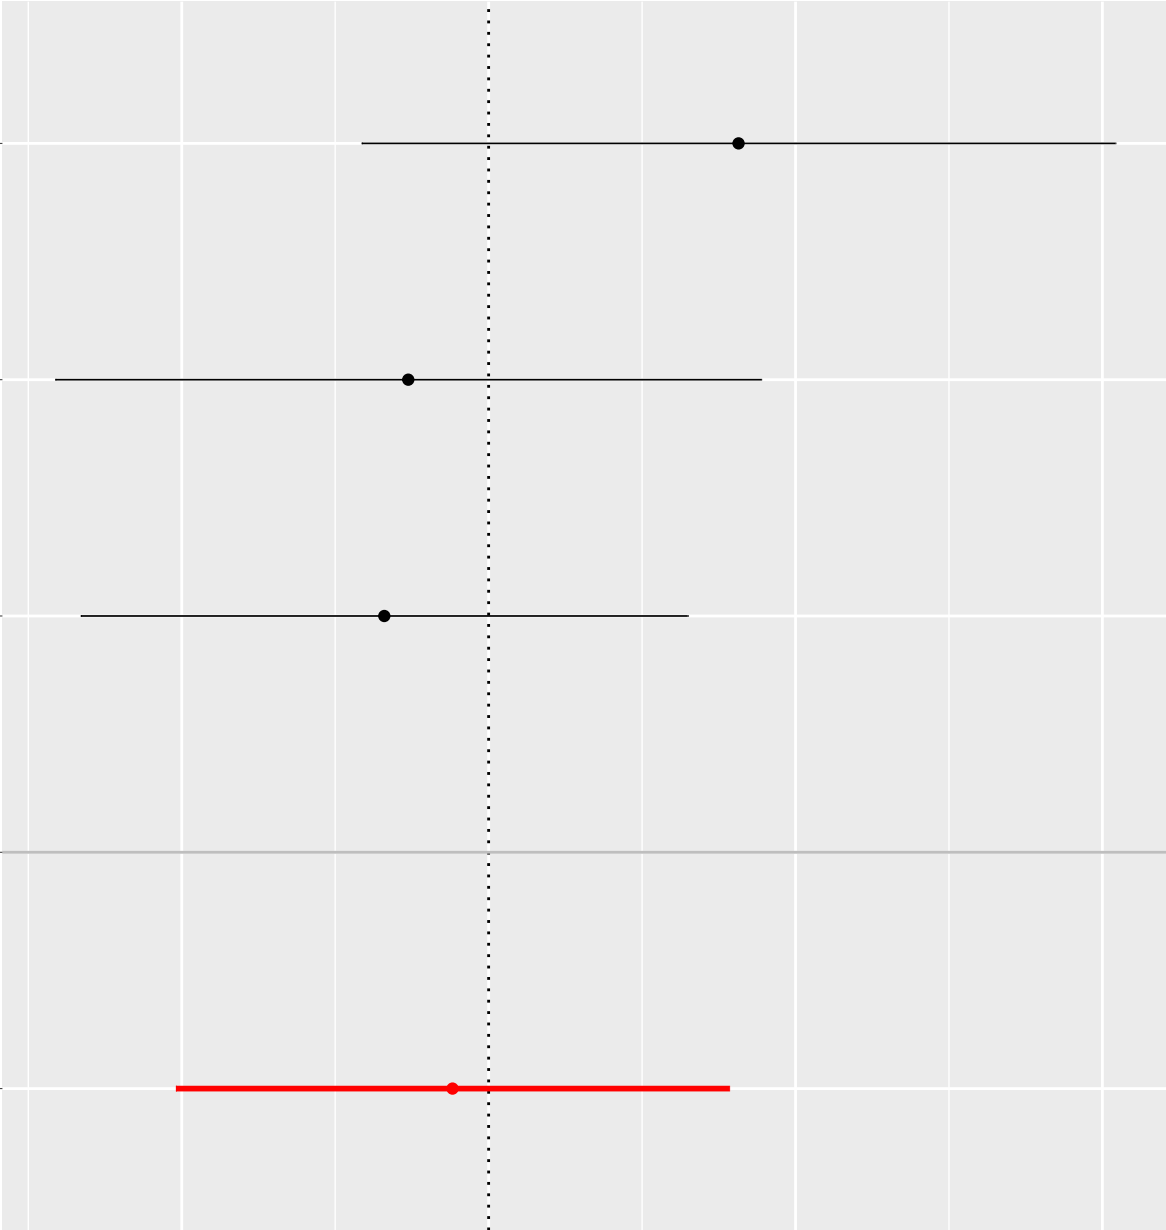



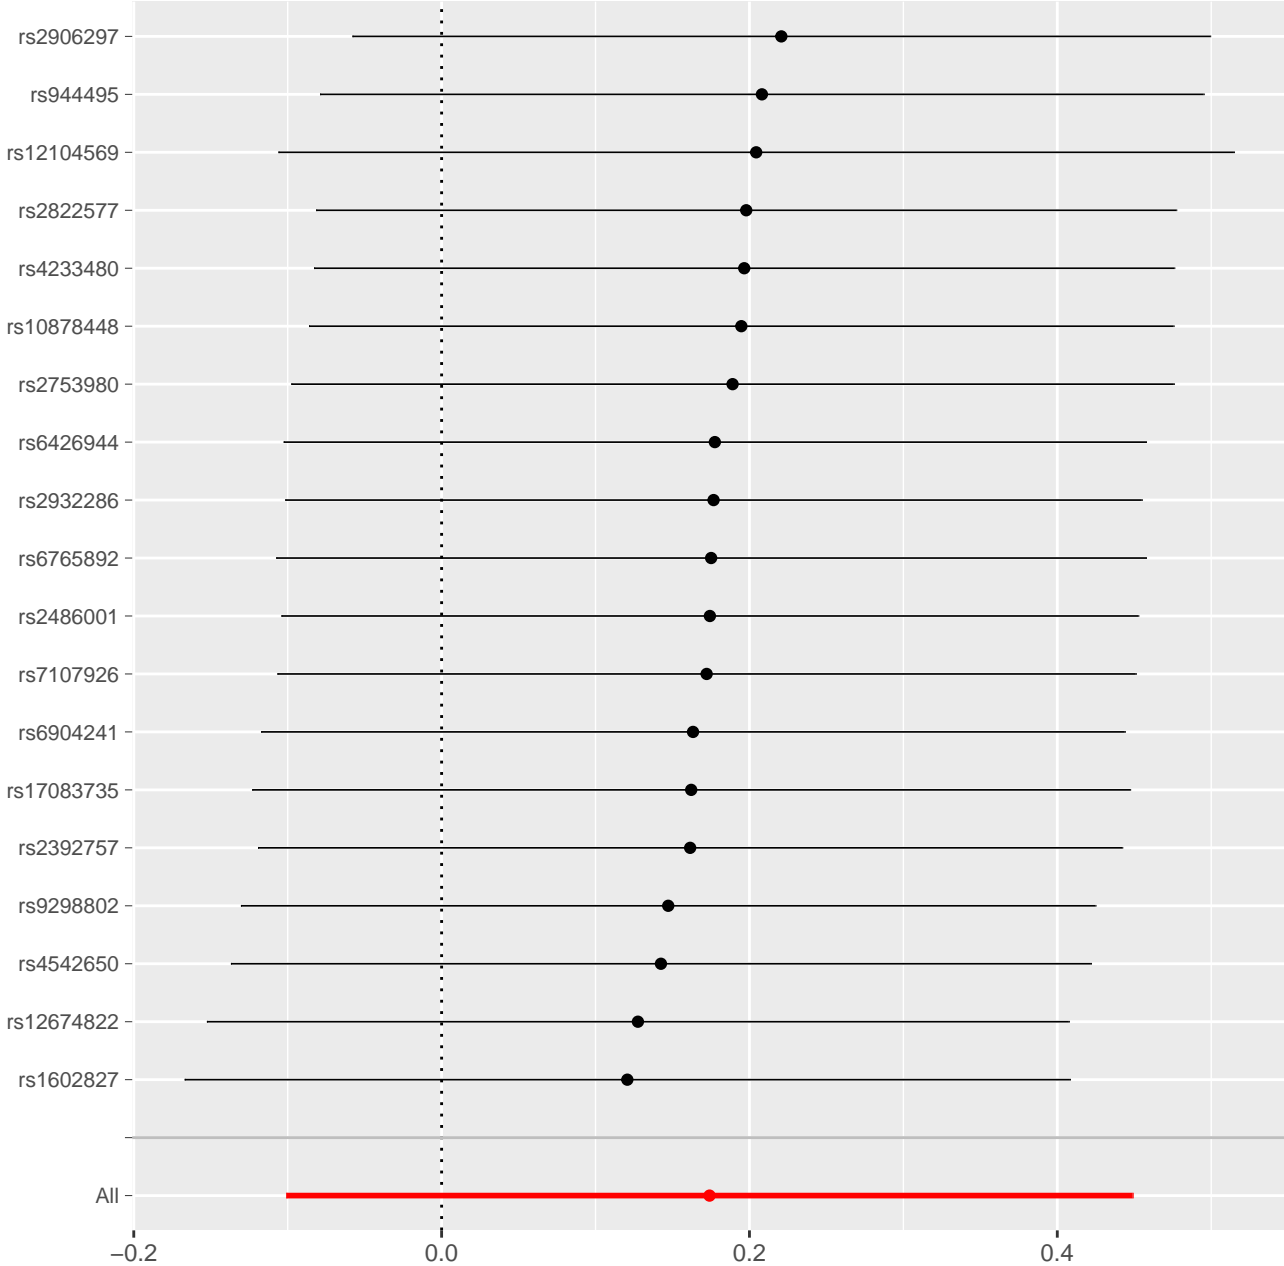

MR leave-one-out sensitivity analysis for 'M33190.metal.pos.txt.gz' on 'JUVEN\_ARTHR.gz'

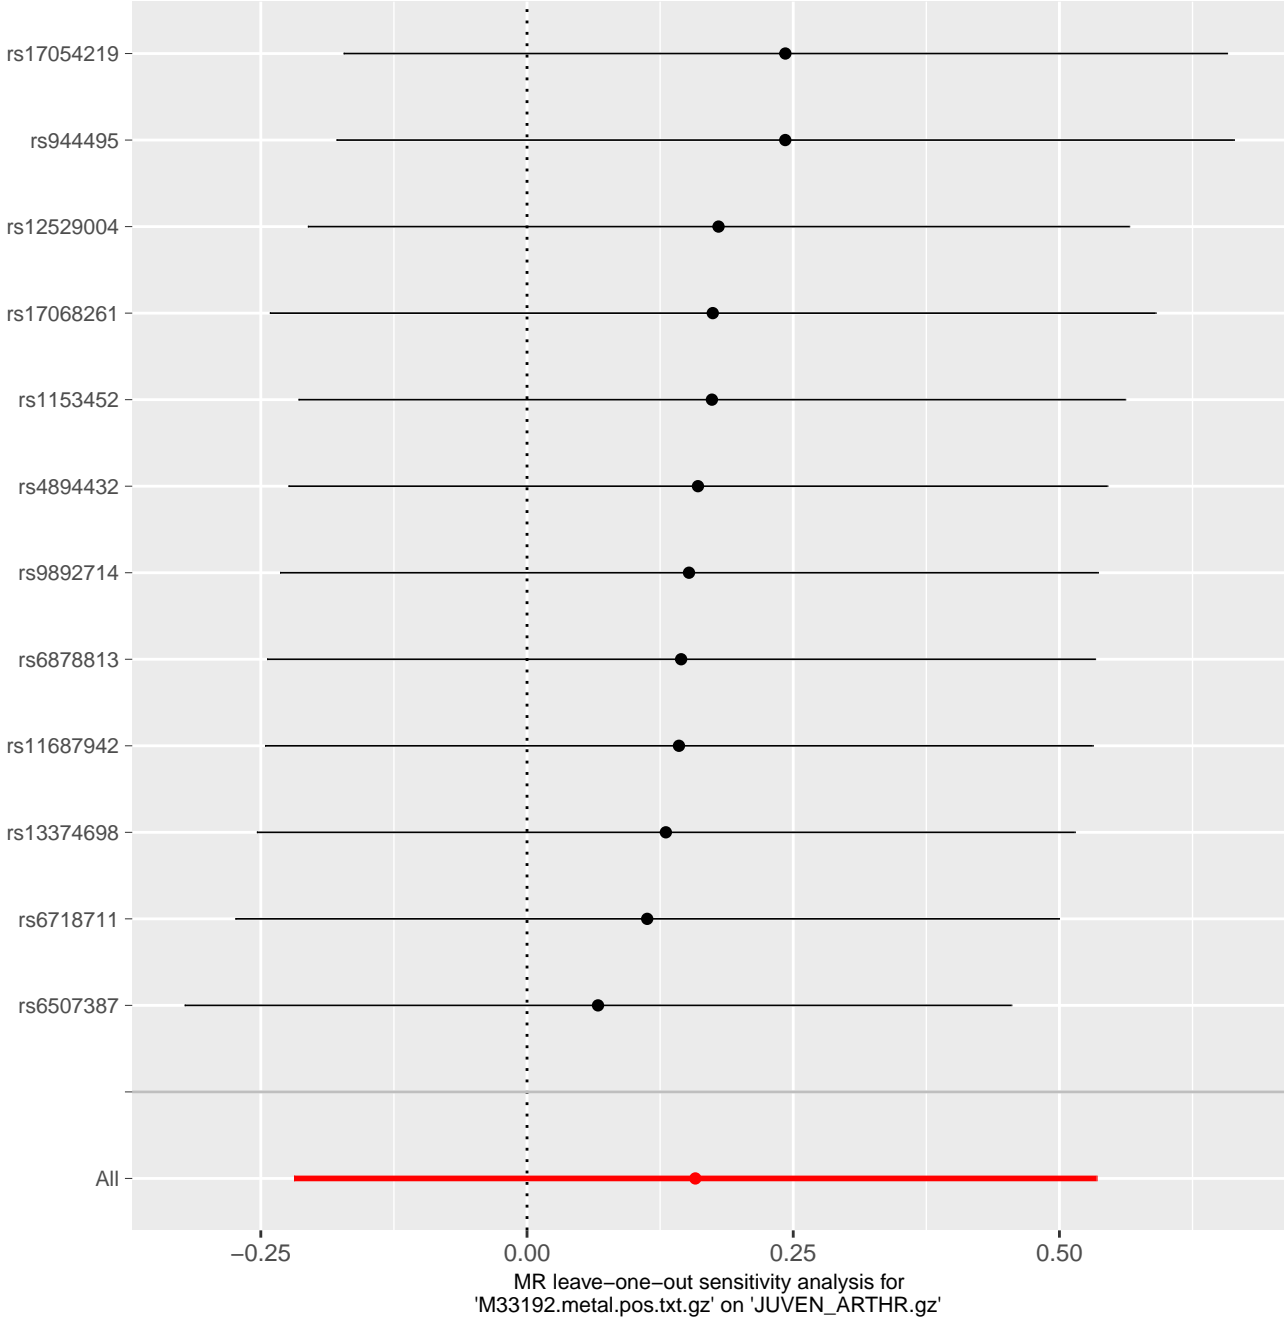

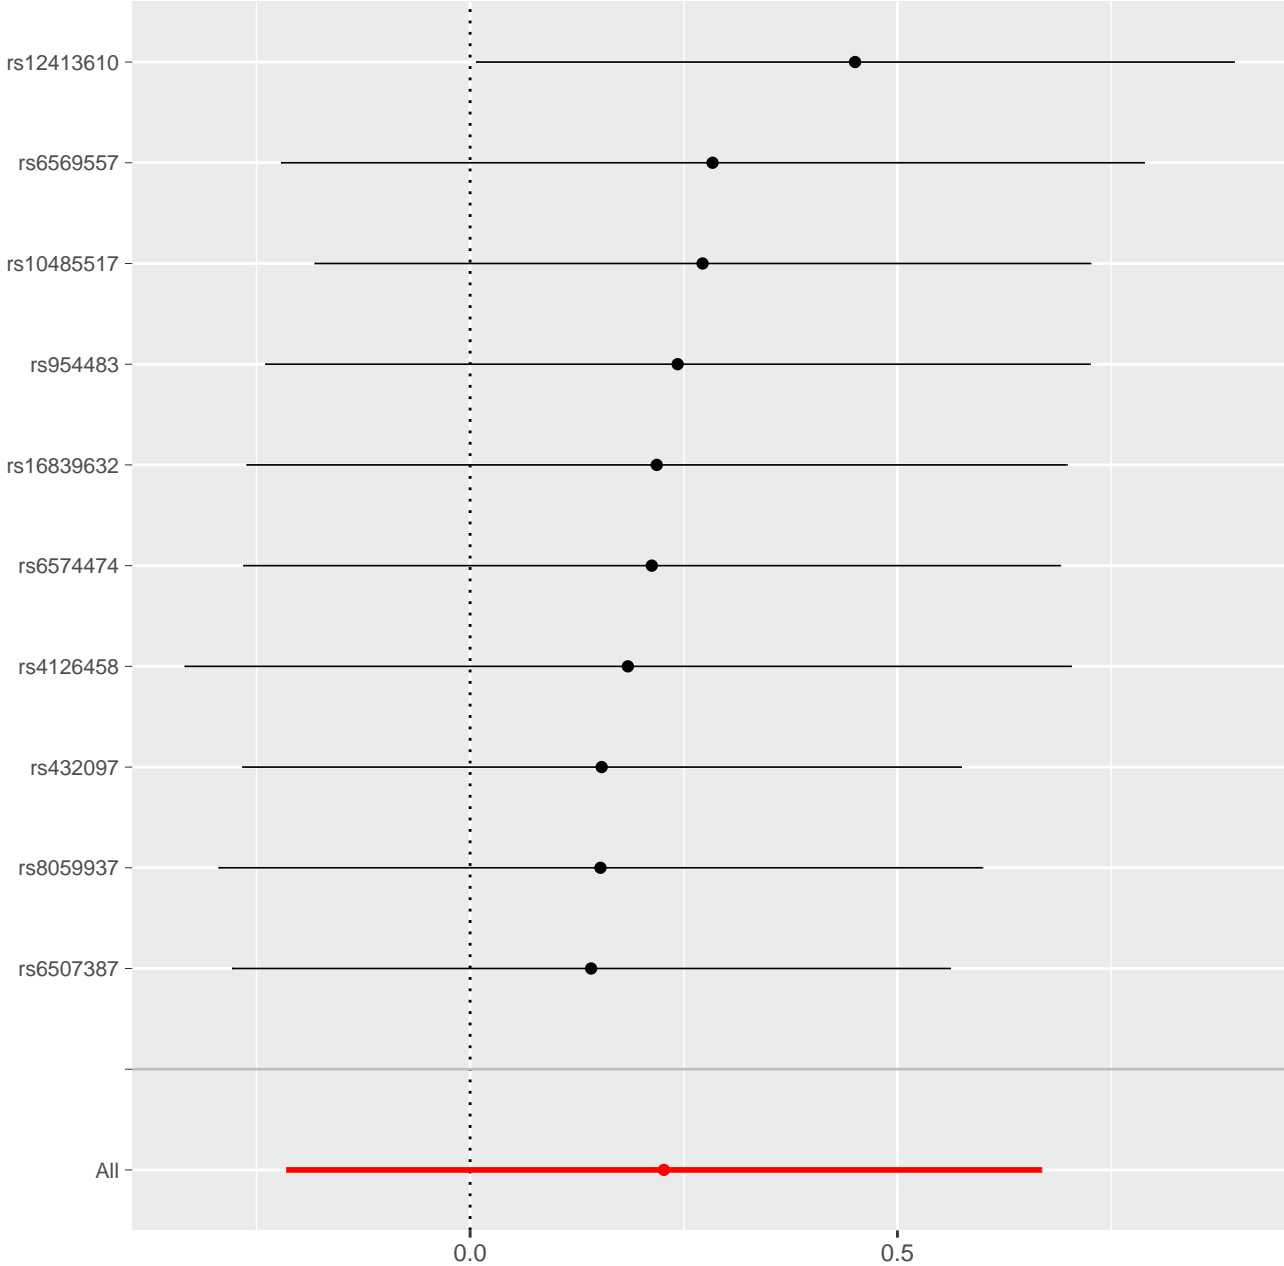

rs17556249

rs2298126

rs2493950

rs12566852

rs11192313

All

-0.5

0.0

0.5

1.0

MR leave-one-out sensitivity analysis for  
'M33195.metal.pos.txt.gz' on 'JUVEN\_ARTHR.gz'

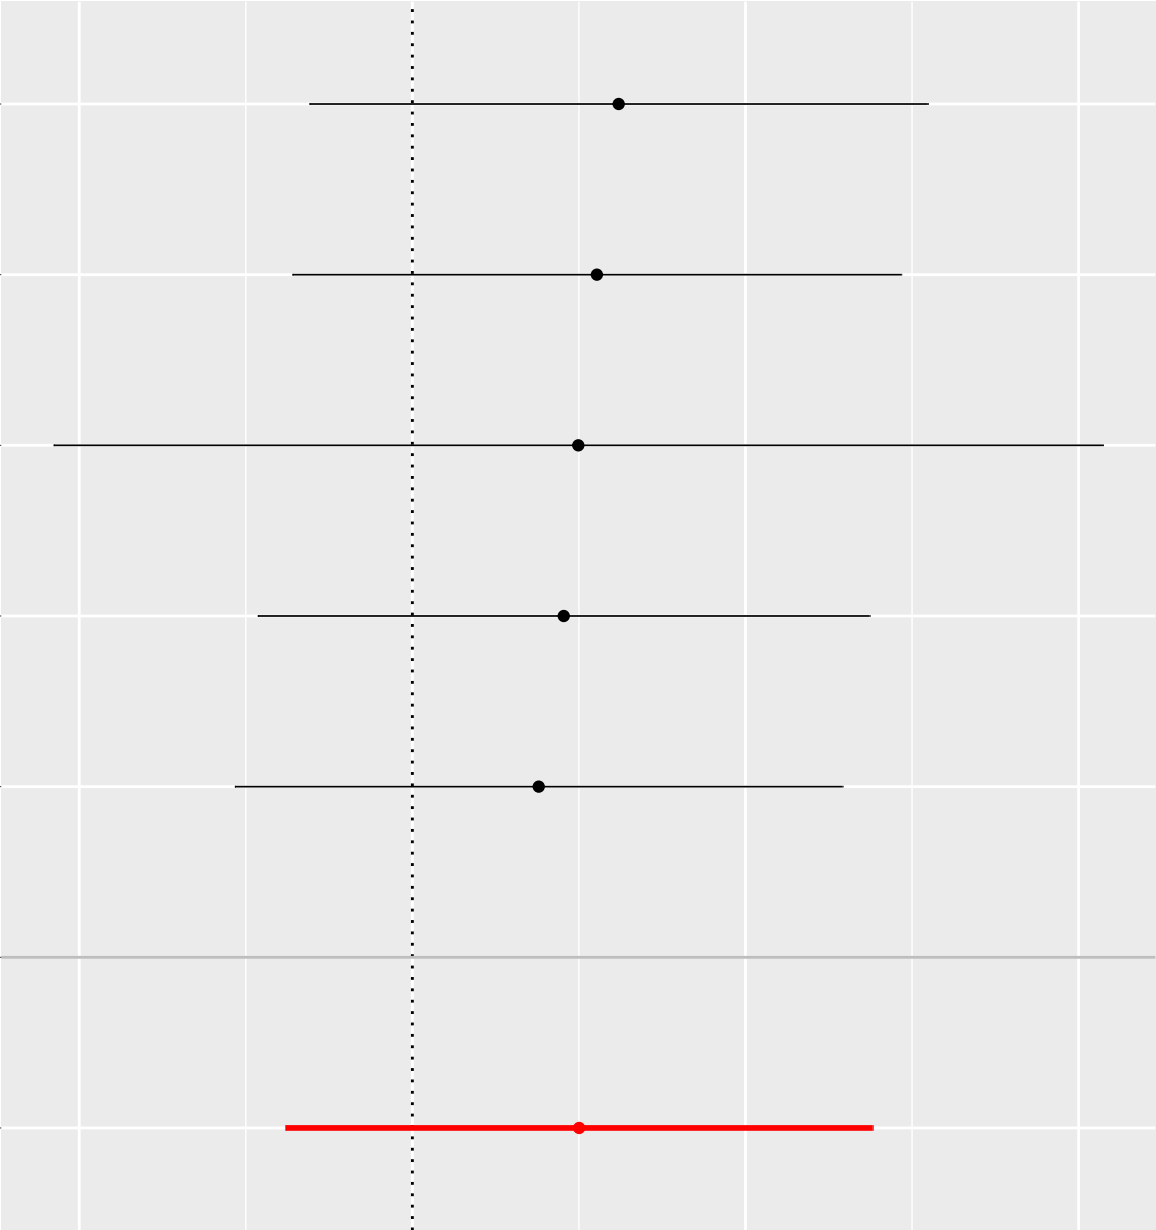

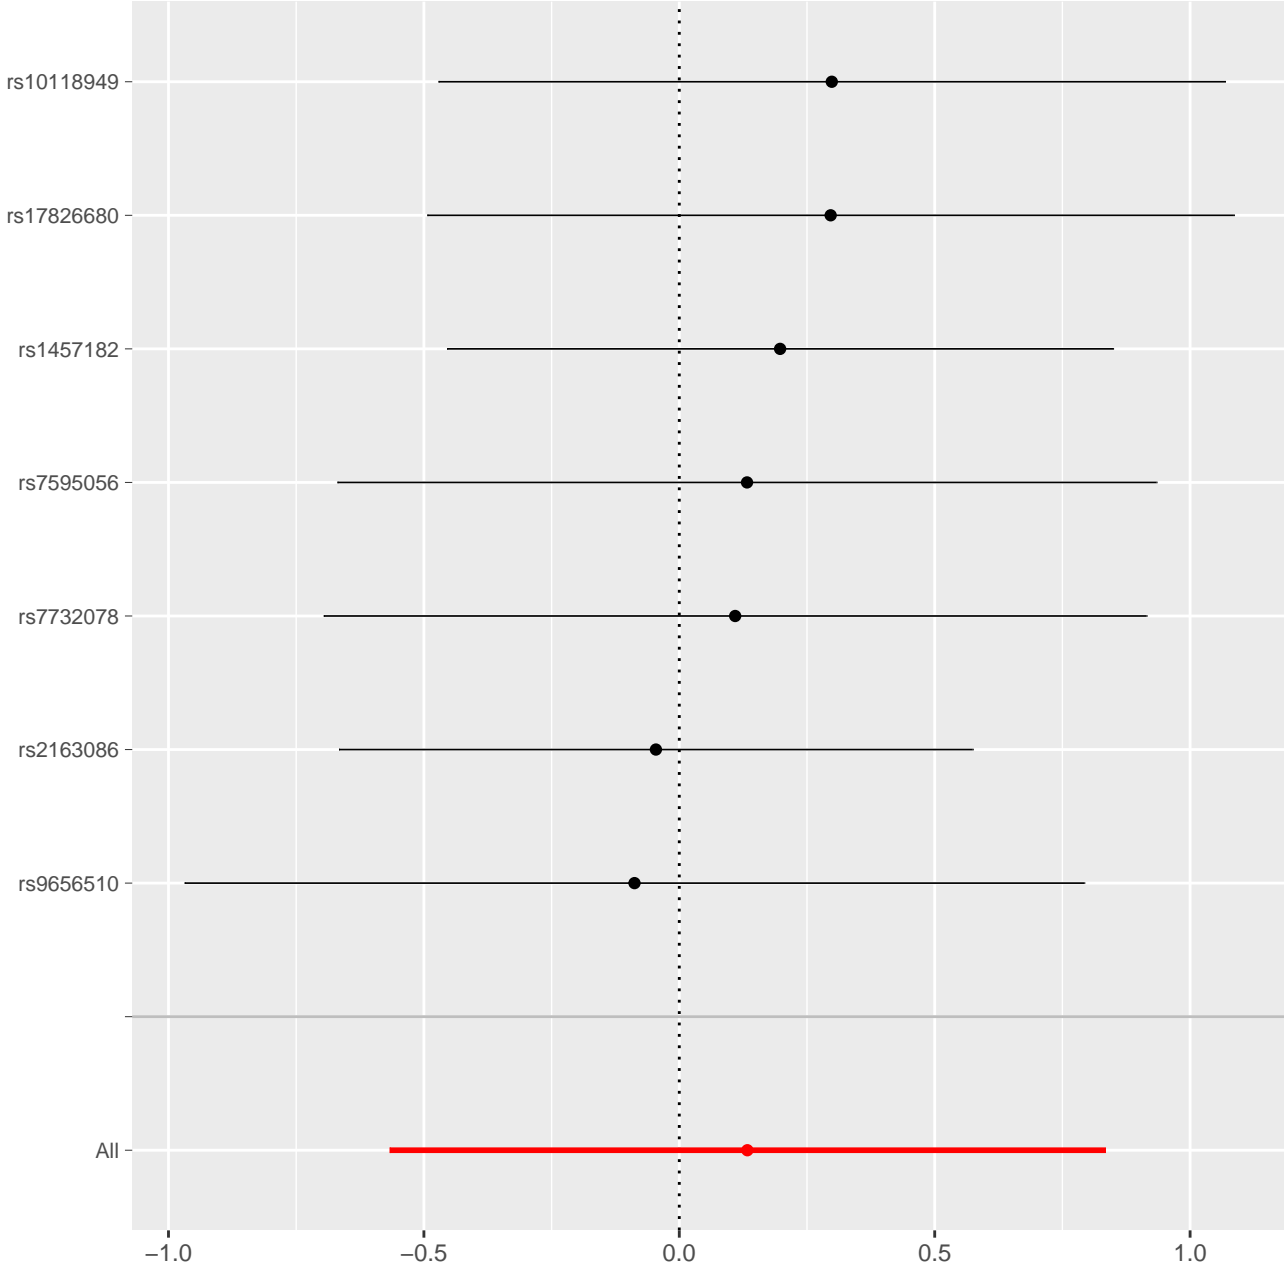

MR leave-one-out sensitivity analysis for 'M33197.metal.pos.txt.gz' on 'JUVEN\_ARTHR.gz'

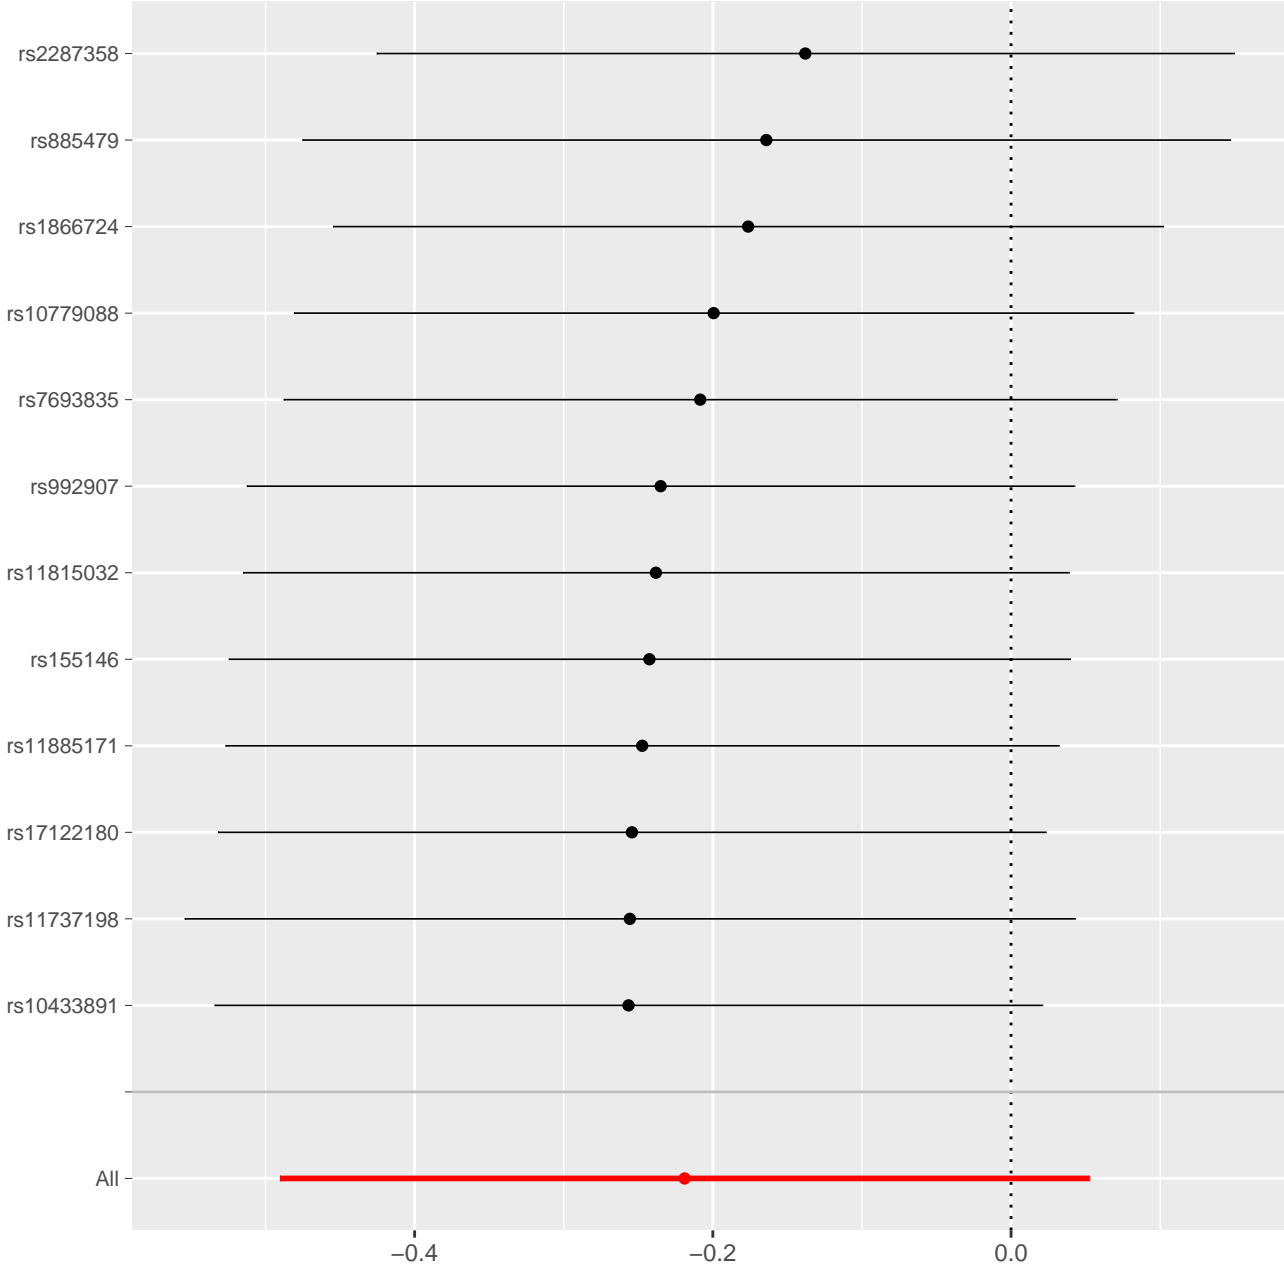

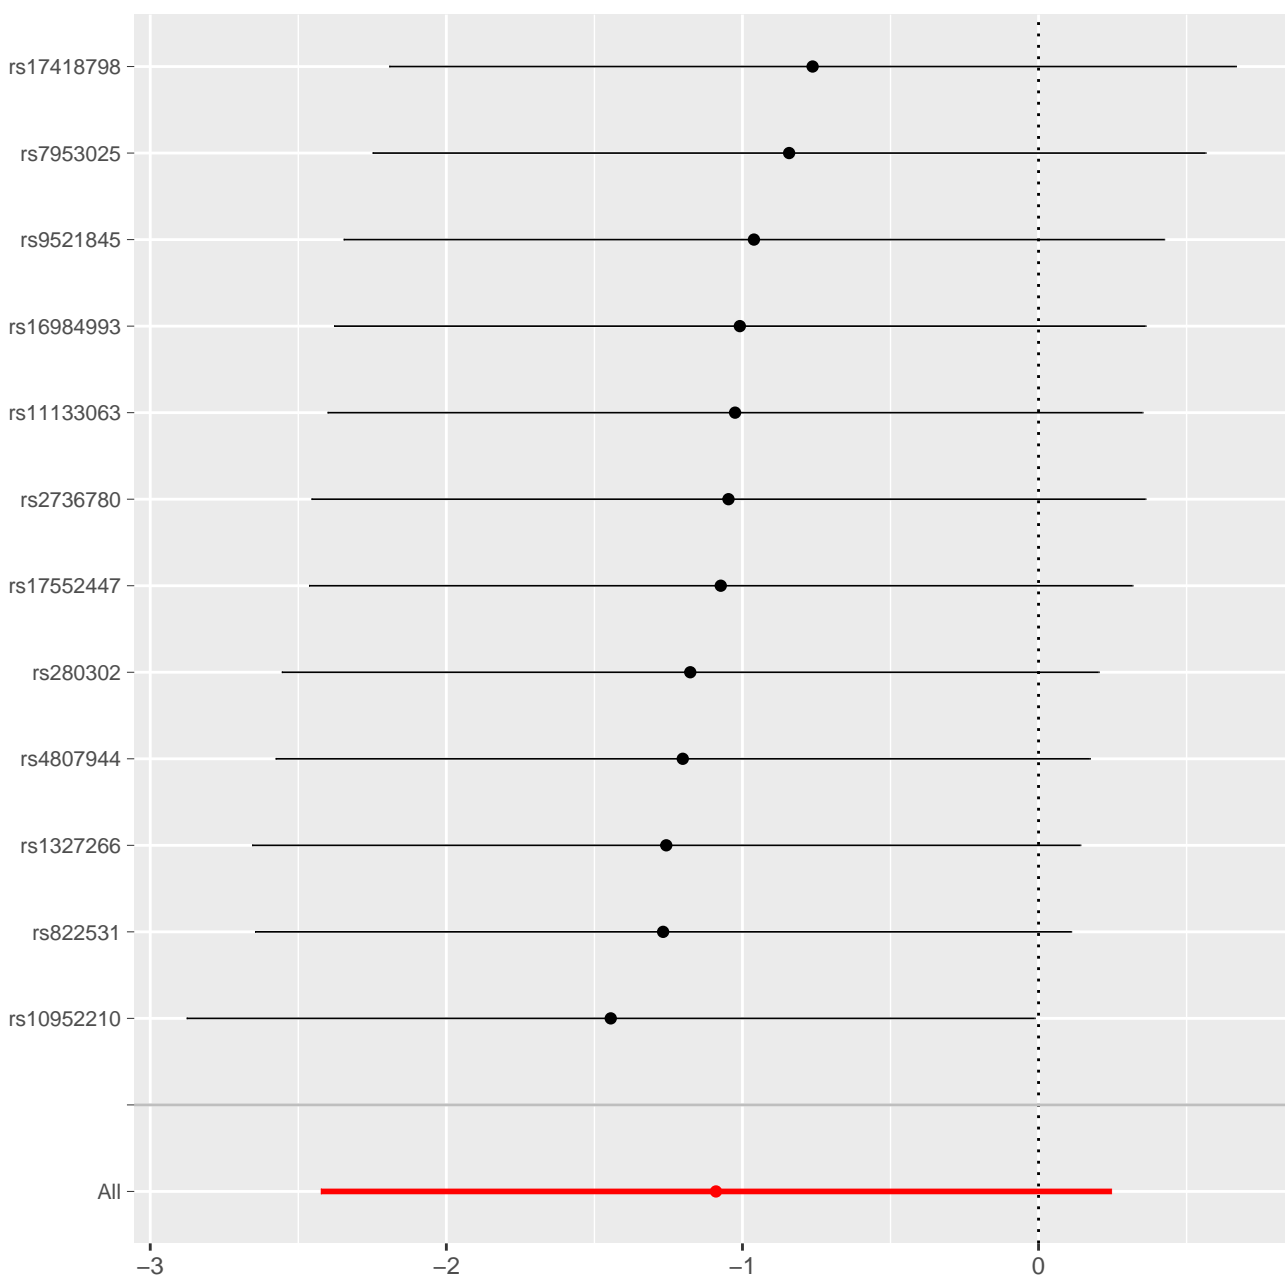

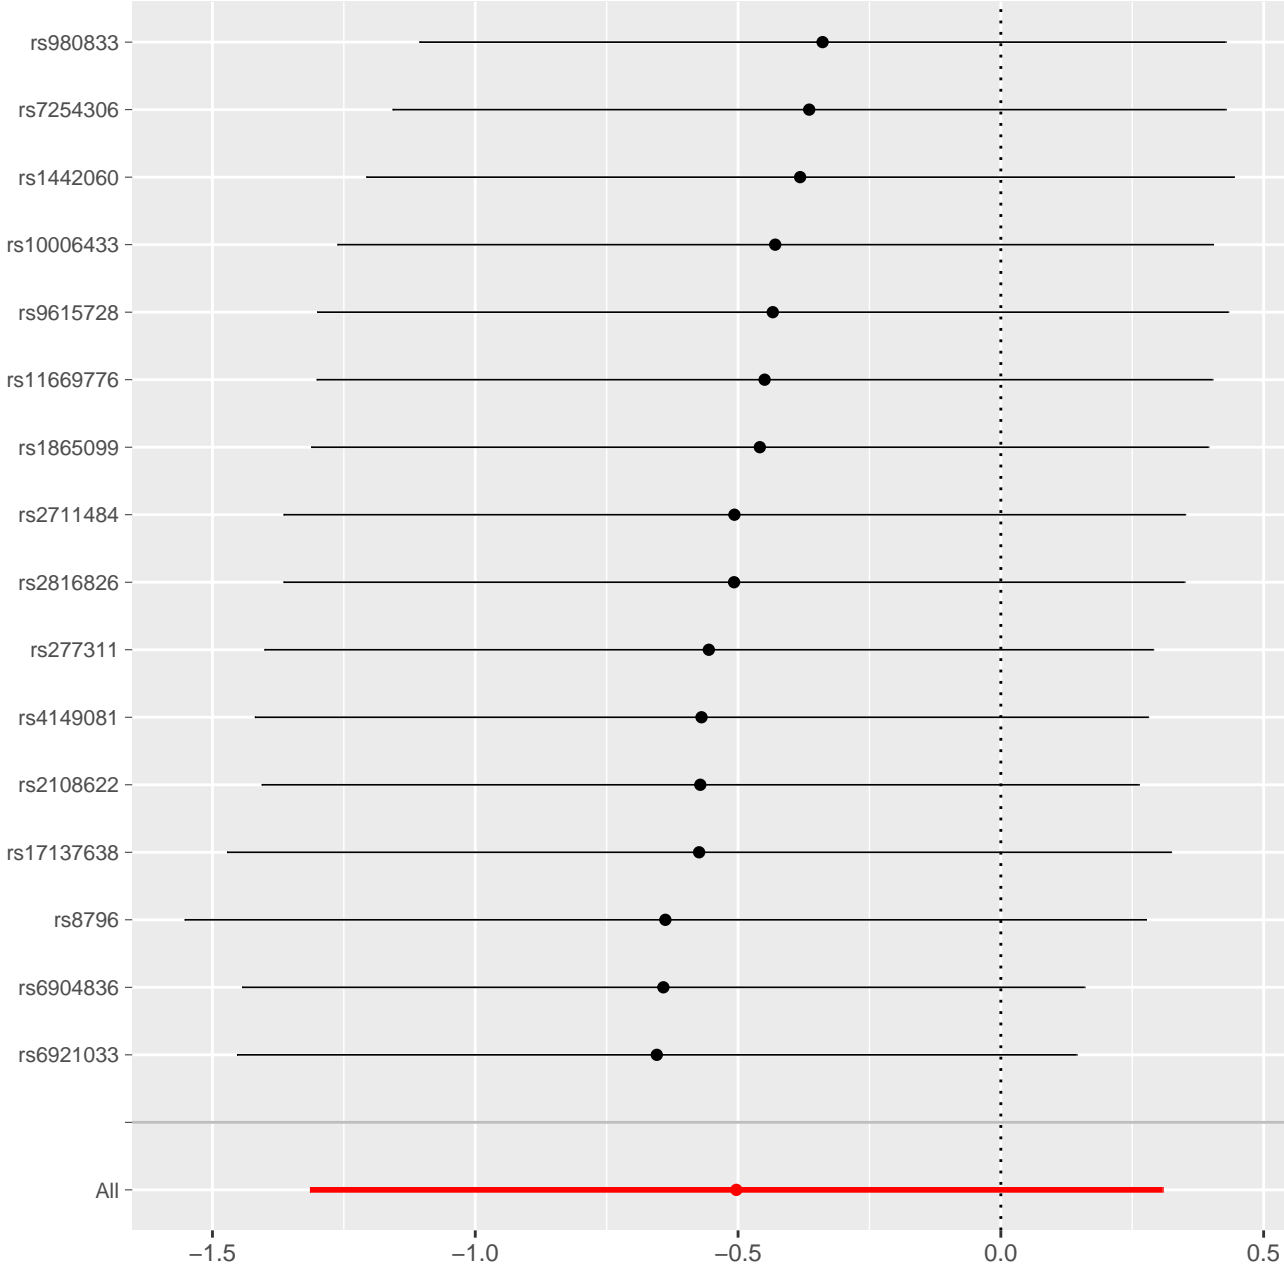



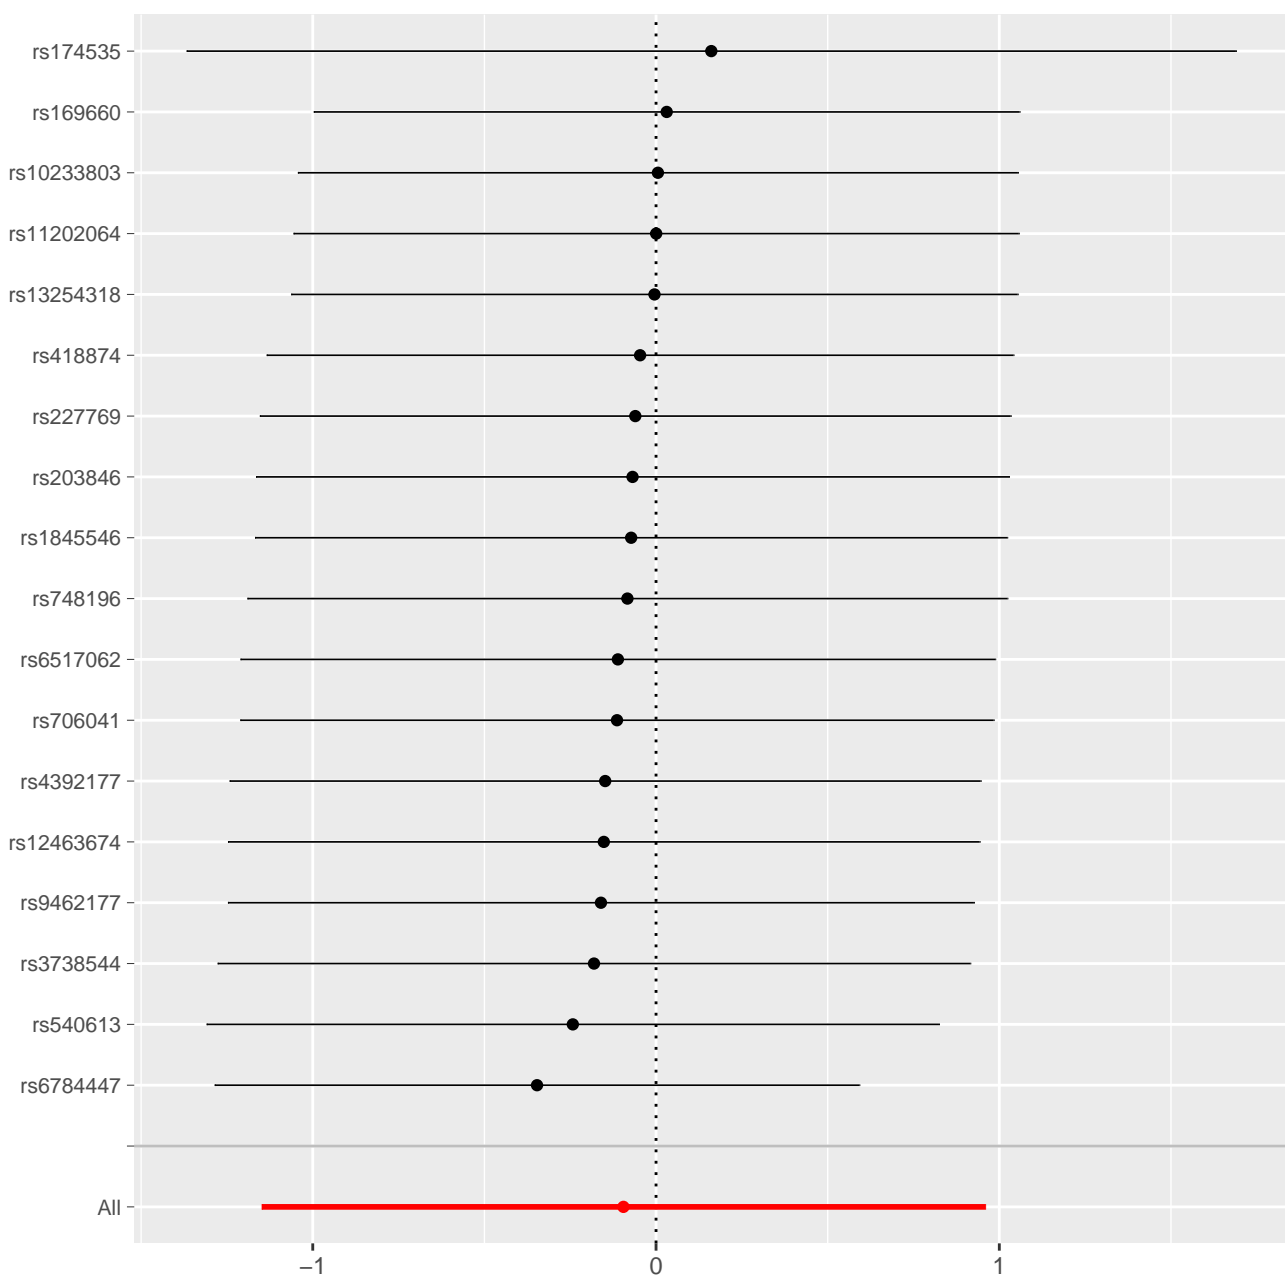

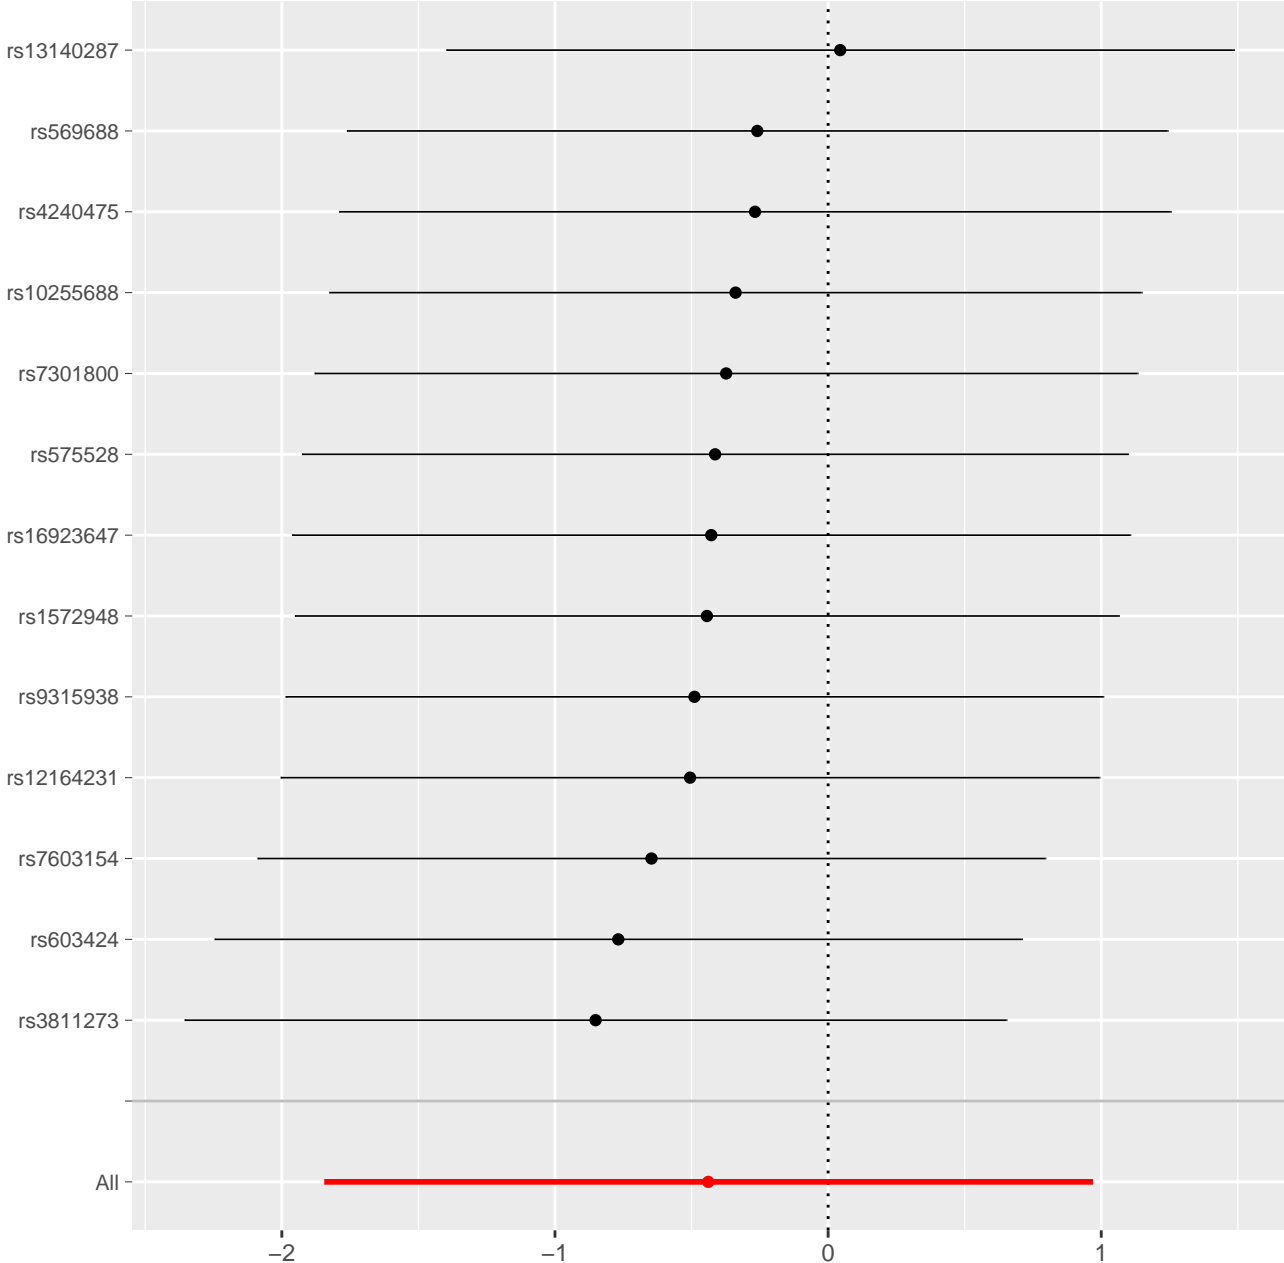

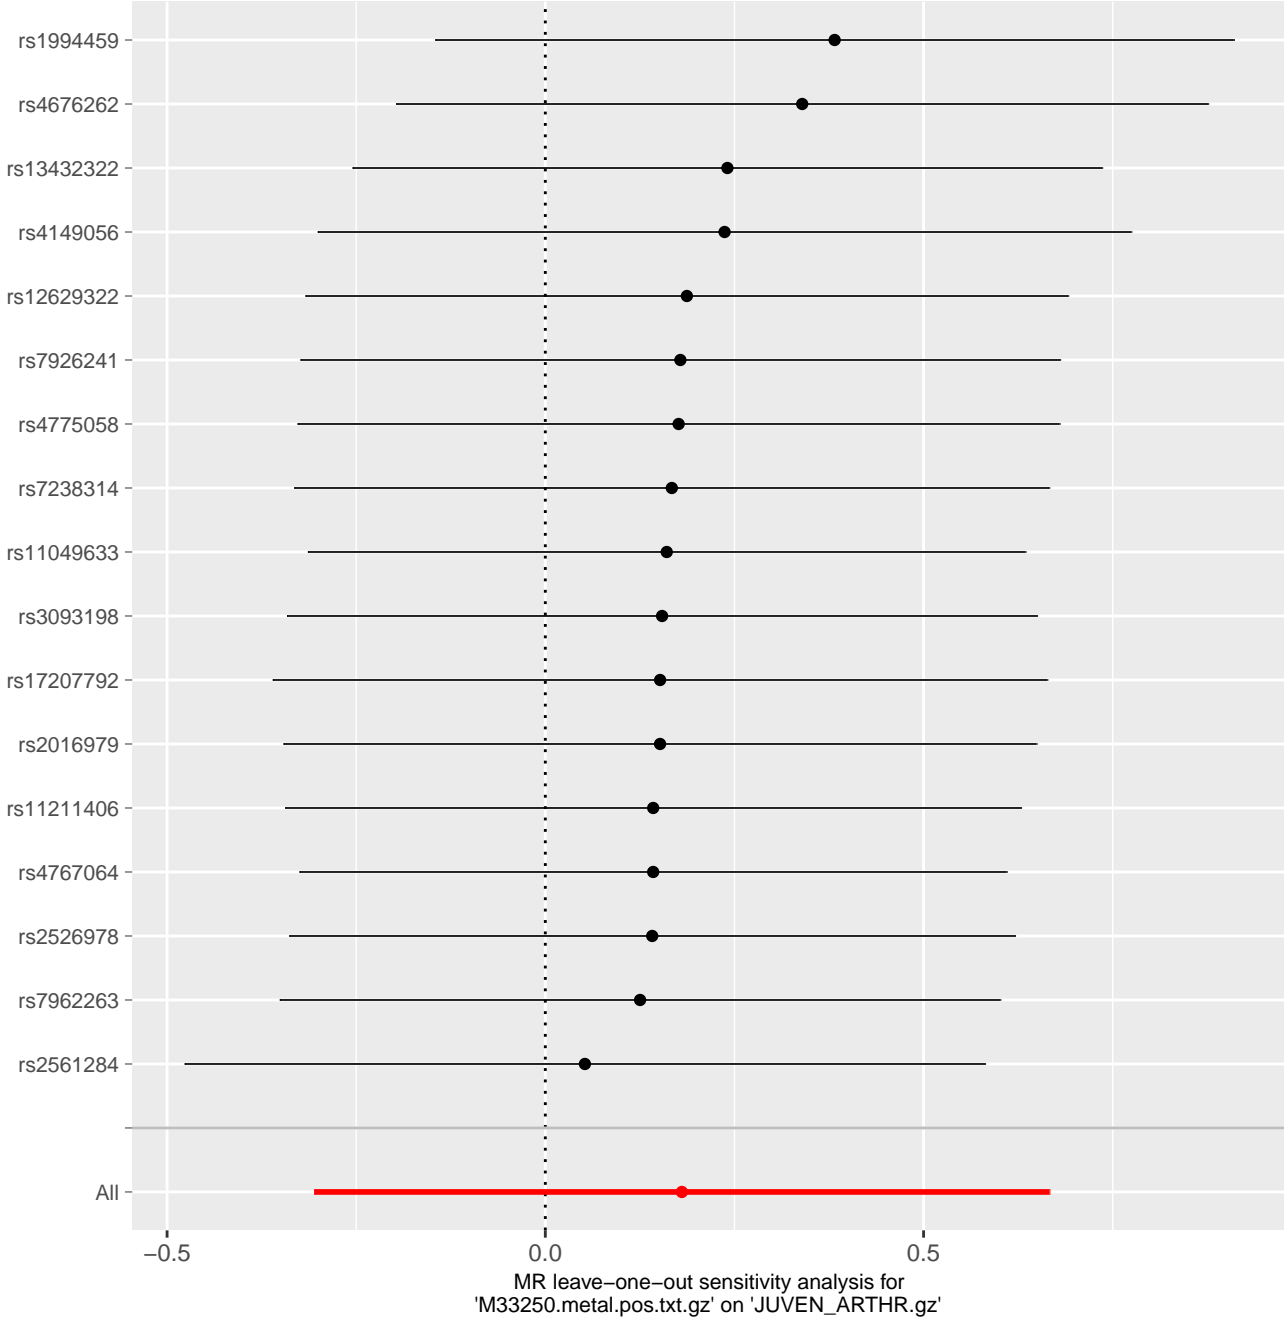

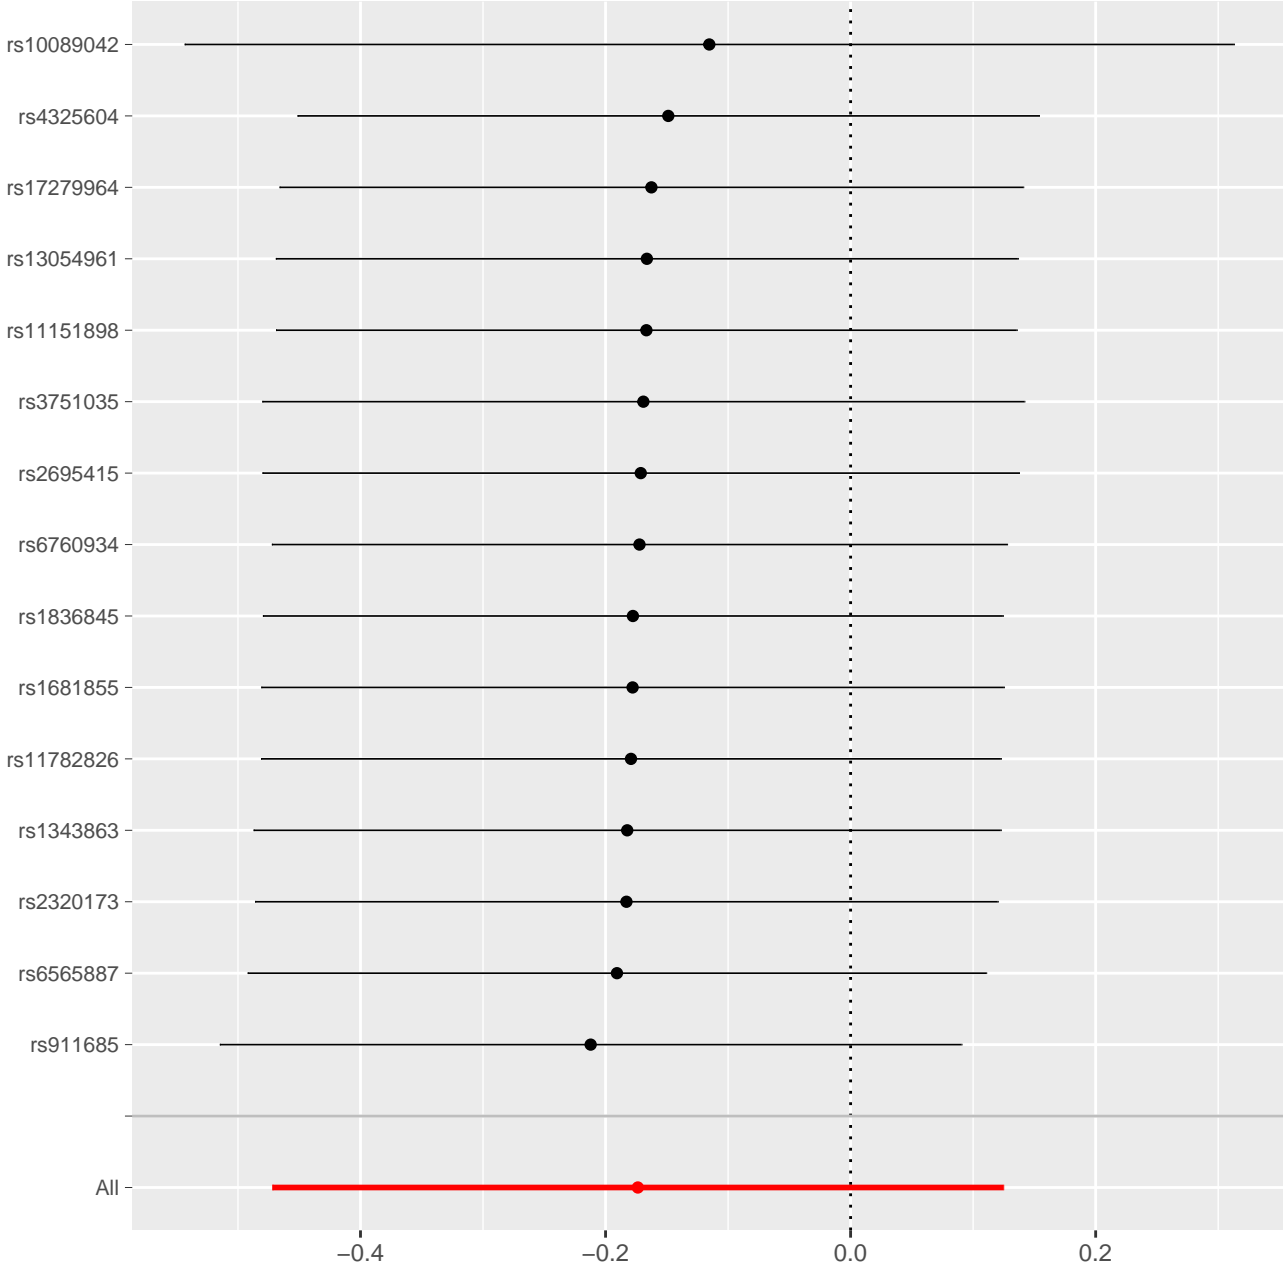

MR leave-one-out sensitivity analysis for 'M33353.metal.pos.txt.gz' on 'JUVEN\_ARTHR.gz'

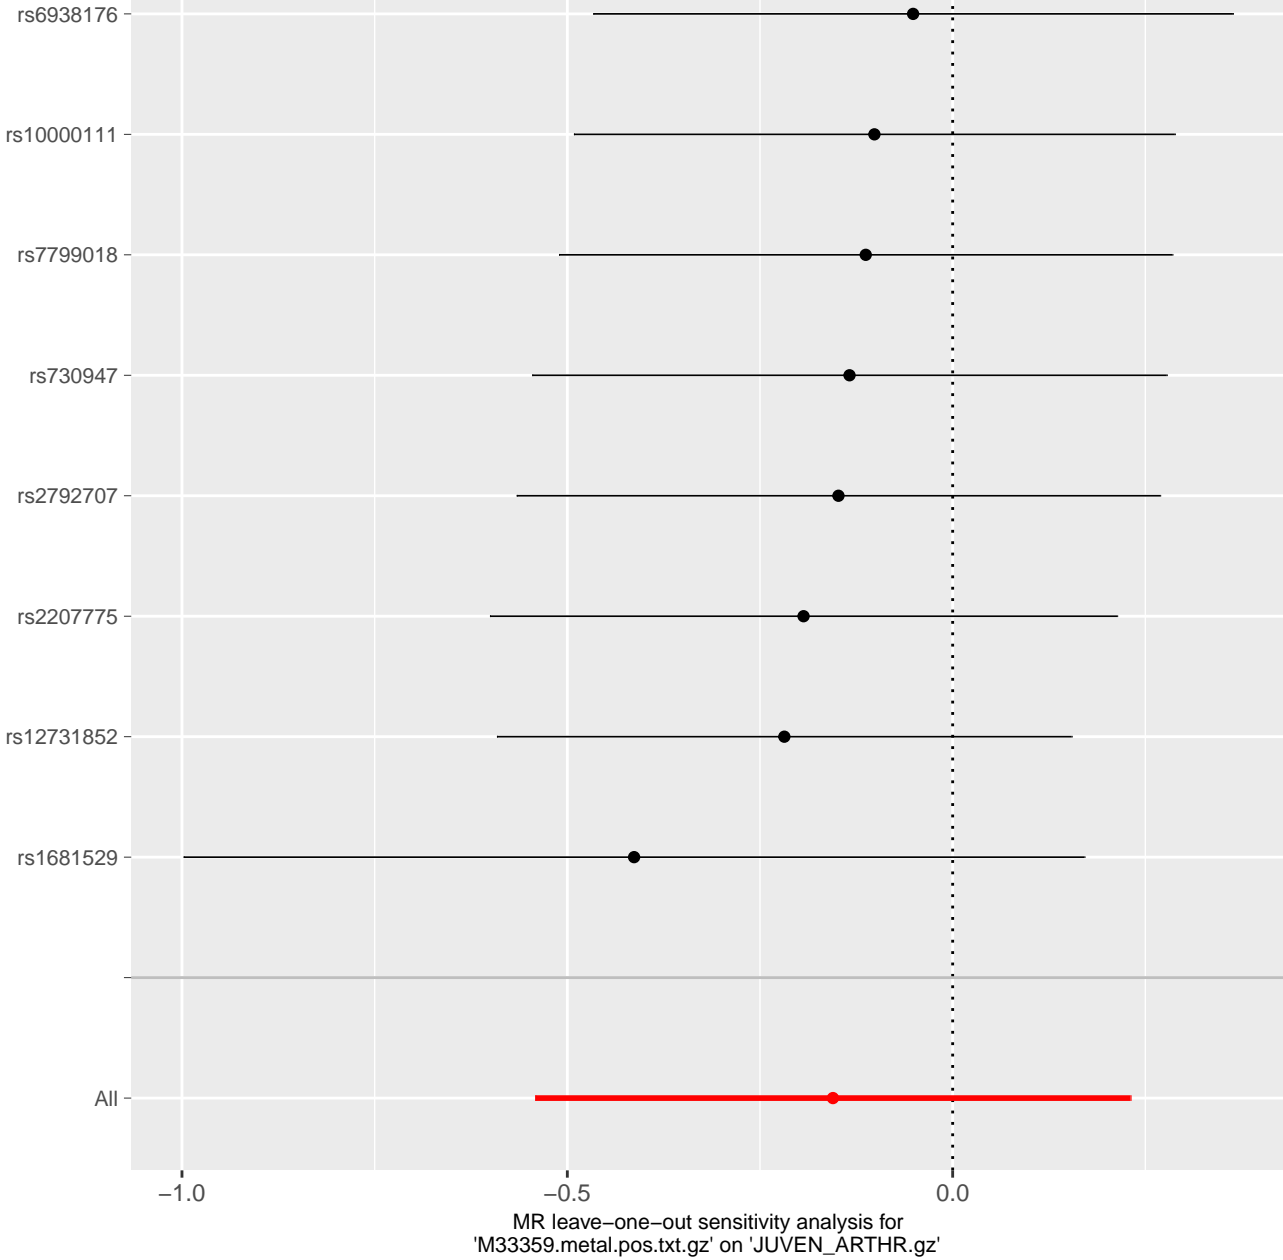

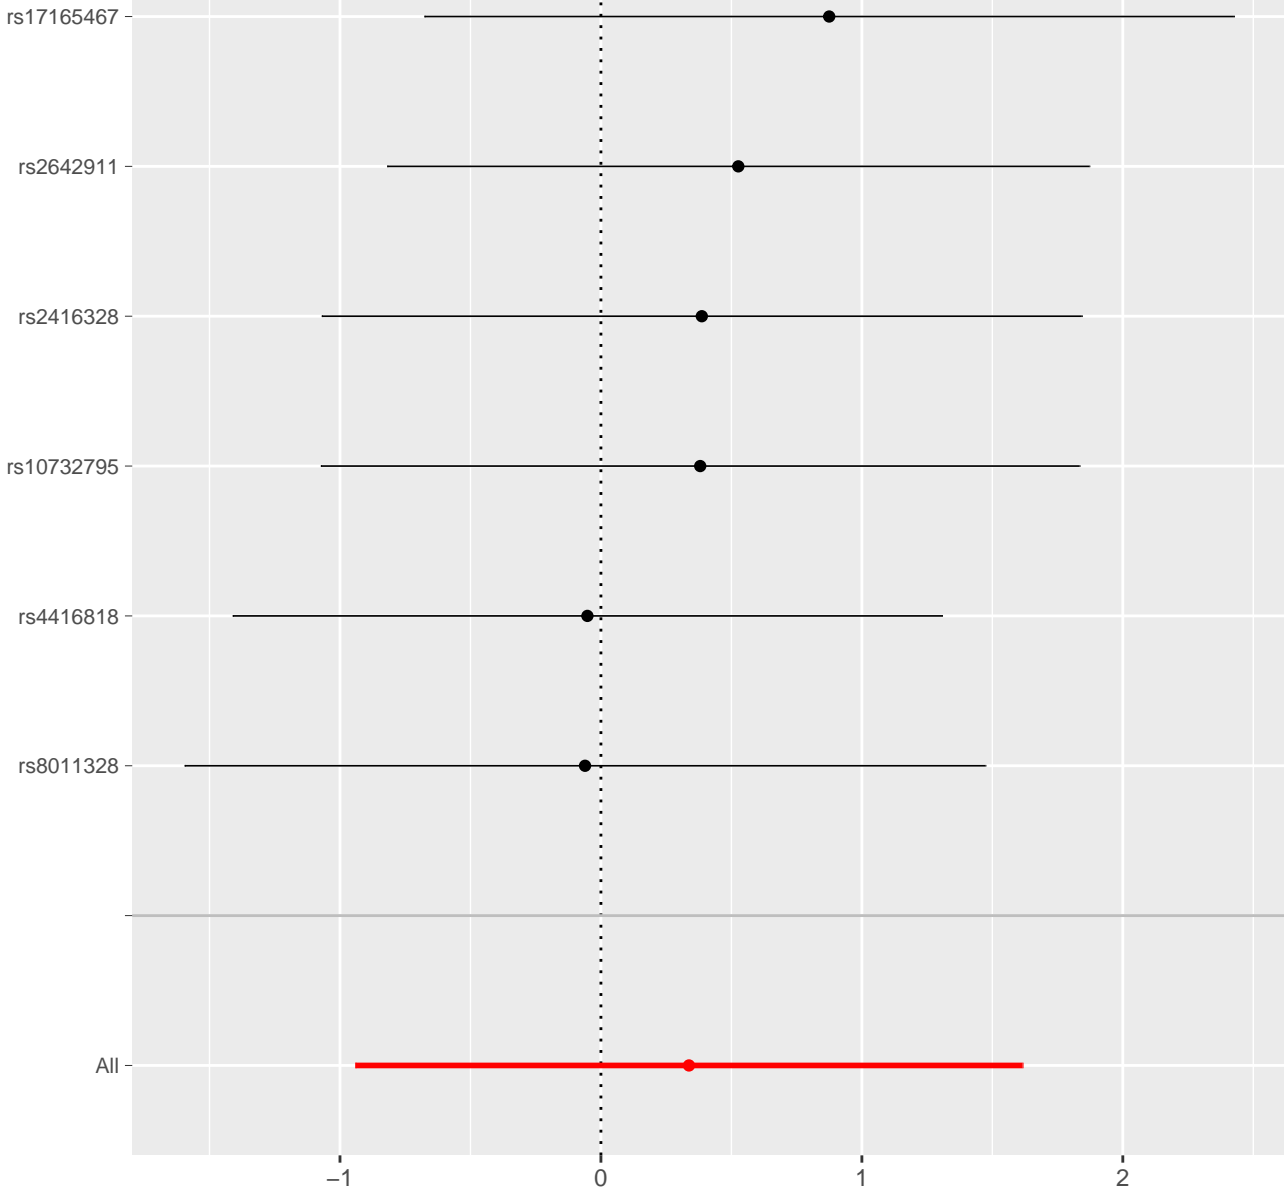

MR leave-one-out sensitivity analysis for 'M33363.metal.pos.txt.gz' on 'JUVEN\_ARTHR.gz'

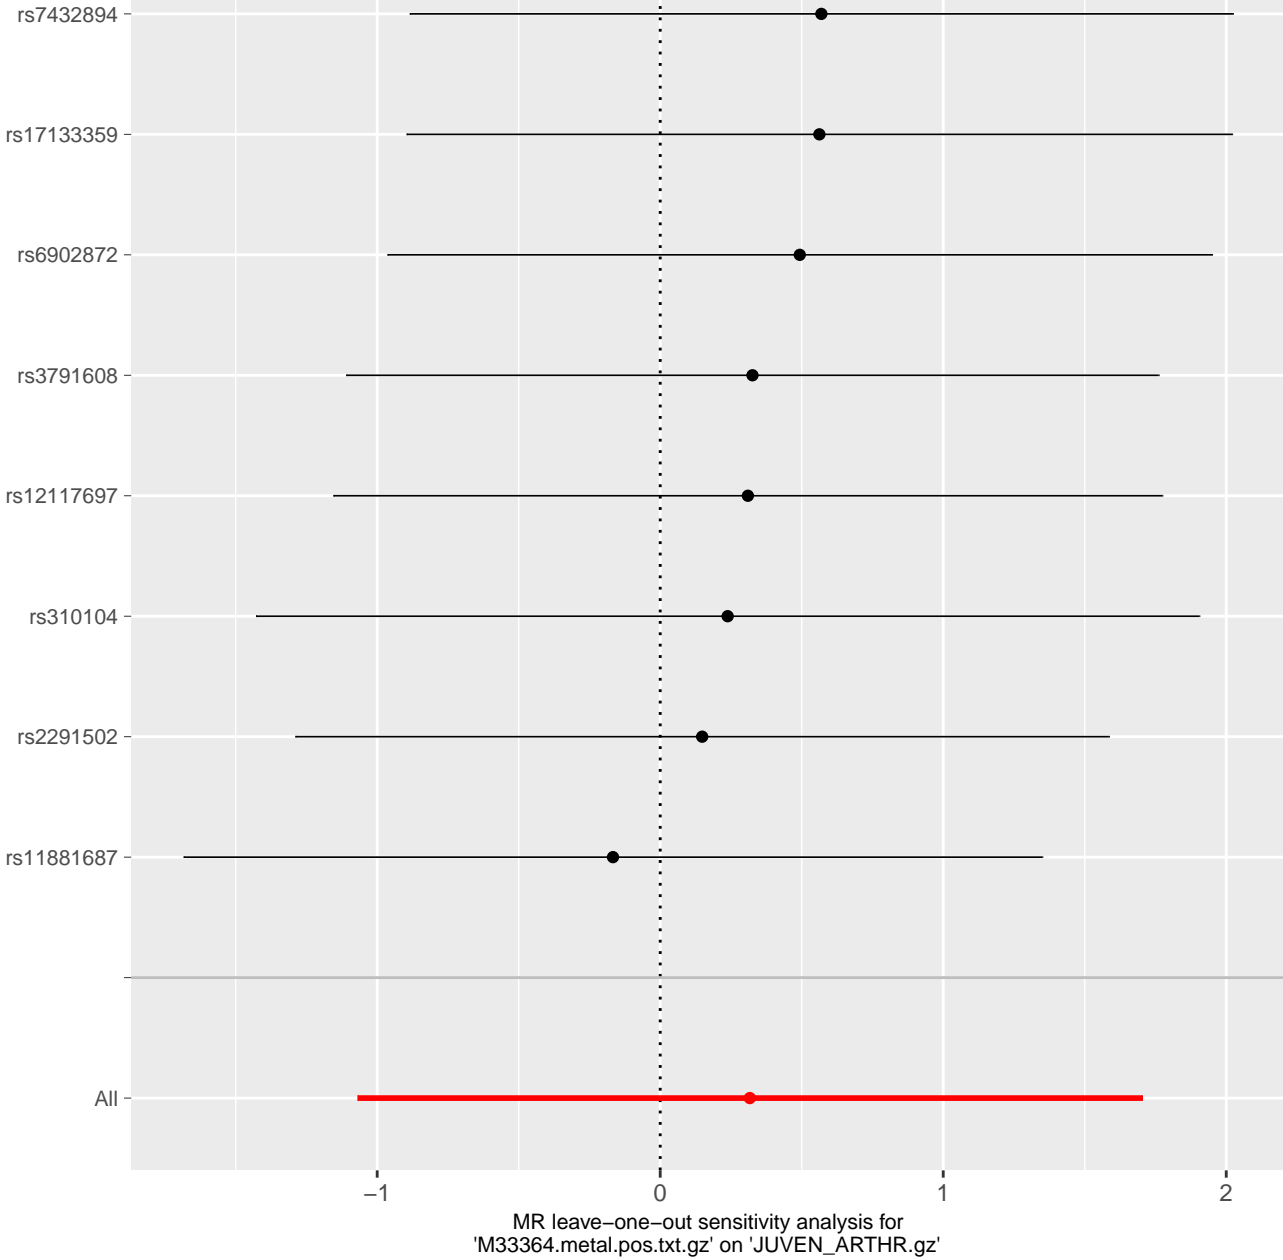

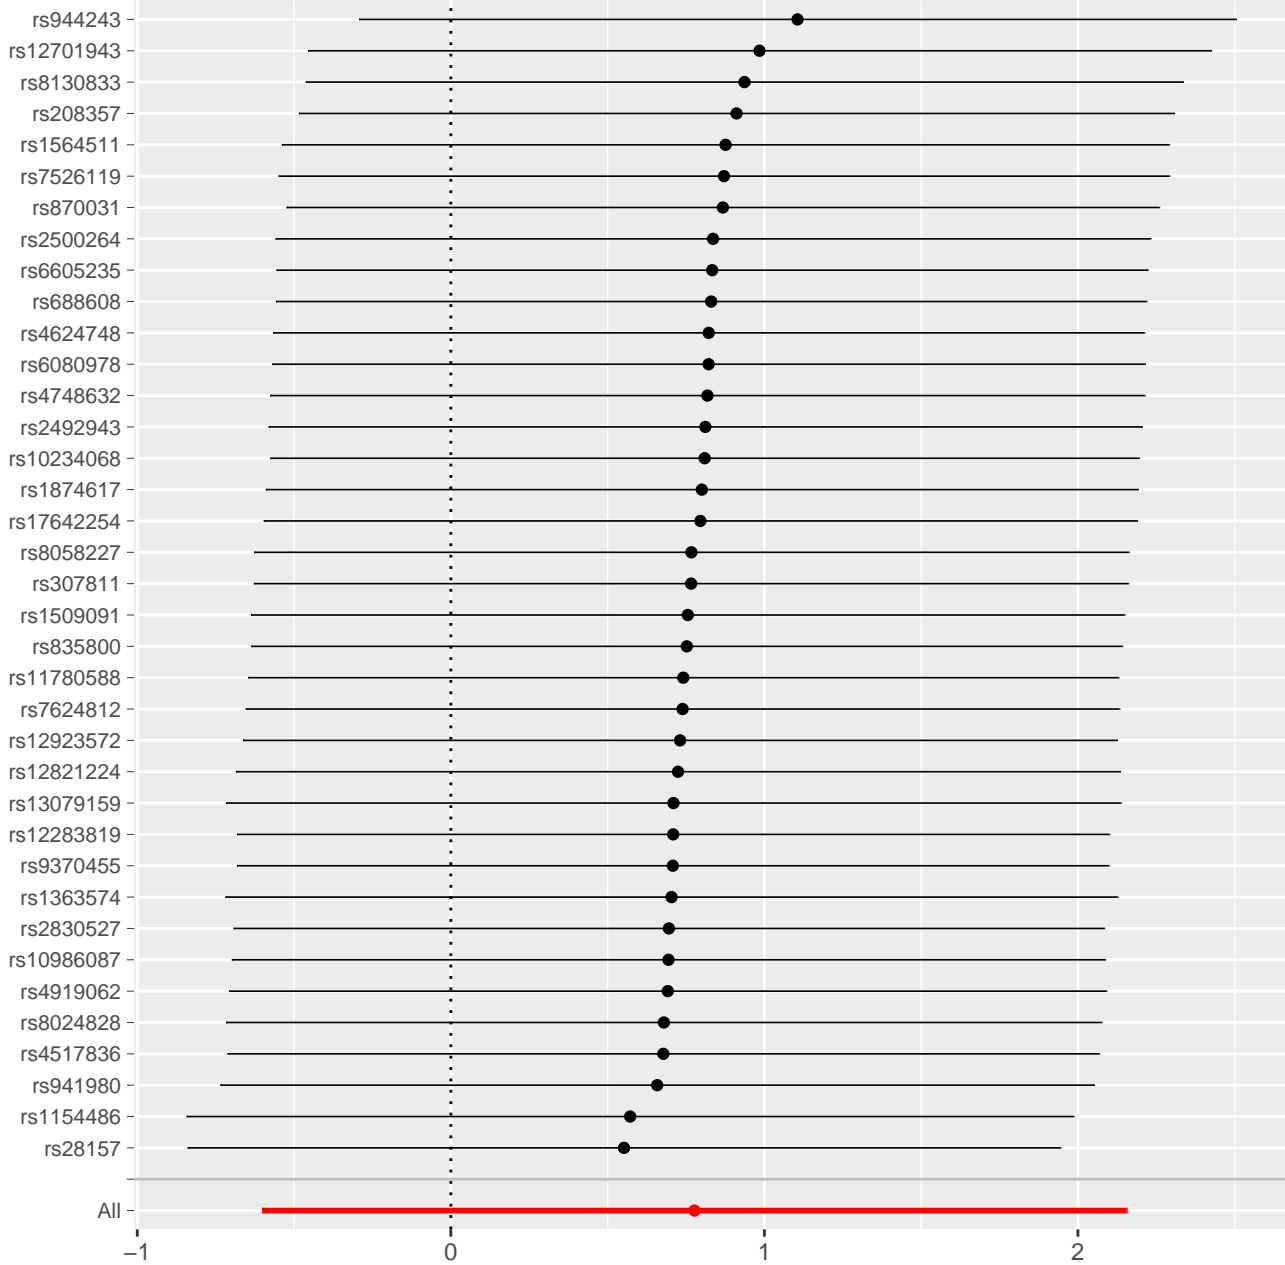

MR leave-one-out sensitivity analysis for 'M33380.metal.pos.txt.gz' on 'JUVEN\_ARTHR.gz'



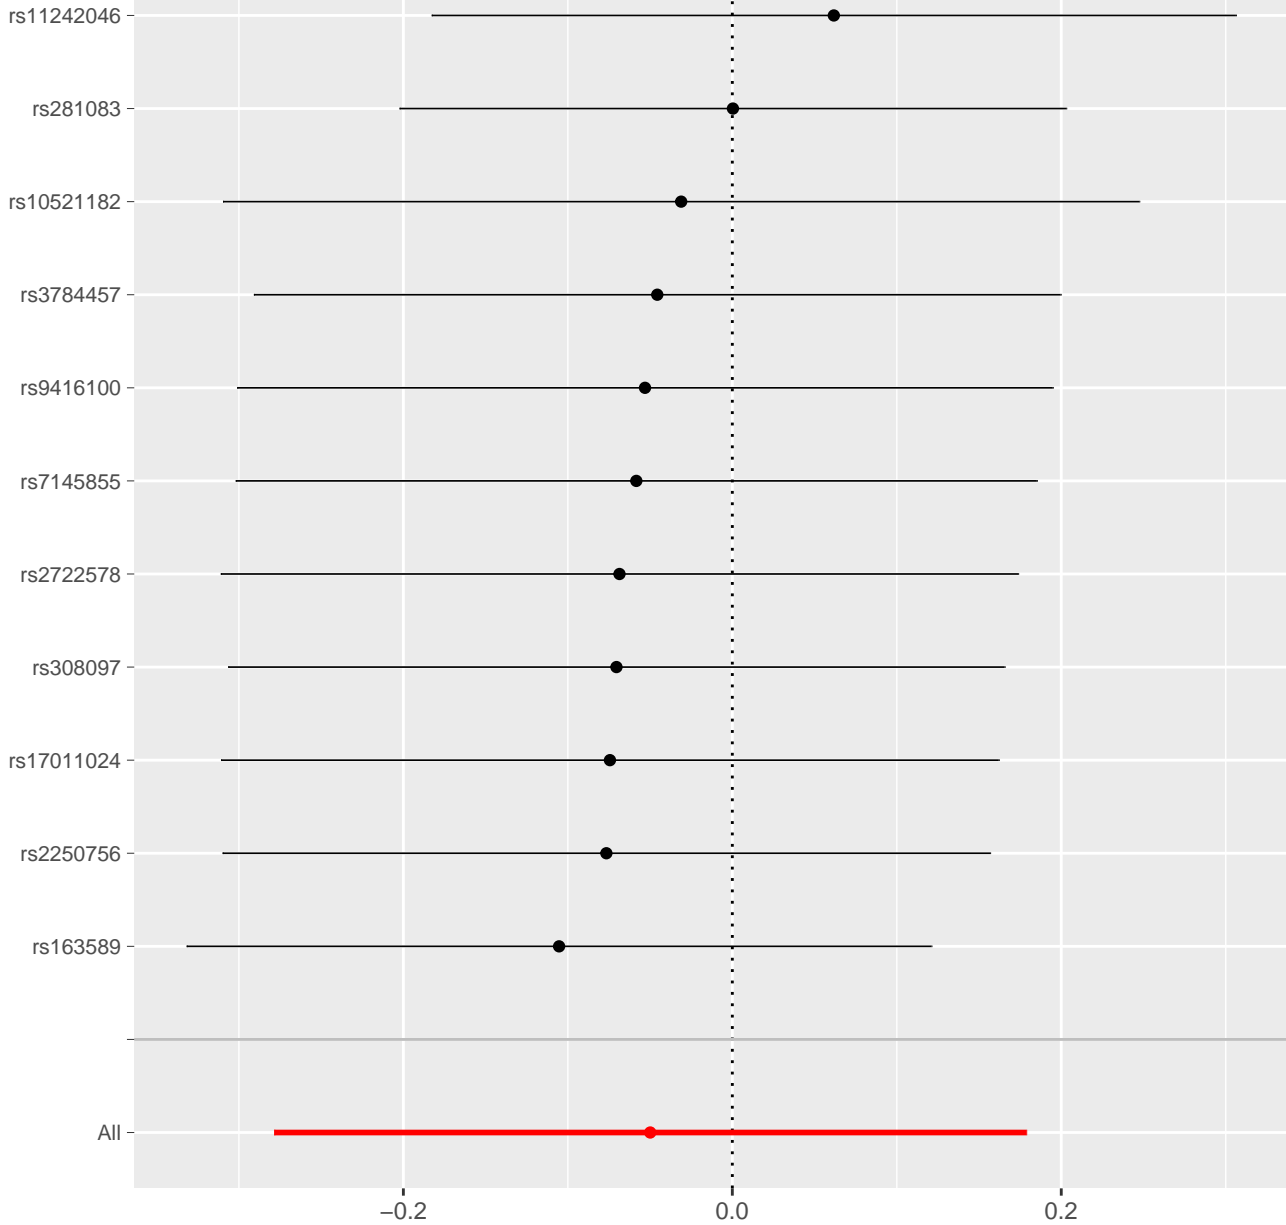

MR leave-one-out sensitivity analysis for 'M33384.metal.pos.txt.gz' on 'JUVEN\_ARTHR.gz'

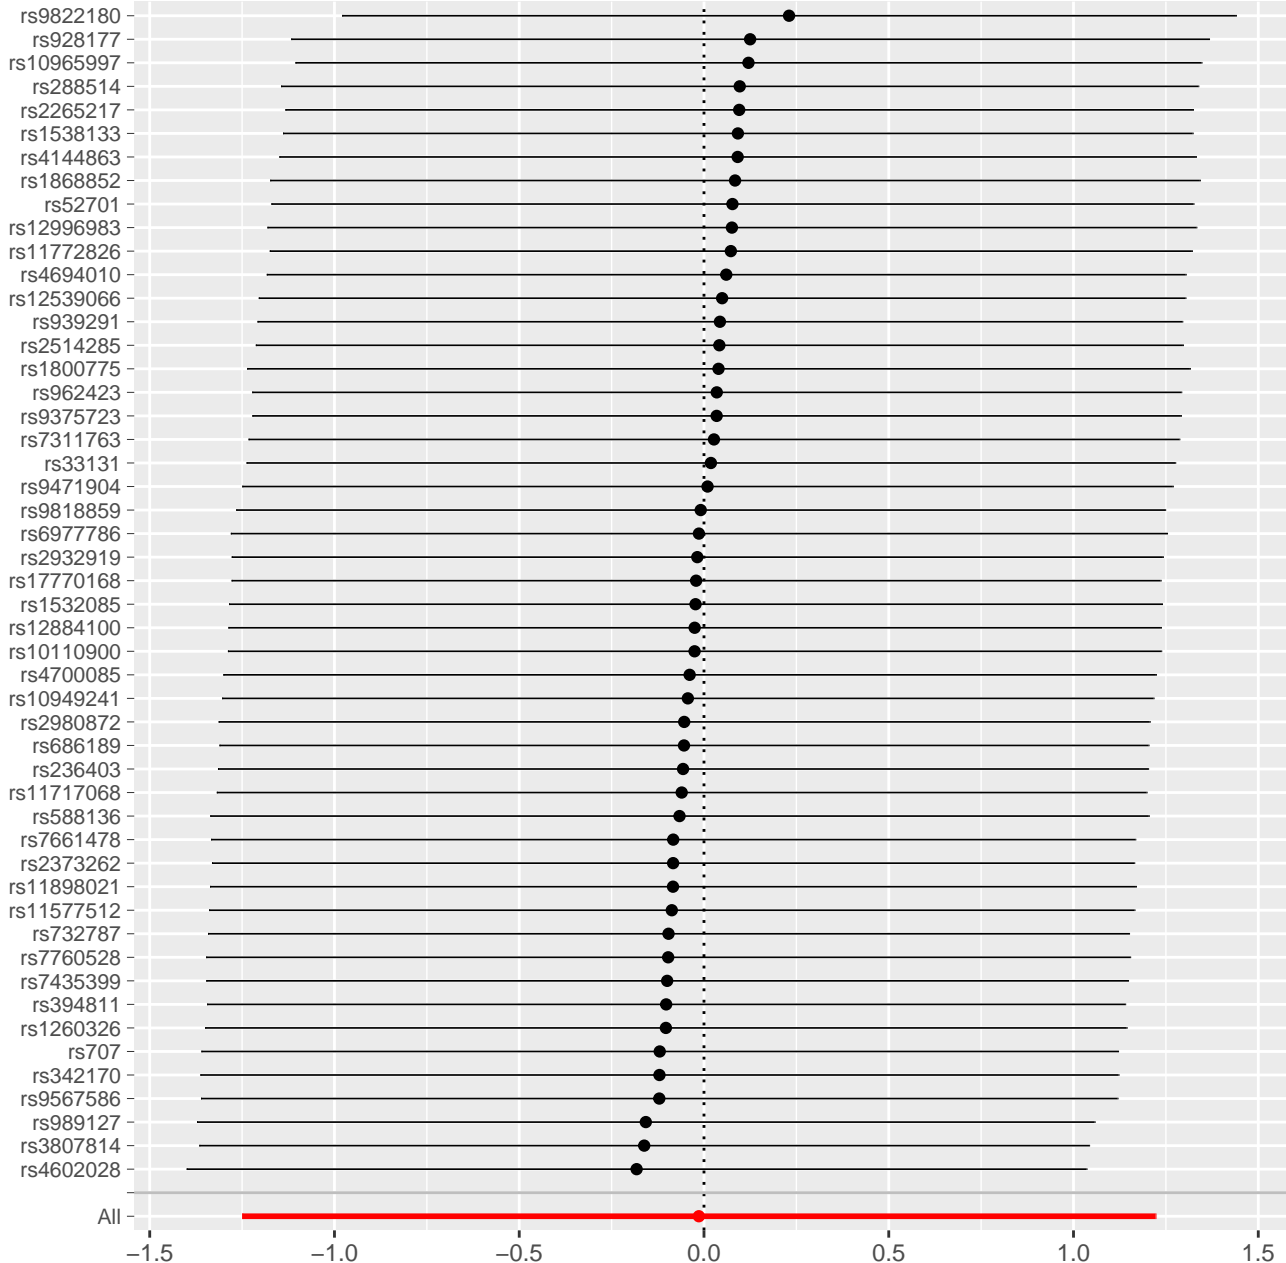

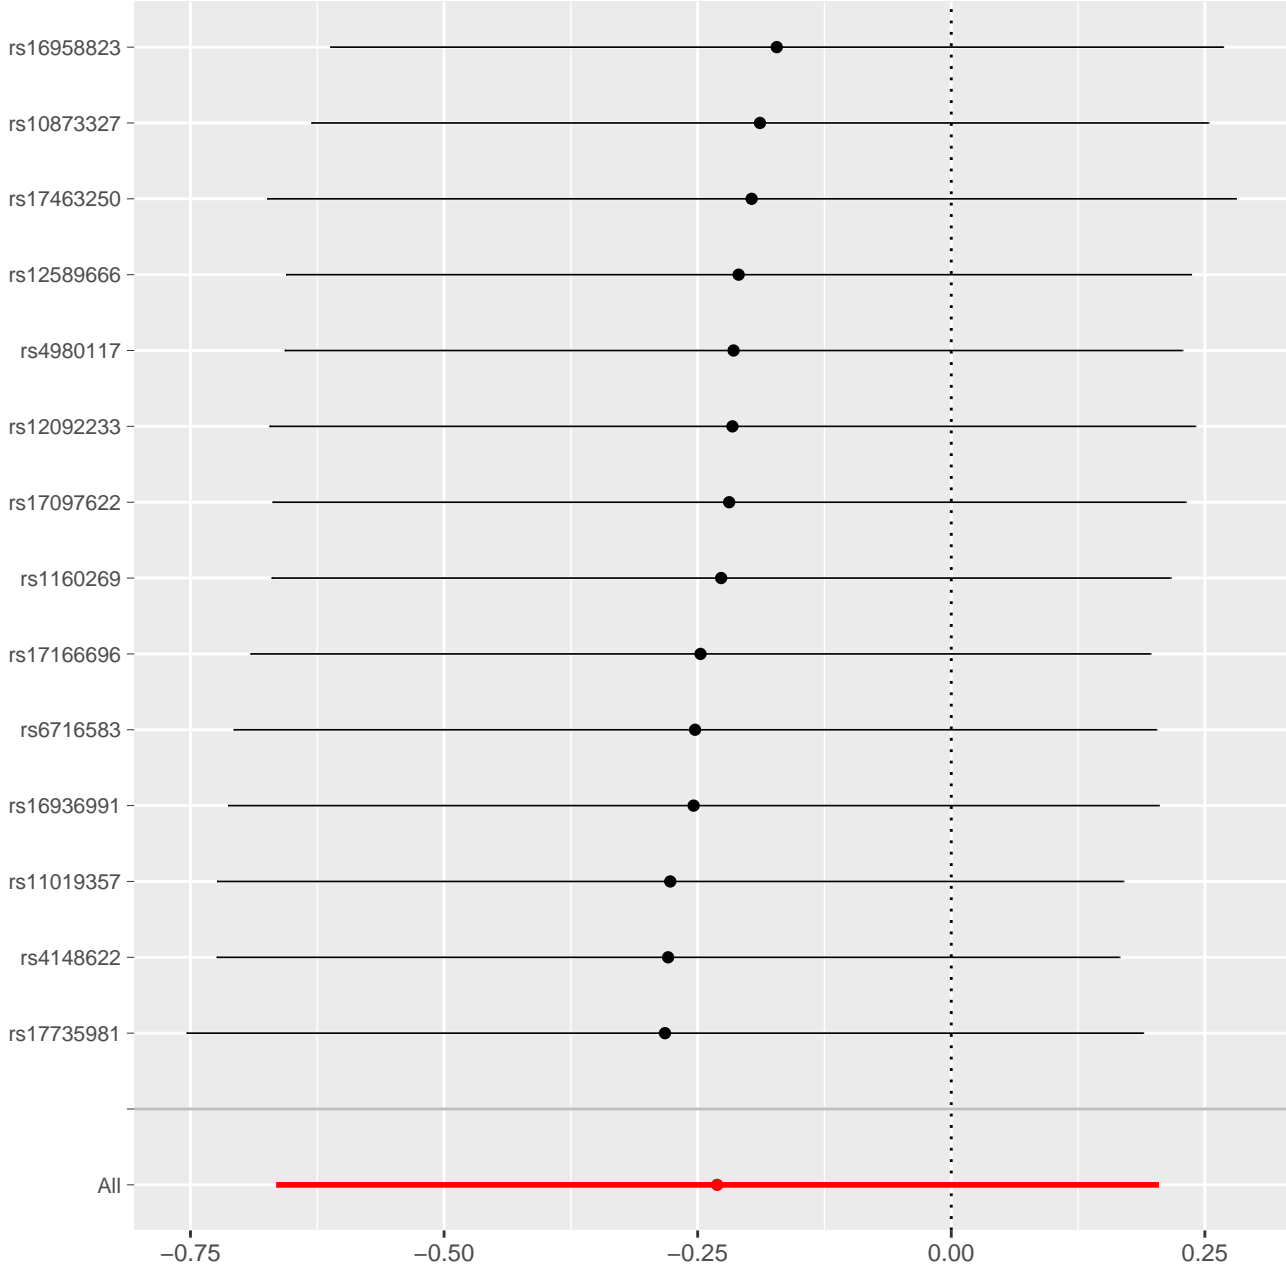

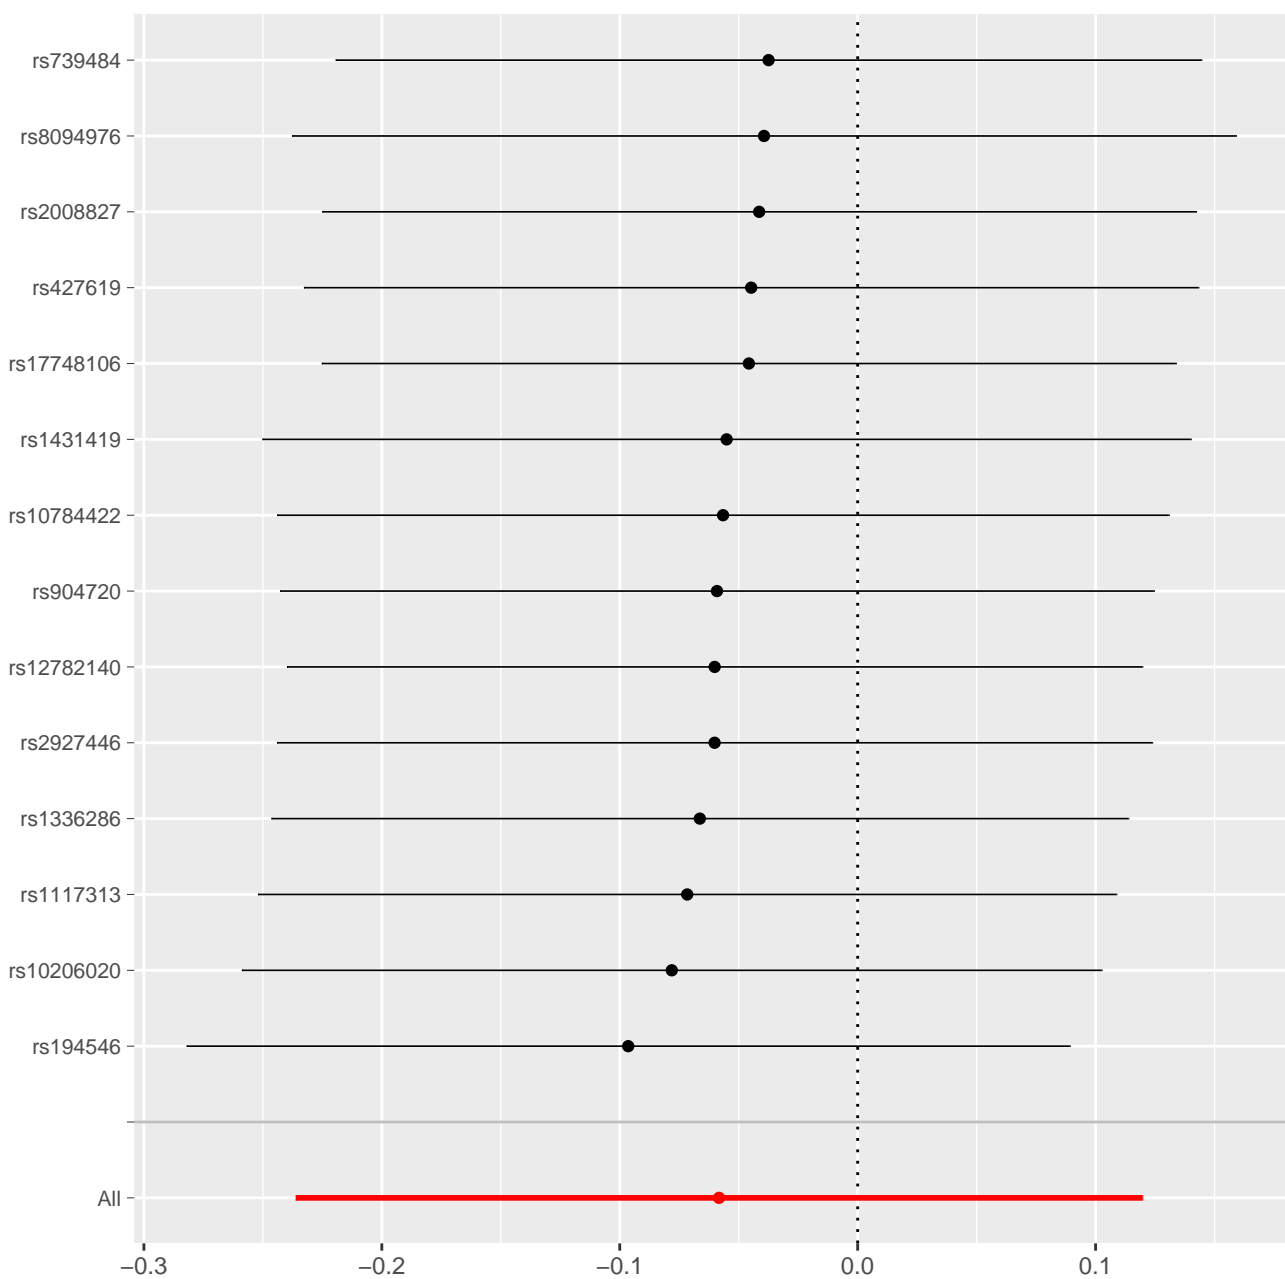

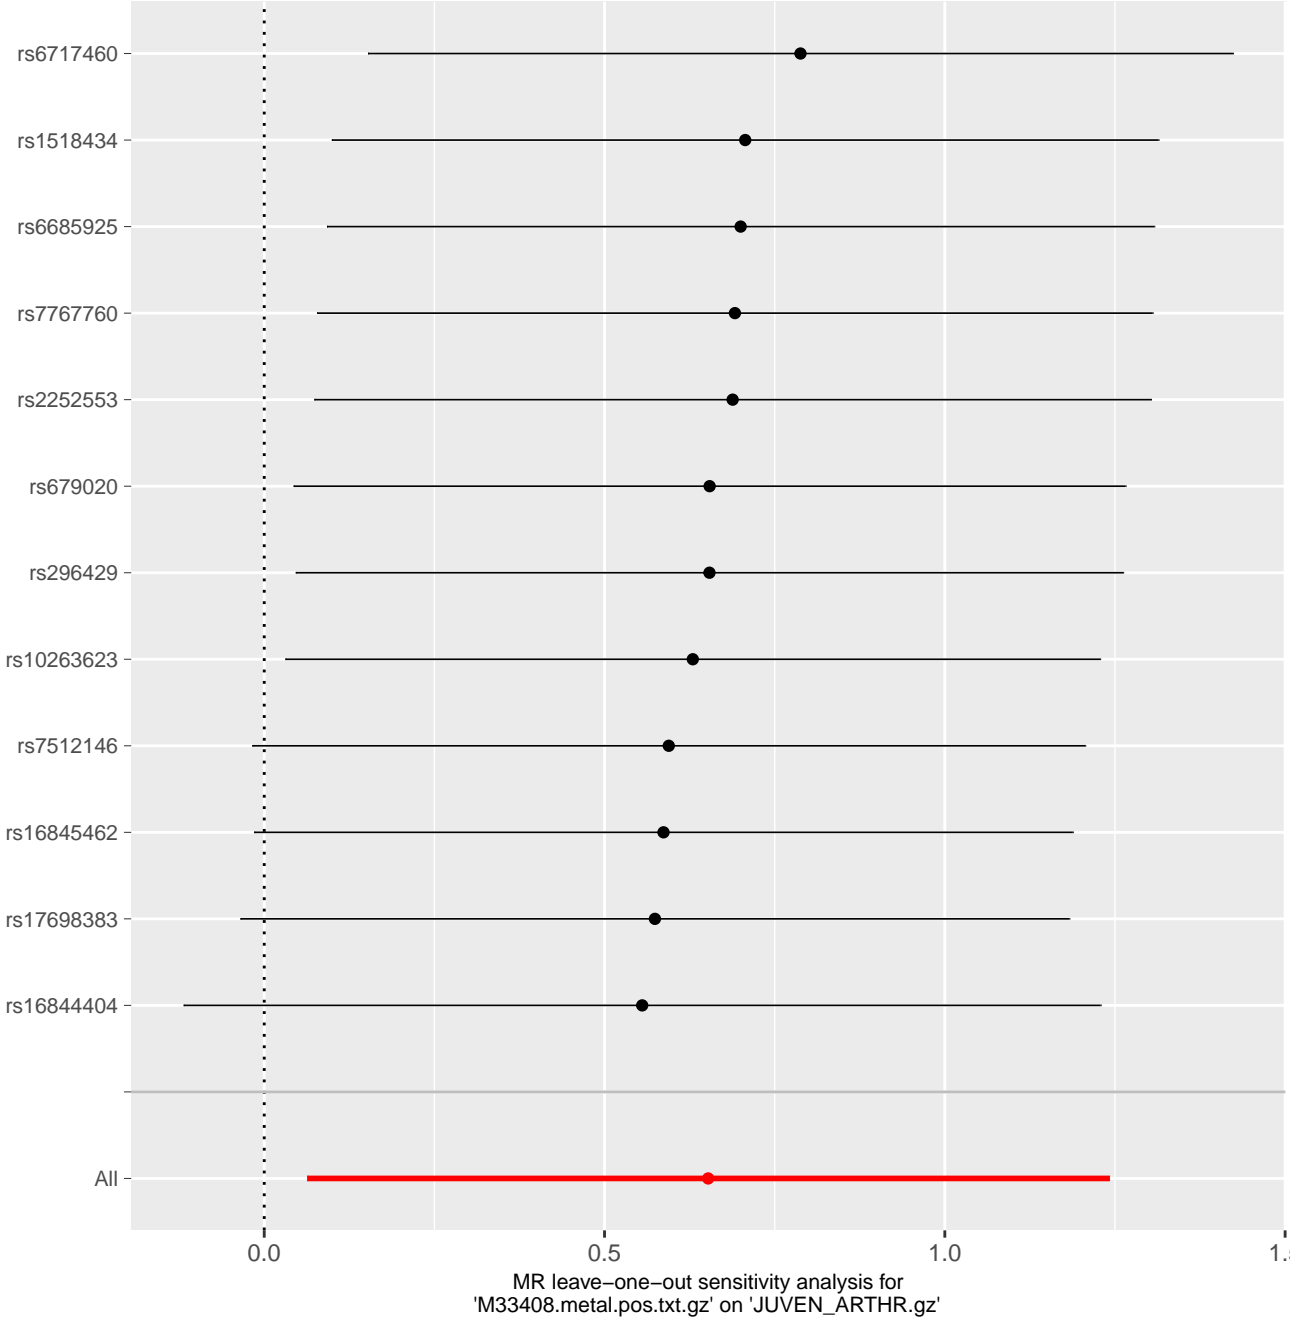

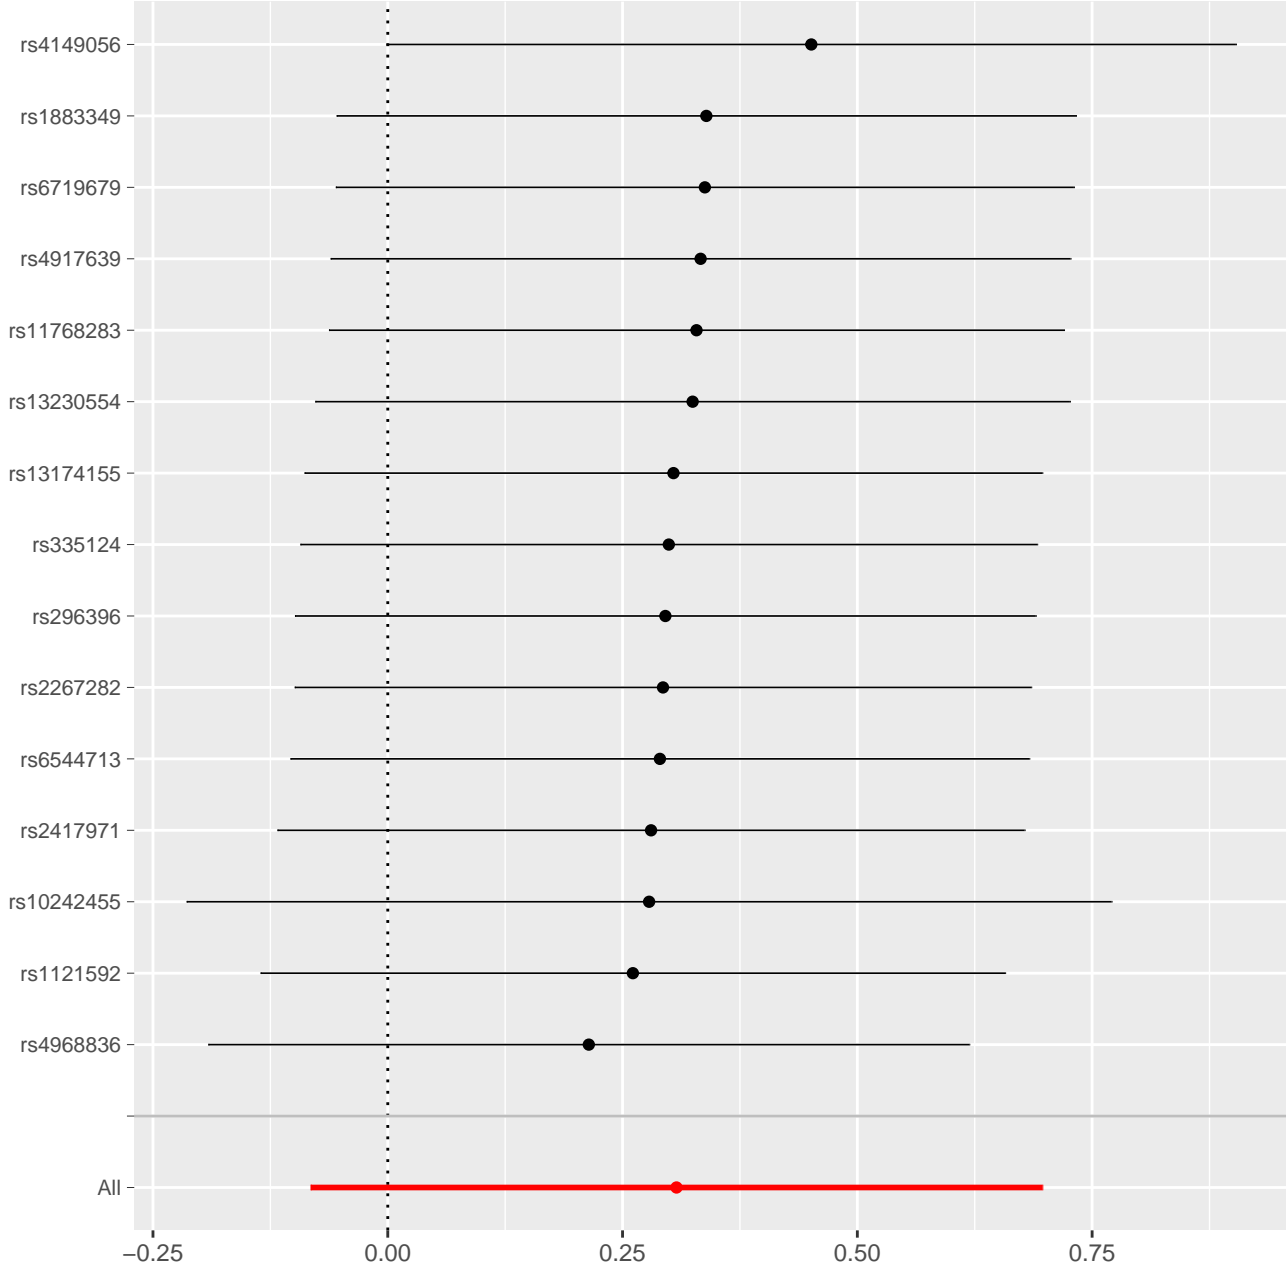

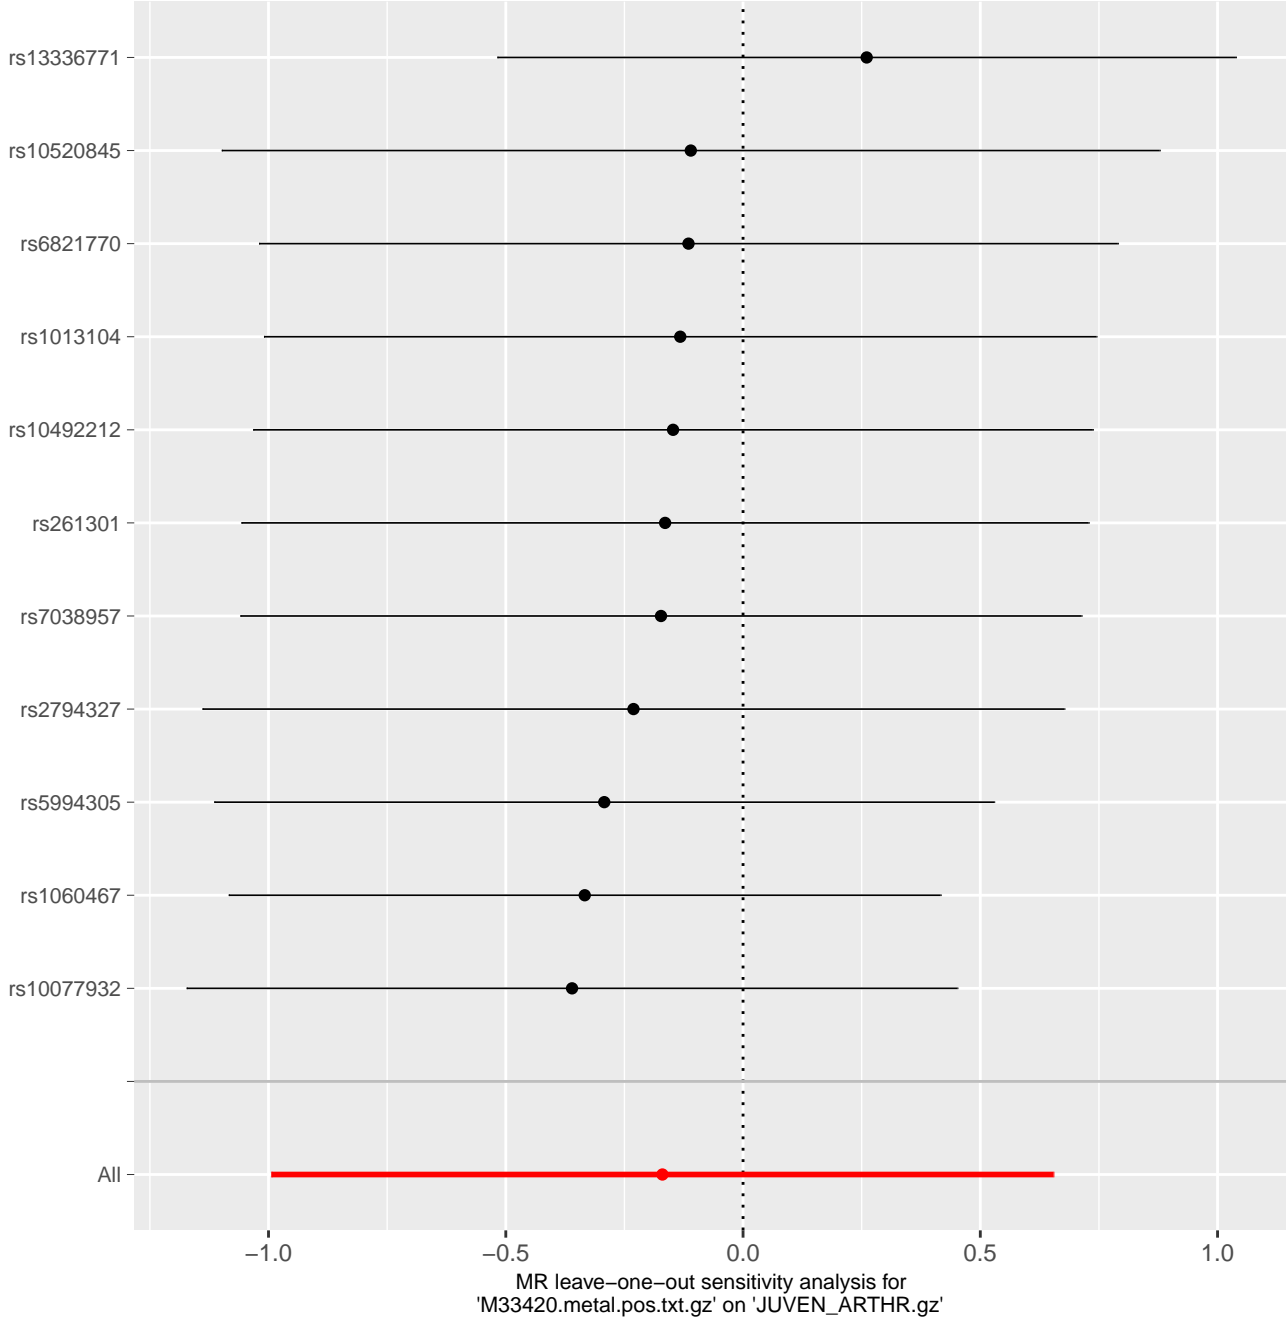

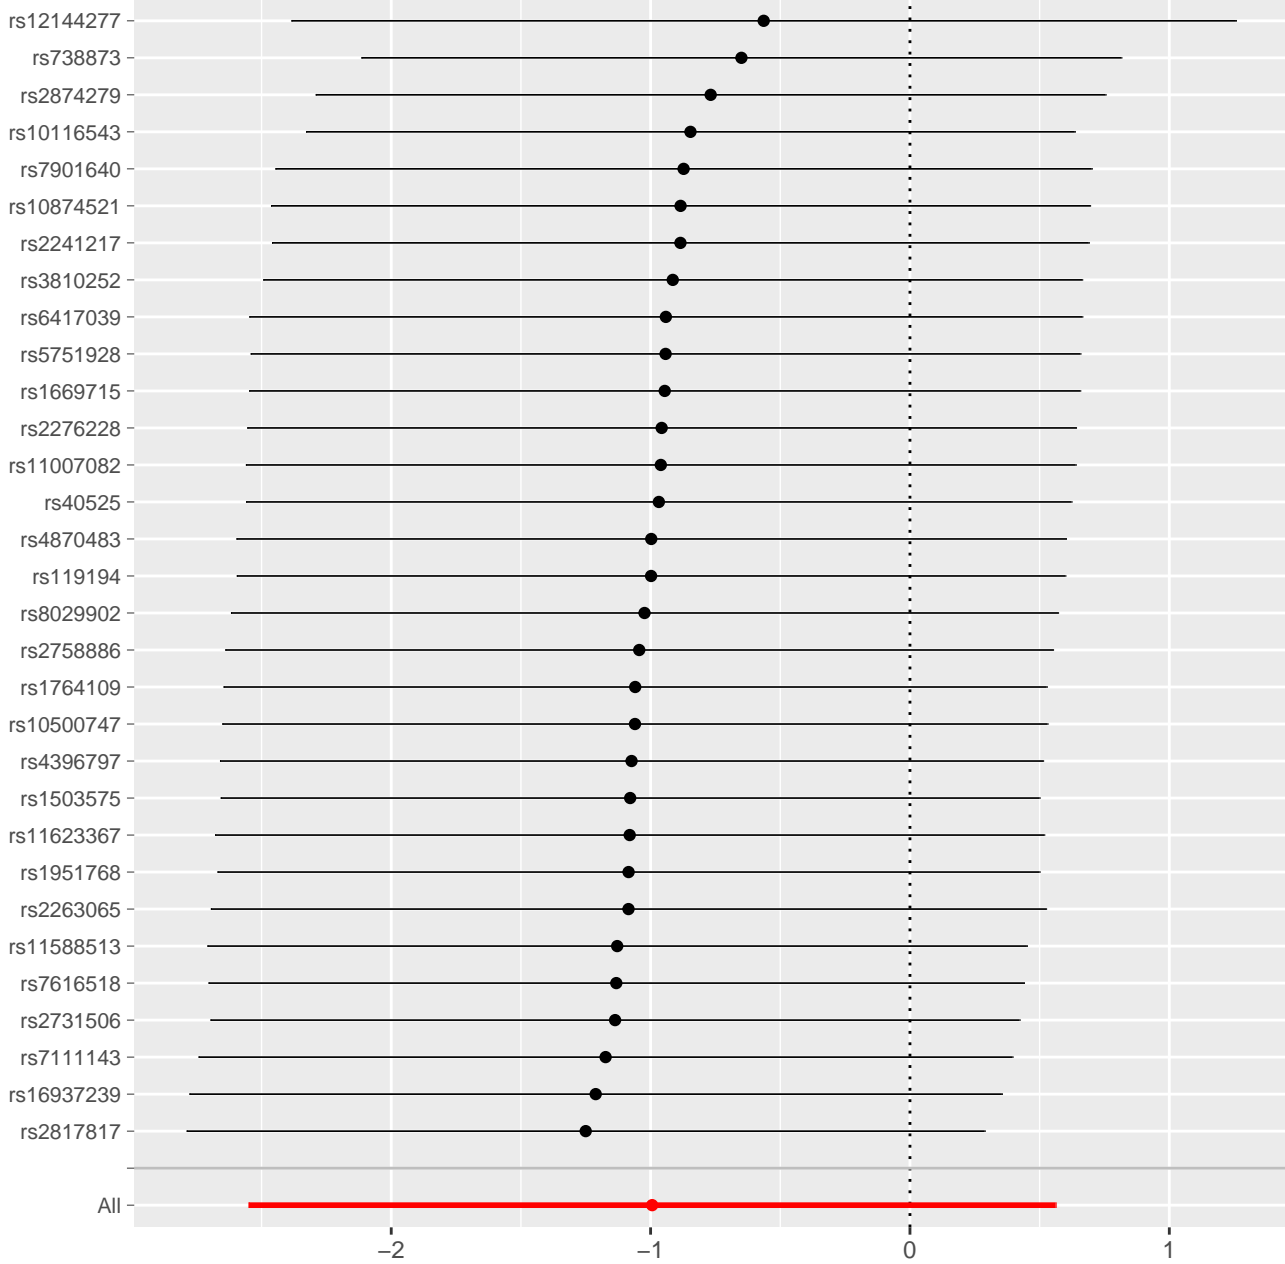

MR leave-one-out sensitivity analysis for 'M33422.metal.pos.txt.gz' on 'JUVEN\_ARTHR.gz'



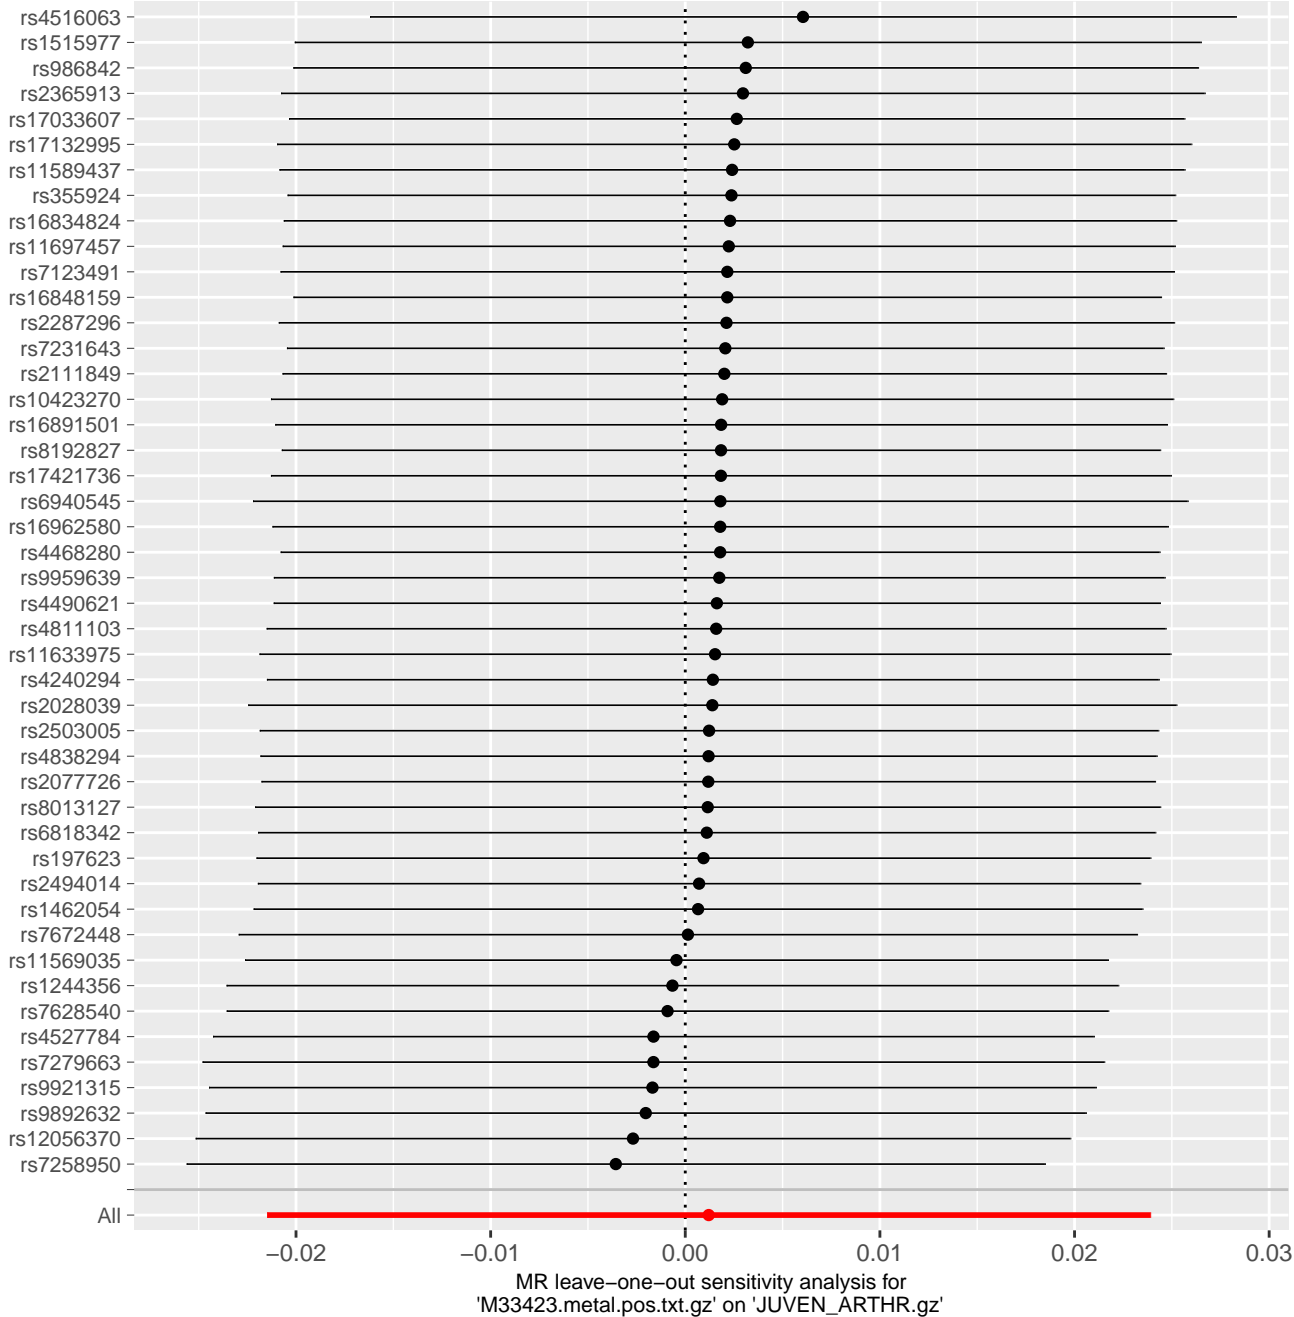

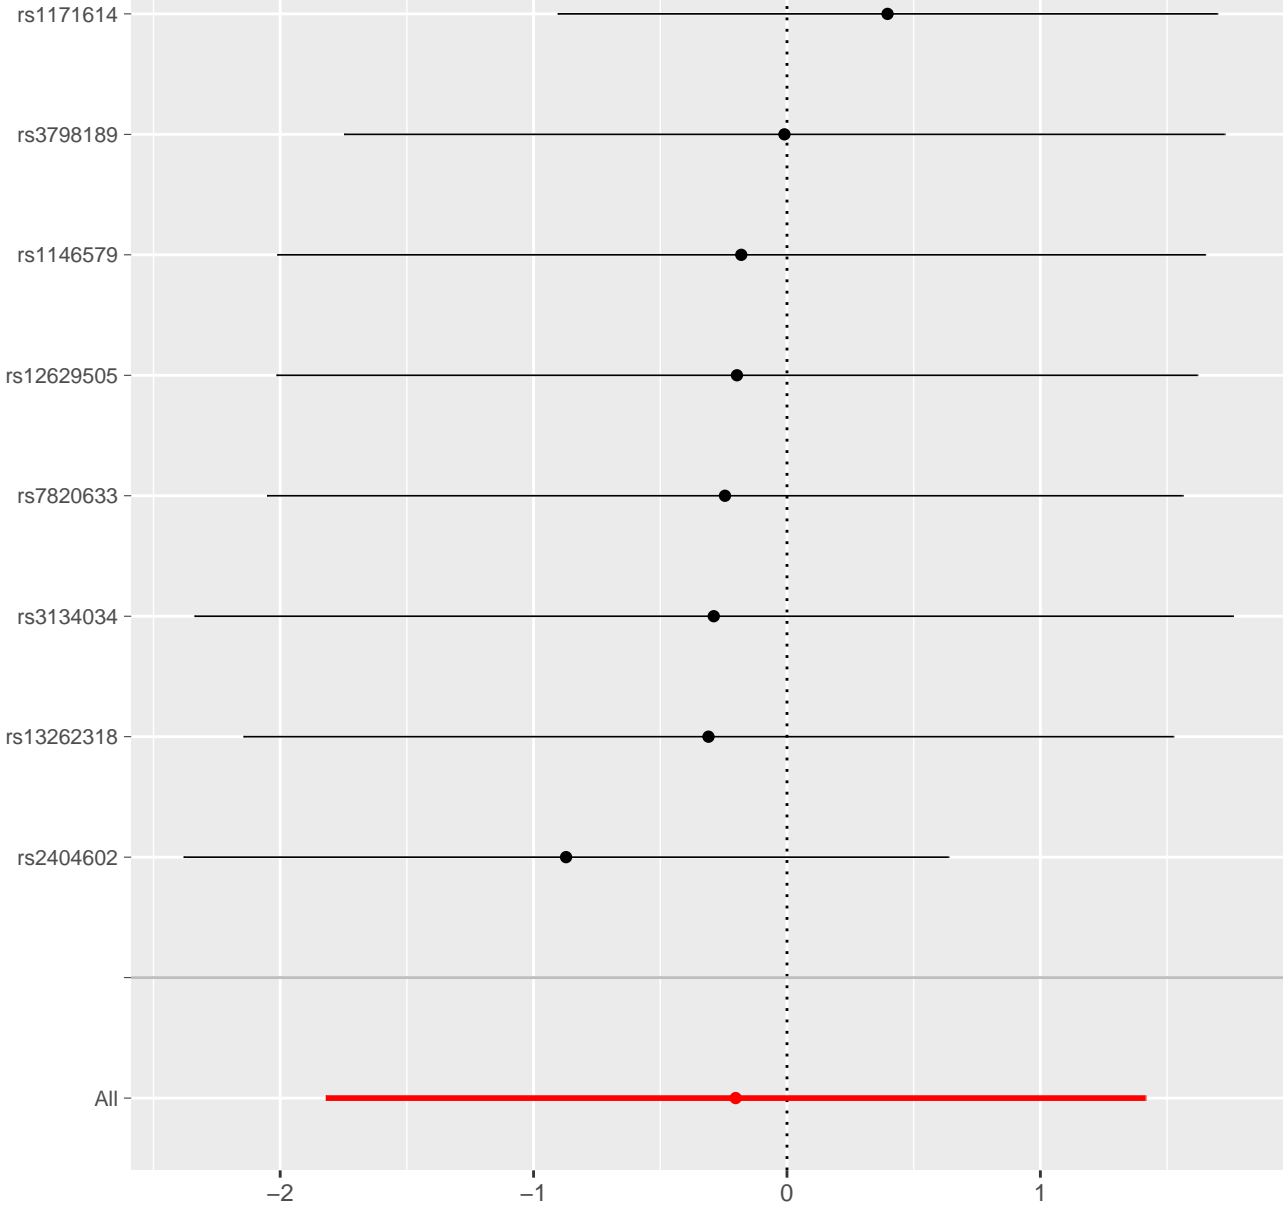

MR leave-one-out sensitivity analysis for 'M33441.metal.pos.txt.gz' on 'JUVEN\_ARTHR.gz'

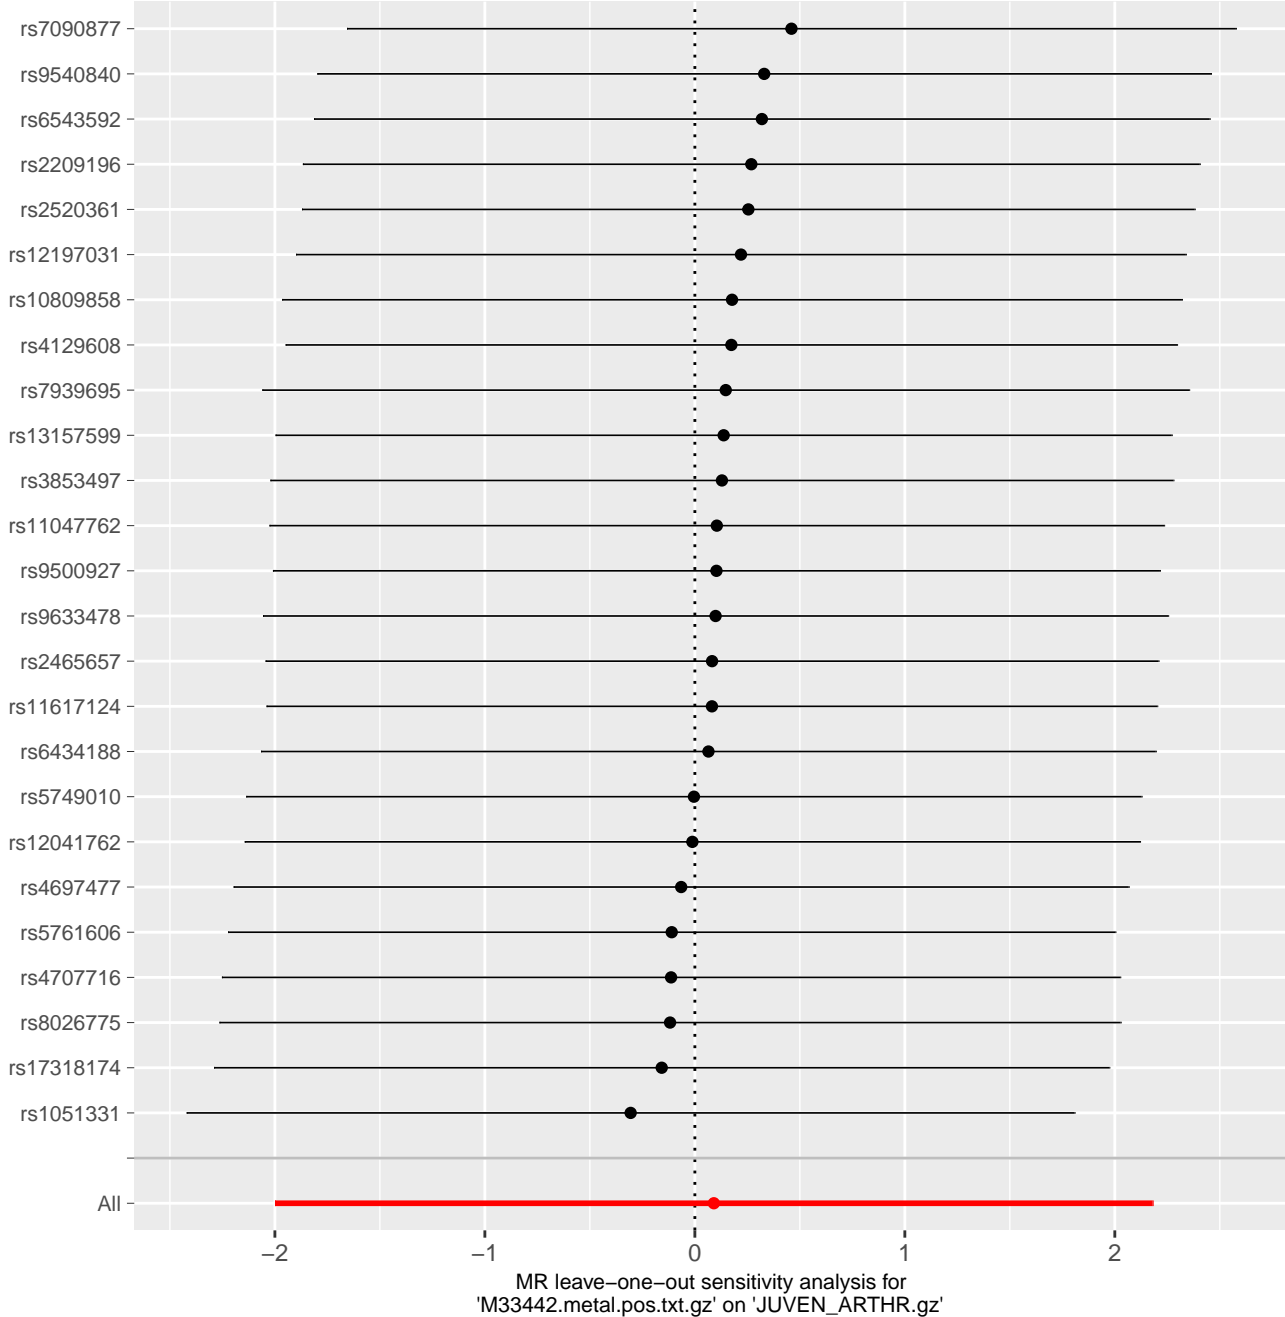

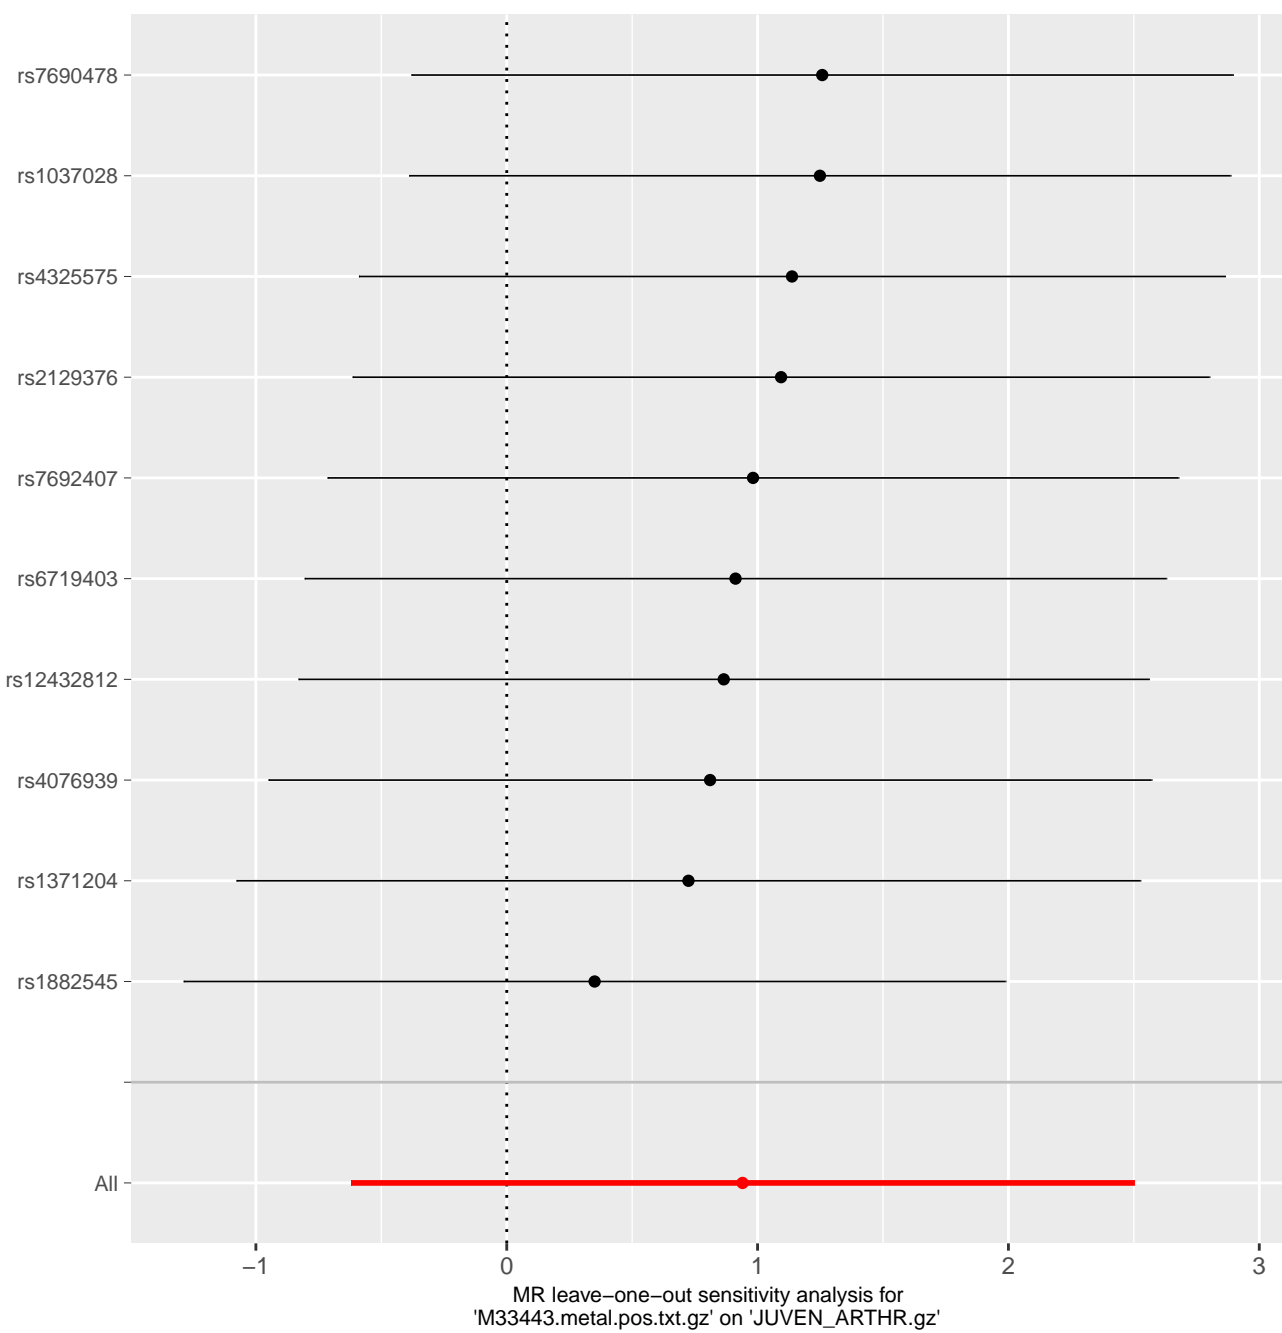

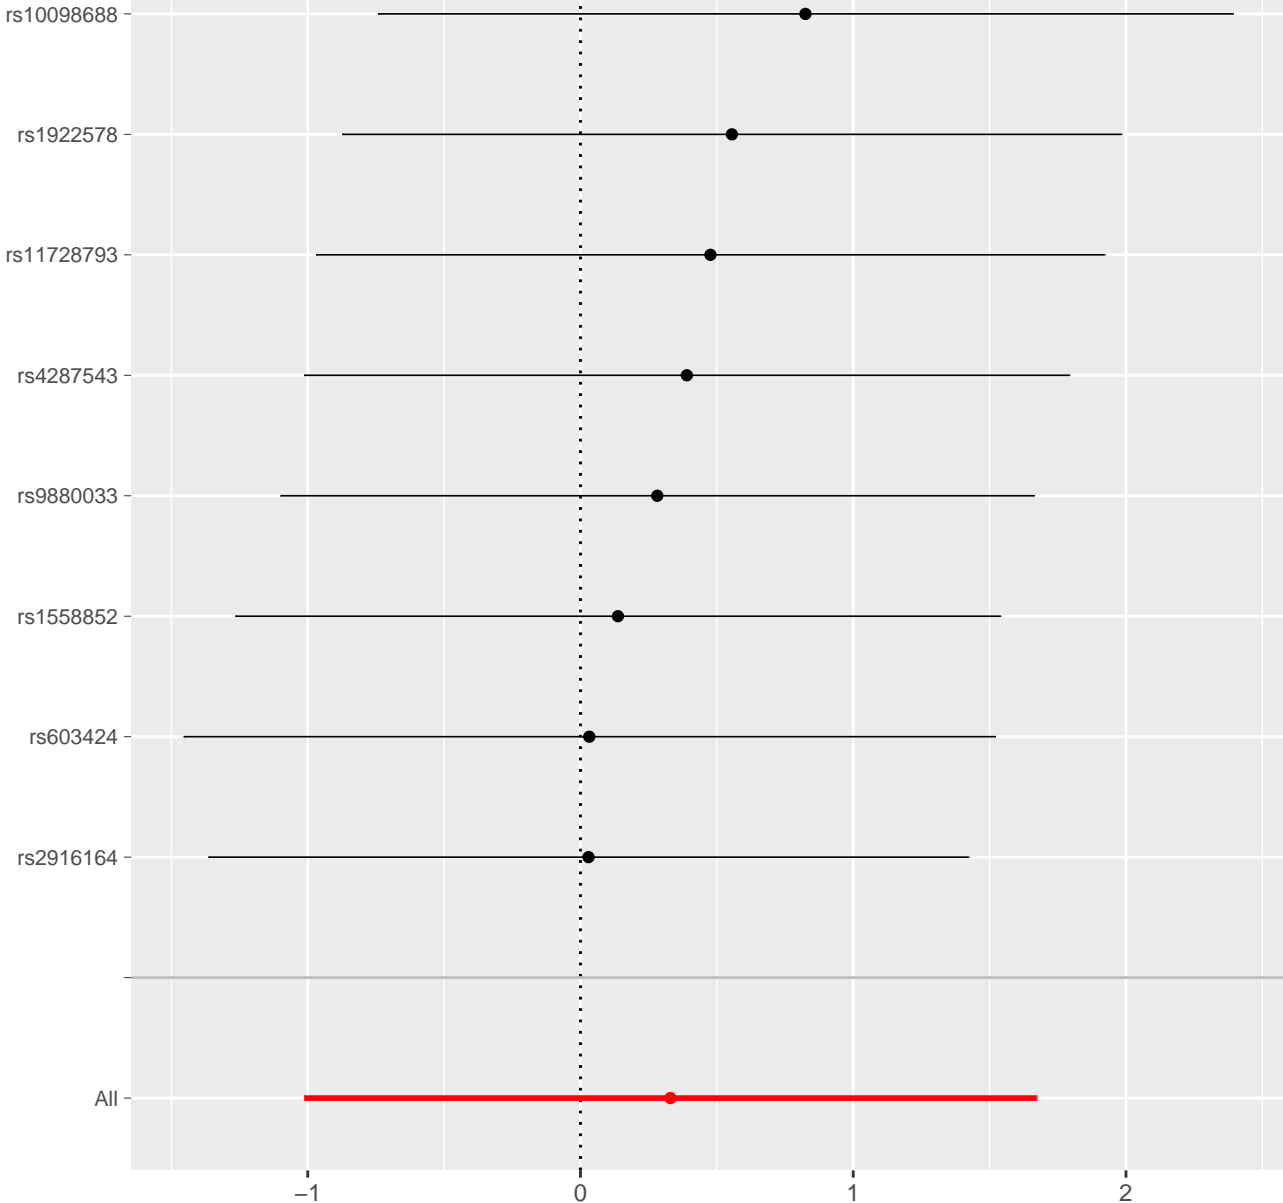

MR leave-one-out sensitivity analysis for 'M33447.metal.pos.txt.gz' on 'JUVEN\_ARTHR.gz'

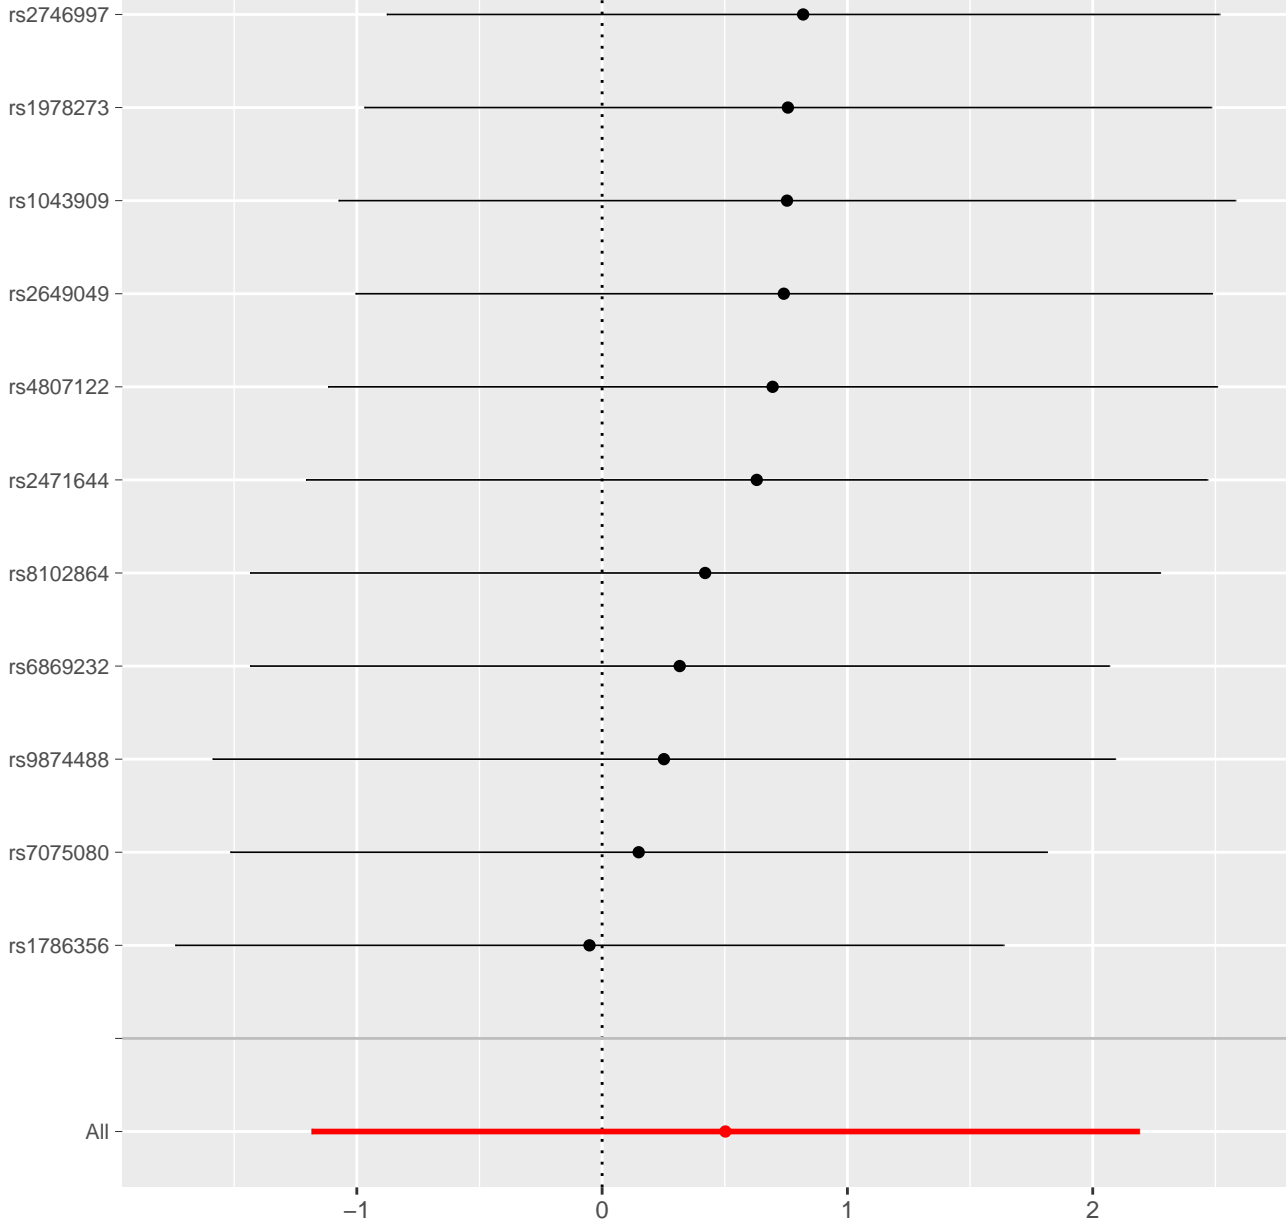

MR leave-one-out sensitivity analysis for 'M33453.metal.pos.txt.gz' on 'JUVEN\_ARTHR.gz'

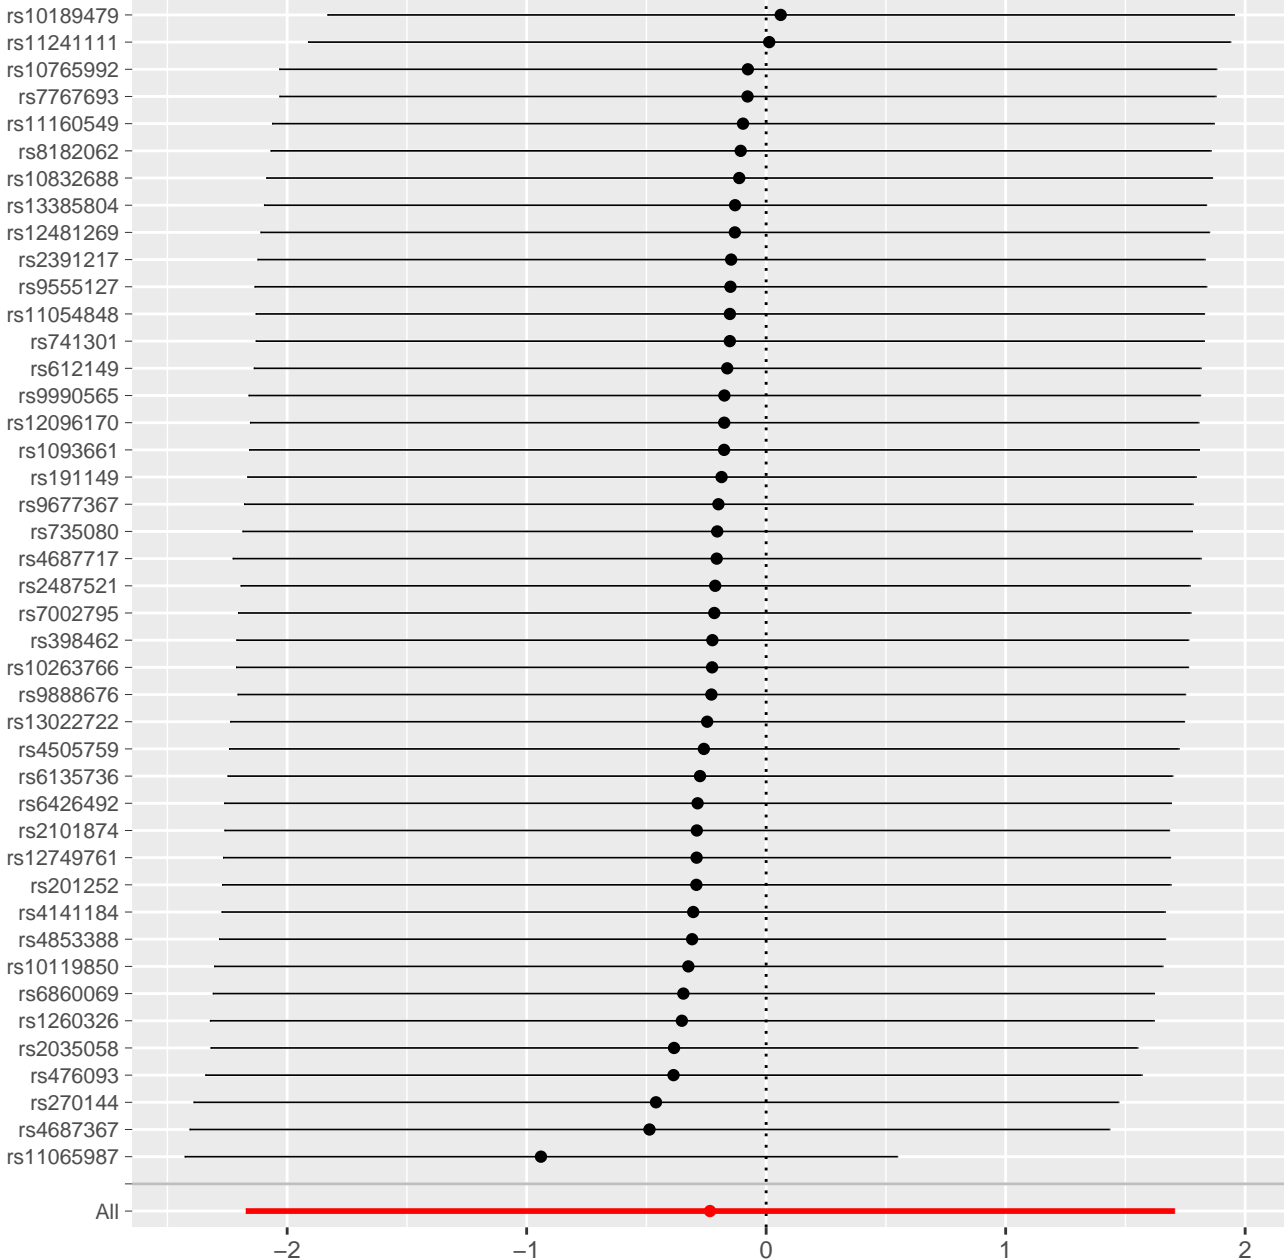

MR leave-one-out sensitivity analysis for 'M33477.metal.pos.txt.gz' on 'JUVEN\_ARTHR.gz'

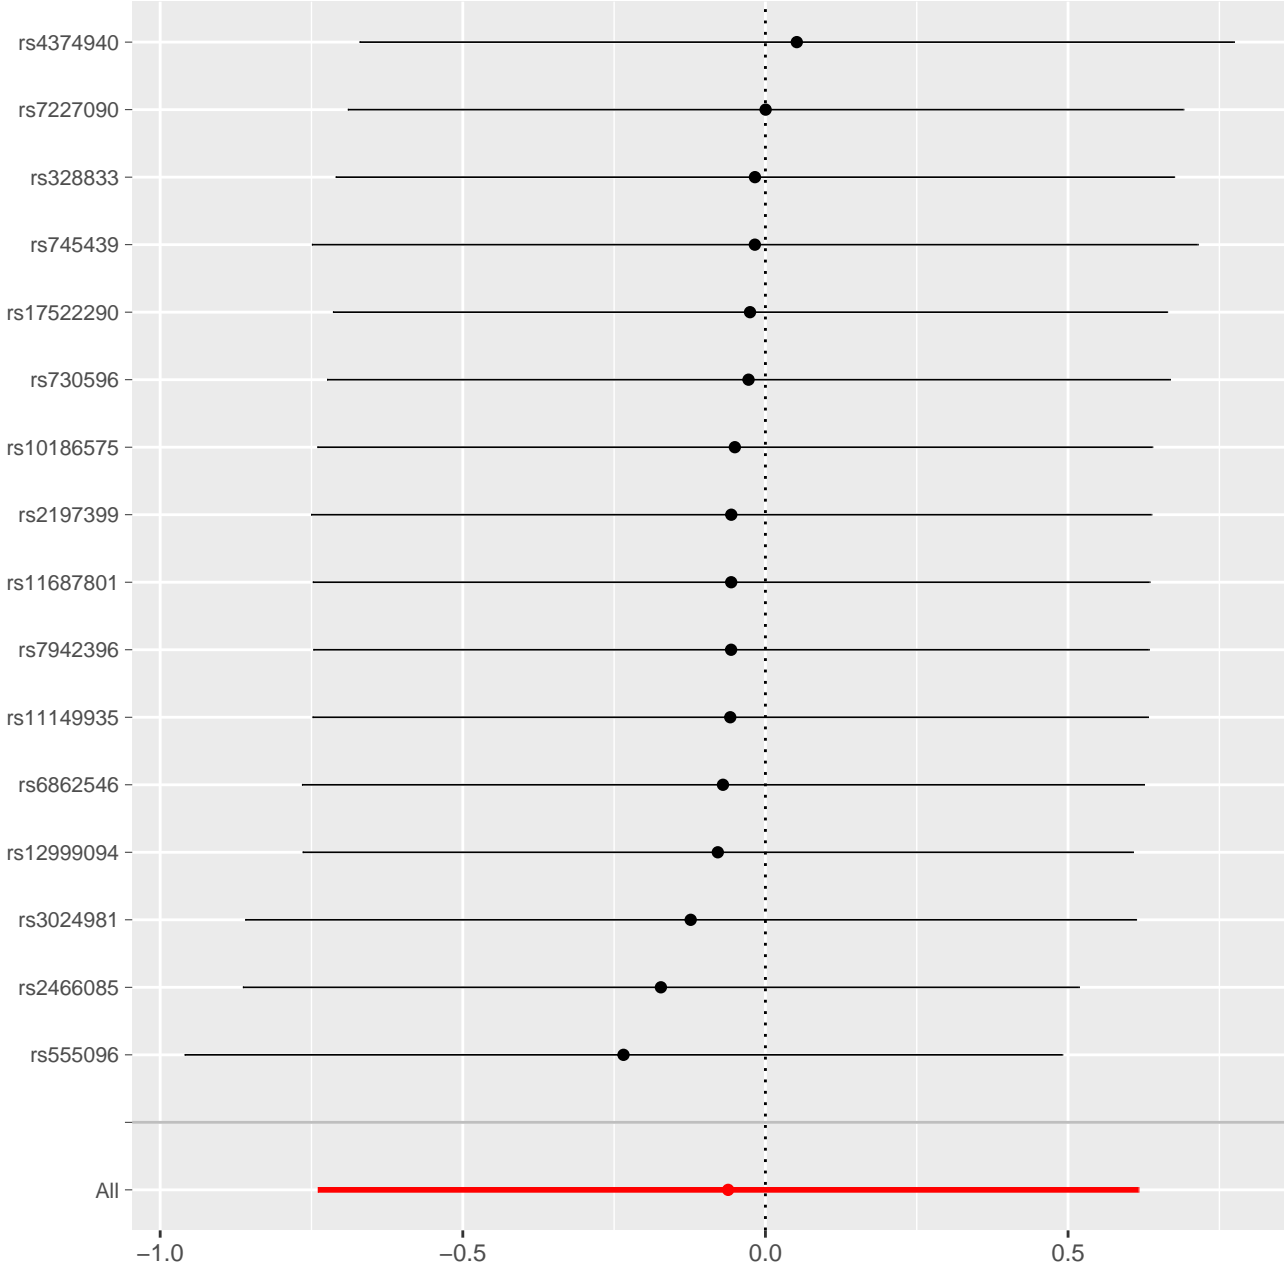



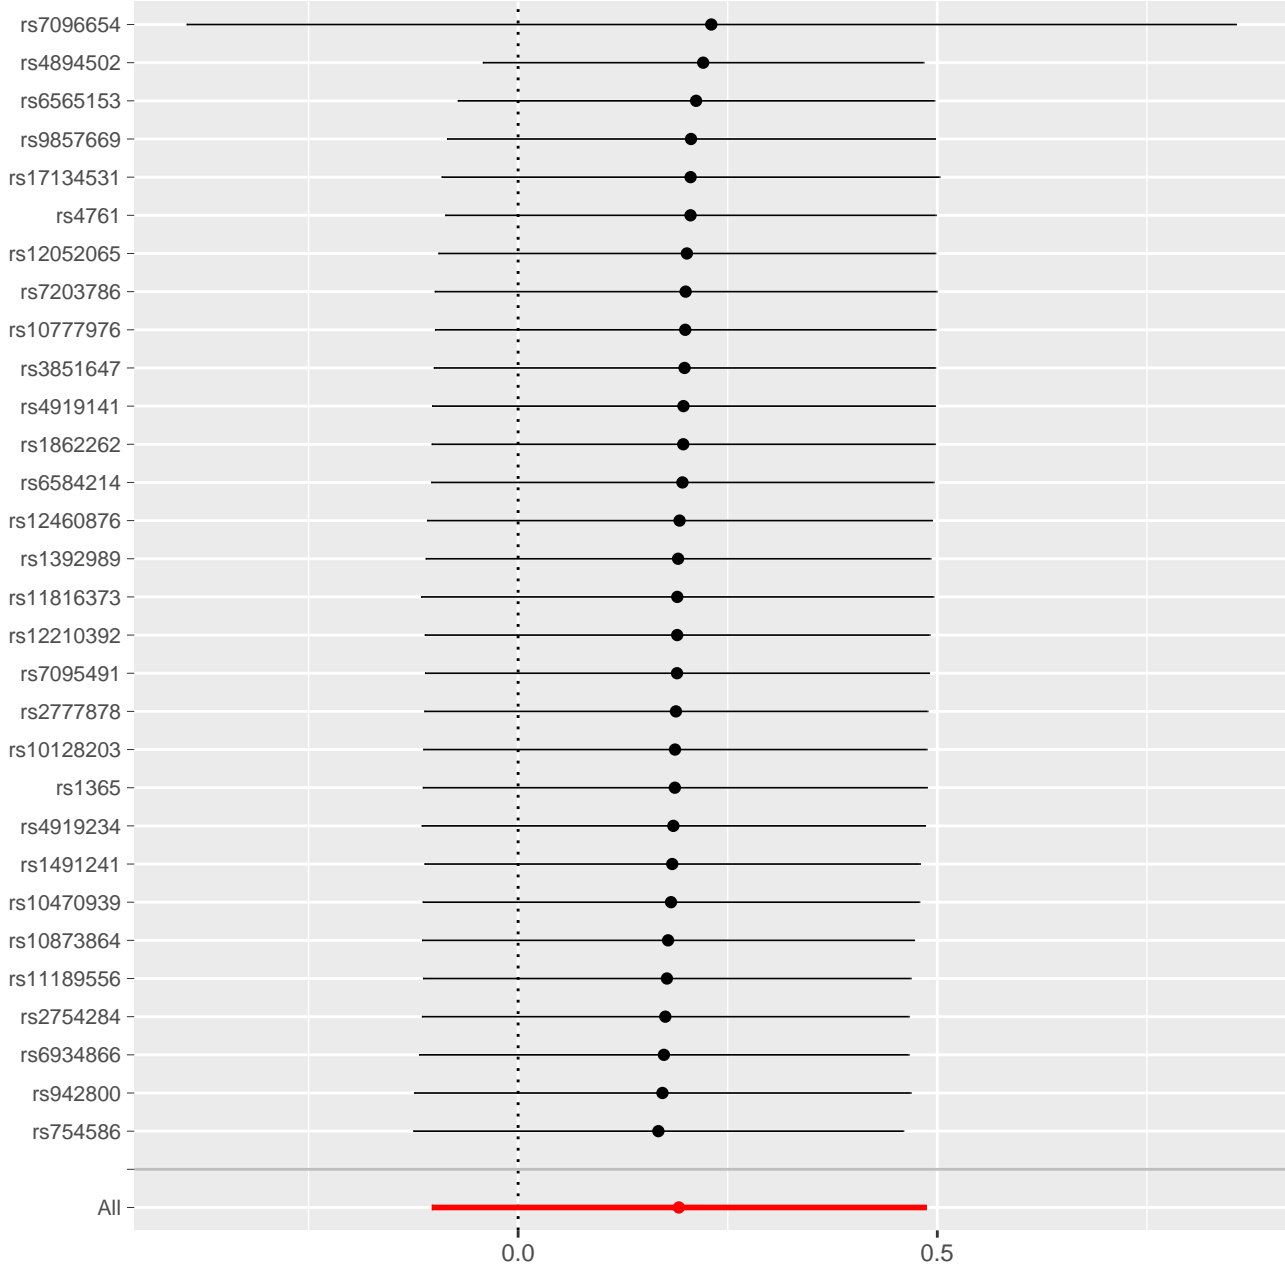

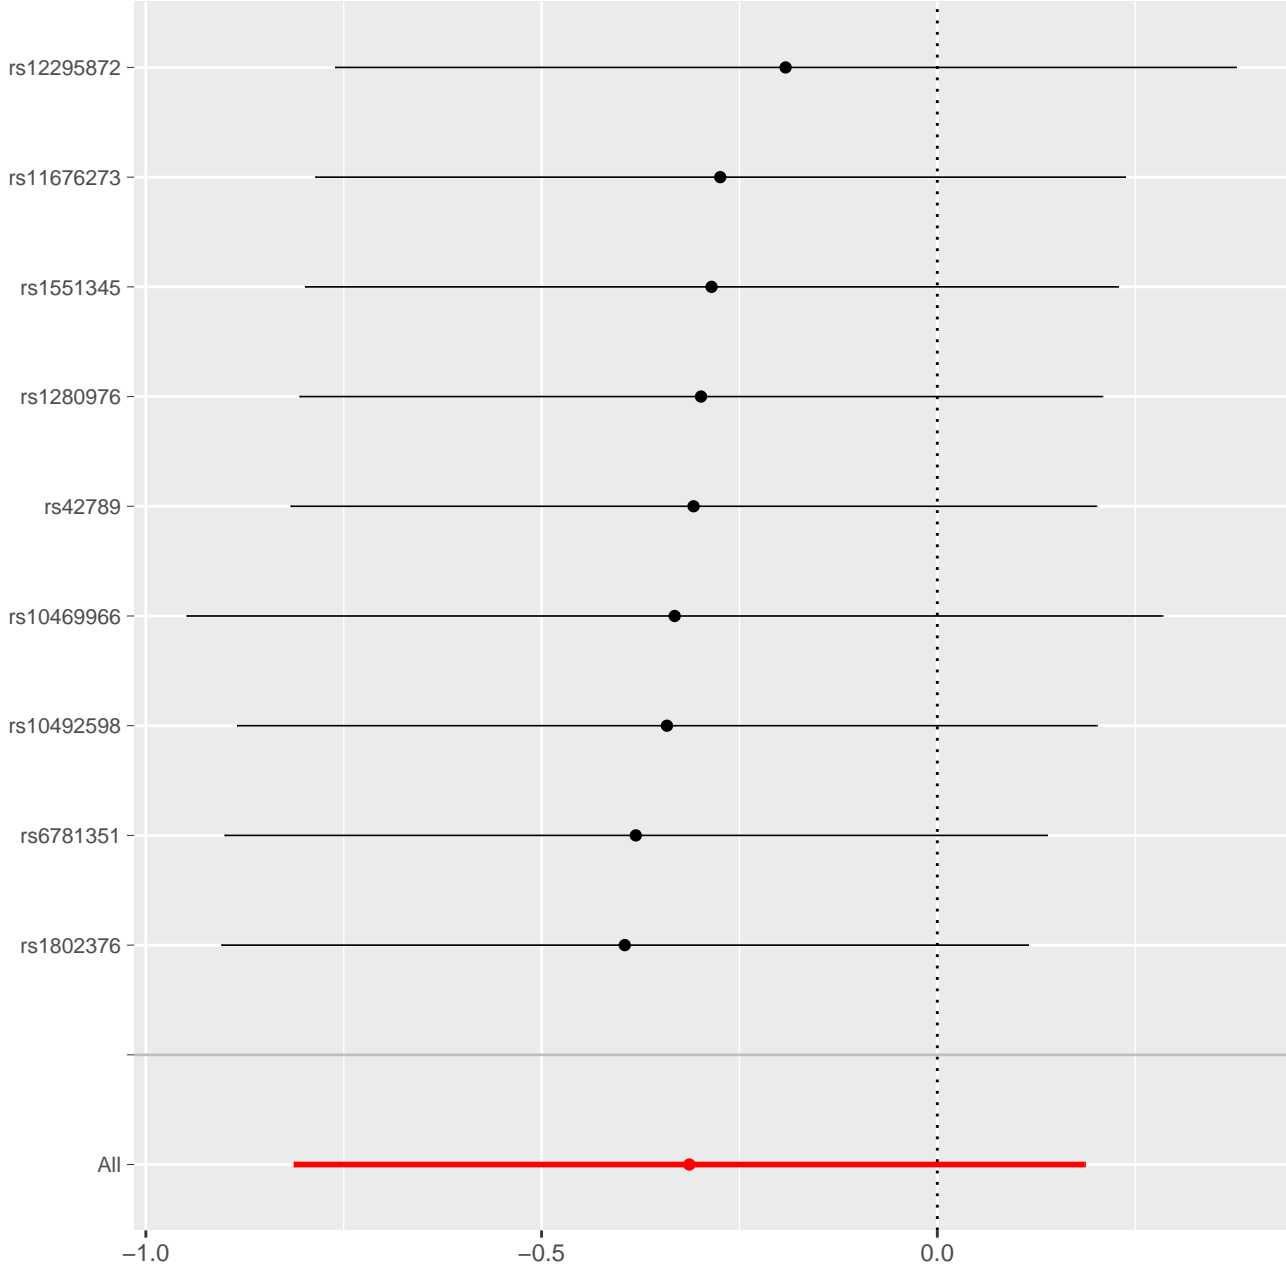

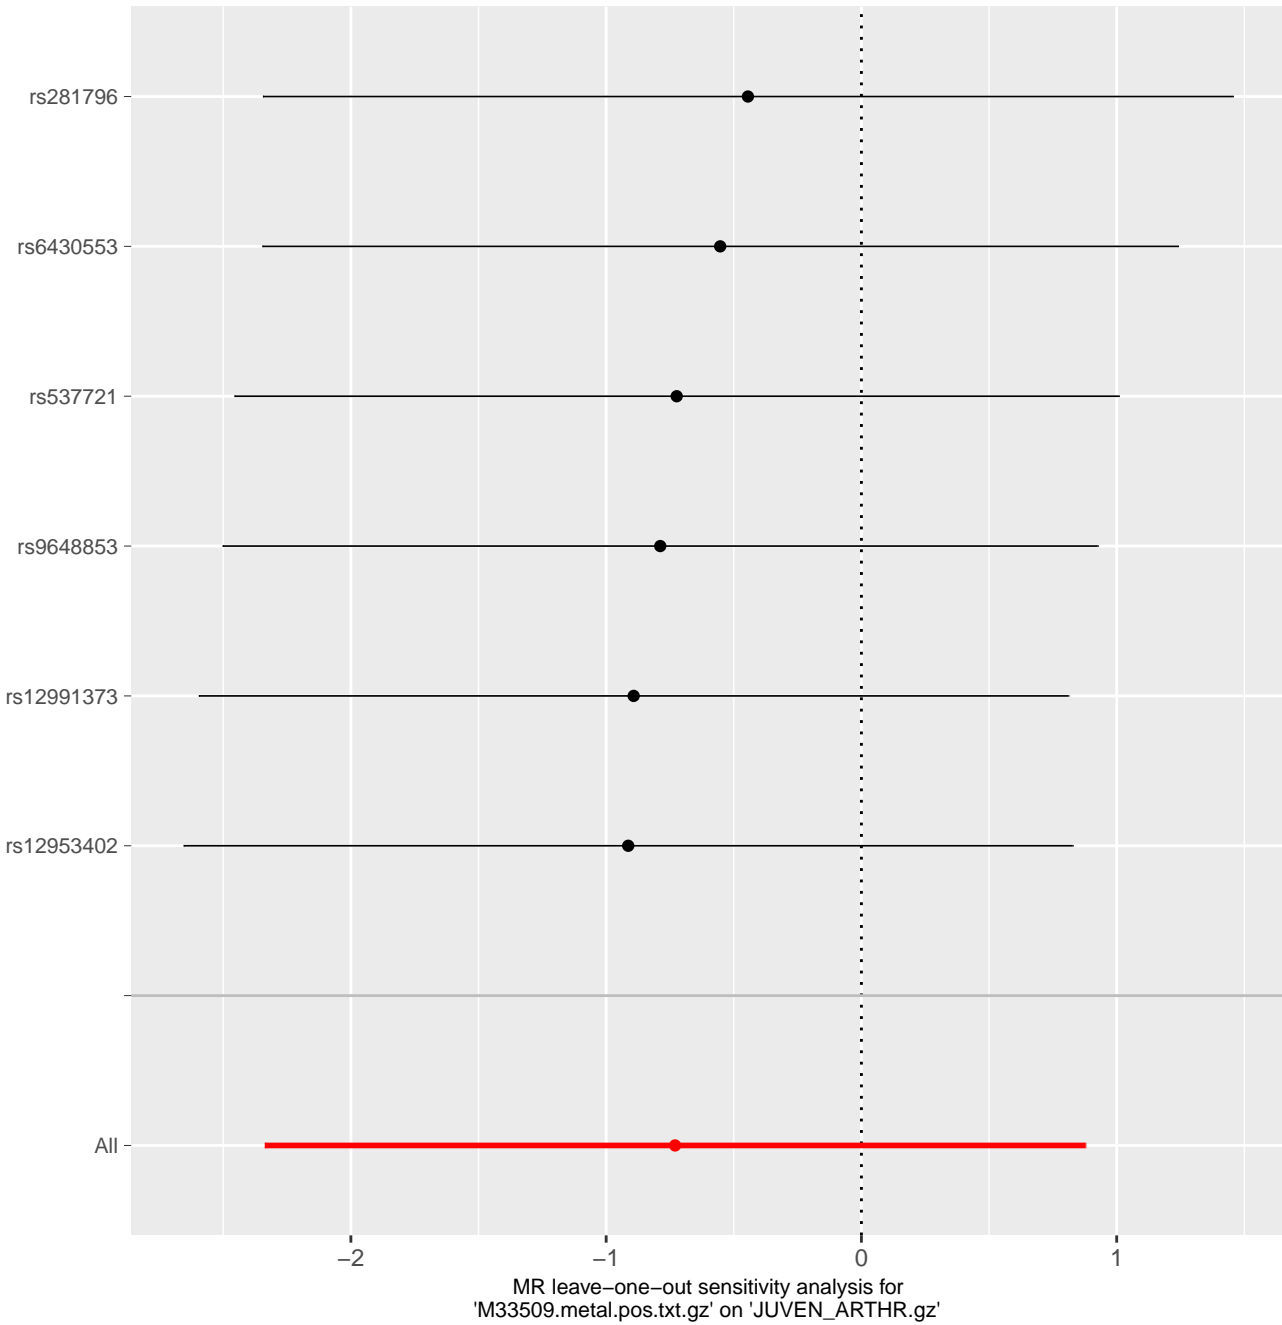

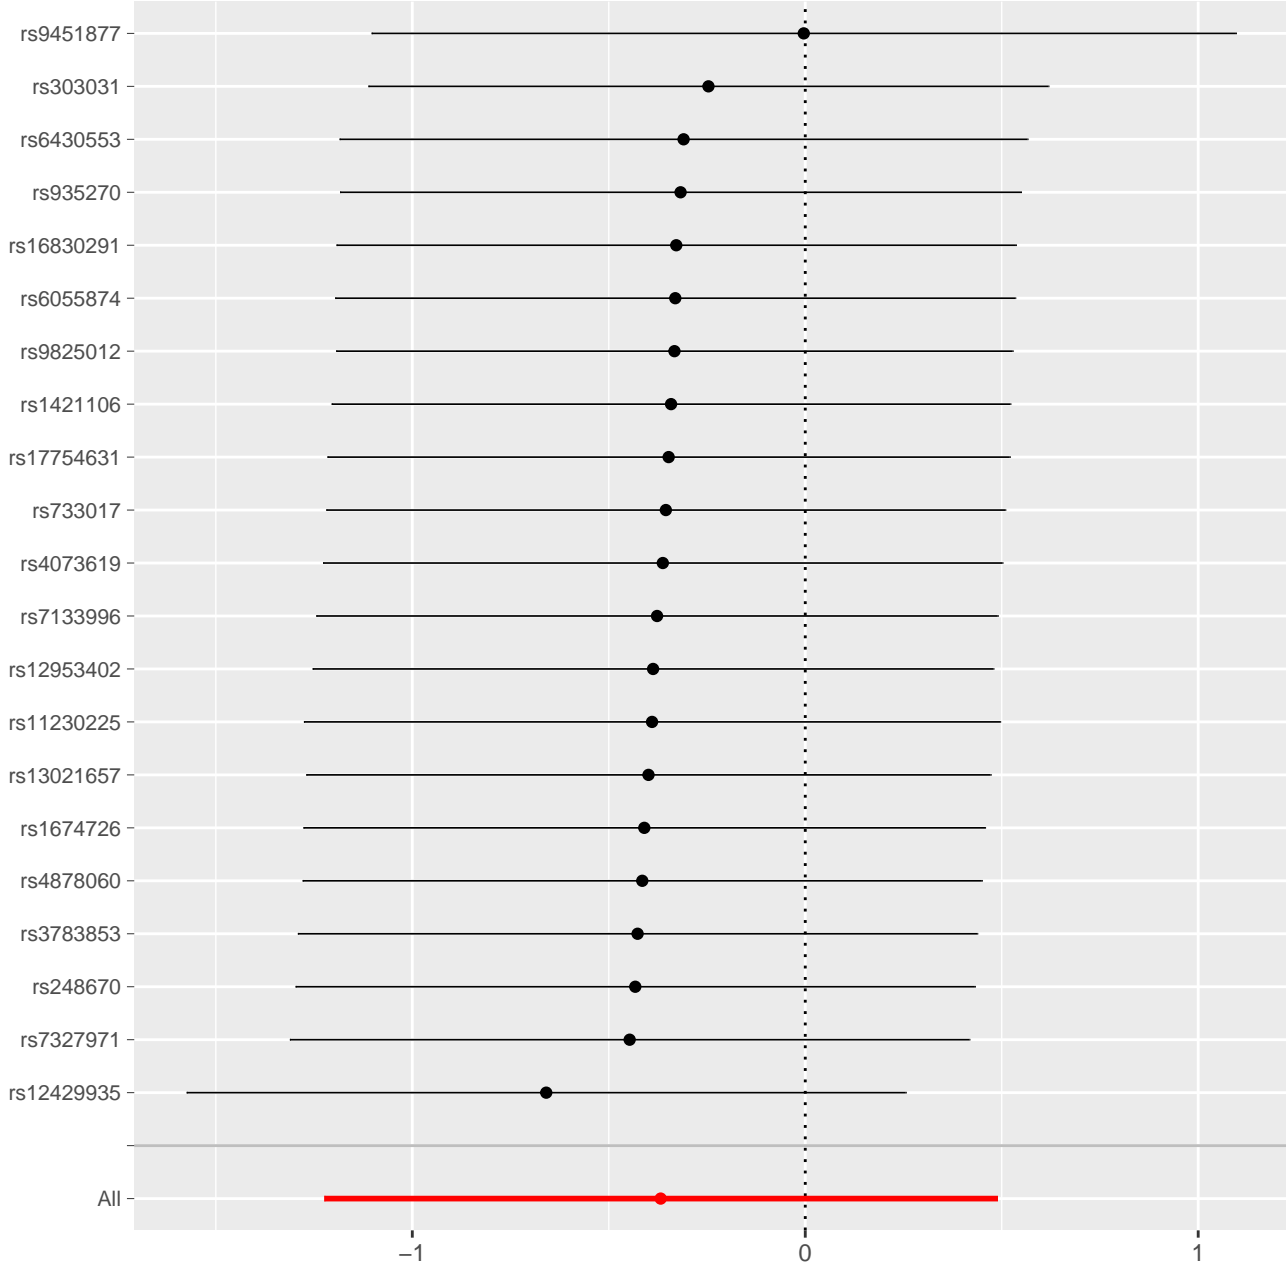

MR leave-one-out sensitivity analysis for 'M33510.metal.pos.txt.gz' on 'JUVEN\_ARTHR.gz'

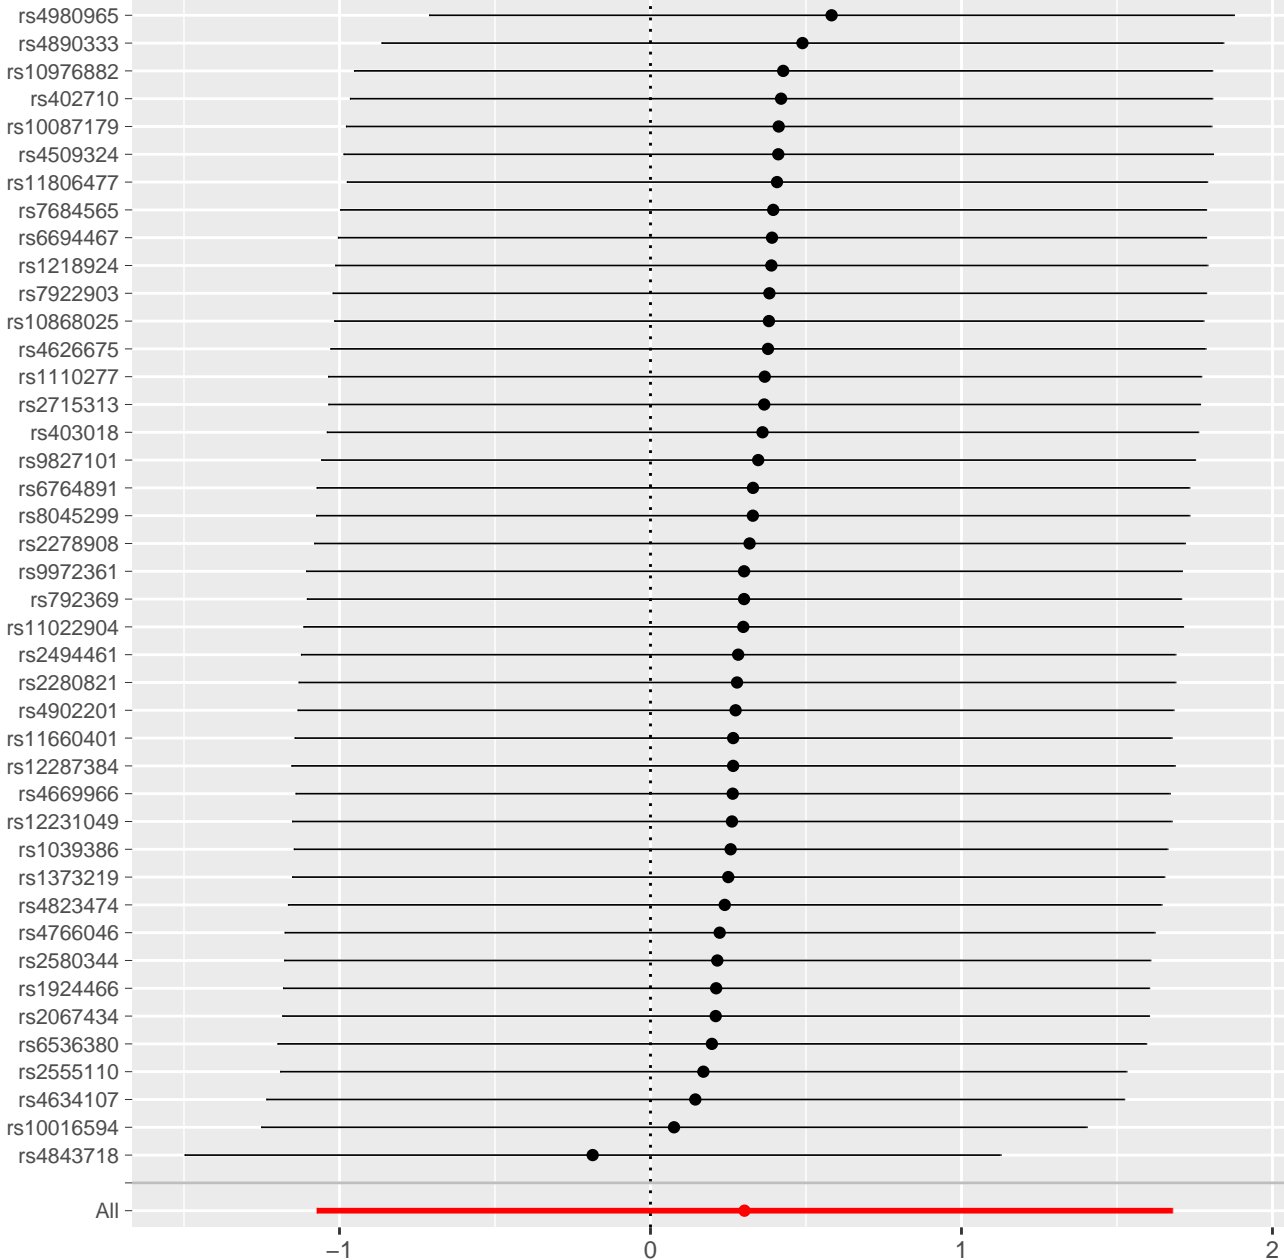

MR leave-one-out sensitivity analysis for 'M33515.metal.pos.txt.gz' on 'JUVEN\_ARTHR.gz'

rs7855332  
rs17081093  
rs6129197  
rs10966901  
rs10247235  
rs11623436  
rs6849330  
rs7338260  
rs12368489

All

-0.5 0.0 0.5 1.0

MR leave-one-out sensitivity analysis for 'M33531.metal.pos.txt.gz' on 'JUVEN\_ARTHR.gz'

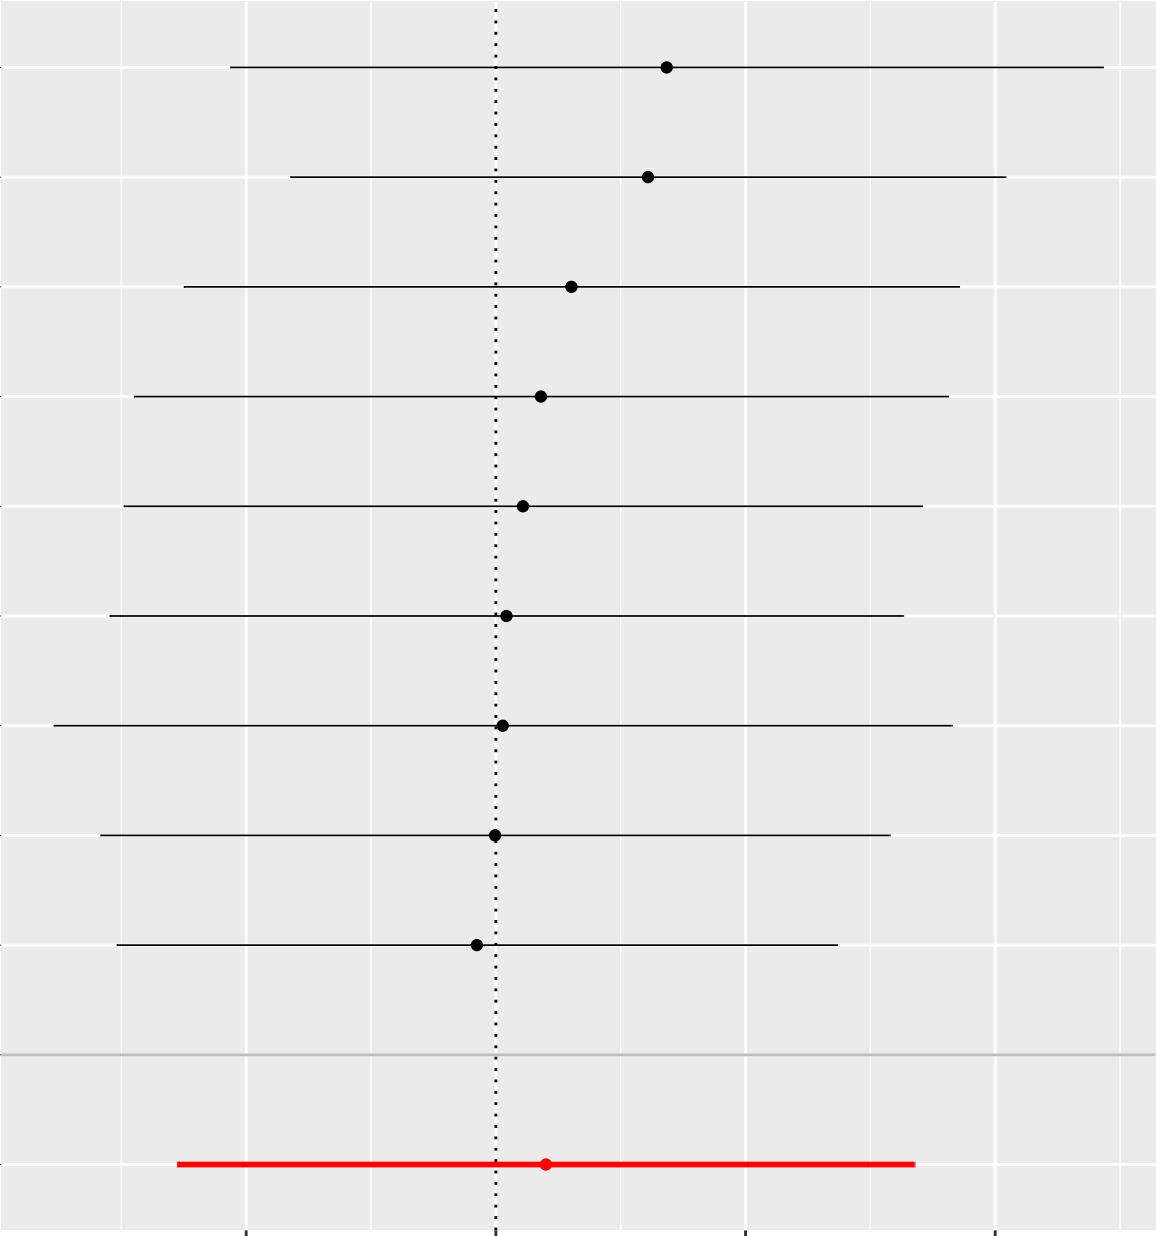

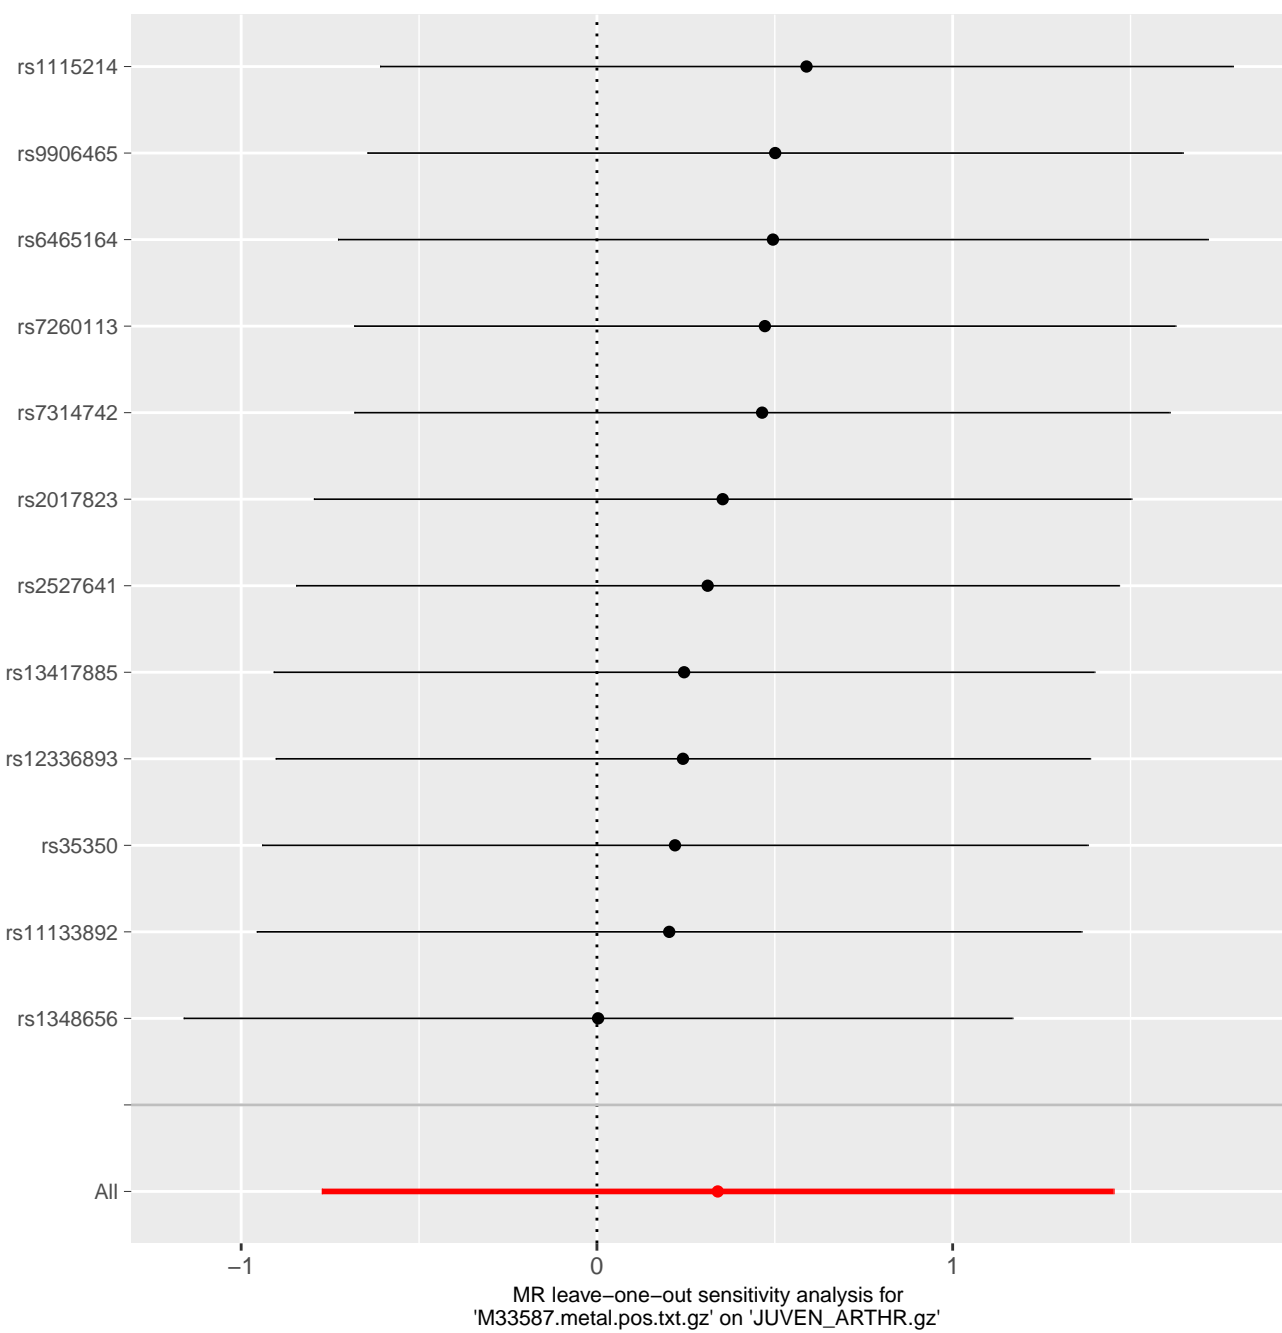

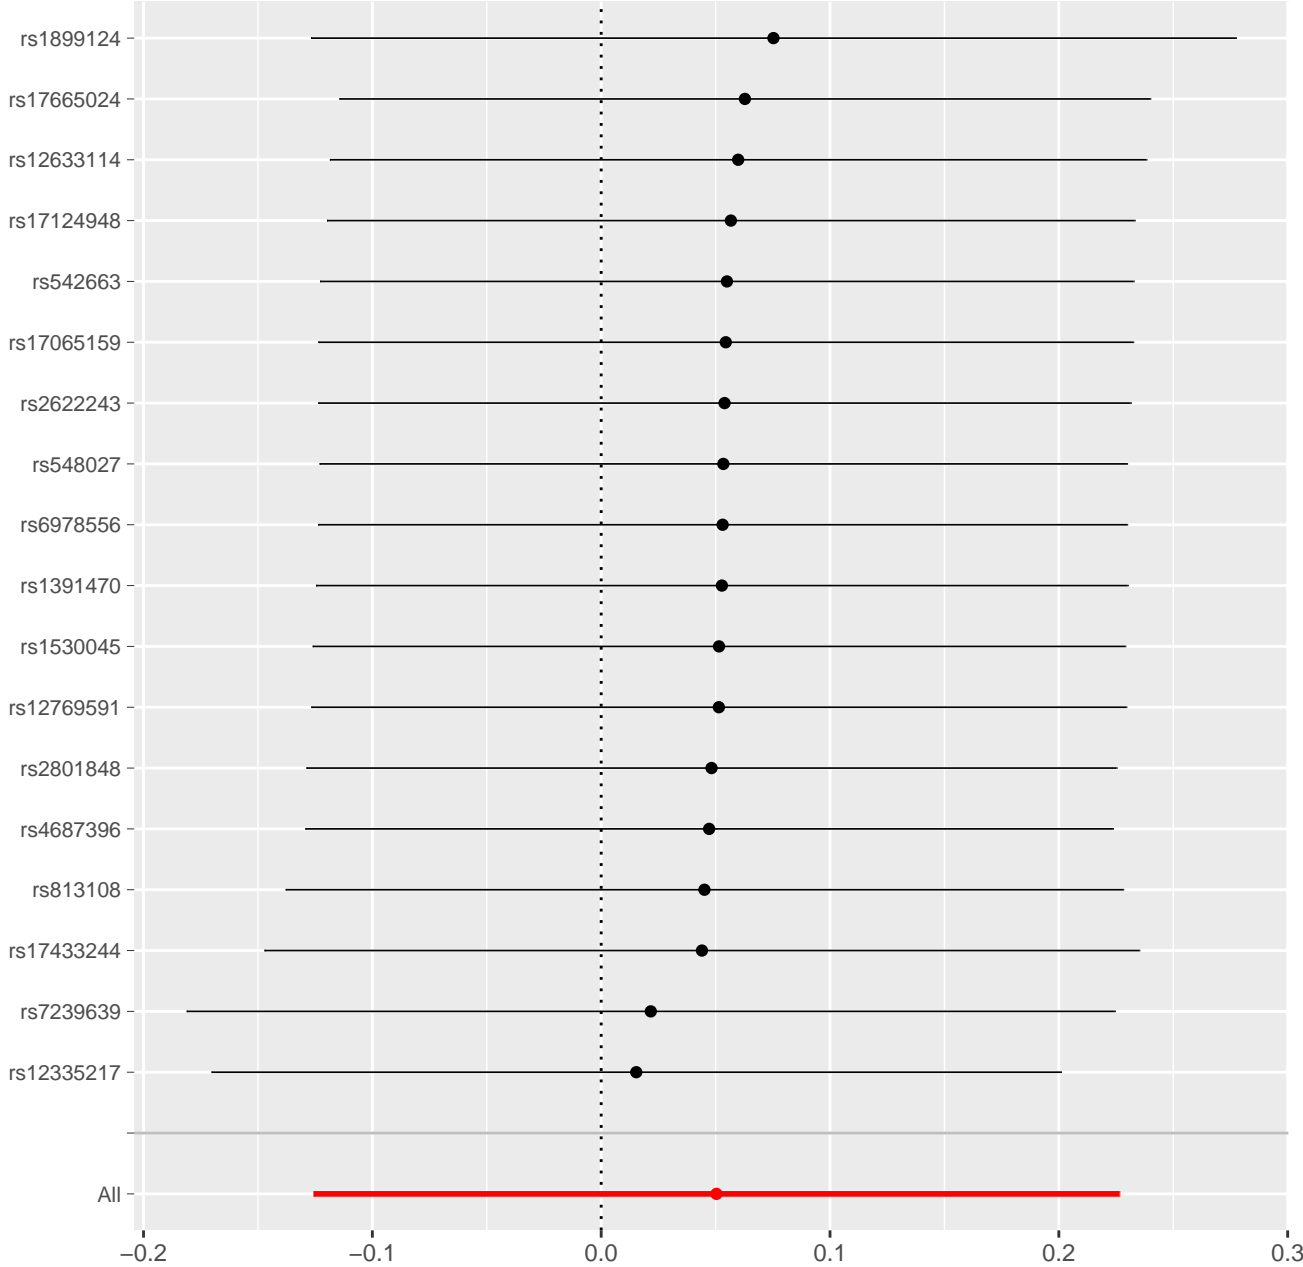



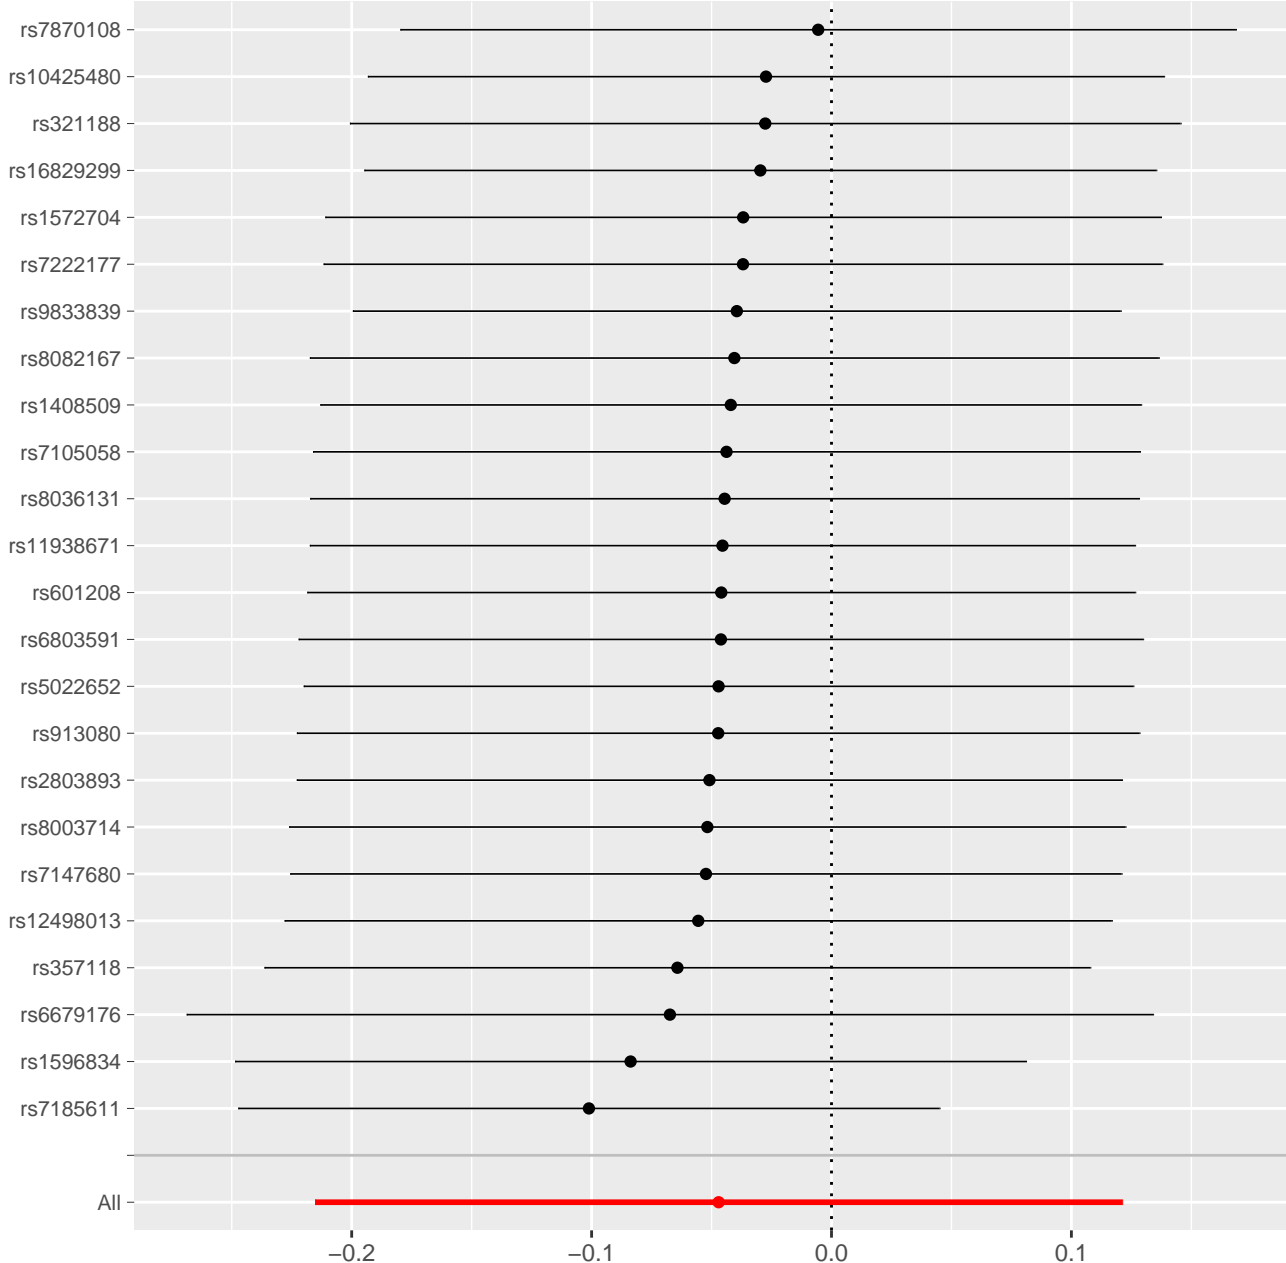

MR leave-one-out sensitivity analysis for 'M33610.metal.pos.txt.gz' on 'JUVEN\_ARTHR.gz'

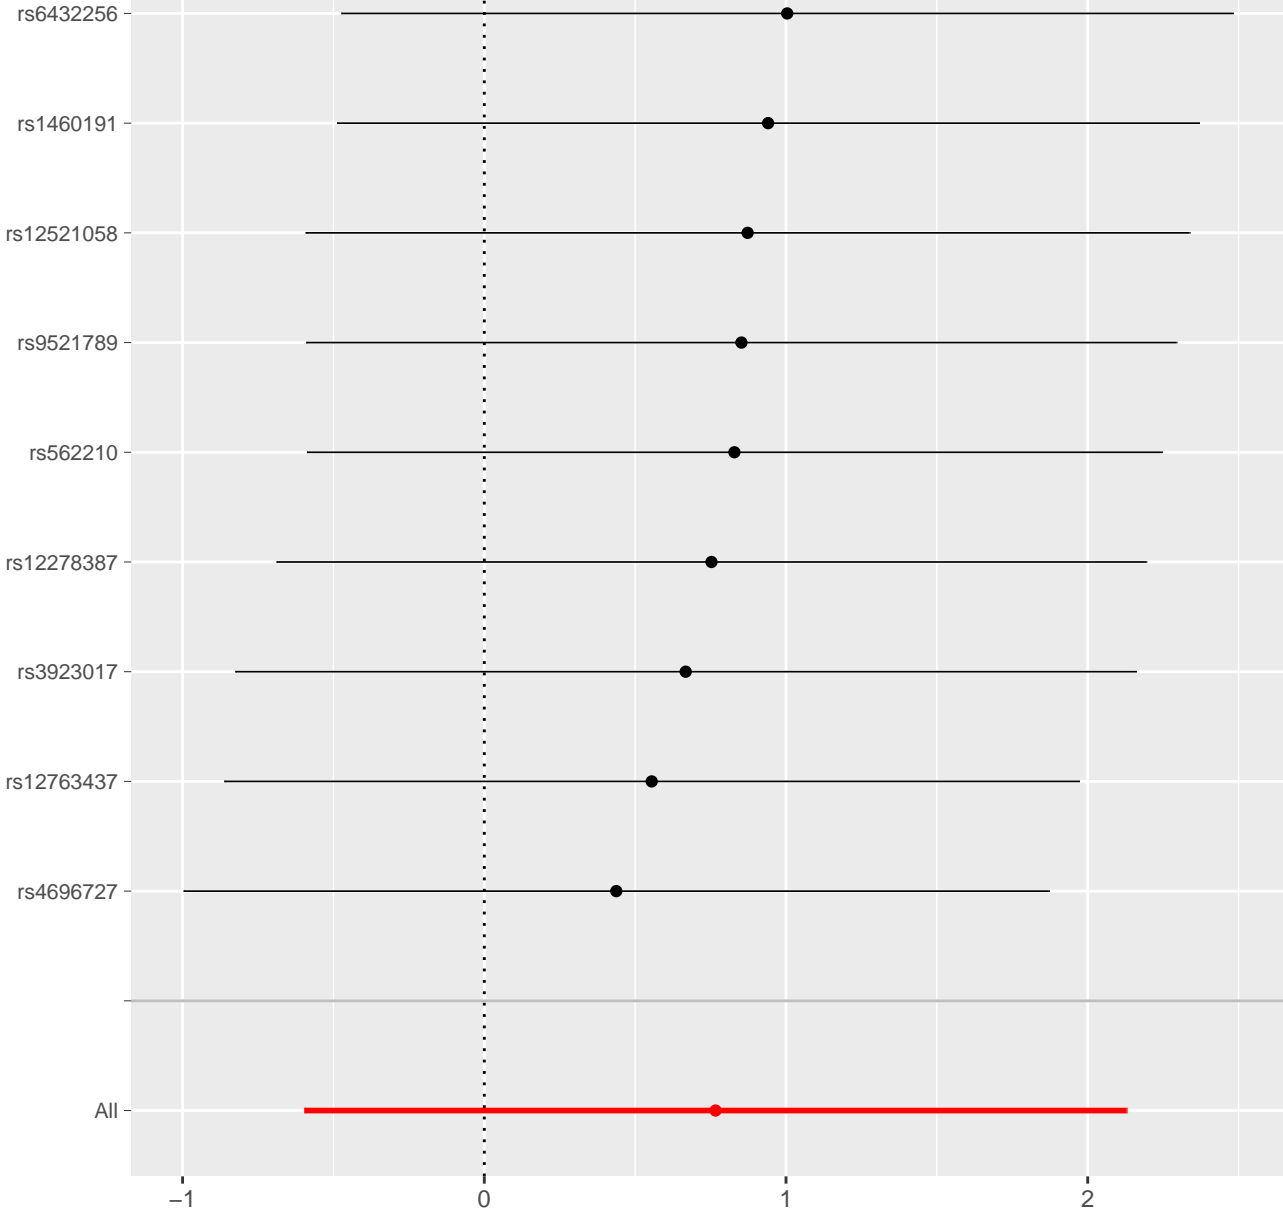

MR leave-one-out sensitivity analysis for 'M33627.metal.pos.txt.gz' on 'JUVEN\_ARTHR.gz'

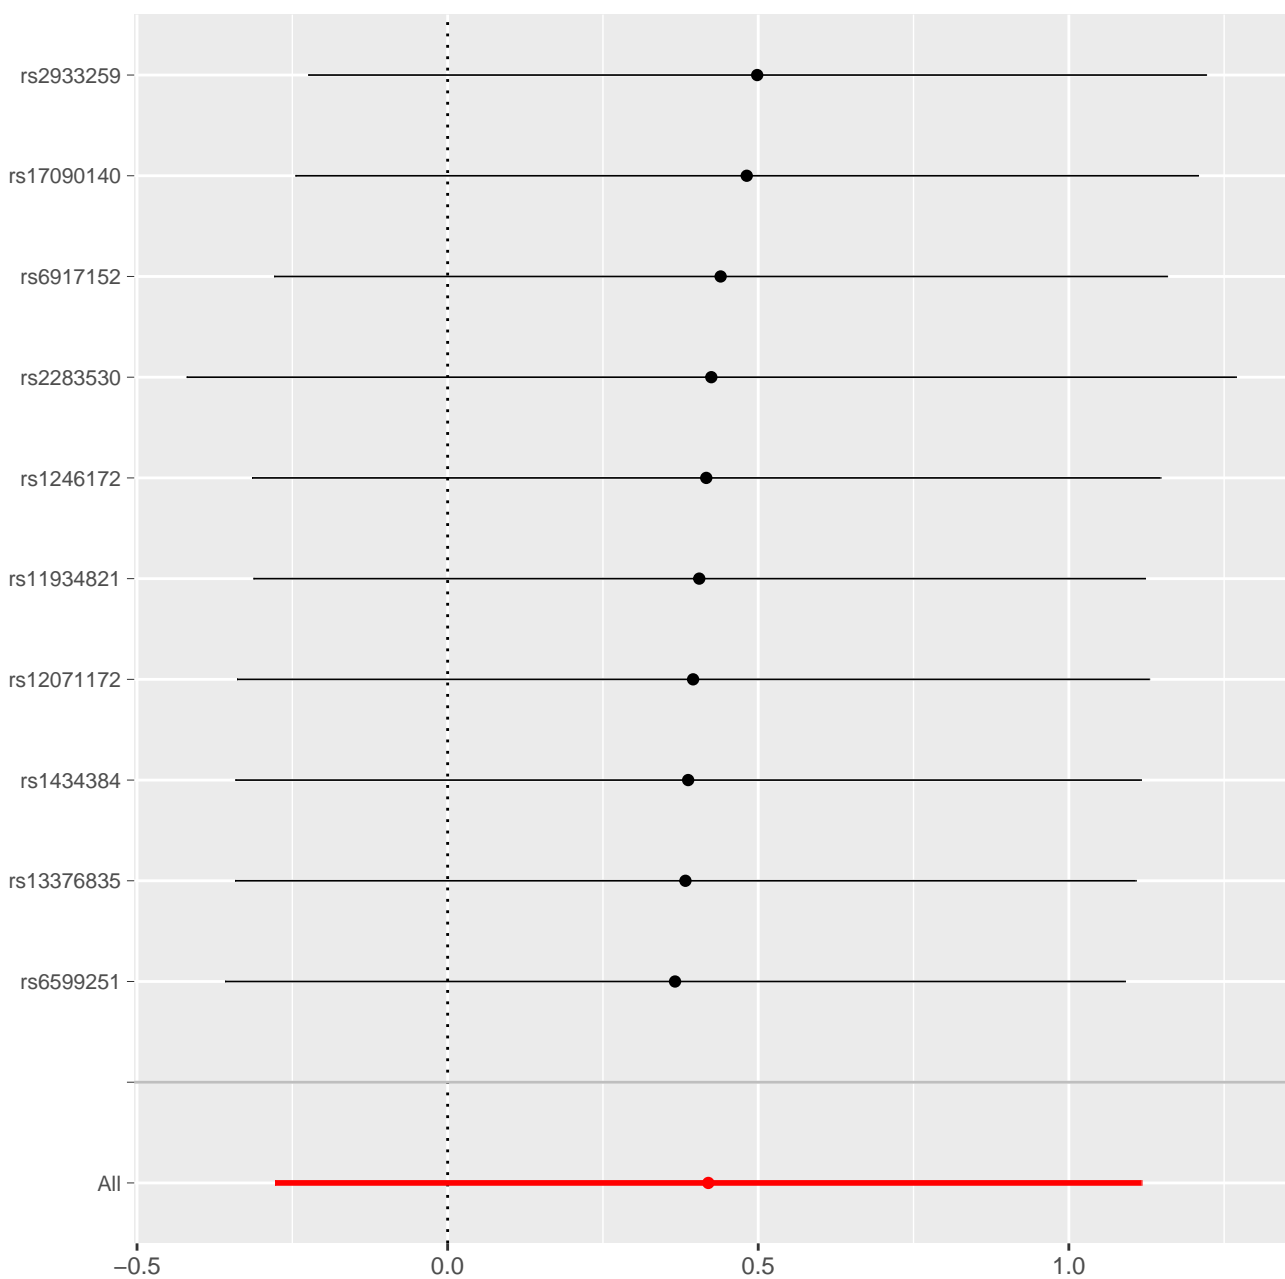

rs1993342  
rs830133  
rs10186642  
rs10794793  
rs719203  
rs262749  
rs8096862  
rs2171596  
All

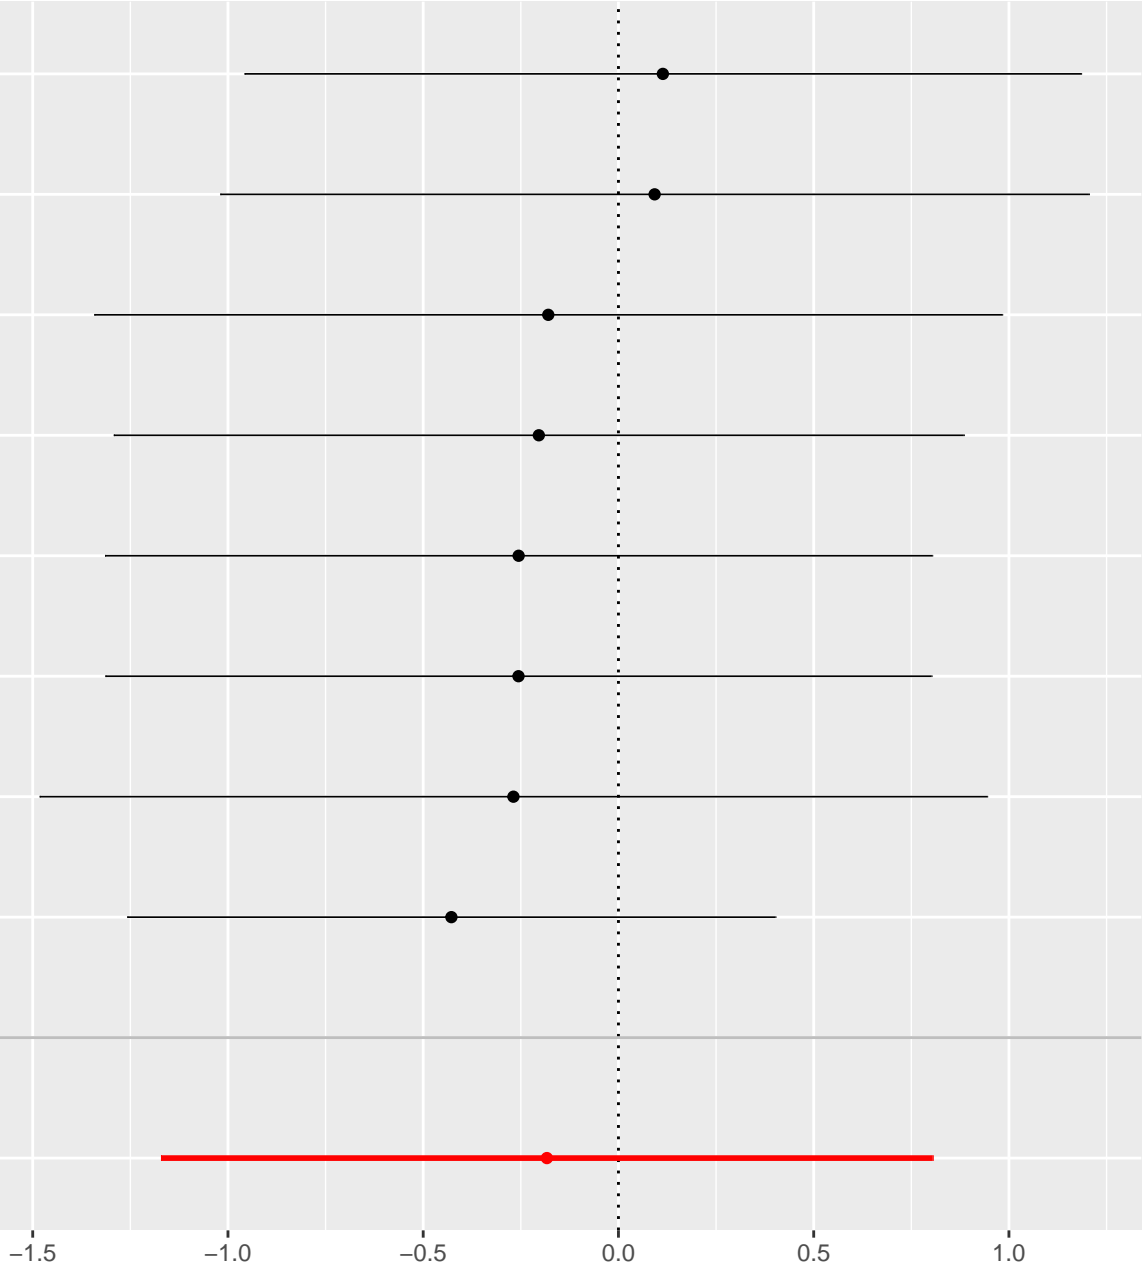

MR leave-one-out sensitivity analysis for 'M33637.metal.pos.txt.gz' on 'JUVEN\_ARTHR.gz'

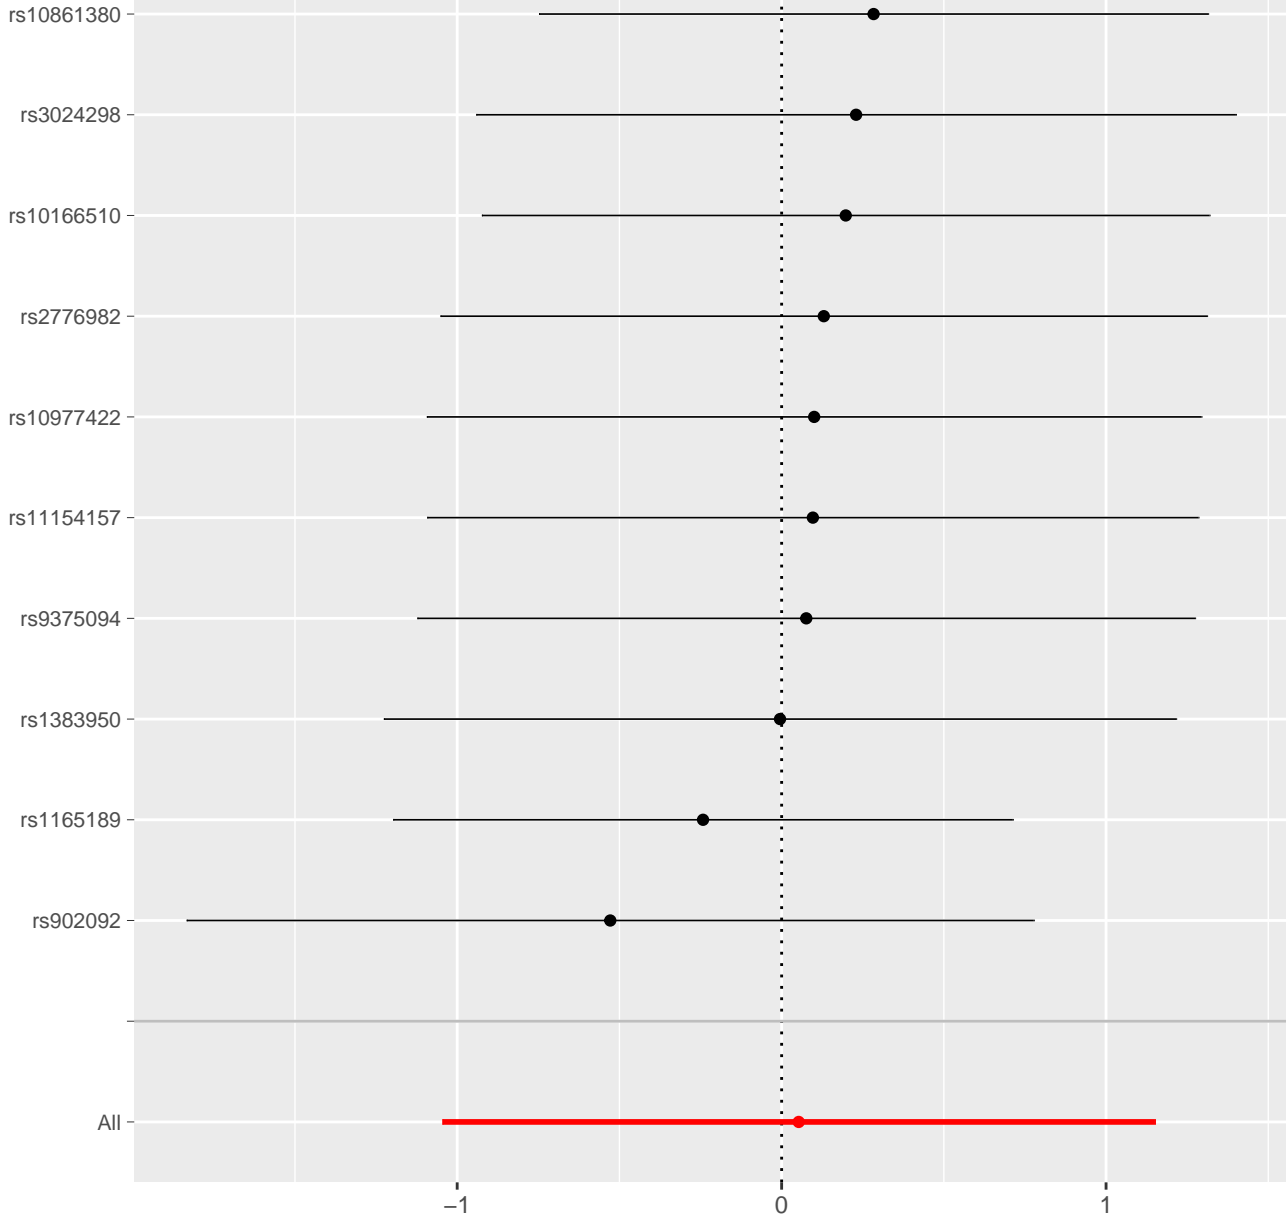

MR leave-one-out sensitivity analysis for 'M33638.metal.pos.txt.gz' on 'JUVEN\_ARTHR.gz'

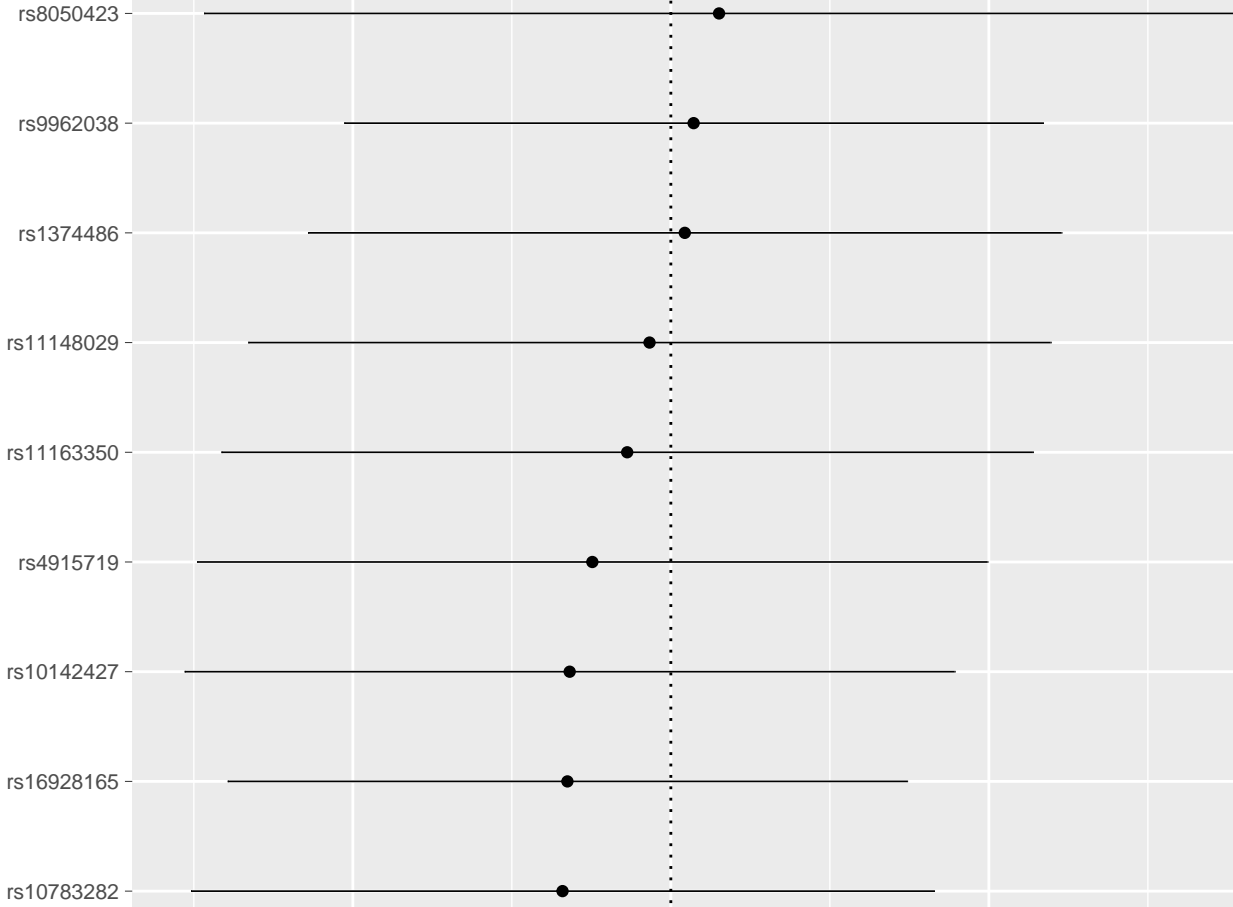

All

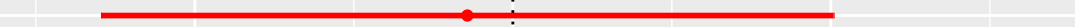

MR leave-one-out sensitivity analysis for 'M33652.metal.pos.txt.gz' on 'JUVEN\_ARTHR.gz'

rs7427160  
rs4680  
rs7173557  
rs961787  
rs11062646  
rs2540742  
rs12692453  
rs12404165  
rs10881815  
rs10768365  
All

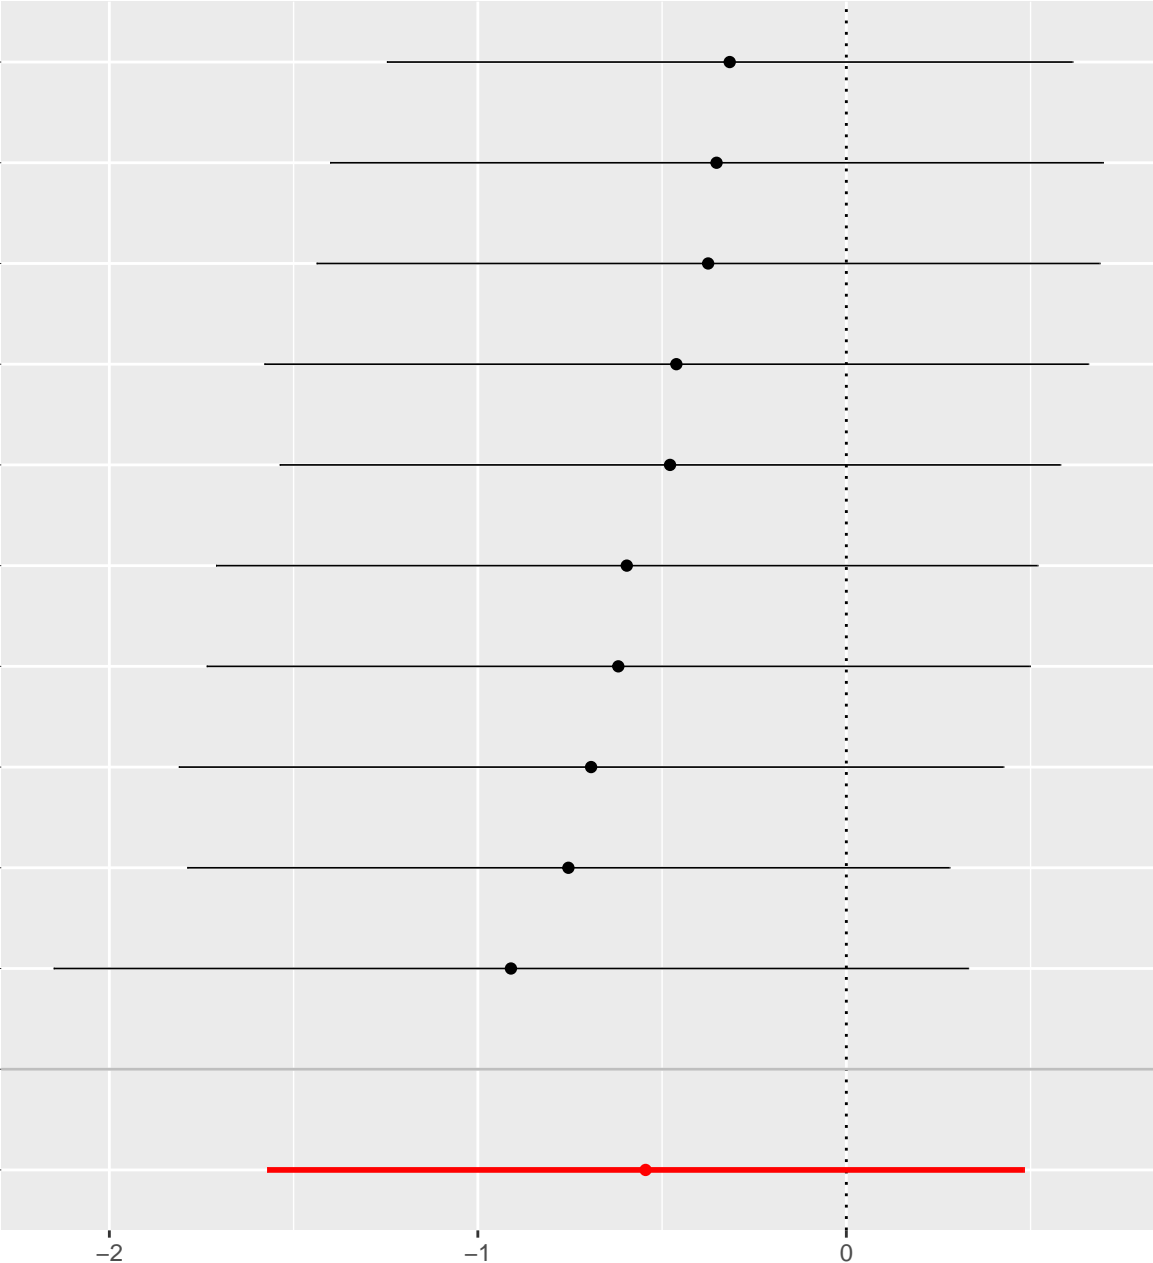

MR leave-one-out sensitivity analysis for 'M33653.metal.pos.txt.gz' on 'JUVEN\_ARTHR.gz'

rs10779577  
rs11046265  
rs17358216  
rs10074013  
rs13146757  
rs4437239  
rs1892513  
All

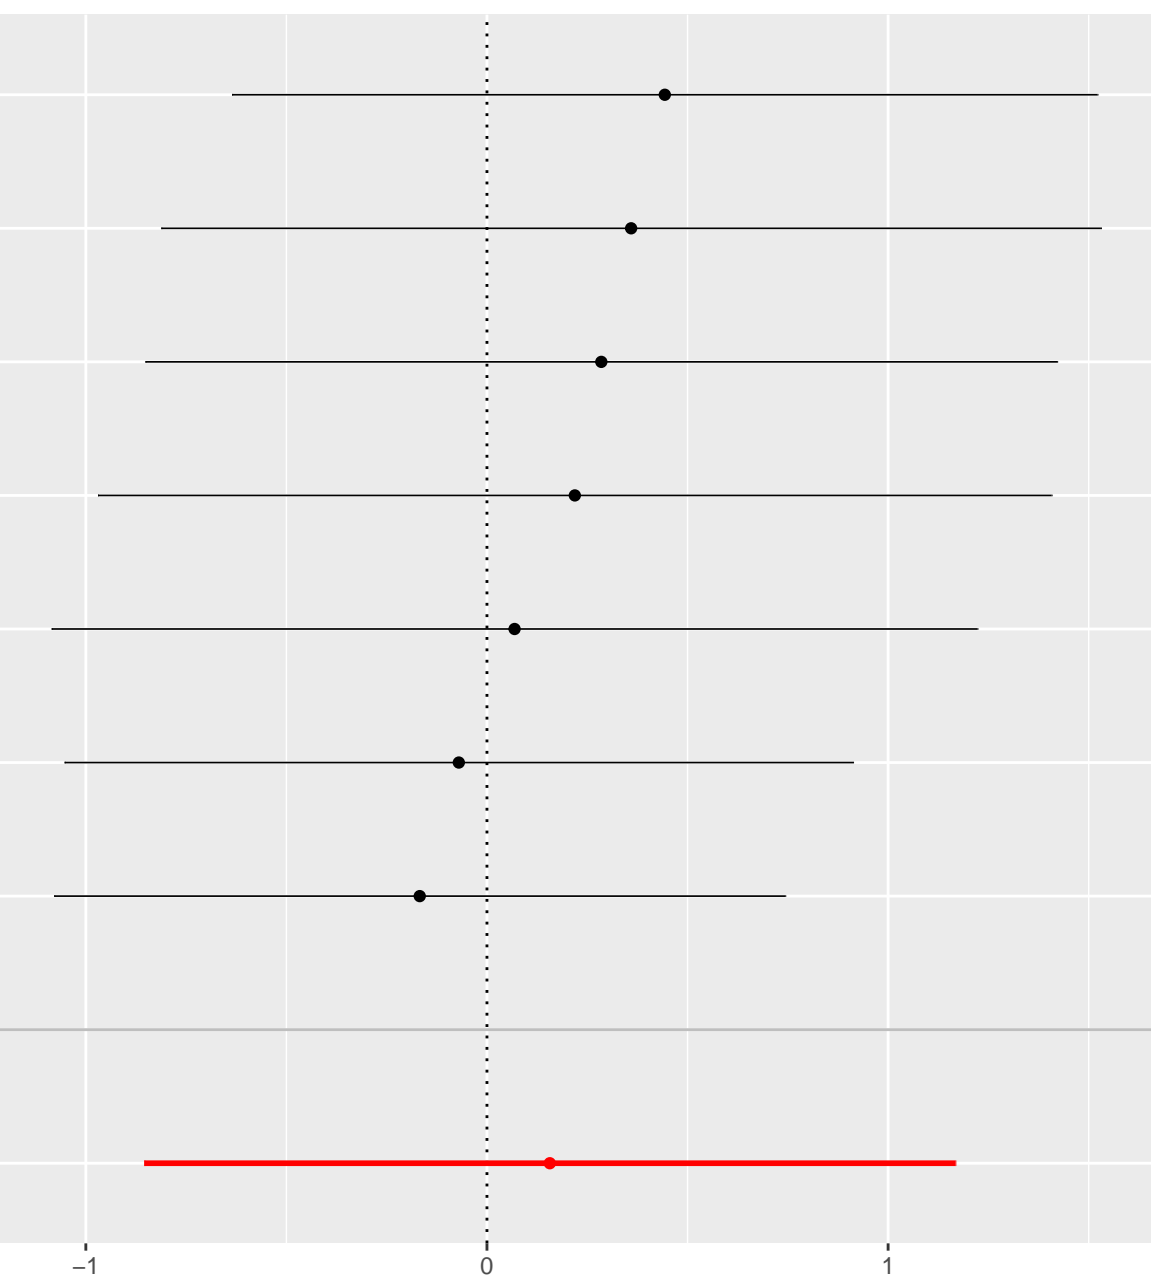

MR leave-one-out sensitivity analysis for 'M33658.metal.pos.txt.gz' on 'JUVEN\_ARTHR.gz'



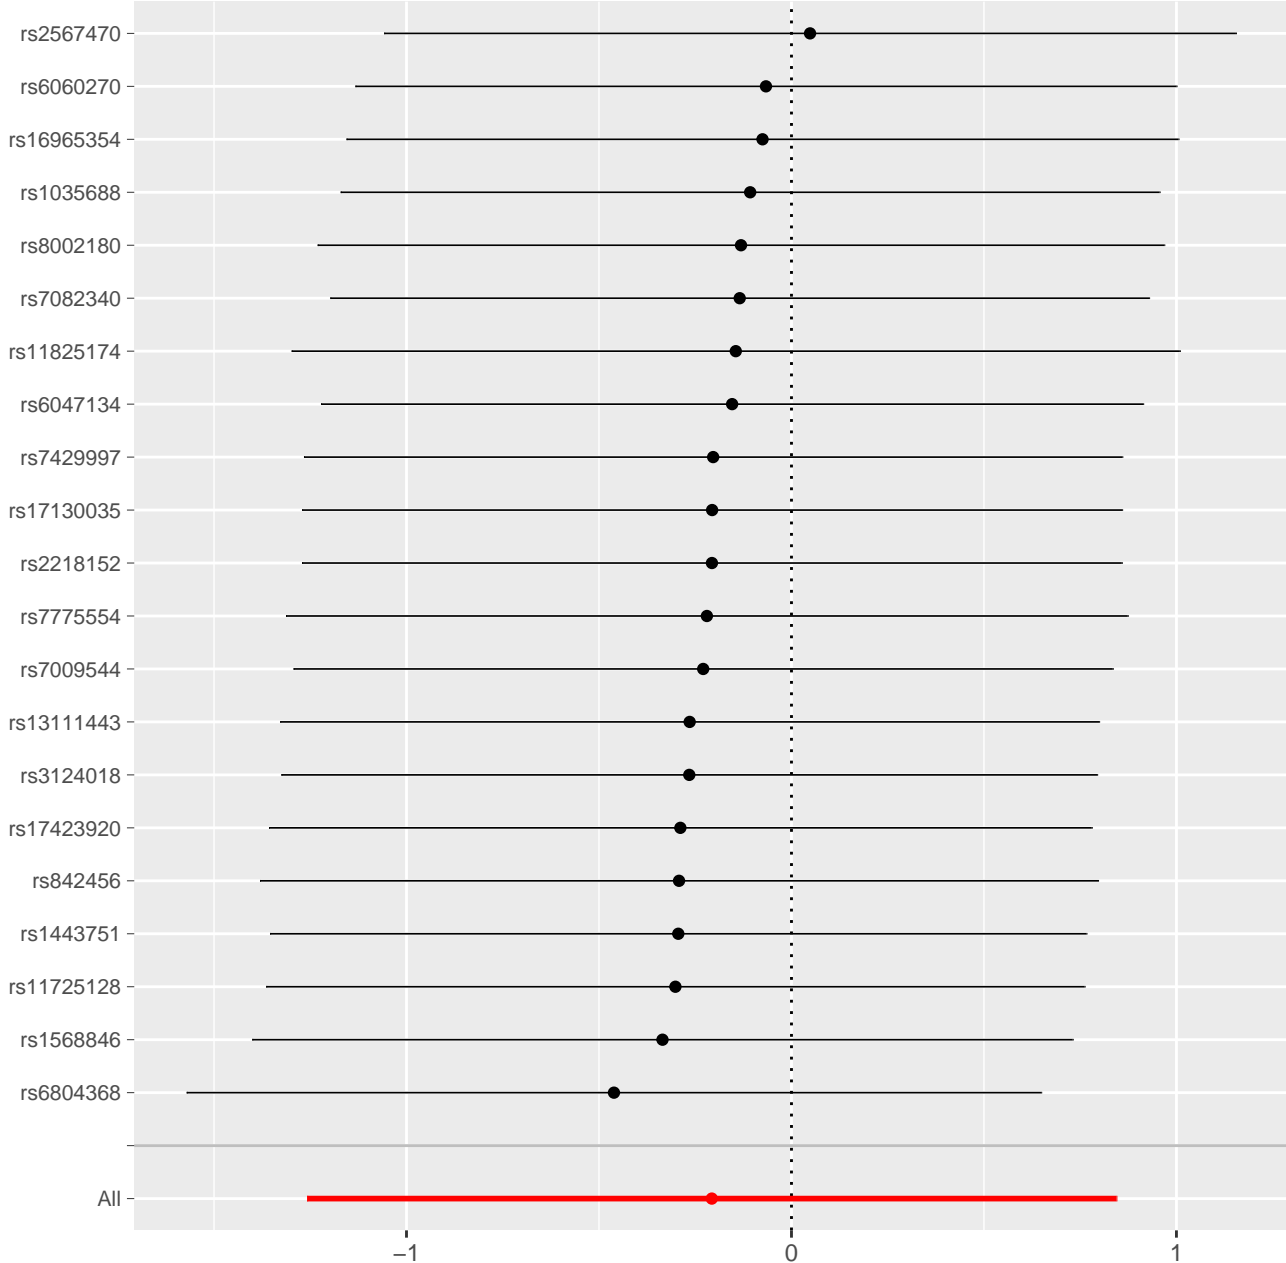

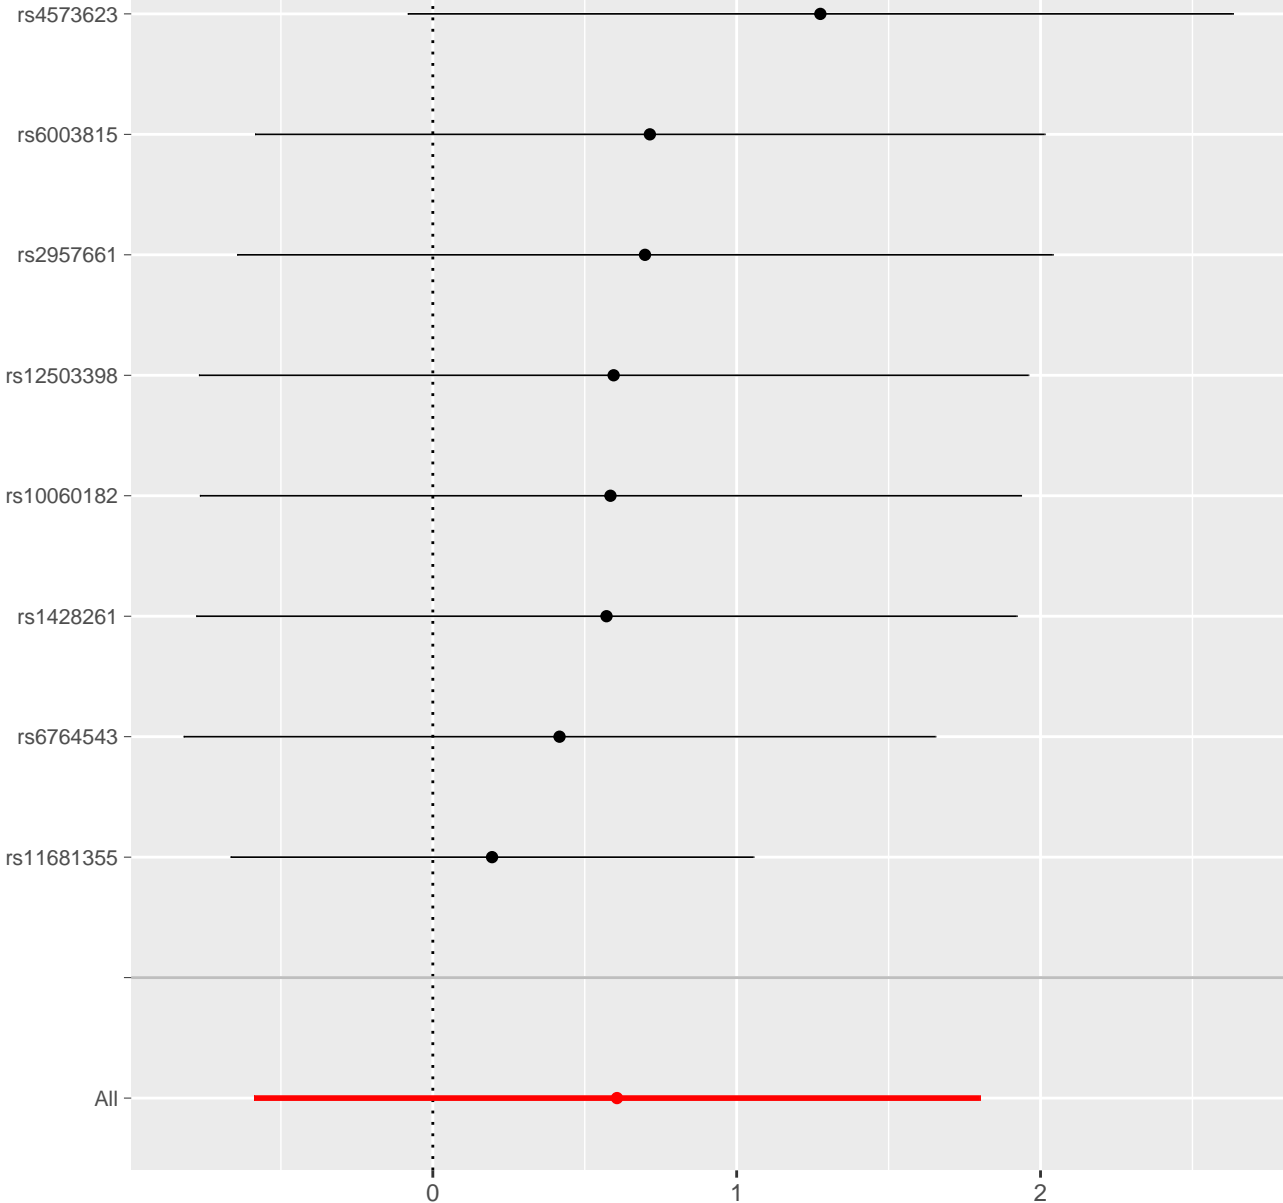

MR leave-one-out sensitivity analysis for 'M33675.metal.pos.txt.gz' on 'JUVEN\_ARTHR.gz'

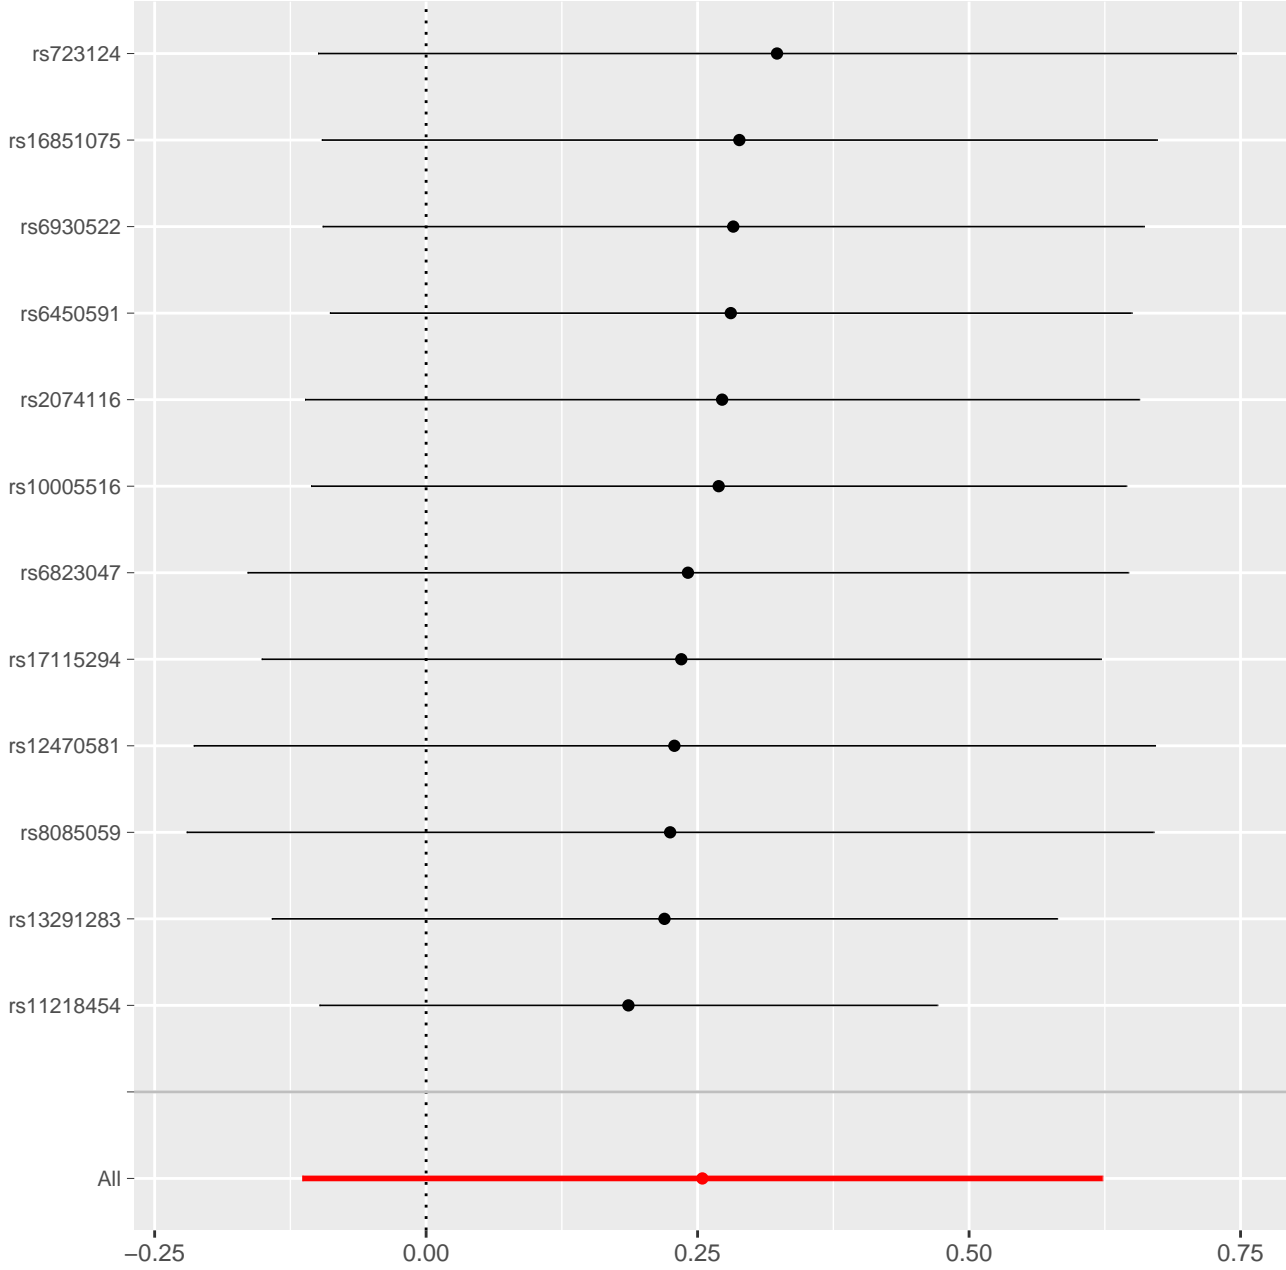

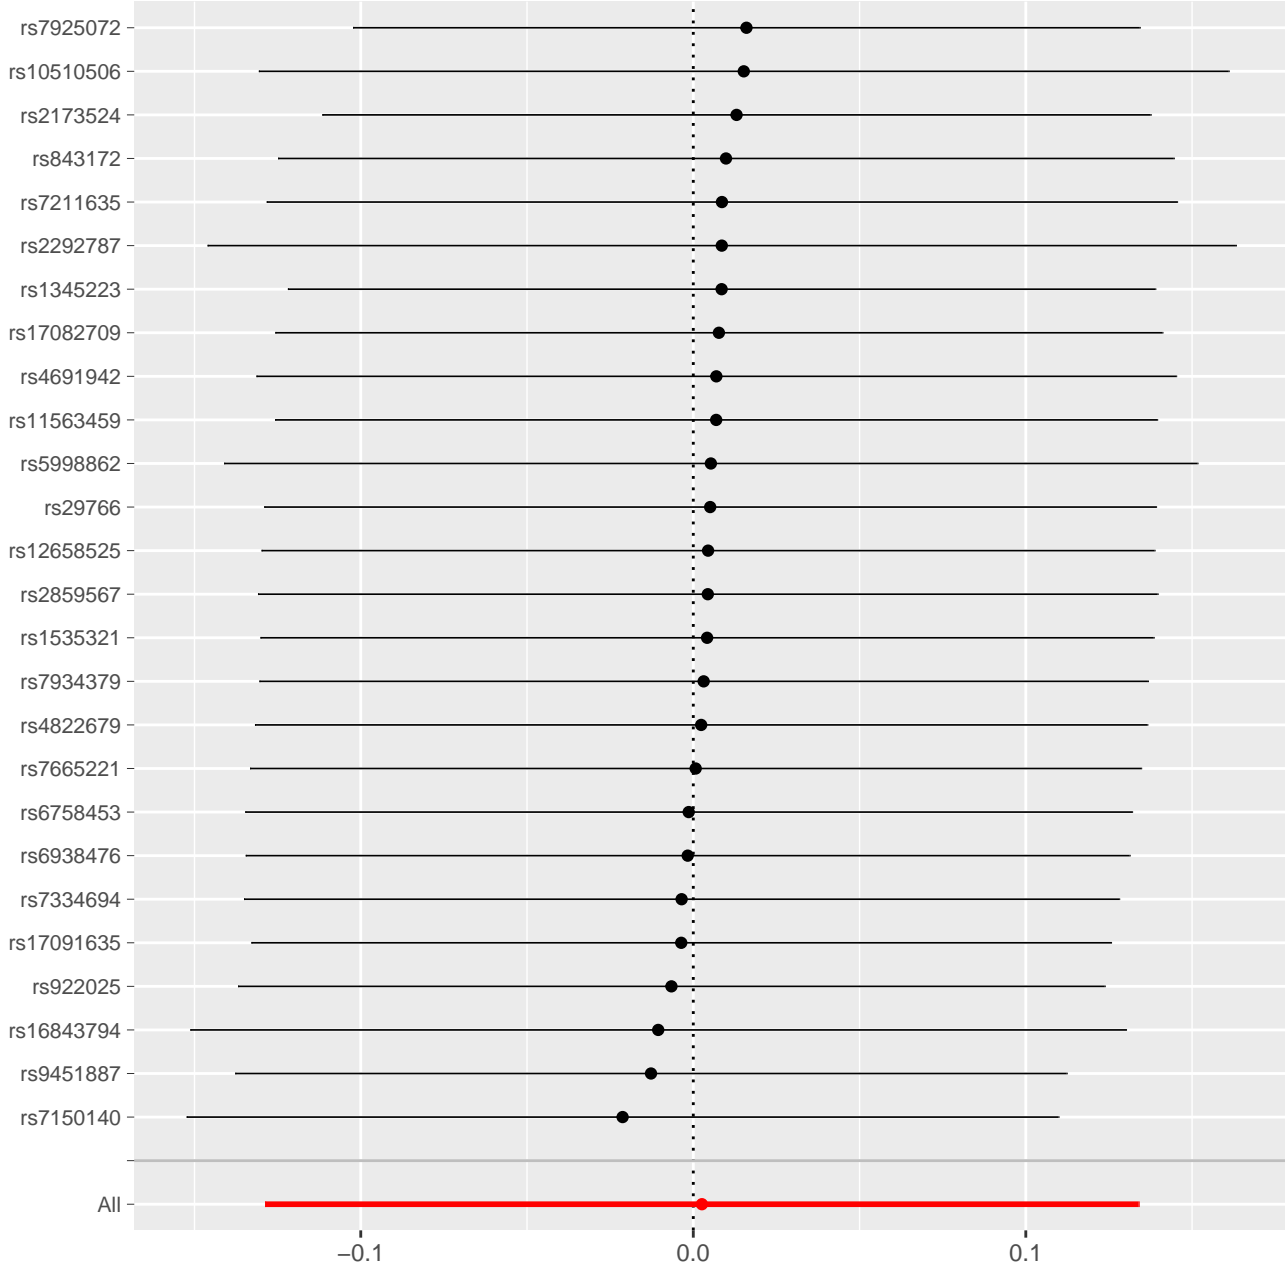

MR leave-one-out sensitivity analysis for 'M33751.metal.pos.txt.gz' on 'JUVEN\_ARTHR.gz'

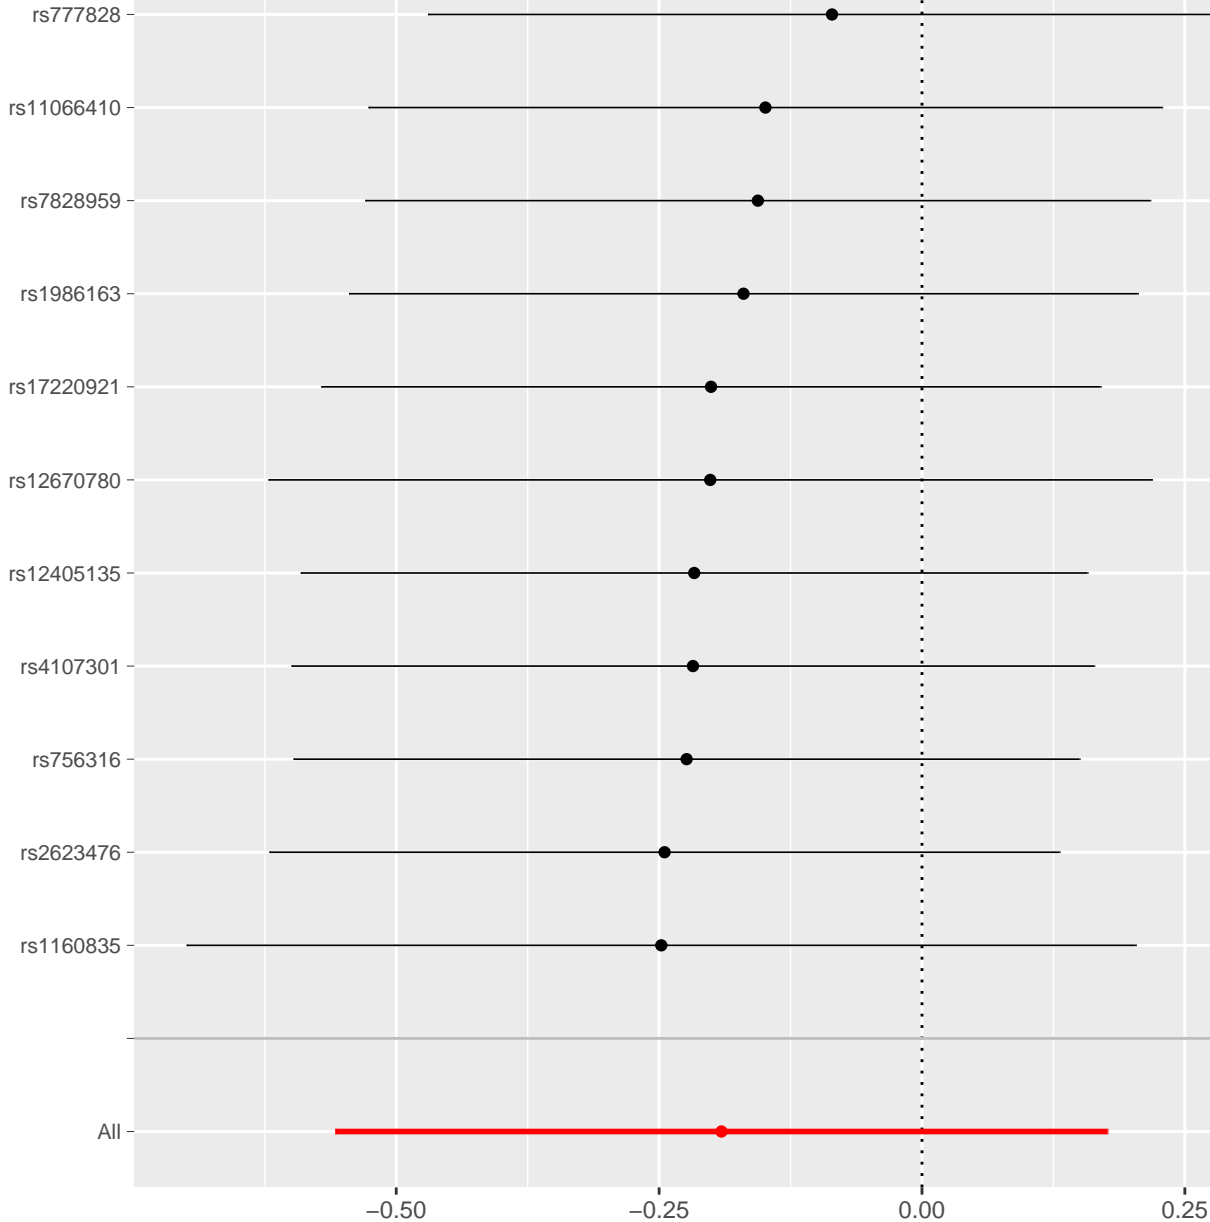

MR leave-one-out sensitivity analysis for 'M33782.metal.pos.txt.gz' on 'JUVEN\_ARTHR.gz'

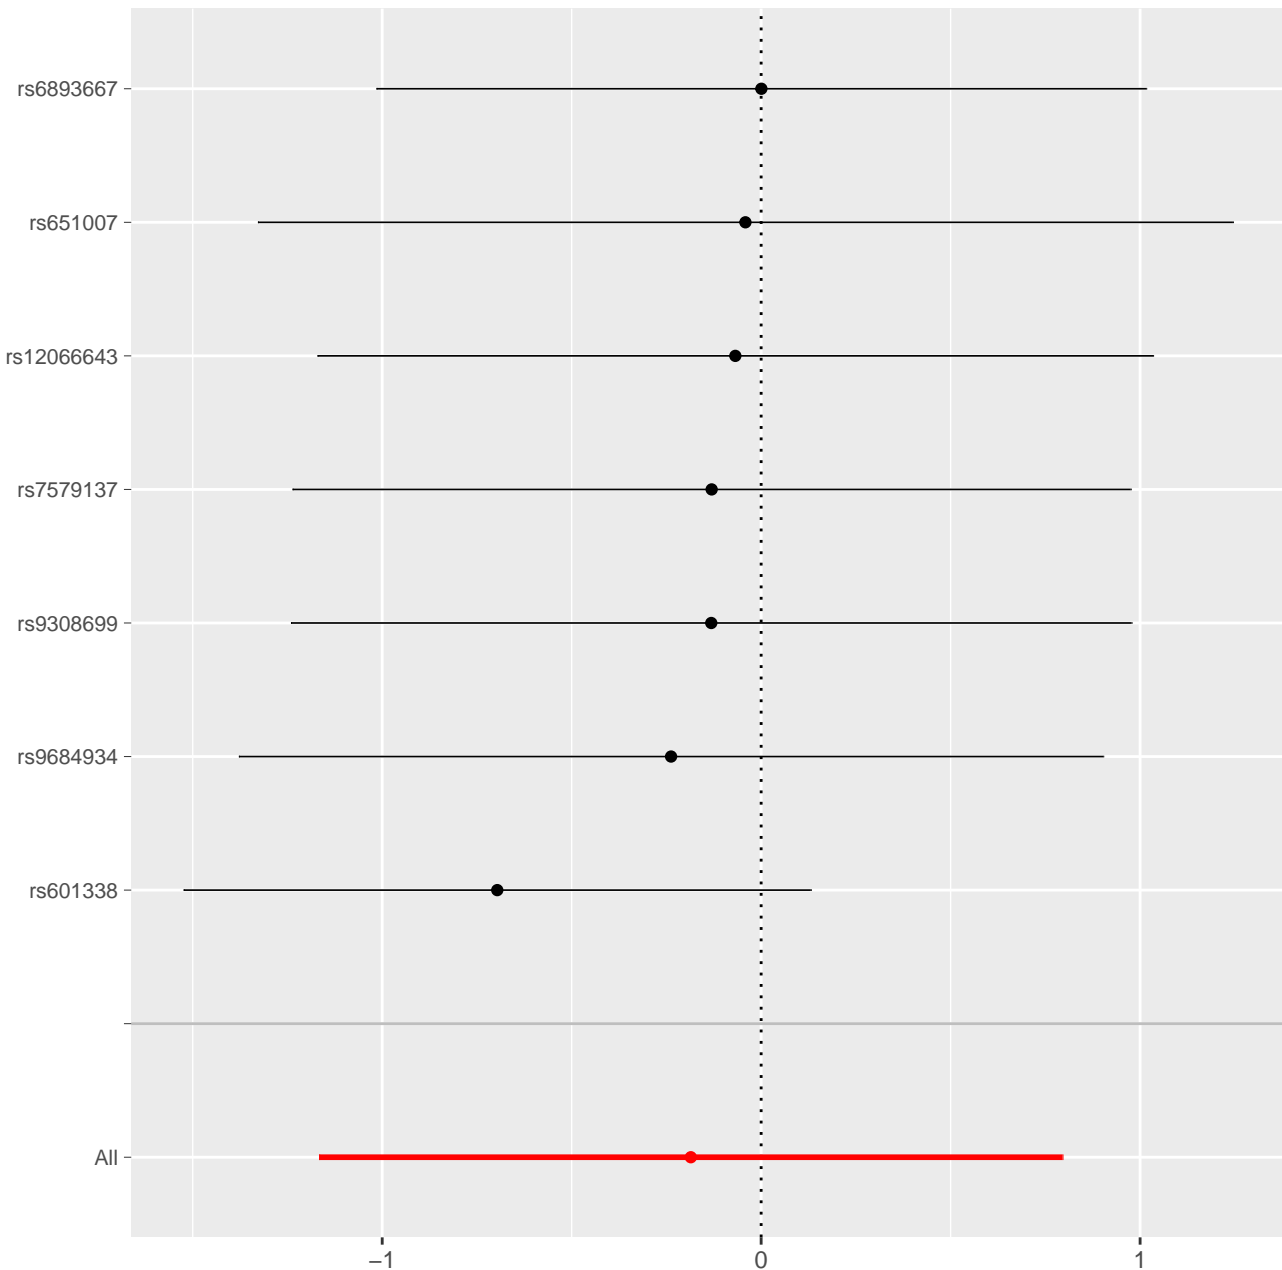

MR leave-one-out sensitivity analysis for 'M33801.metal.pos.txt.gz' on 'JUVEN\_ARTHR.gz'

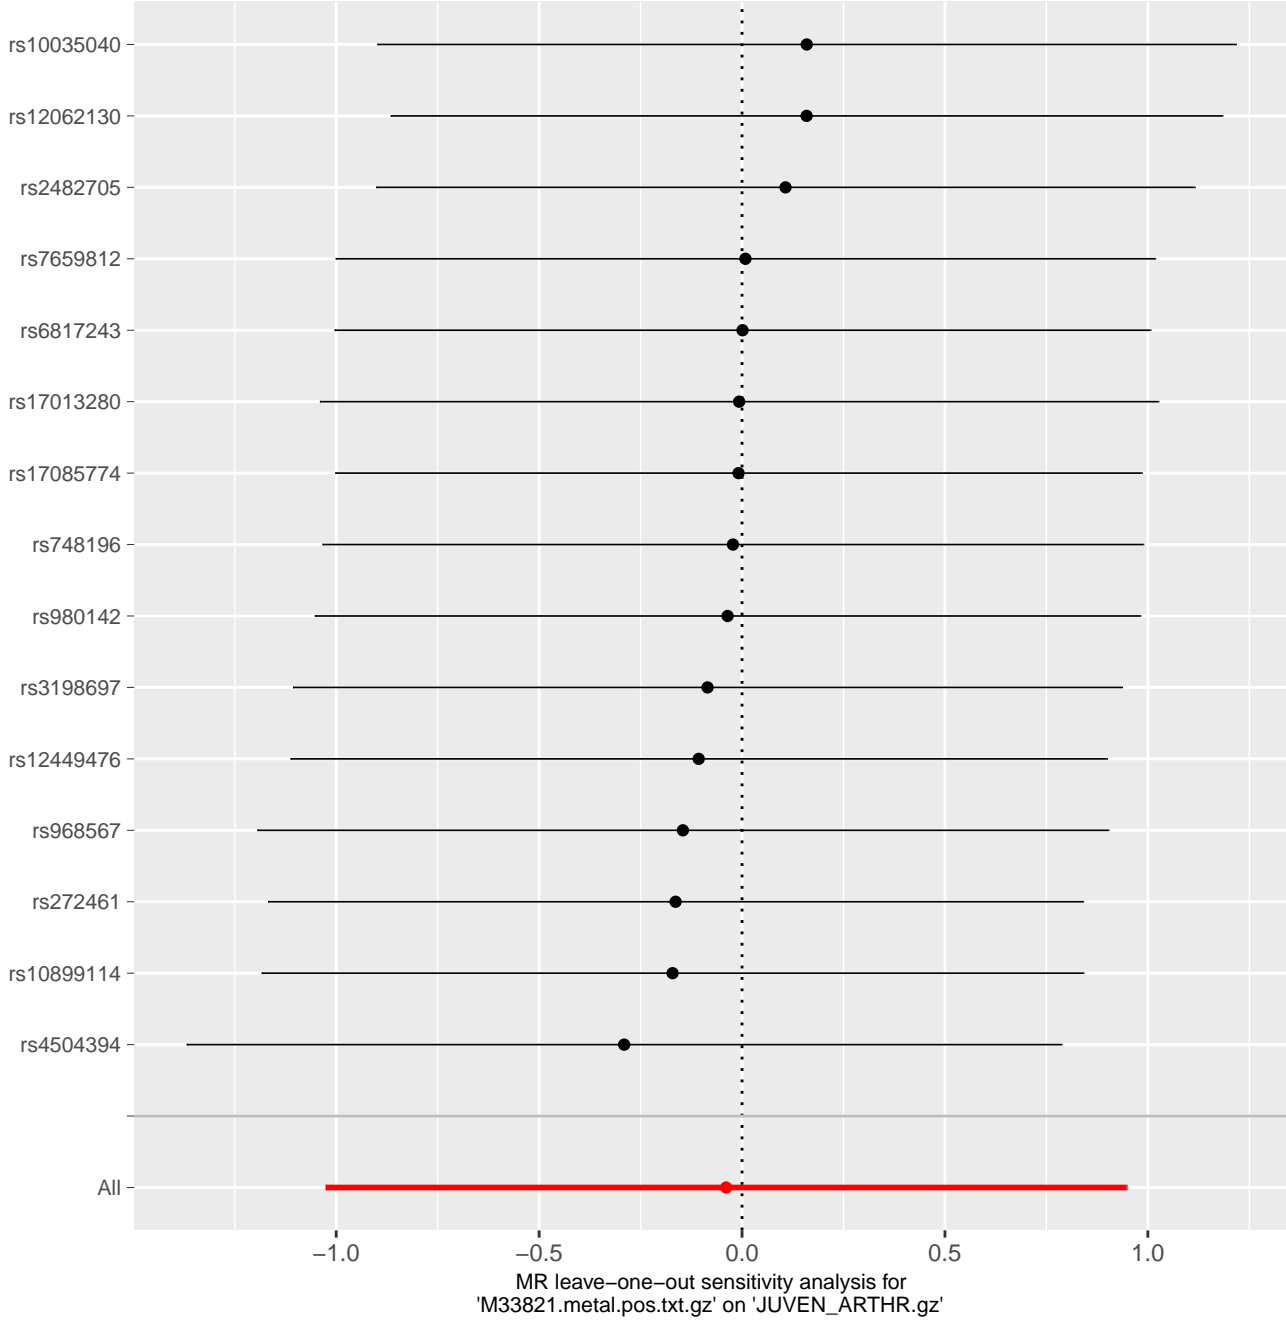

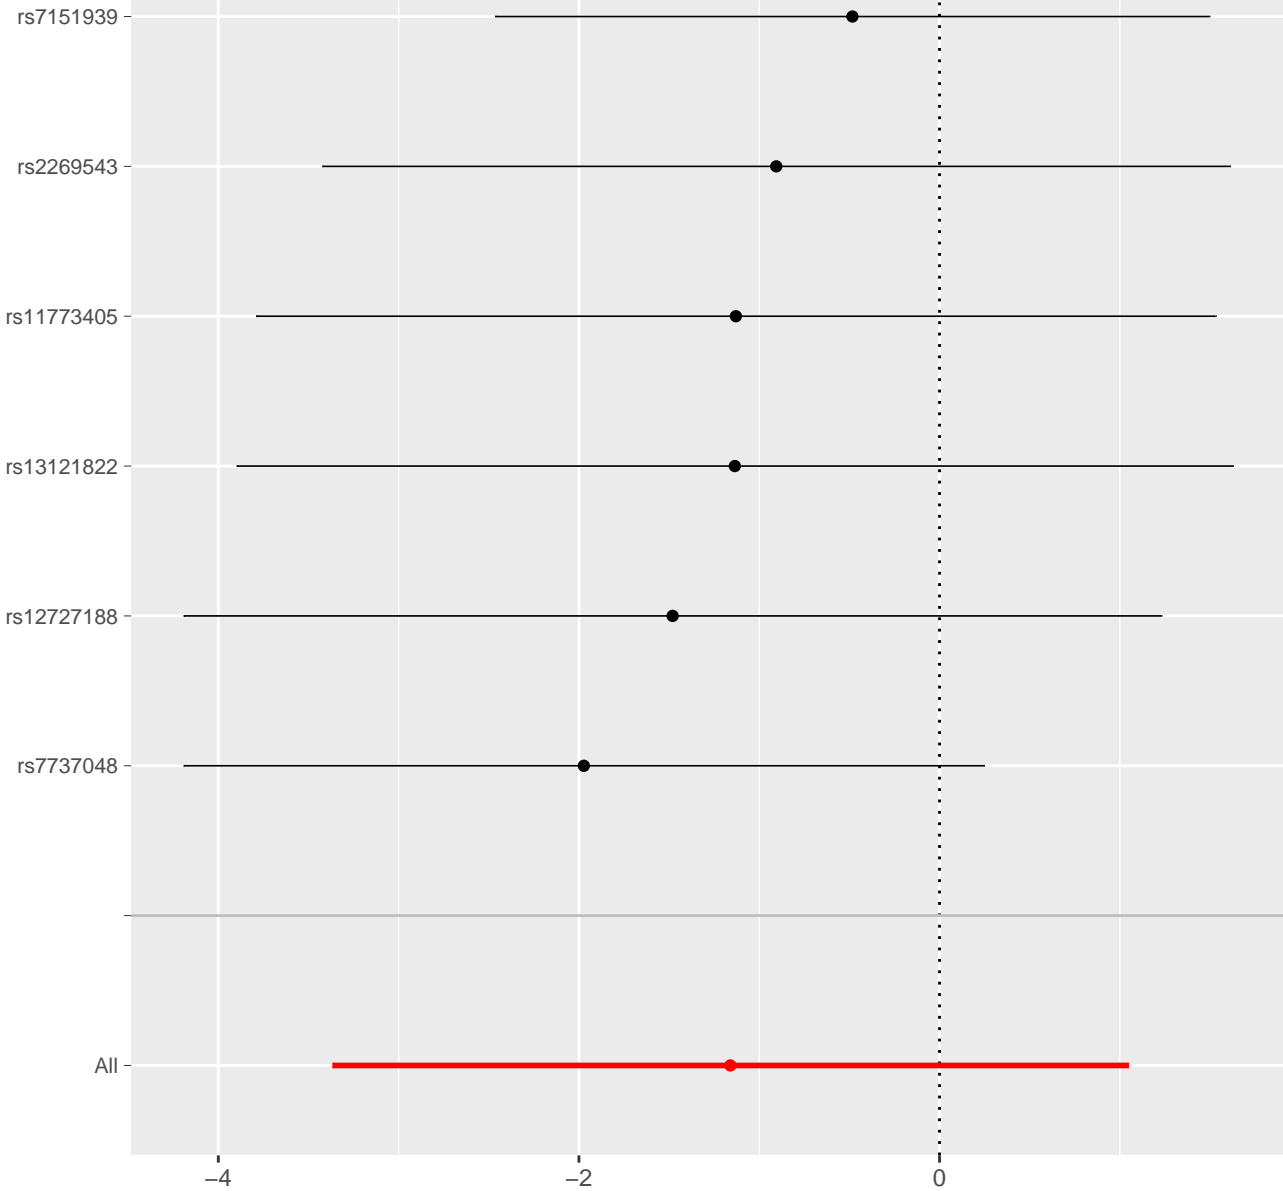

MR leave-one-out sensitivity analysis for 'M33822.metal.pos.txt.gz' on 'JUVEN\_ARTHR.gz'



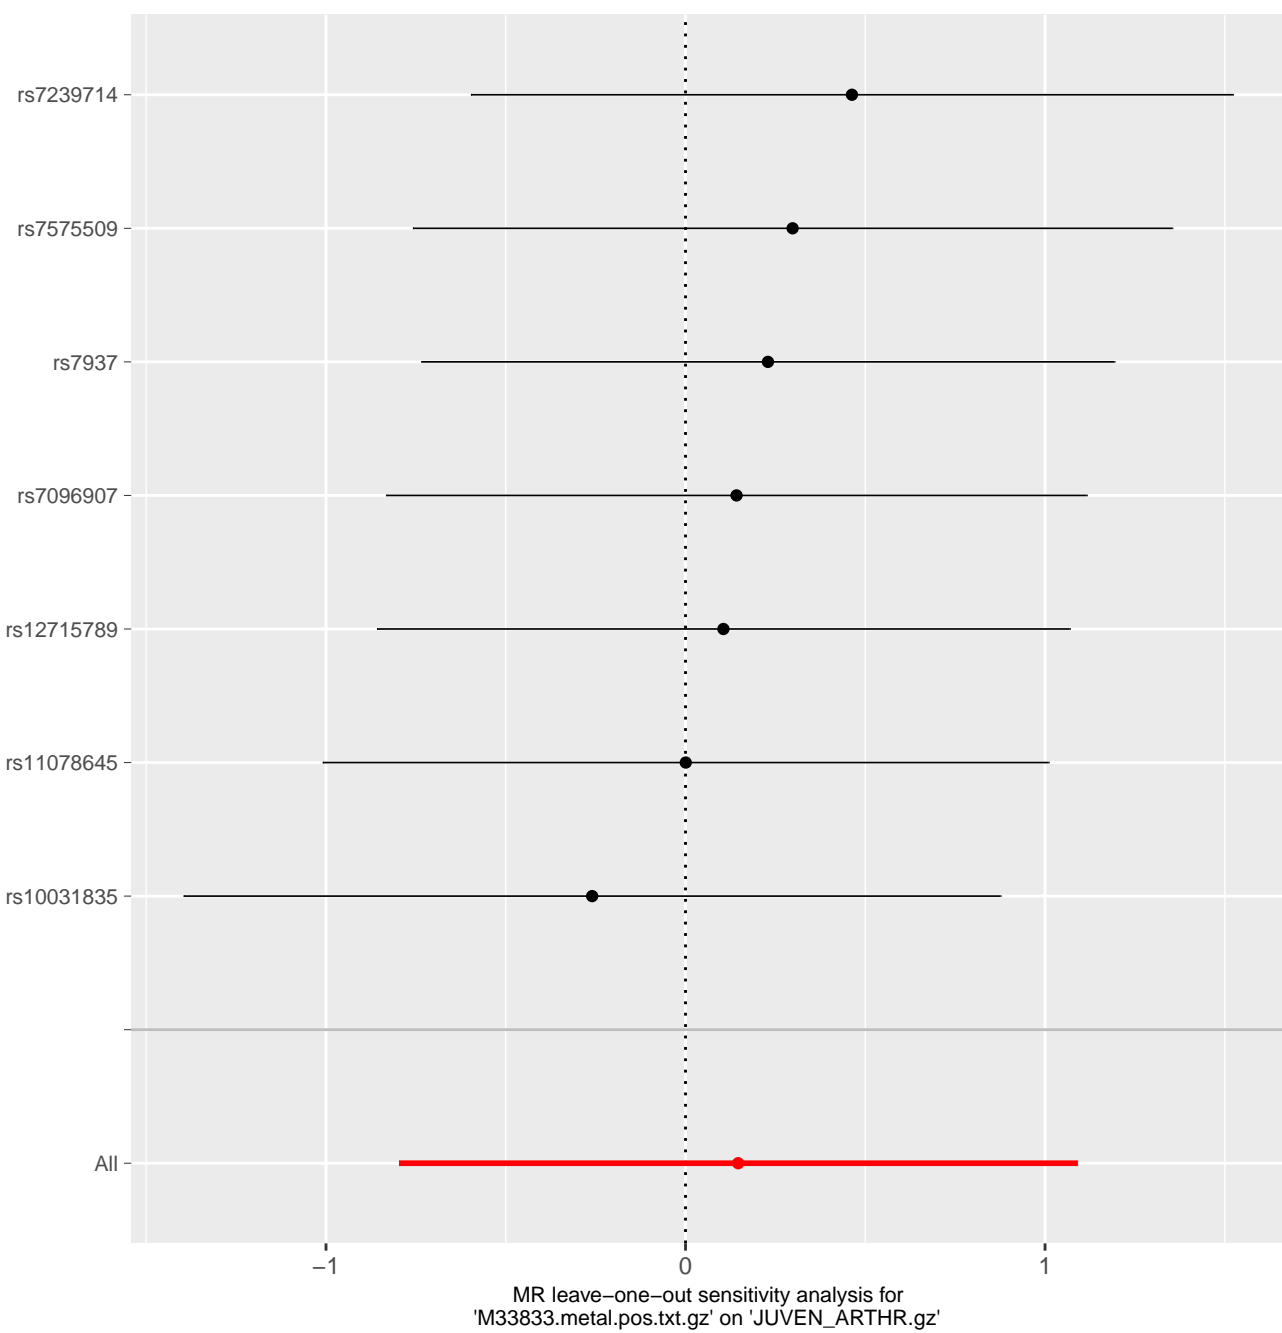

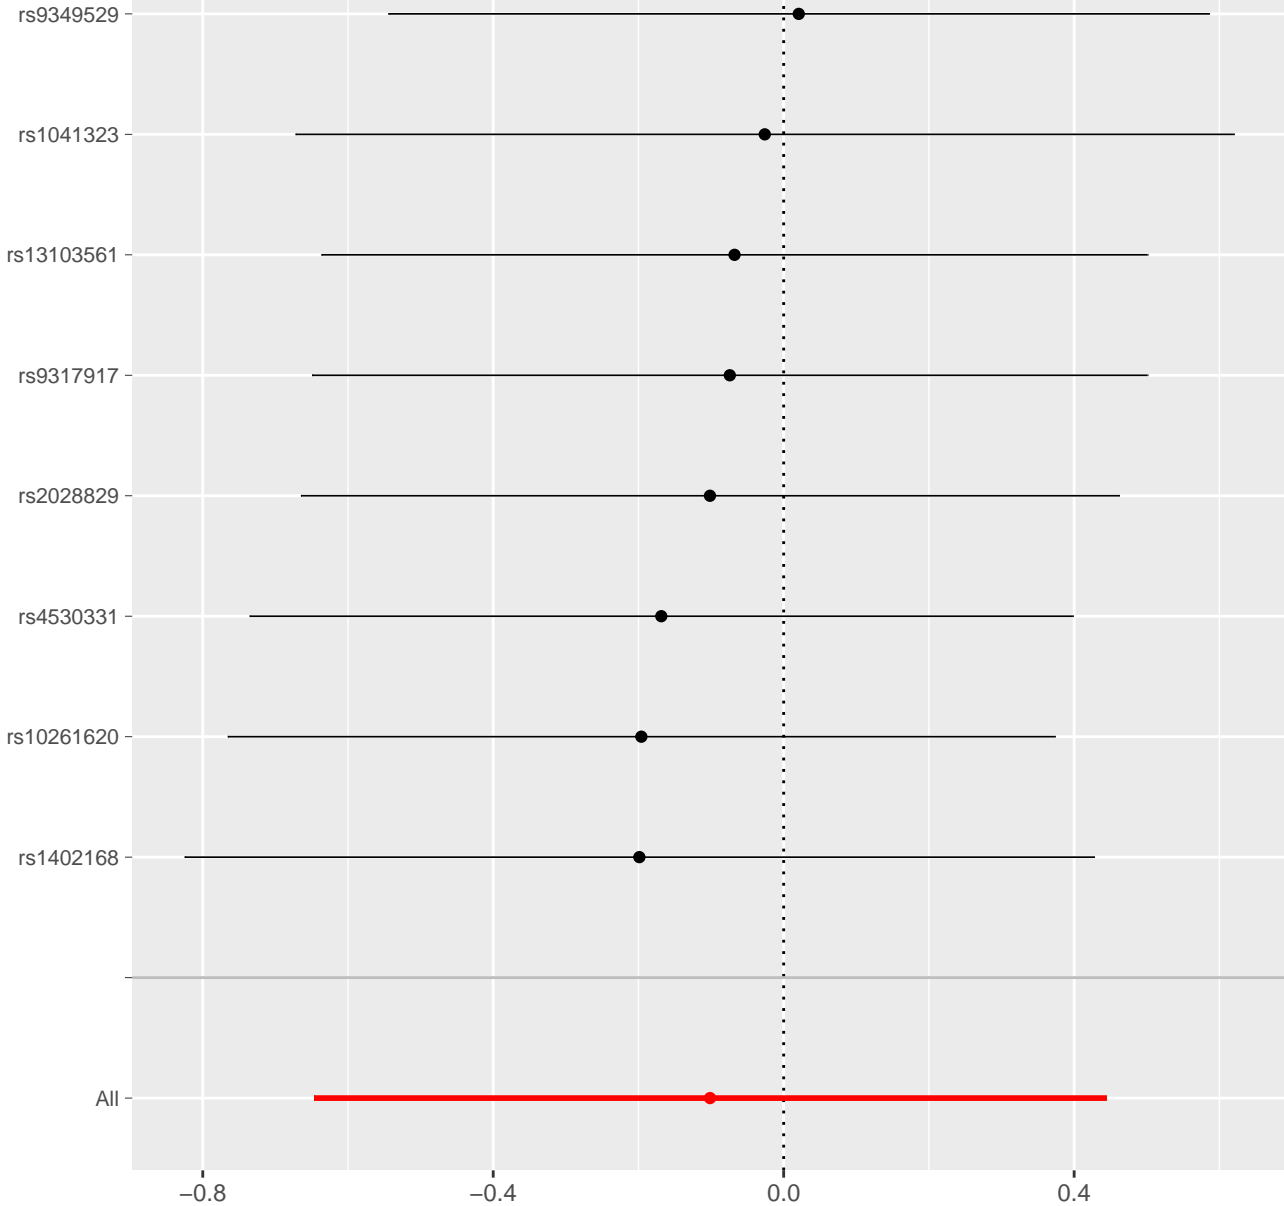

MR leave-one-out sensitivity analysis for 'M33835.metal.pos.txt.gz' on 'JUVEN\_ARTHR.gz'

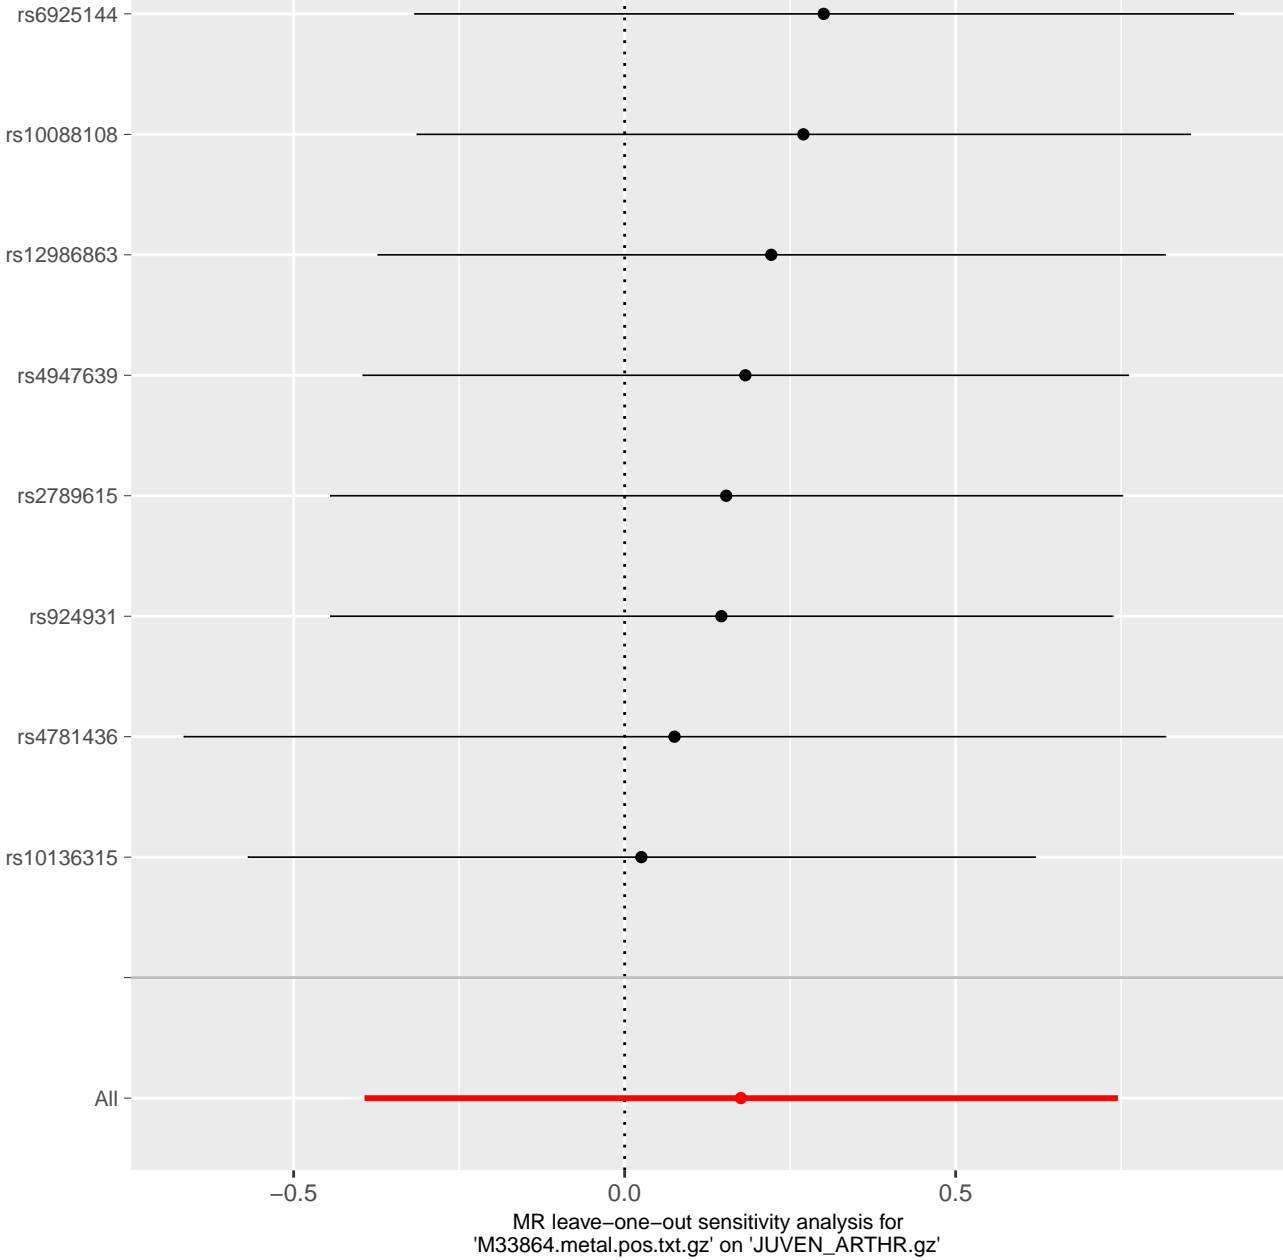

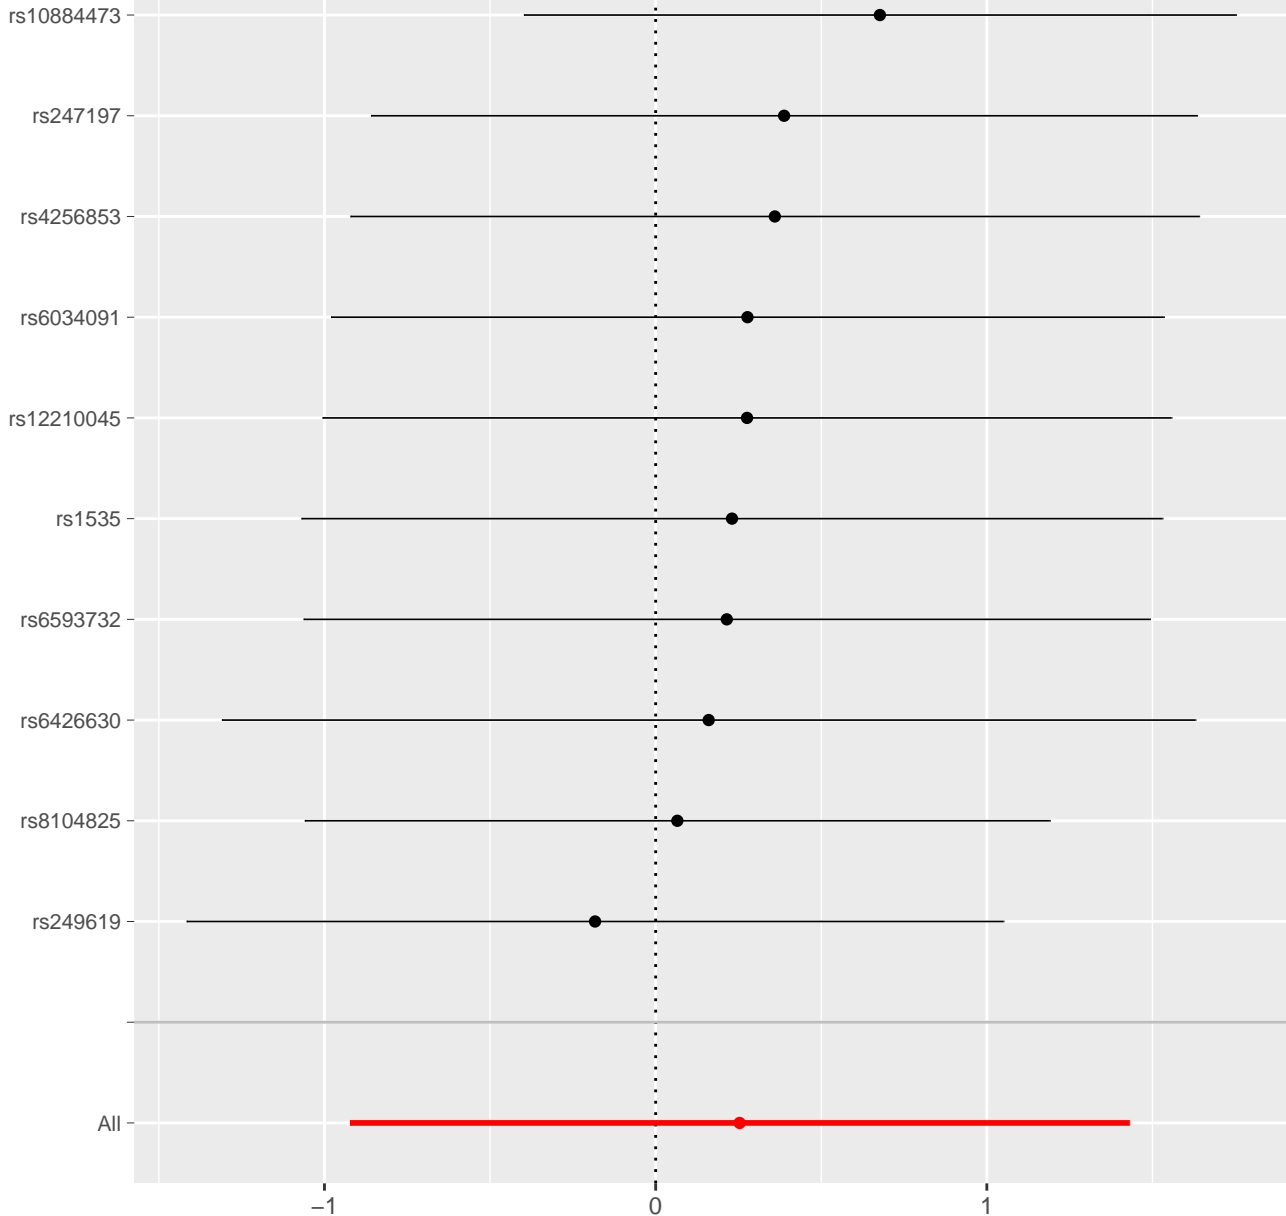

MR leave-one-out sensitivity analysis for 'M33871.metal.pos.txt.gz' on 'JUVEN\_ARTHR.gz'

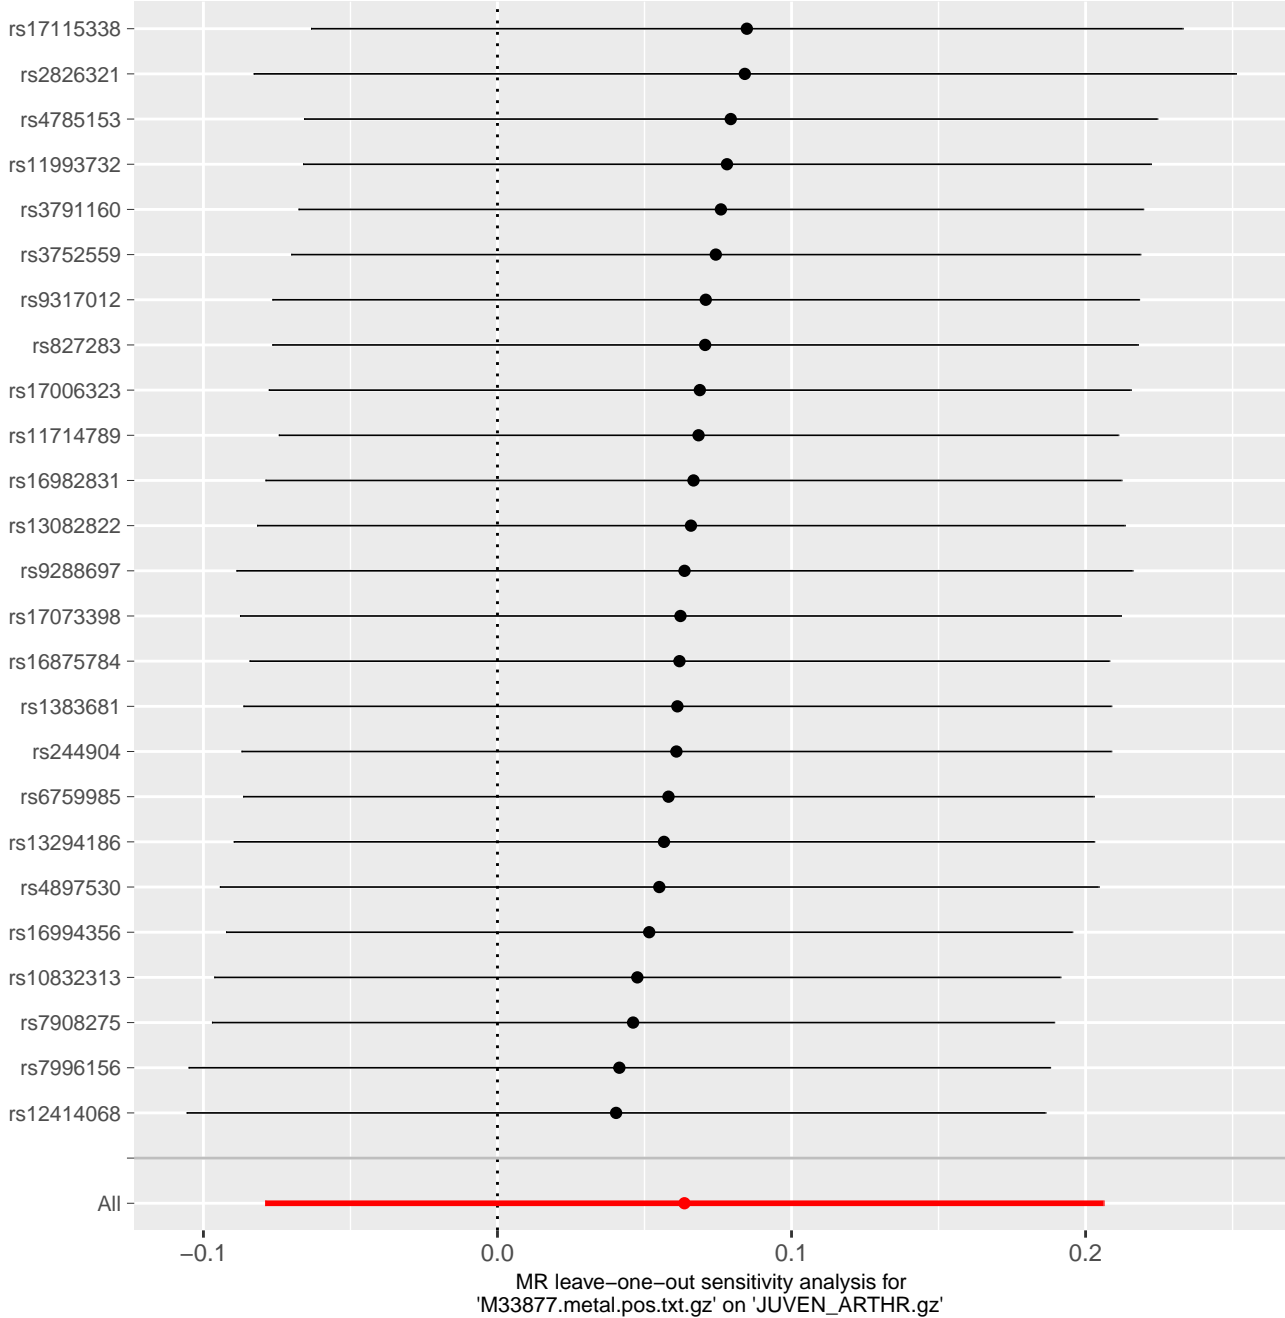

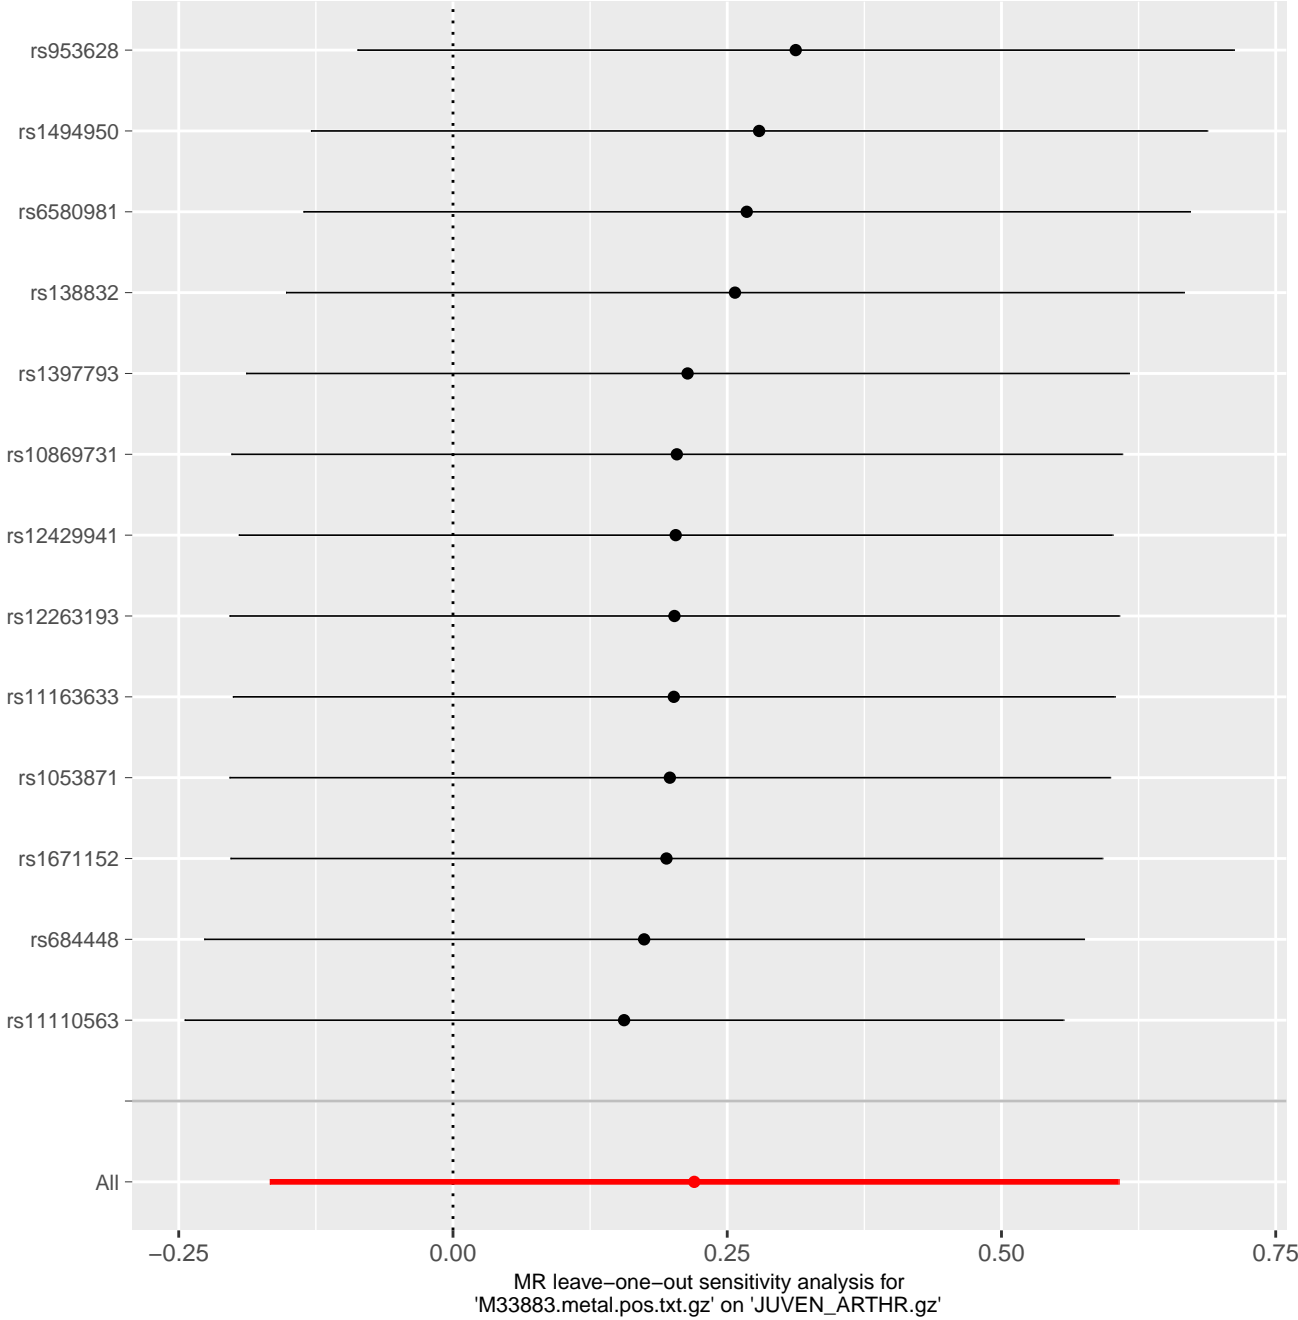

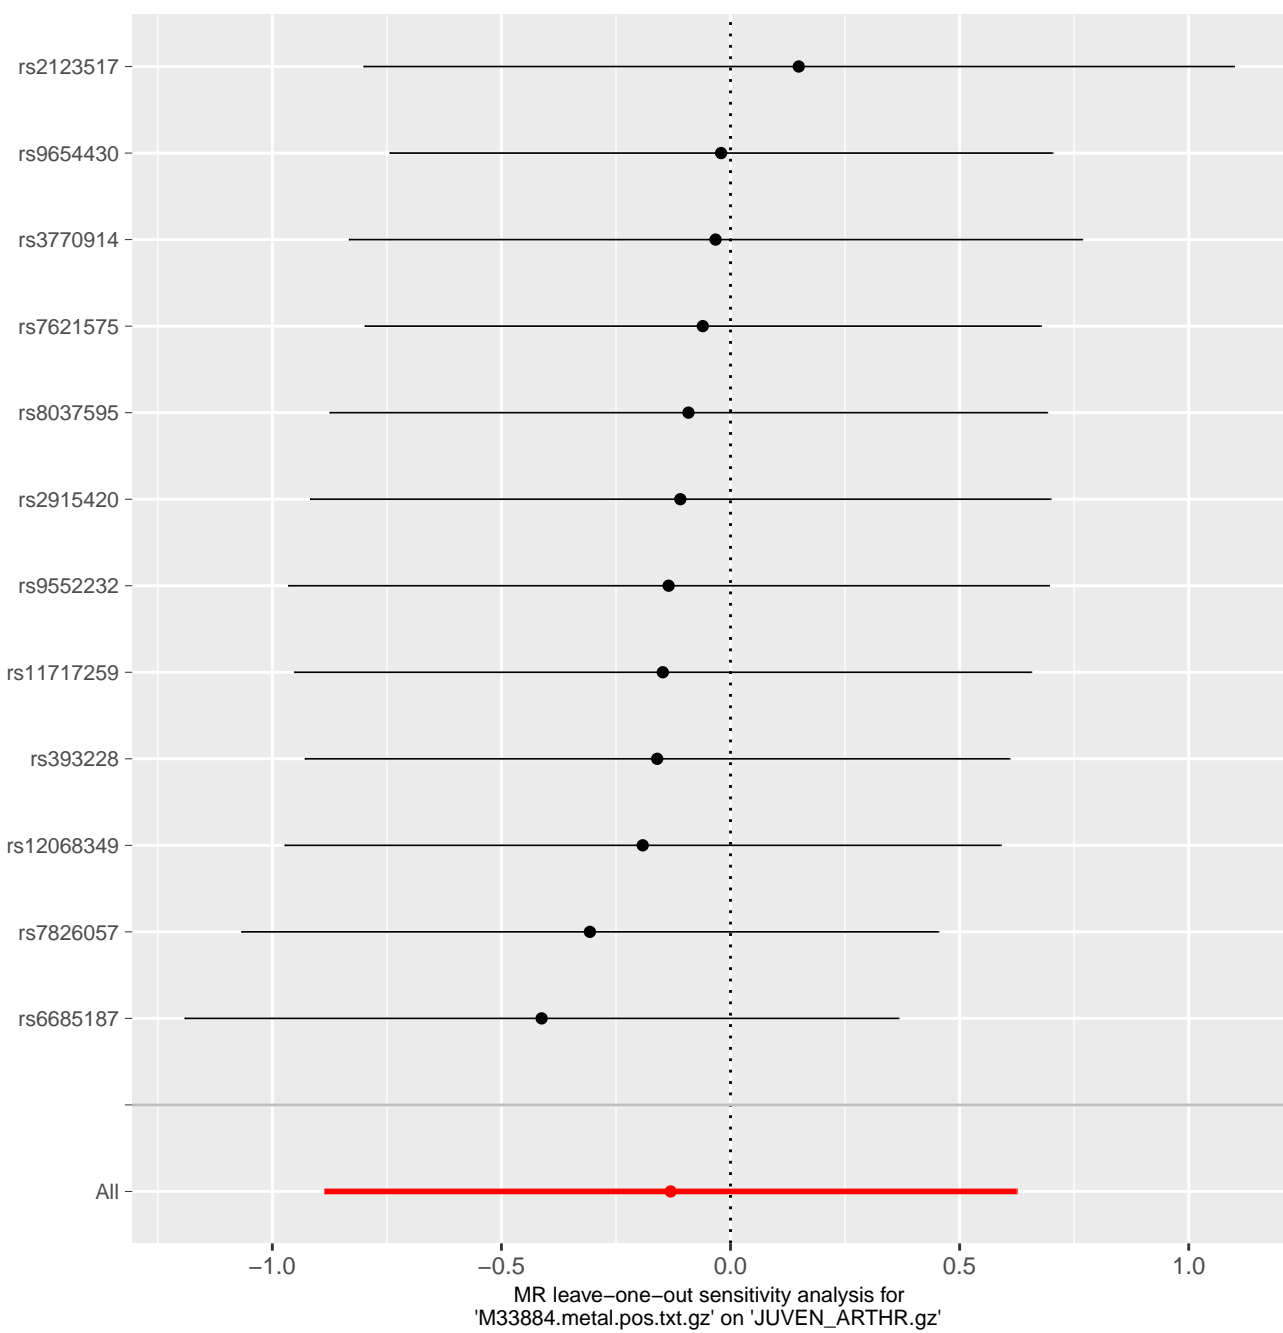

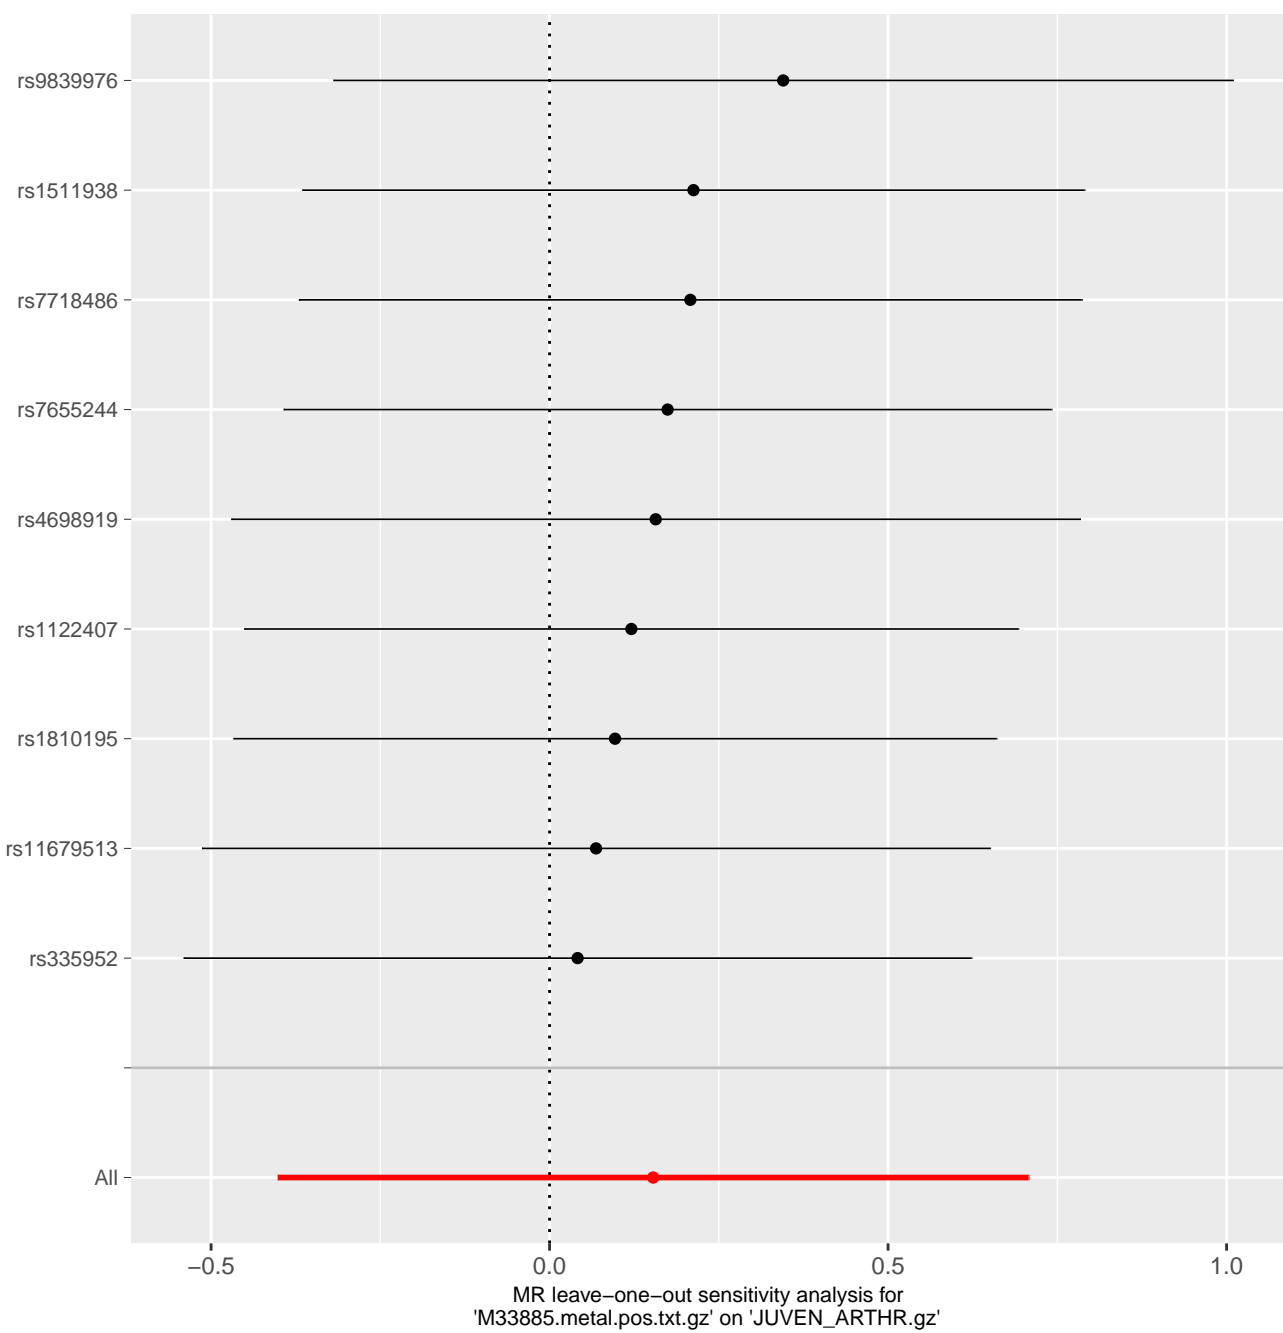



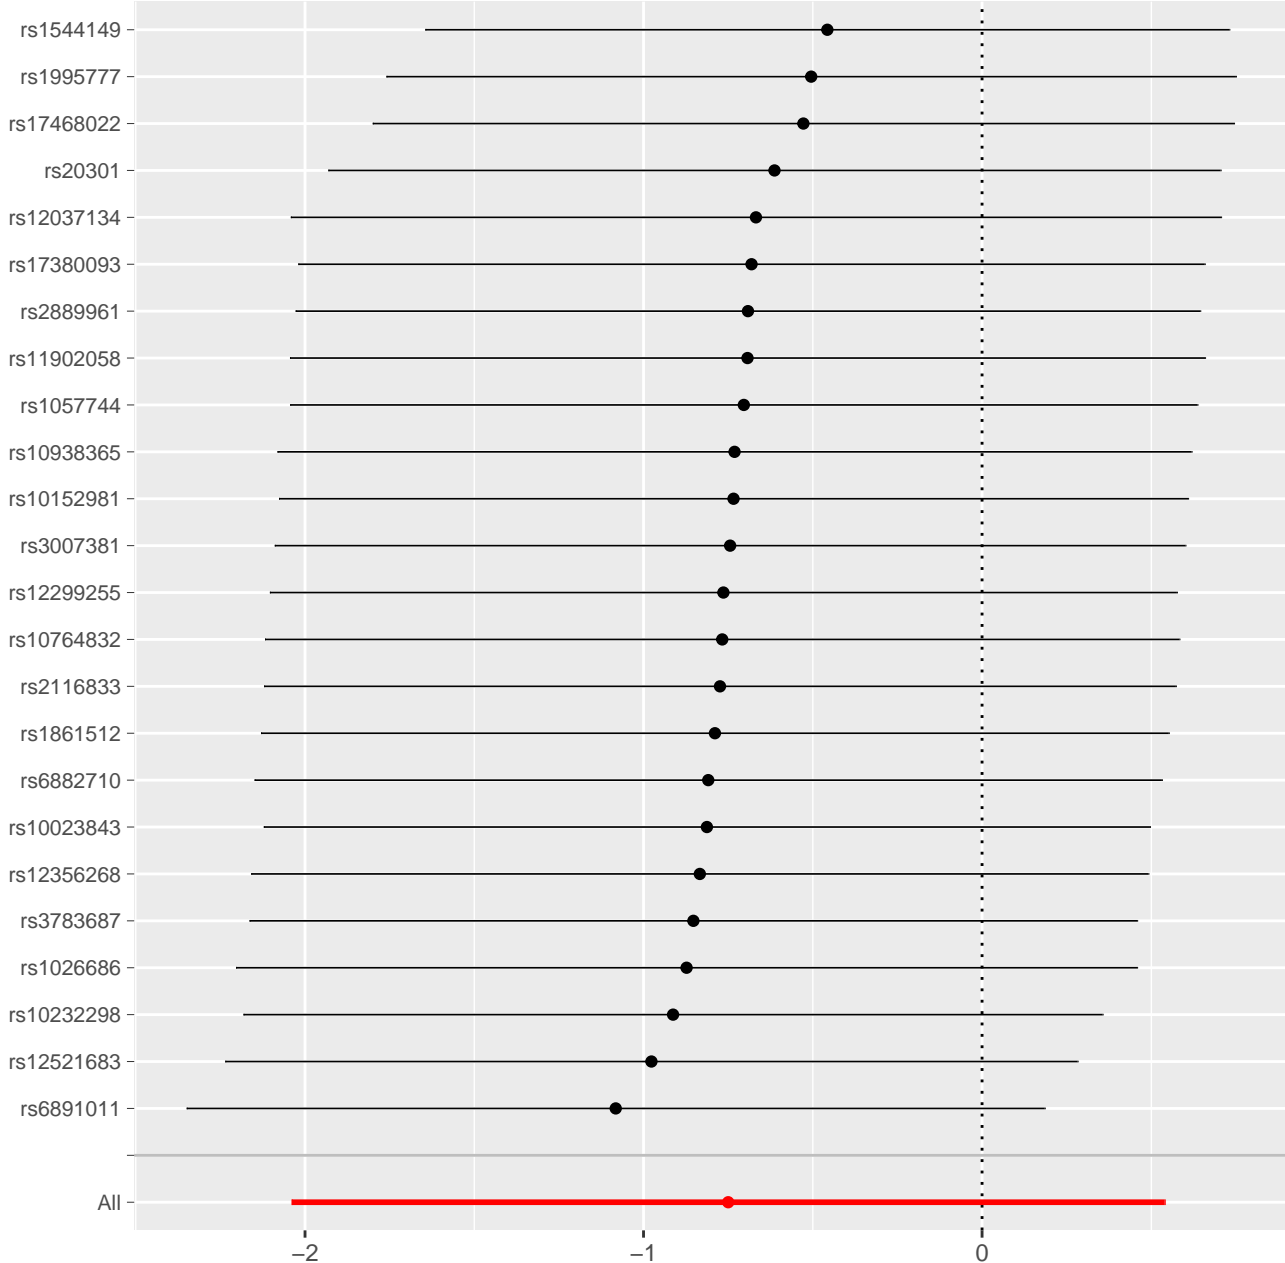

MR leave-one-out sensitivity analysis for 'M33892.metal.pos.txt.gz' on 'JUVEN\_ARTHR.gz'

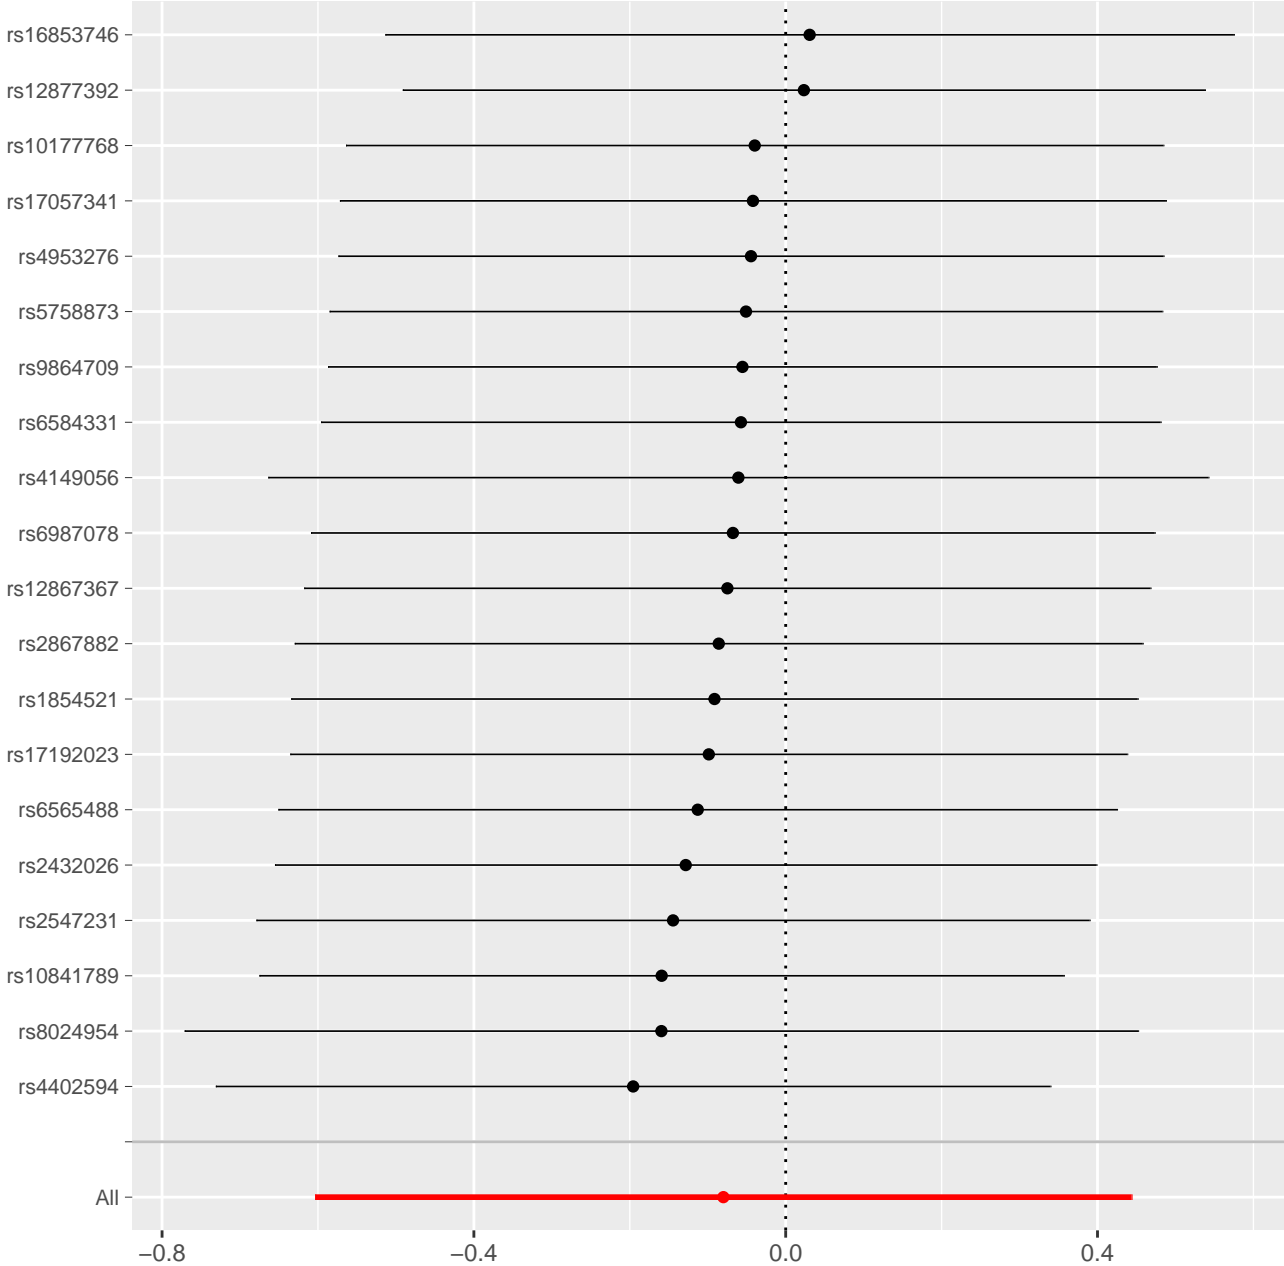

MR leave-one-out sensitivity analysis for 'M33901.metal.pos.txt.gz' on 'JUVEN\_ARTHR.gz'

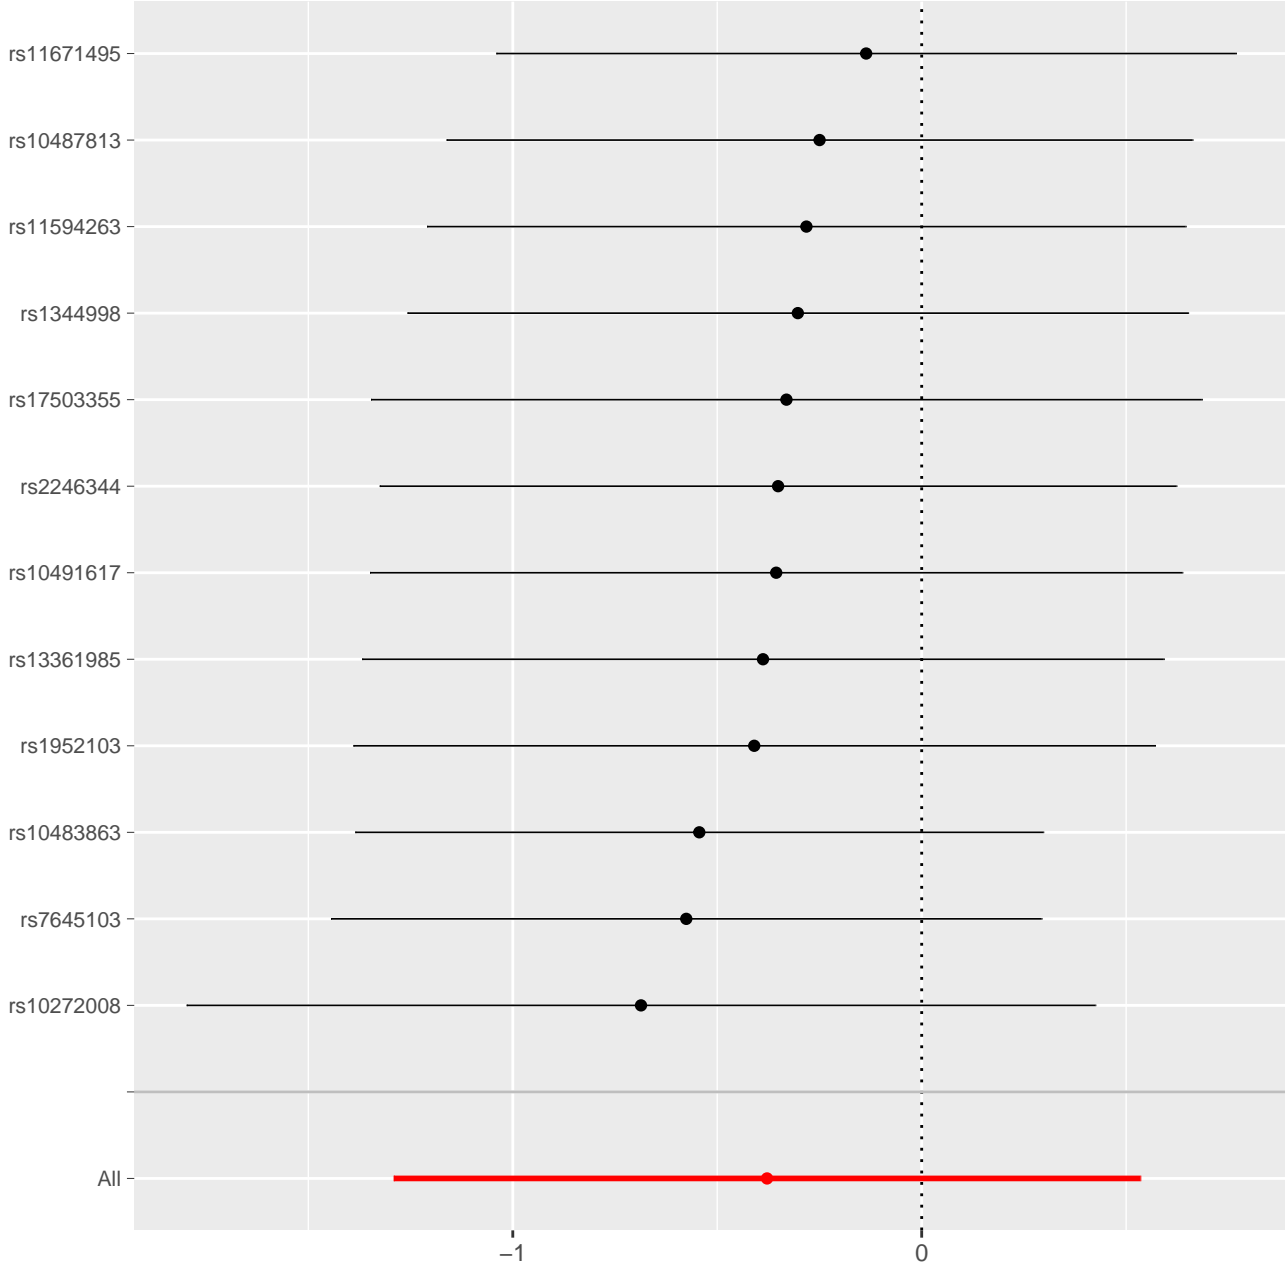

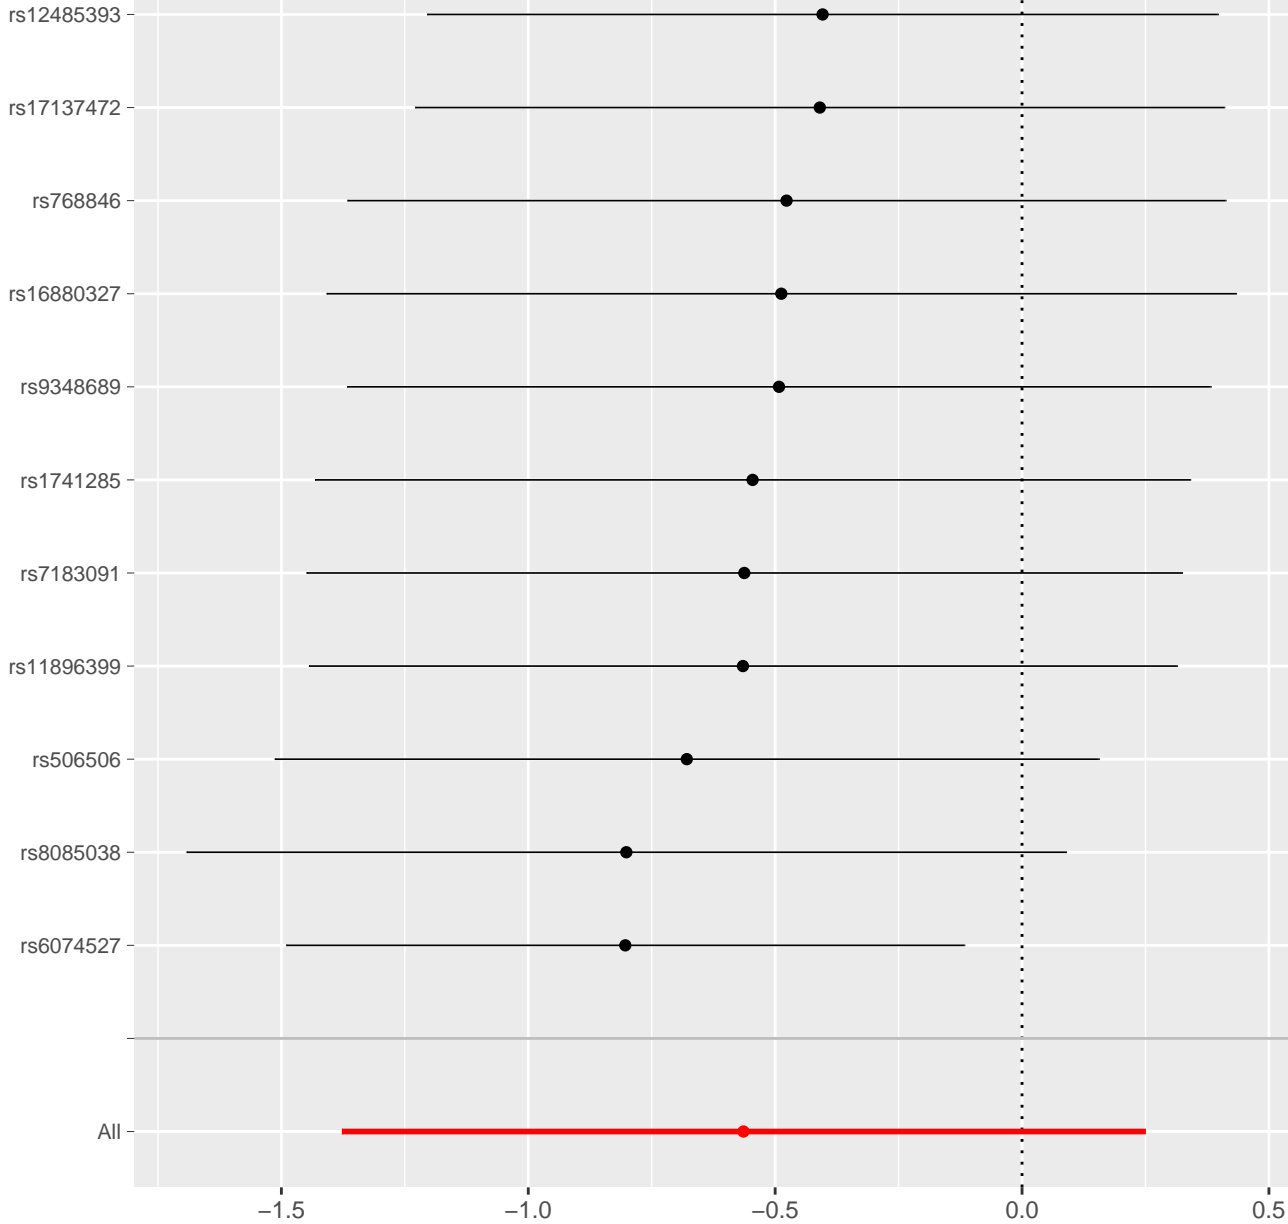

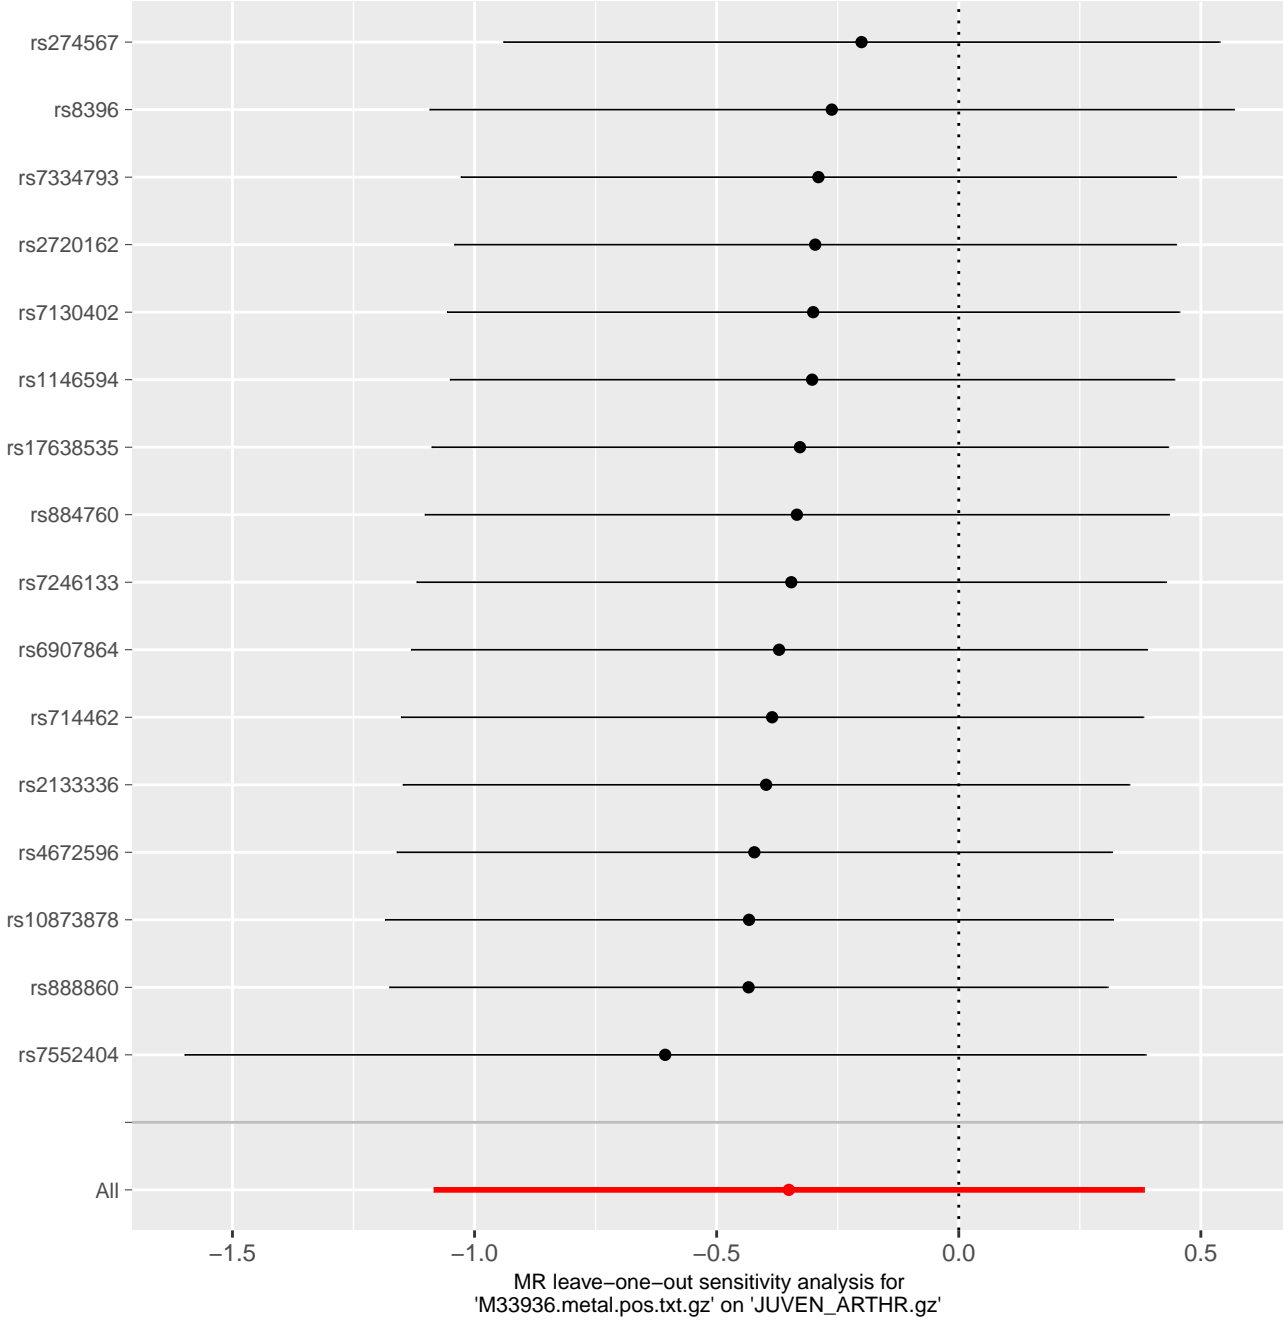

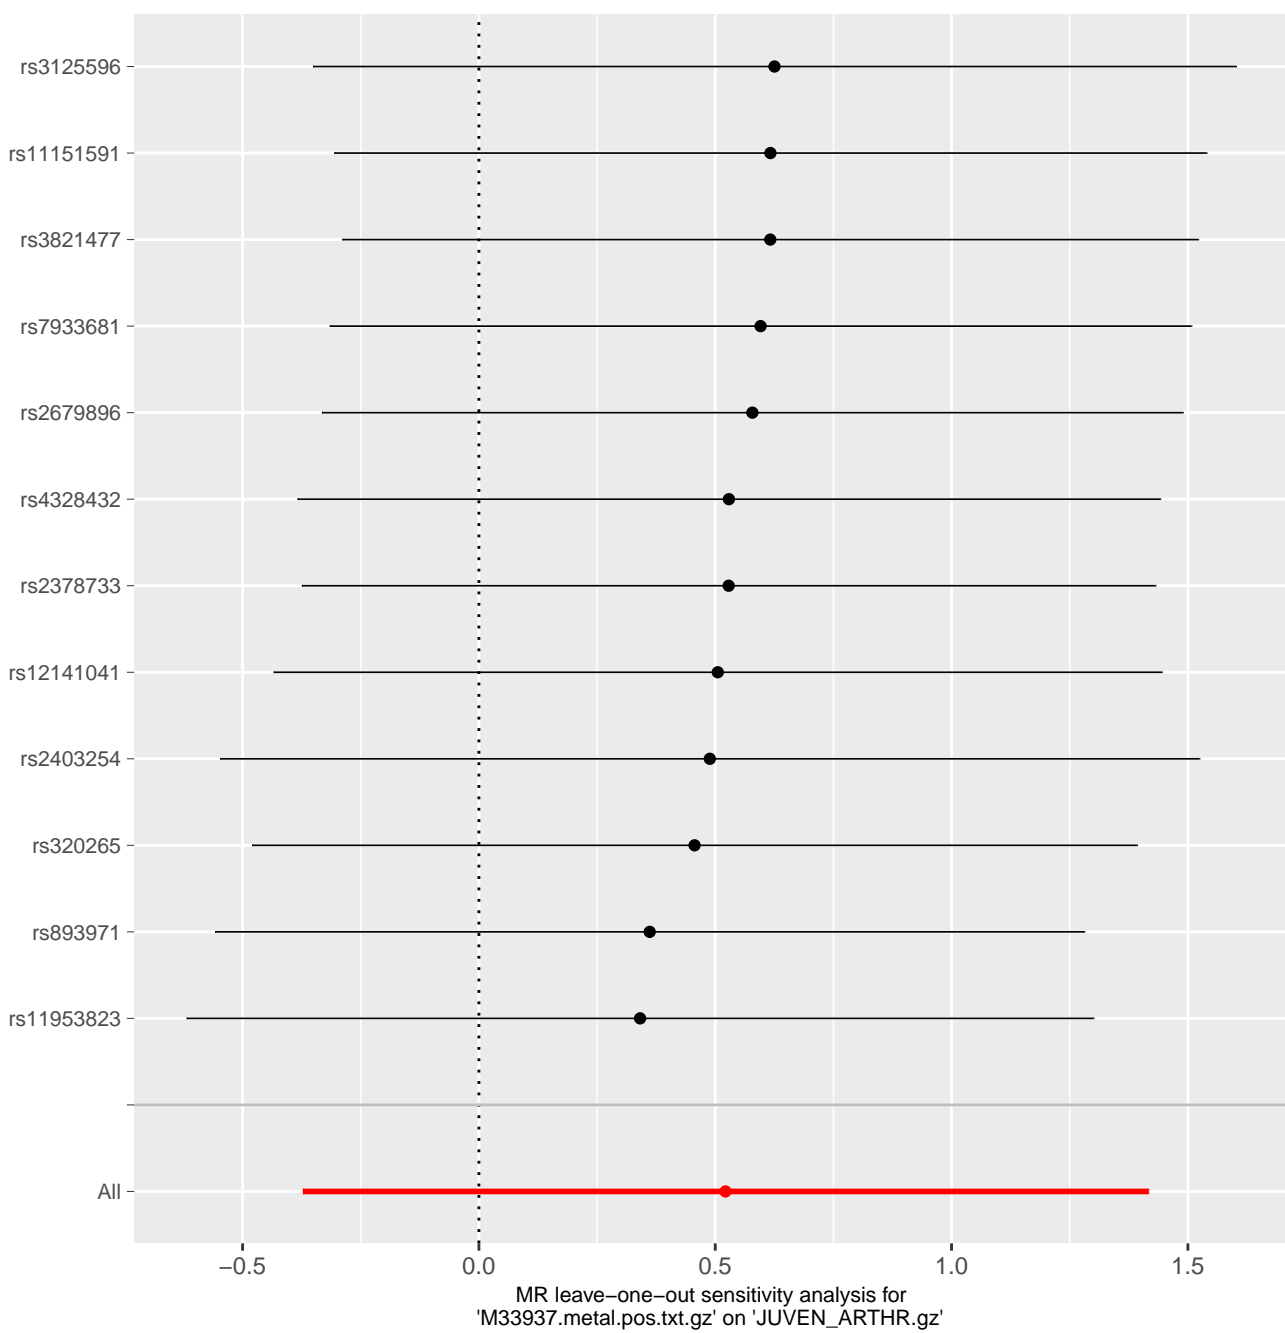

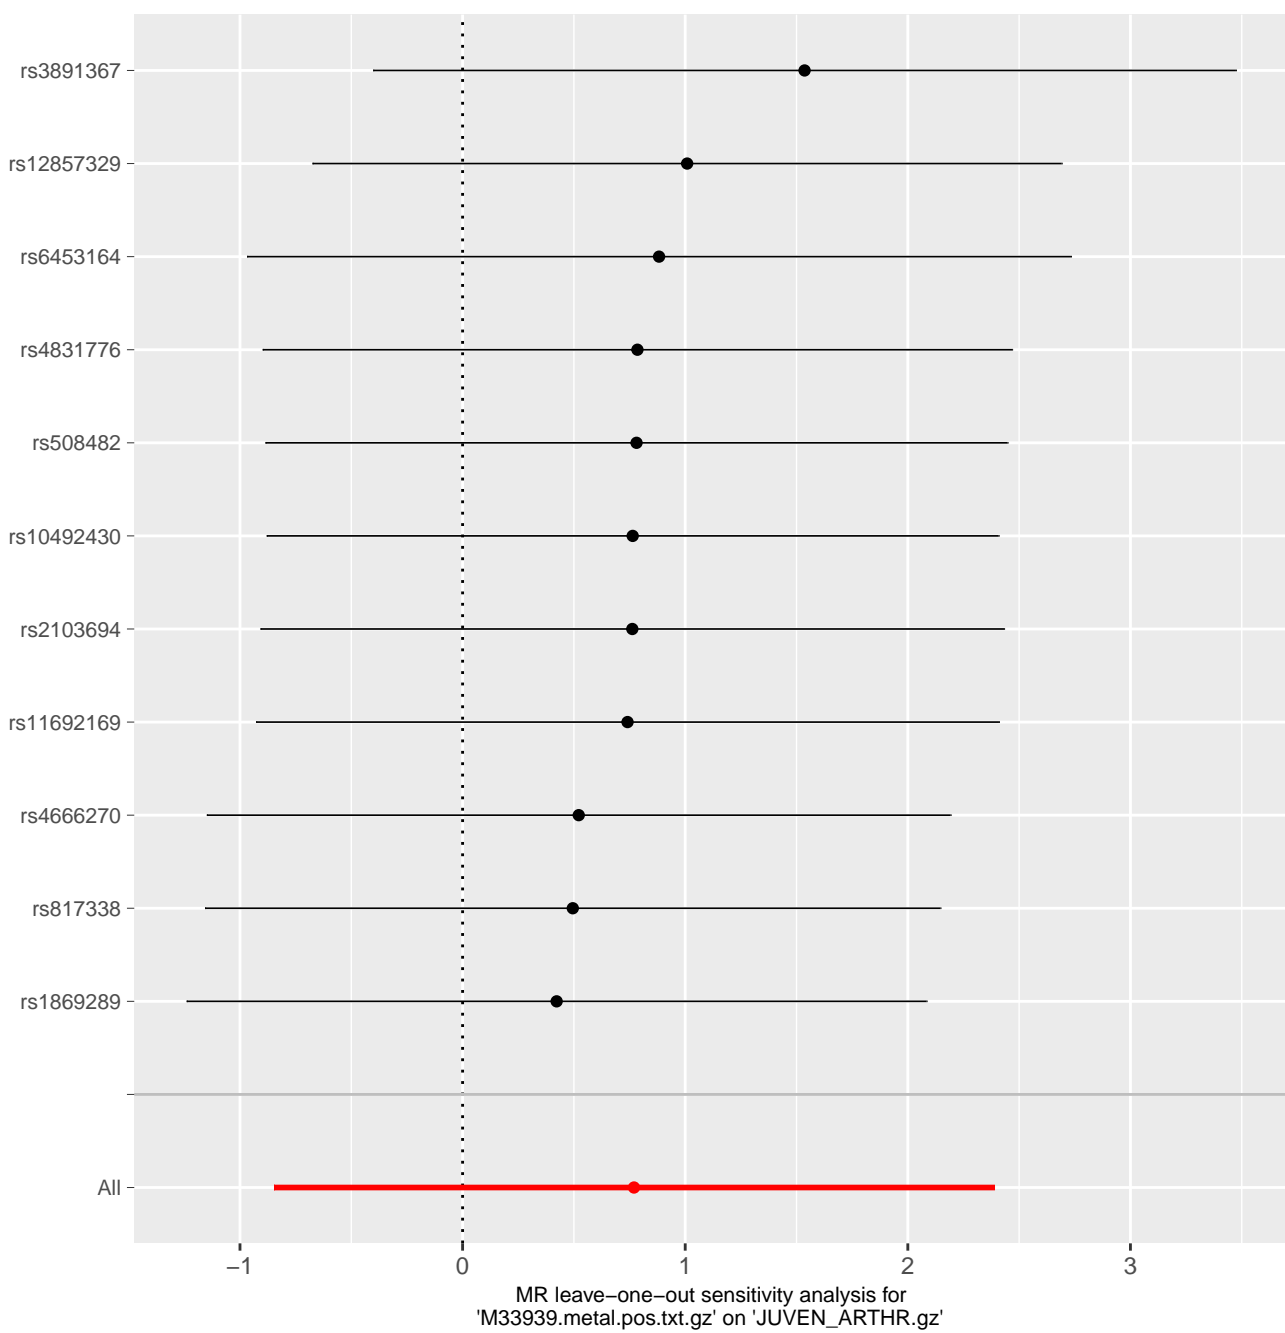

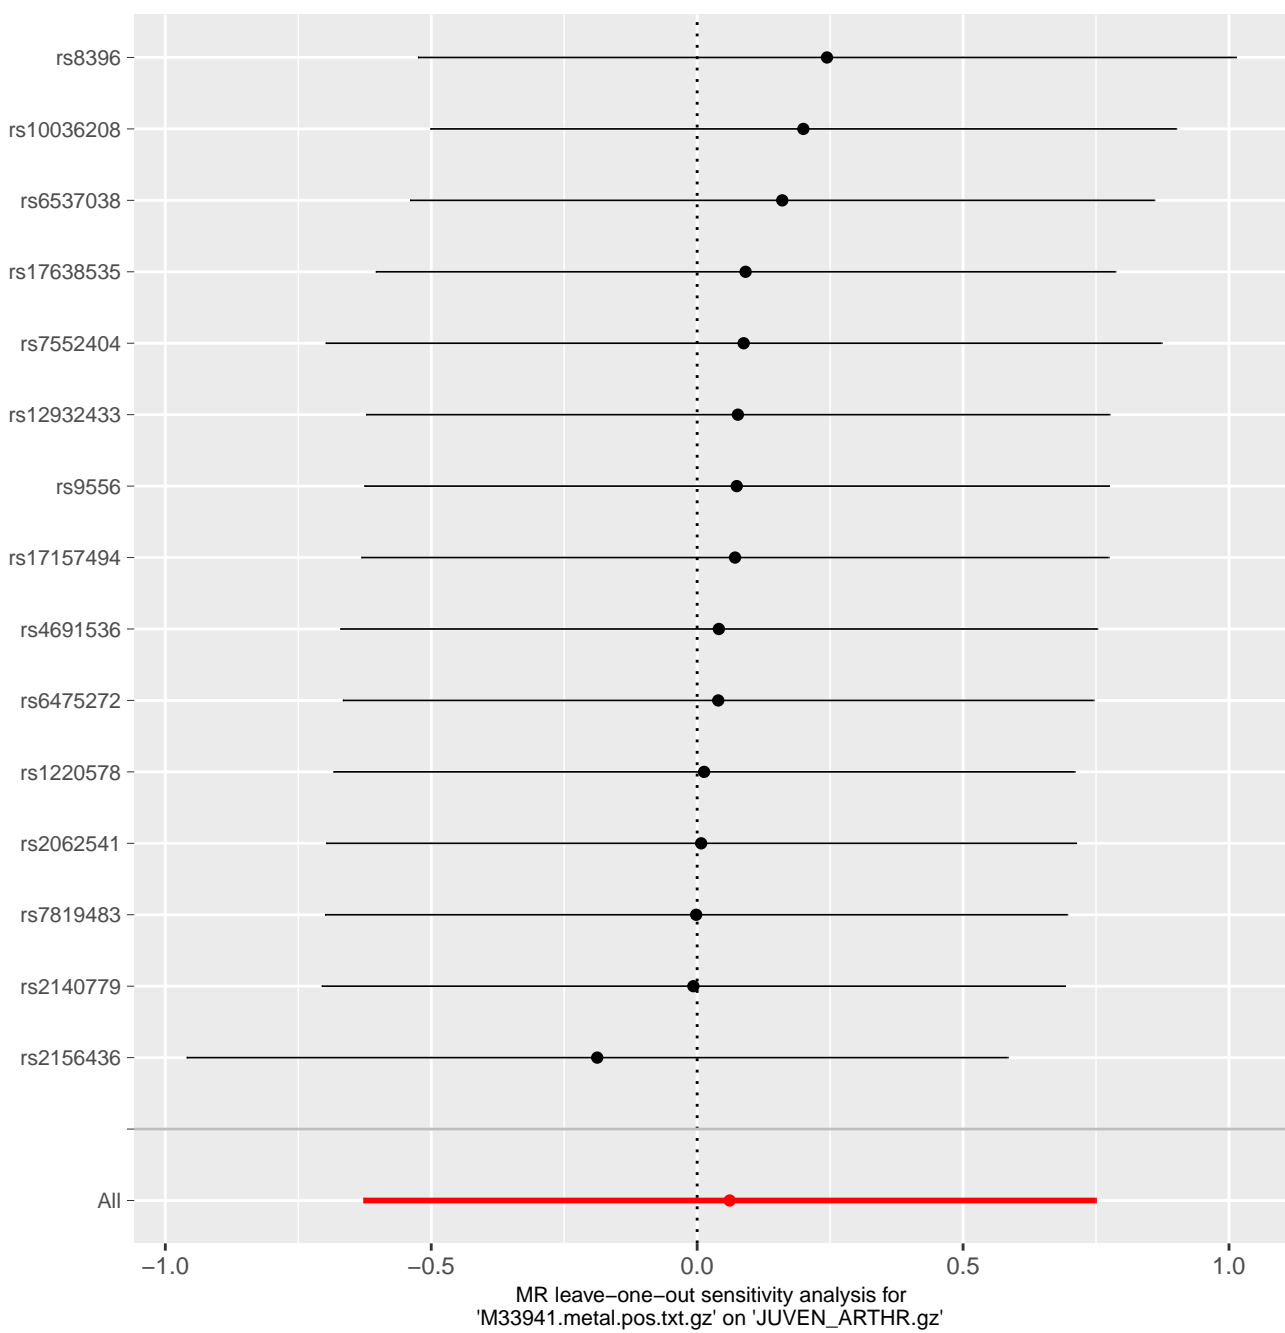



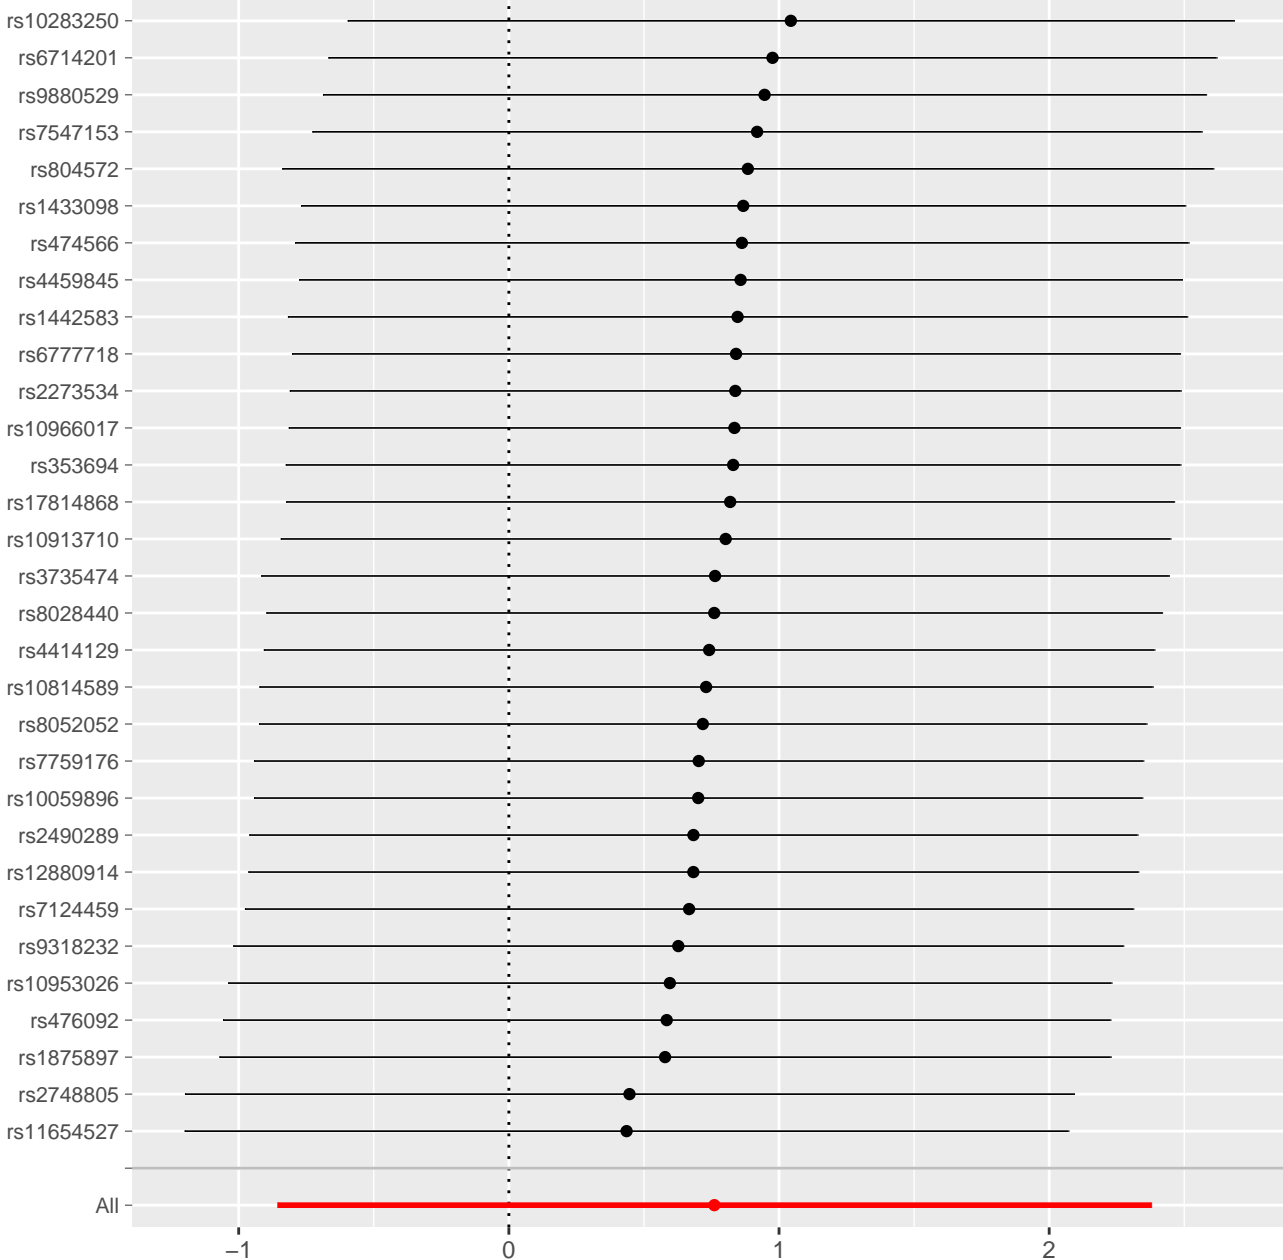

MR leave-one-out sensitivity analysis for 'M33955.metal.pos.txt.gz' on 'JUVEN\_ARTHR.gz'

rs8081778  
rs12100883  
rs10849438  
rs10019315  
rs3824359  
rs6833678  
rs7727774  
rs6530980  
rs6573597  
All

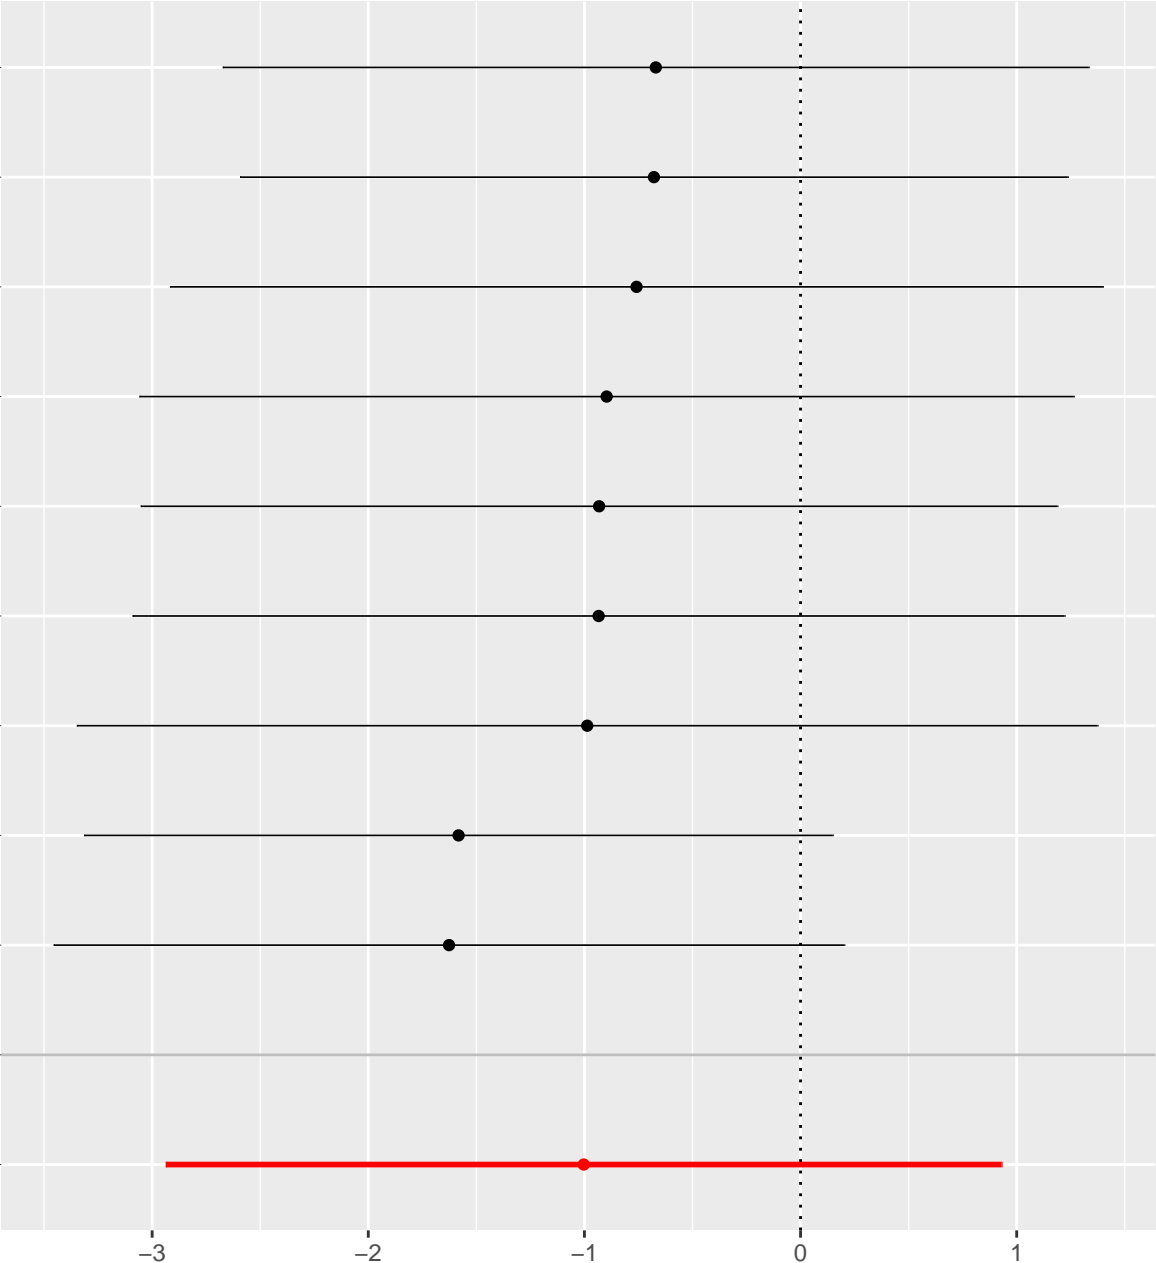

MR leave-one-out sensitivity analysis for 'M33957.metal.pos.txt.gz' on 'JUVEN\_ARTHR.gz'

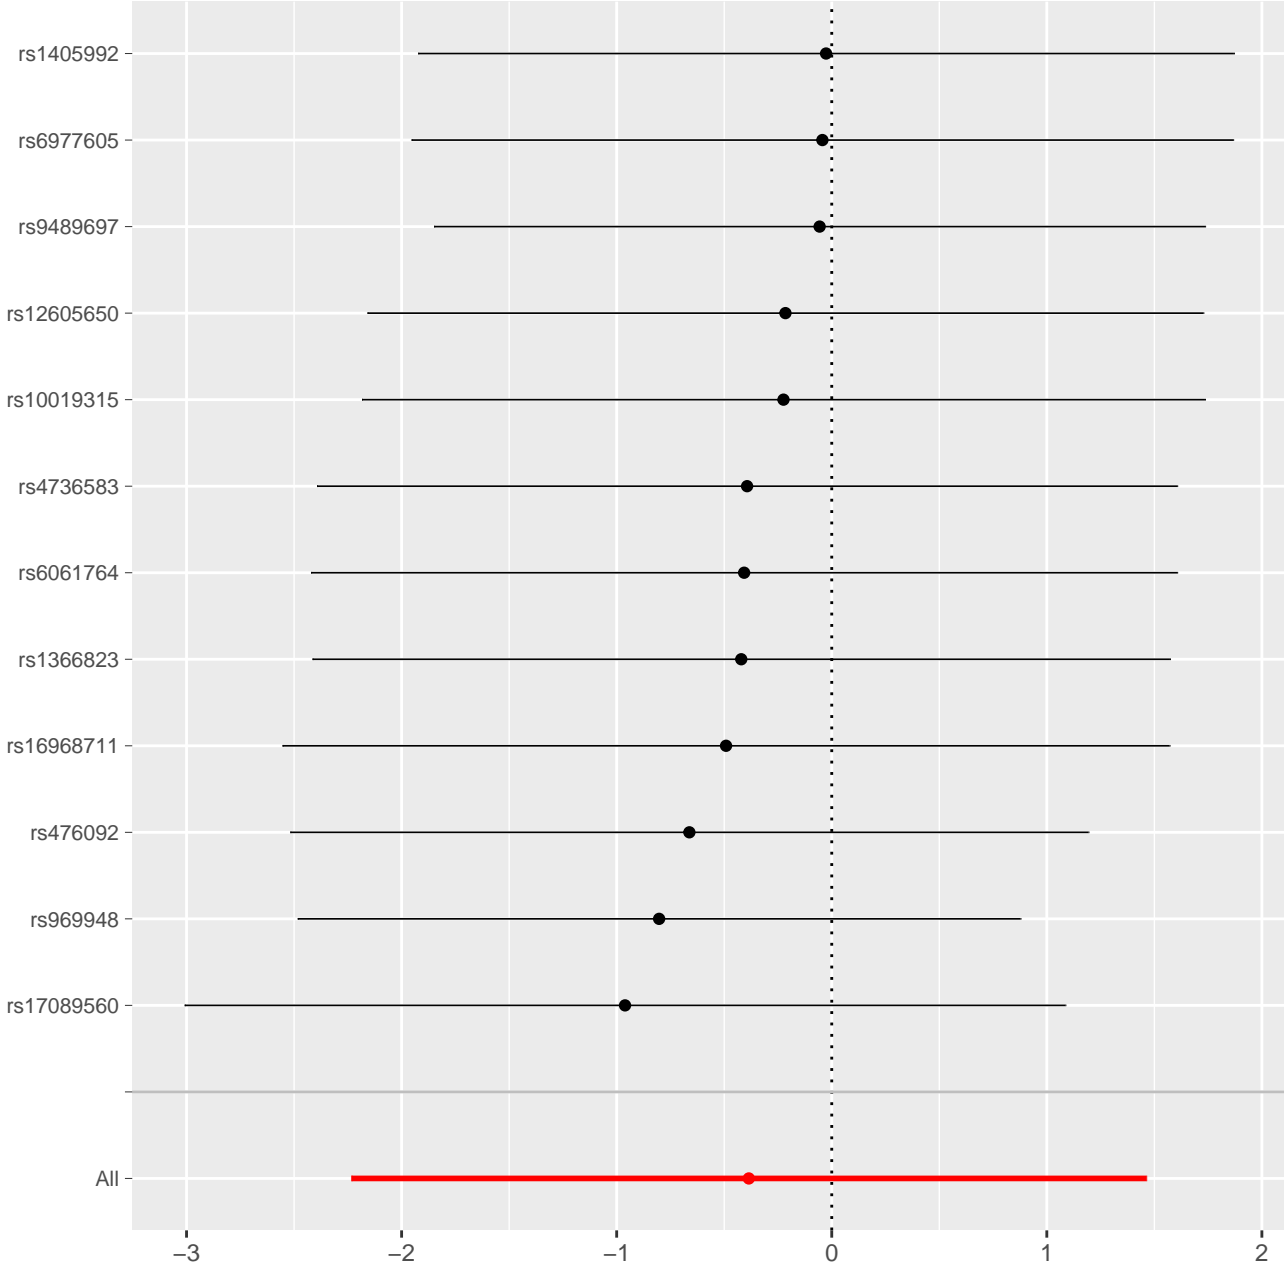

MR leave-one-out sensitivity analysis for 'M33960.metal.pos.txt.gz' on 'JUVEN\_ARTHR.gz'

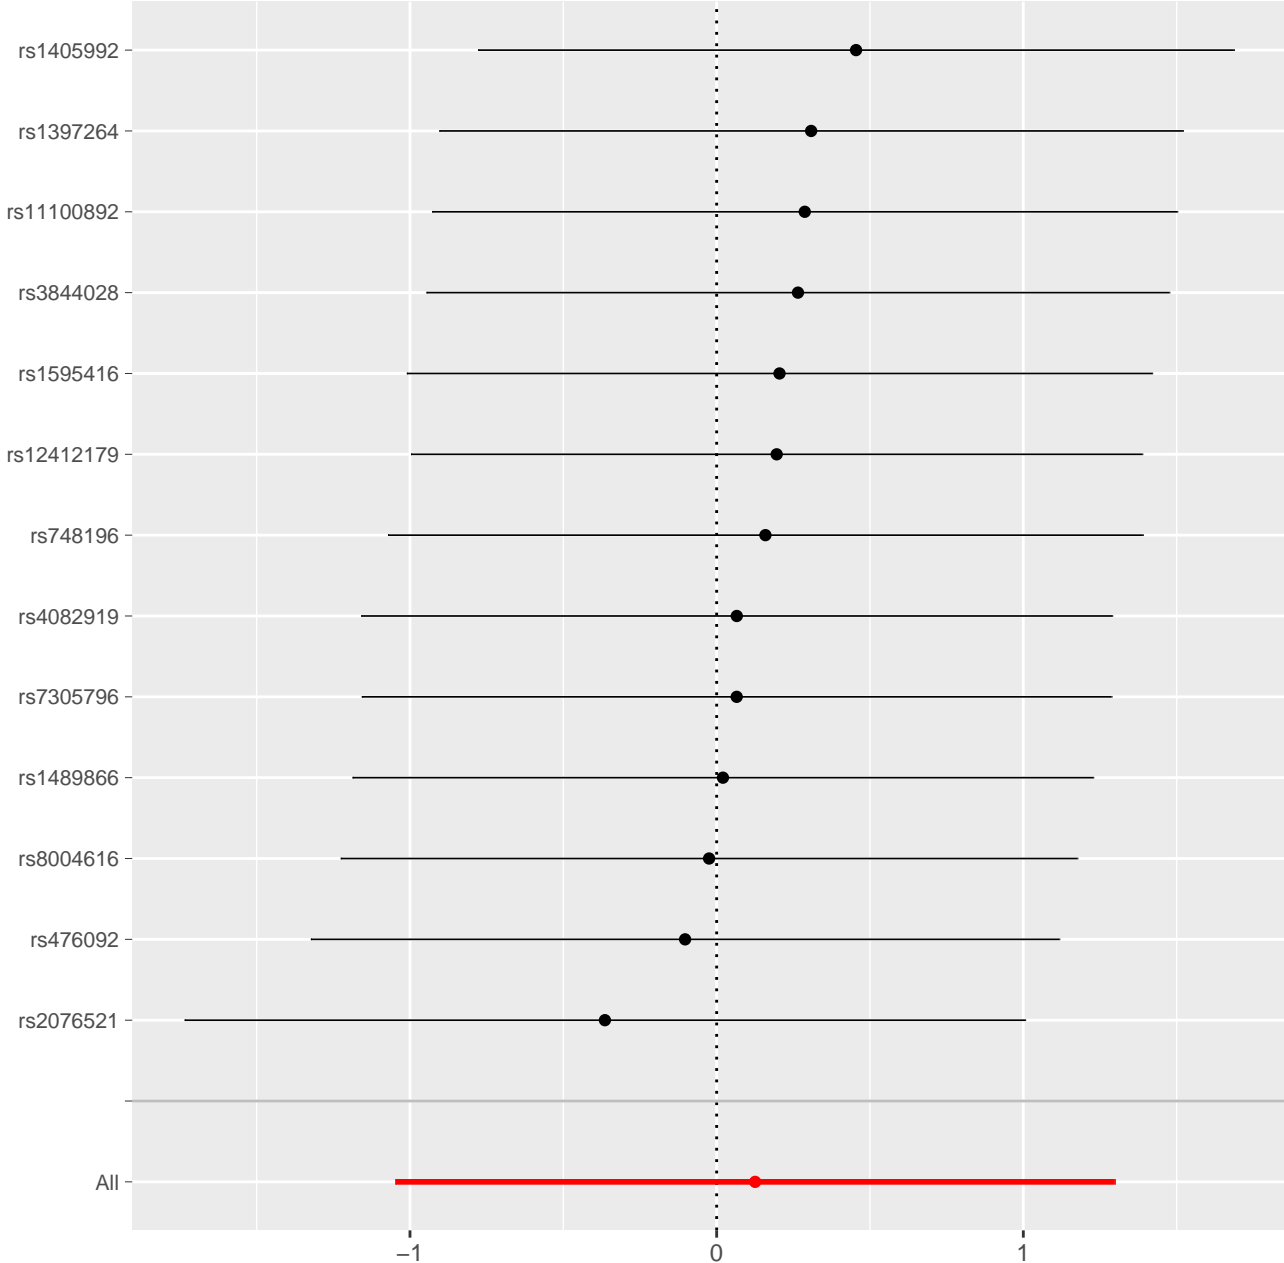

MR leave-one-out sensitivity analysis for 'M33961.metal.pos.txt.gz' on 'JUVEN\_ARTHR.gz'

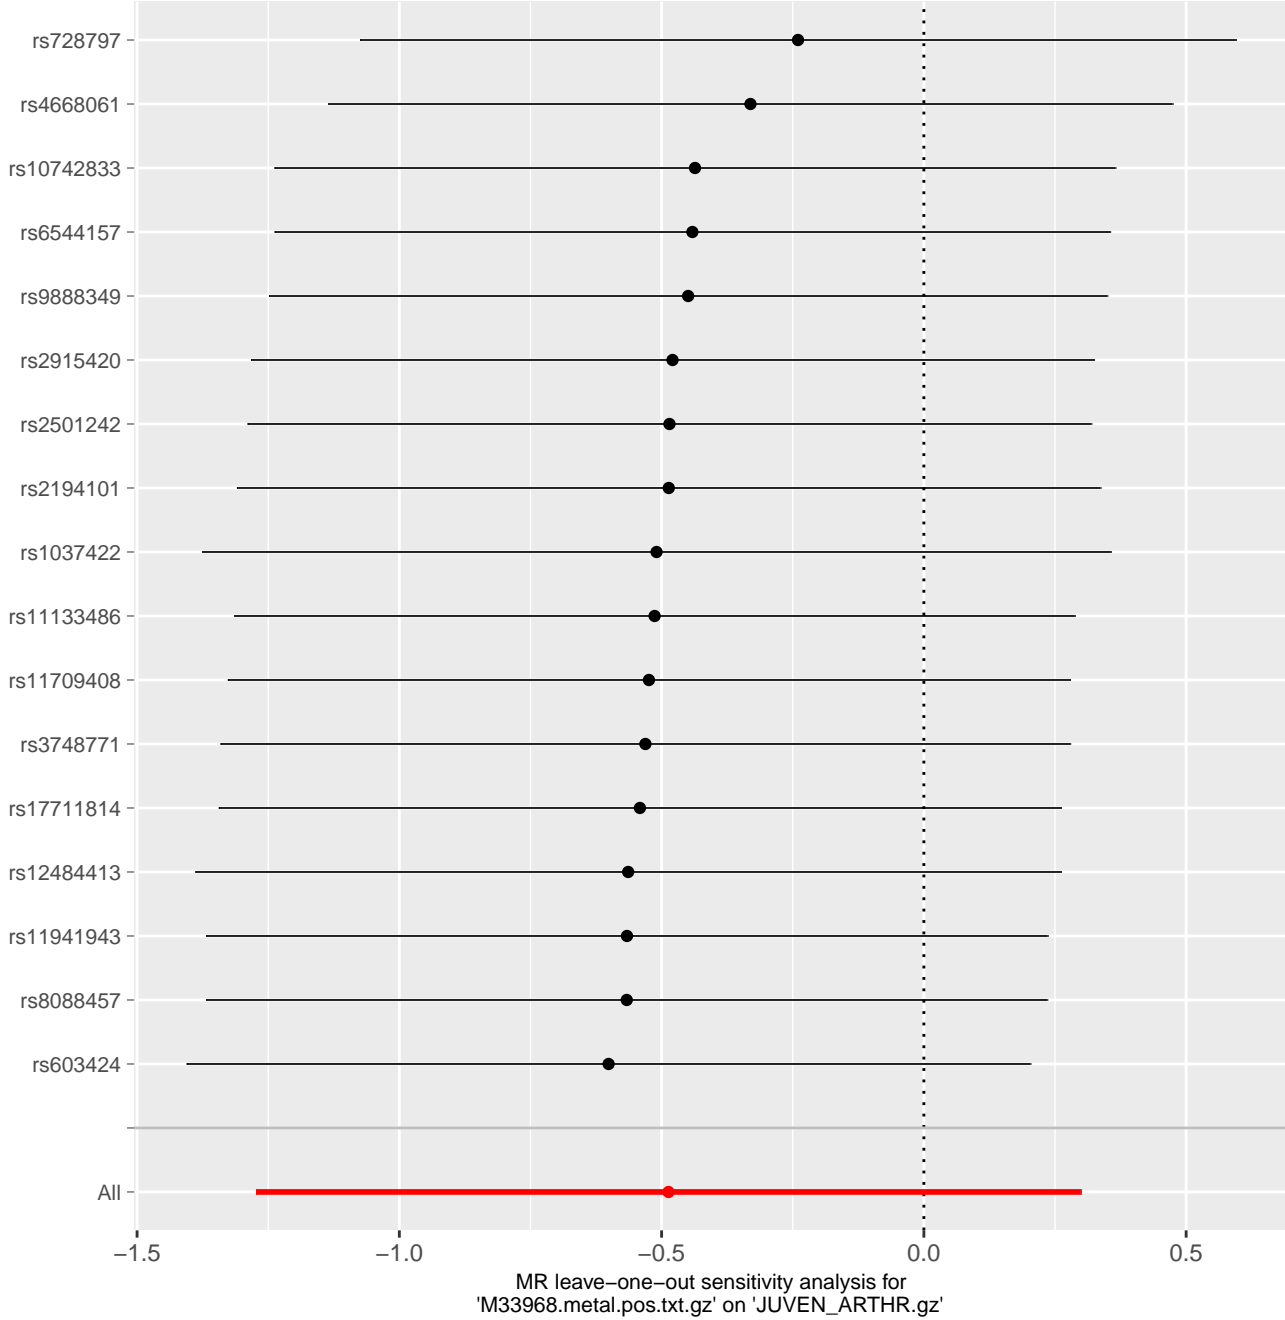

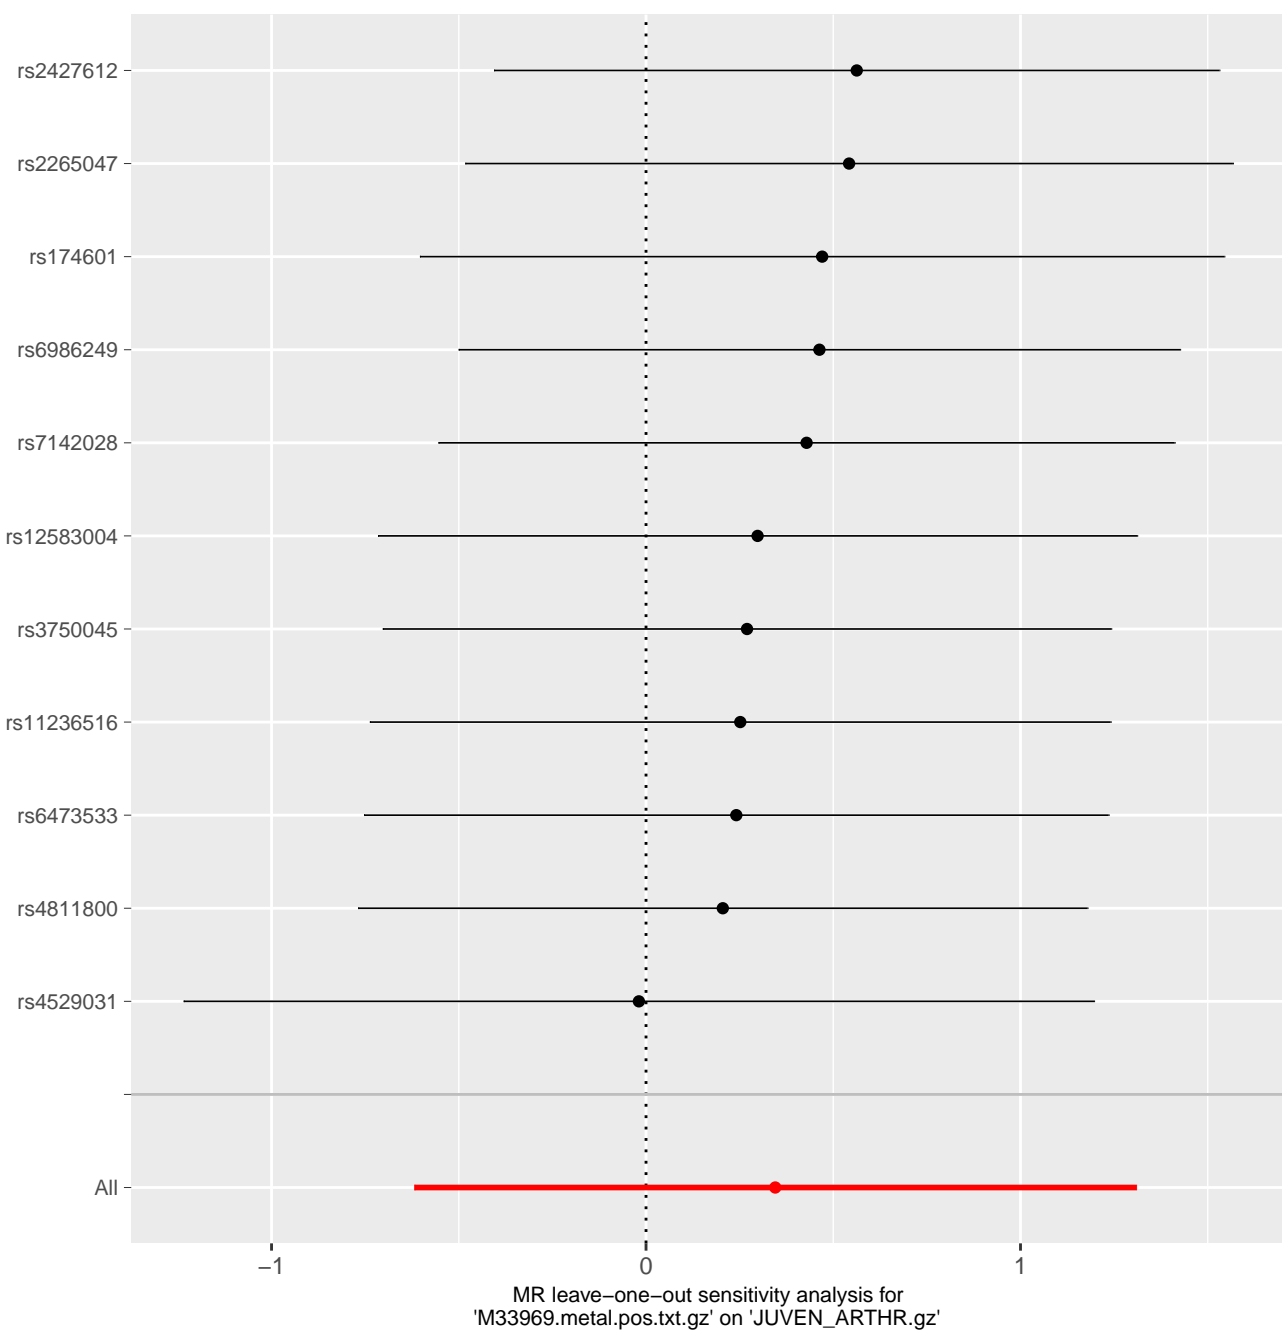

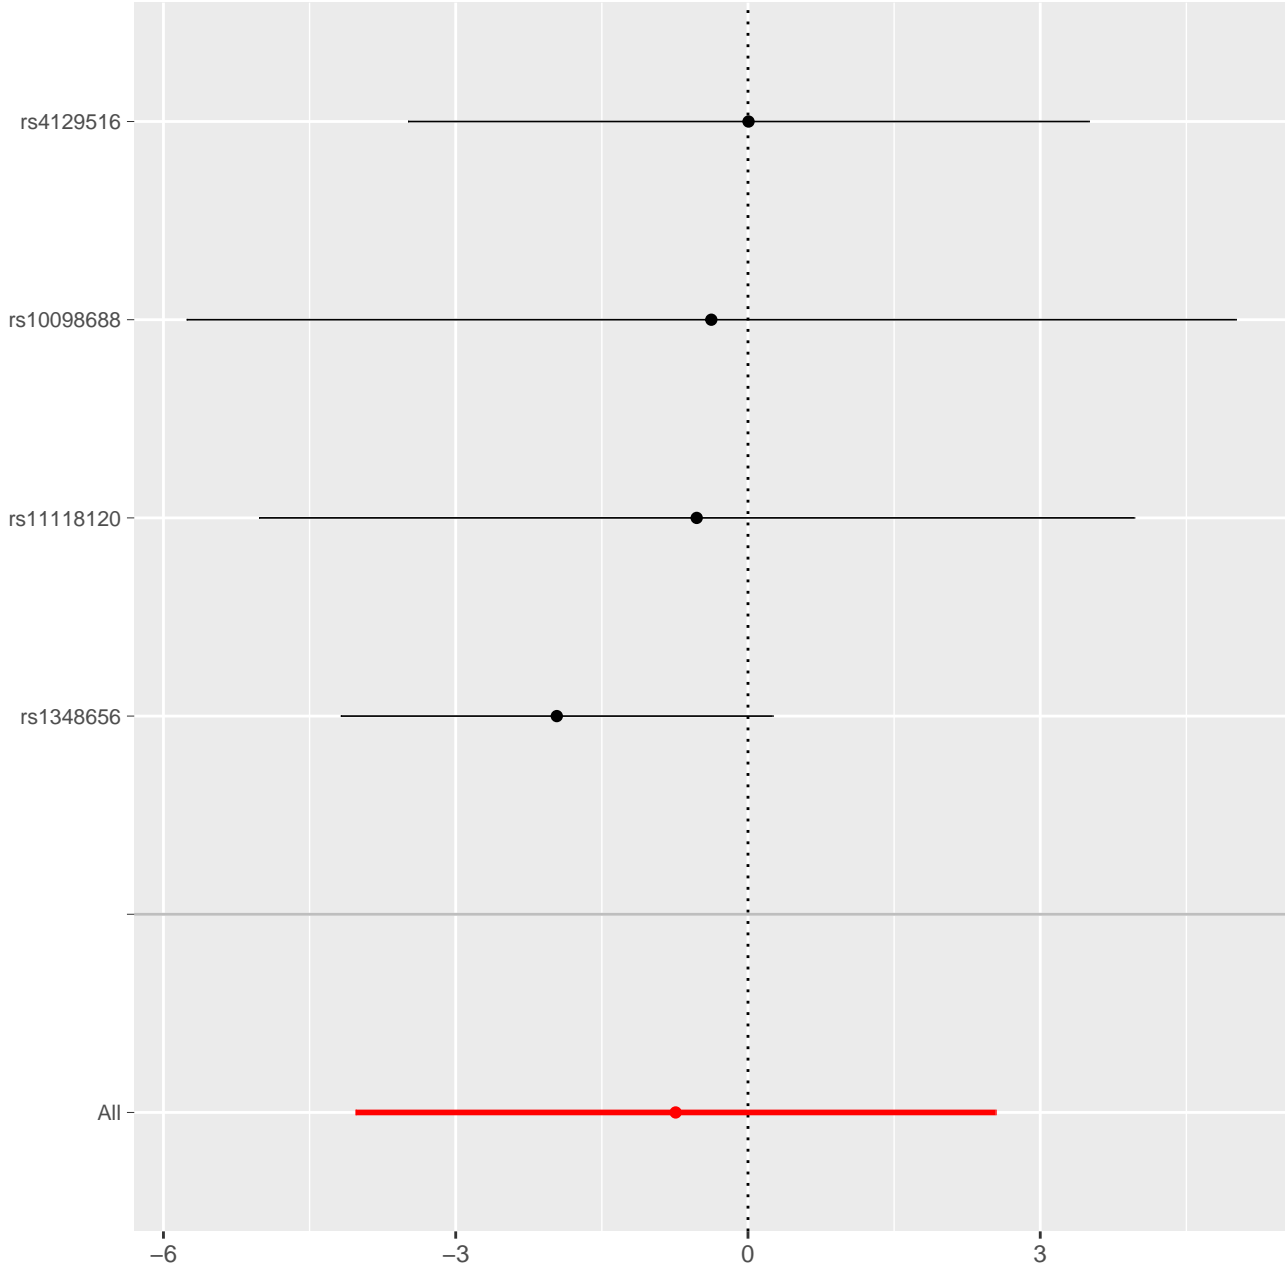

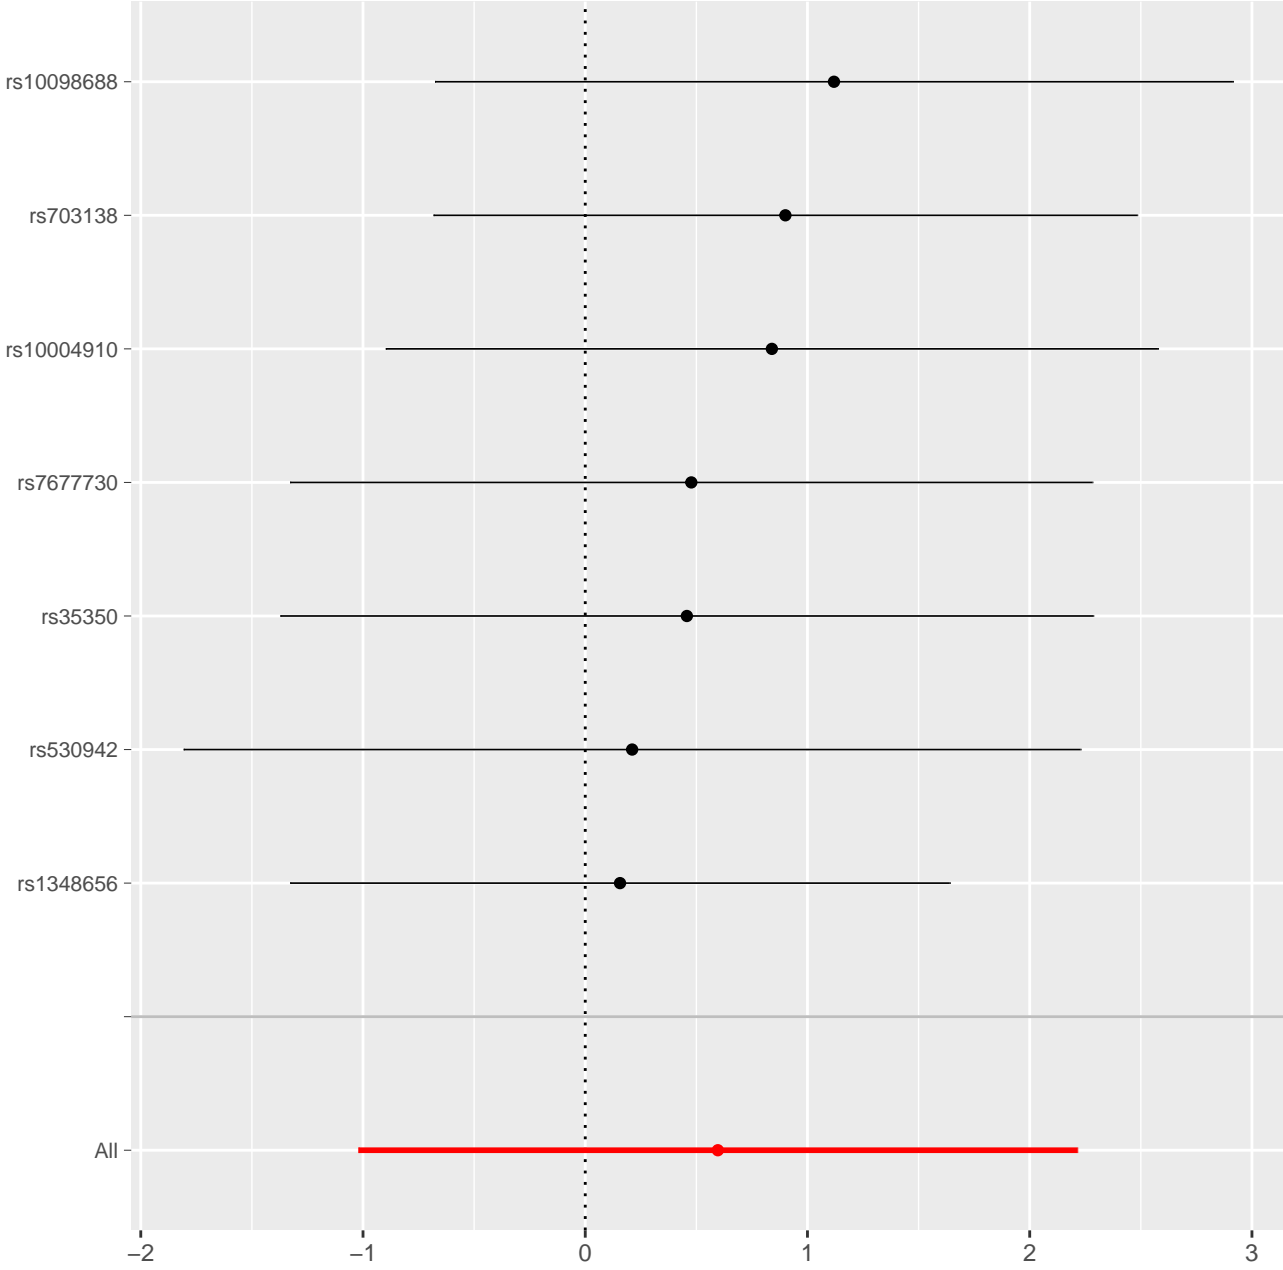

MR leave-one-out sensitivity analysis for 'M33972.metal.pos.txt.gz' on 'JUVEN\_ARTHR.gz'



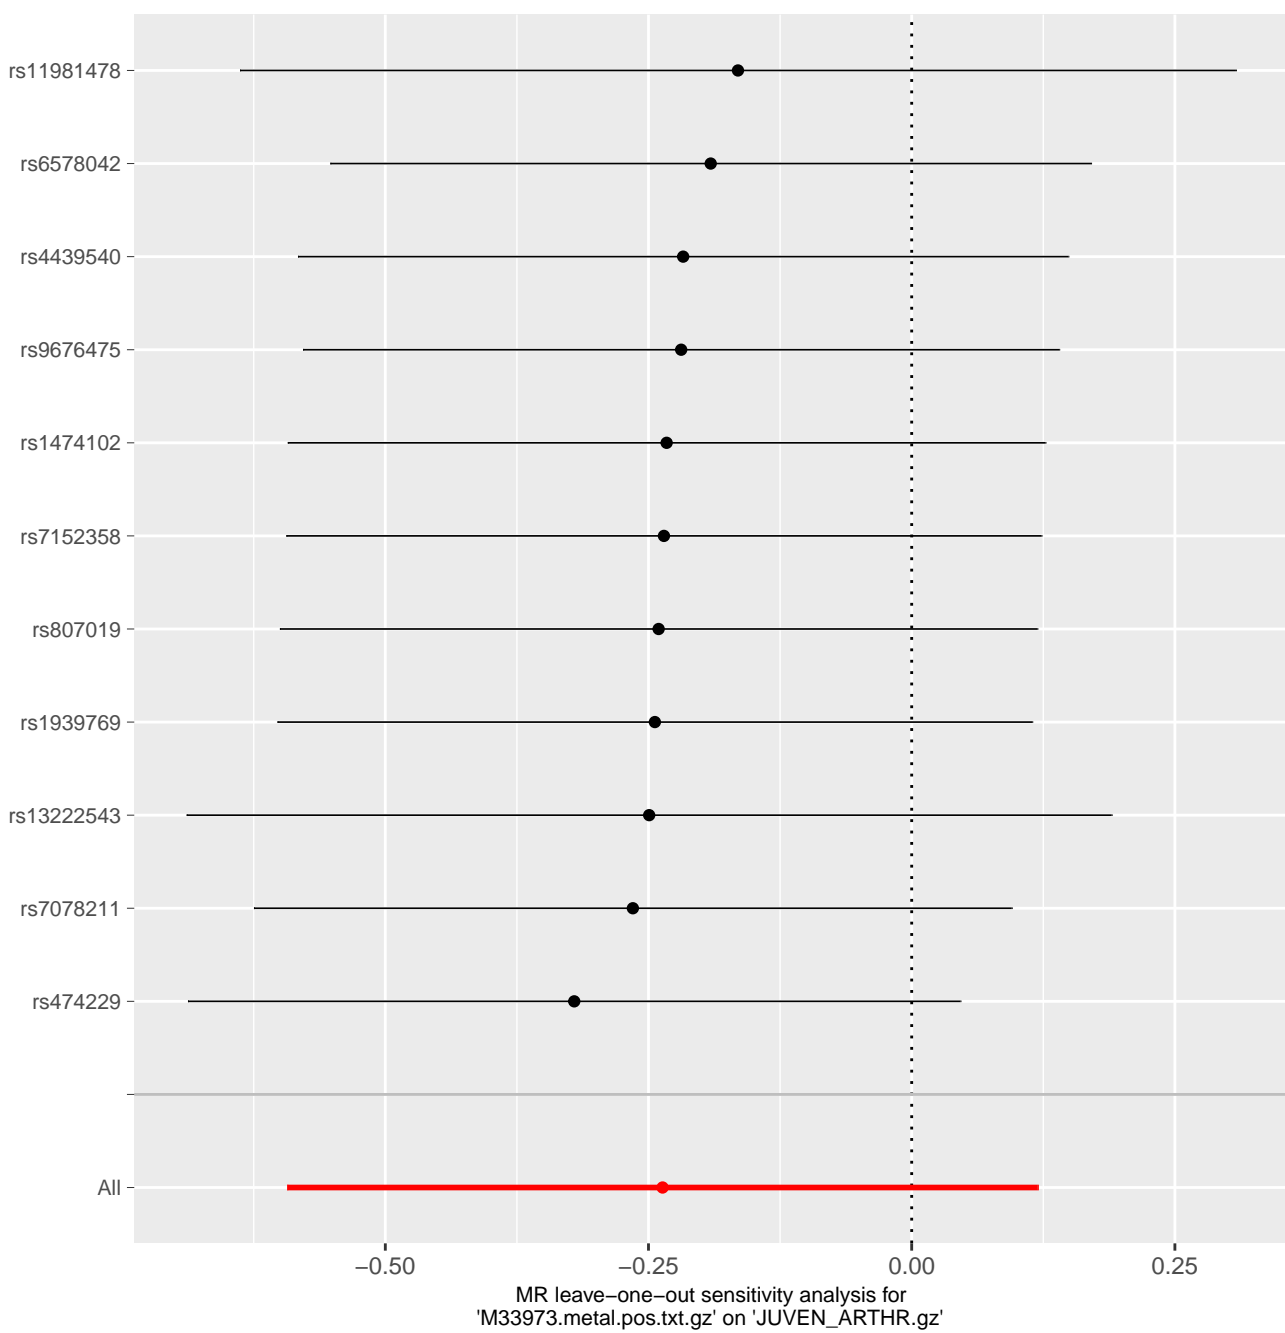

rs1034879

rs1348656

rs2242415

All

0.0

2.5

5.0

7.5

MR leave-one-out sensitivity analysis for  
'M34035.metal.pos.txt.gz' on 'JUVEN\_ARTHR.gz'

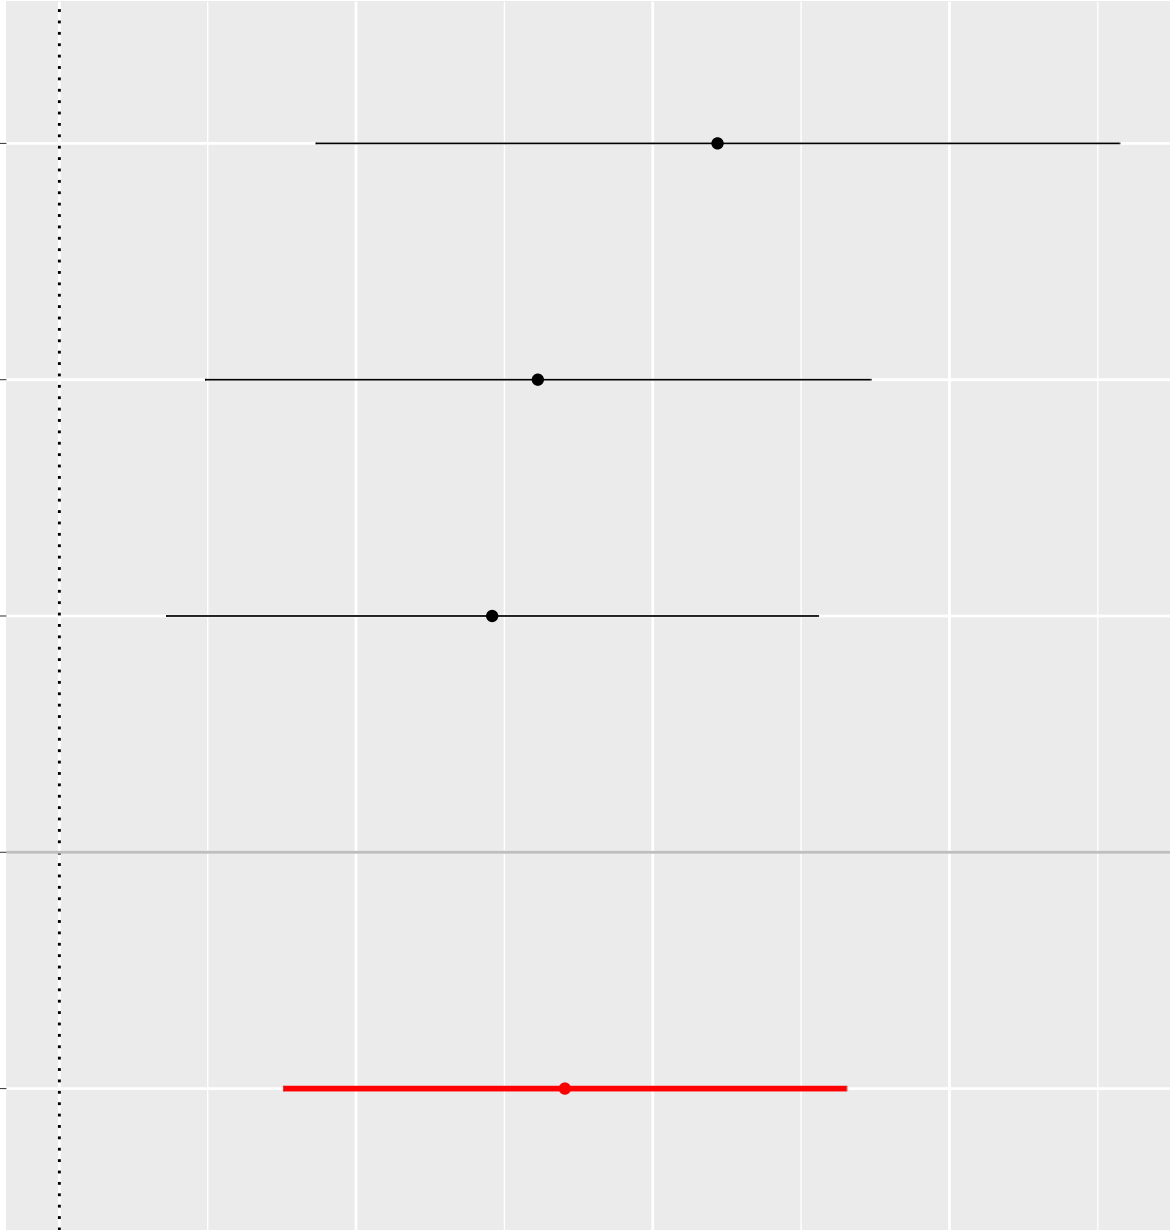

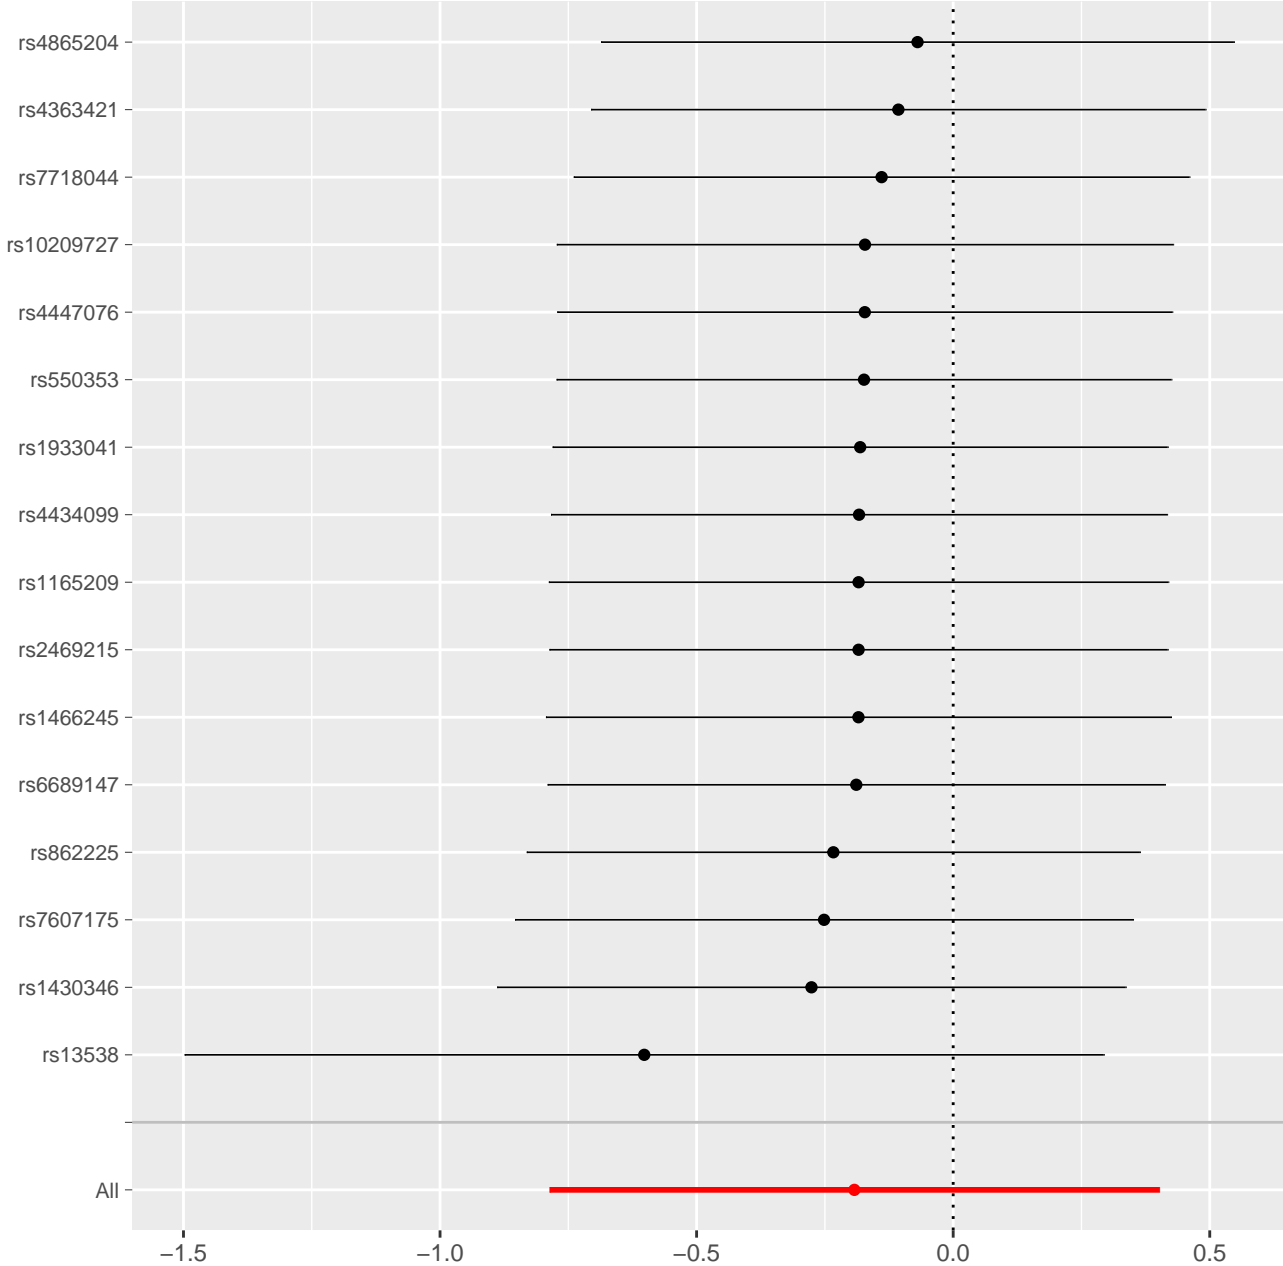

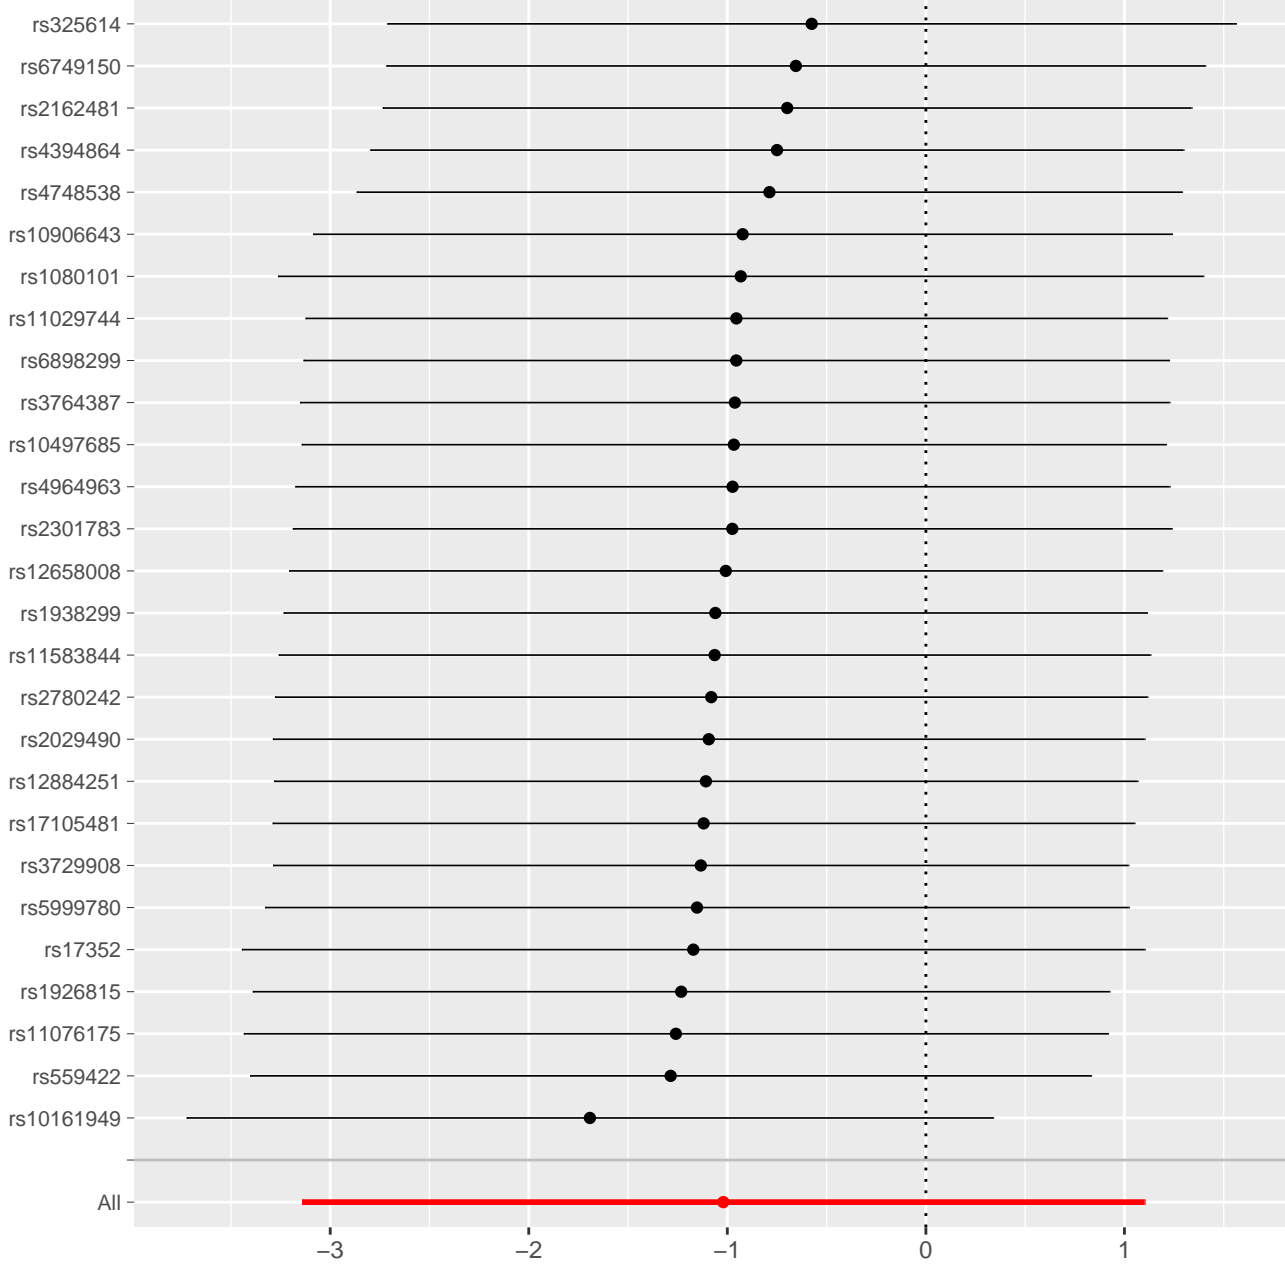

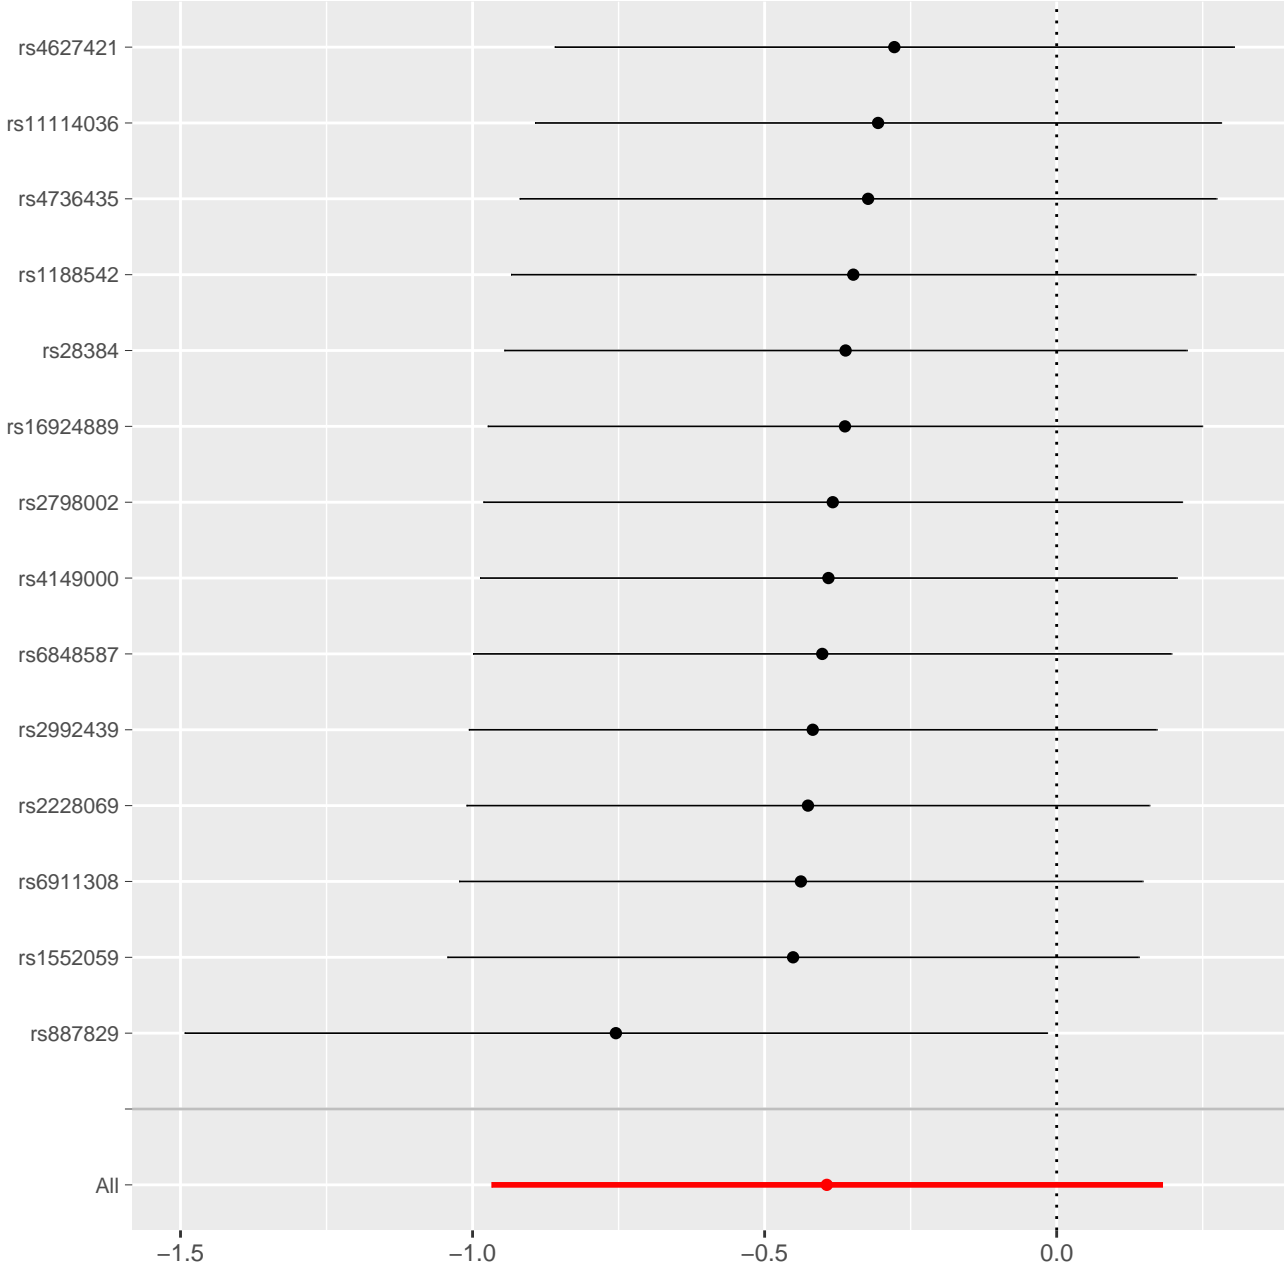

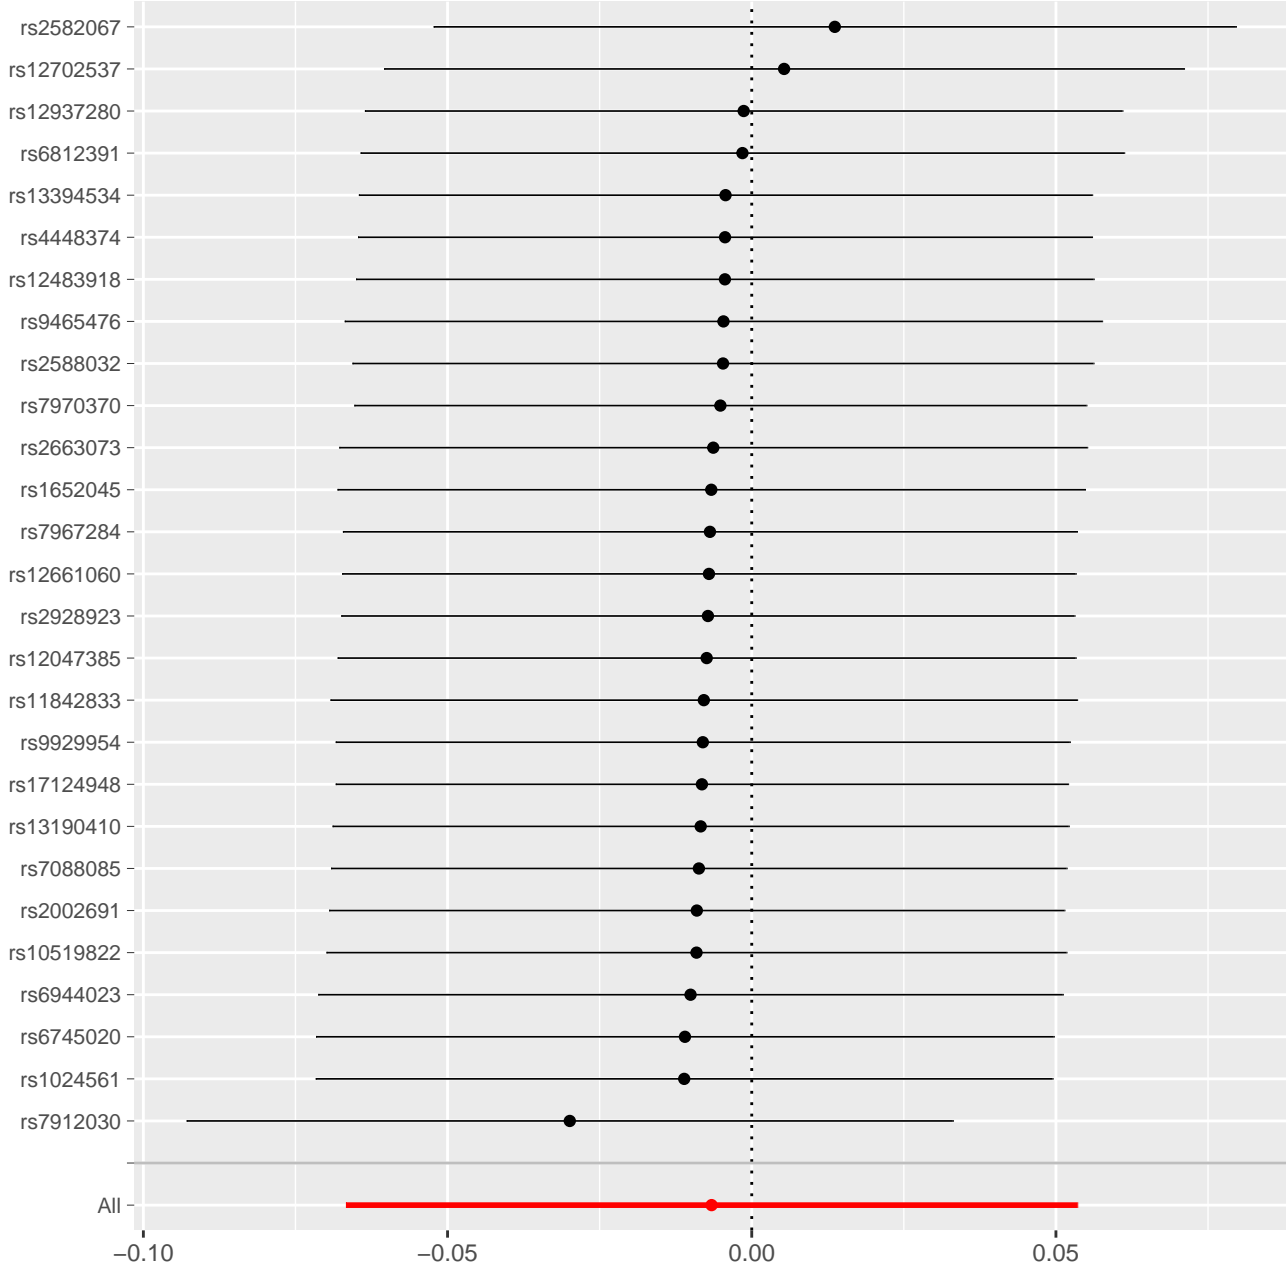

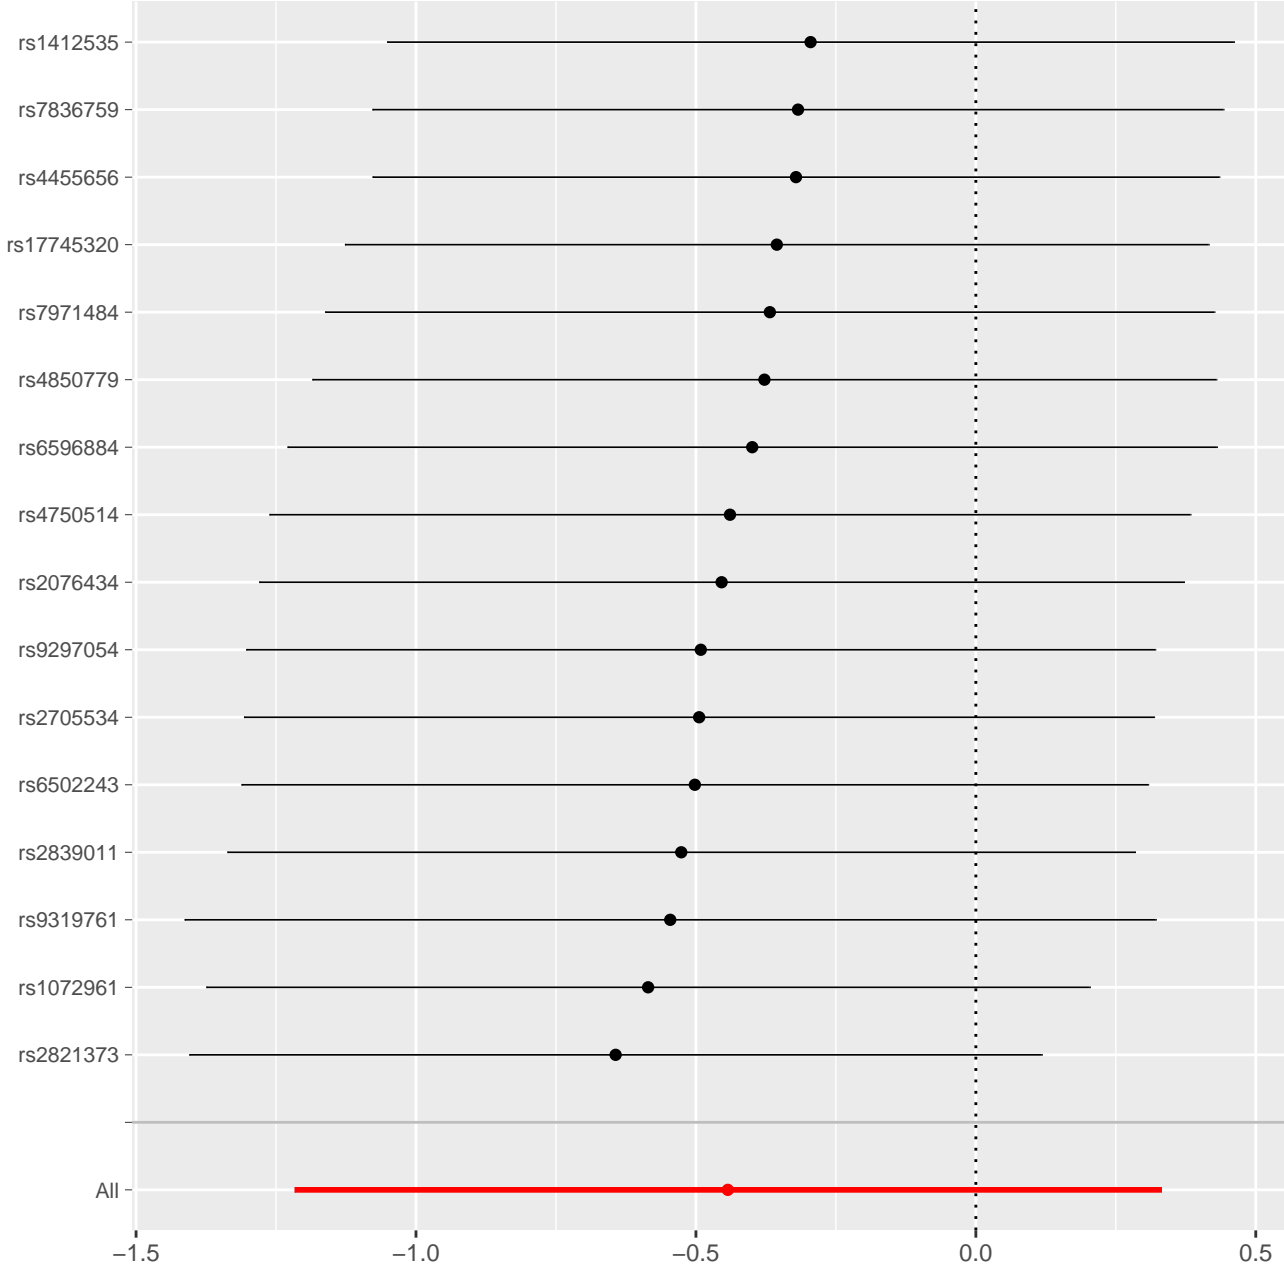

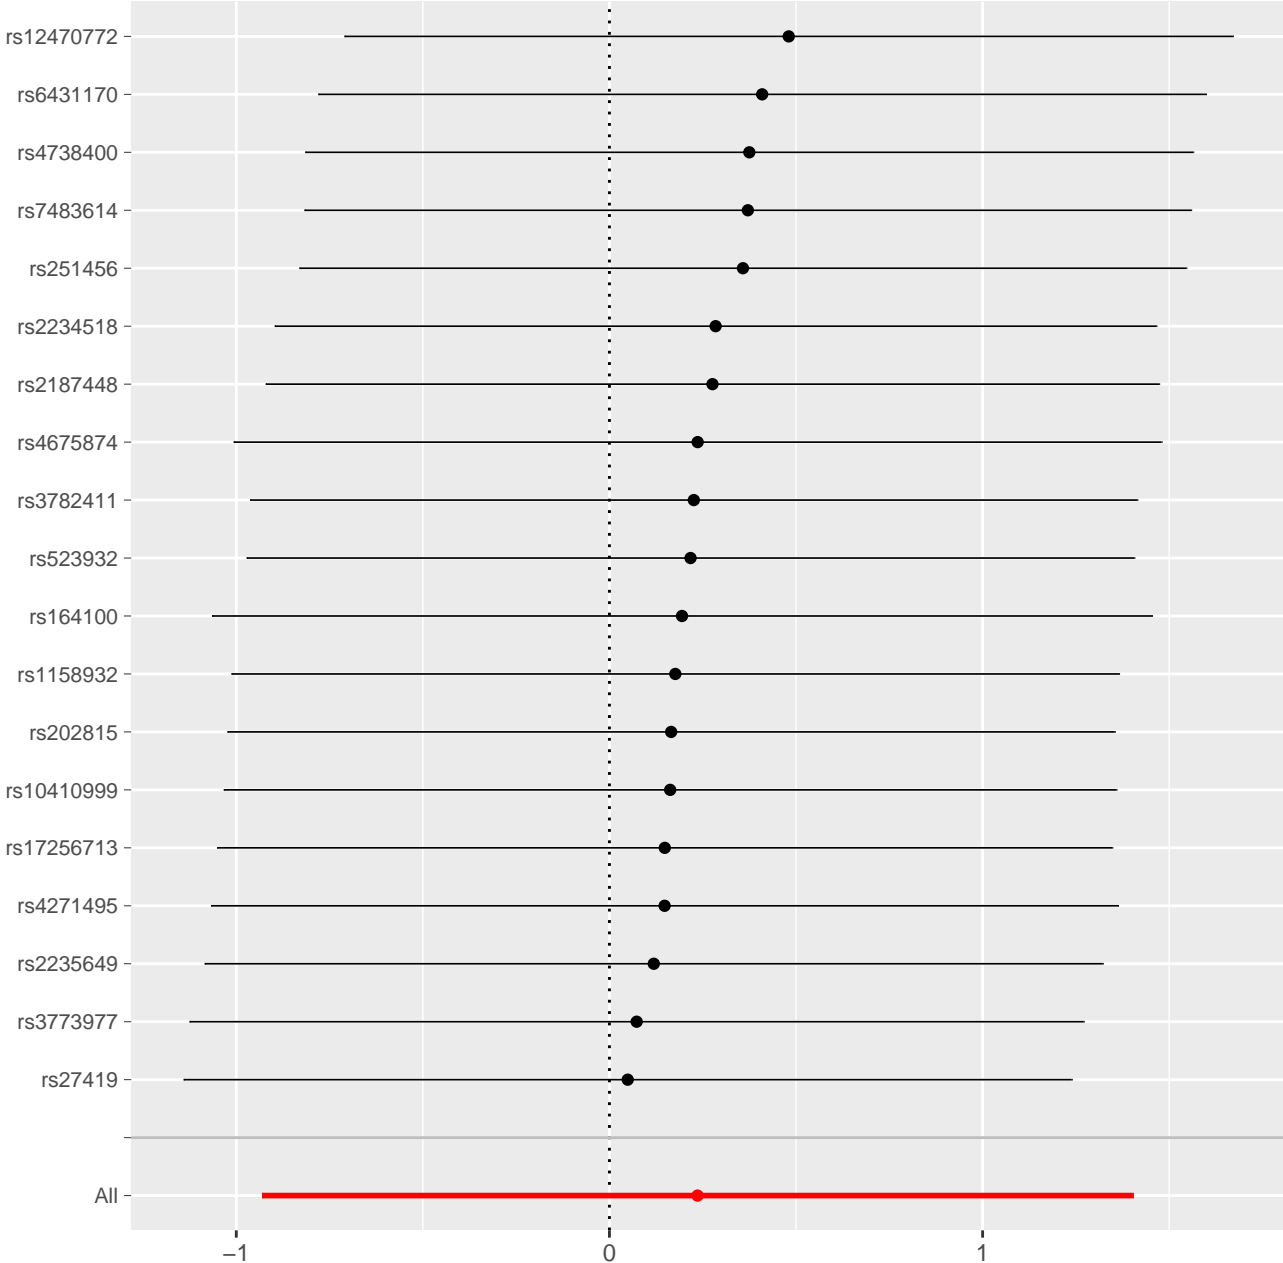

MR leave-one-out sensitivity analysis for 'M34123.metal.pos.txt.gz' on 'JUVEN\_ARTHR.gz'



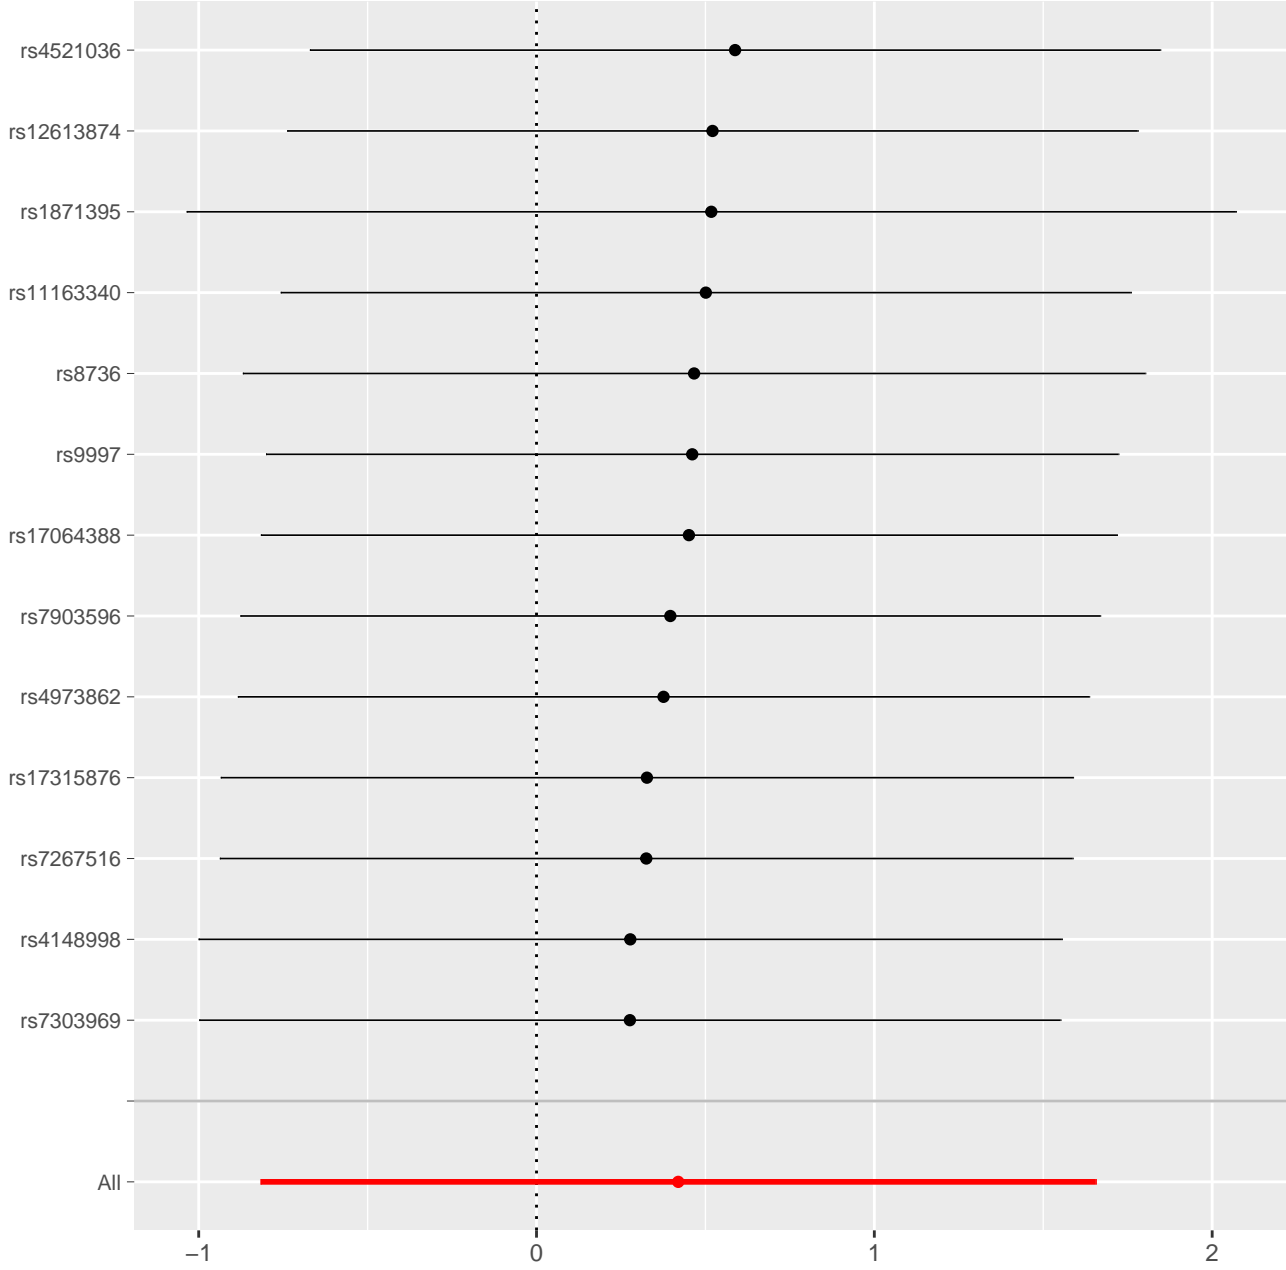

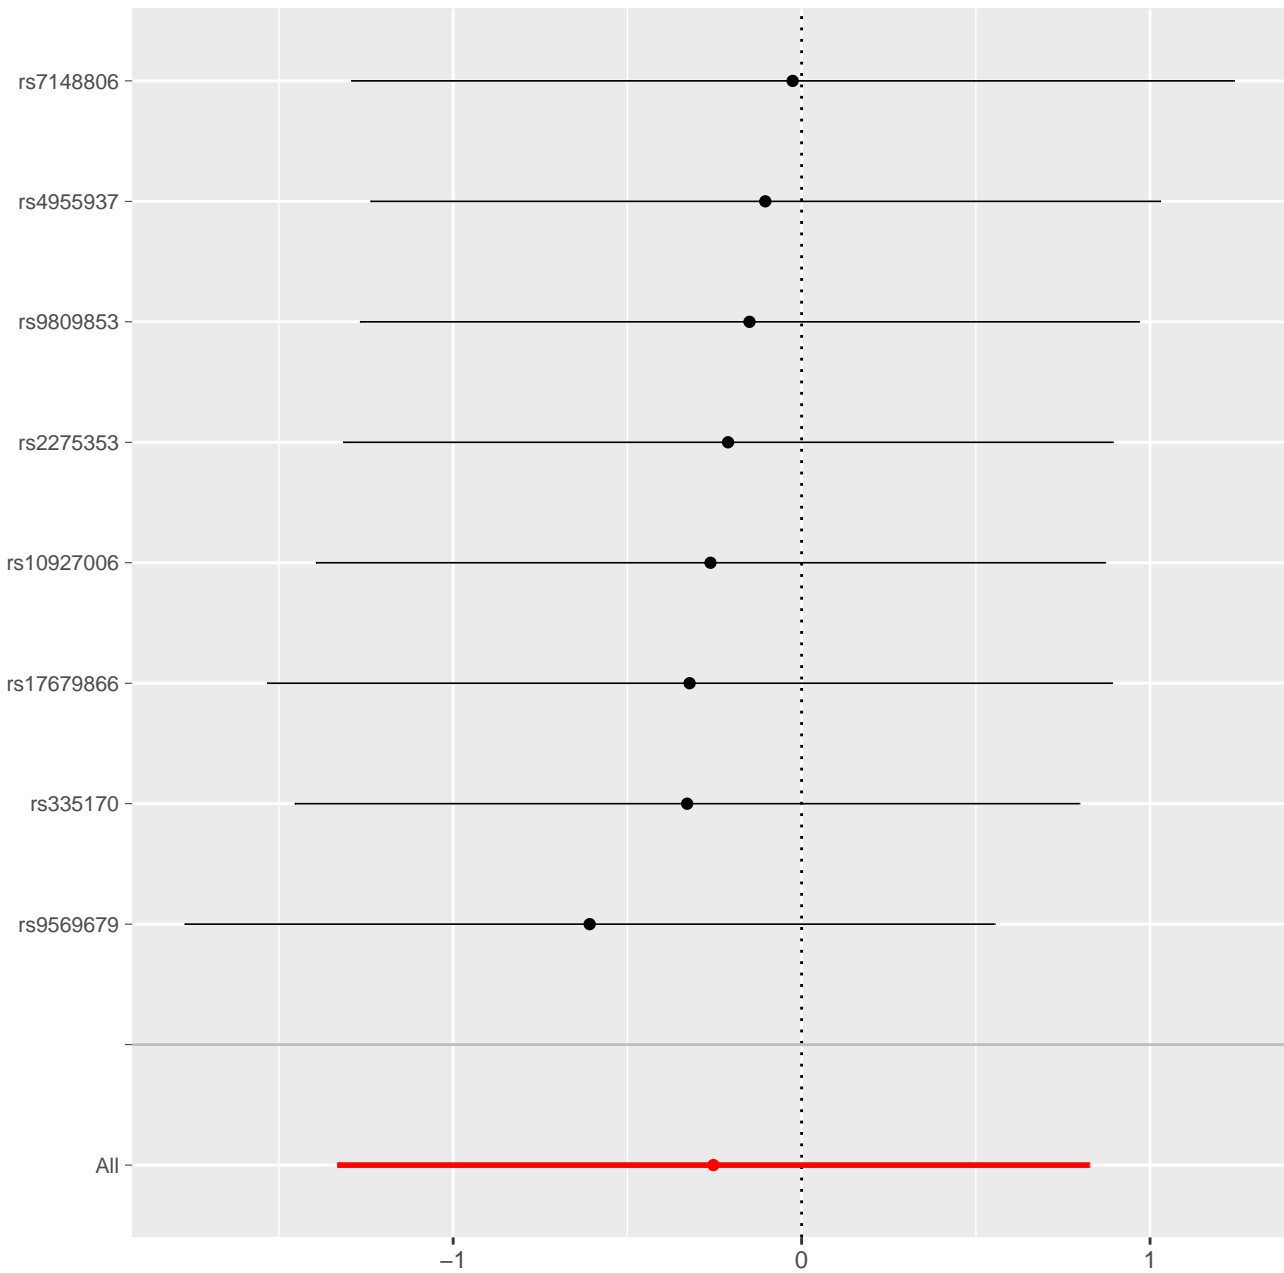

MR leave-one-out sensitivity analysis for 'M34221.metal.pos.txt.gz' on 'JUVEN\_ARTHR.gz'

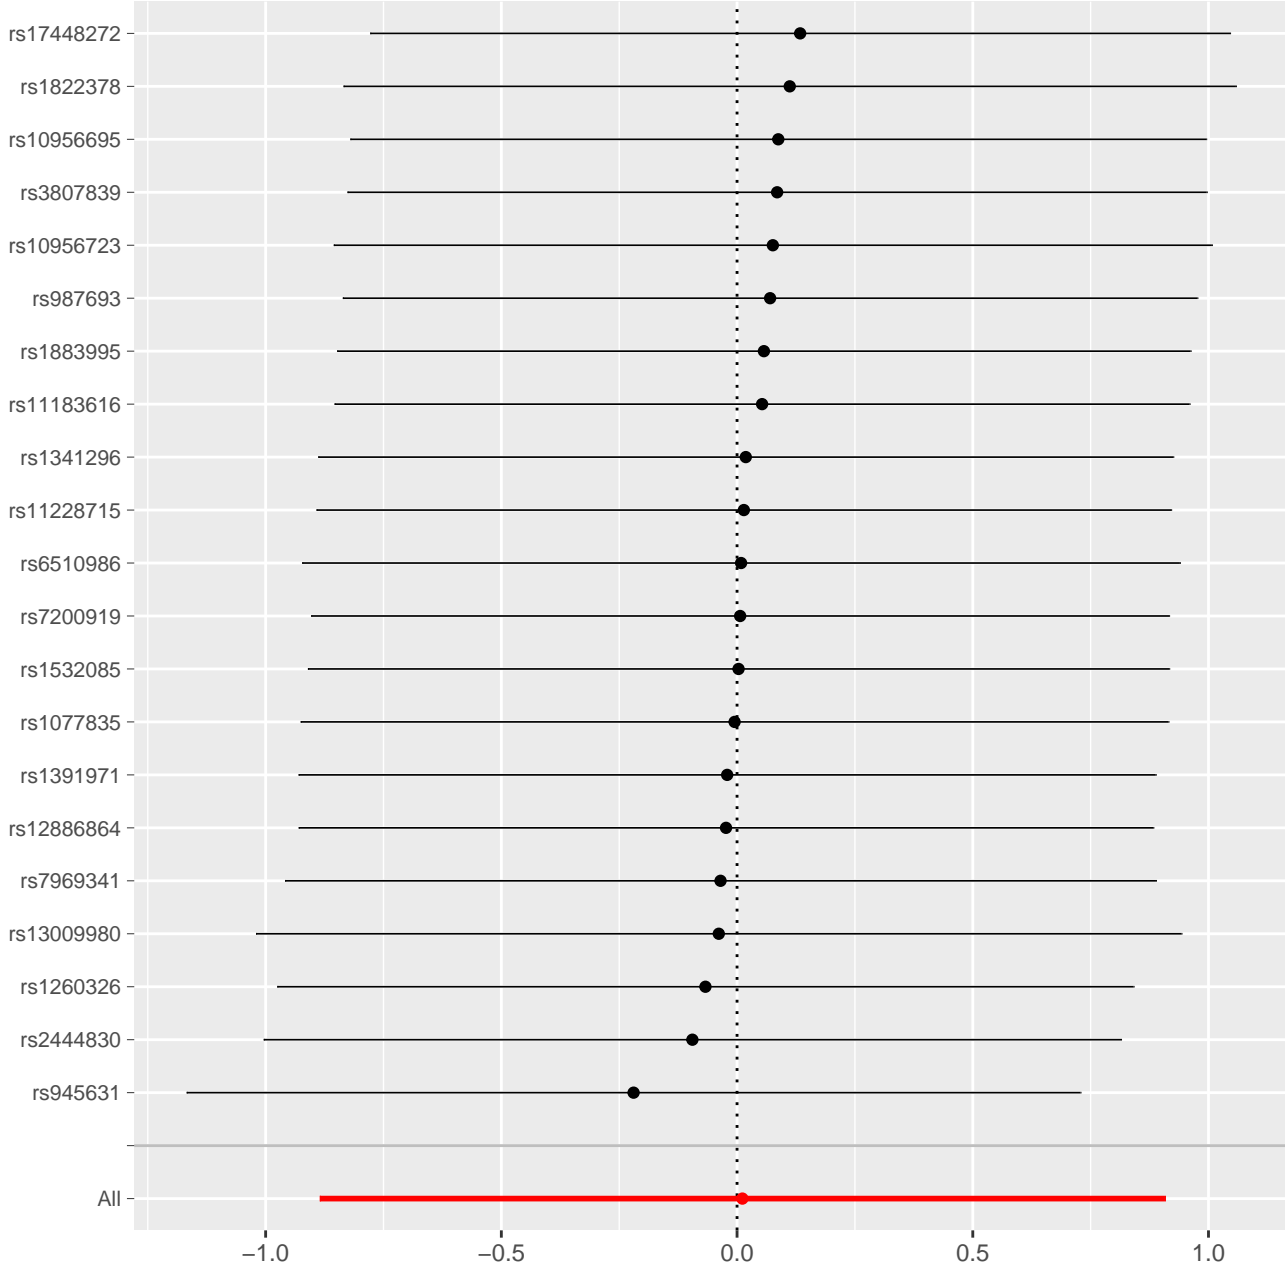

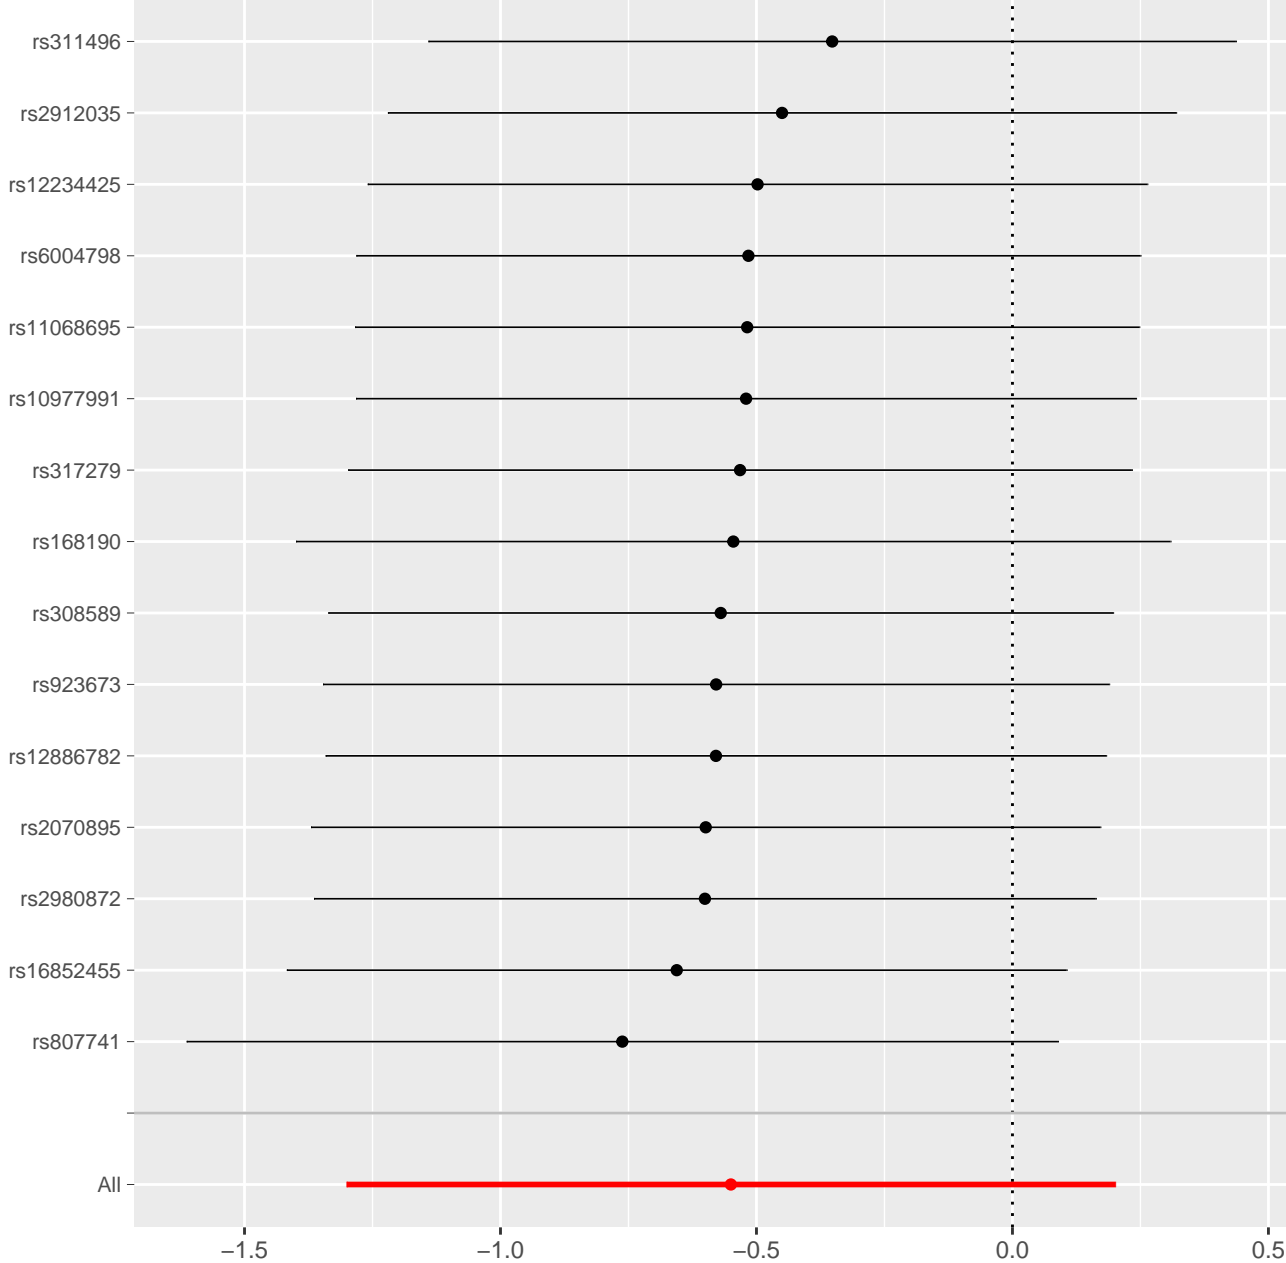

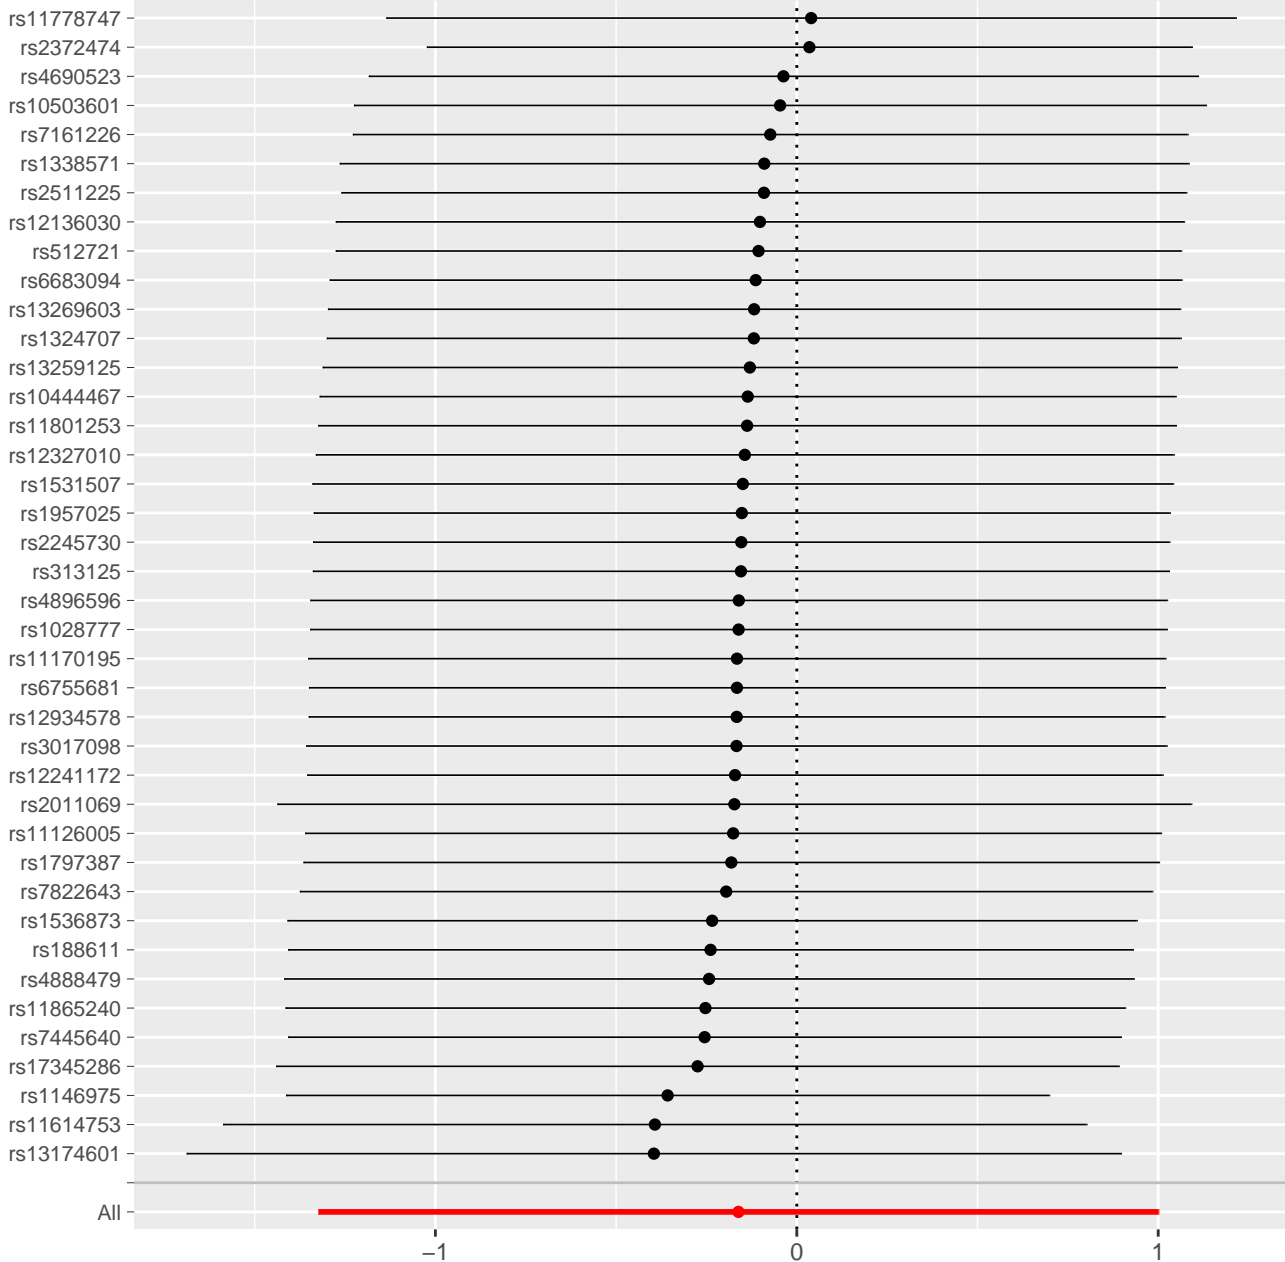

MR leave-one-out sensitivity analysis for 'M34283.metal.pos.txt.gz' on 'JUVEN\_ARTHR.gz'

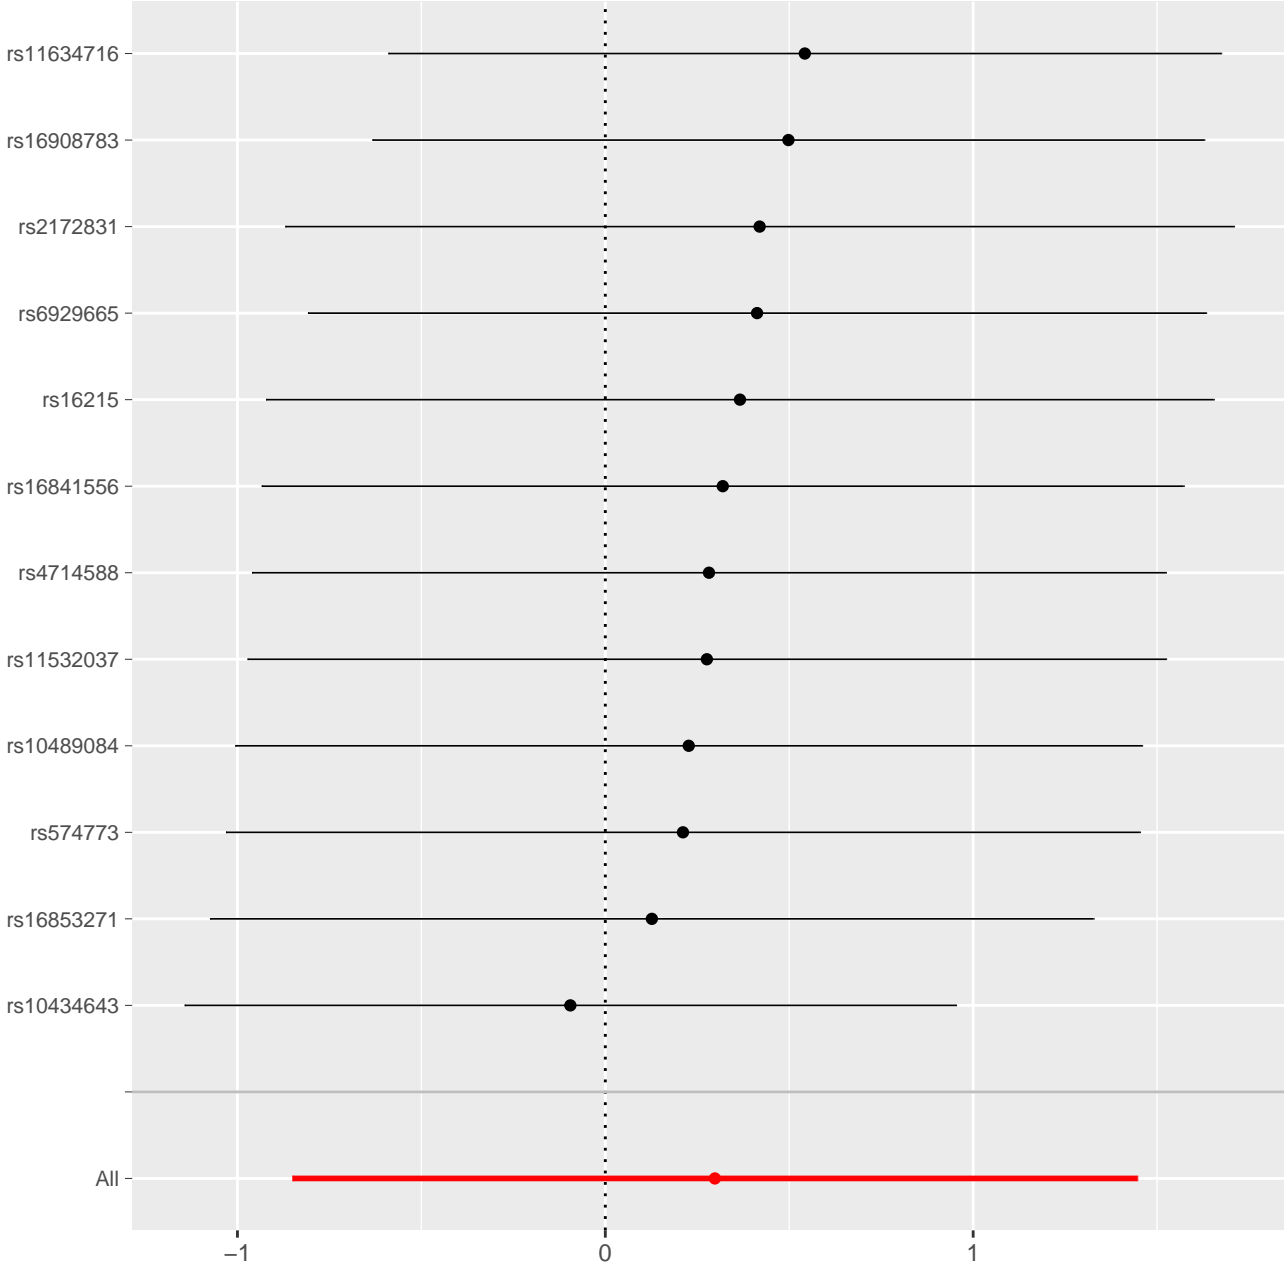

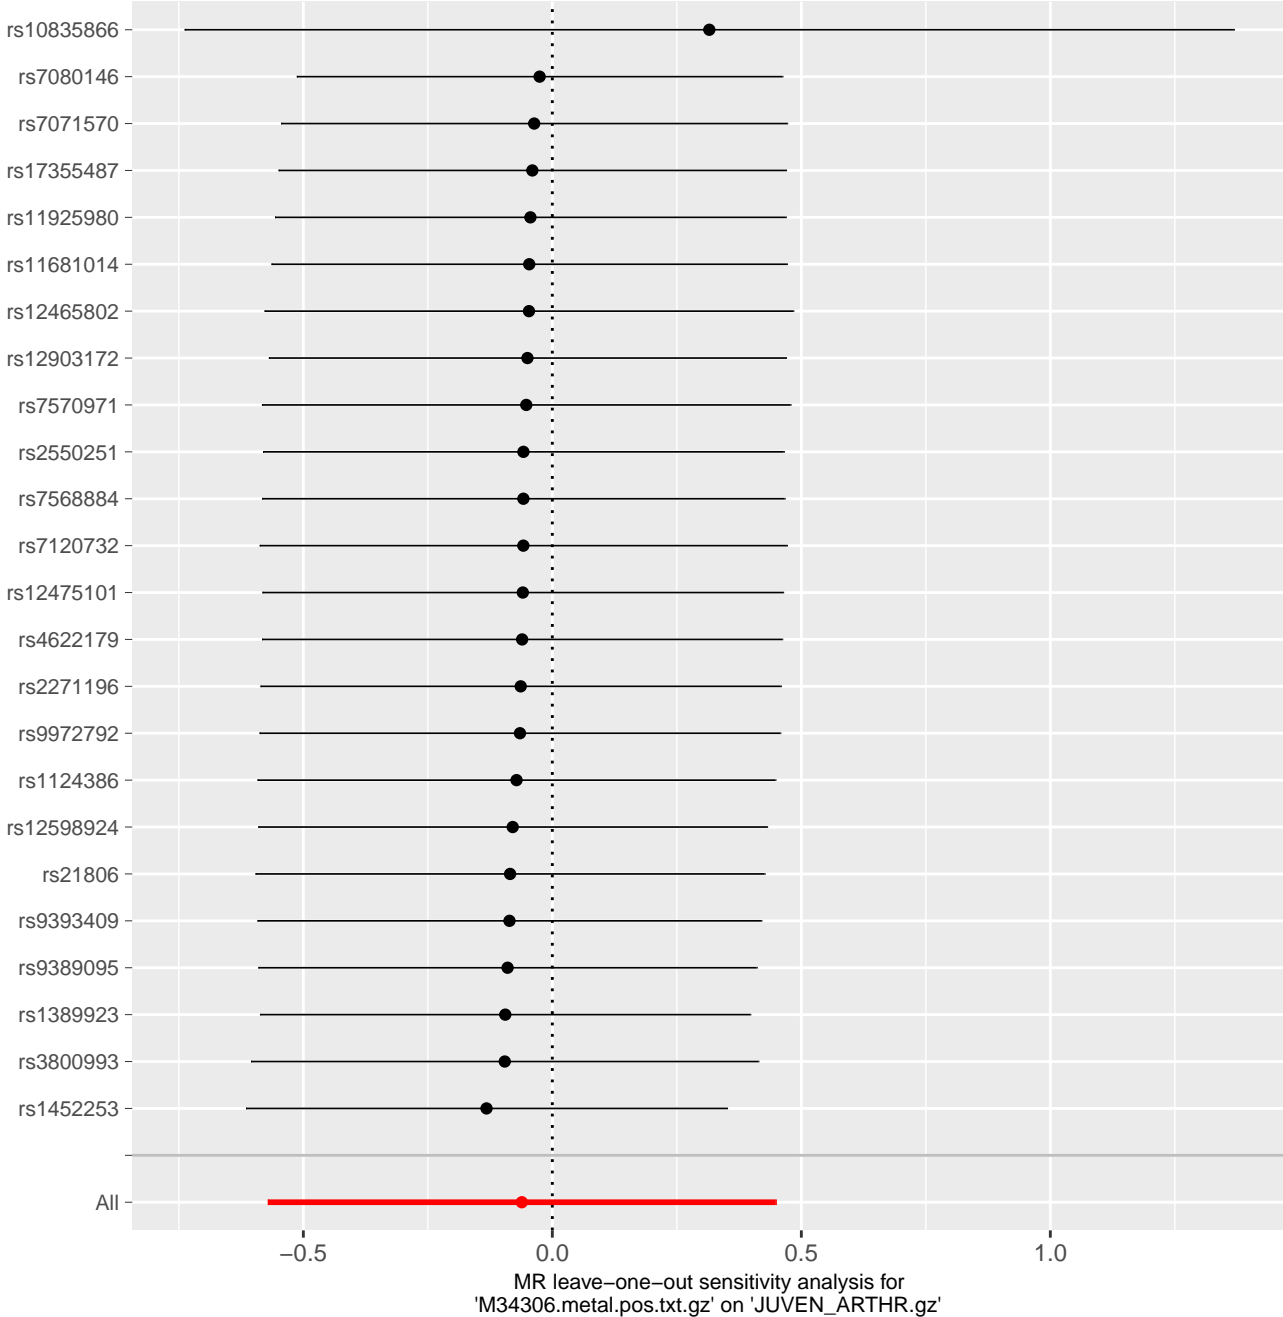

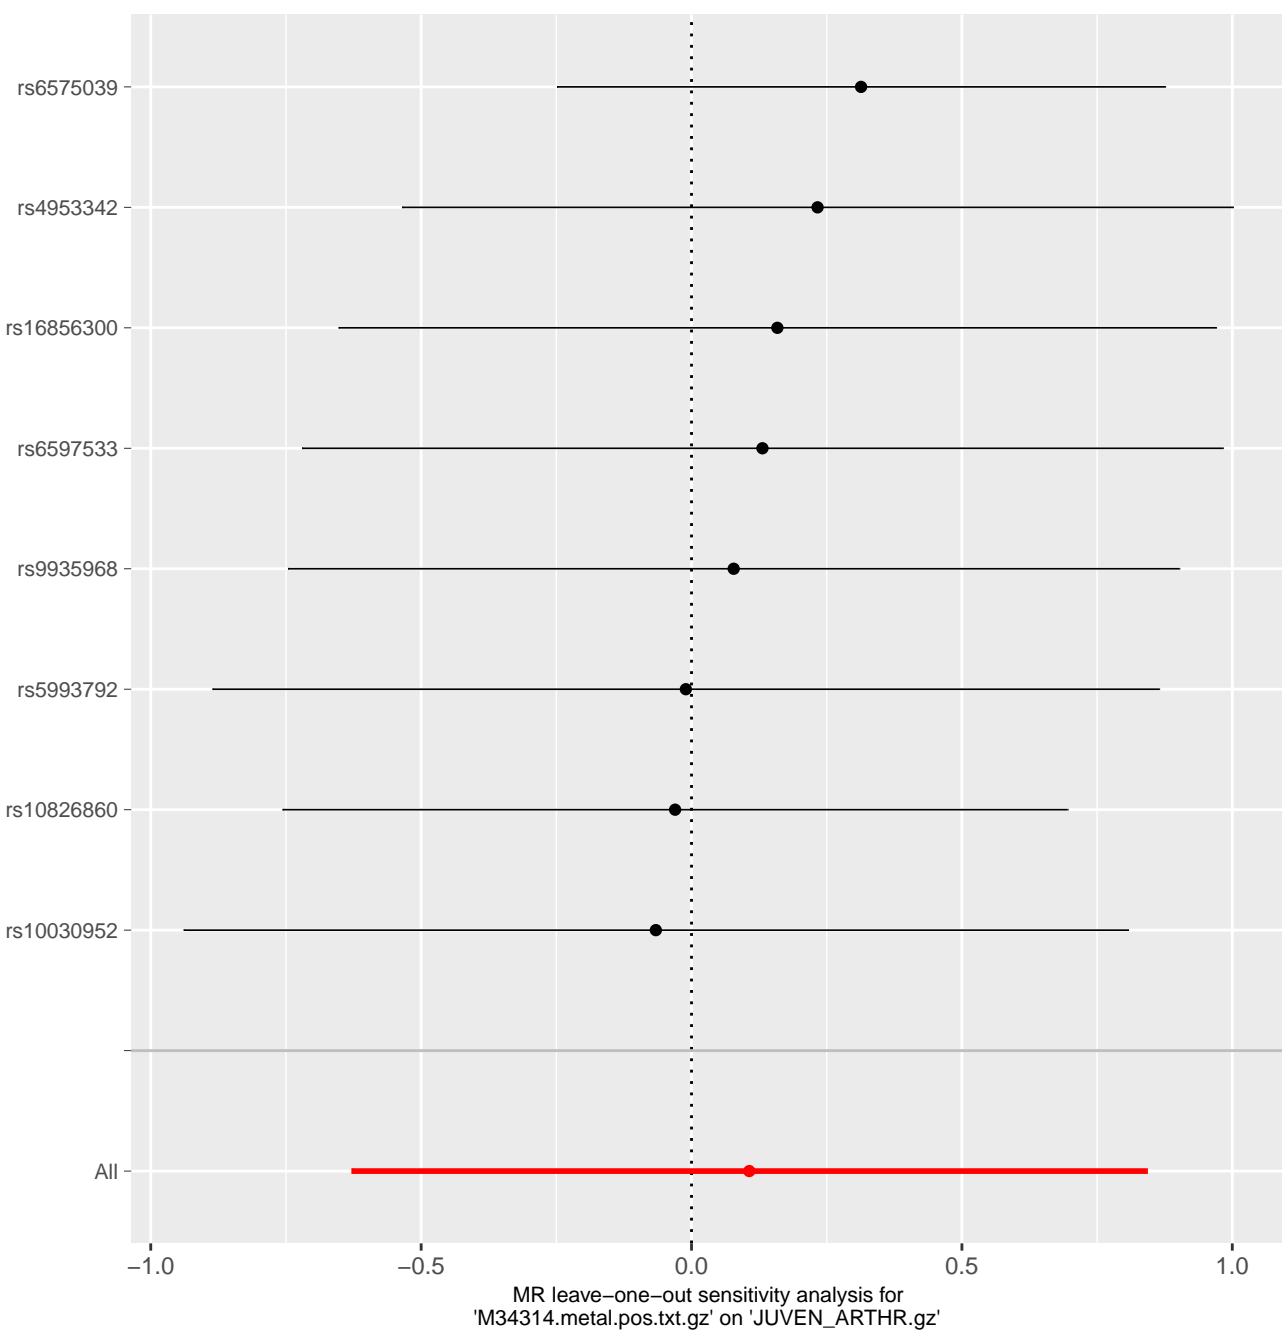



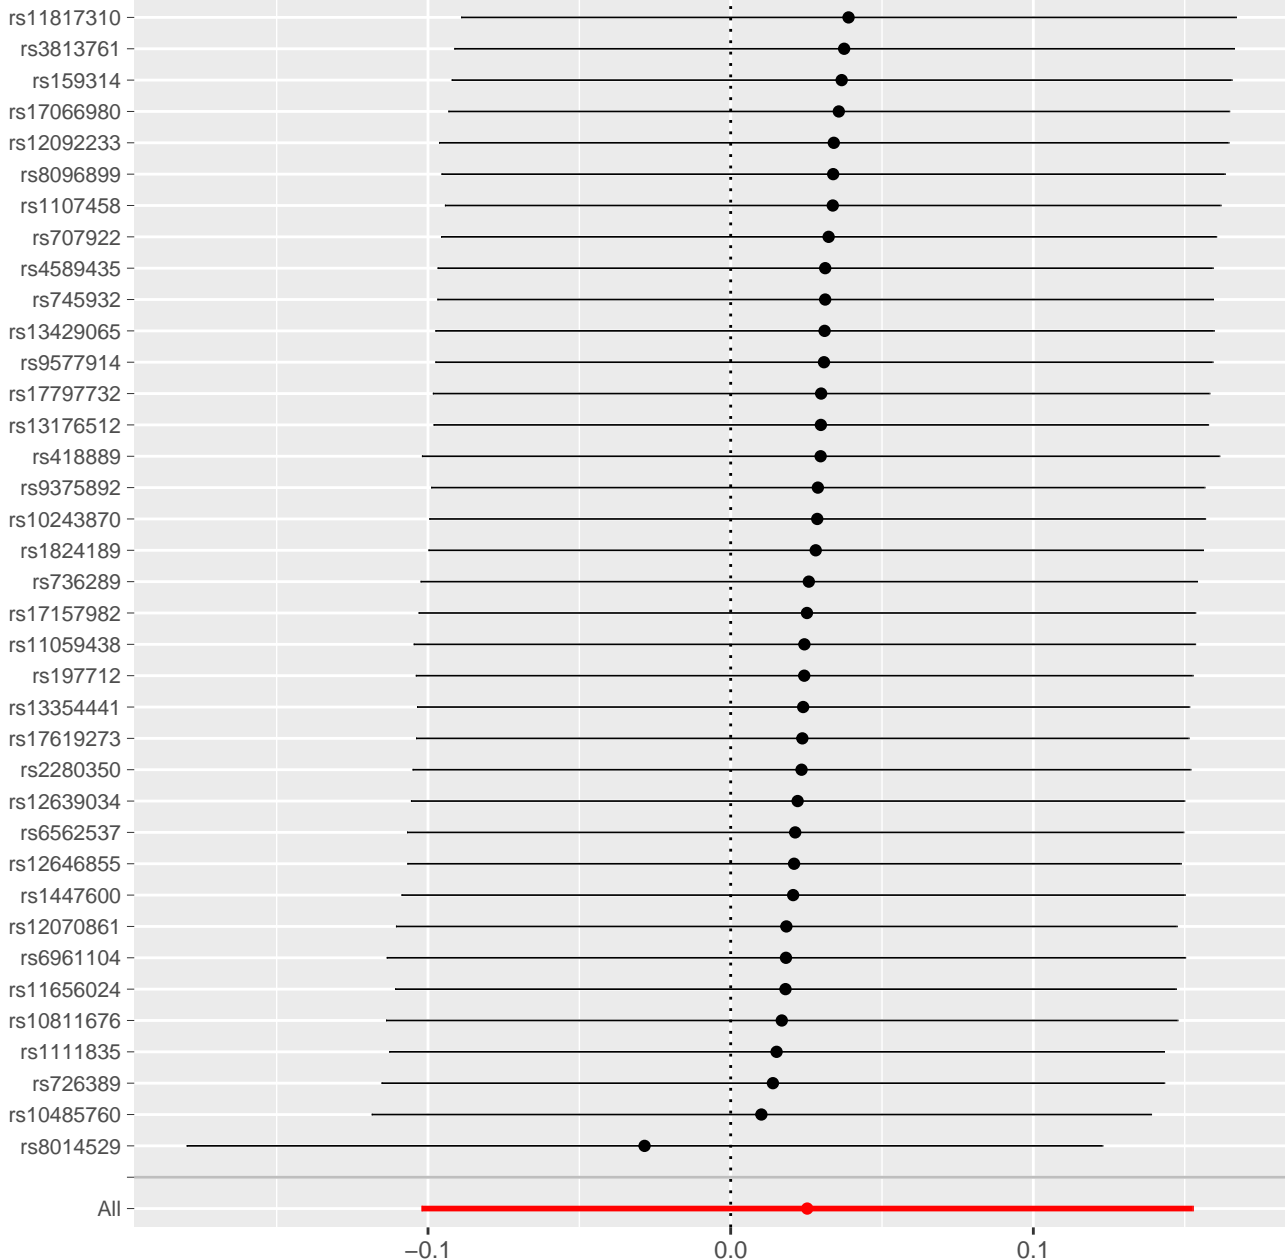

MR leave-one-out sensitivity analysis for 'M34322.metal.pos.txt.gz' on 'JUVEN\_ARTHR.gz'

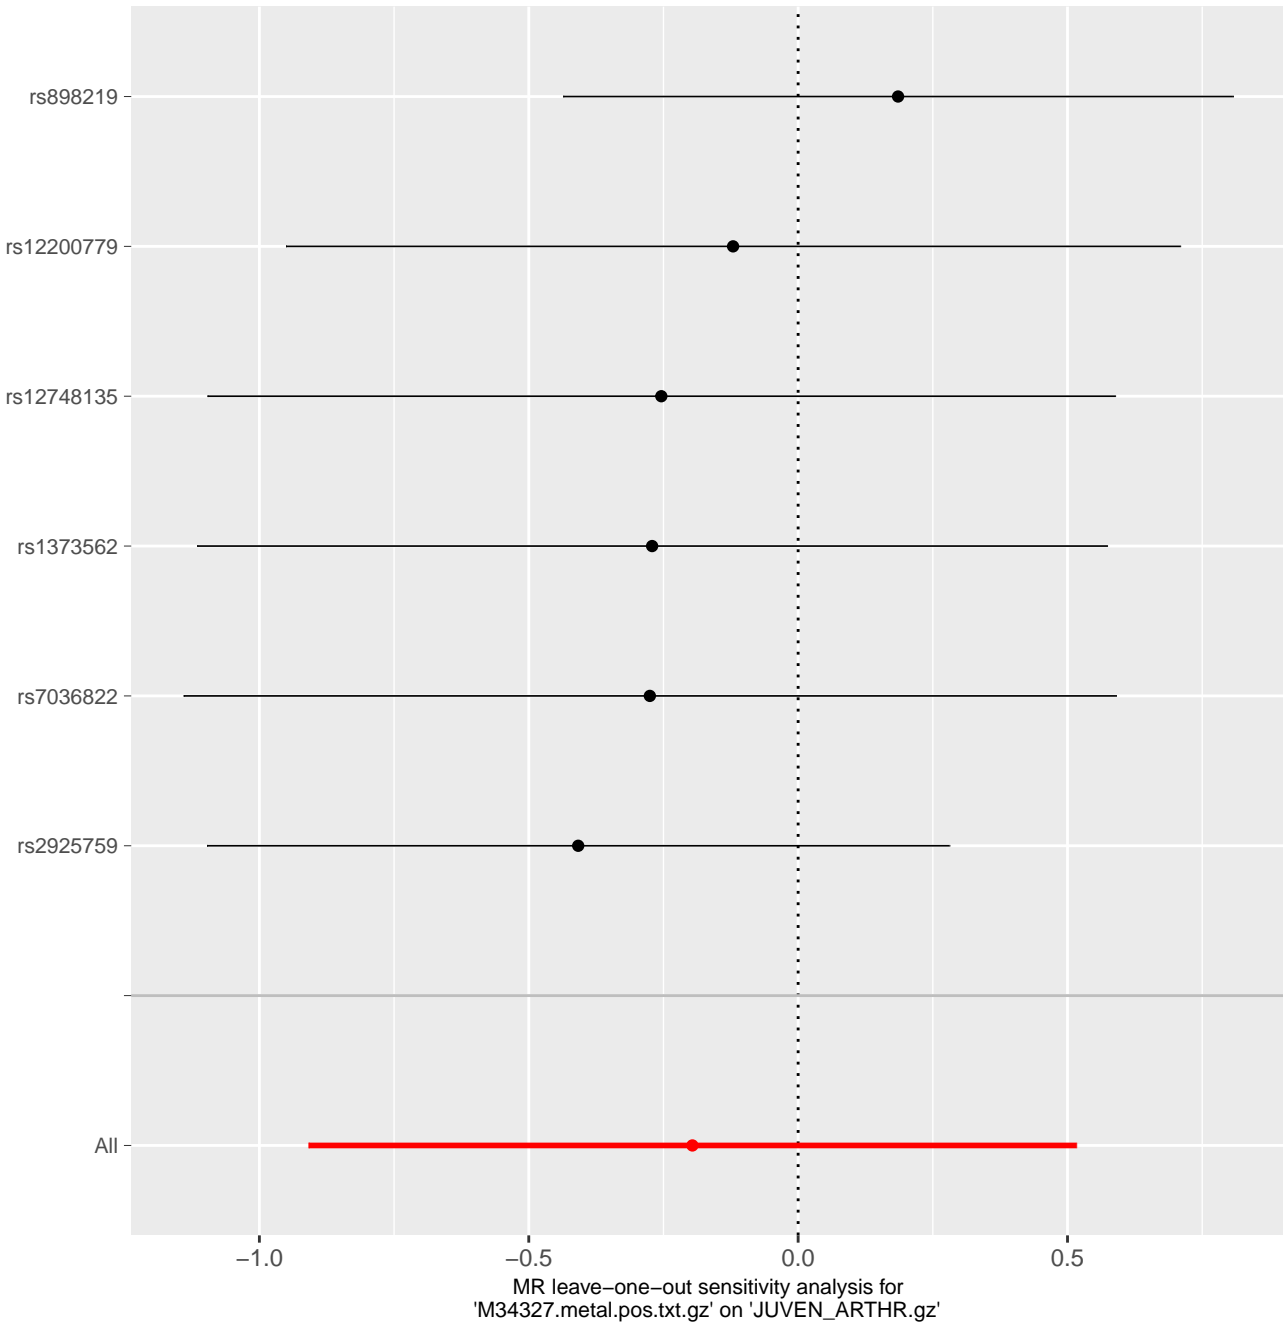

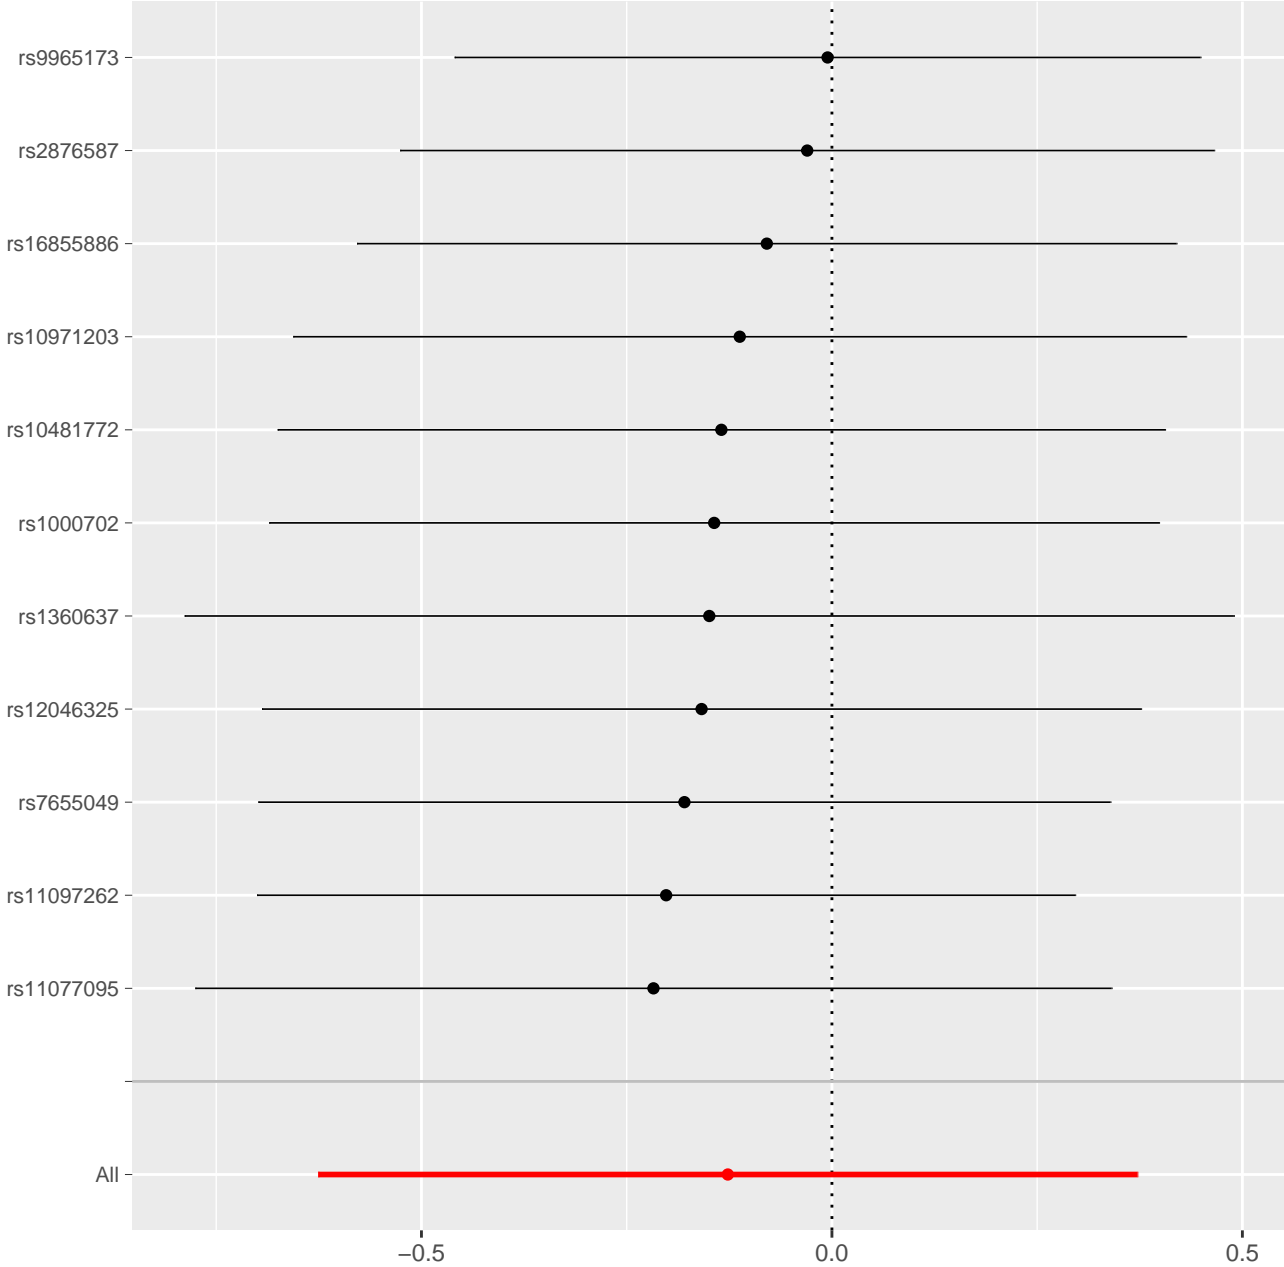

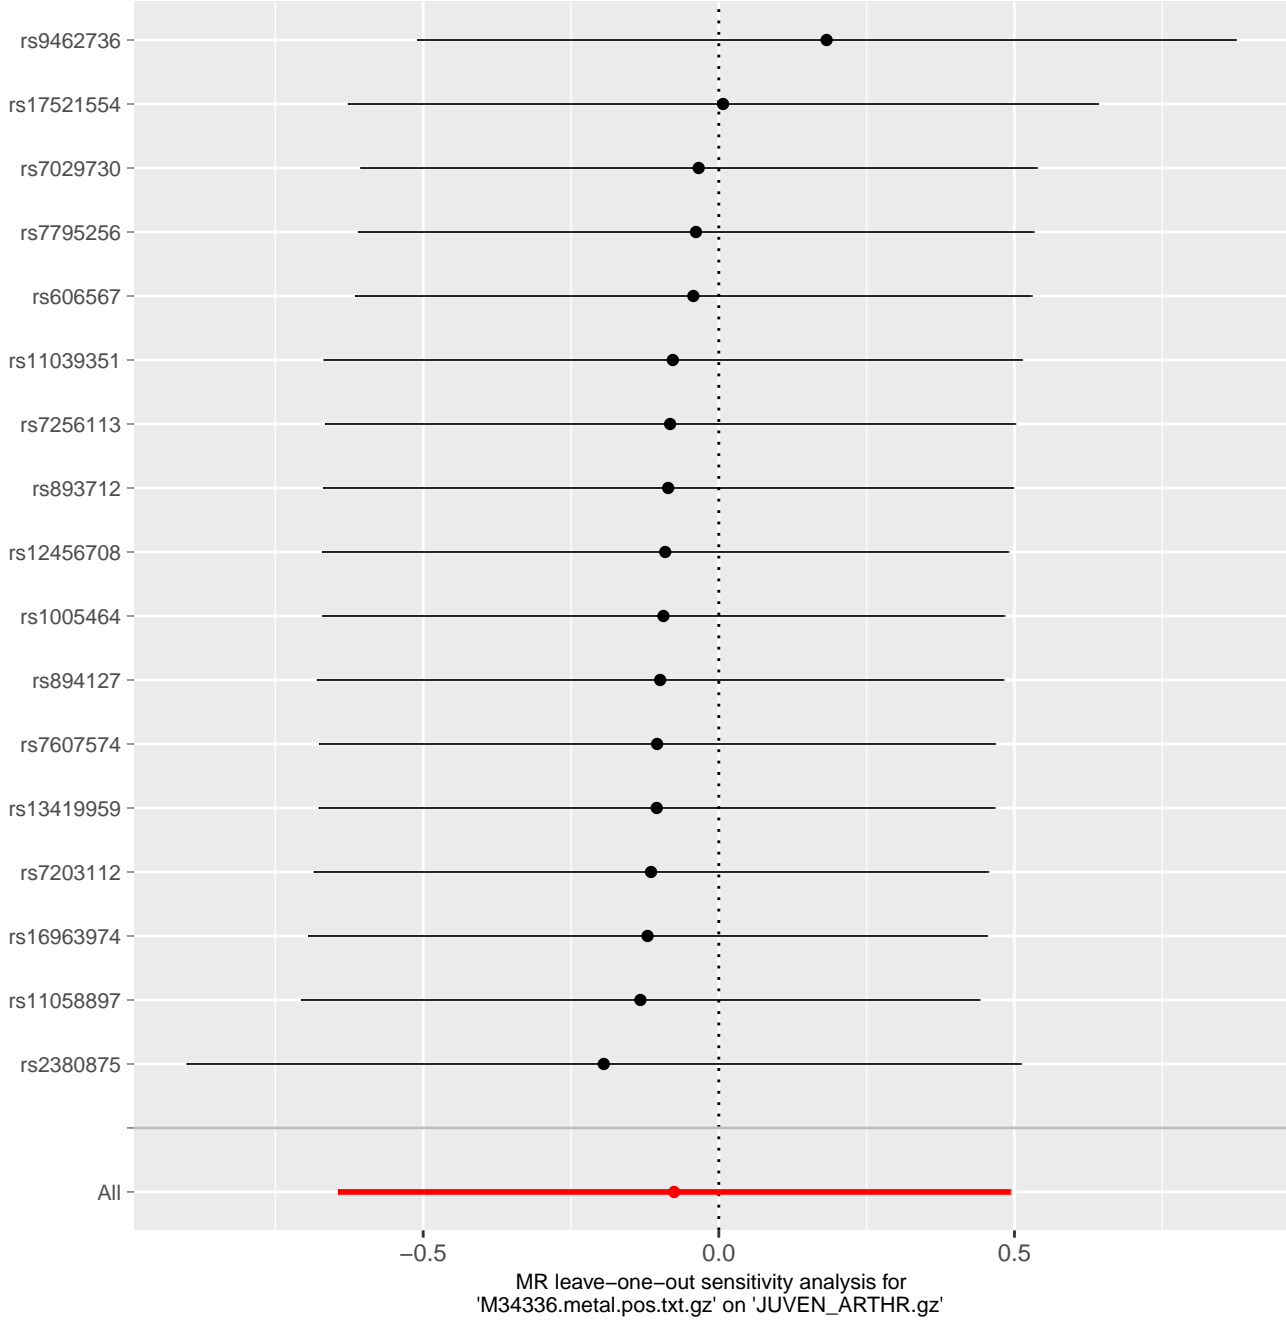

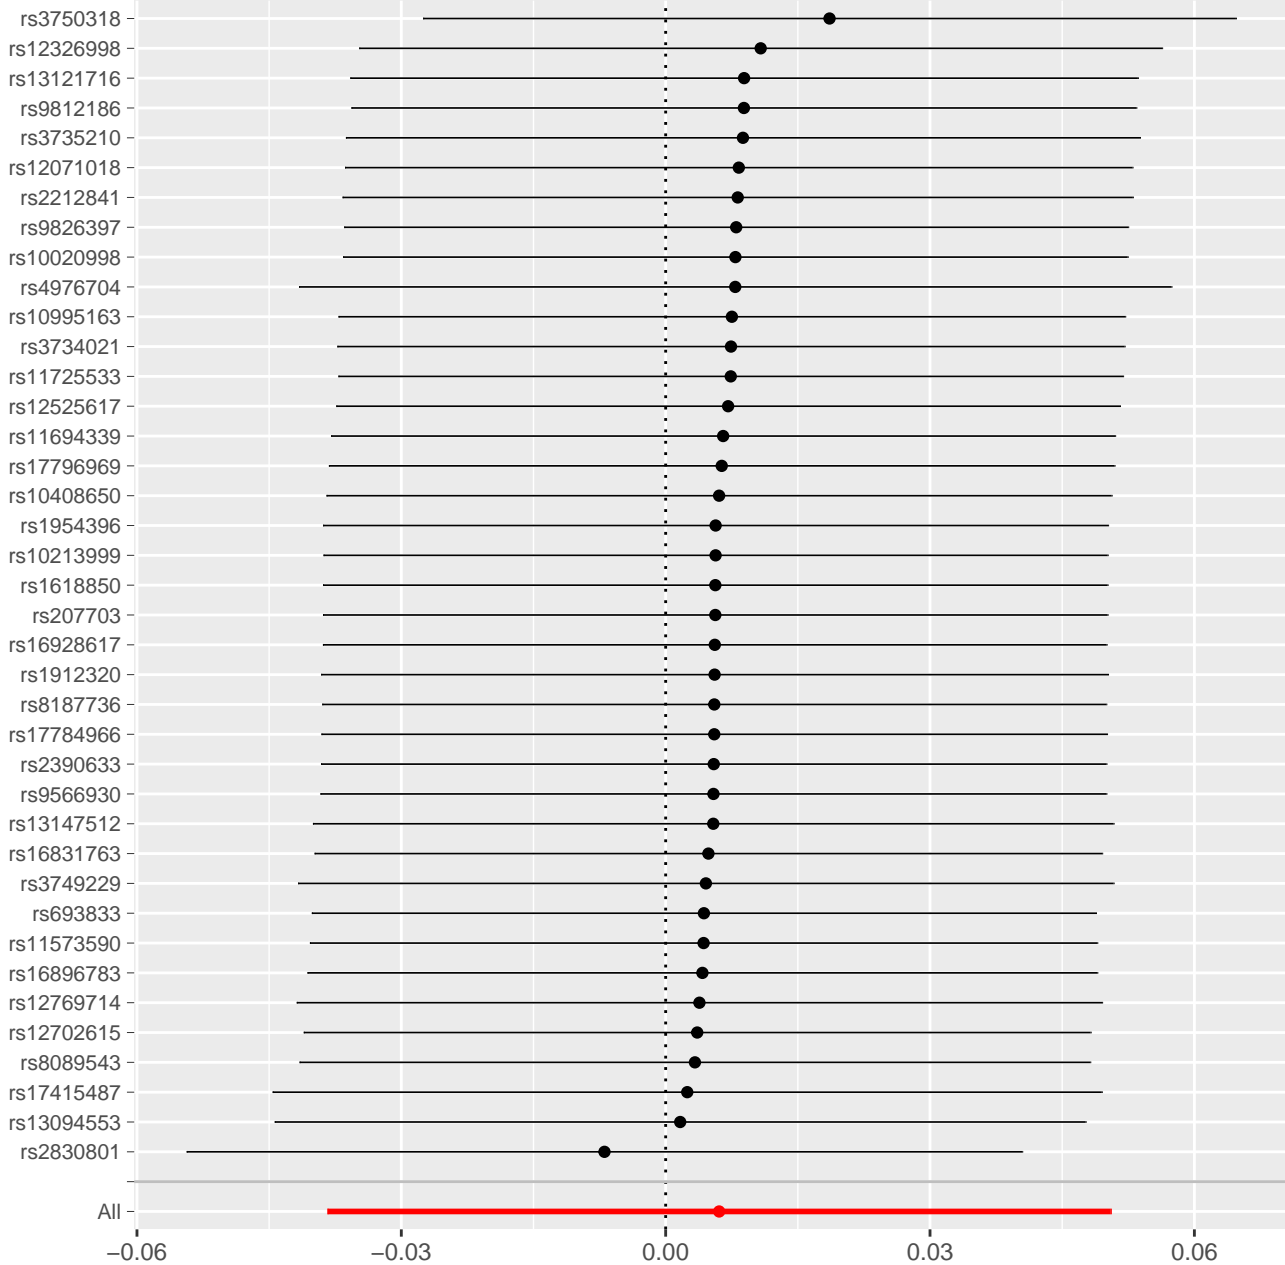

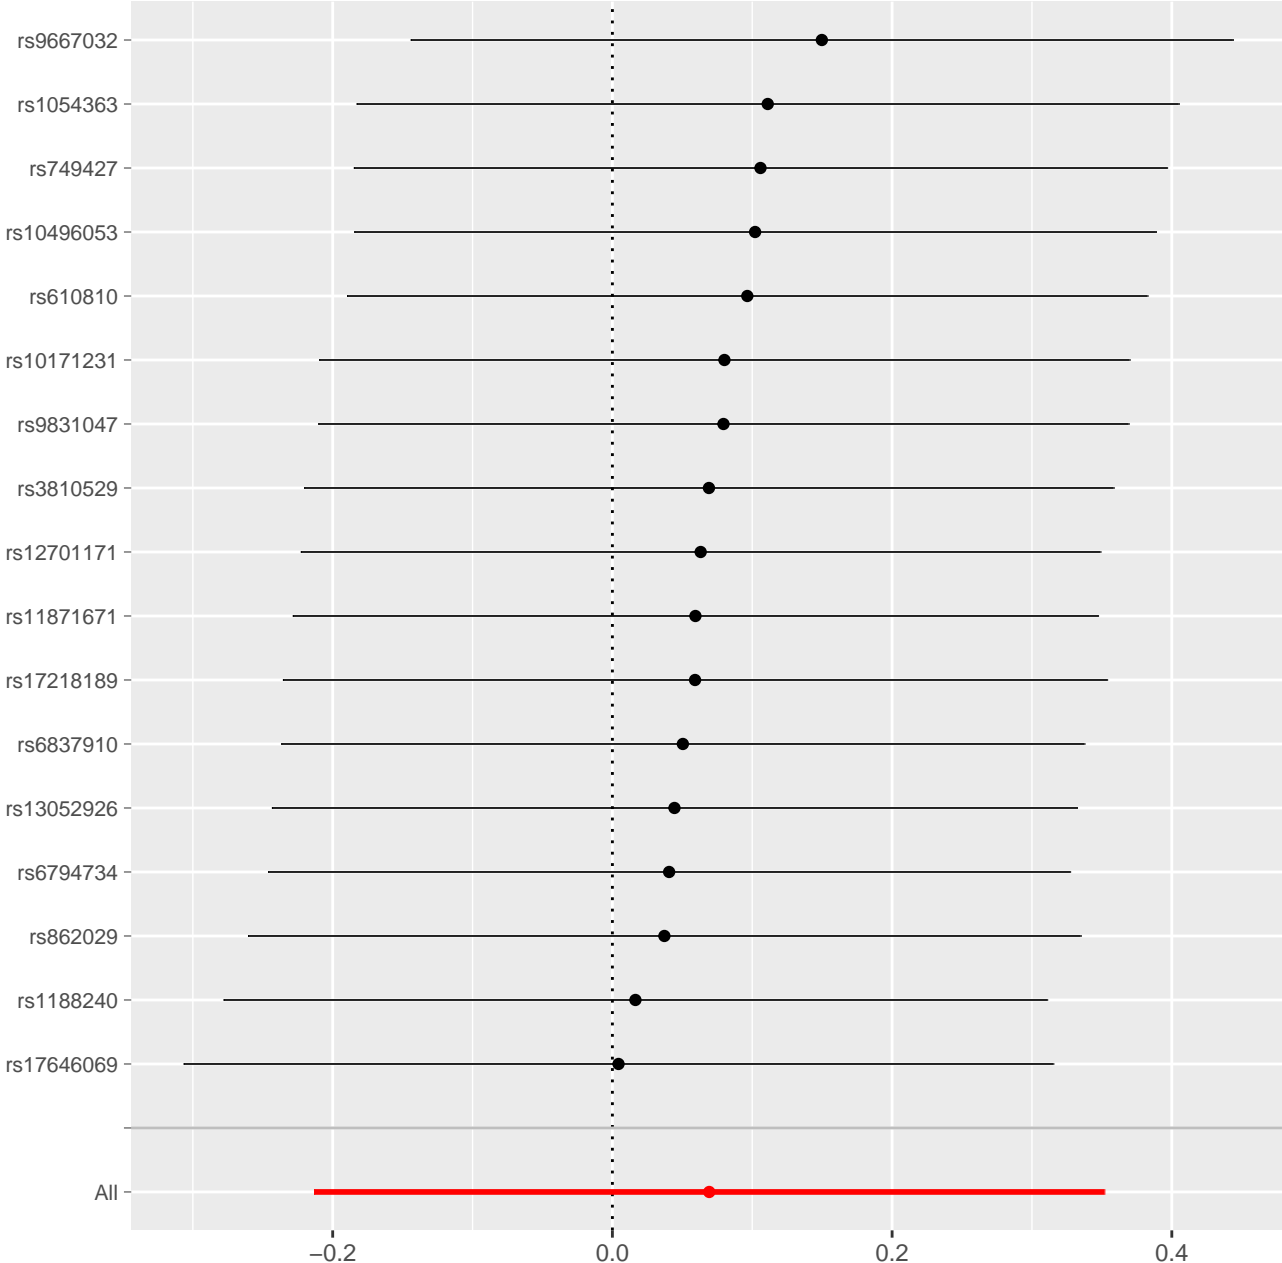

MR leave-one-out sensitivity analysis for 'M34339.metal.pos.txt.gz' on 'JUVEN\_ARTHR.gz'

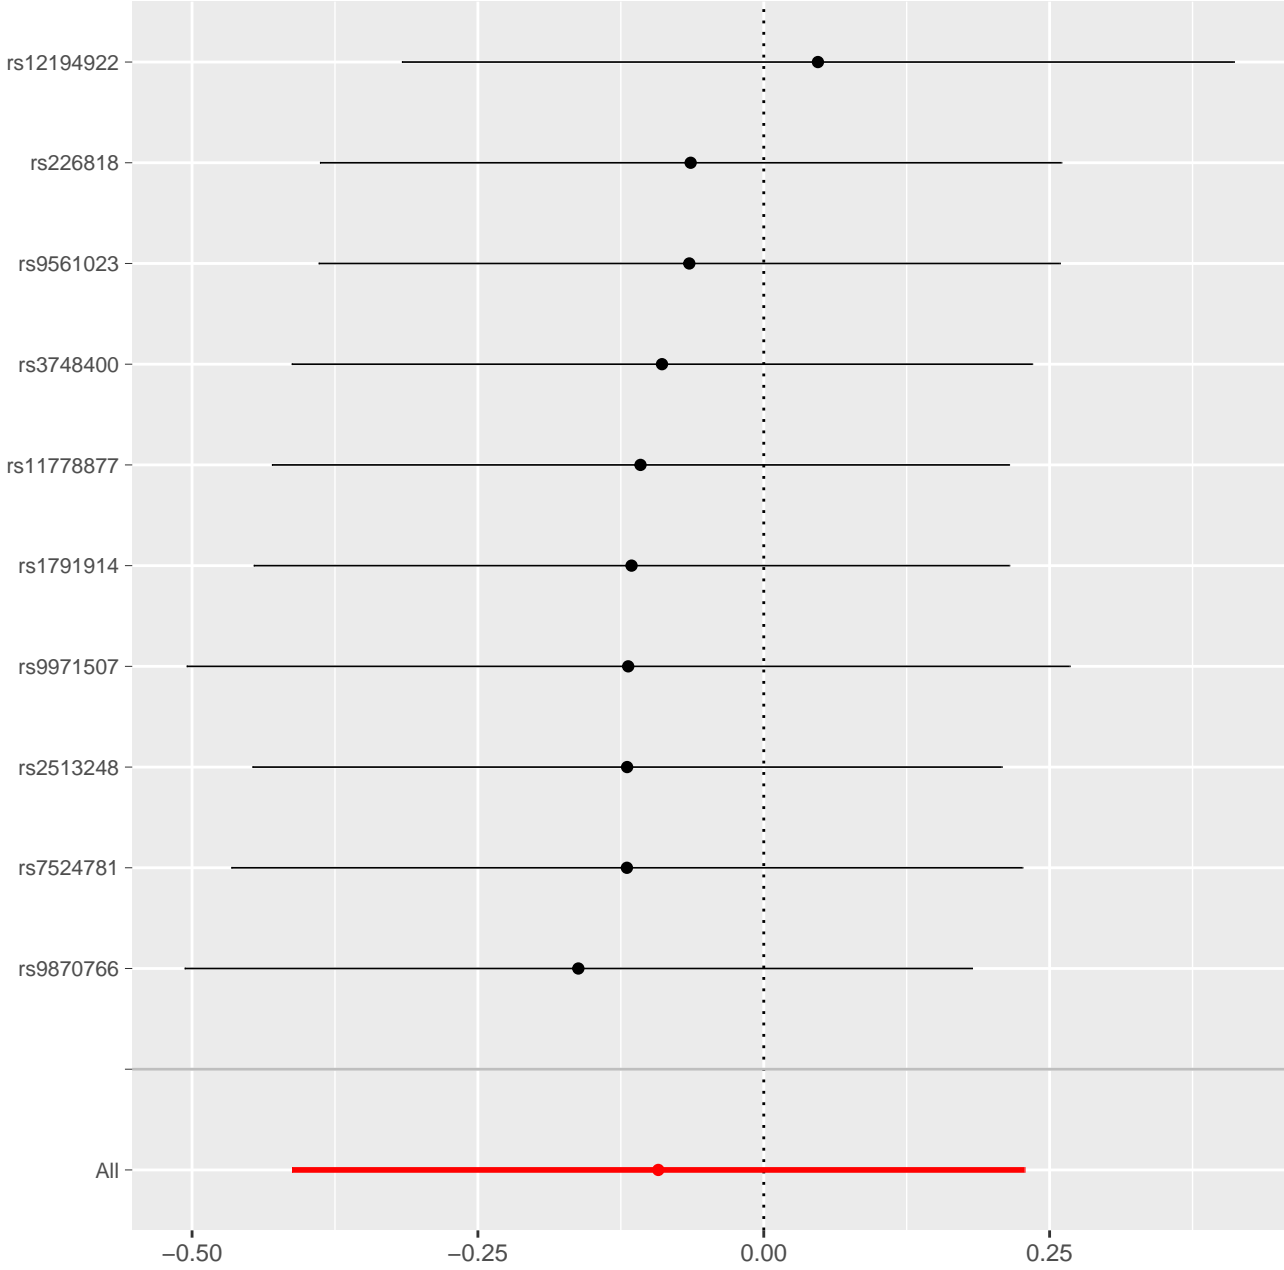

MR leave-one-out sensitivity analysis for 'M34344.metal.pos.txt.gz' on 'JUVEN\_ARTHR.gz'

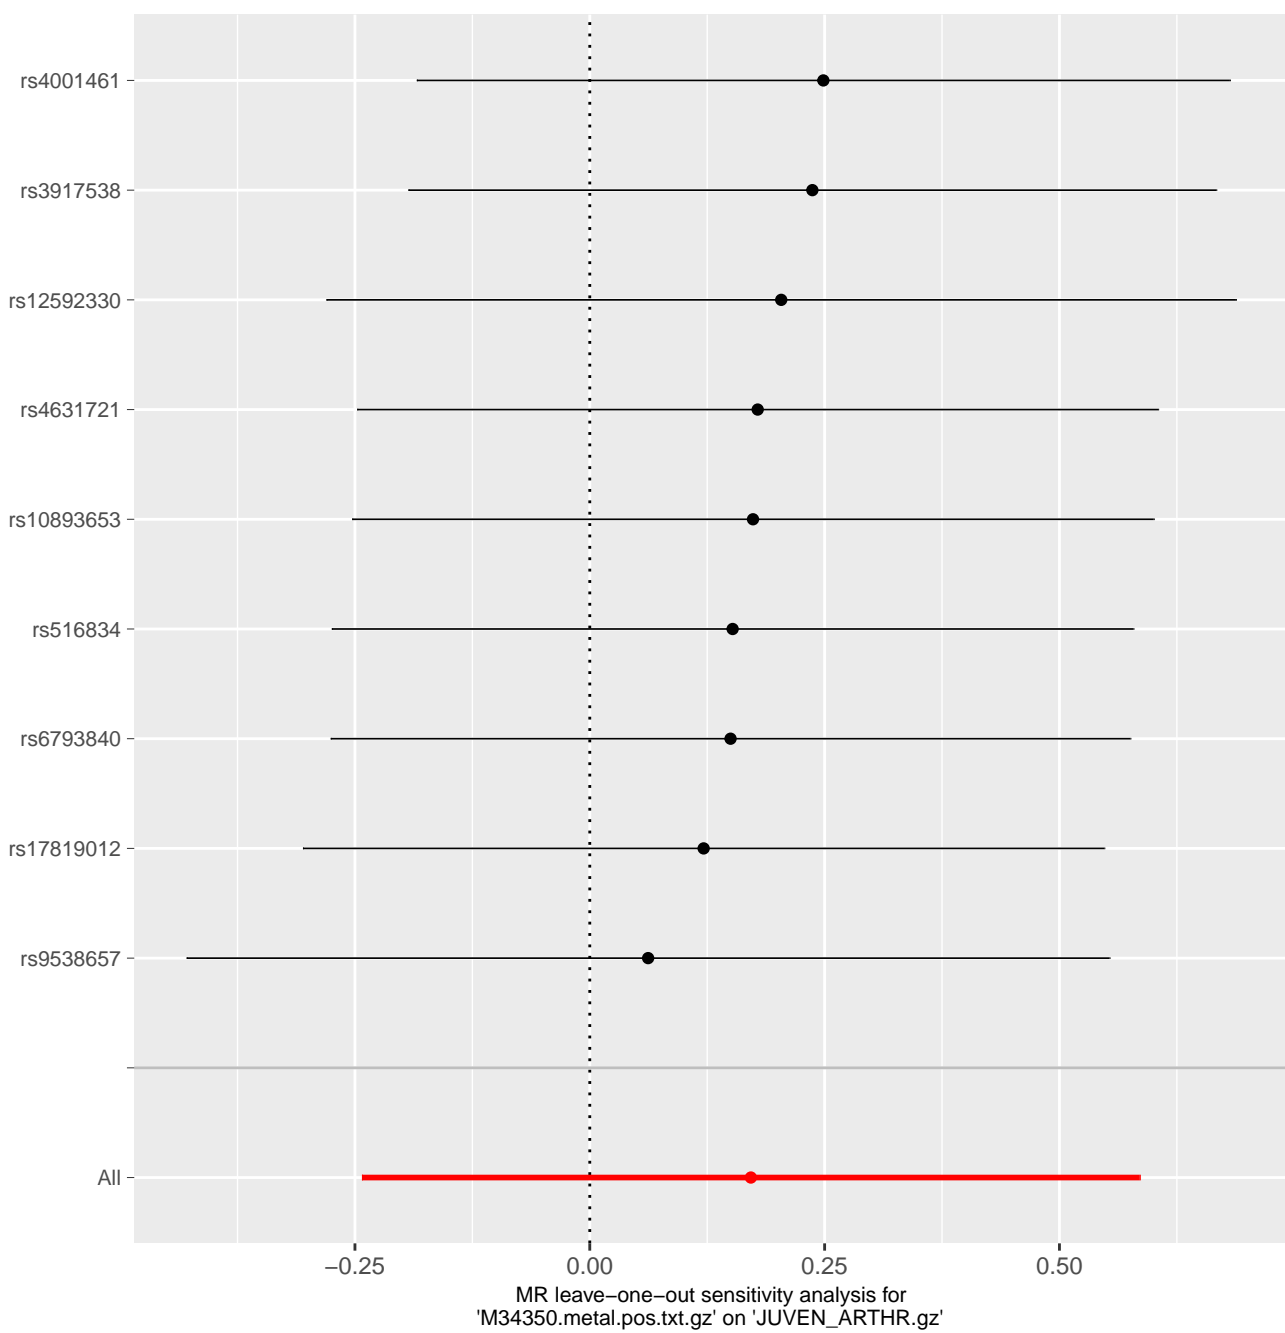



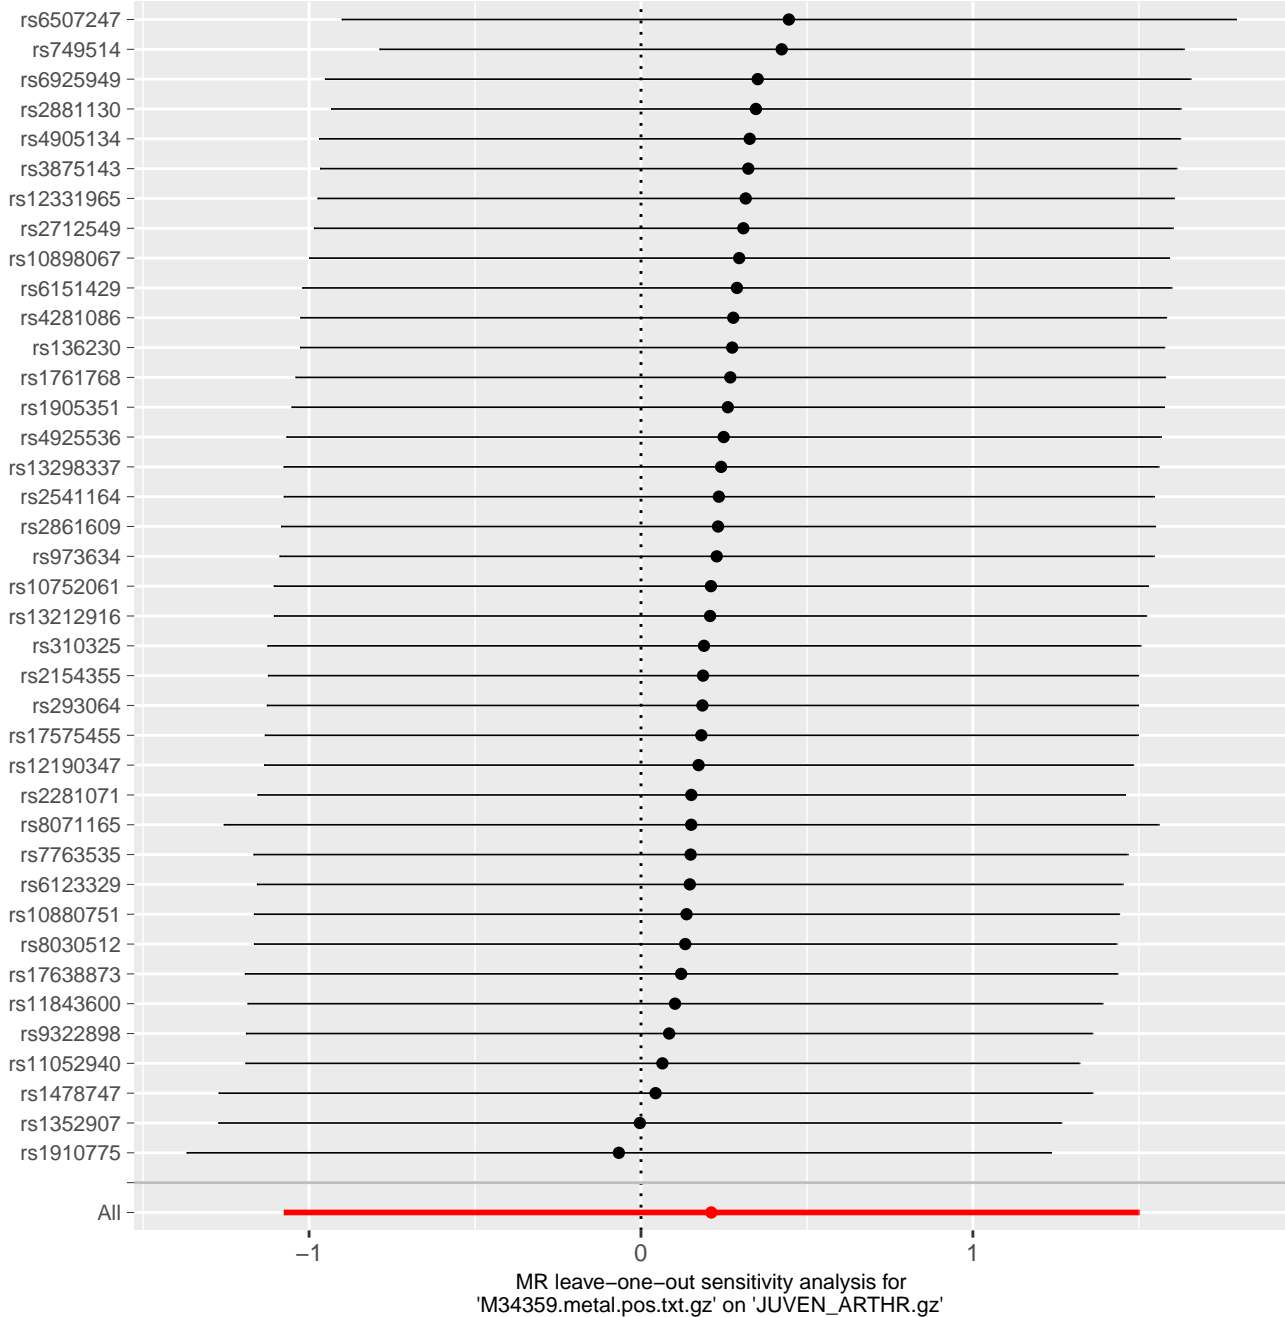

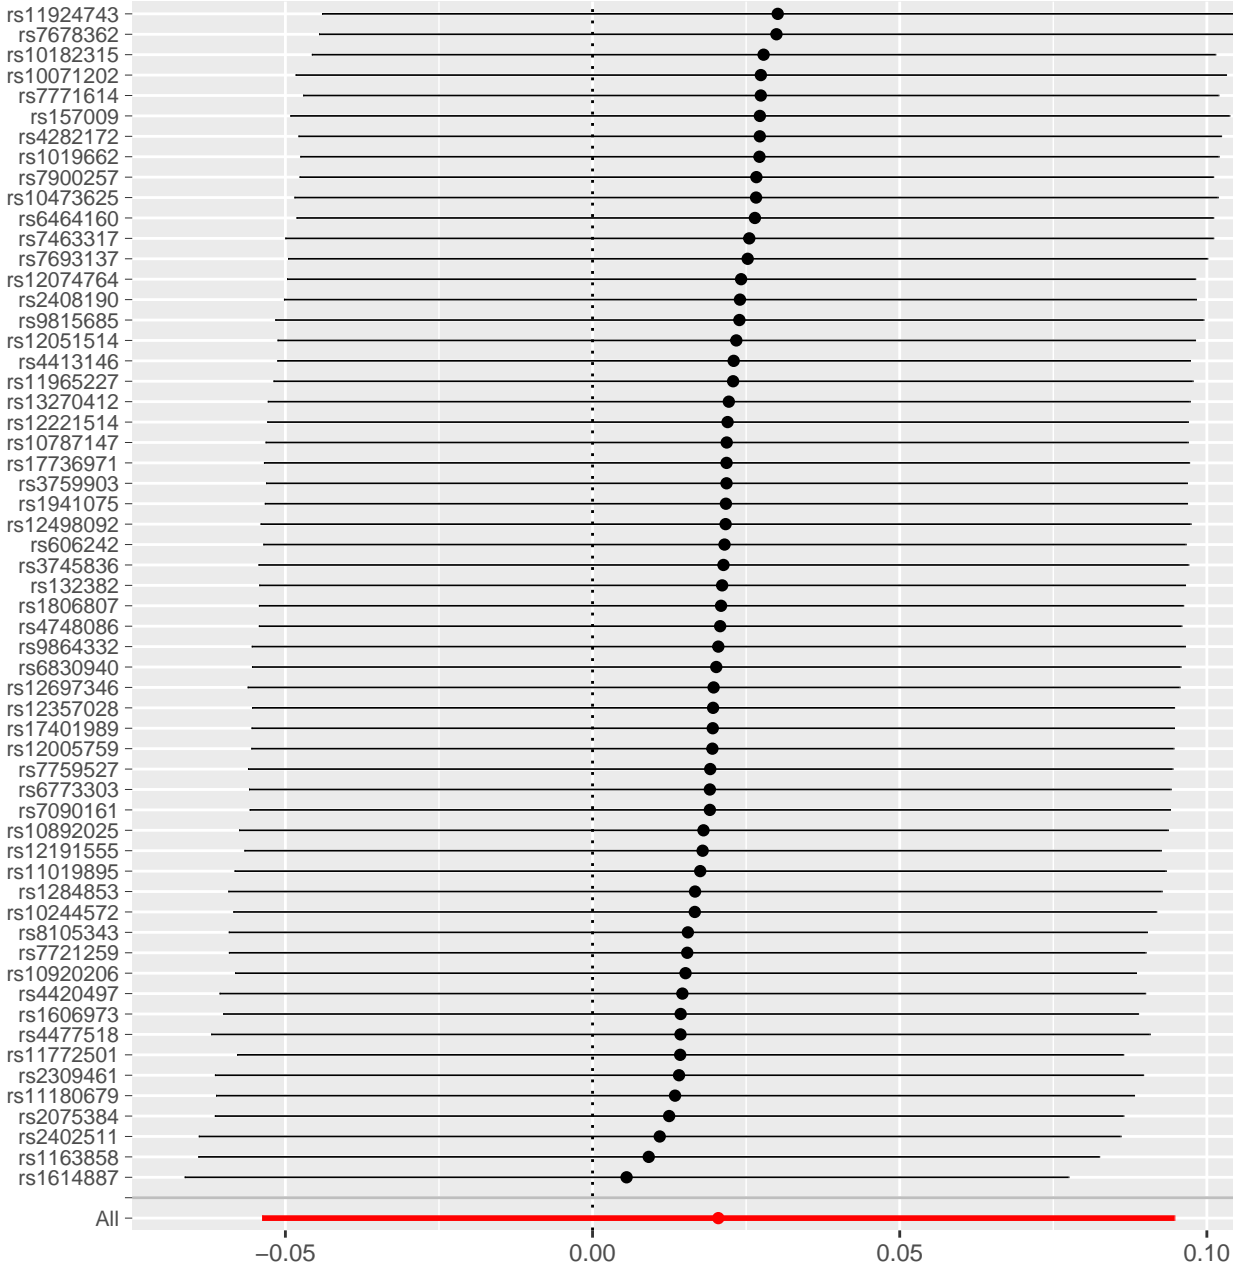

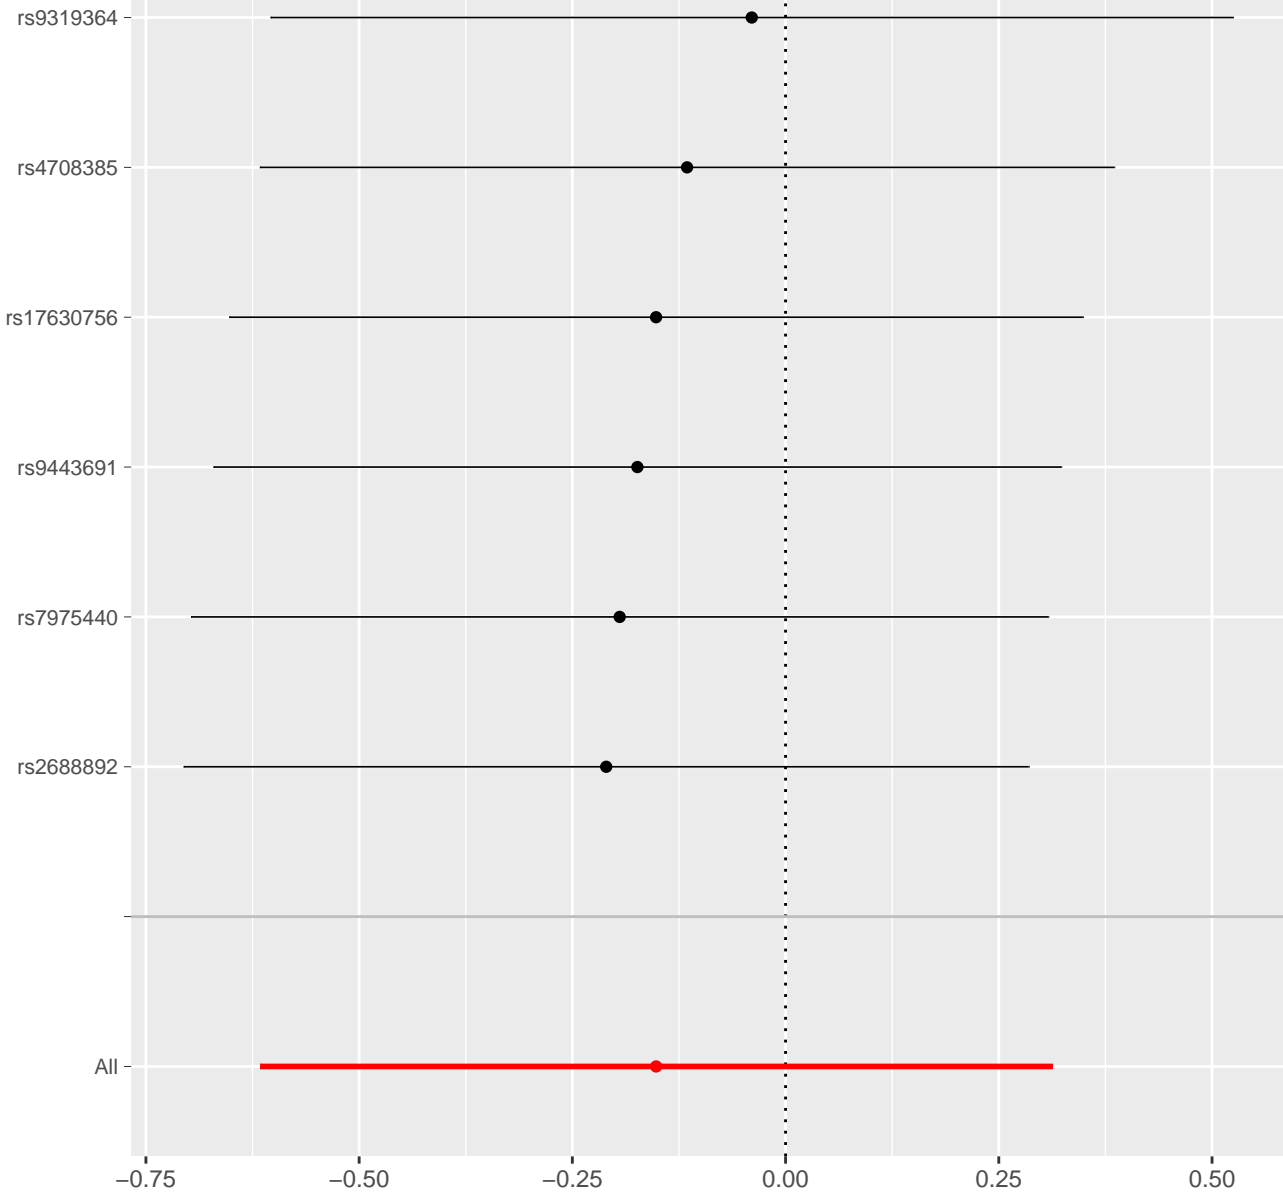

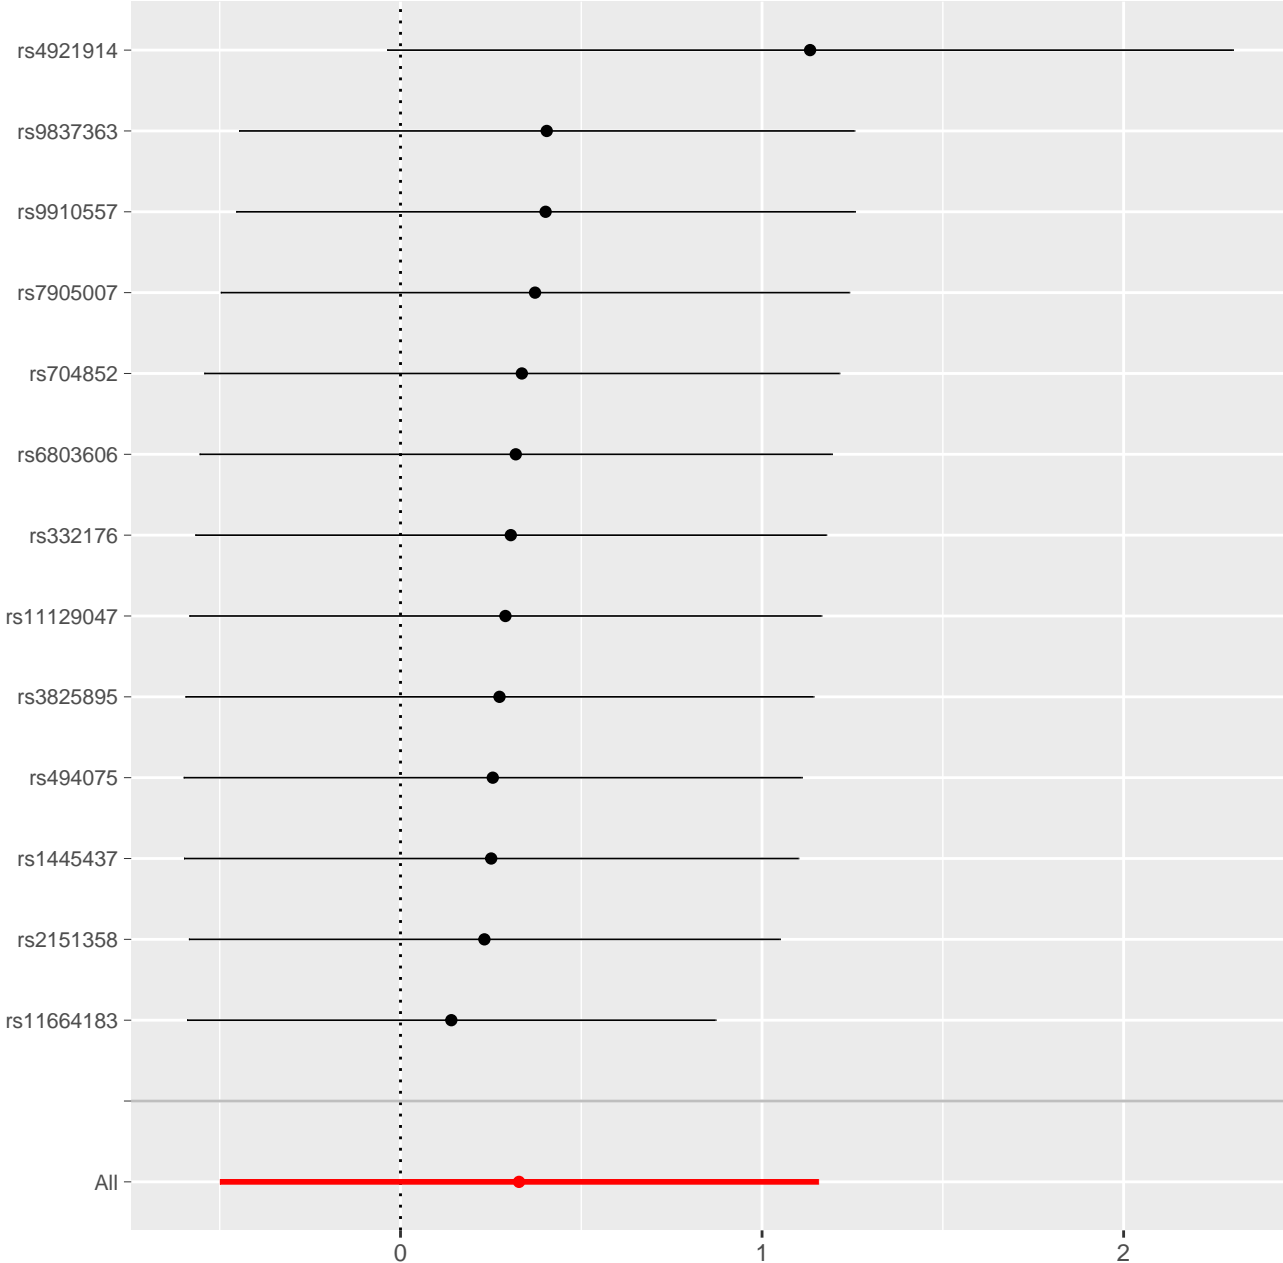

MR leave-one-out sensitivity analysis for 'M34389.metal.pos.txt.gz' on 'JUVEN\_ARTHR.gz'

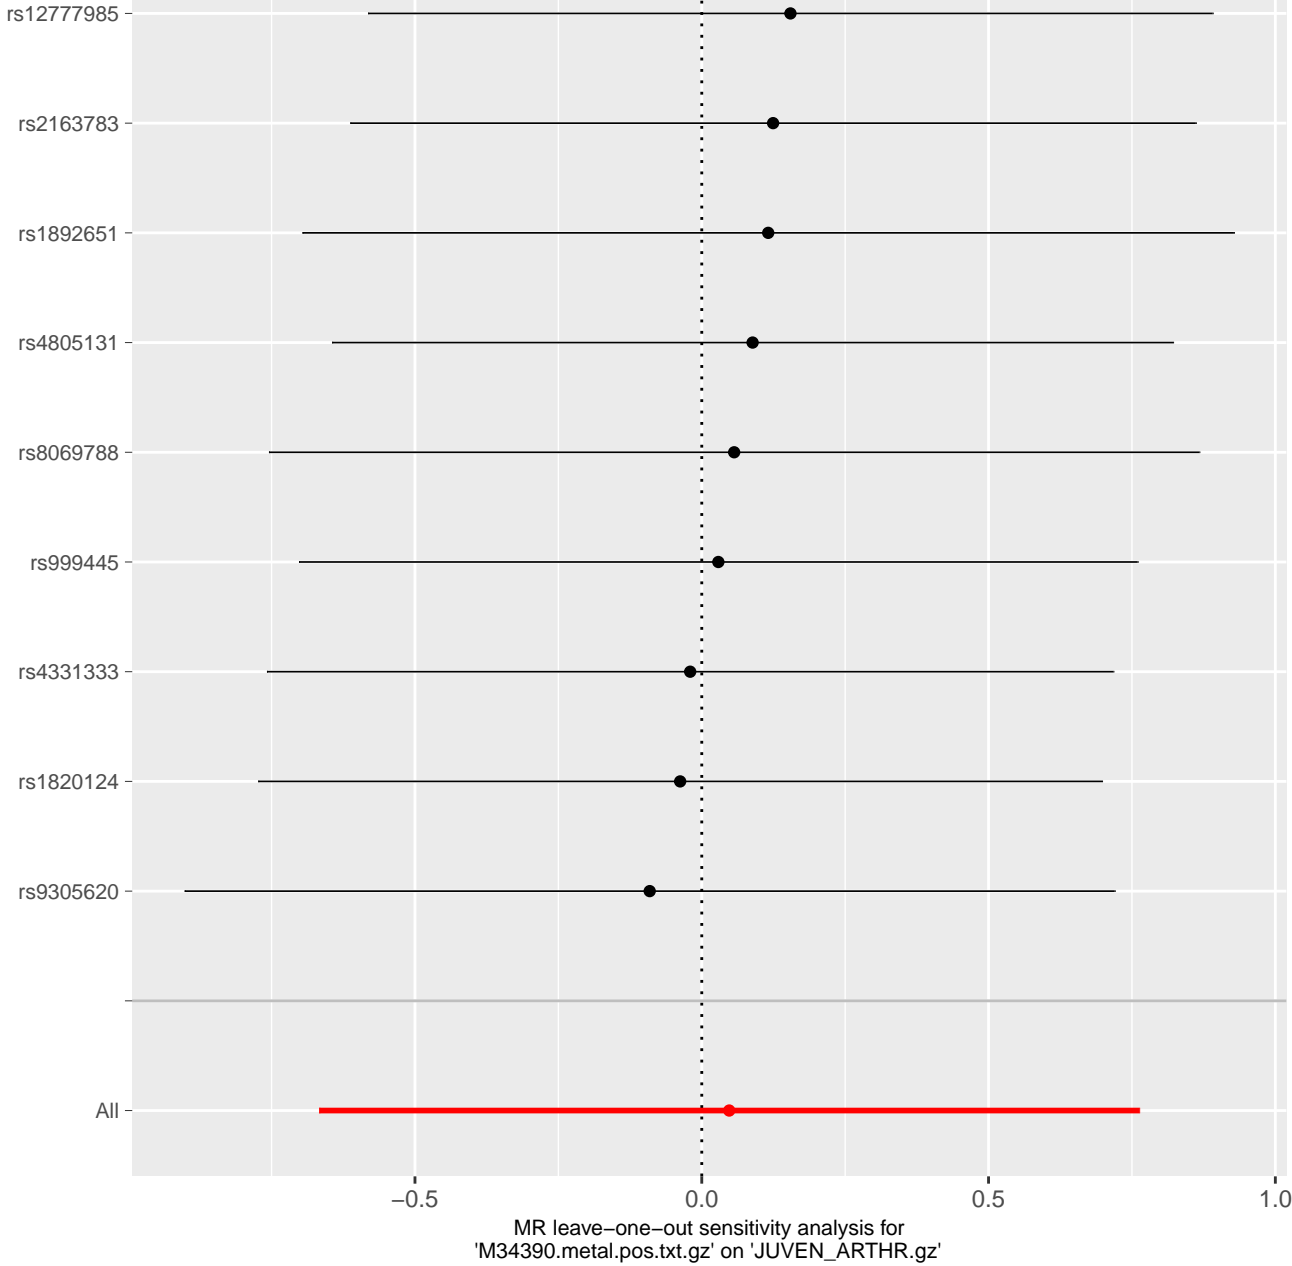

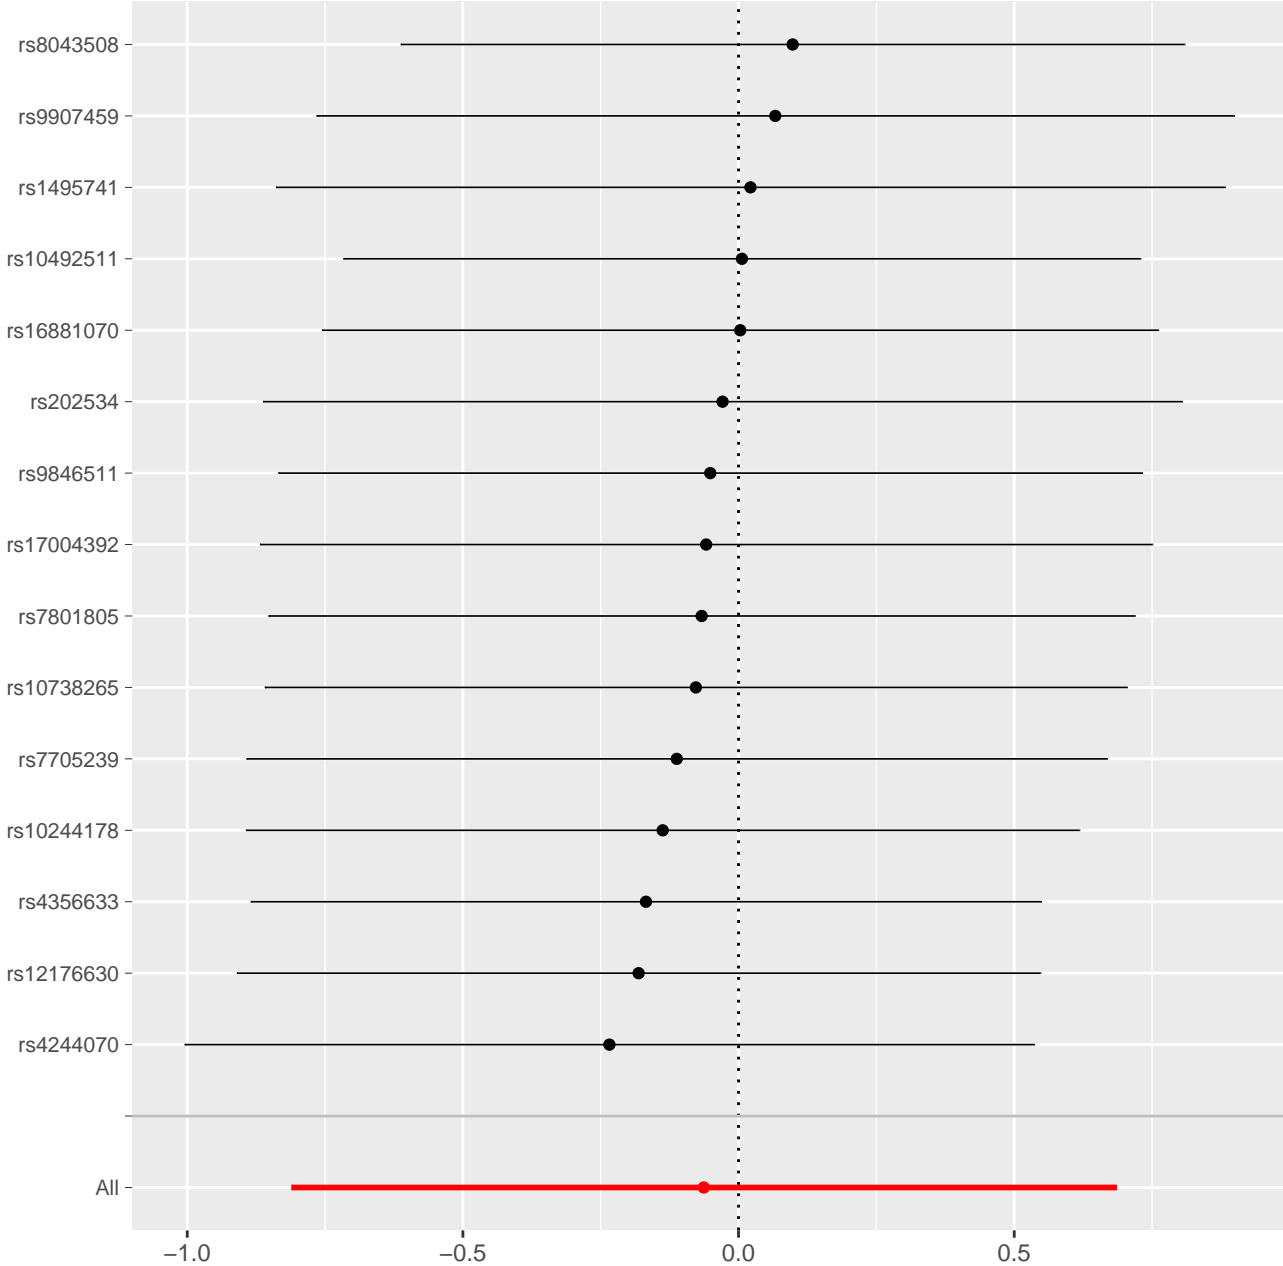

MR leave-one-out sensitivity analysis for 'M34395.metal.pos.txt.gz' on 'JUVEN\_ARTHR.gz'

rs12505728

rs10959207

rs739163

rs4724785

rs9333273

rs624649

rs3763790

rs1395489

rs4358841

rs4398579

All

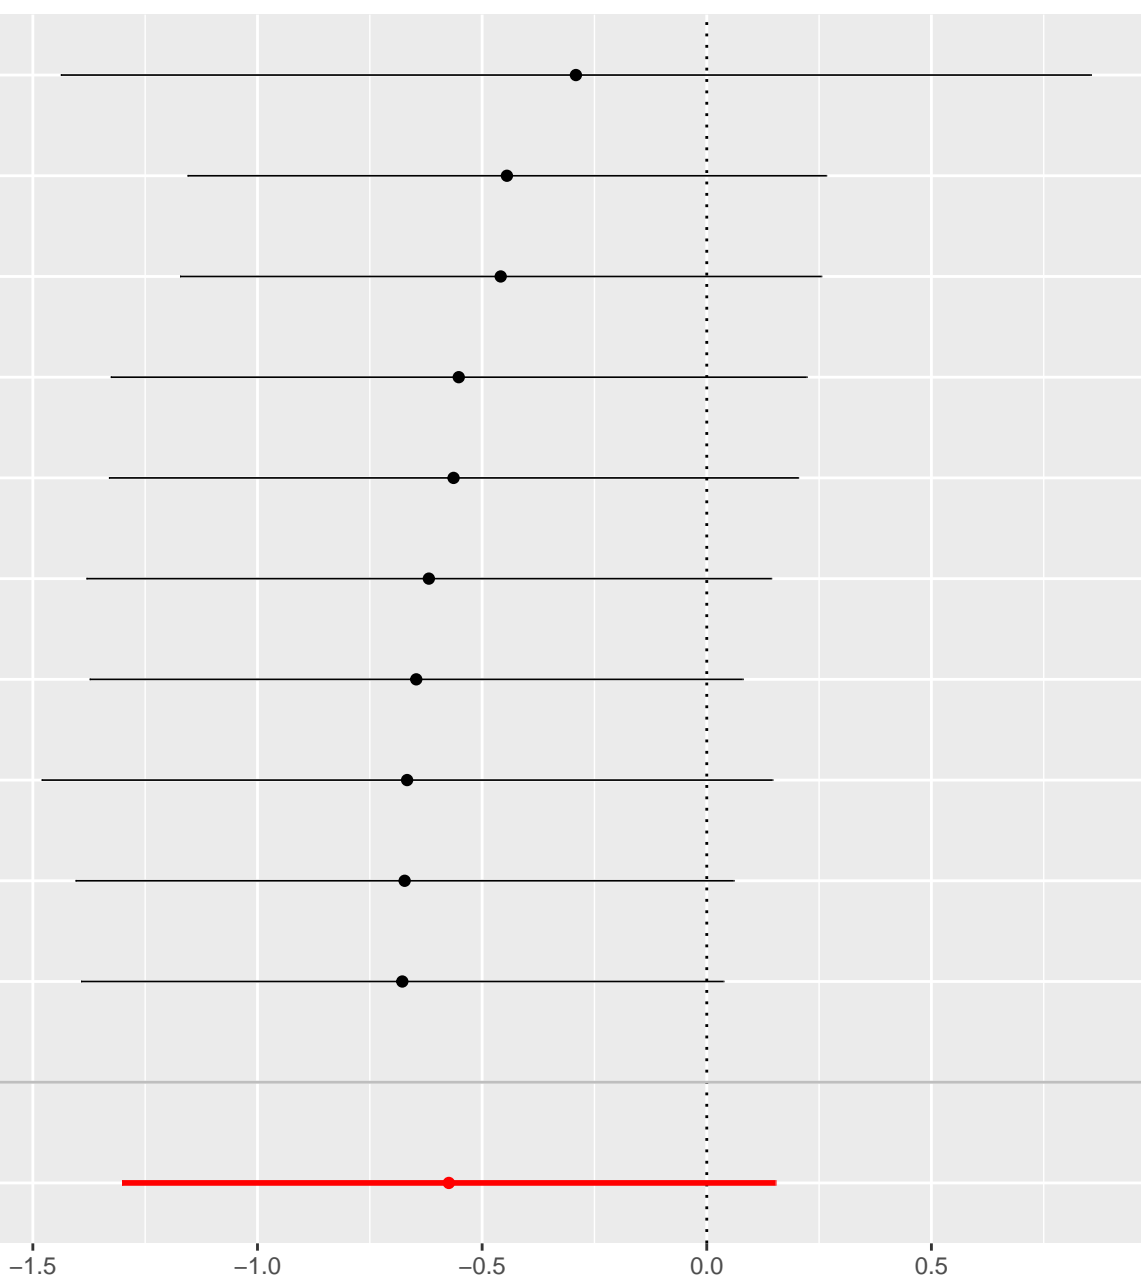

rs10955109  
rs7042159  
rs10916110  
rs3913646  
rs9415646  
rs1944577  
rs9945857  
  
All

-0.25 0.00 0.25 0.50

MR leave-one-out sensitivity analysis for  
'M34404.metal.pos.txt.gz' on 'JUVEN\_ARTHR.gz'

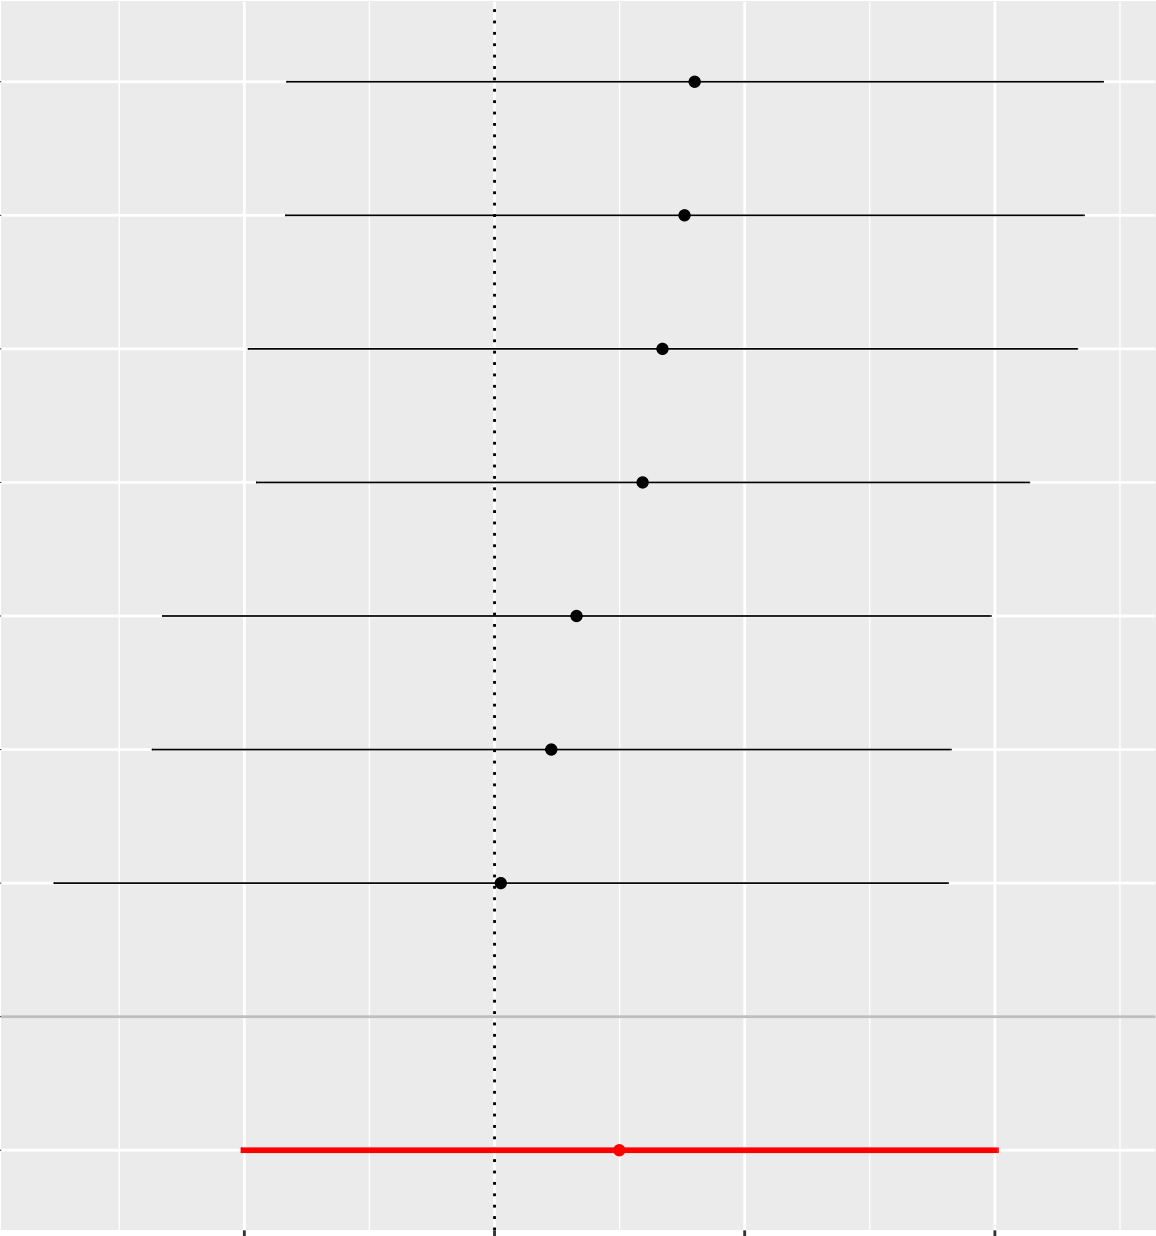



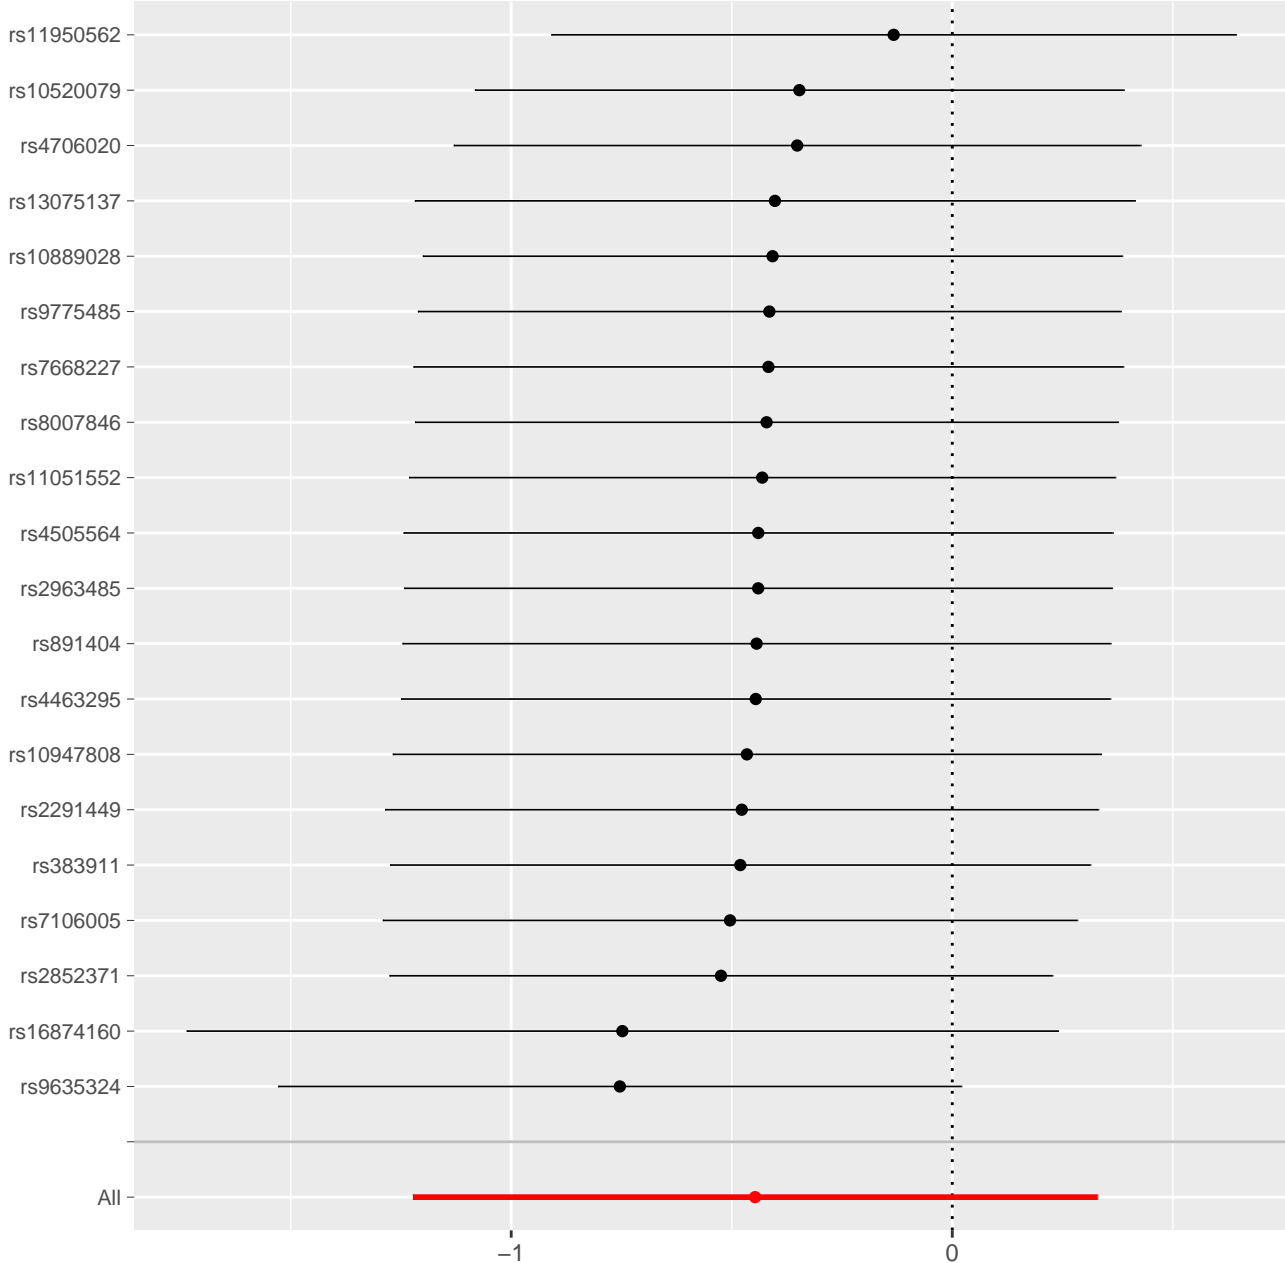

MR leave-one-out sensitivity analysis for 'M34407.metal.pos.txt.gz' on 'JUVEN\_ARTHR.gz'

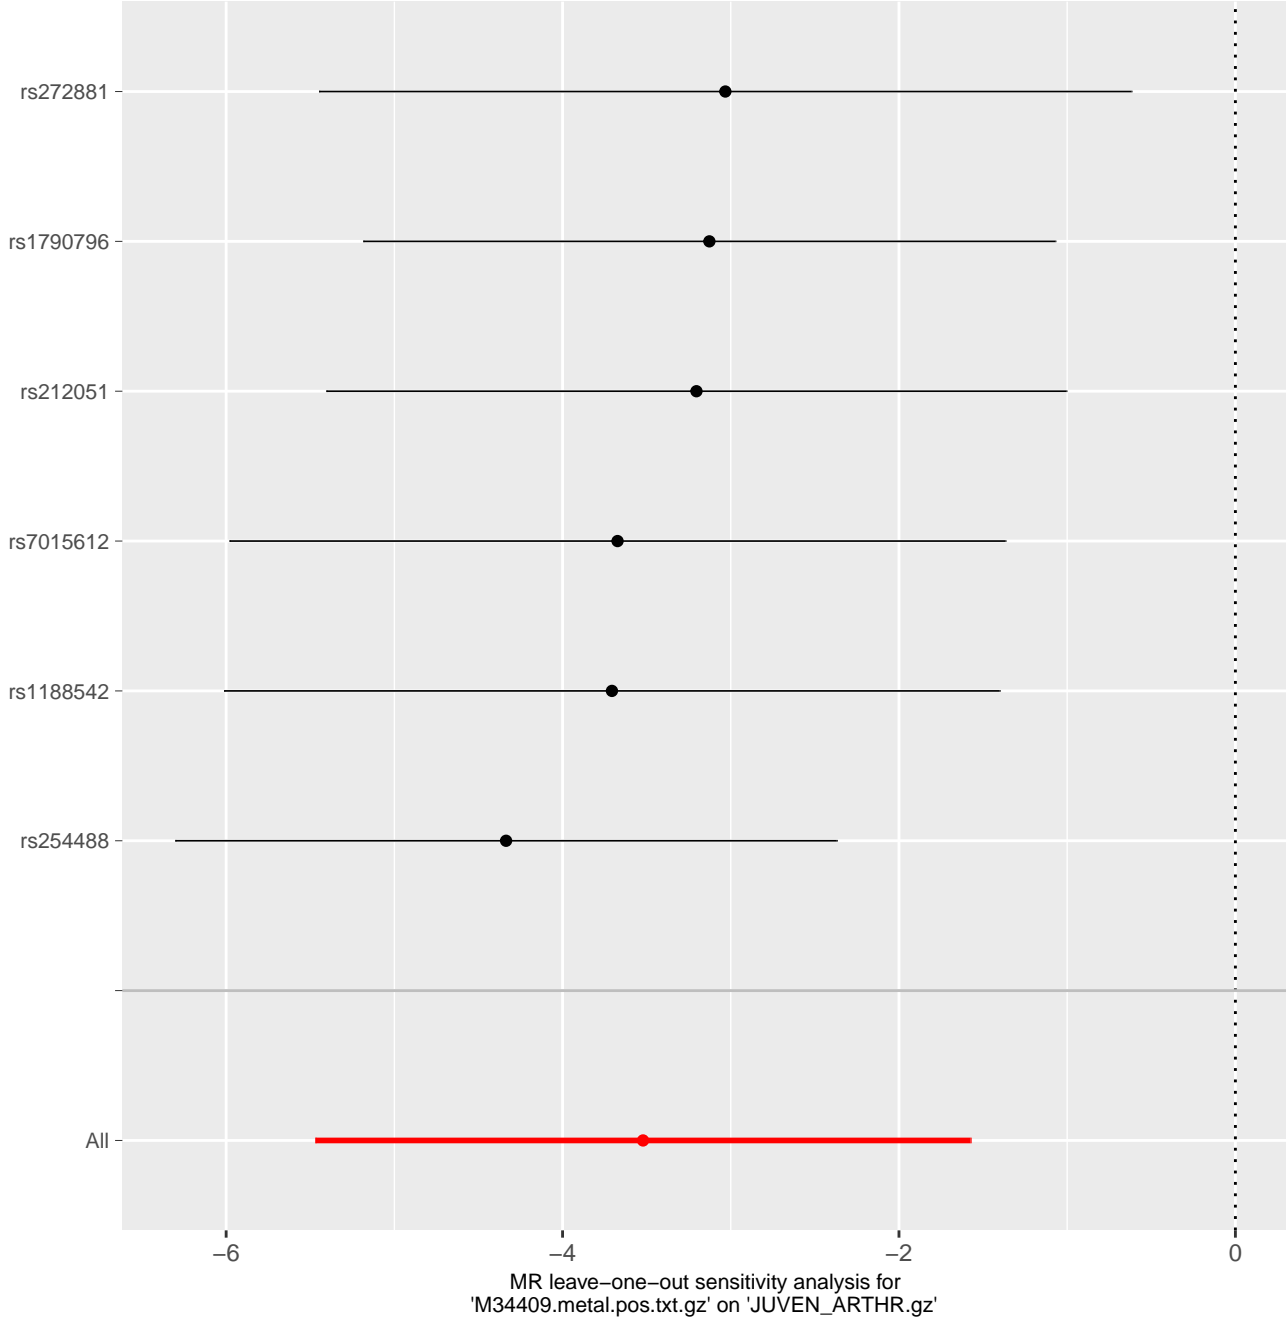

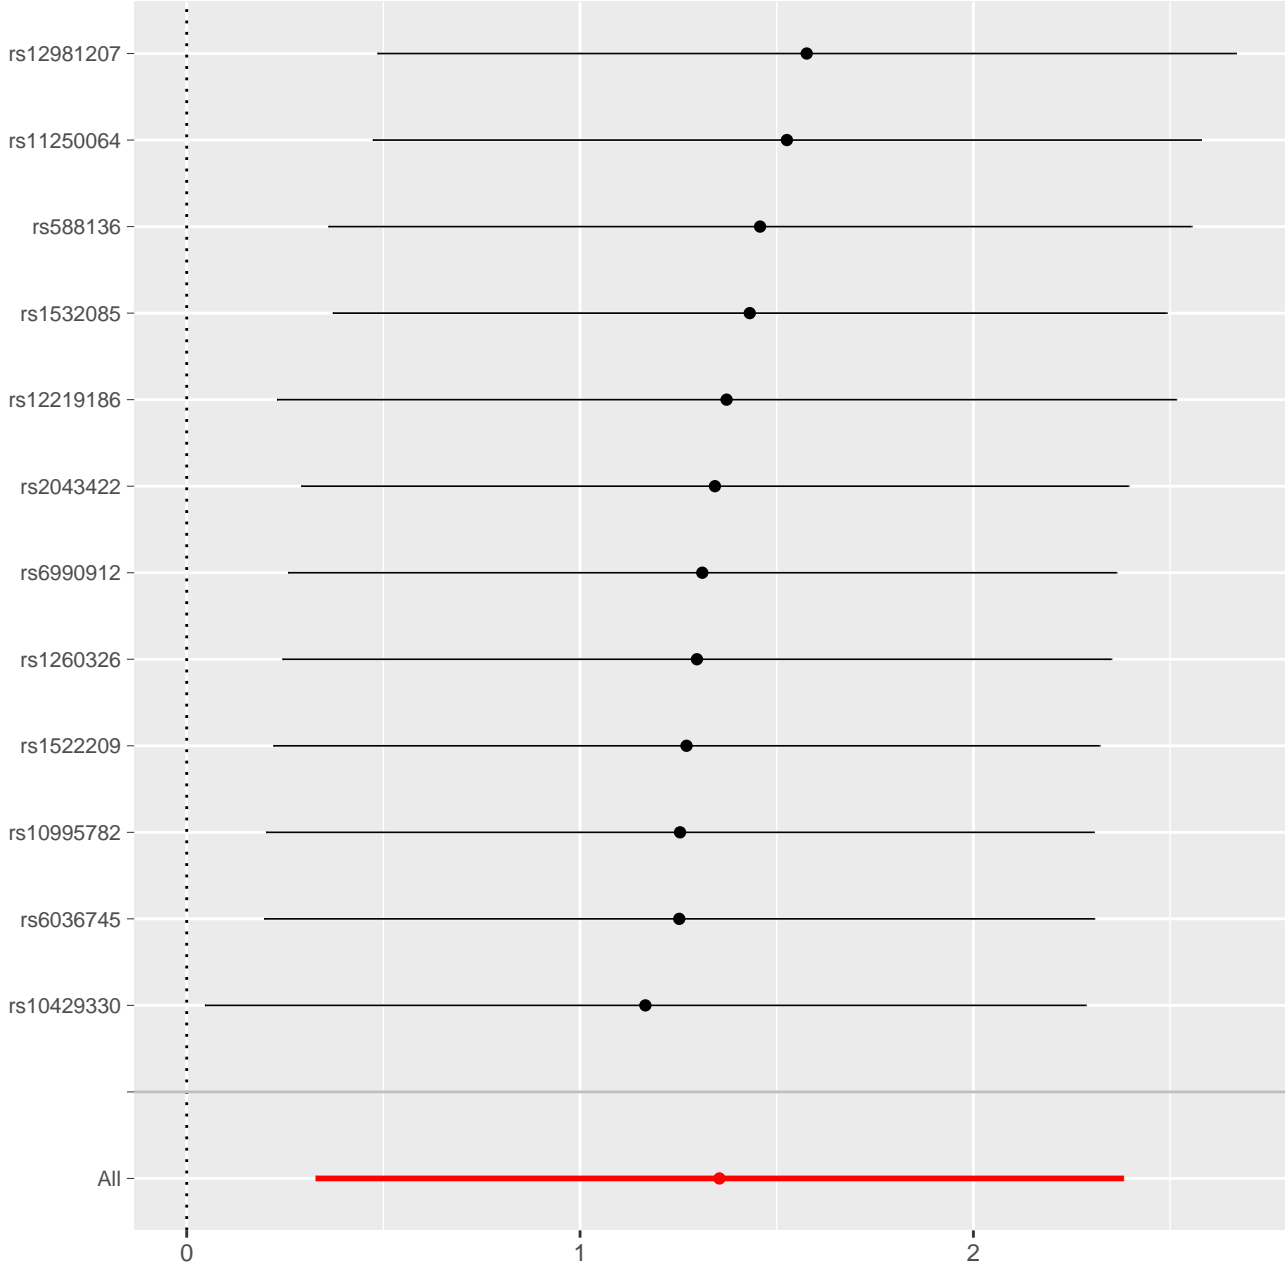

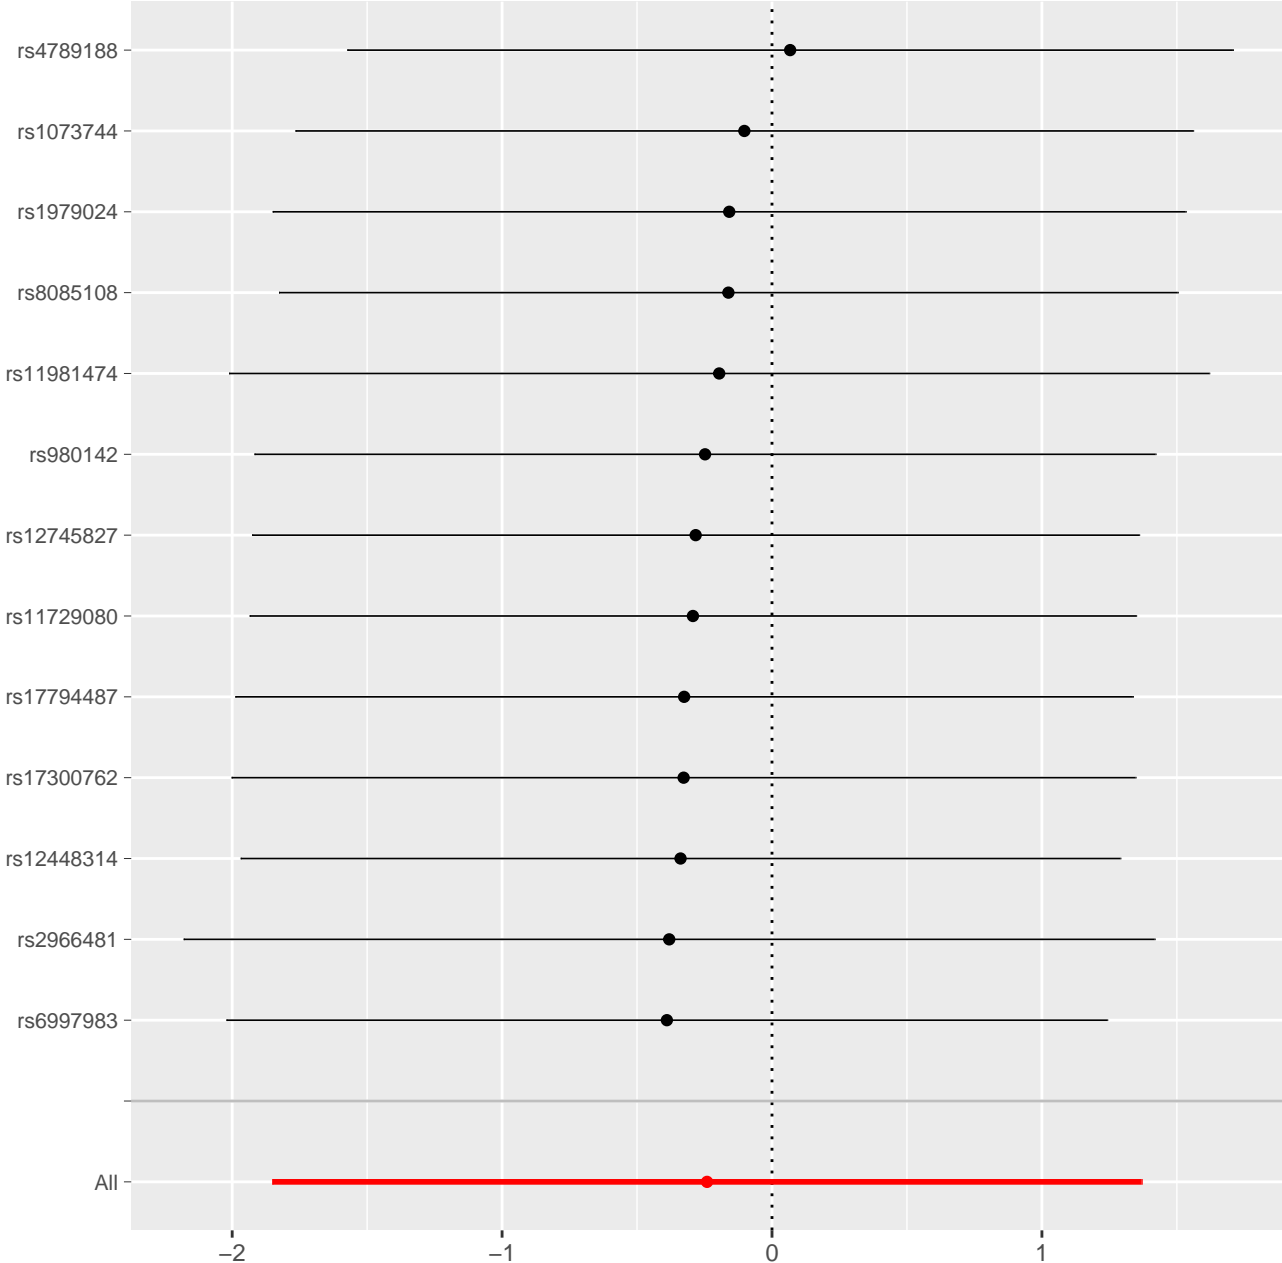

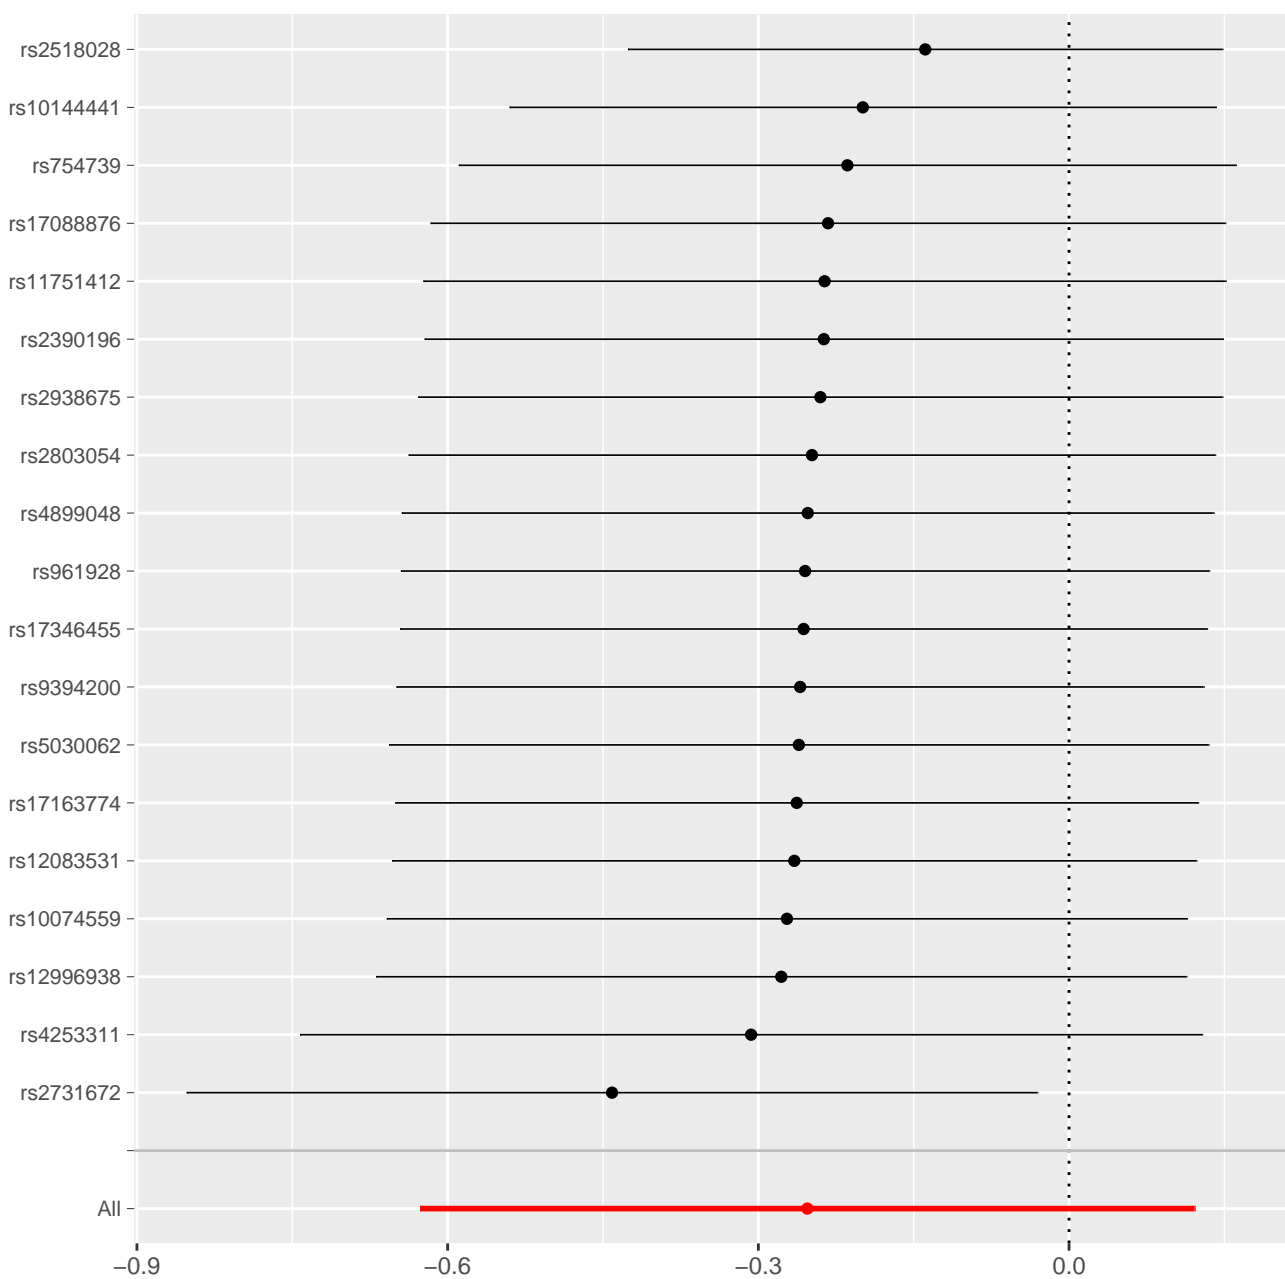

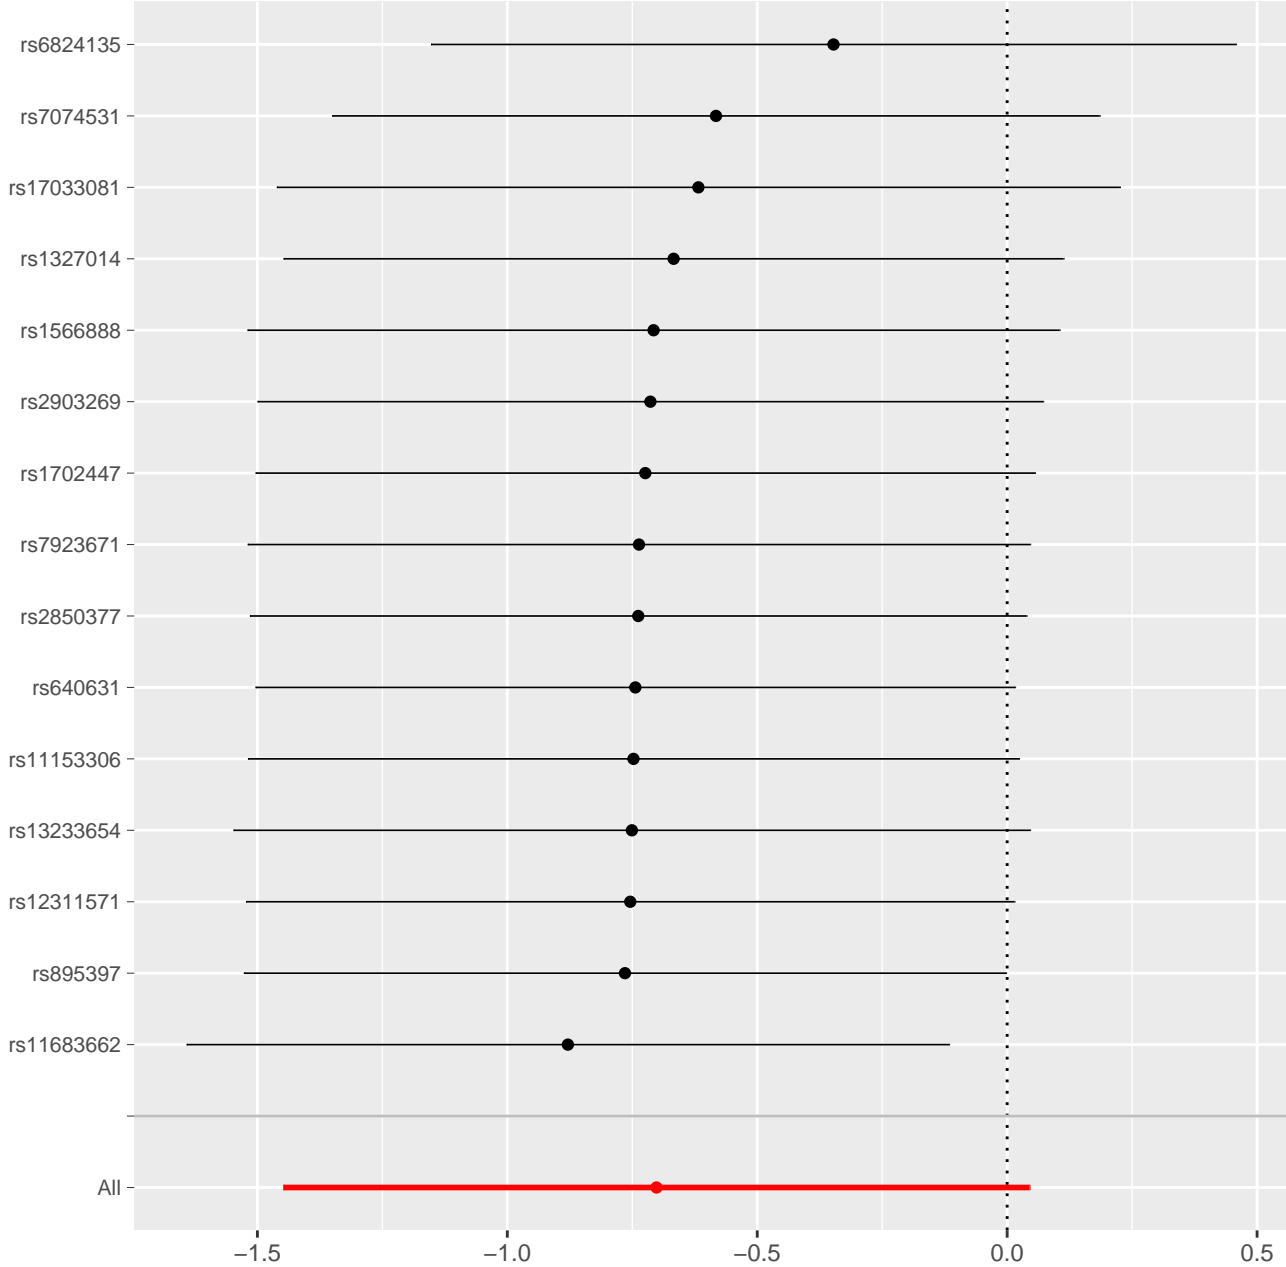

rs10483129

rs812573

rs6429539

All

-8

-4

0

4

MR leave-one-out sensitivity analysis for  
'M34453.metal.pos.txt.gz' on 'JUVEN\_ARTHR.gz'

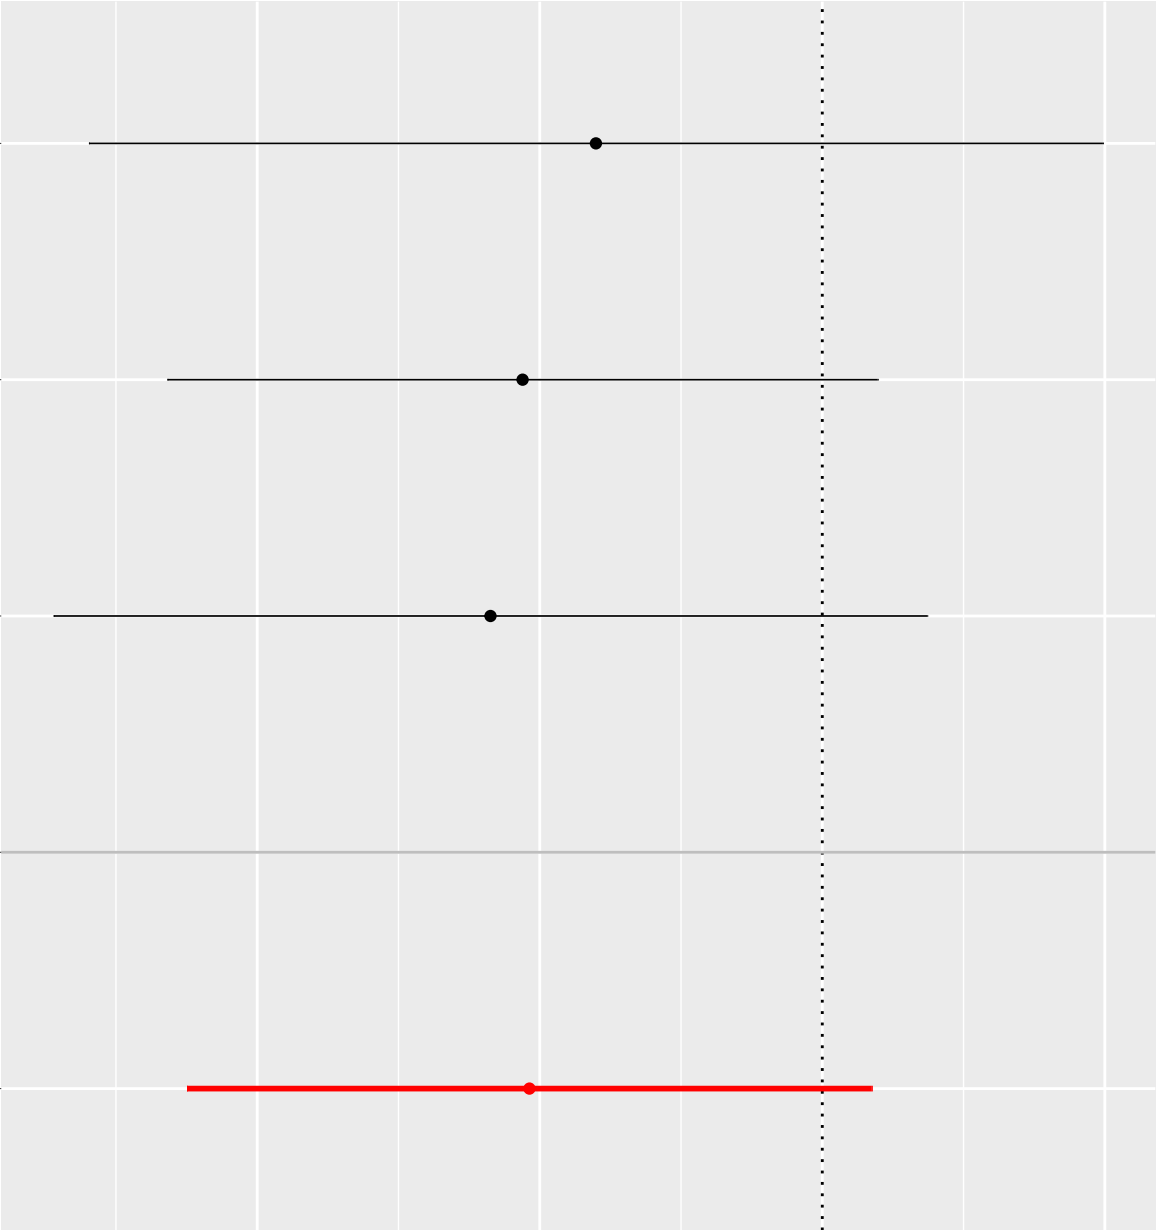

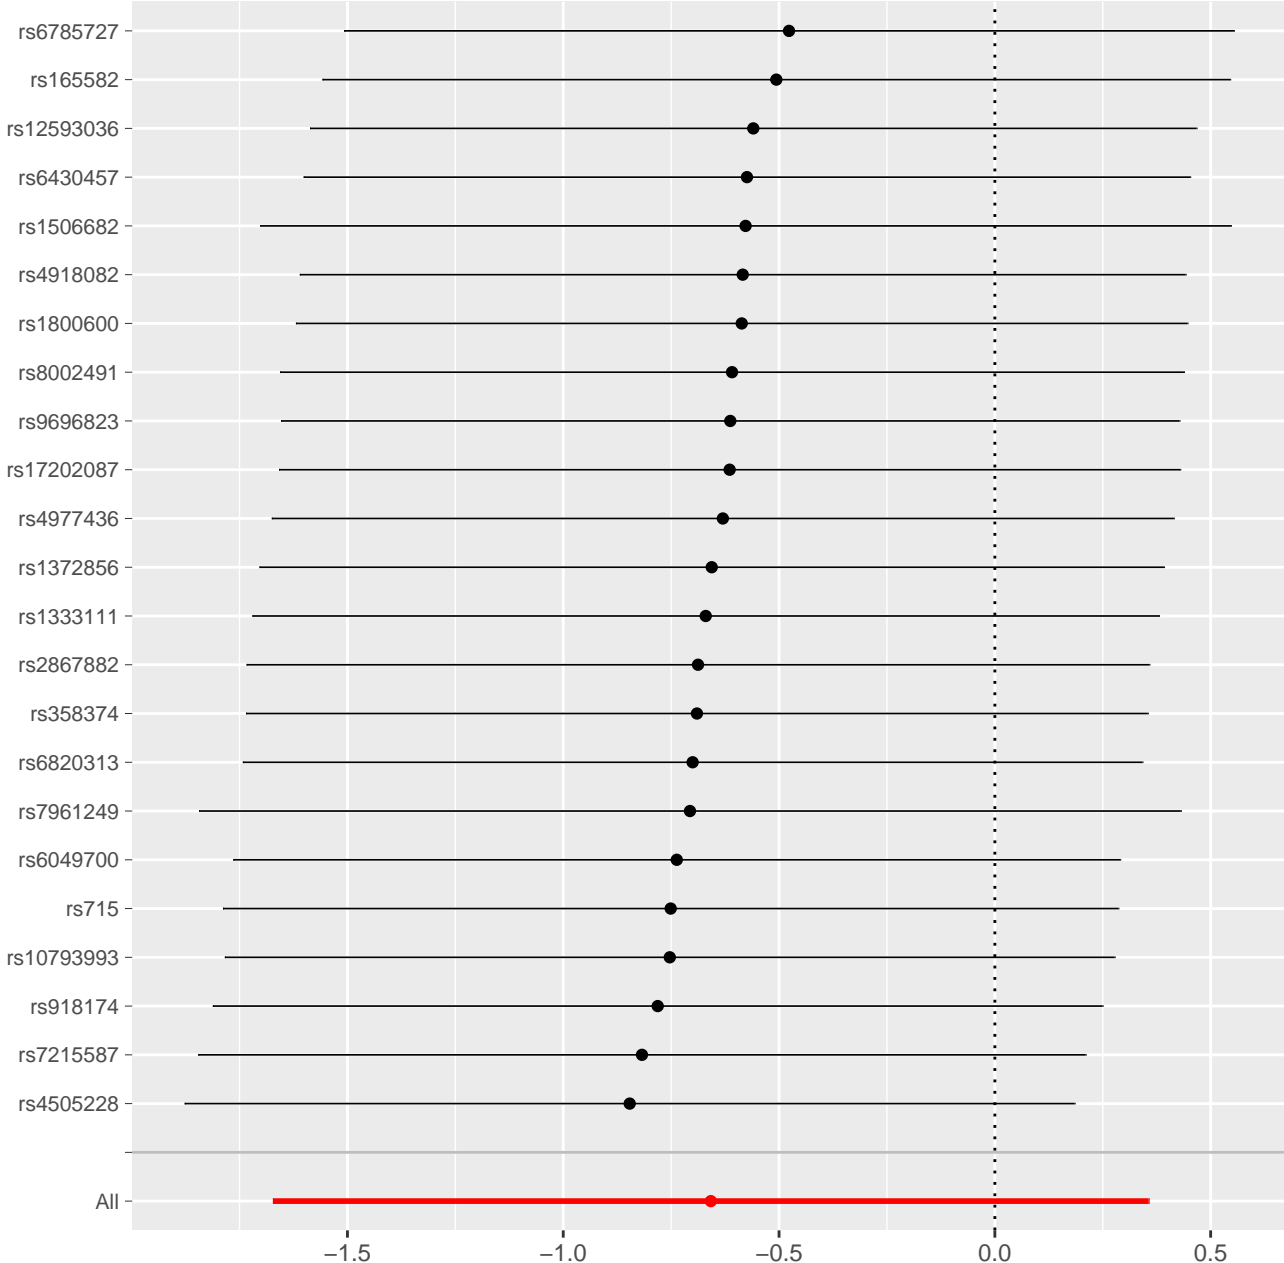

MR leave-one-out sensitivity analysis for 'M34456.metal.pos.txt.gz' on 'JUVEN\_ARTHR.gz'



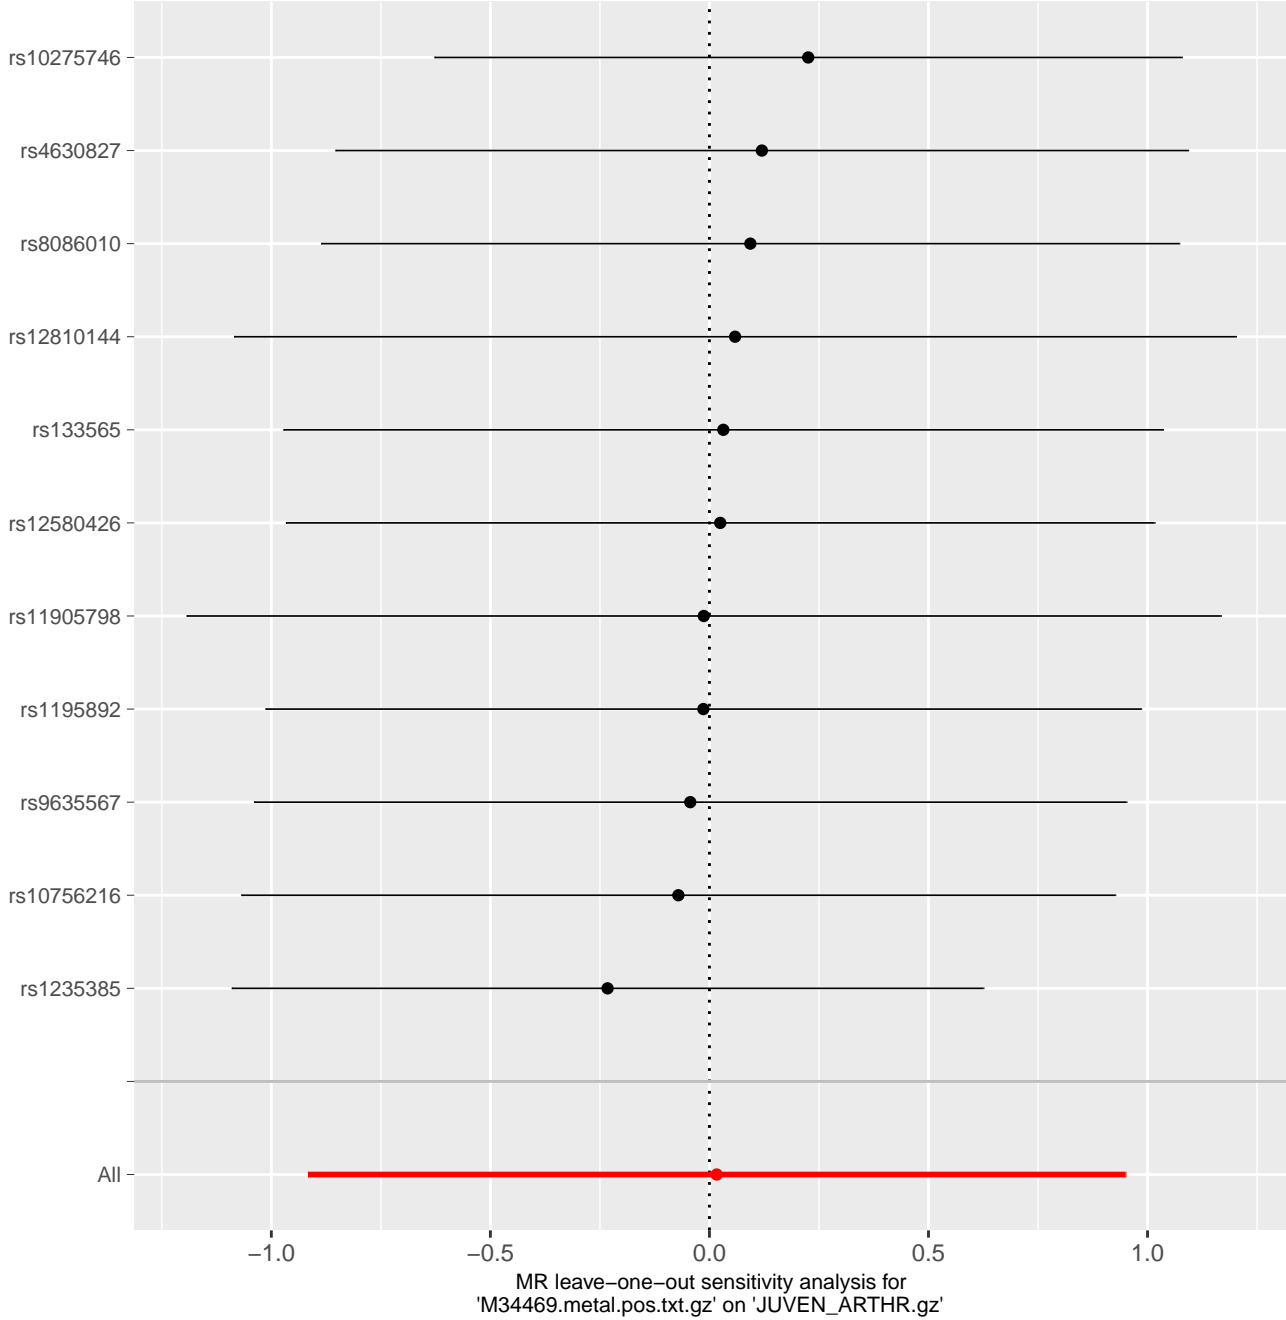

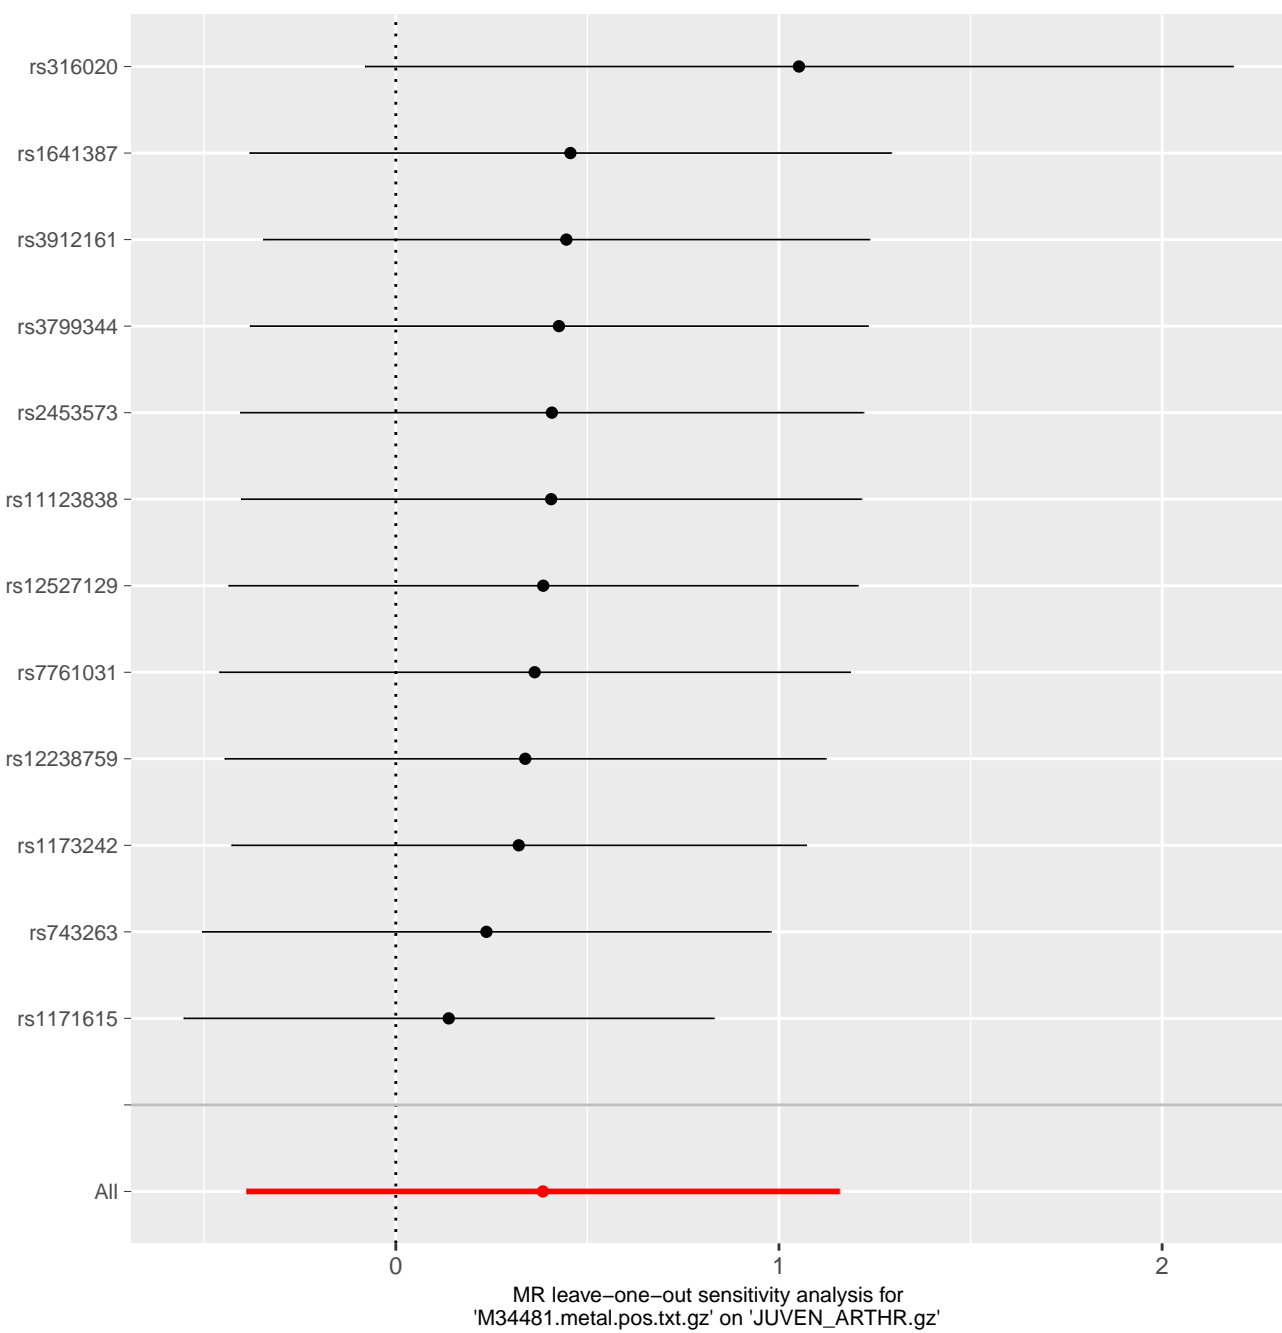

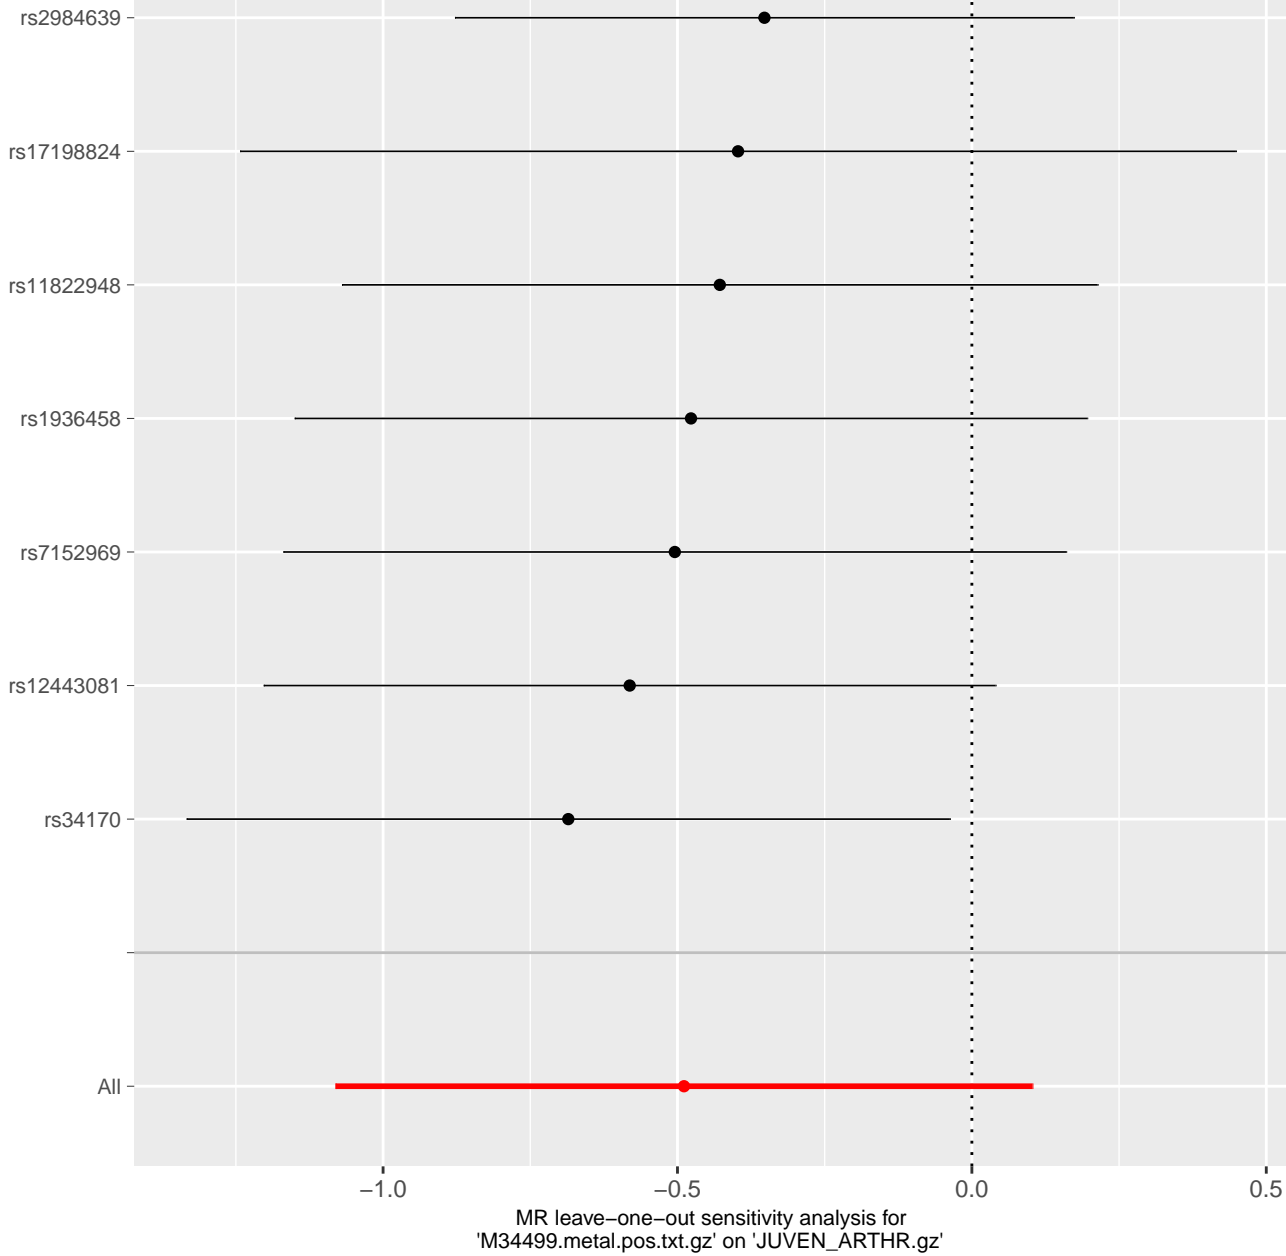

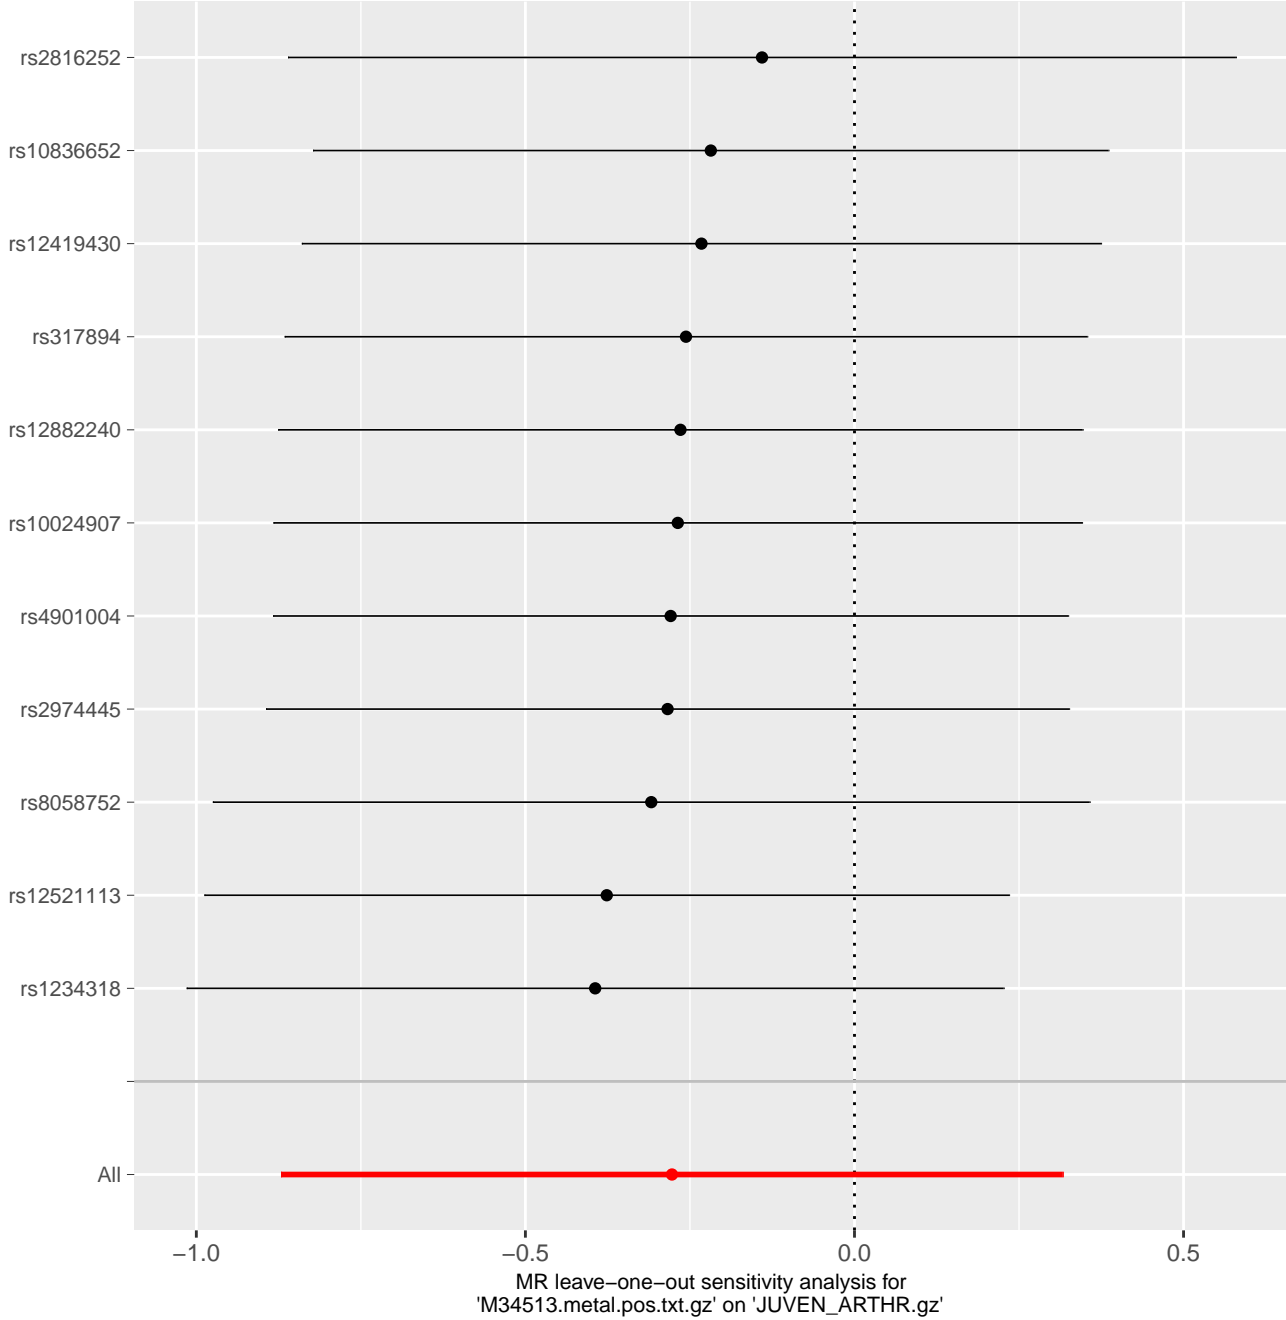

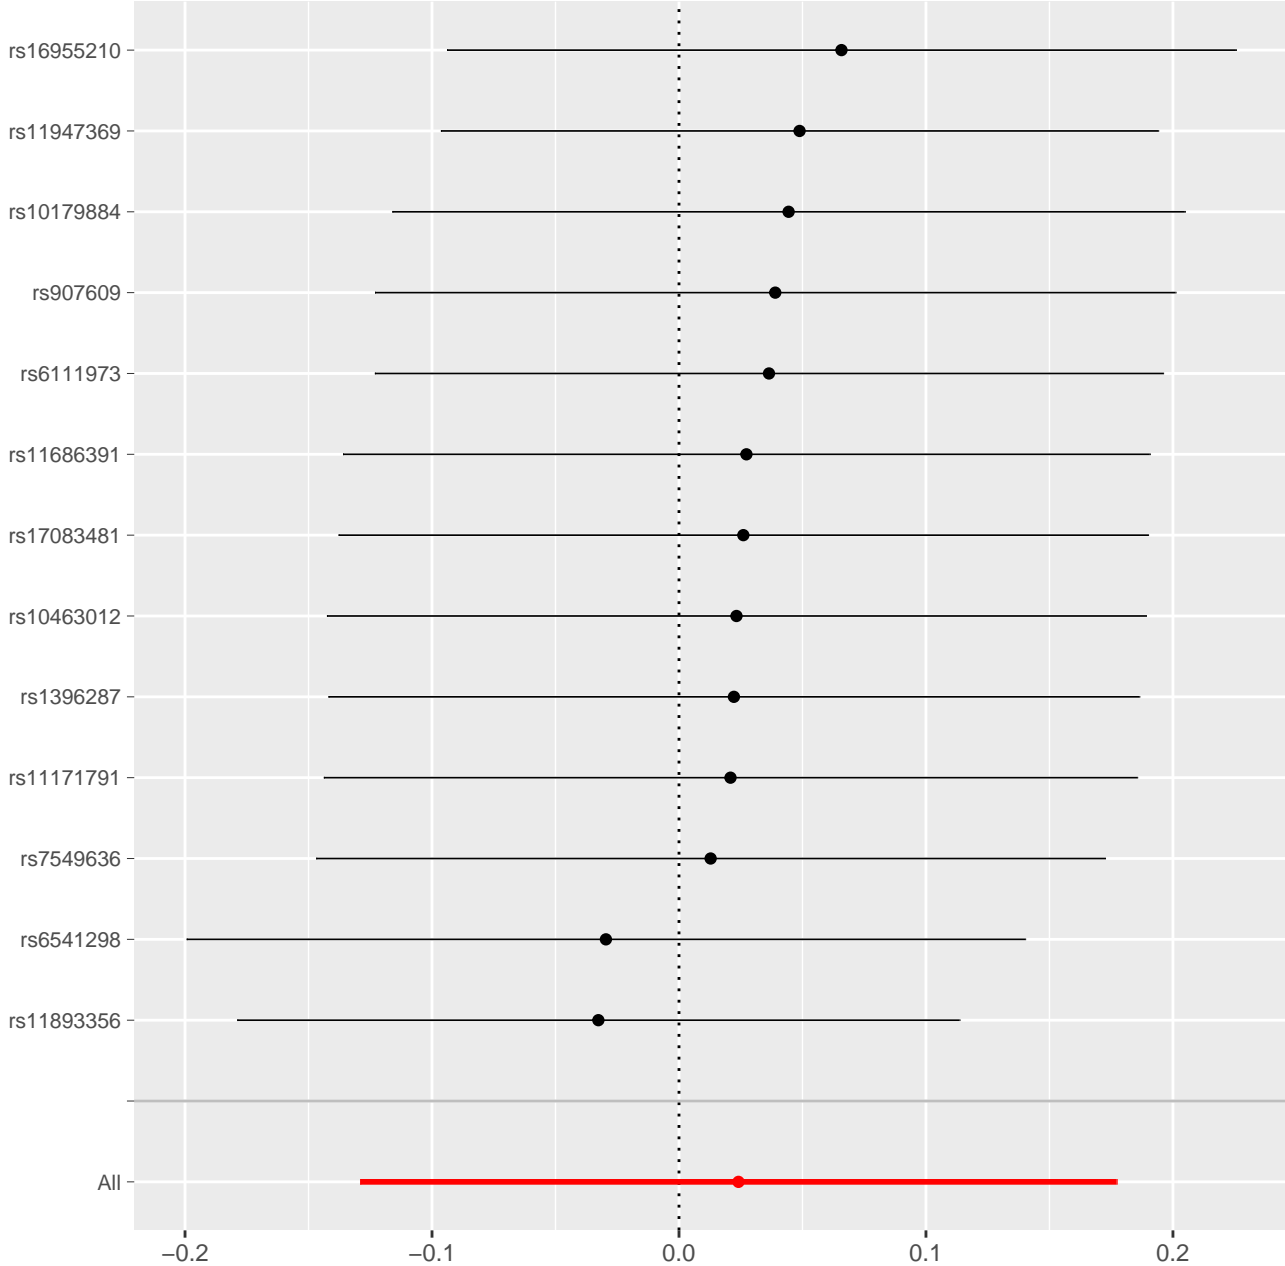

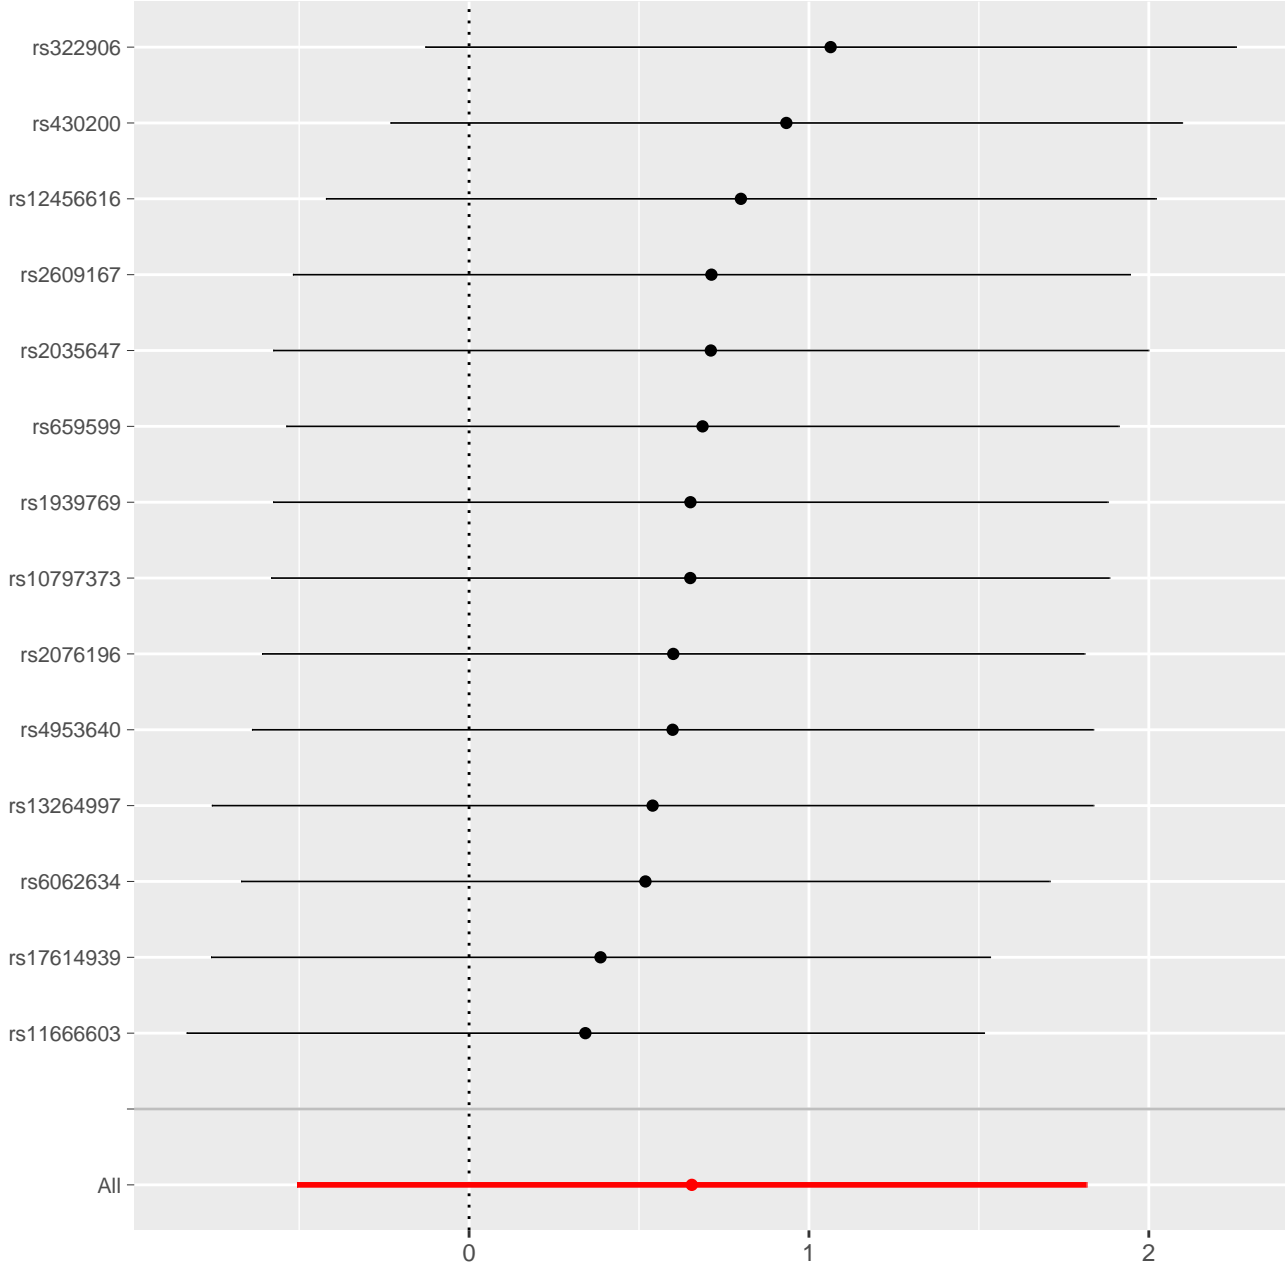

MR leave-one-out sensitivity analysis for 'M34527.metal.pos.txt.gz' on 'JUVEN\_ARTHR.gz'

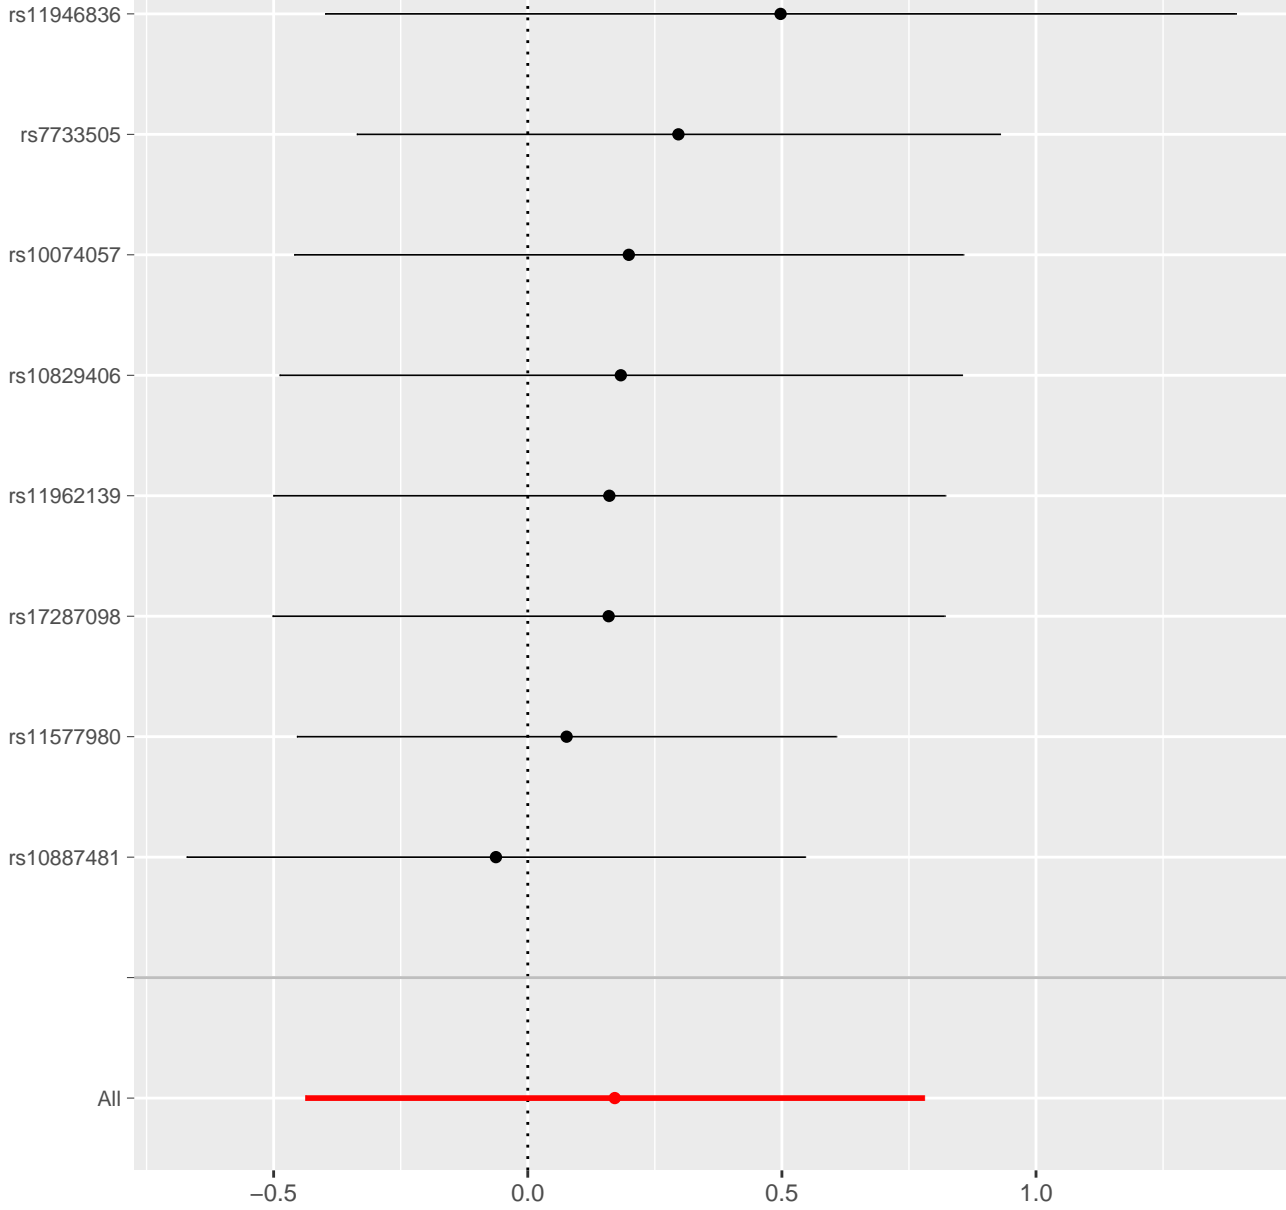

MR leave-one-out sensitivity analysis for 'M34530.metal.pos.txt.gz' on 'JUVEN\_ARTHR.gz'

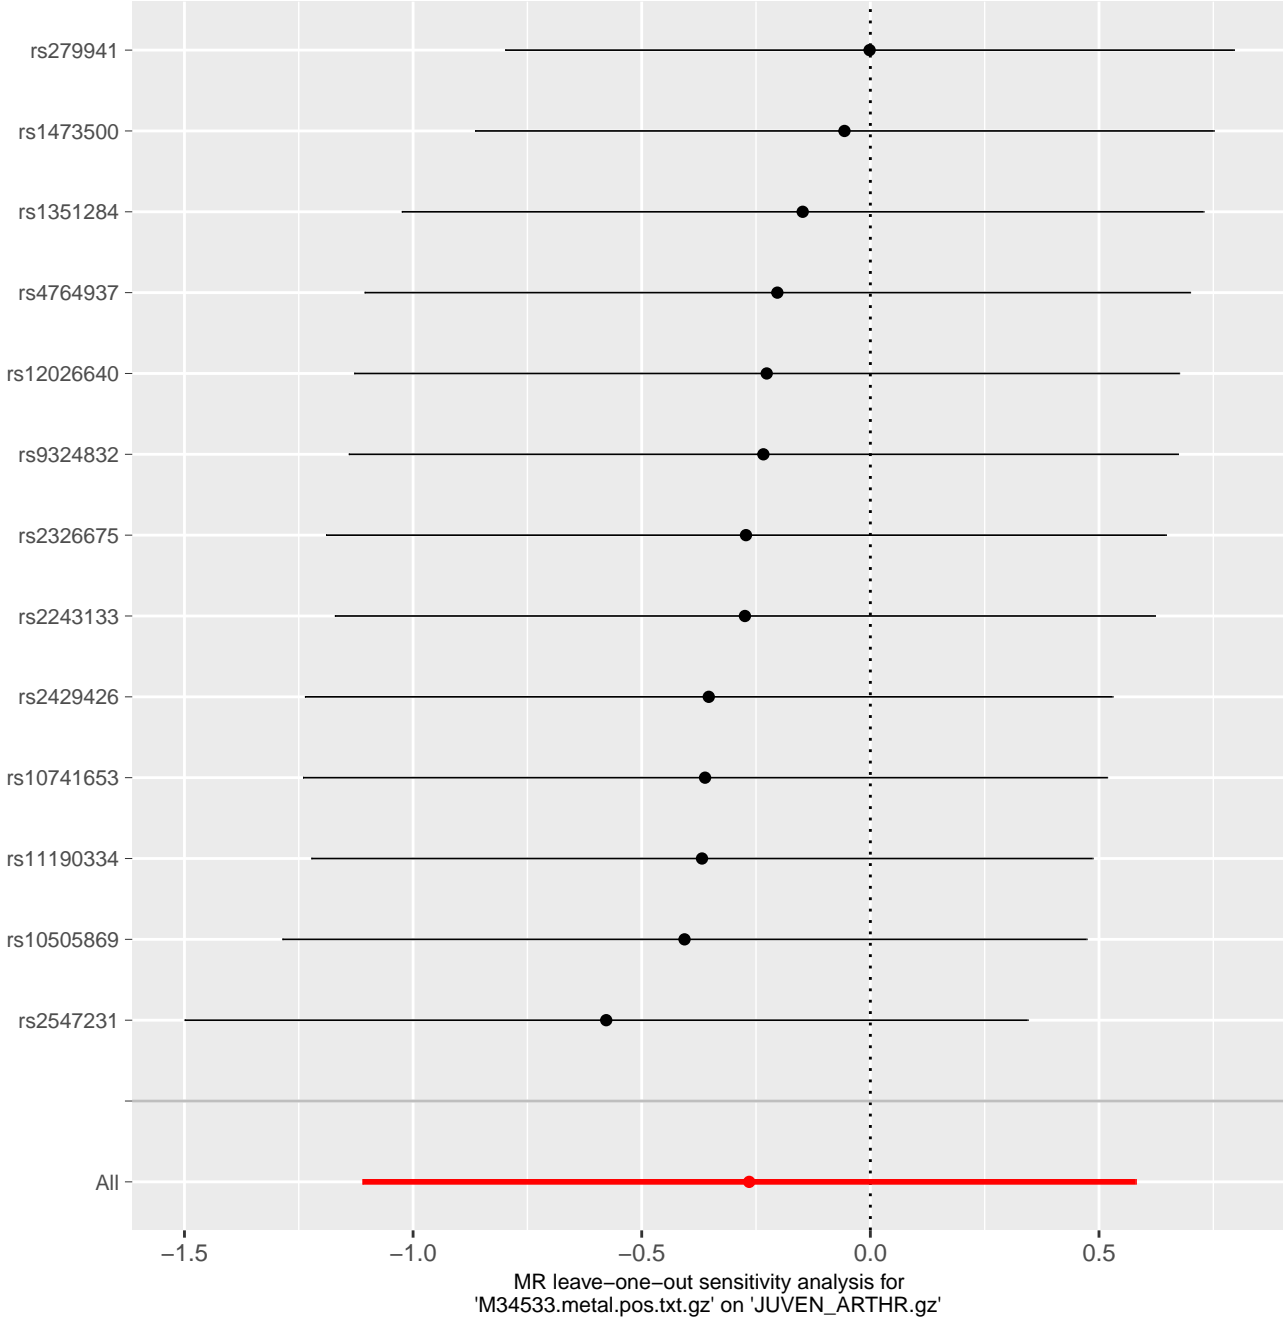



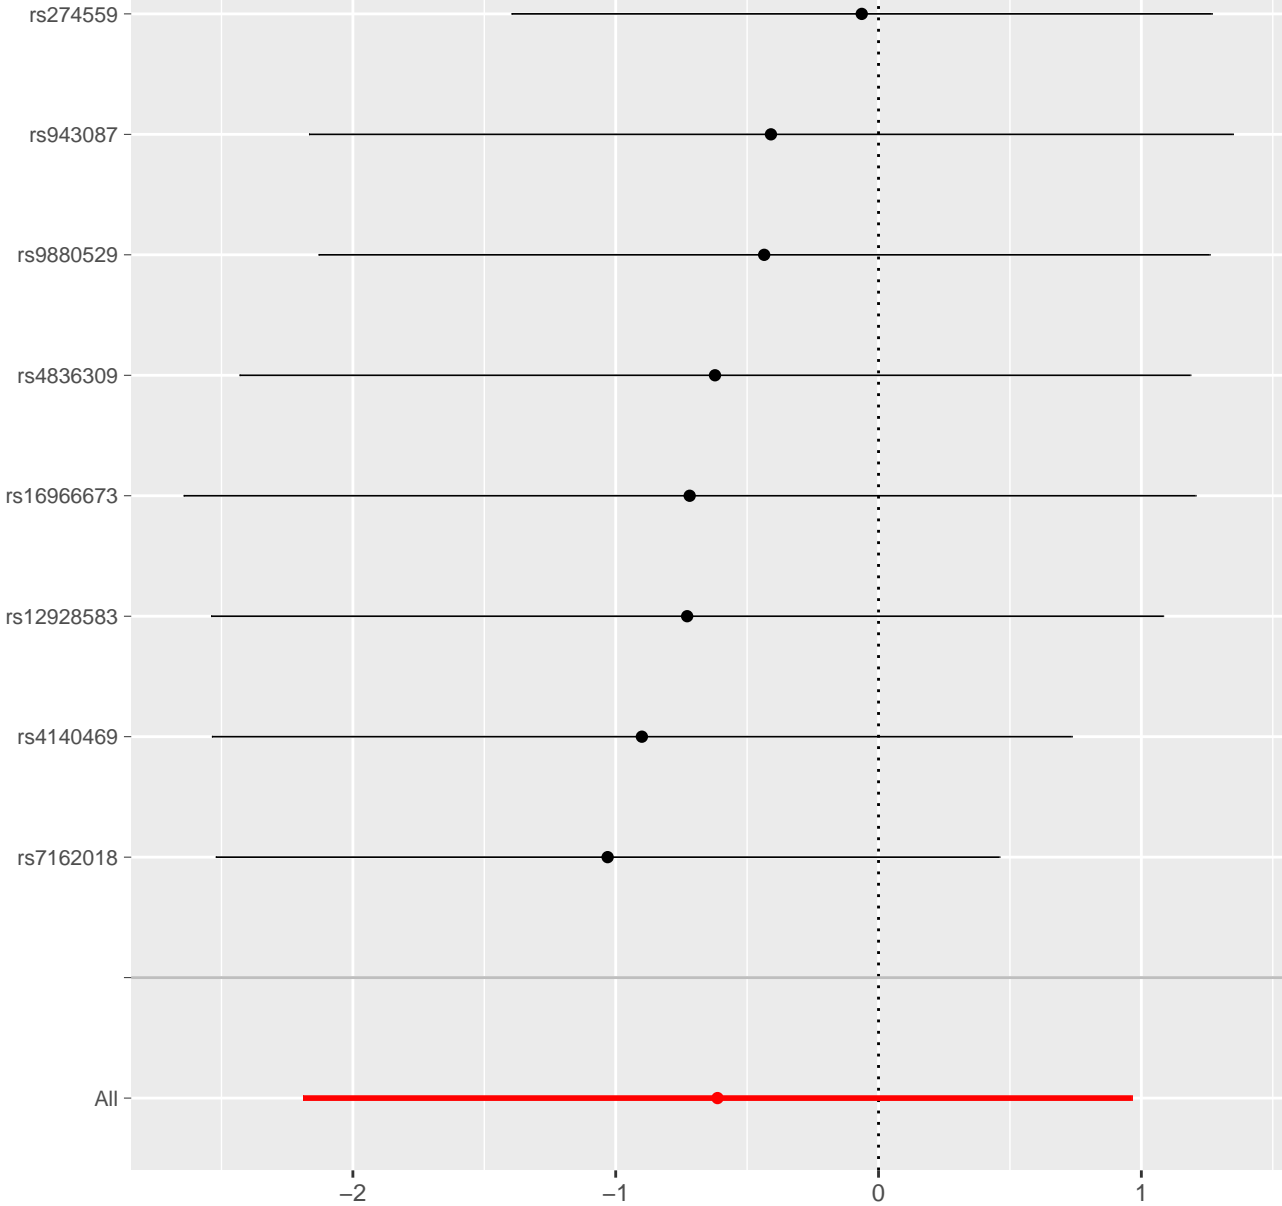

MR leave-one-out sensitivity analysis for 'M34534.metal.pos.txt.gz' on 'JUVEN\_ARTHR.gz'

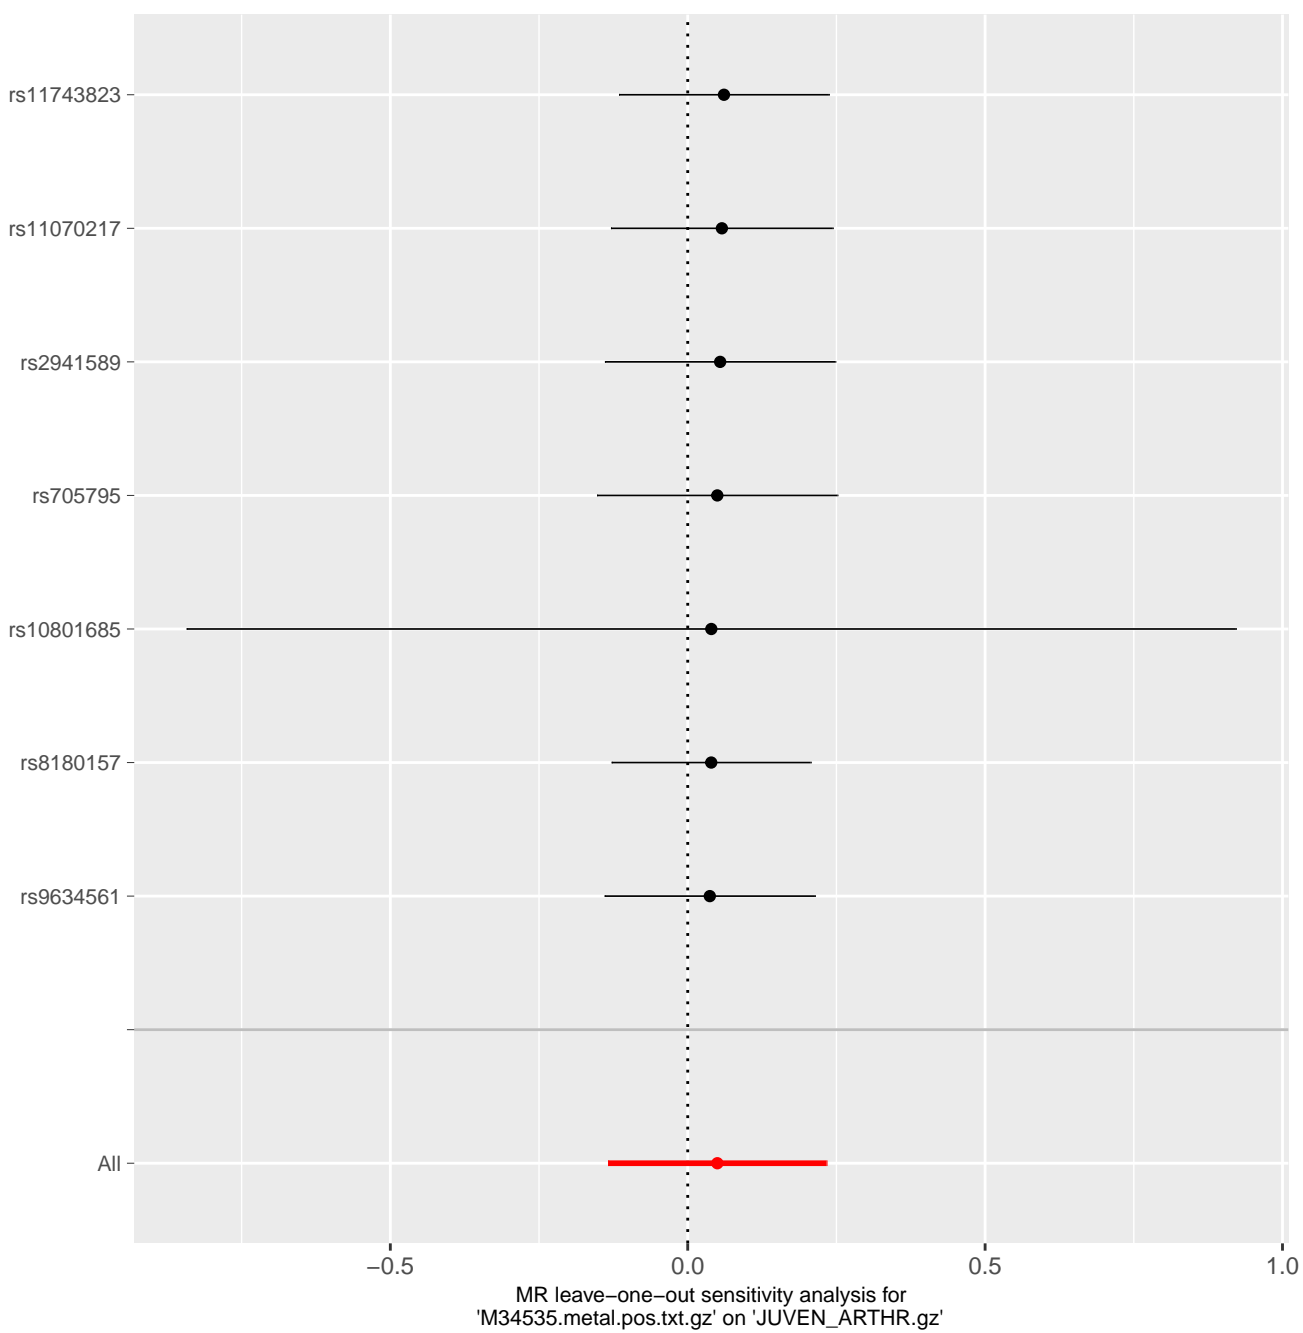

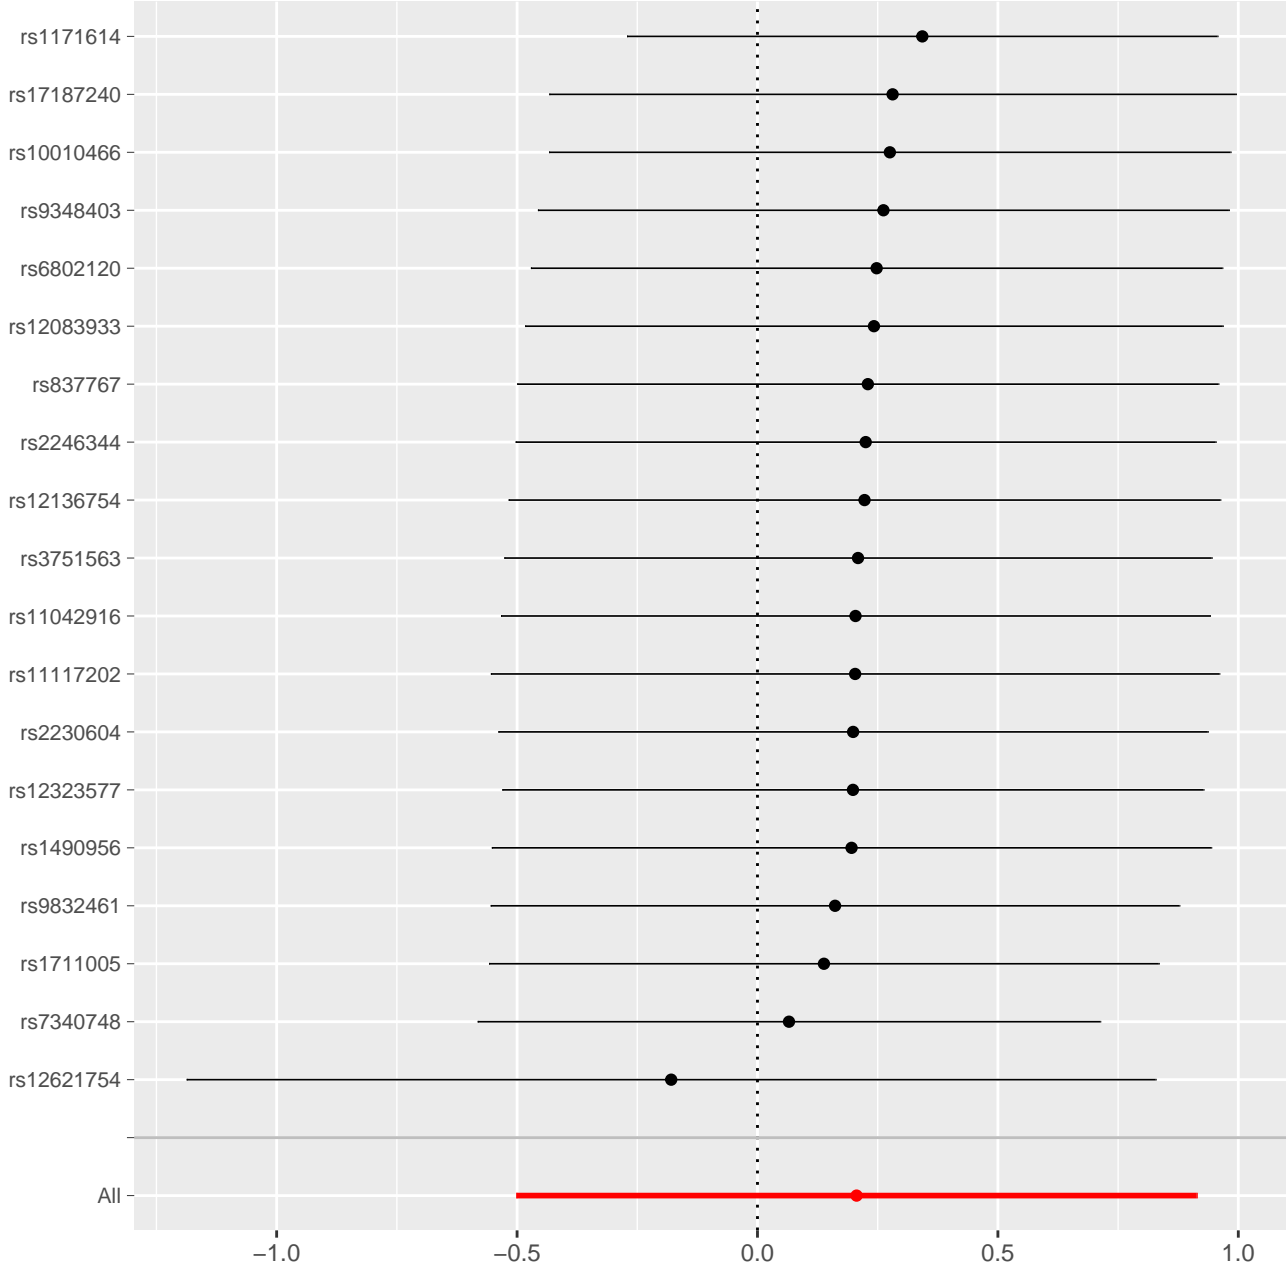

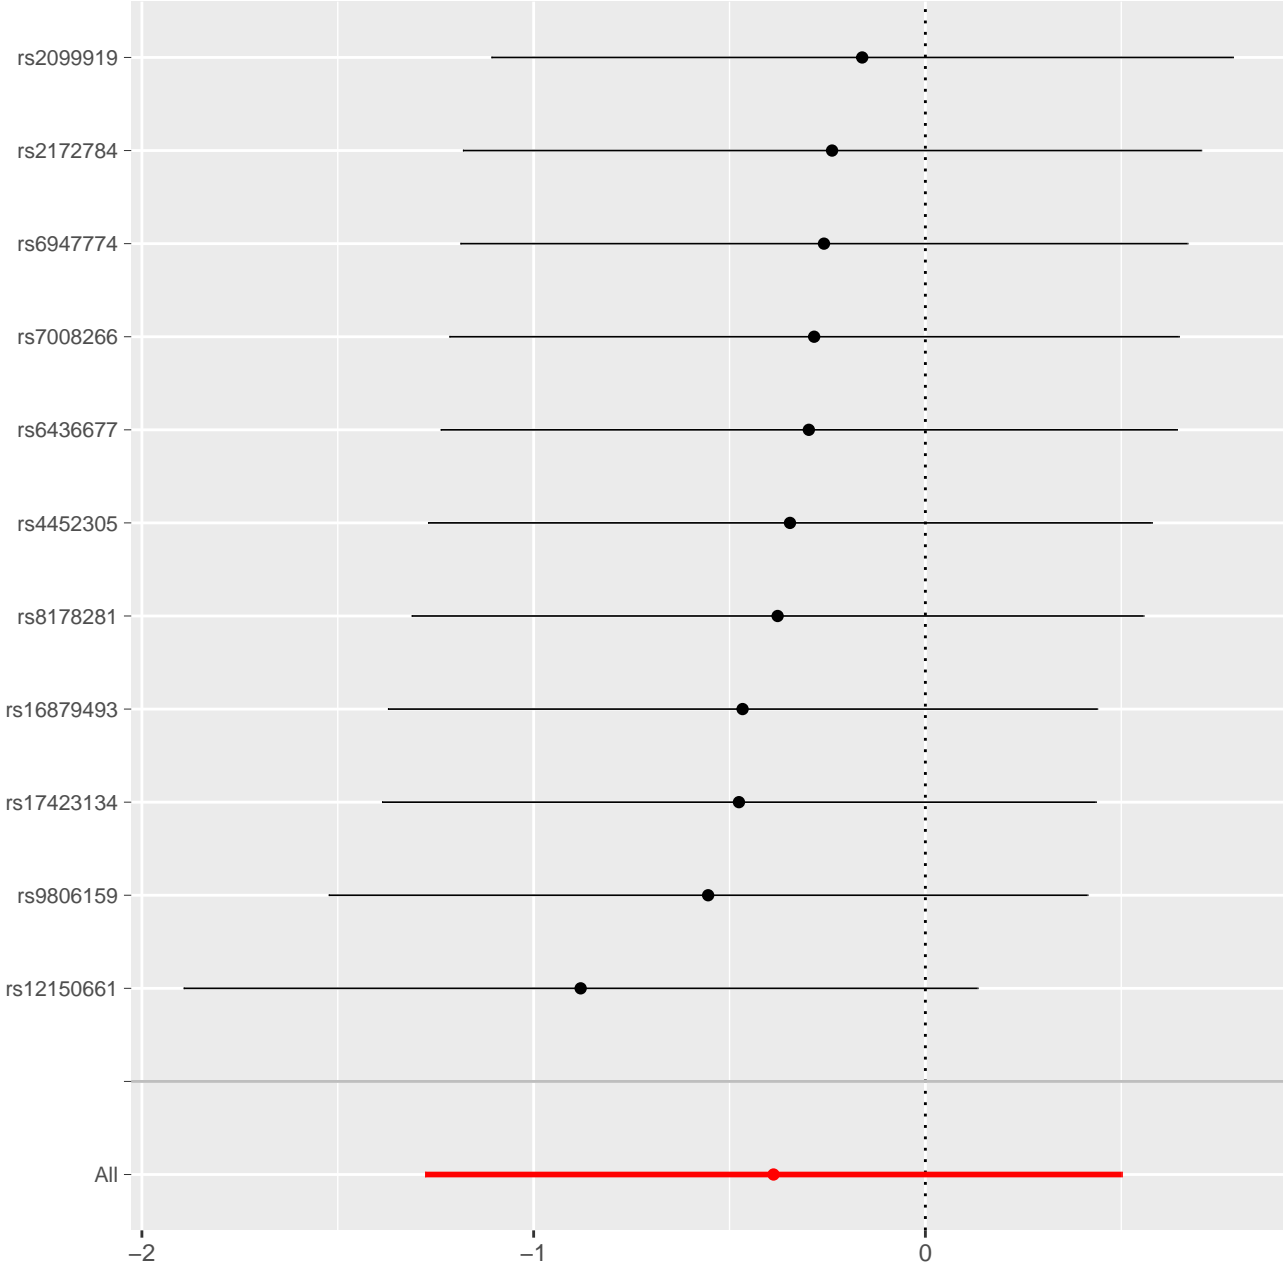

rs1456197

rs4861137

rs6907935

rs4680092

All

-2

0

2

4

MR leave-one-out sensitivity analysis for  
'M34732.metal.pos.txt.gz' on 'JUVEN\_ARTHR.gz'

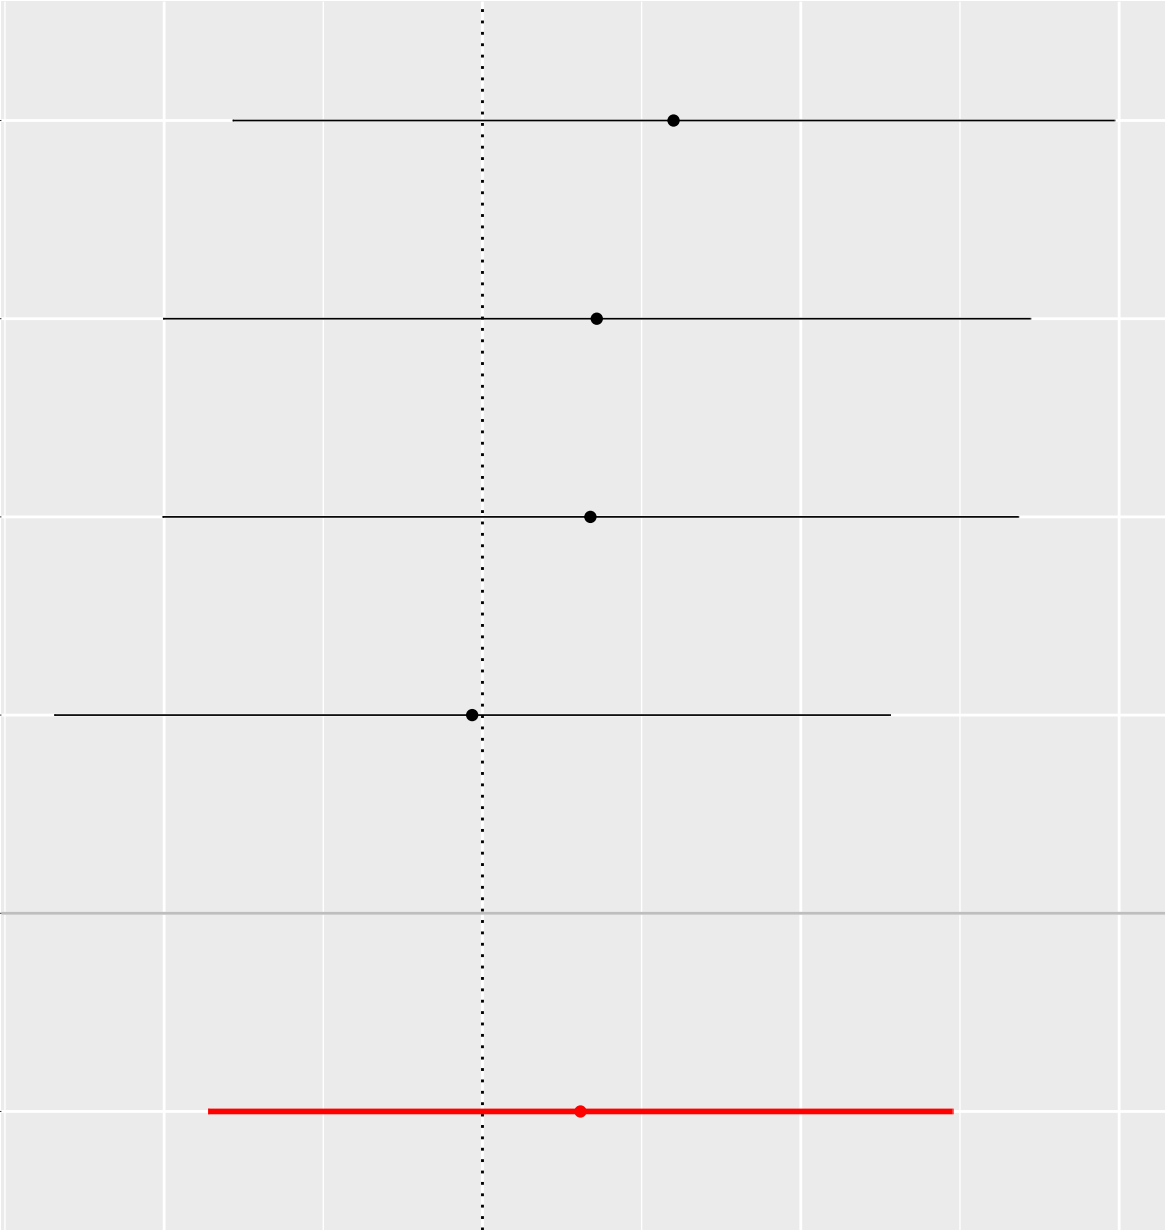

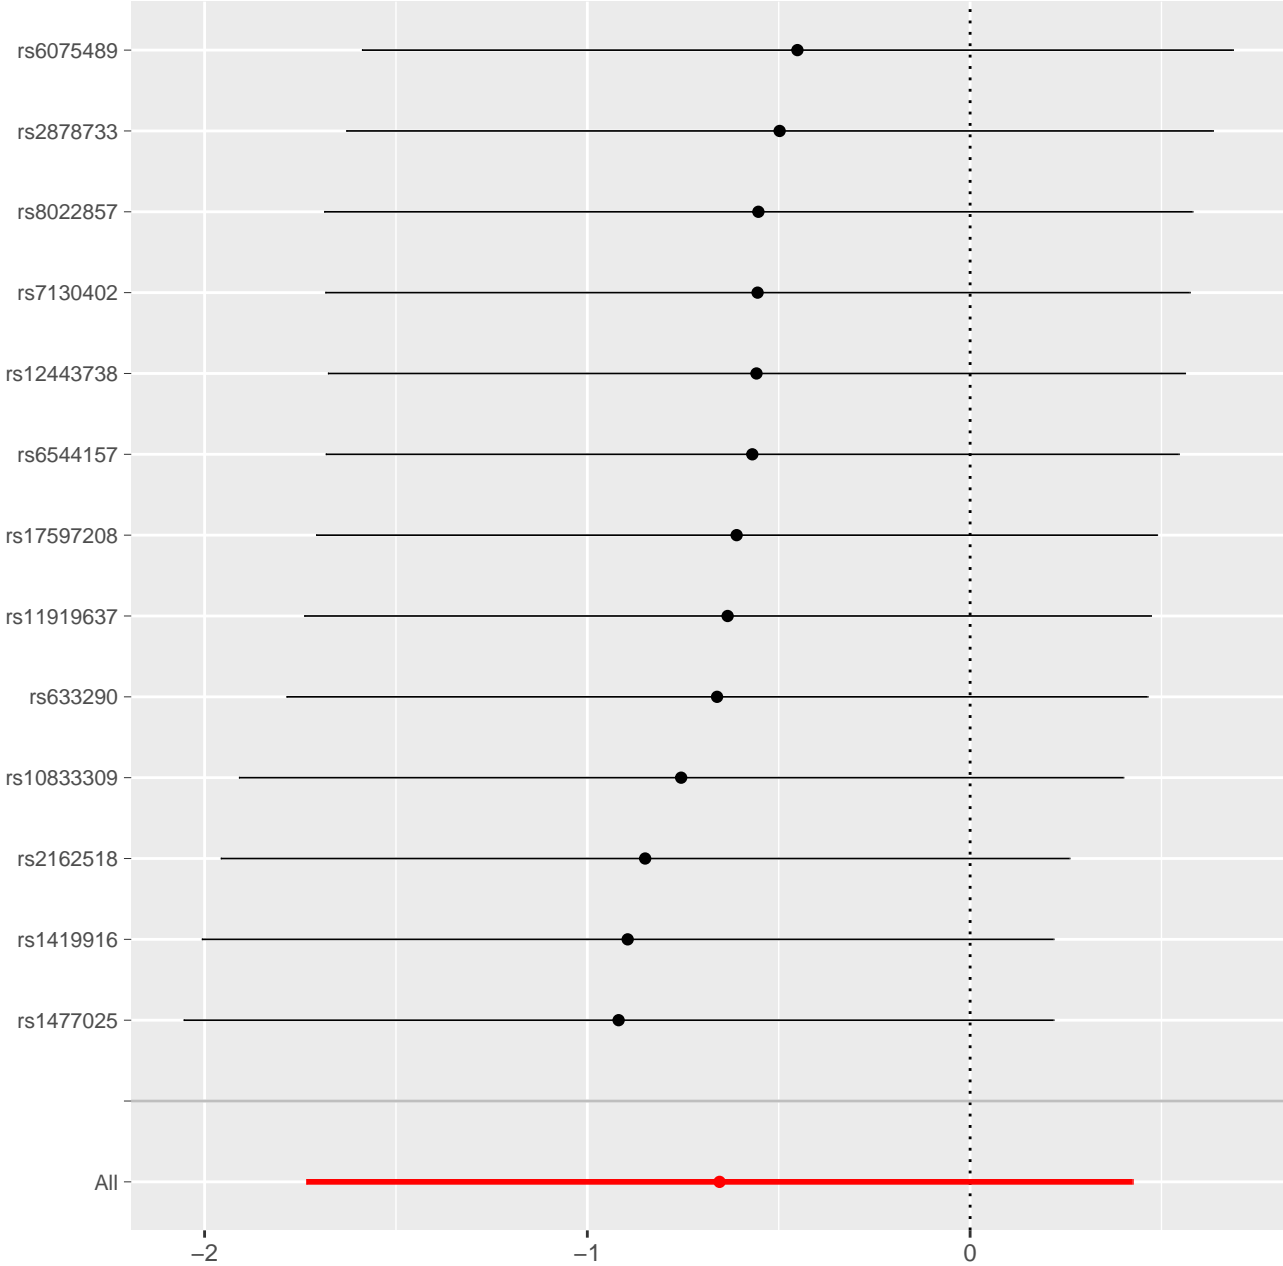

MR leave-one-out sensitivity analysis for 'M34761.metal.pos.txt.gz' on 'JUVEN\_ARTHR.gz'

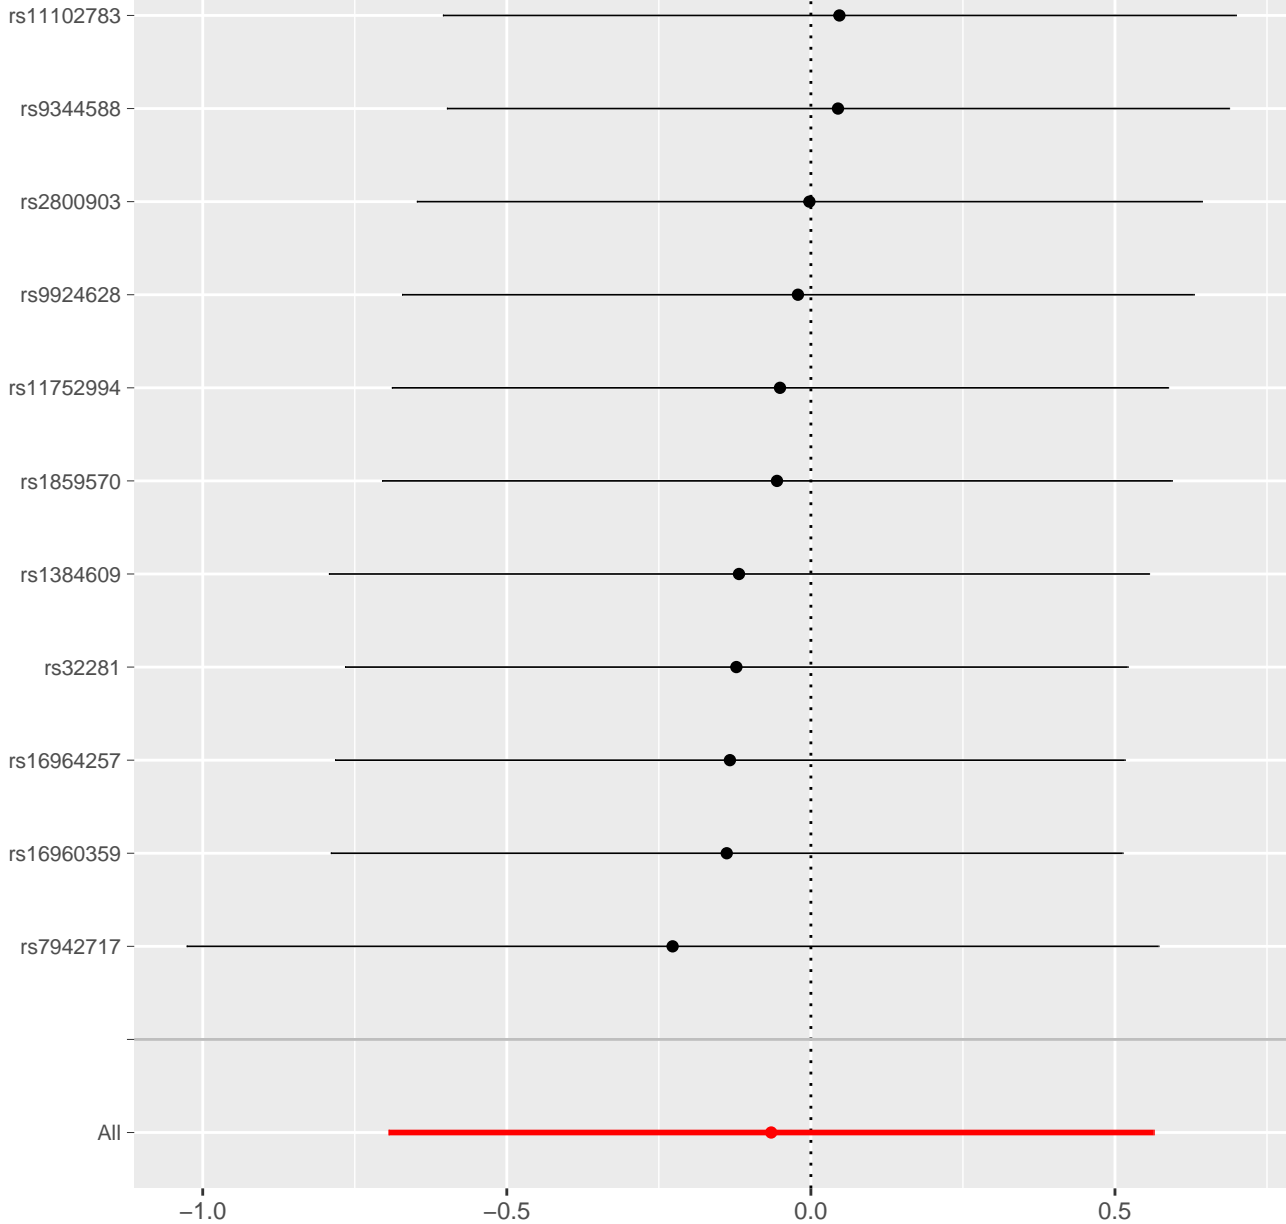

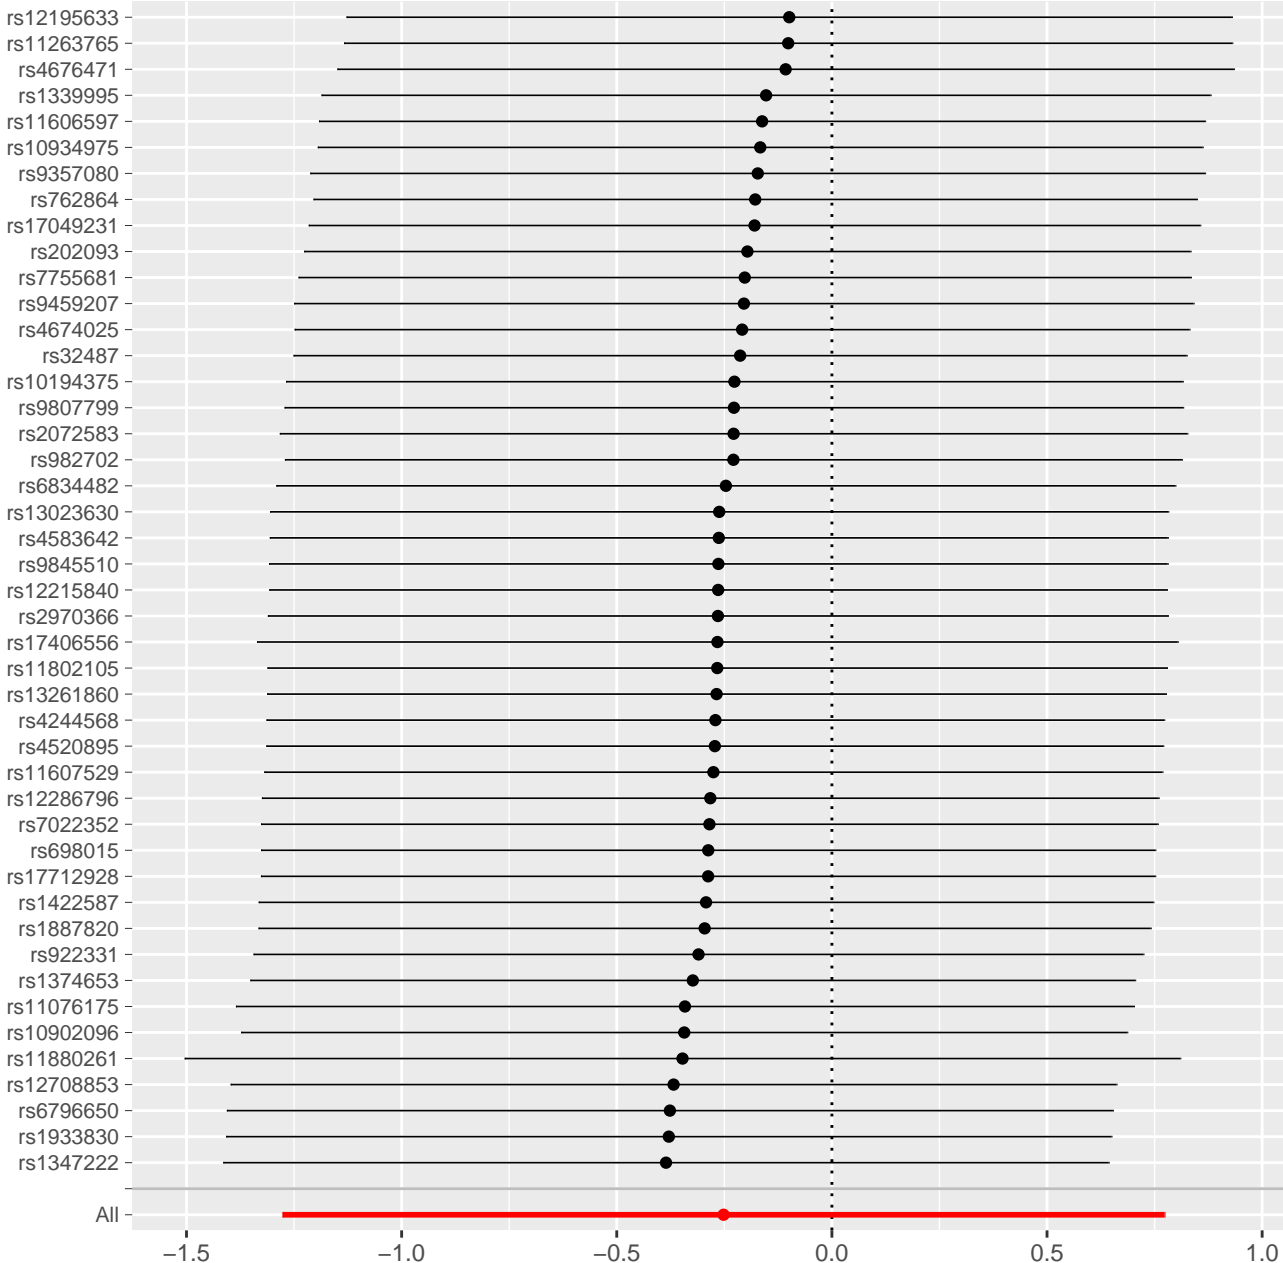

MR leave-one-out sensitivity analysis for 'M34912.metal.pos.txt.gz' on 'JUVEN\_ARTHR.gz'



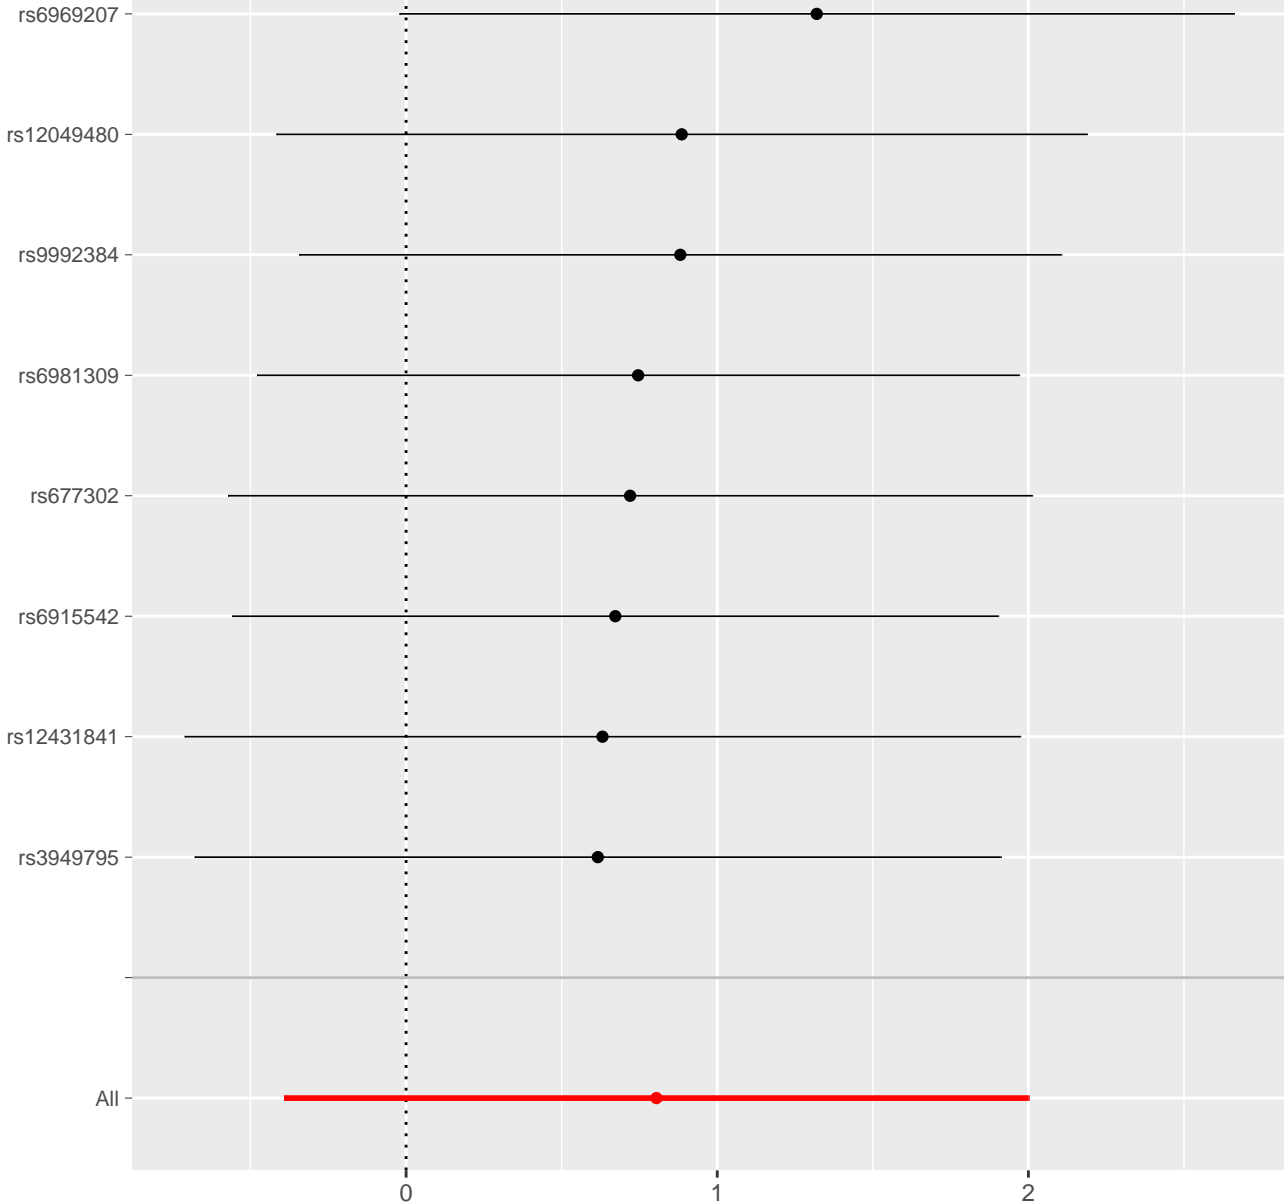

MR leave-one-out sensitivity analysis for 'M35114.metal.pos.txt.gz' on 'JUVEN\_ARTHR.gz'

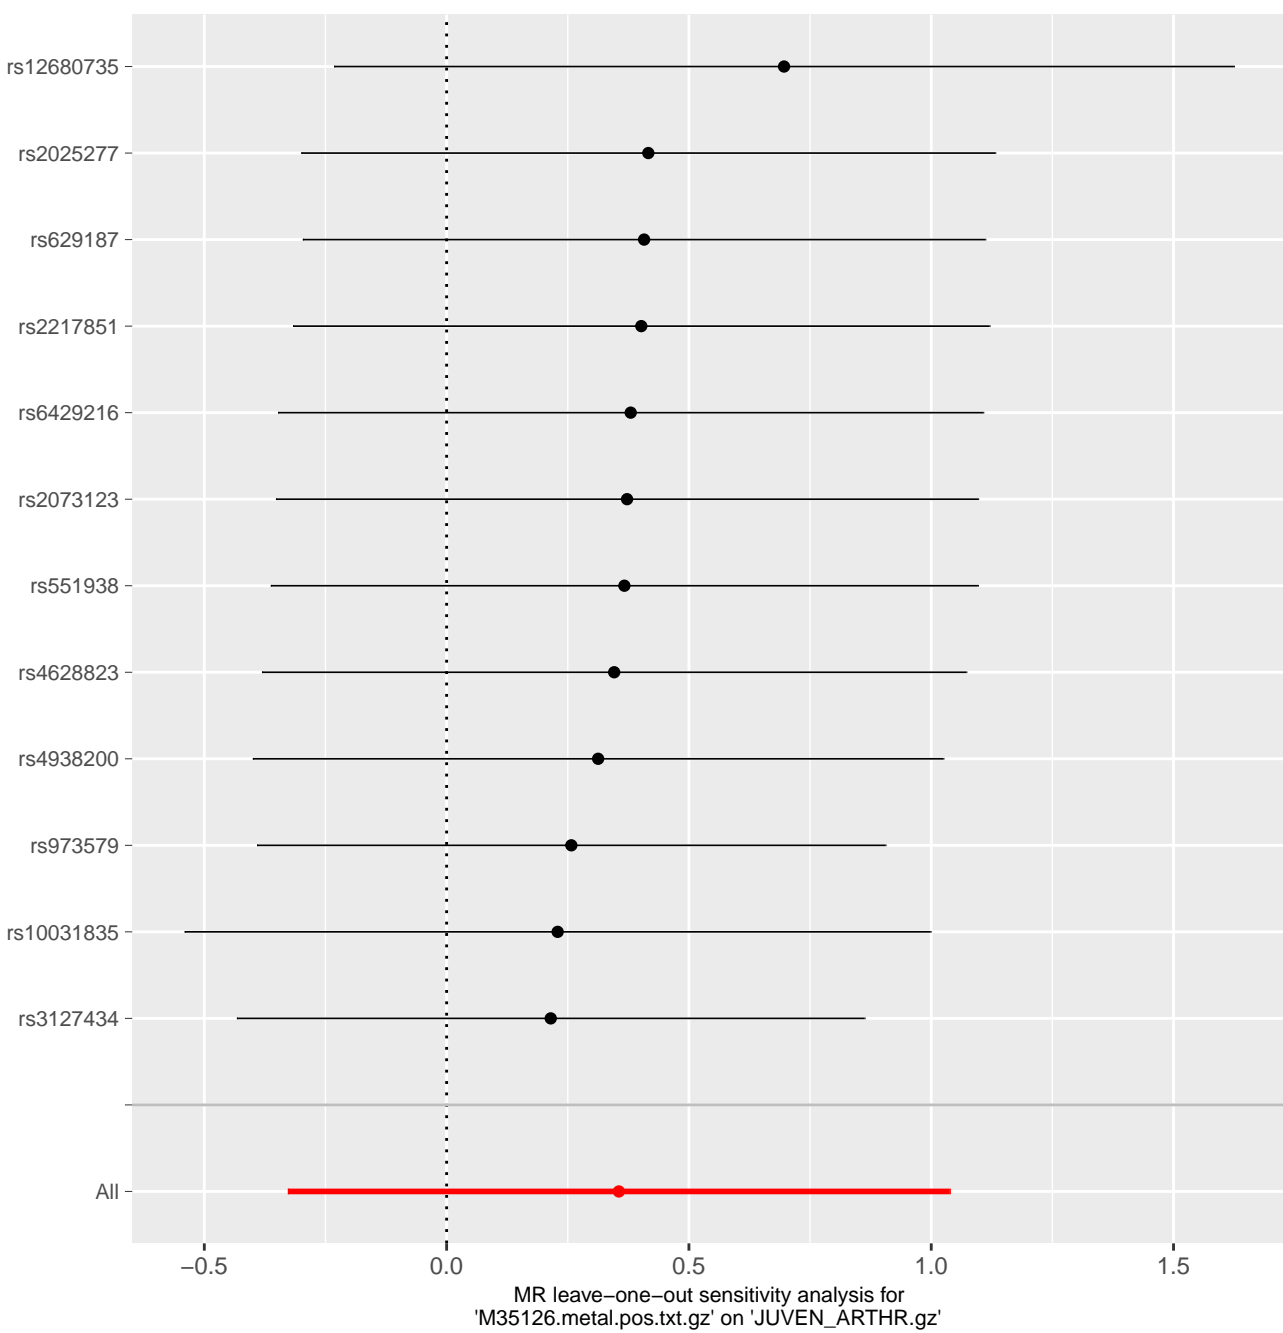

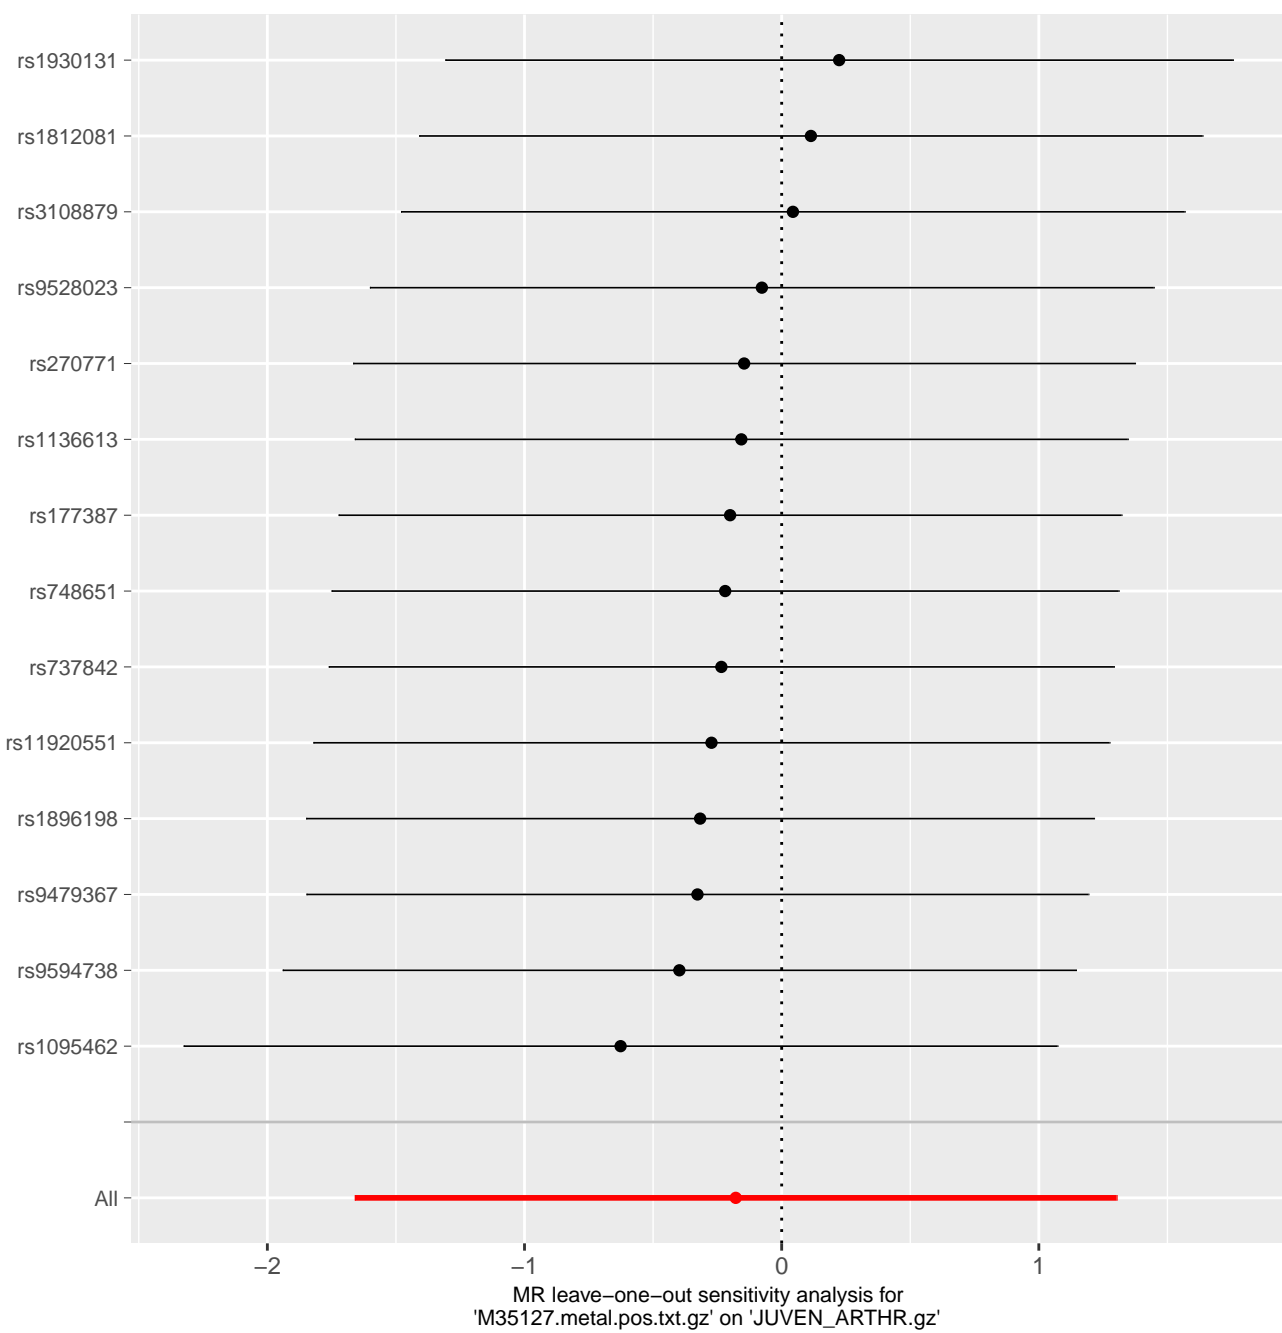

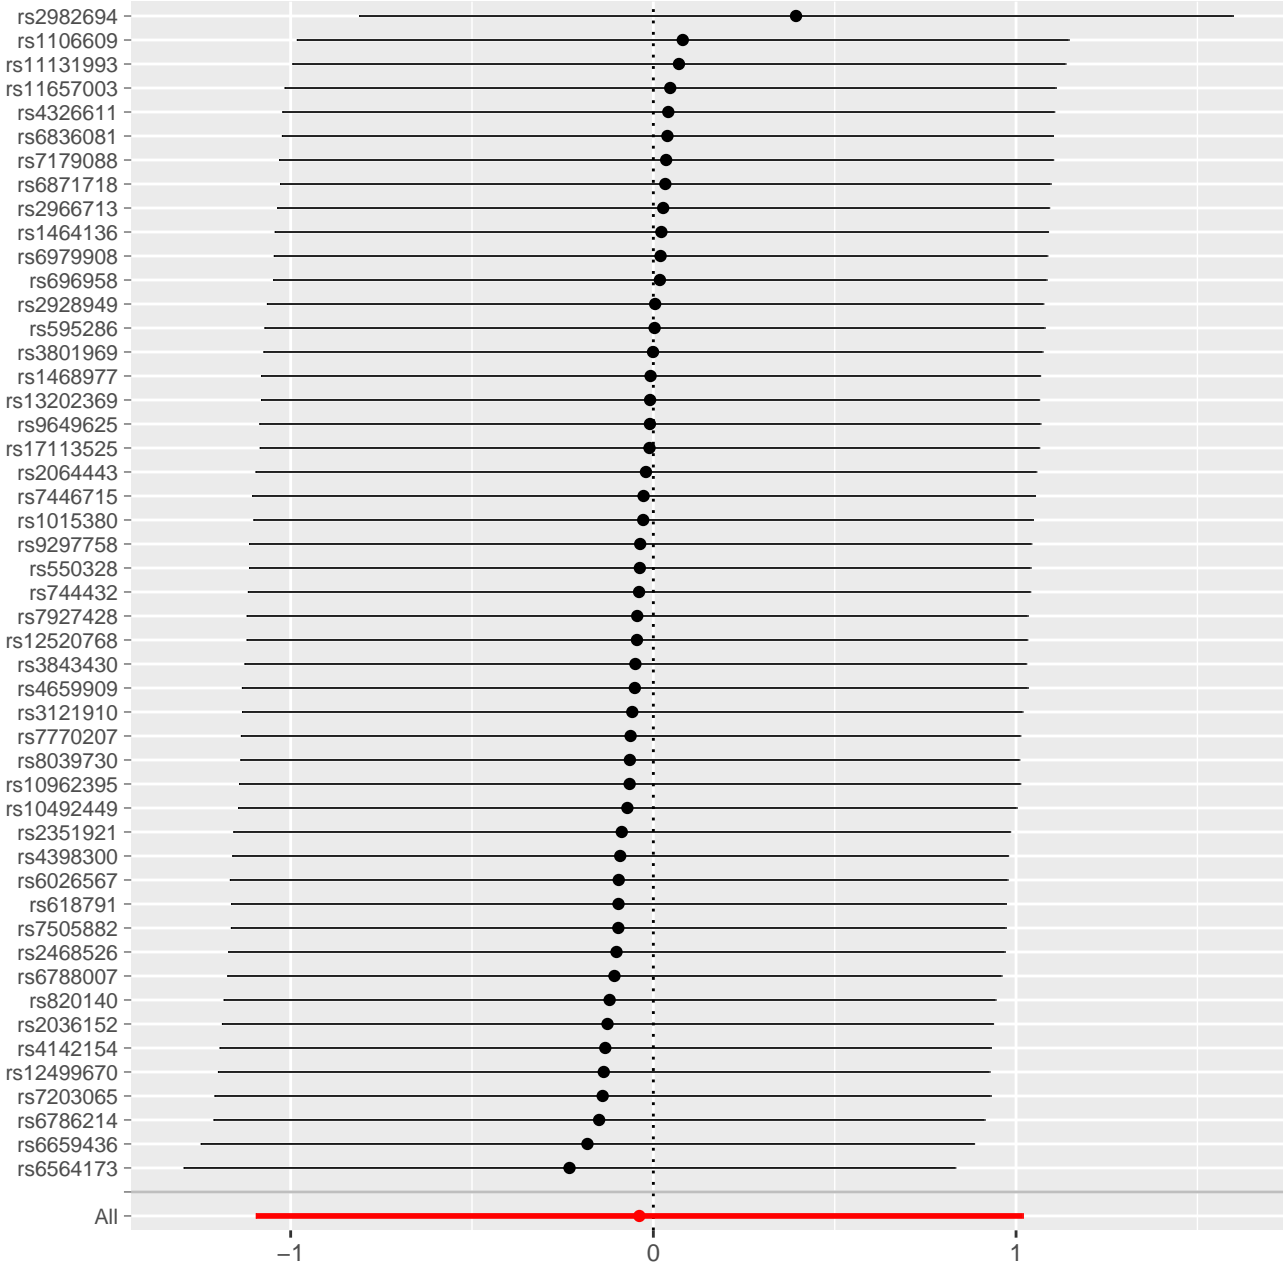

MR leave-one-out sensitivity analysis for 'M35137.metal.pos.txt.gz' on 'JUVEN\_ARTHR.gz'

rs11150072

rs2688

rs4758441

rs4340260

rs12260890

rs12895662

rs5760492

rs7218918

All

-0.5

0.0

0.5

1.0

MR leave-one-out sensitivity analysis for  
'M35159.metal.pos.txt.gz' on 'JUVEN\_ARTHR.gz'

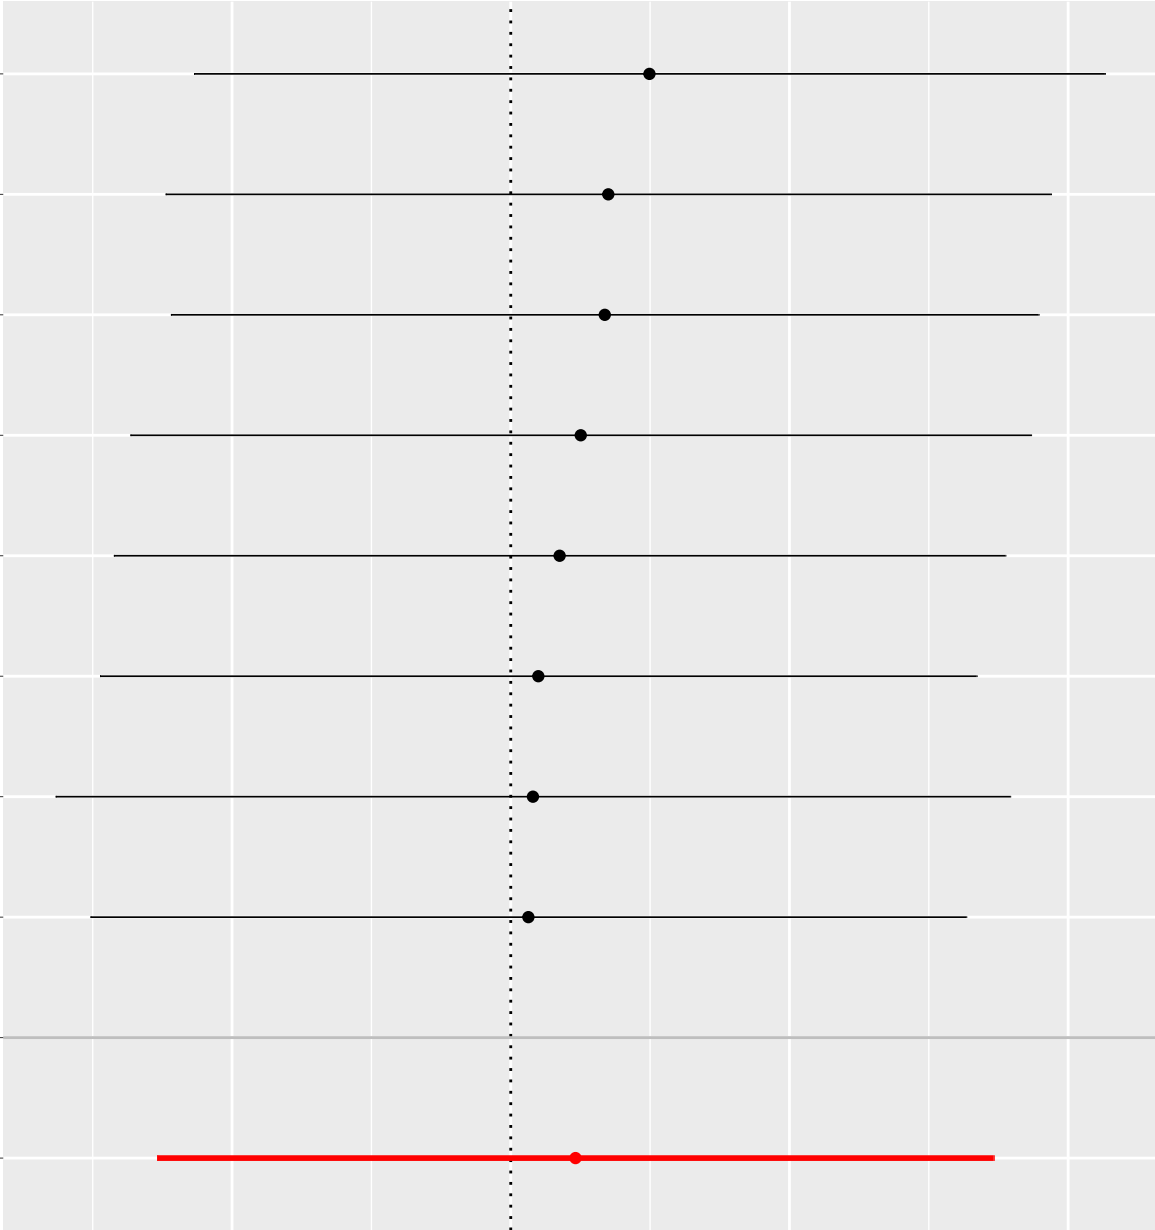

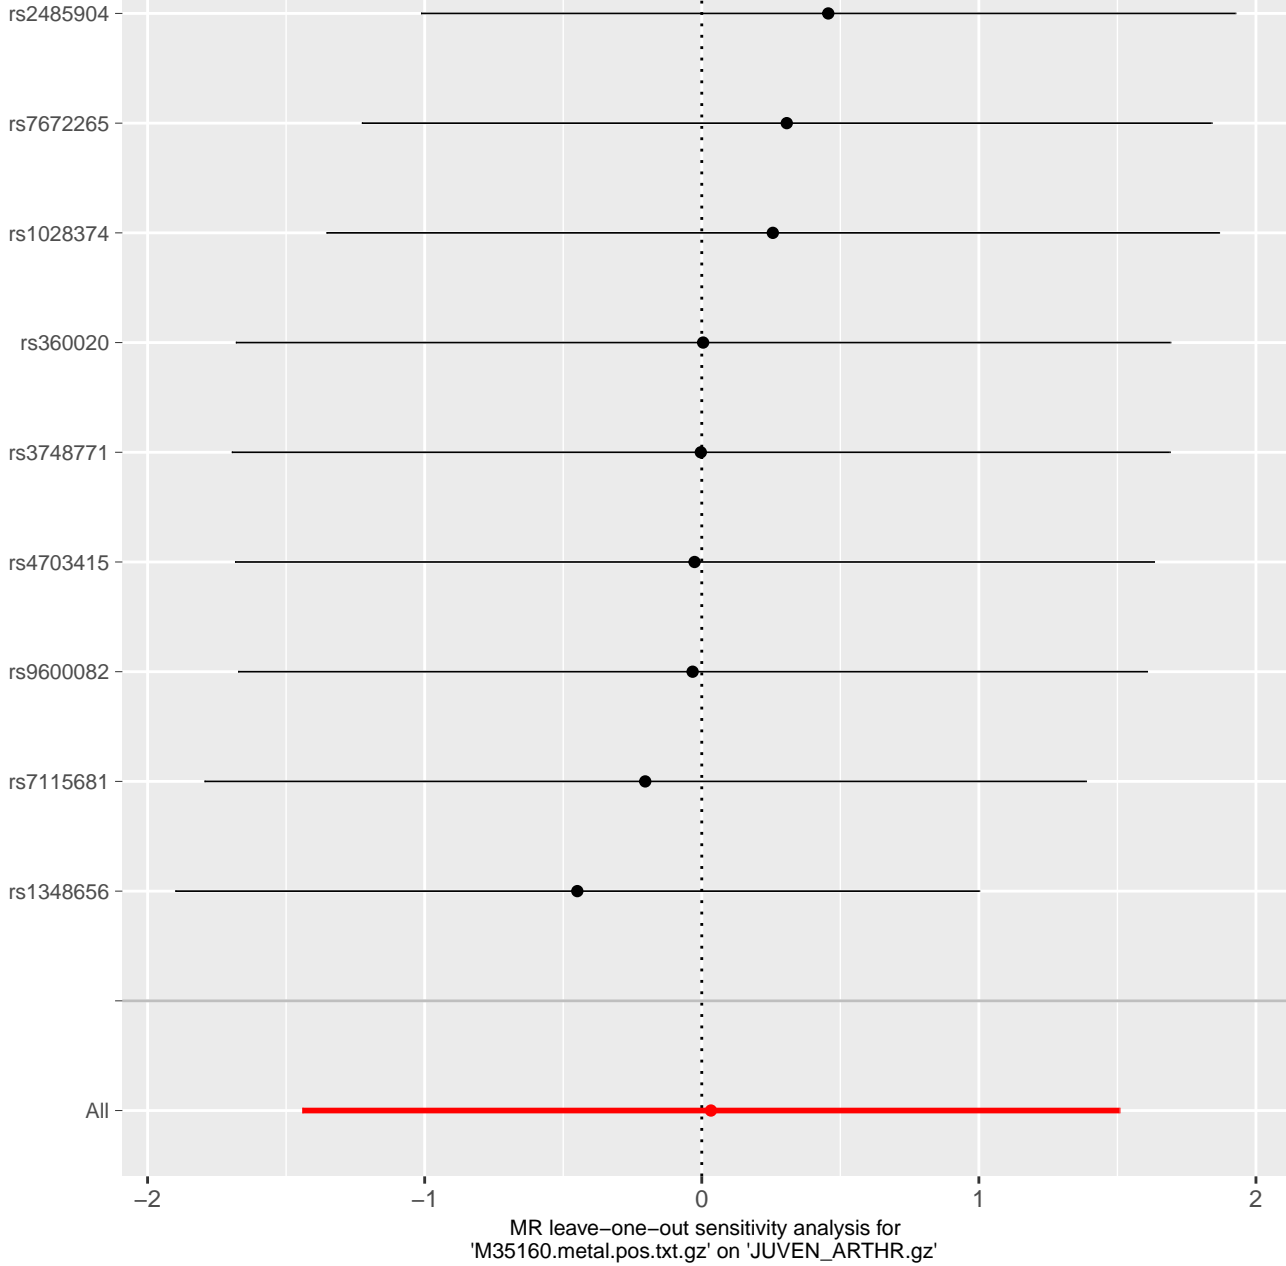

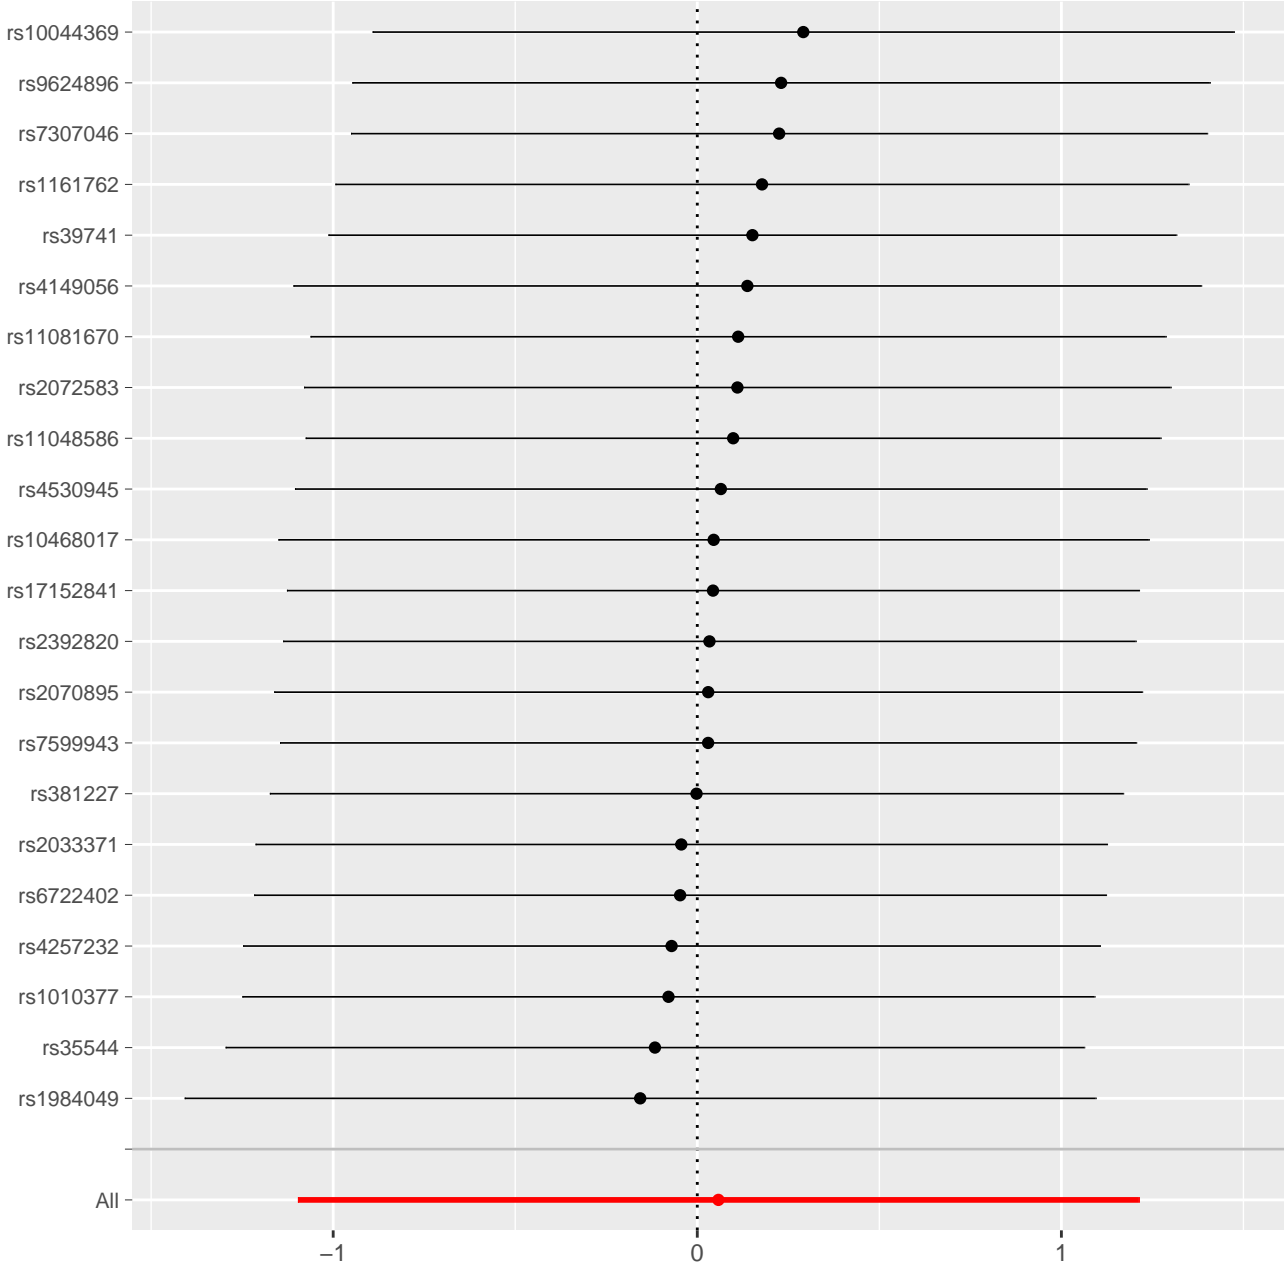

MR leave-one-out sensitivity analysis for 'M35186.metal.pos.txt.gz' on 'JUVEN\_ARTHR.gz'

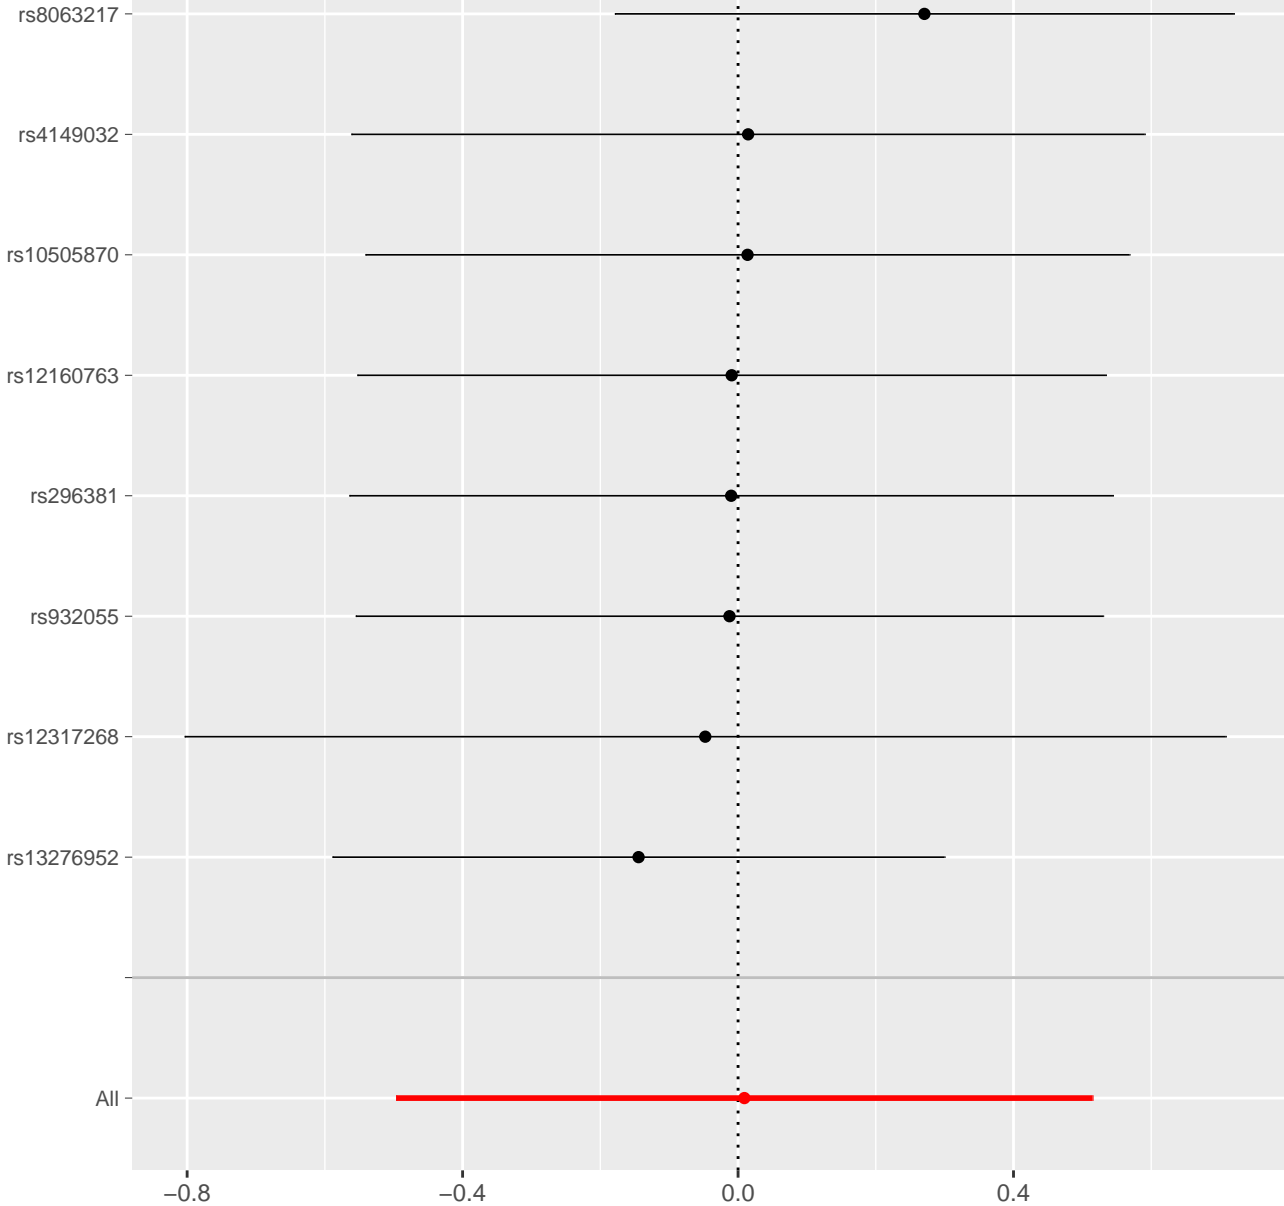

MR leave-one-out sensitivity analysis for 'M35187.metal.pos.txt.gz' on 'JUVEN\_ARTHR.gz'



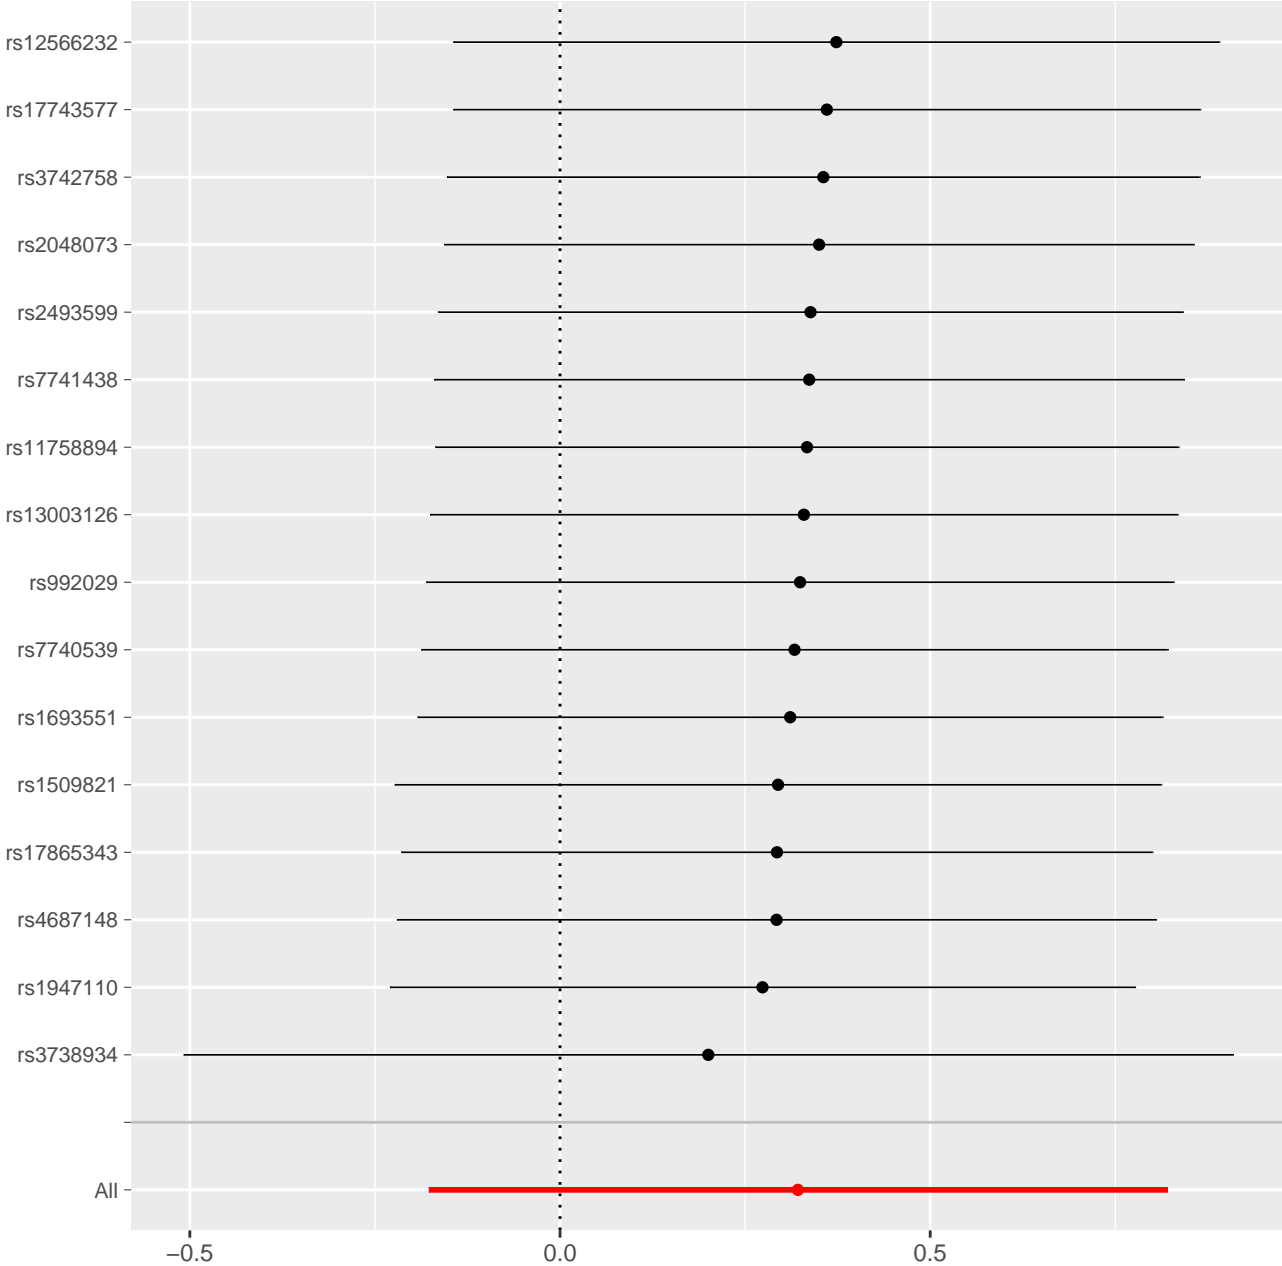

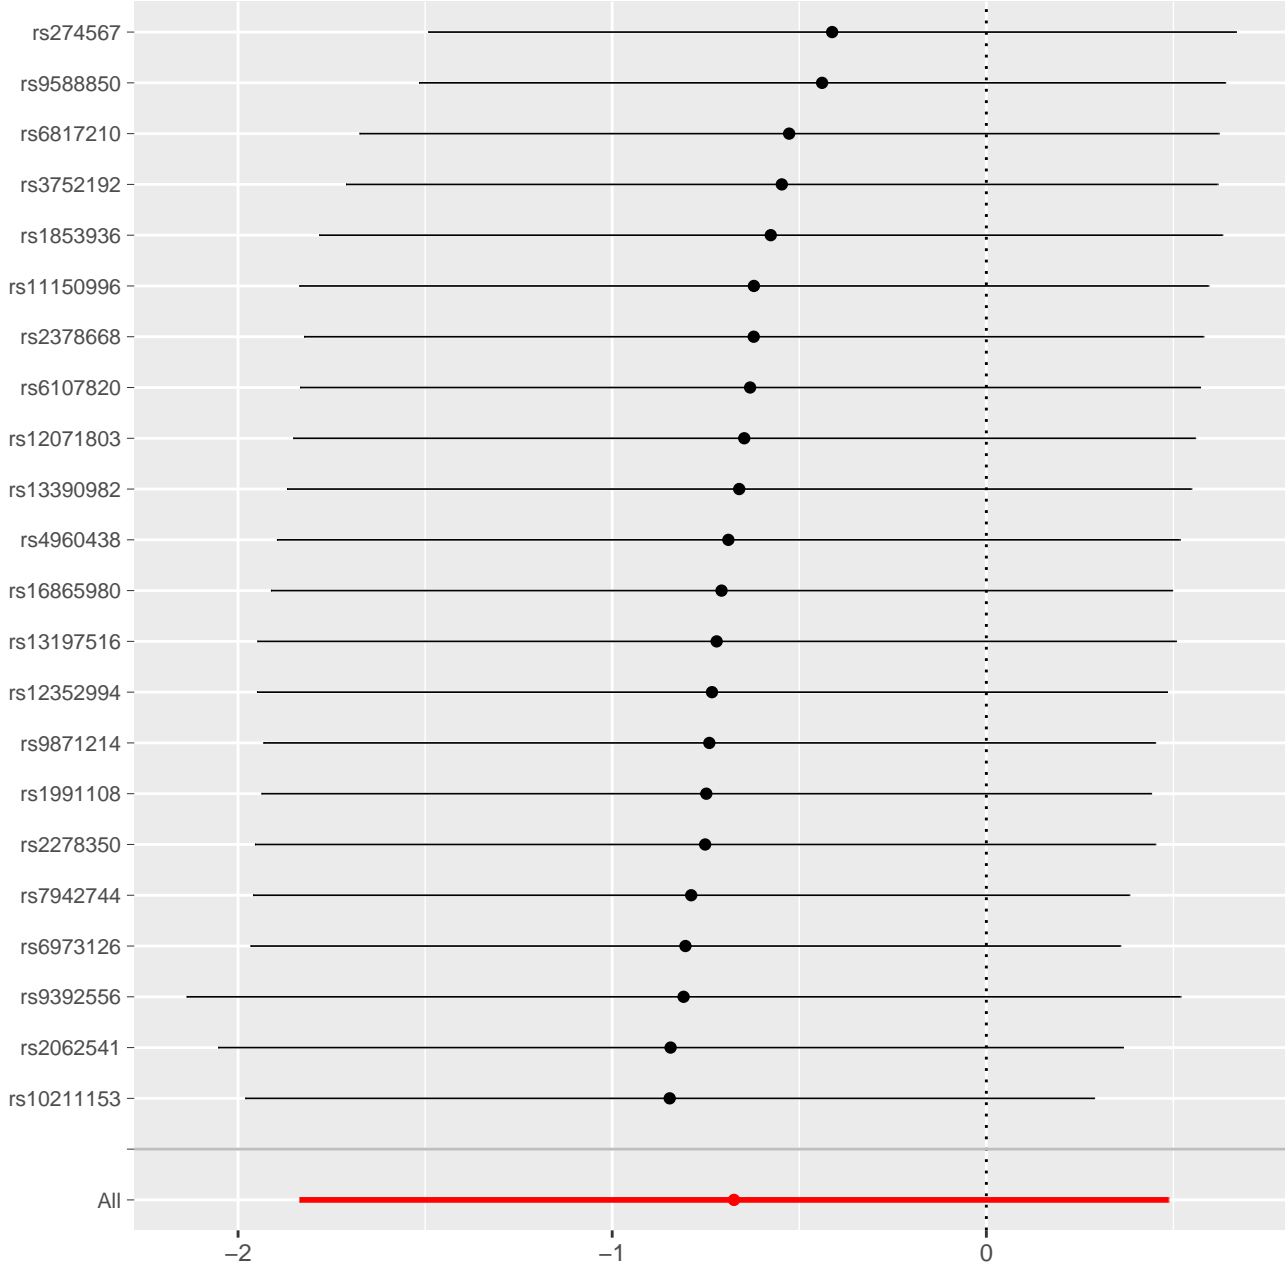

MR leave-one-out sensitivity analysis for 'M35193.metal.pos.txt.gz' on 'JUVEN\_ARTHR.gz'

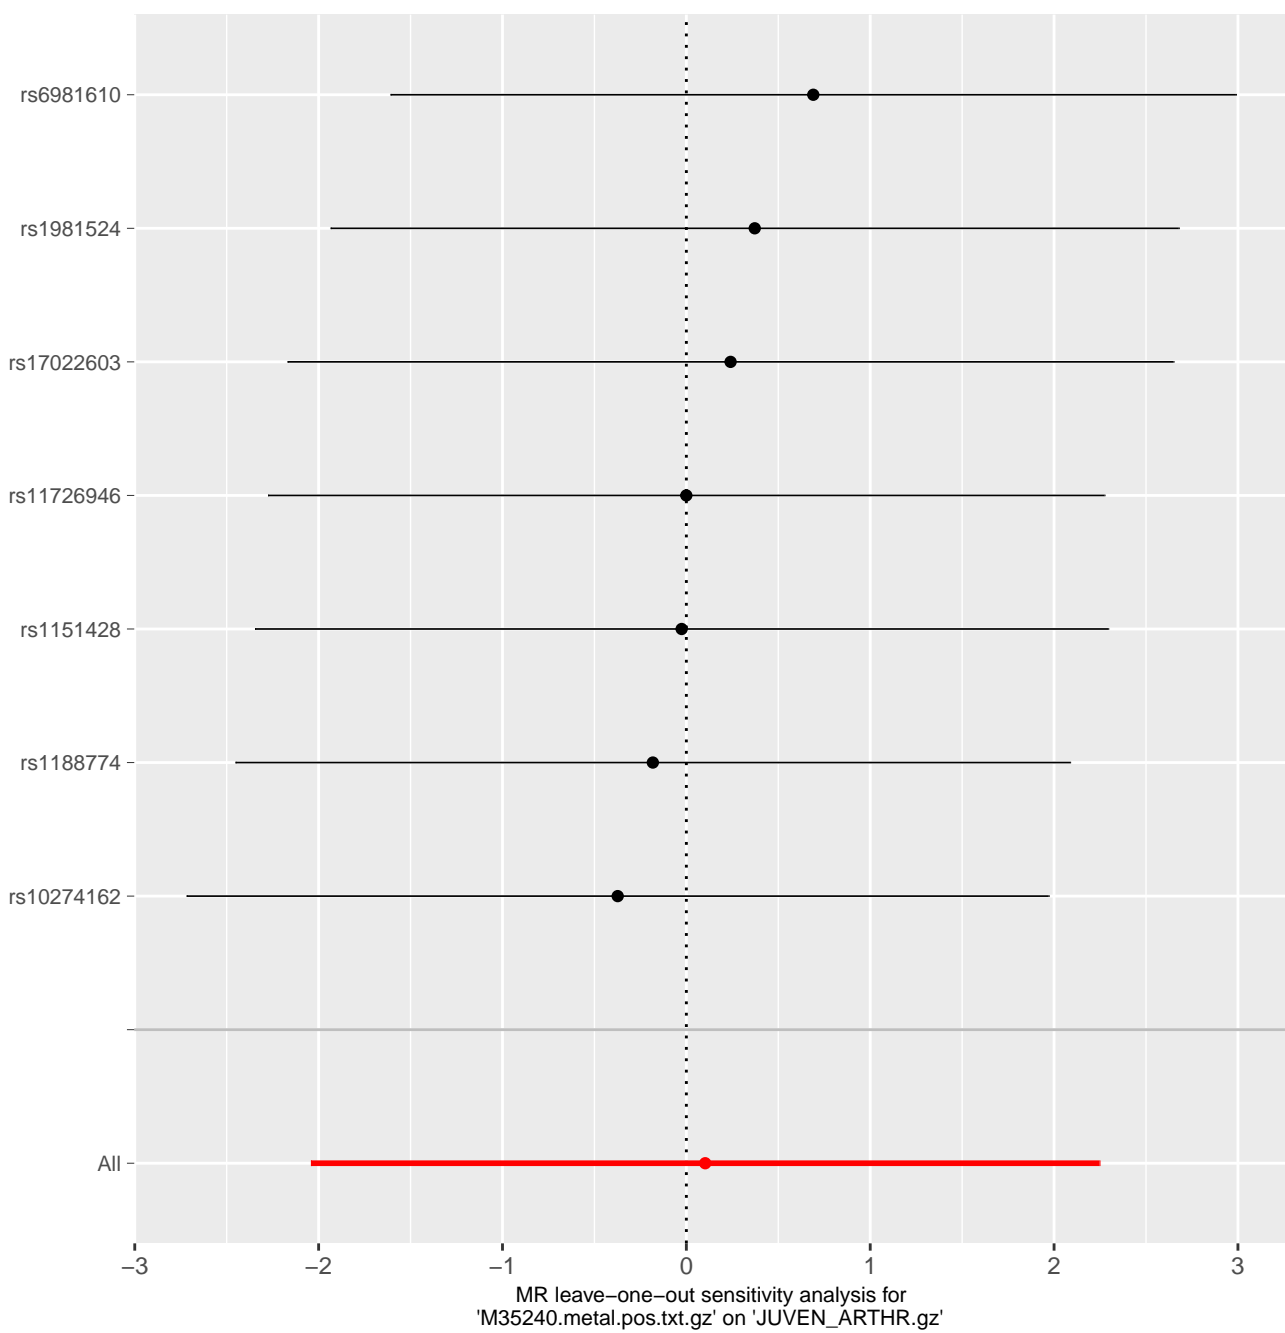

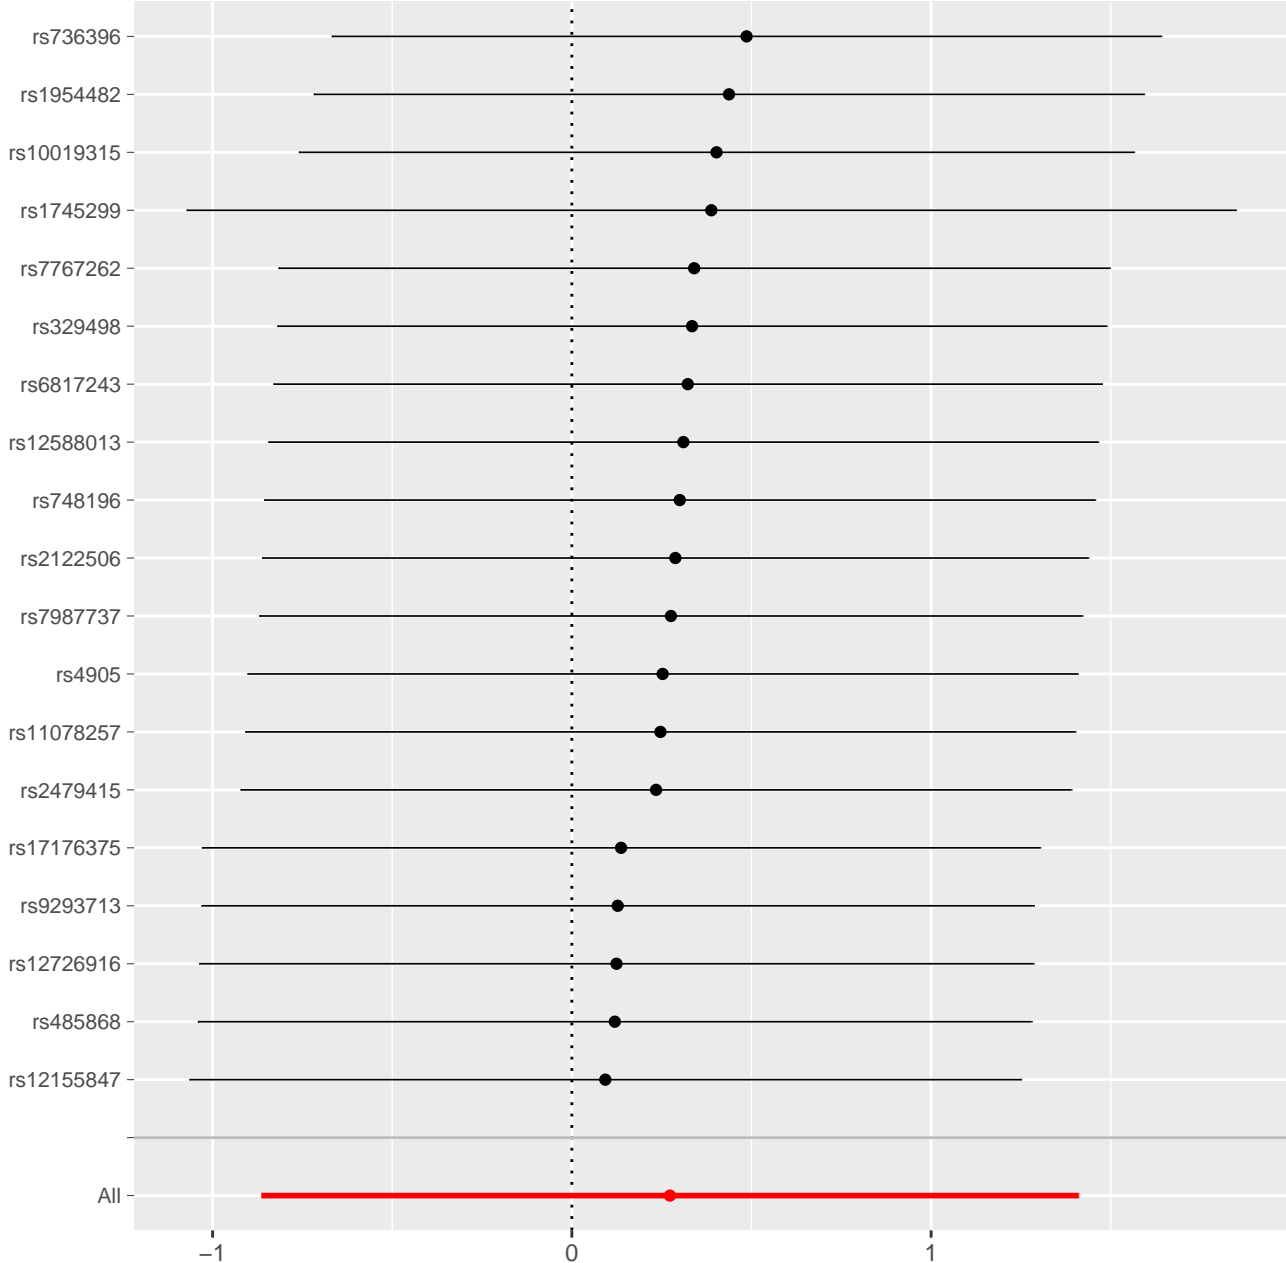

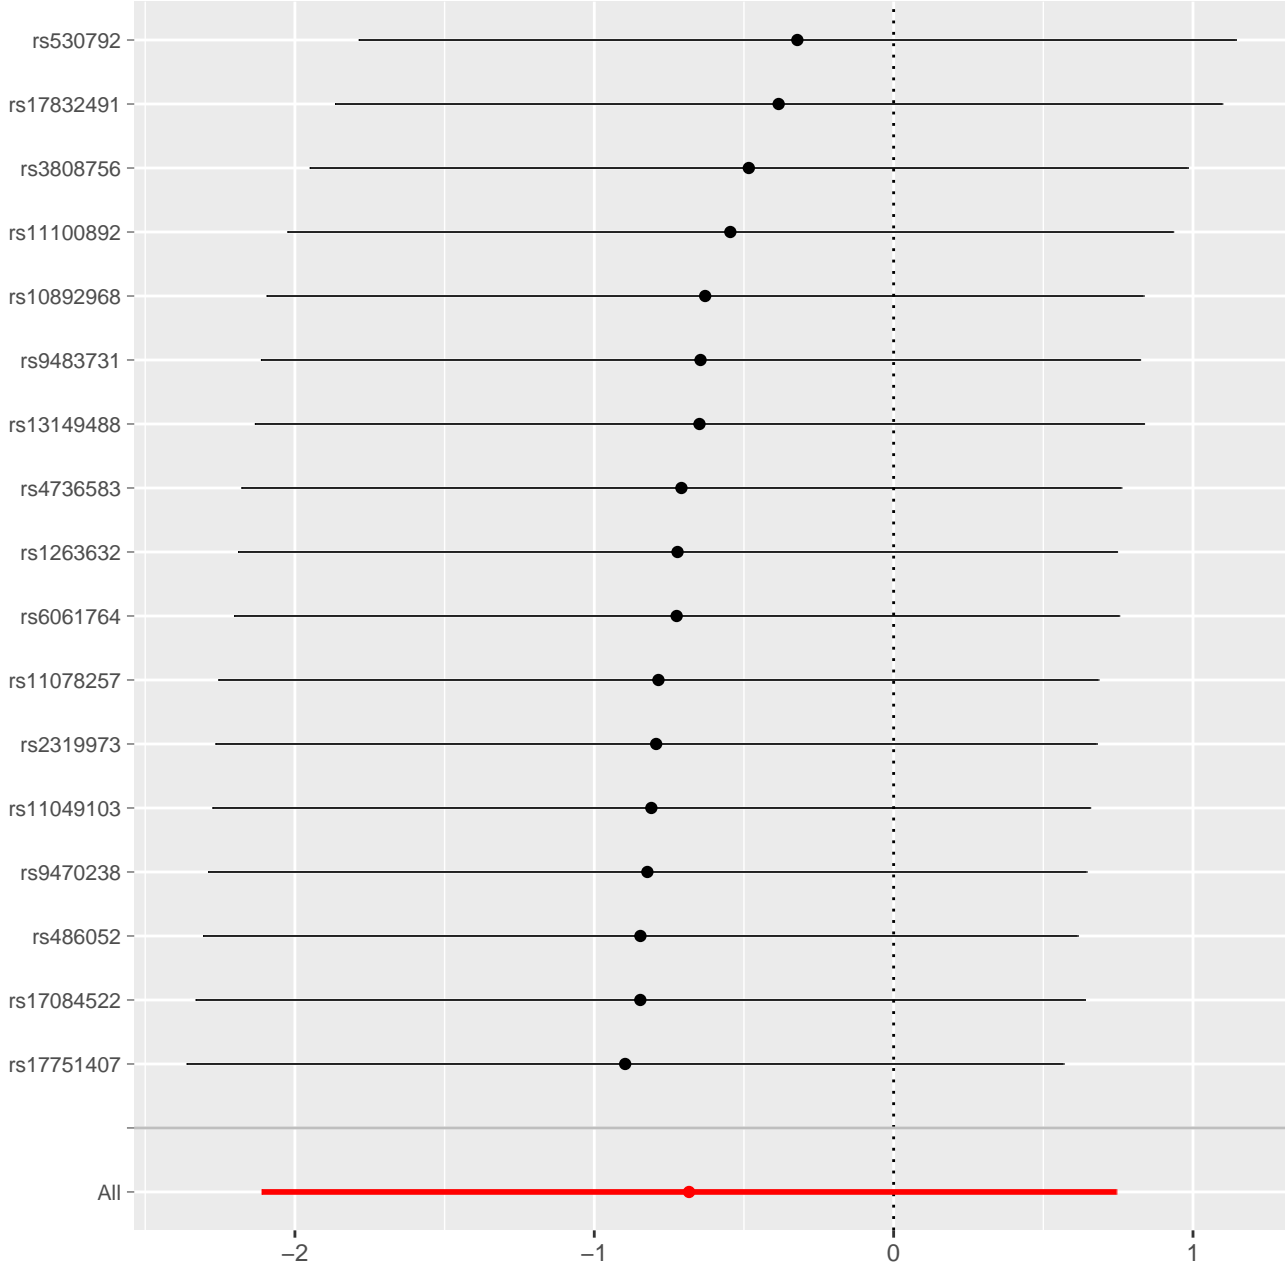

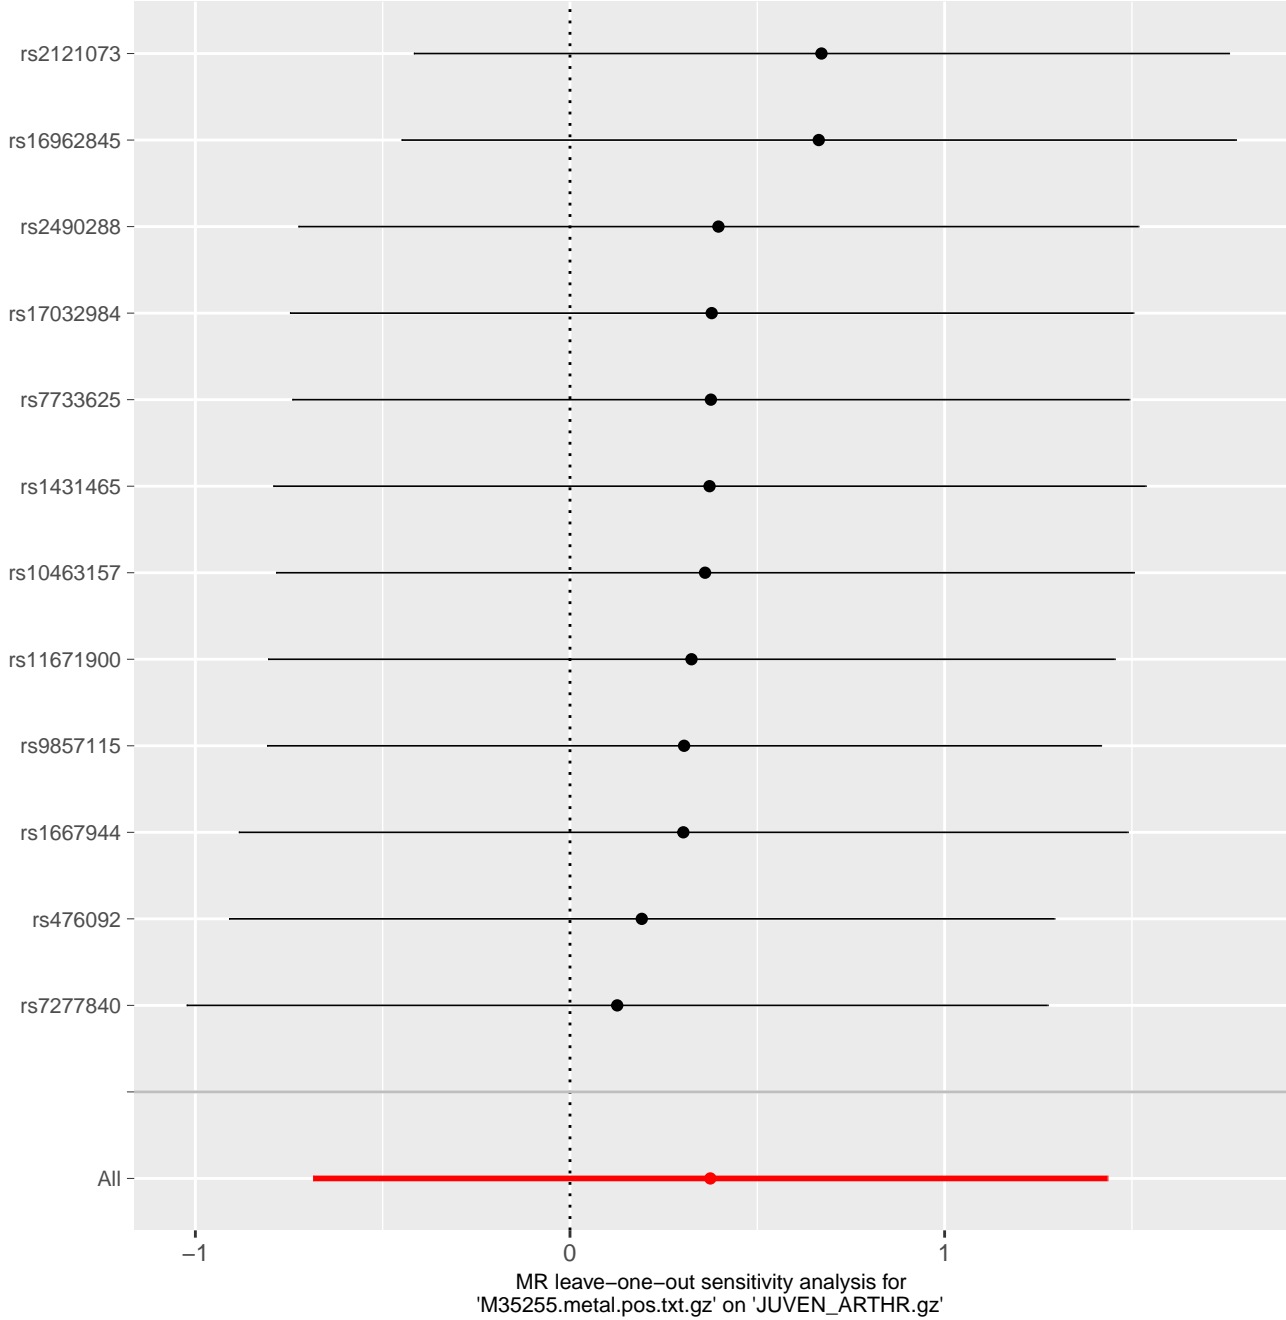

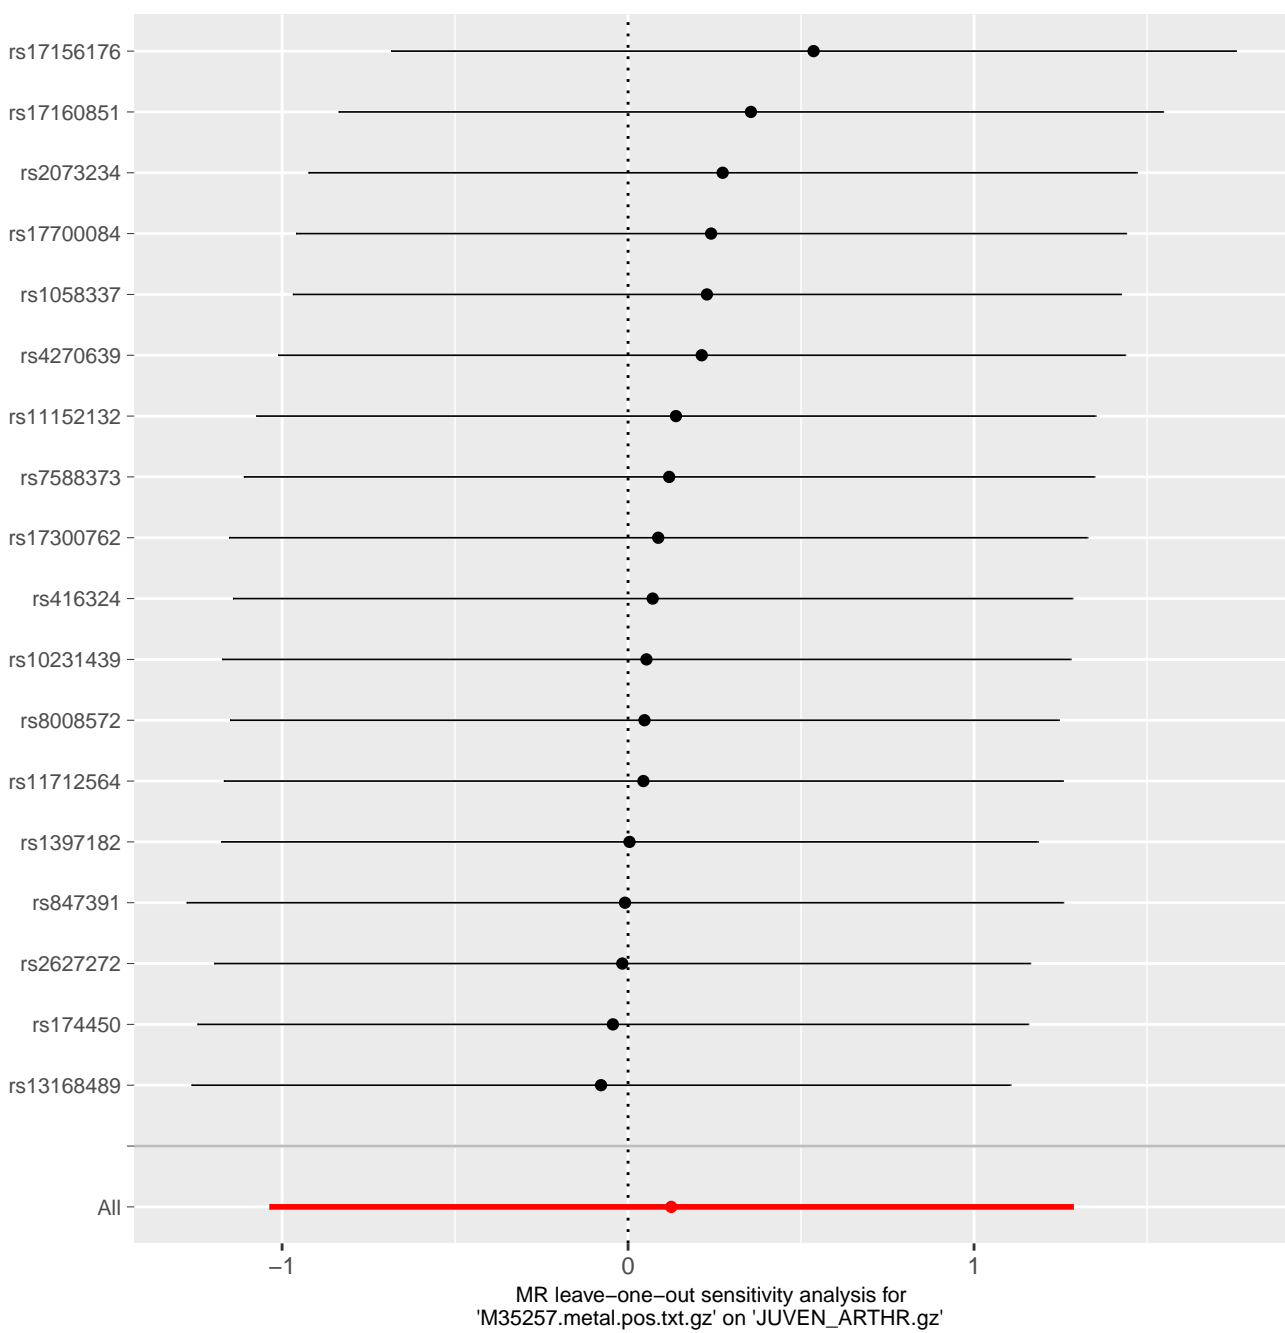

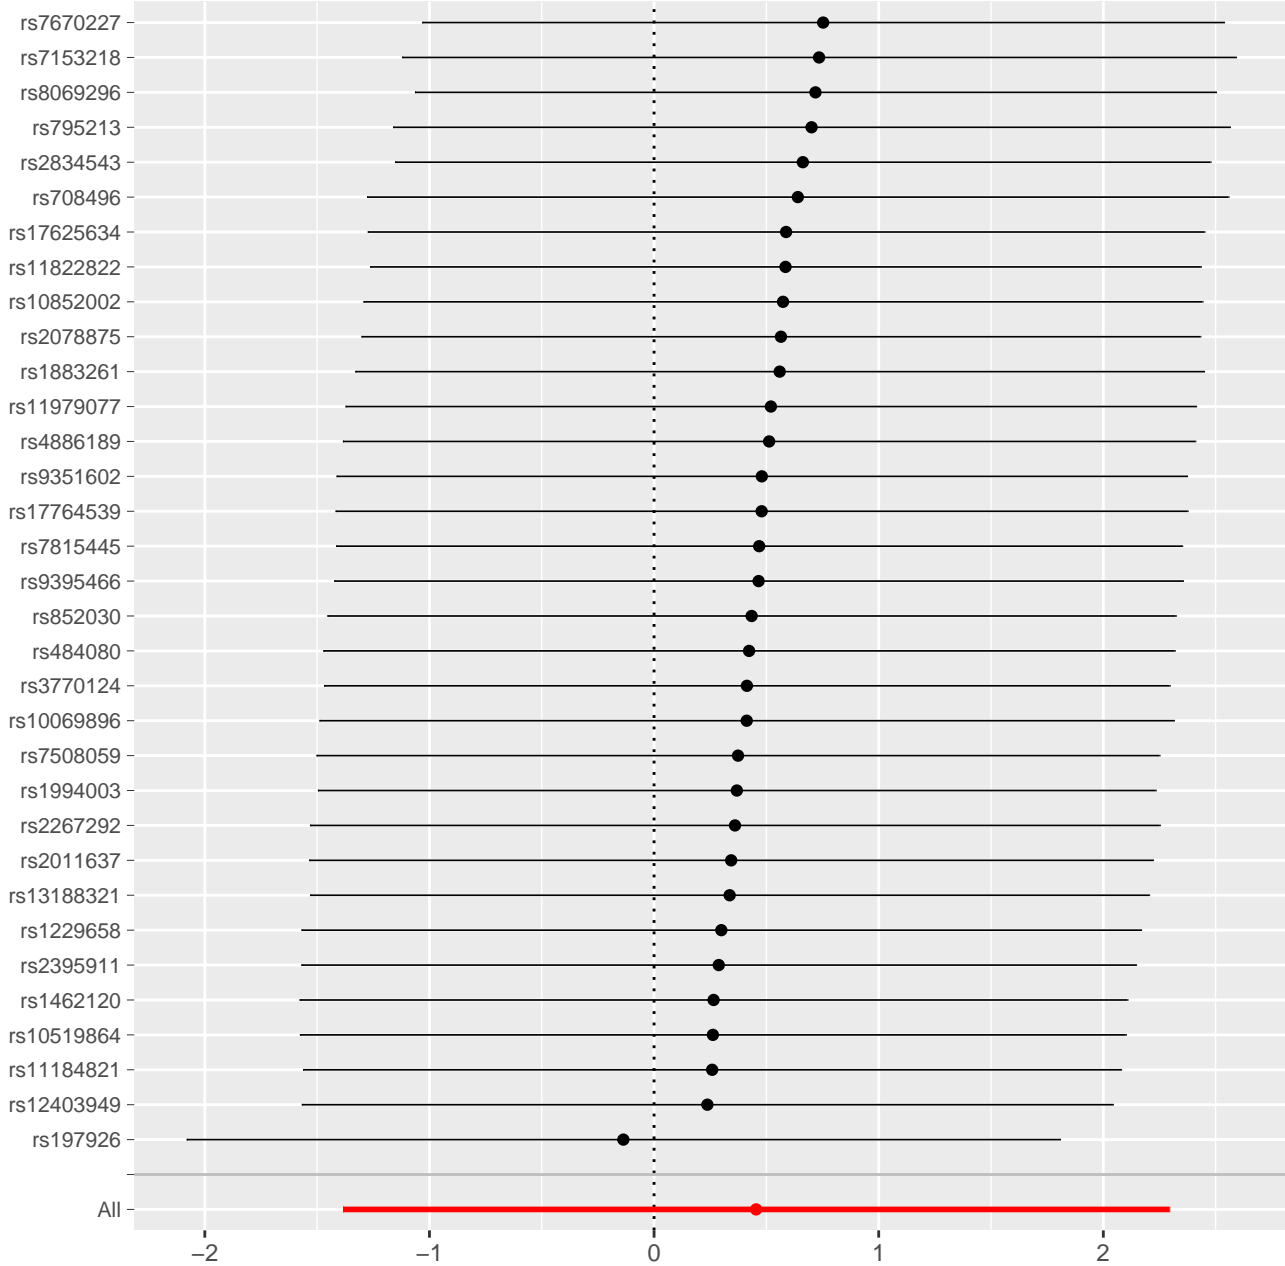

MR leave-one-out sensitivity analysis for 'M35270.metal.pos.txt.gz' on 'JUVEN\_ARTHR.gz'



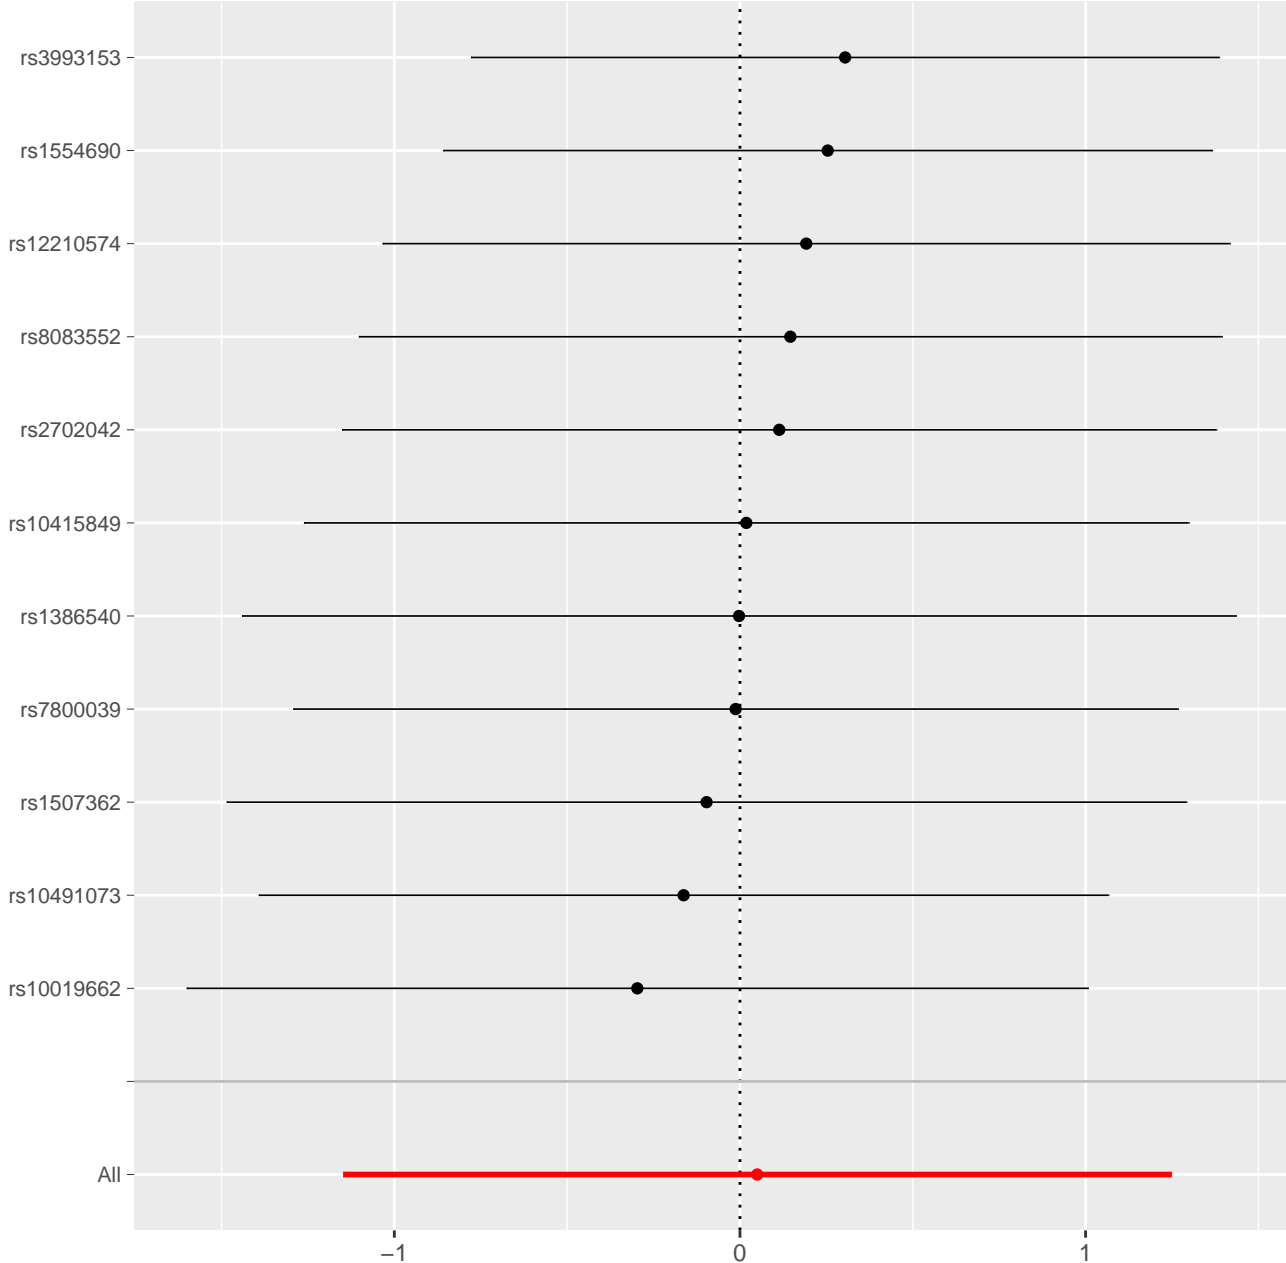

MR leave-one-out sensitivity analysis for 'M35305.metal.pos.txt.gz' on 'JUVEN\_ARTHR.gz'

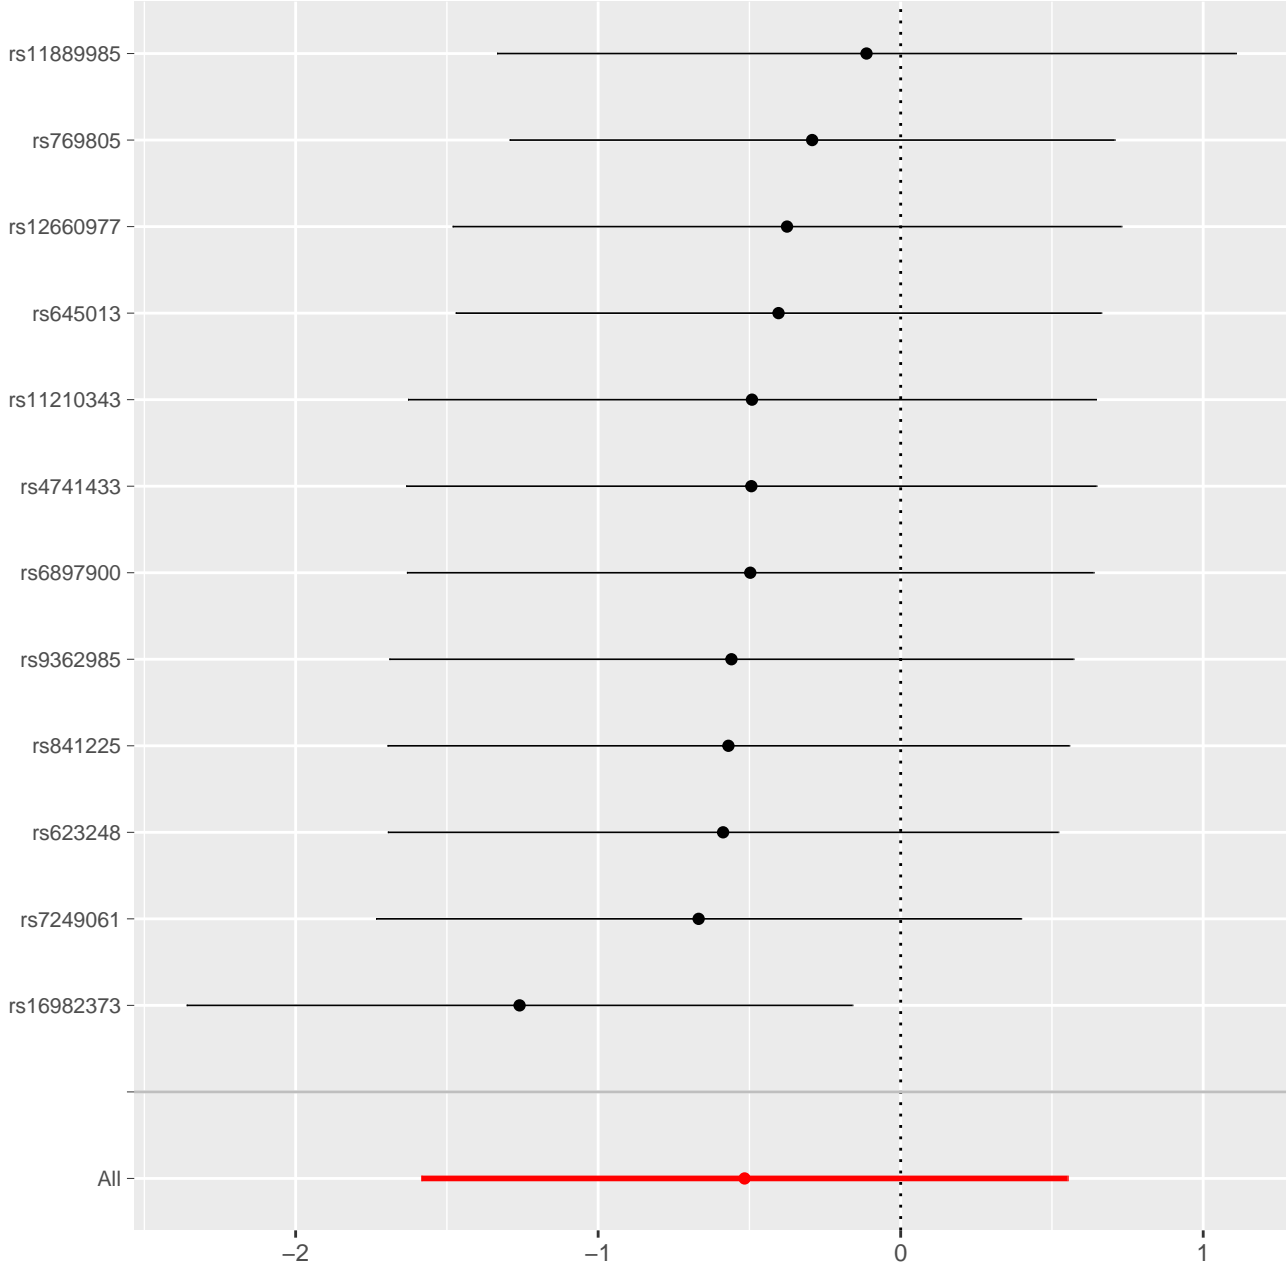

MR leave-one-out sensitivity analysis for 'M35320.metal.pos.txt.gz' on 'JUVEN\_ARTHR.gz'

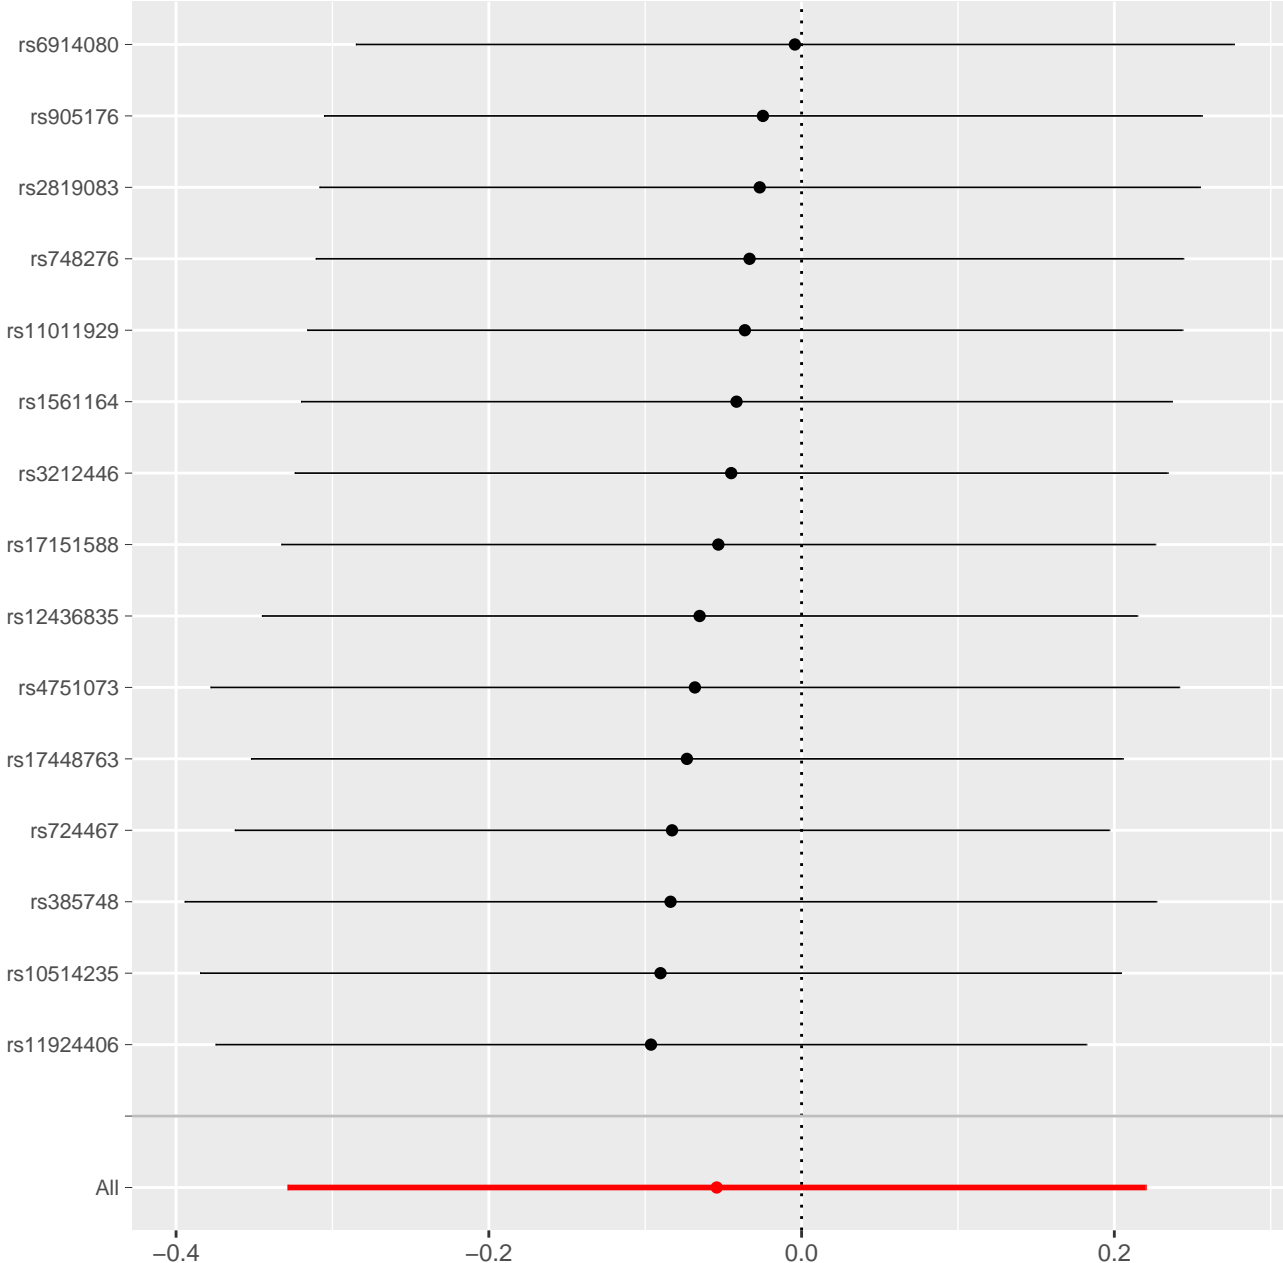

MR leave-one-out sensitivity analysis for 'M35322.metal.pos.txt.gz' on 'JUVEN\_ARTHR.gz'

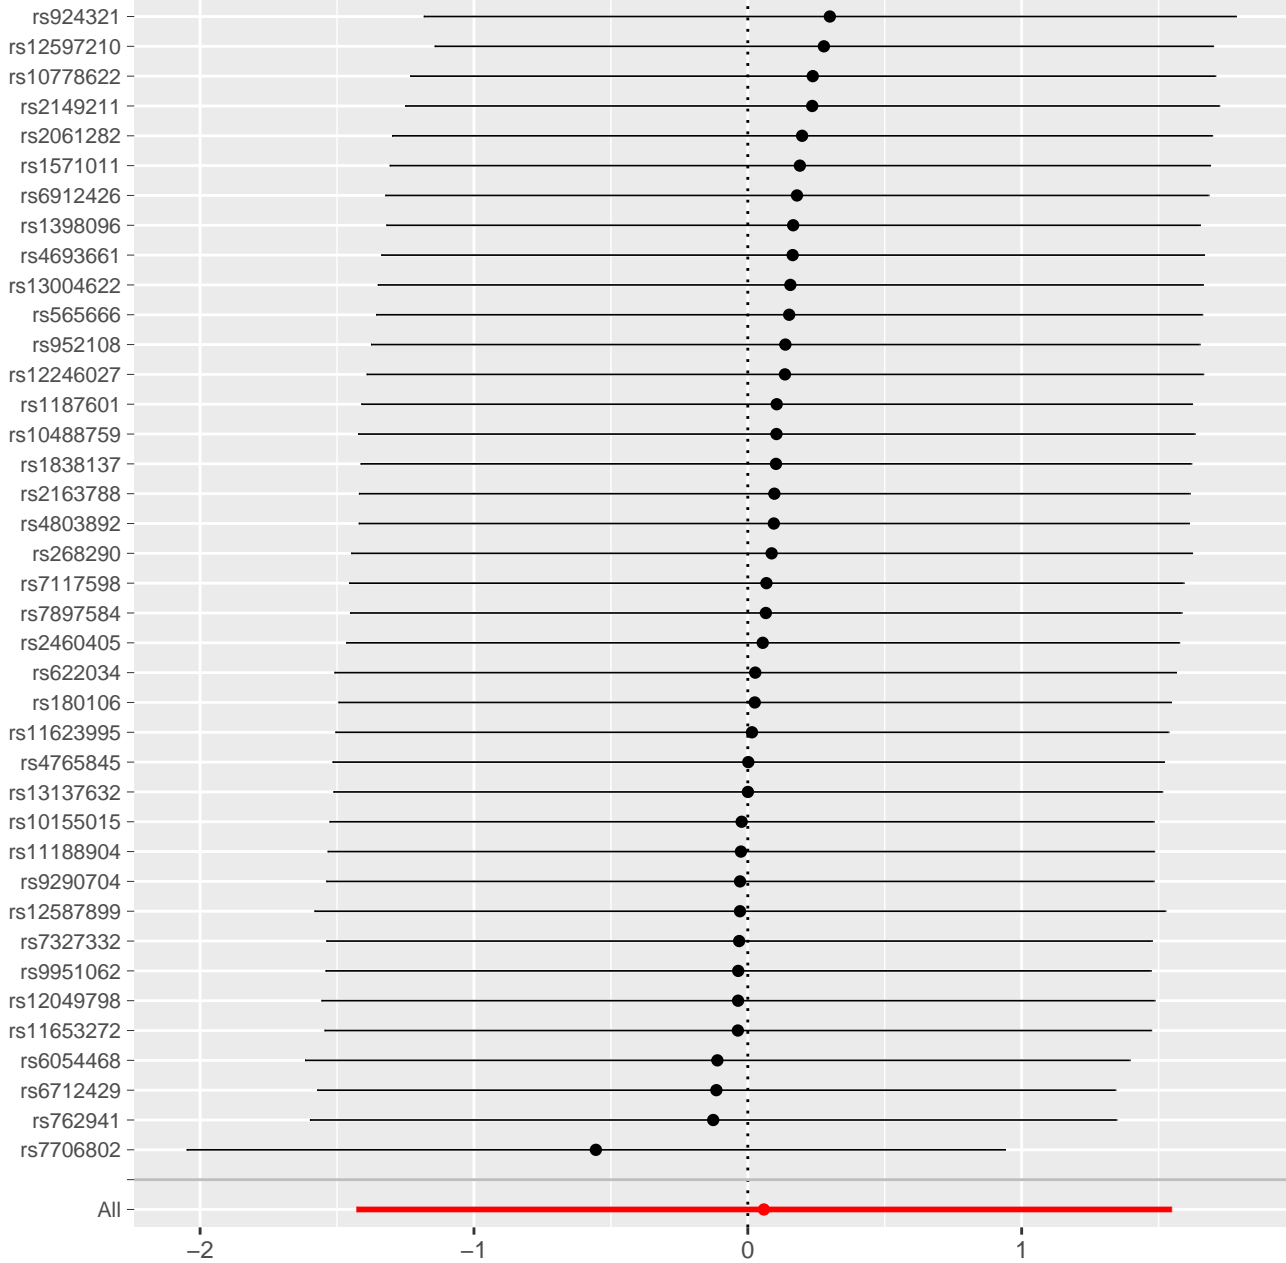

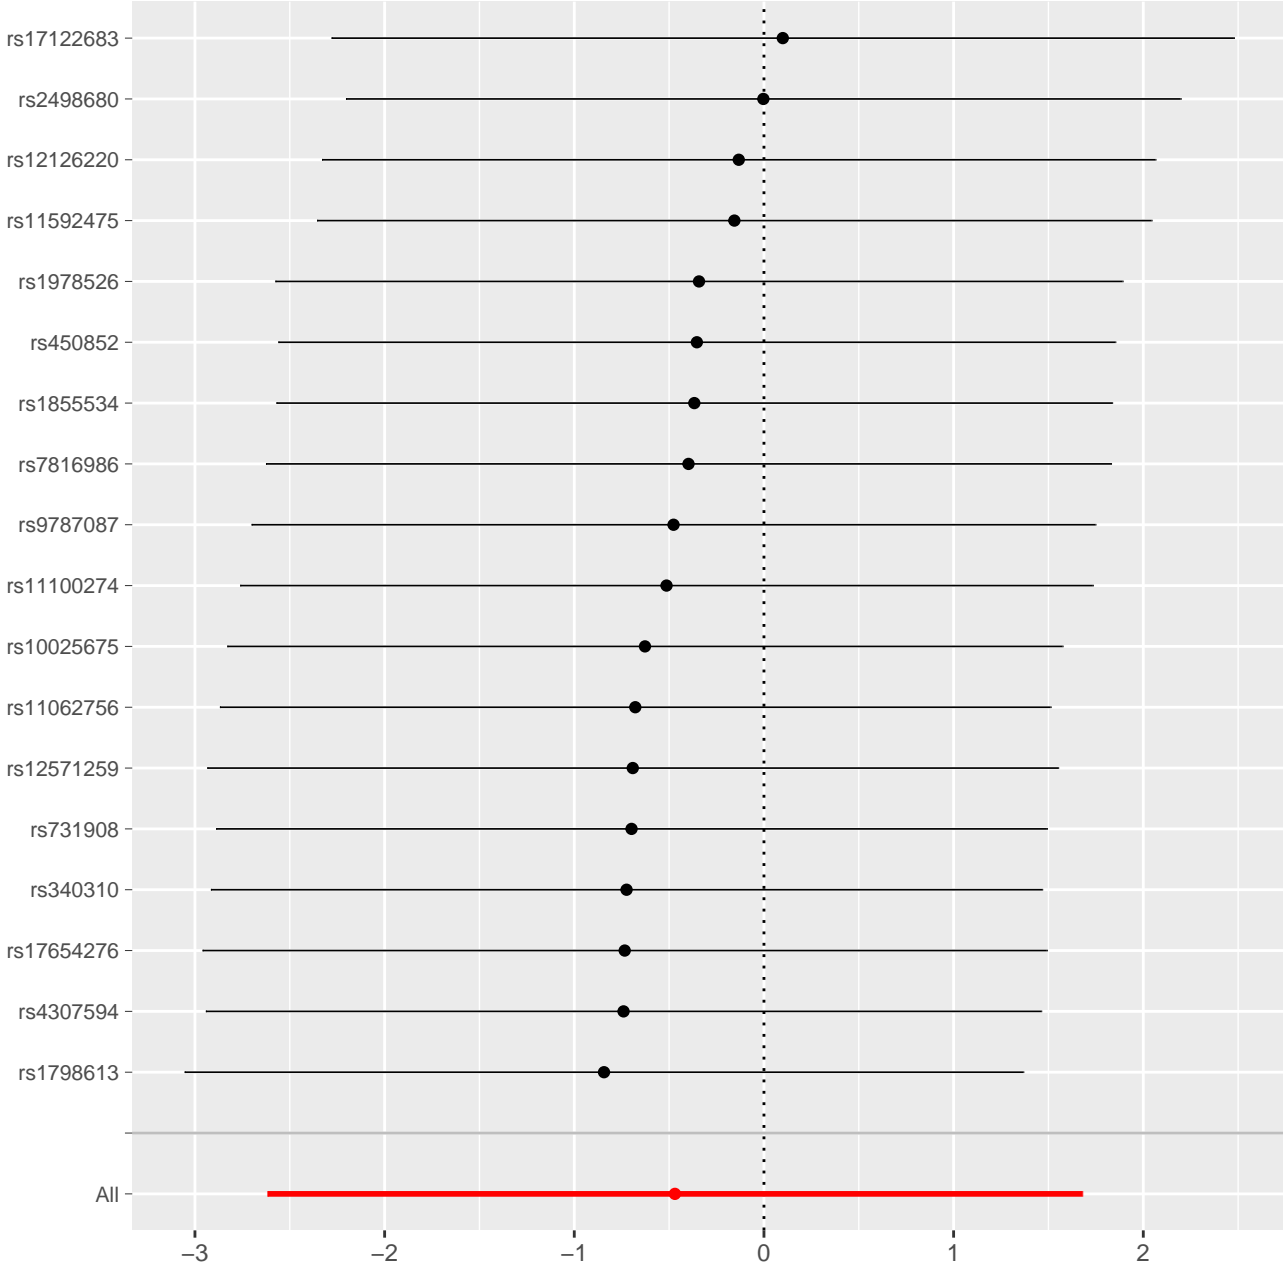

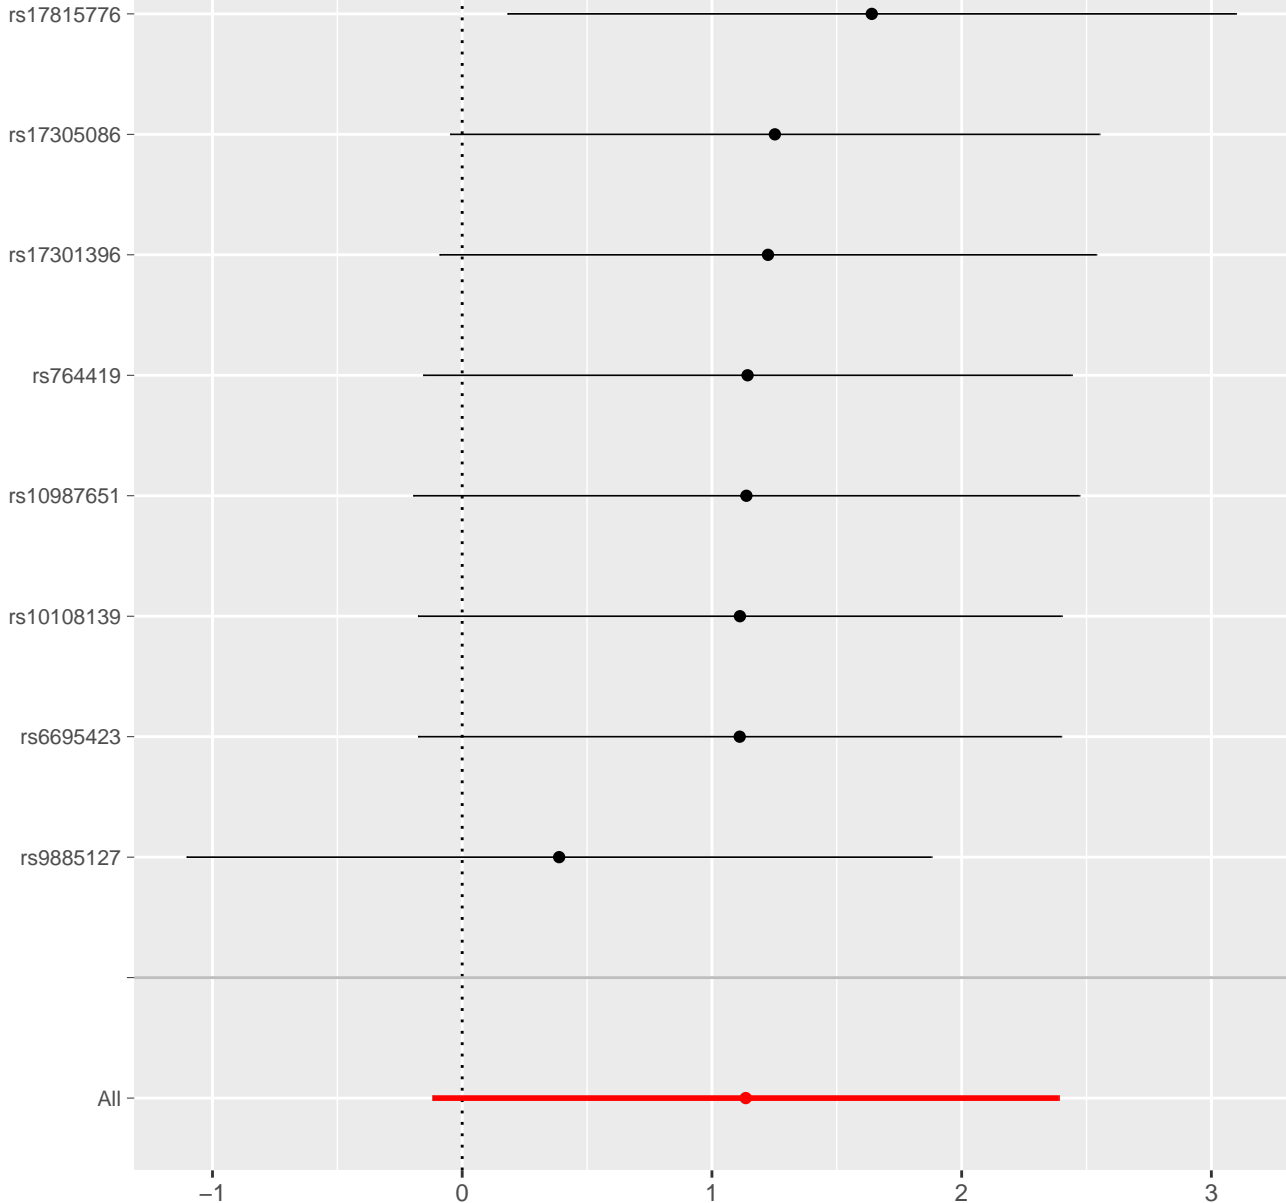

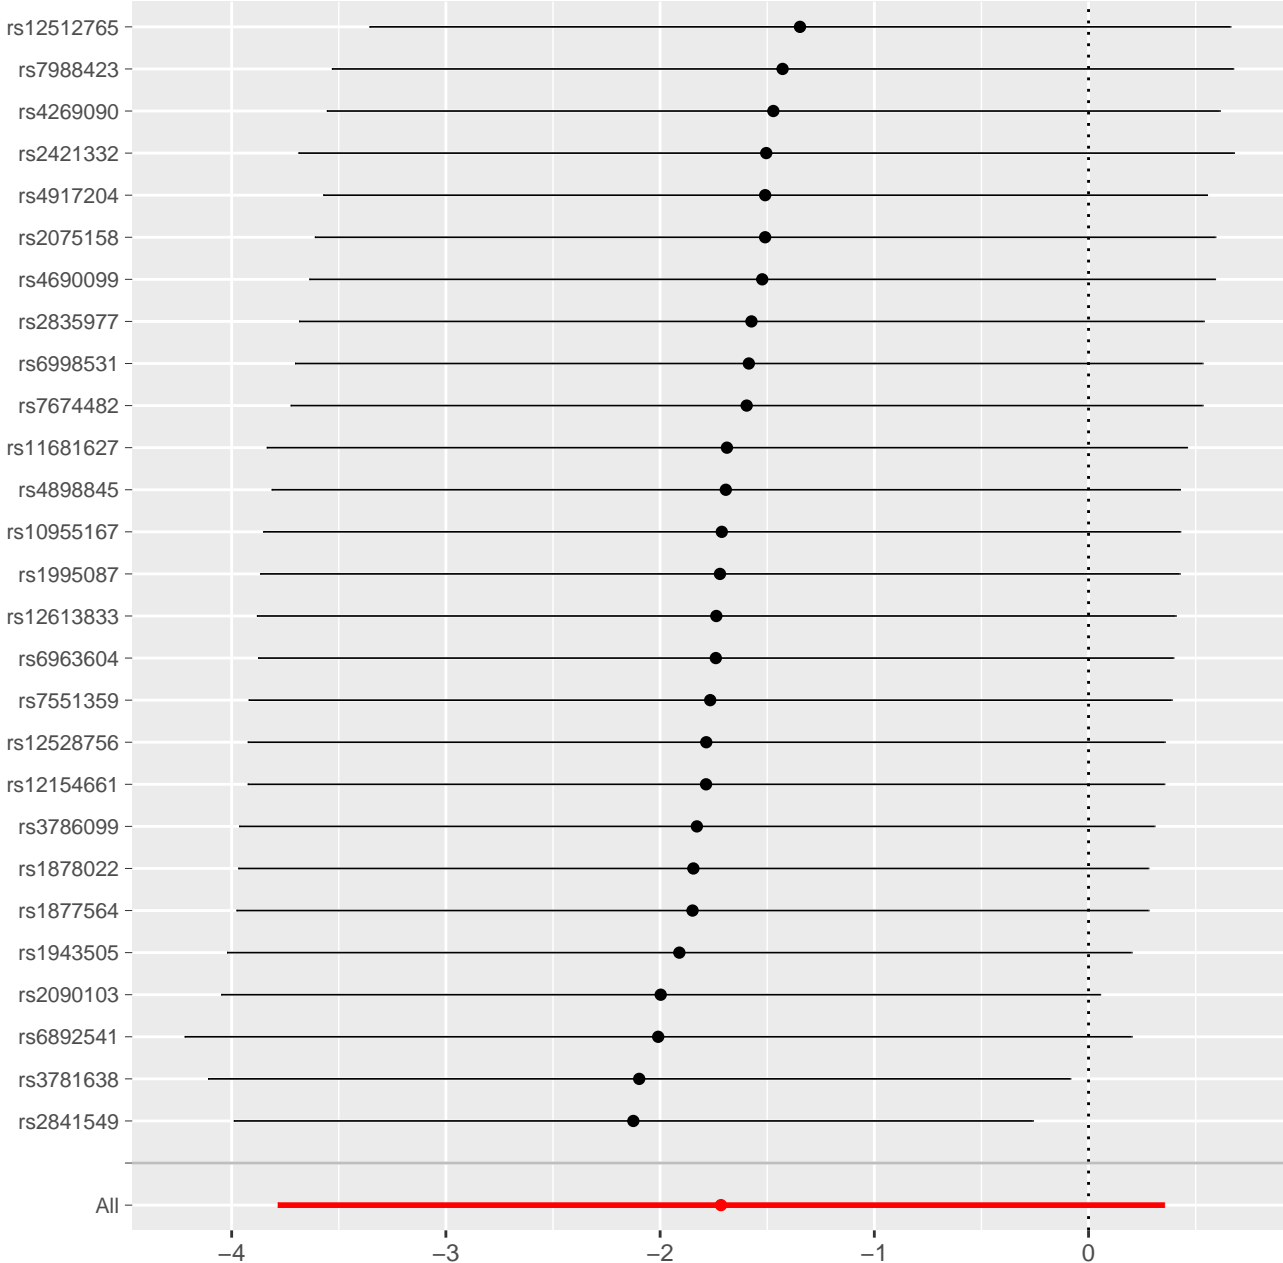

MR leave-one-out sensitivity analysis for 'M35397.metal.pos.txt.gz' on 'JUVEN\_ARTHR.gz'

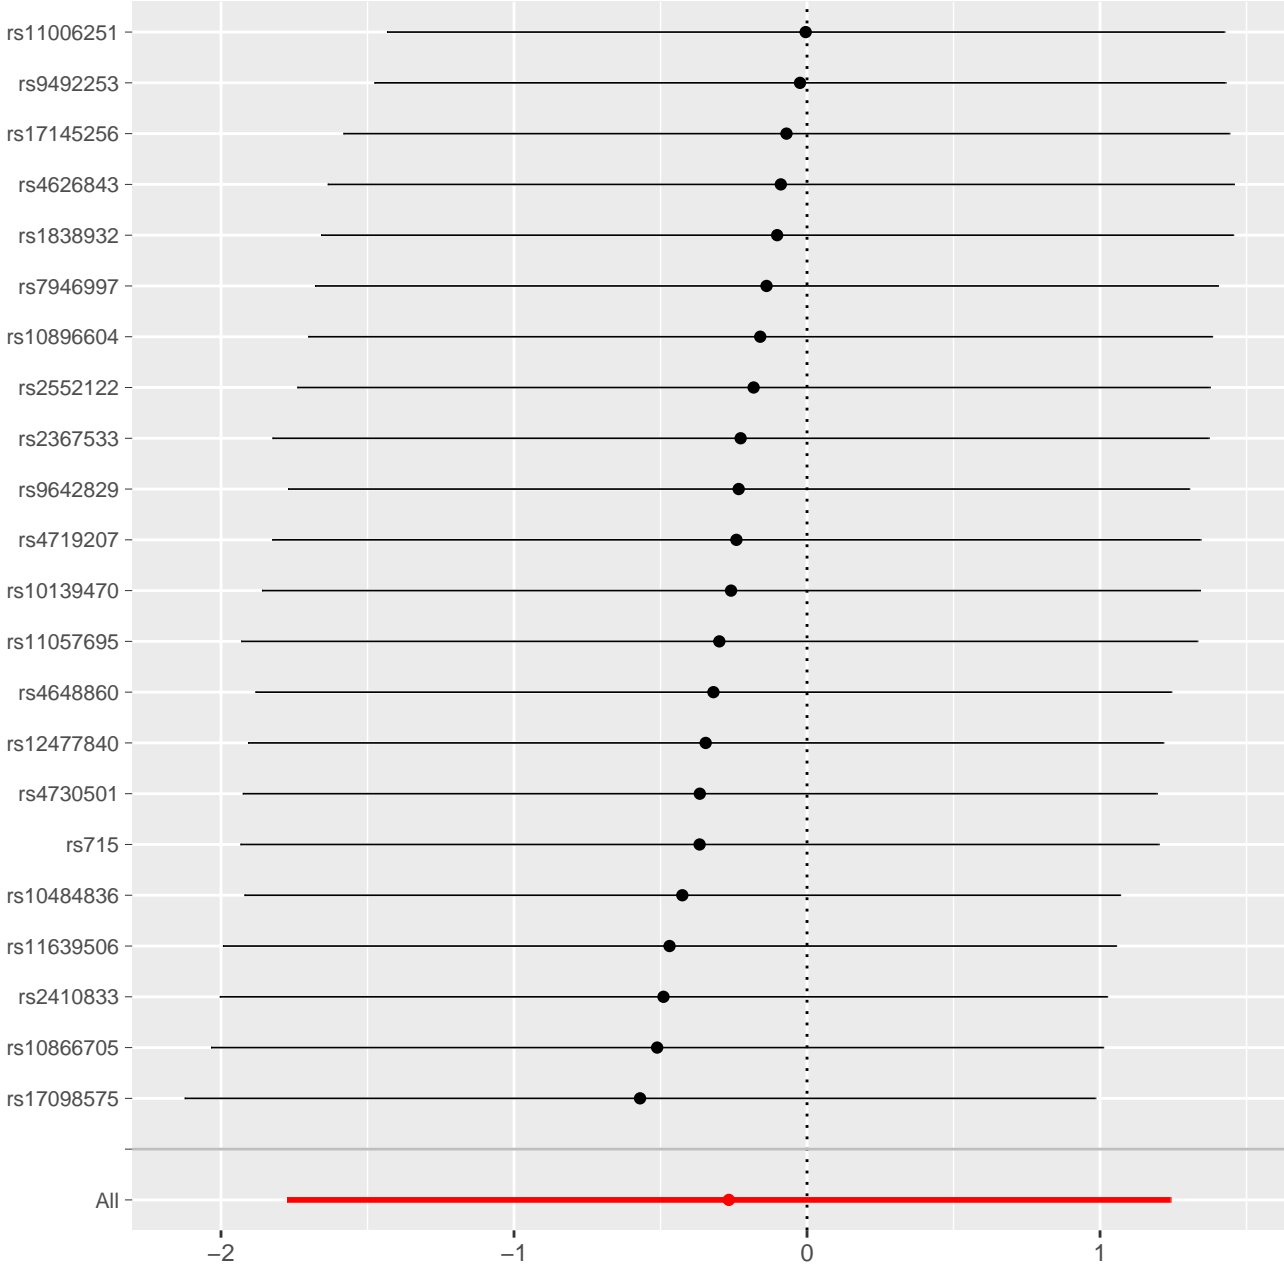

MR leave-one-out sensitivity analysis for 'M35431.metal.pos.txt.gz' on 'JUVEN\_ARTHR.gz'



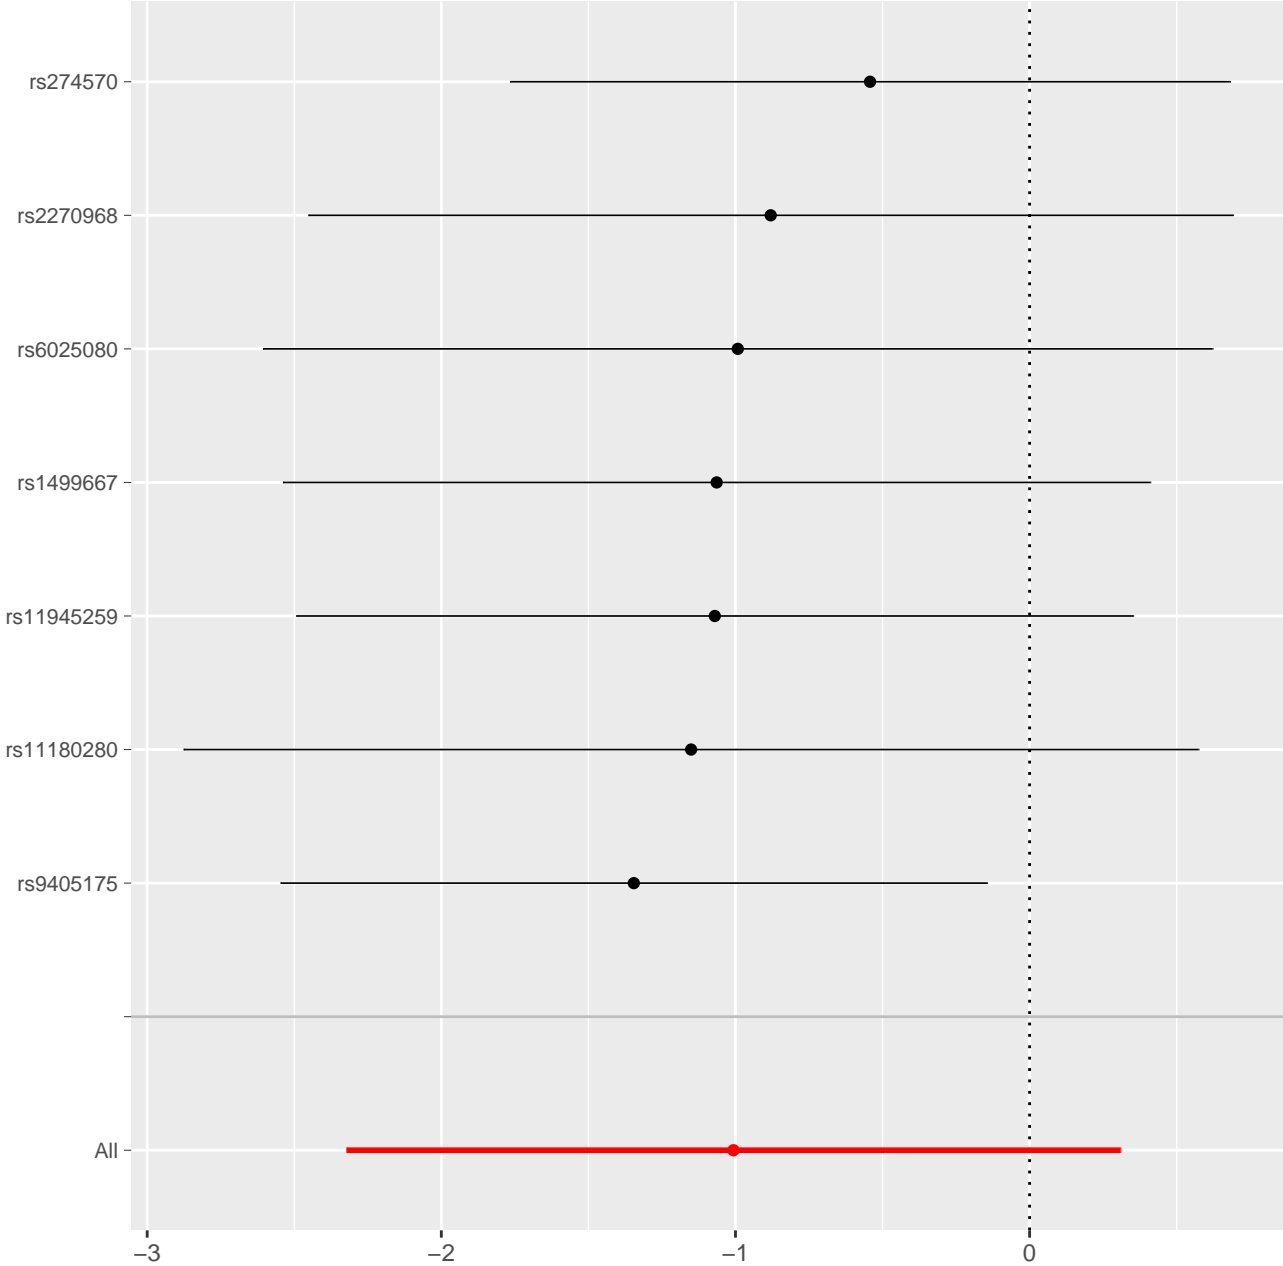

MR leave-one-out sensitivity analysis for 'M35433.metal.pos.txt.gz' on 'JUVEN\_ARTHR.gz'

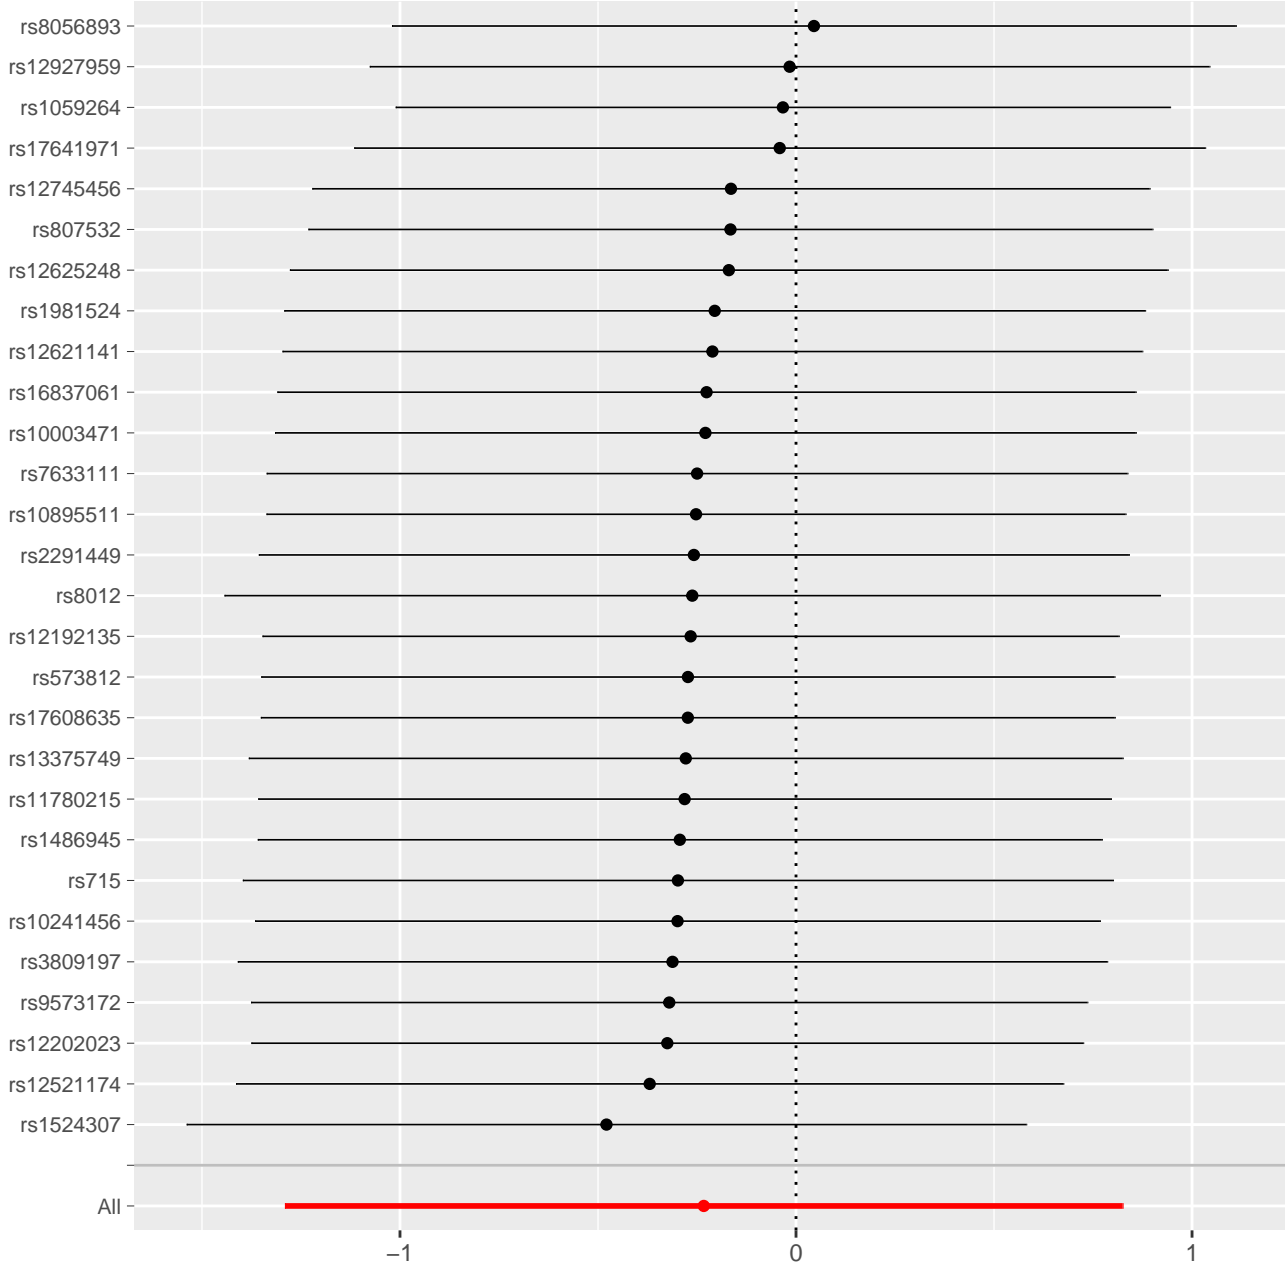

MR leave-one-out sensitivity analysis for 'M35439.metal.pos.txt.gz' on 'JUVEN\_ARTHR.gz'

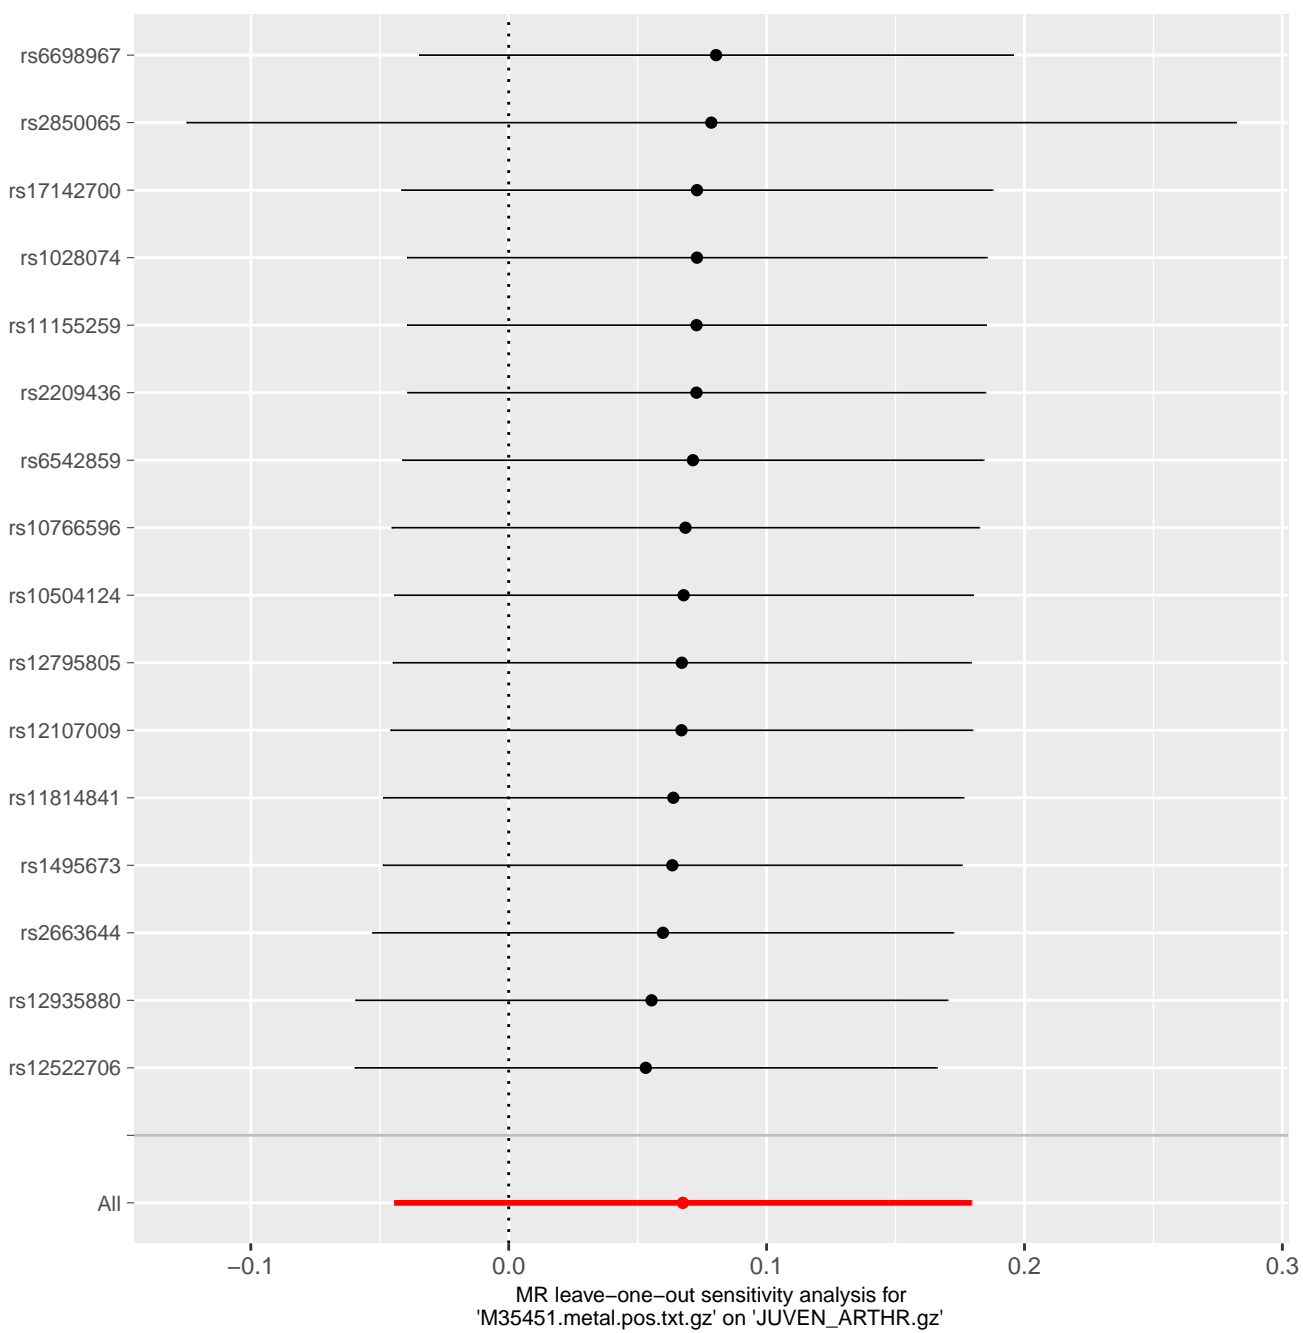

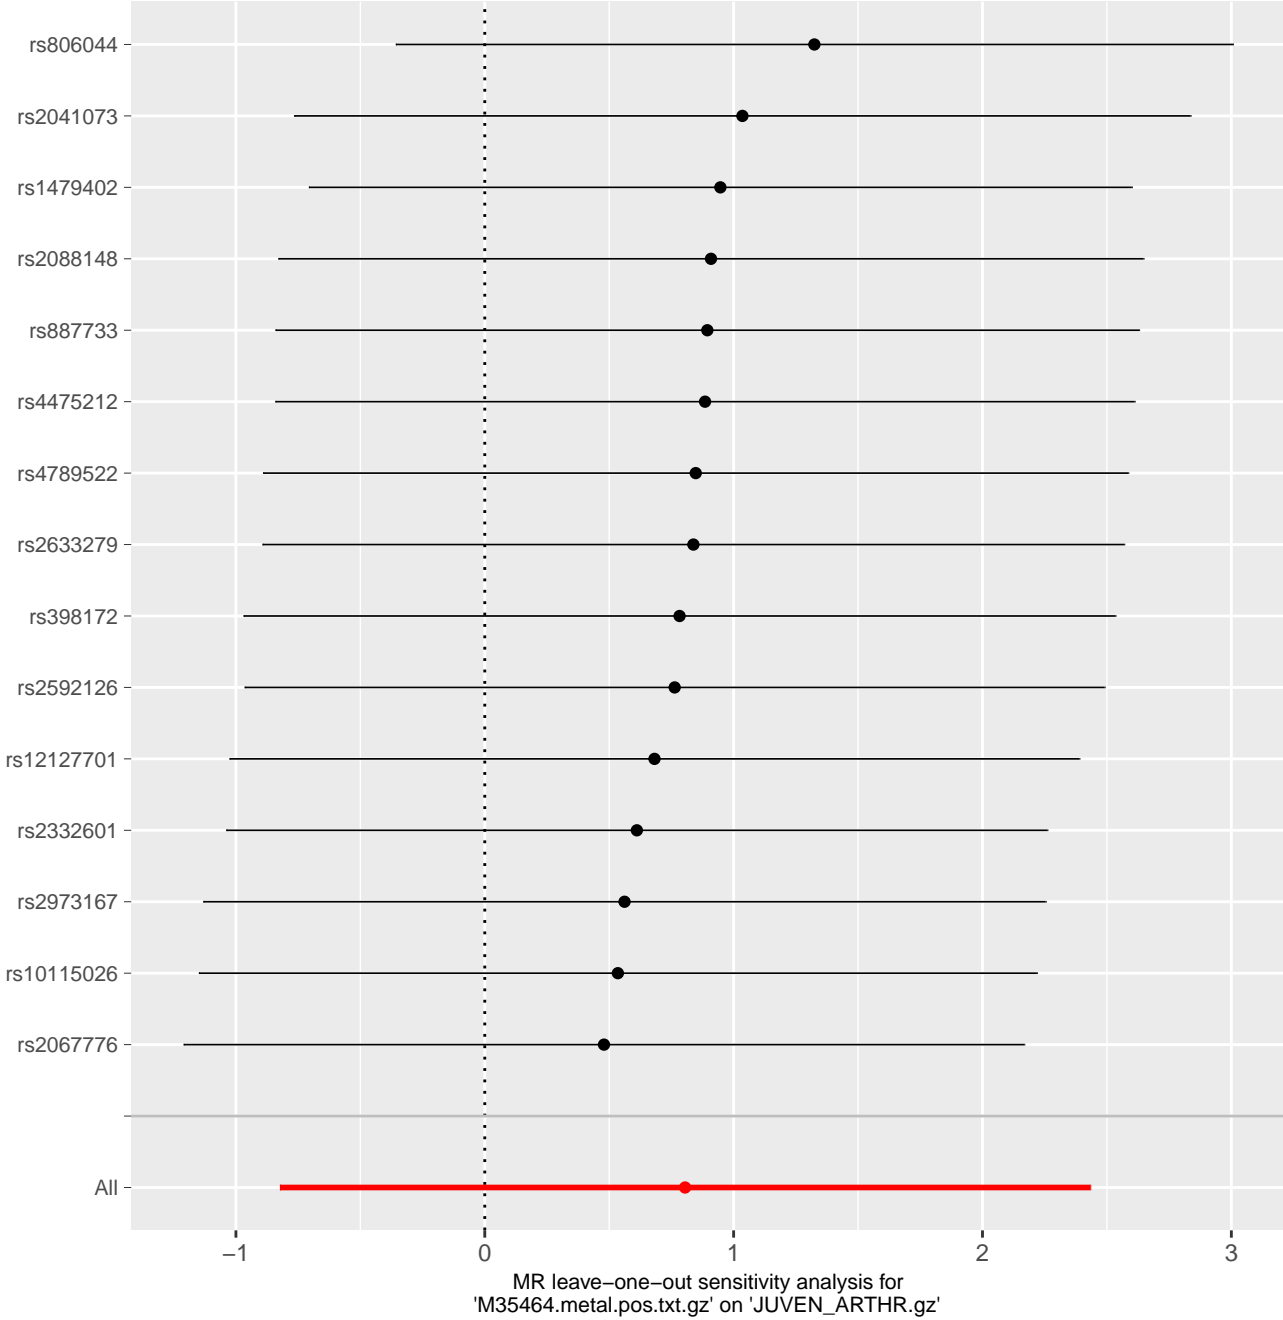

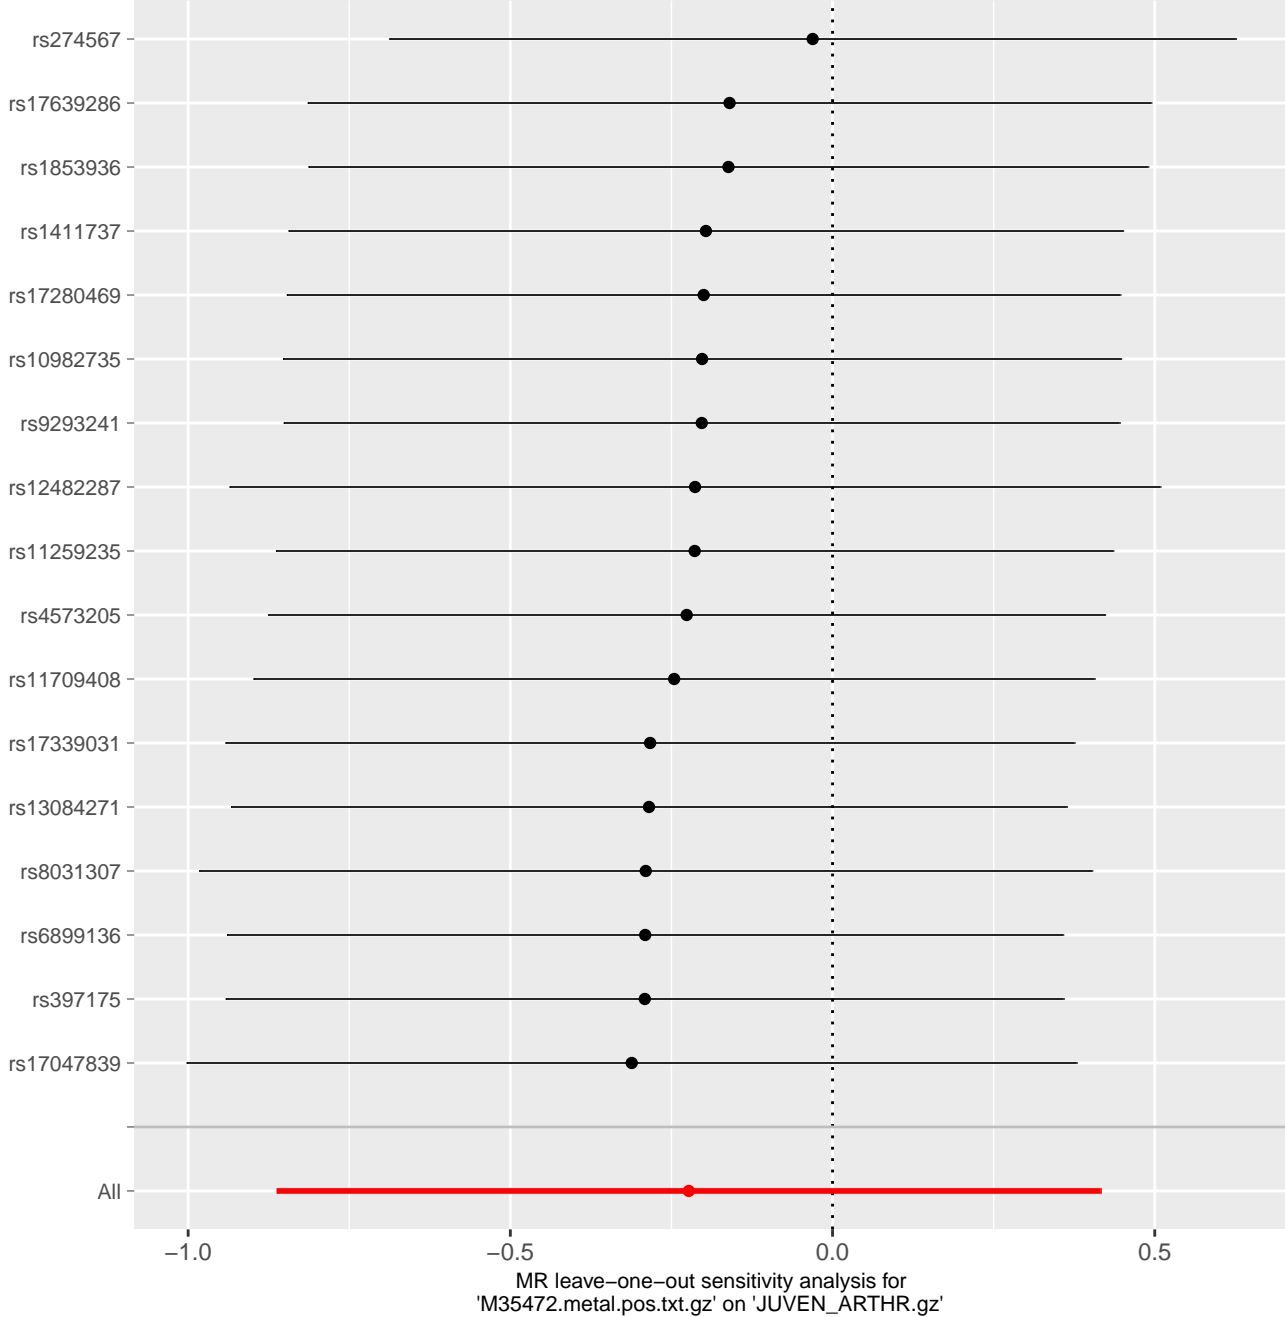

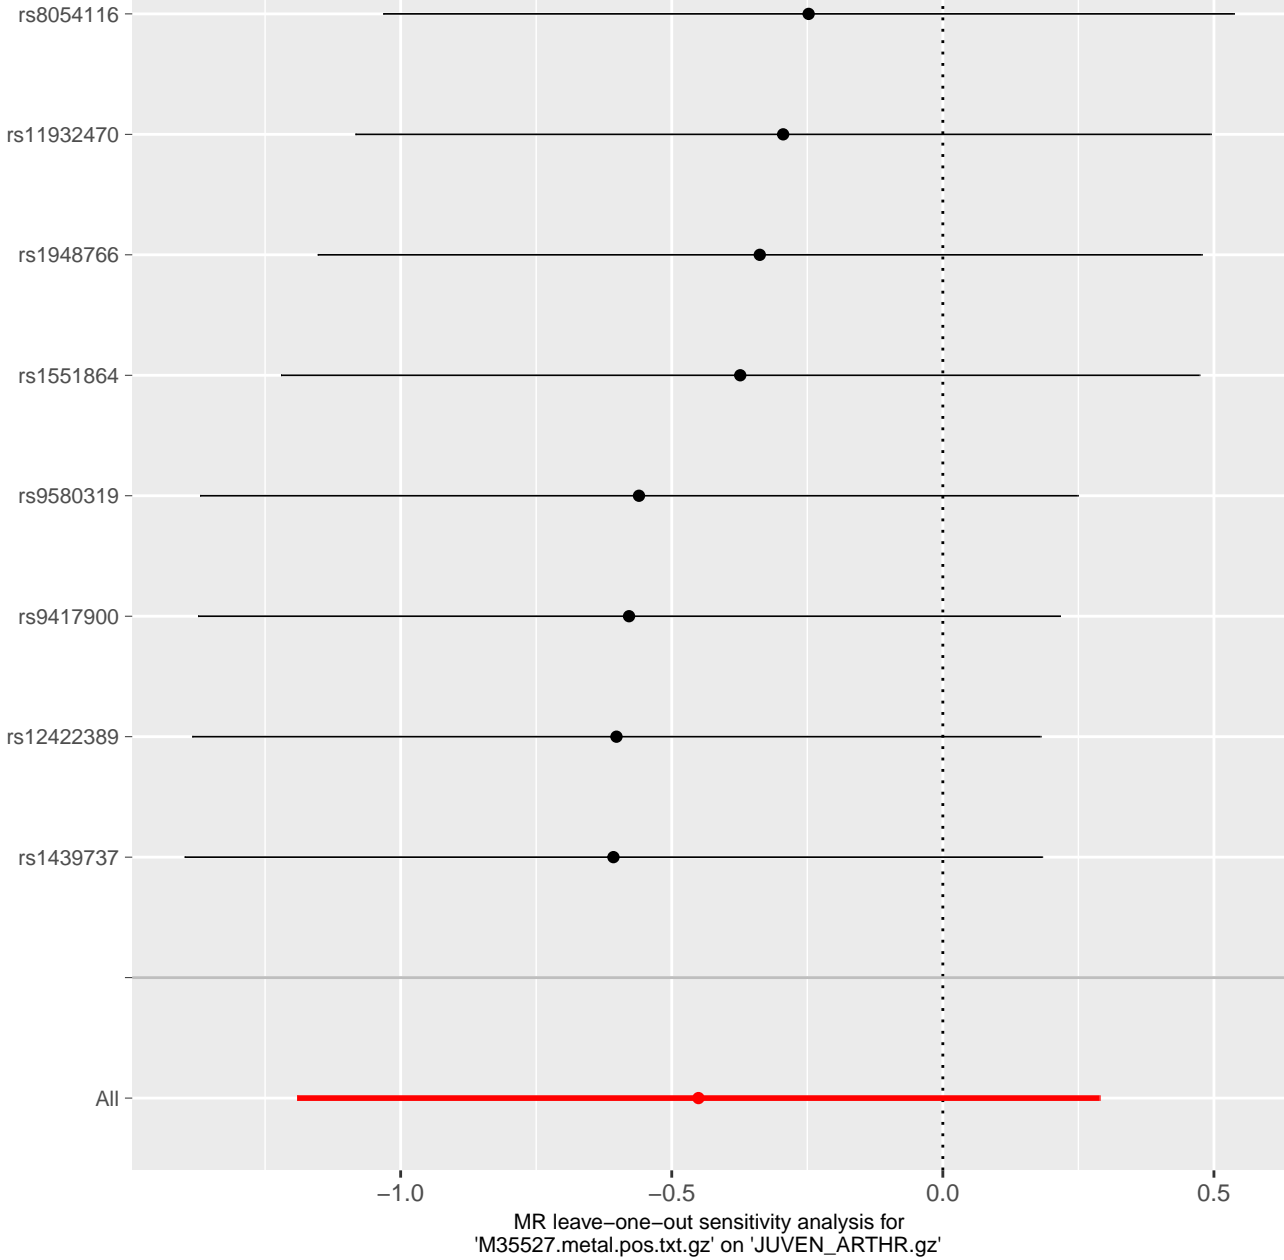

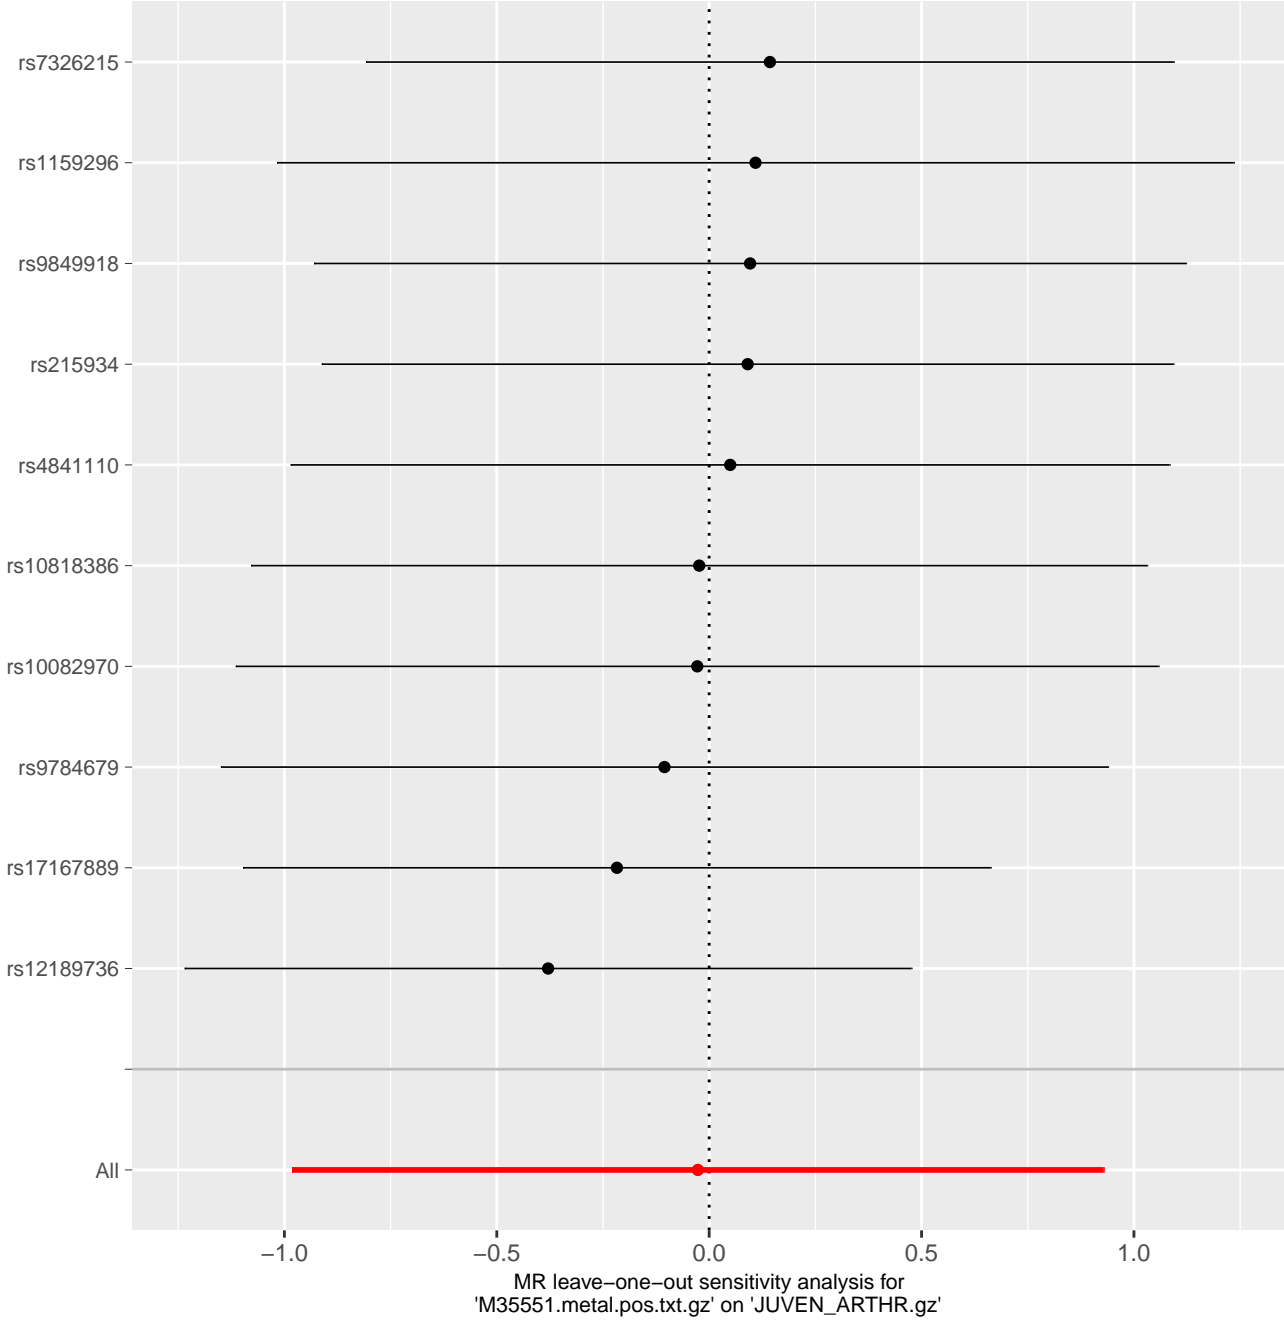

rs3813782

rs1493534

rs2490288

rs7710231

rs780093

rs249619

All

-1

0

1

2

3

MR leave-one-out sensitivity analysis for  
'M35626.metal.pos.txt.gz' on 'JUVEN\_ARTHR.gz'

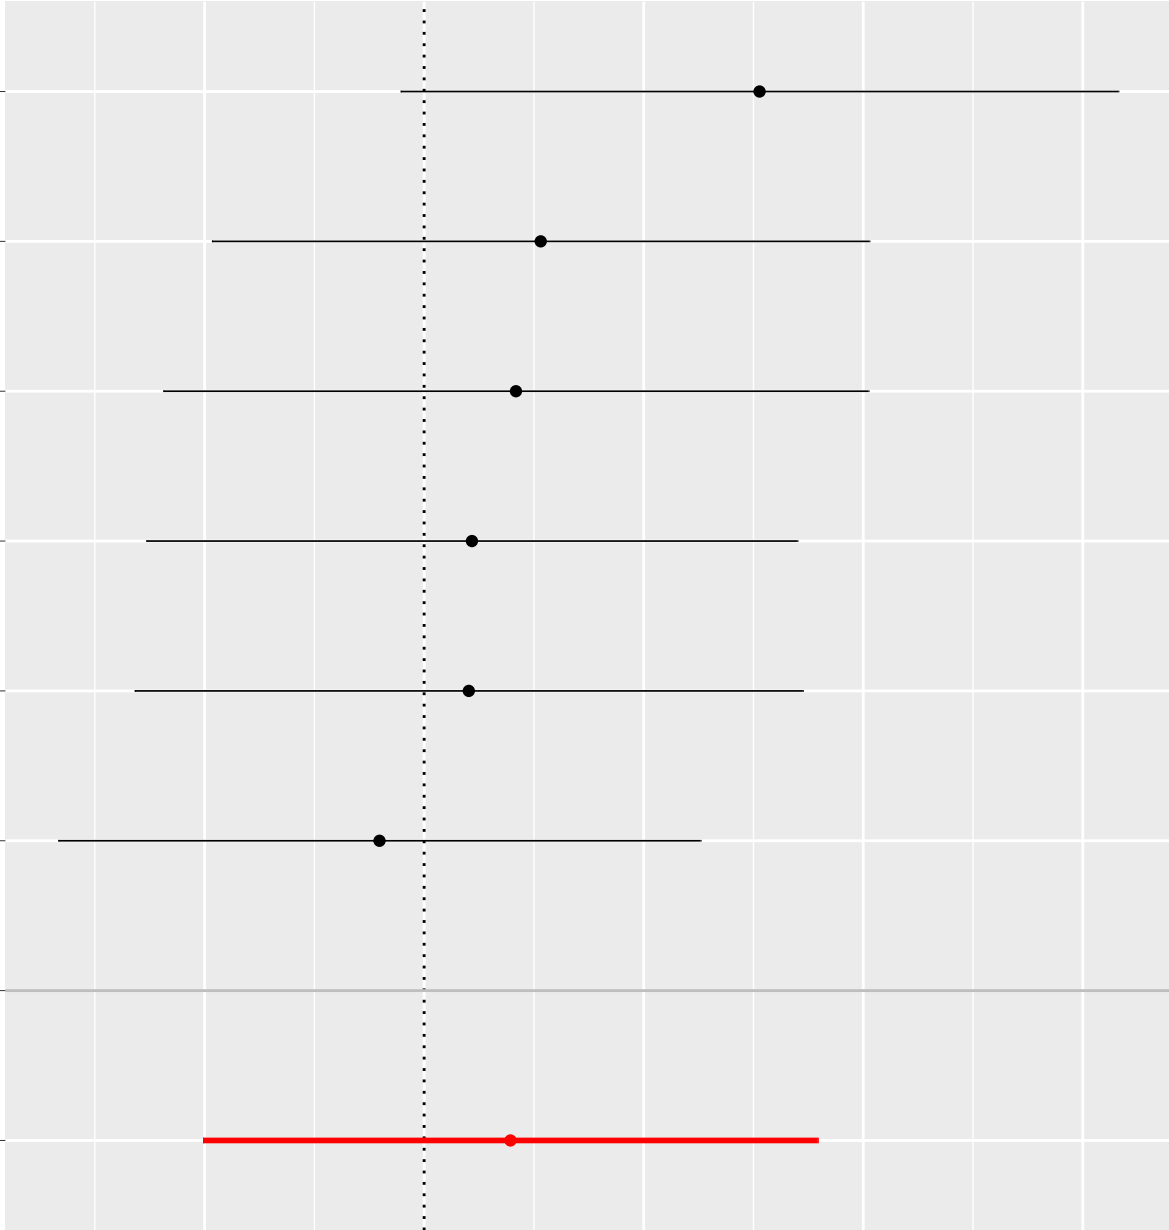



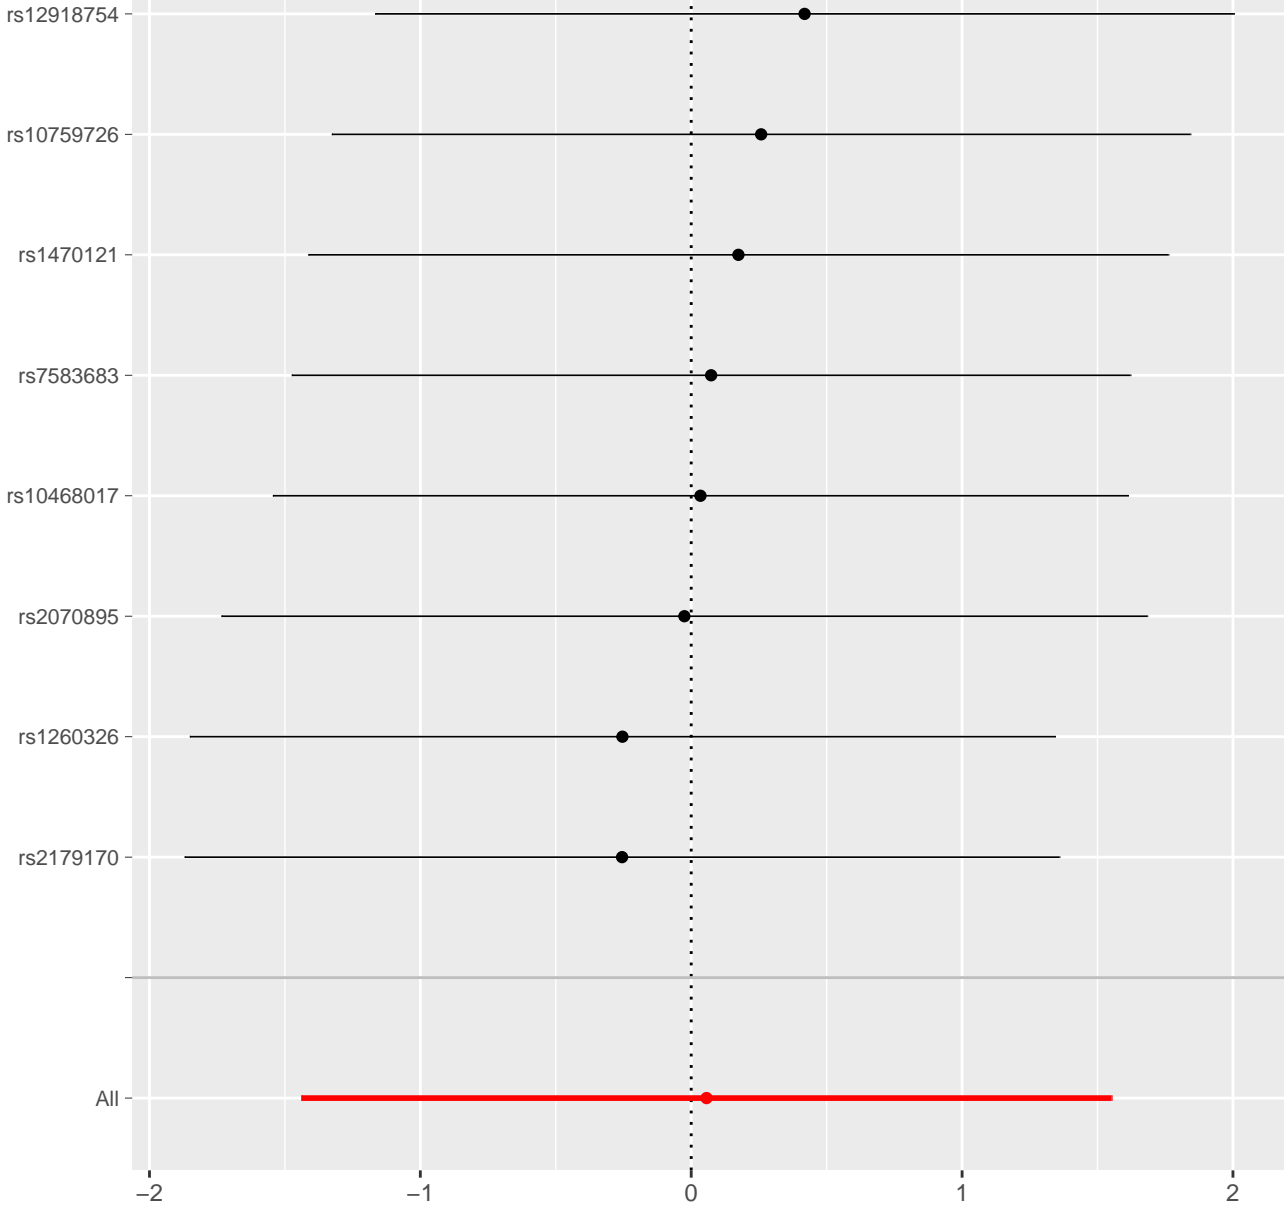

MR leave-one-out sensitivity analysis for 'M35628.metal.pos.txt.gz' on 'JUVEN\_ARTHR.gz'

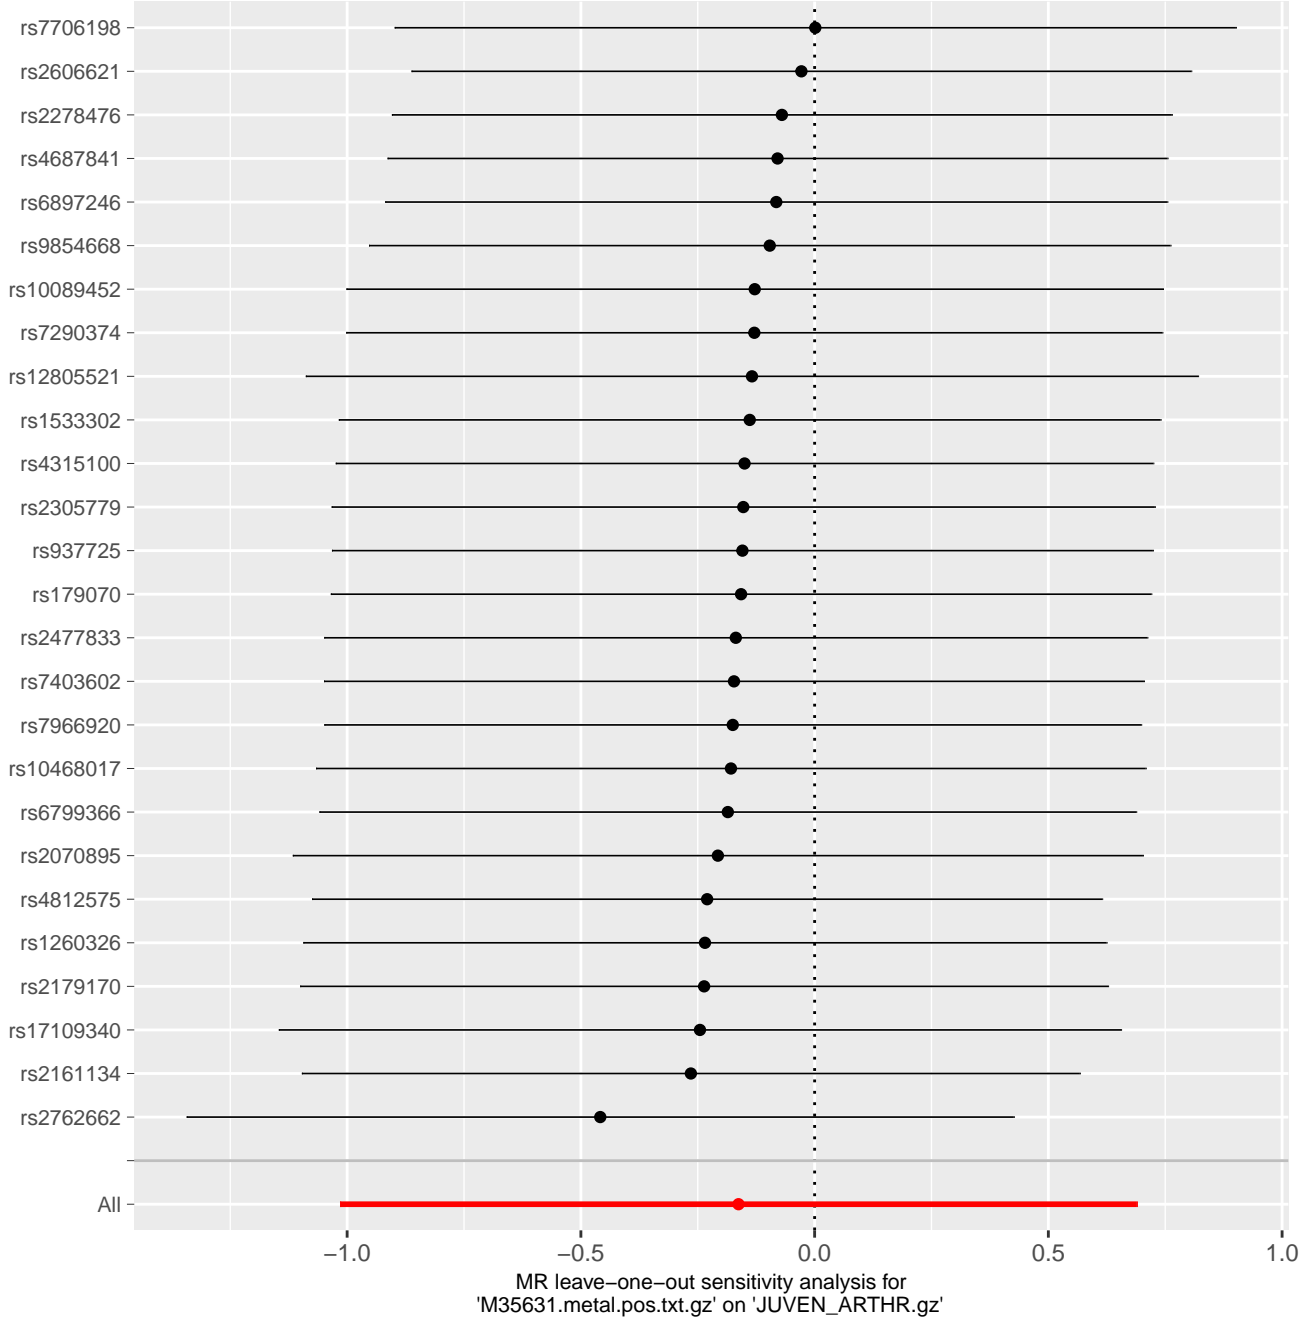

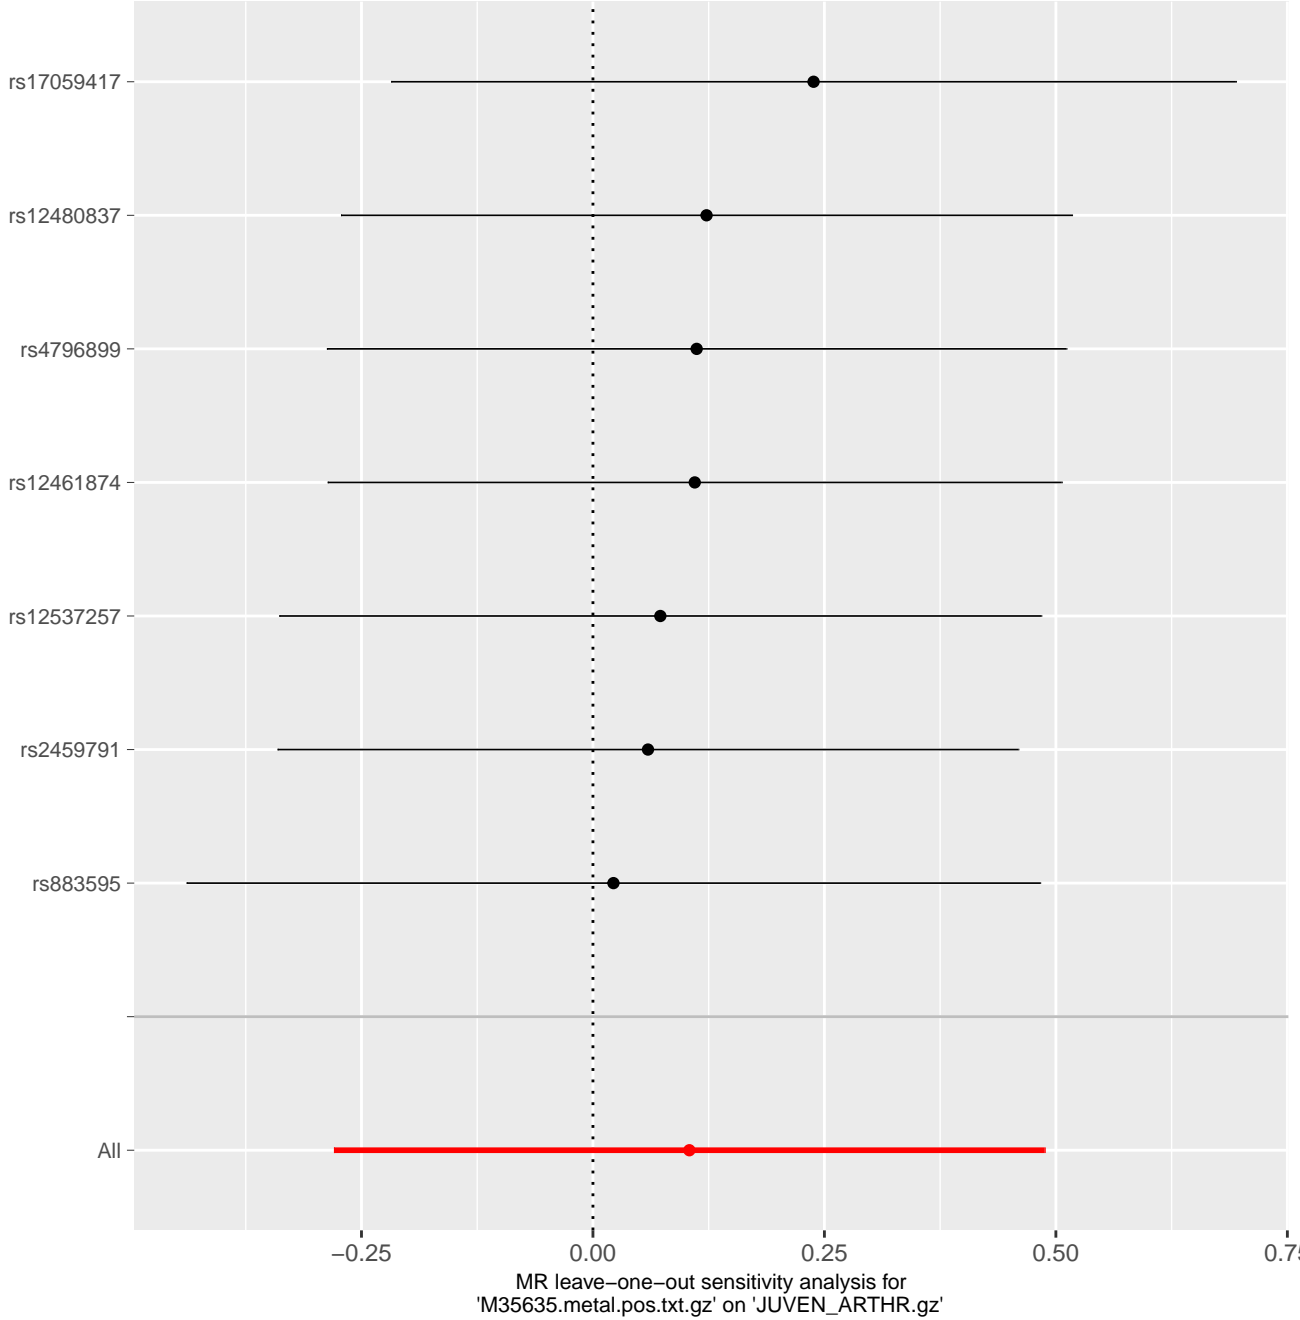

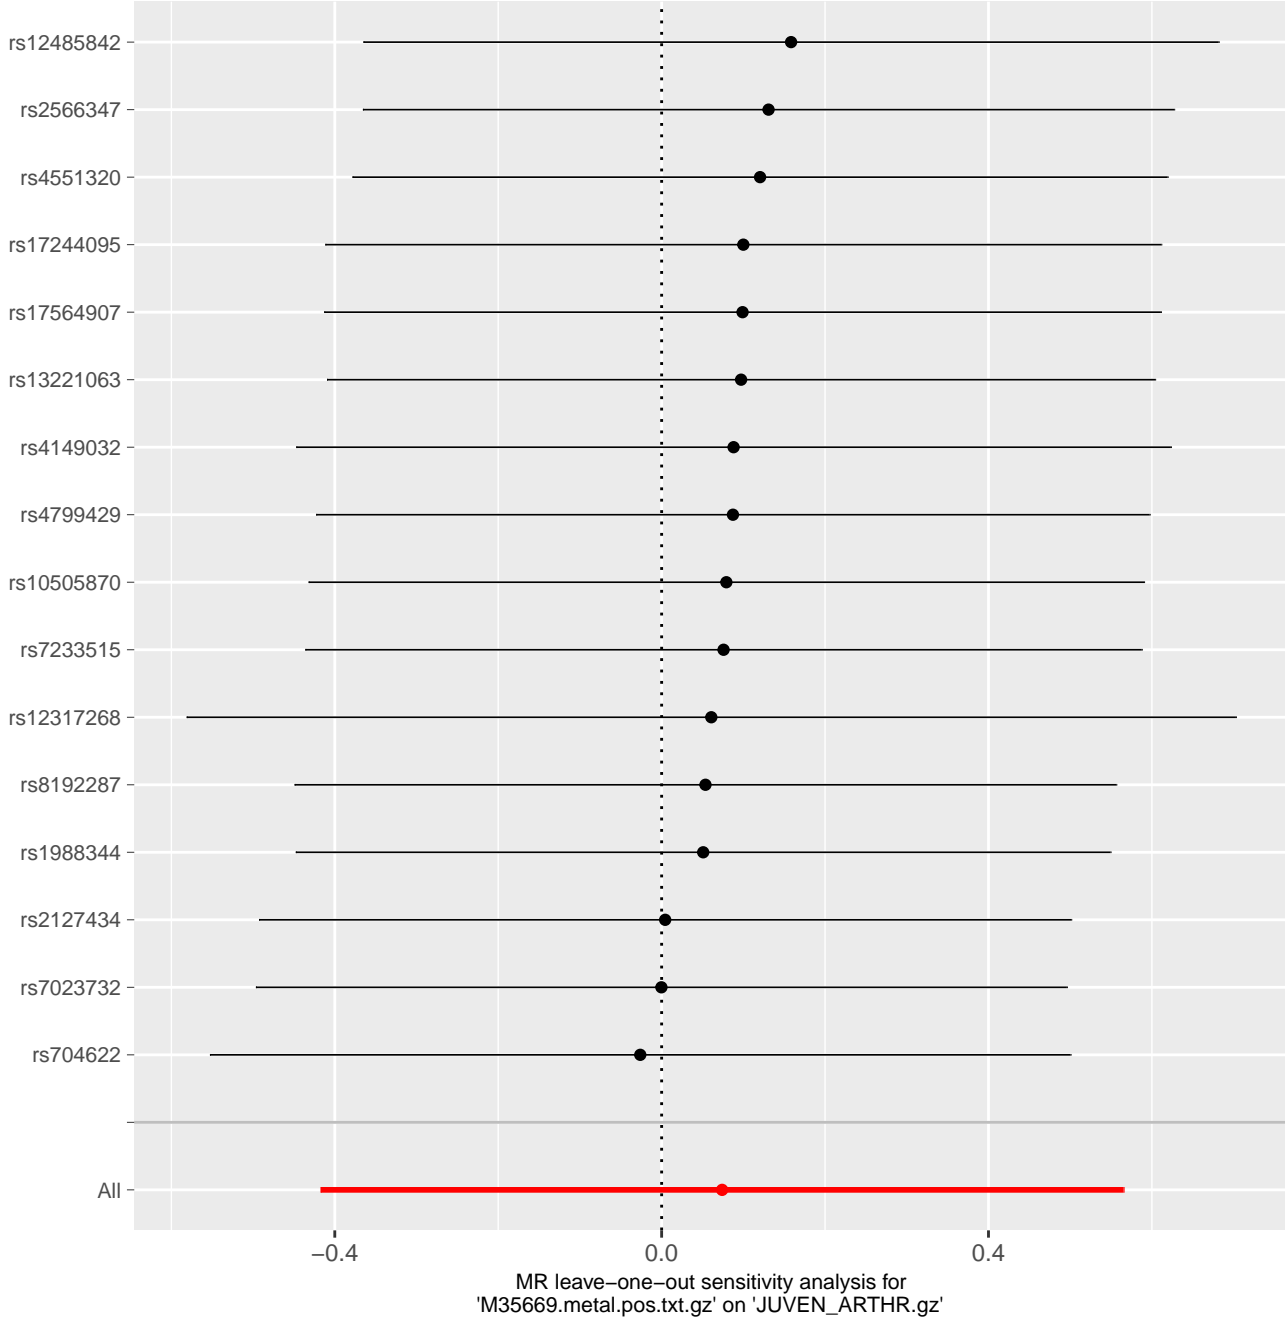

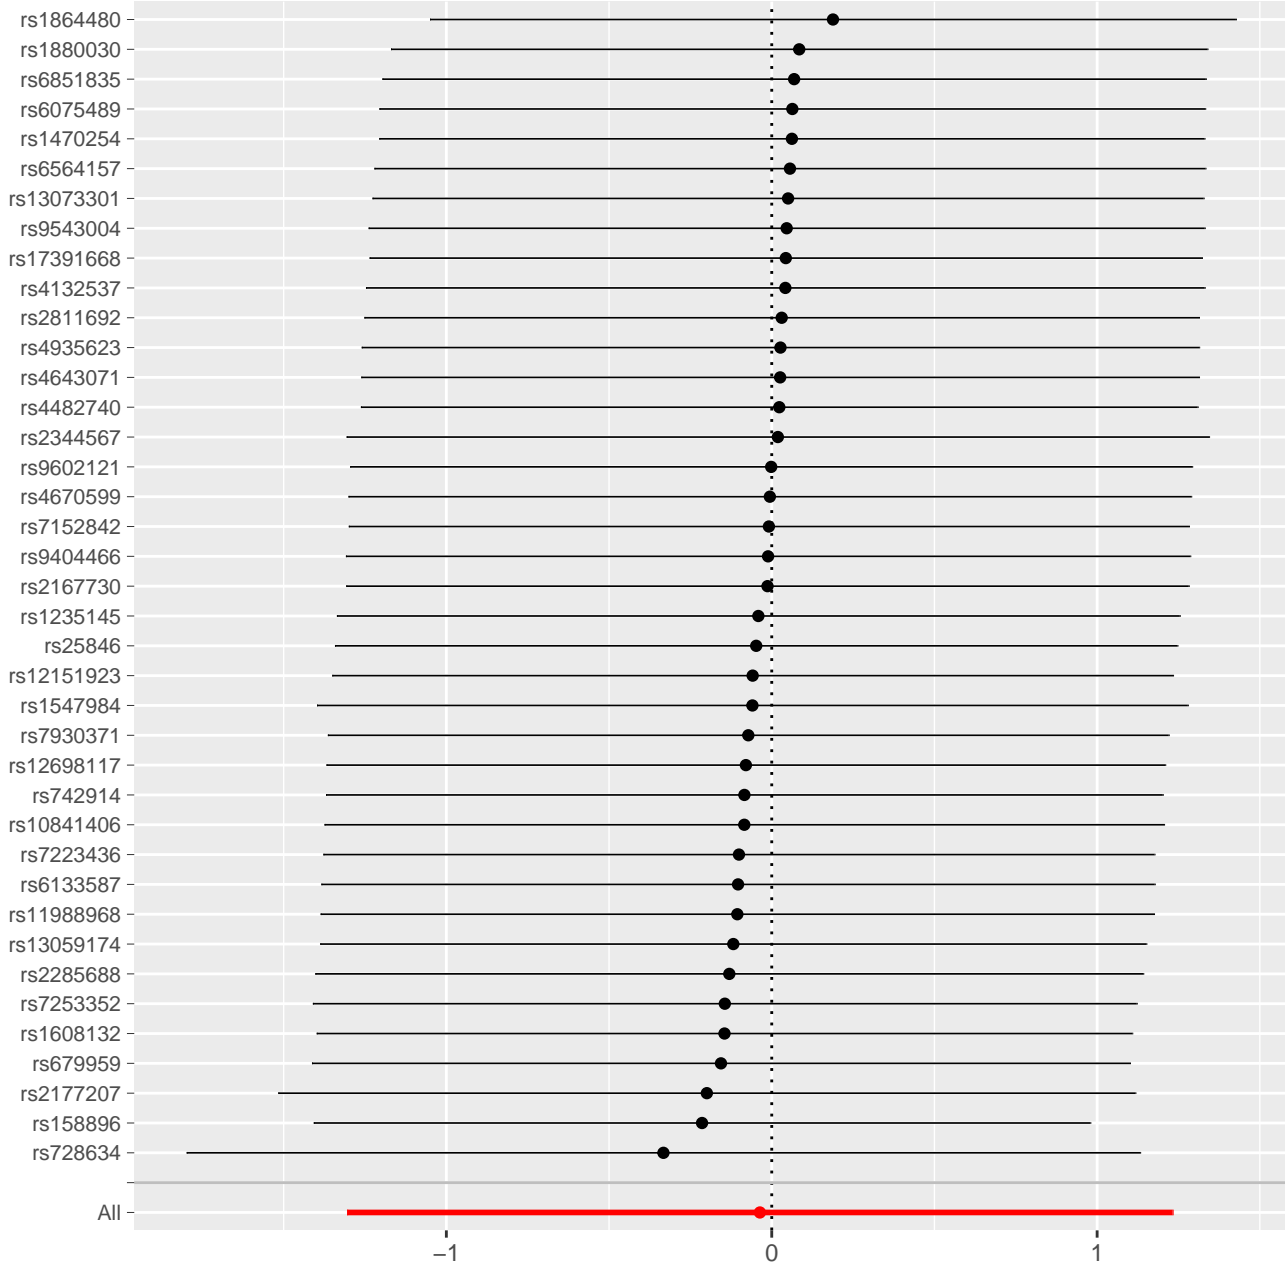

MR leave-one-out sensitivity analysis for 'M35675.metal.pos.txt.gz' on 'JUVEN\_ARTHR.gz'

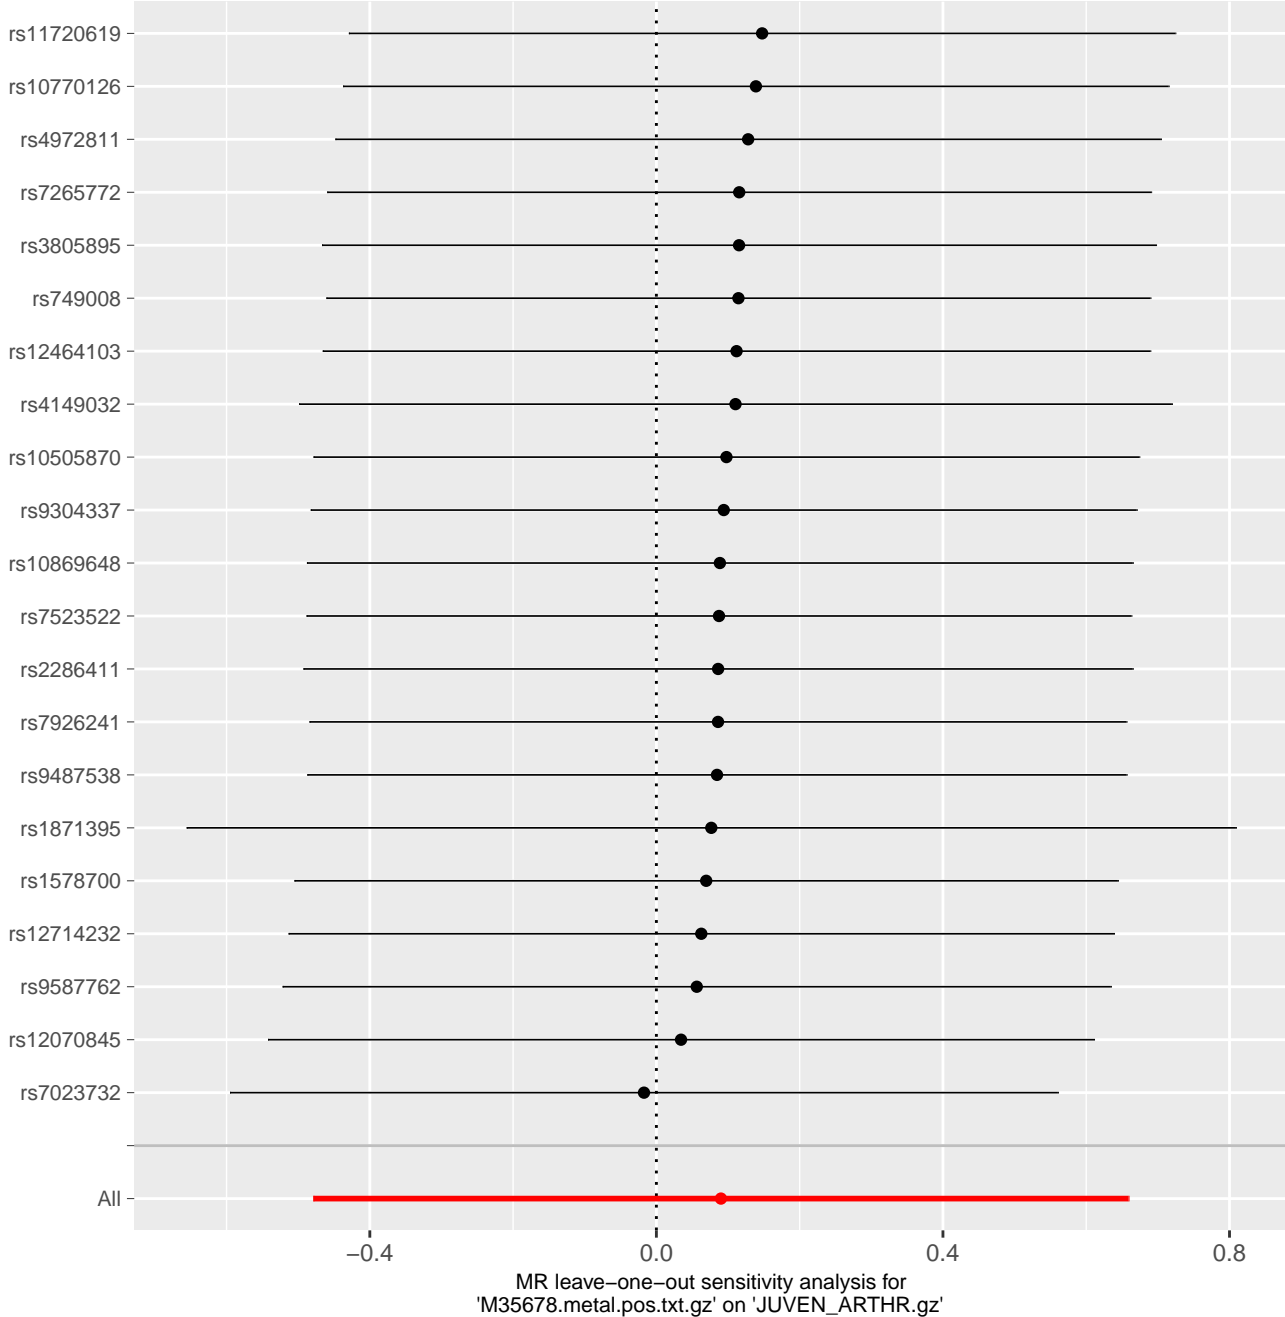

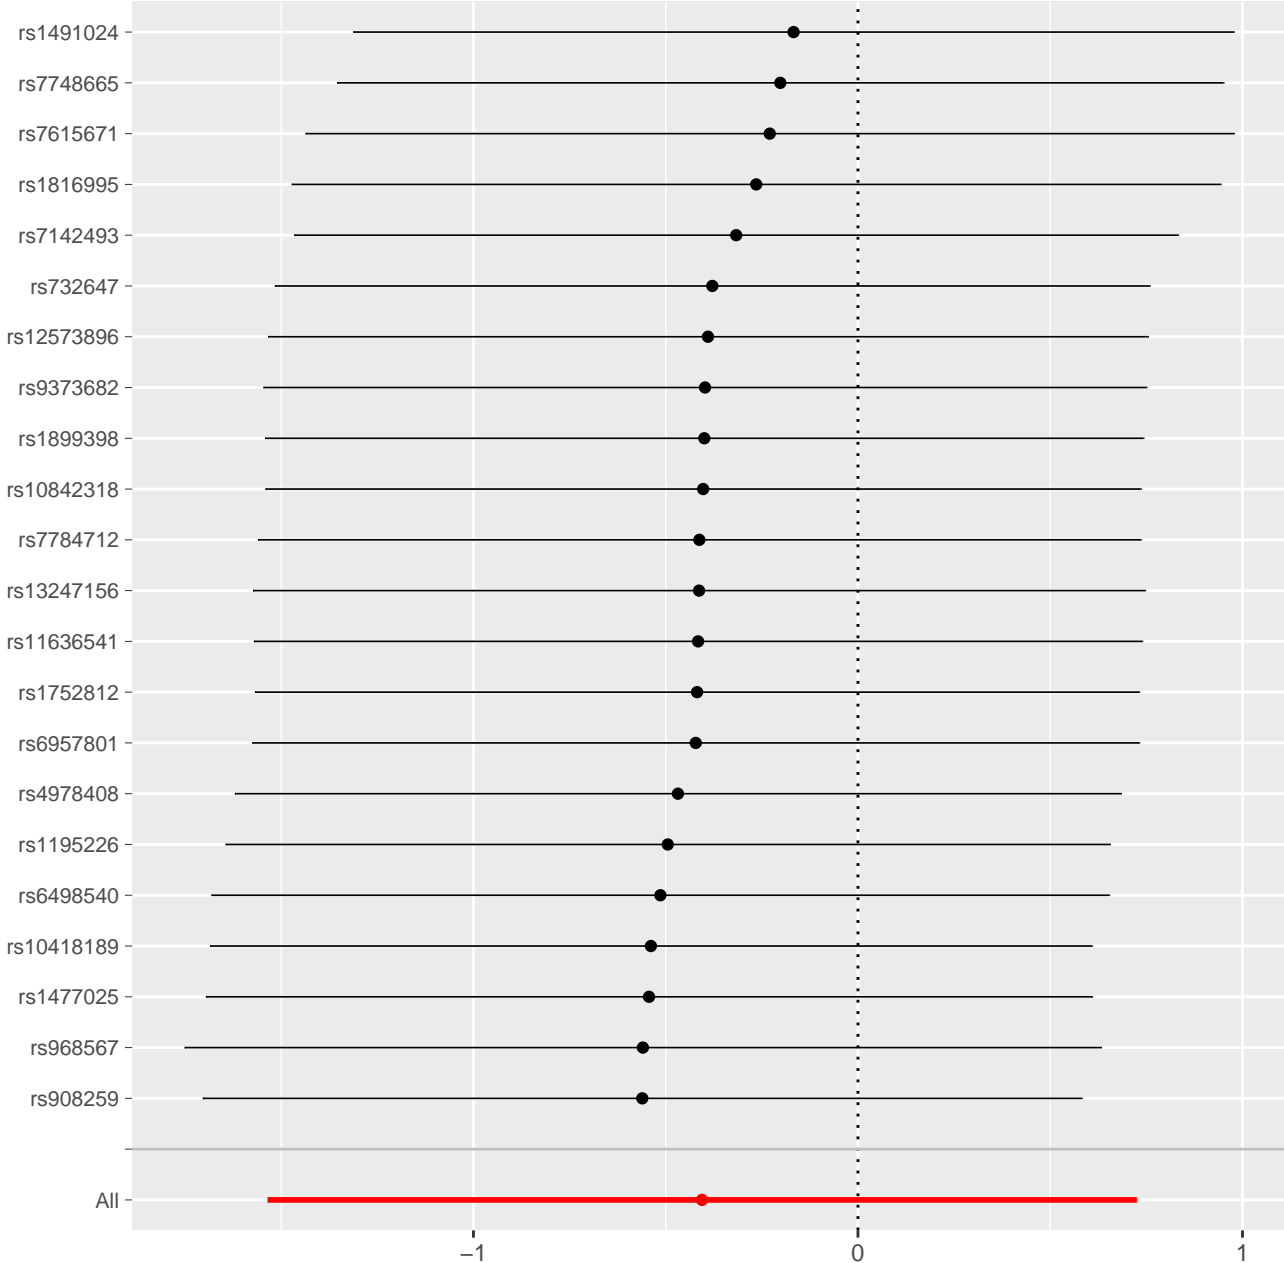

MR leave-one-out sensitivity analysis for 'M35718.metal.pos.txt.gz' on 'JUVEN\_ARTHR.gz'

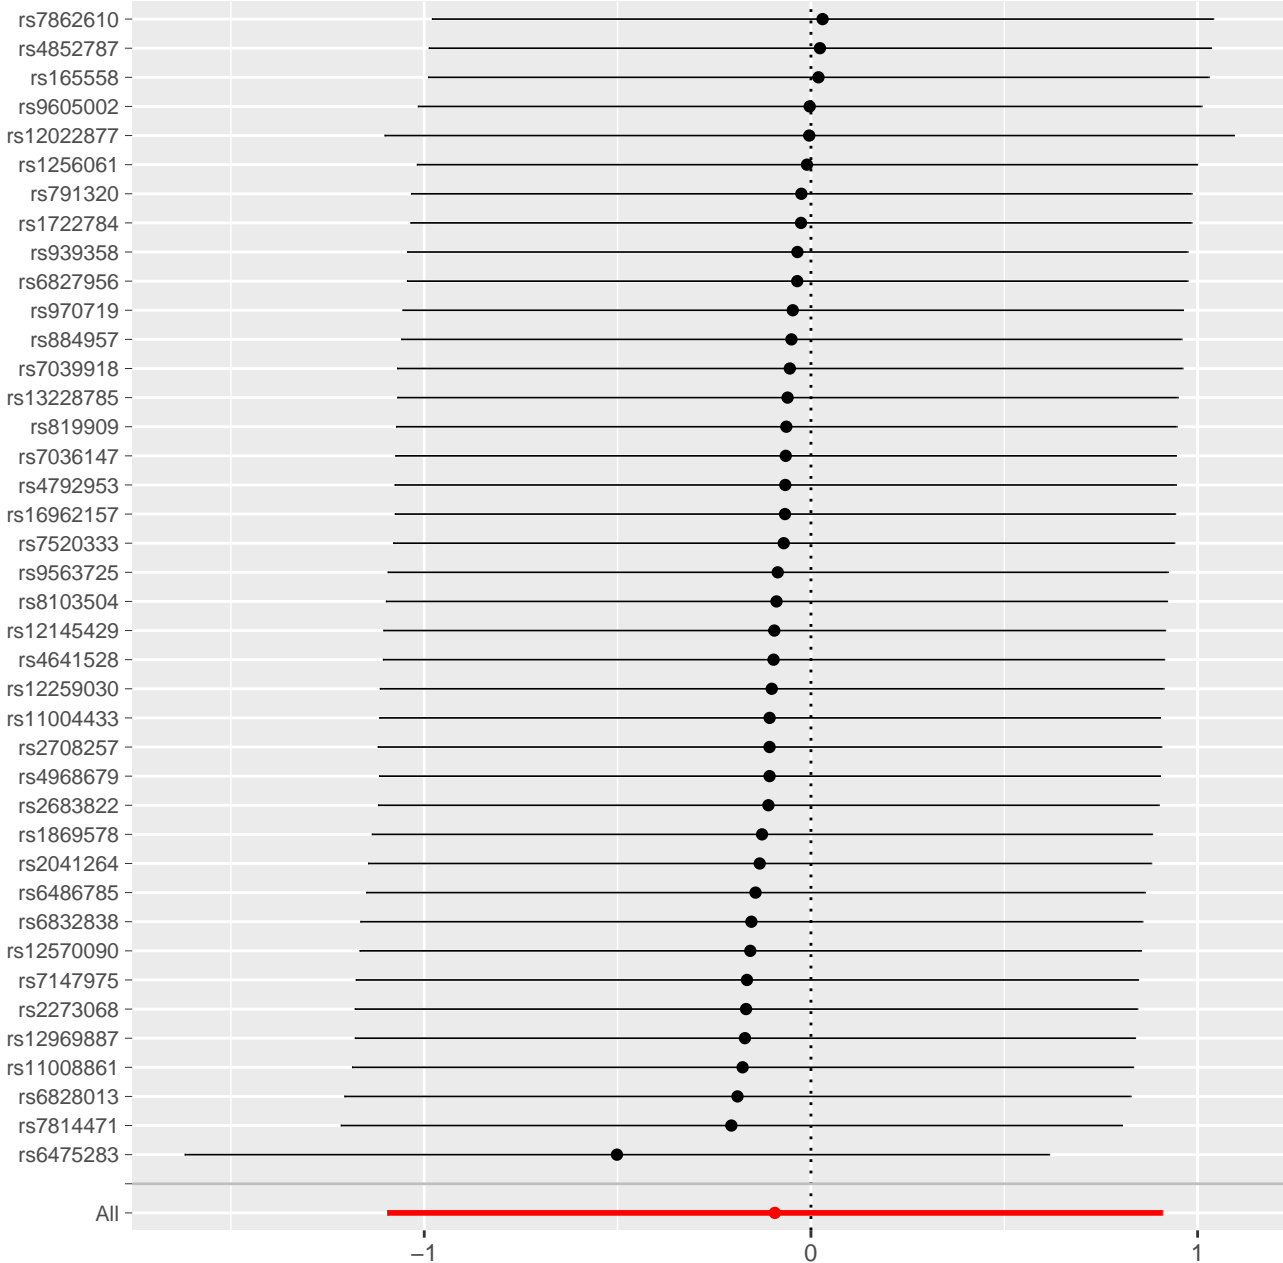

MR leave-one-out sensitivity analysis for 'M35754.metal.pos.txt.gz' on 'JUVEN\_ARTHR.gz'



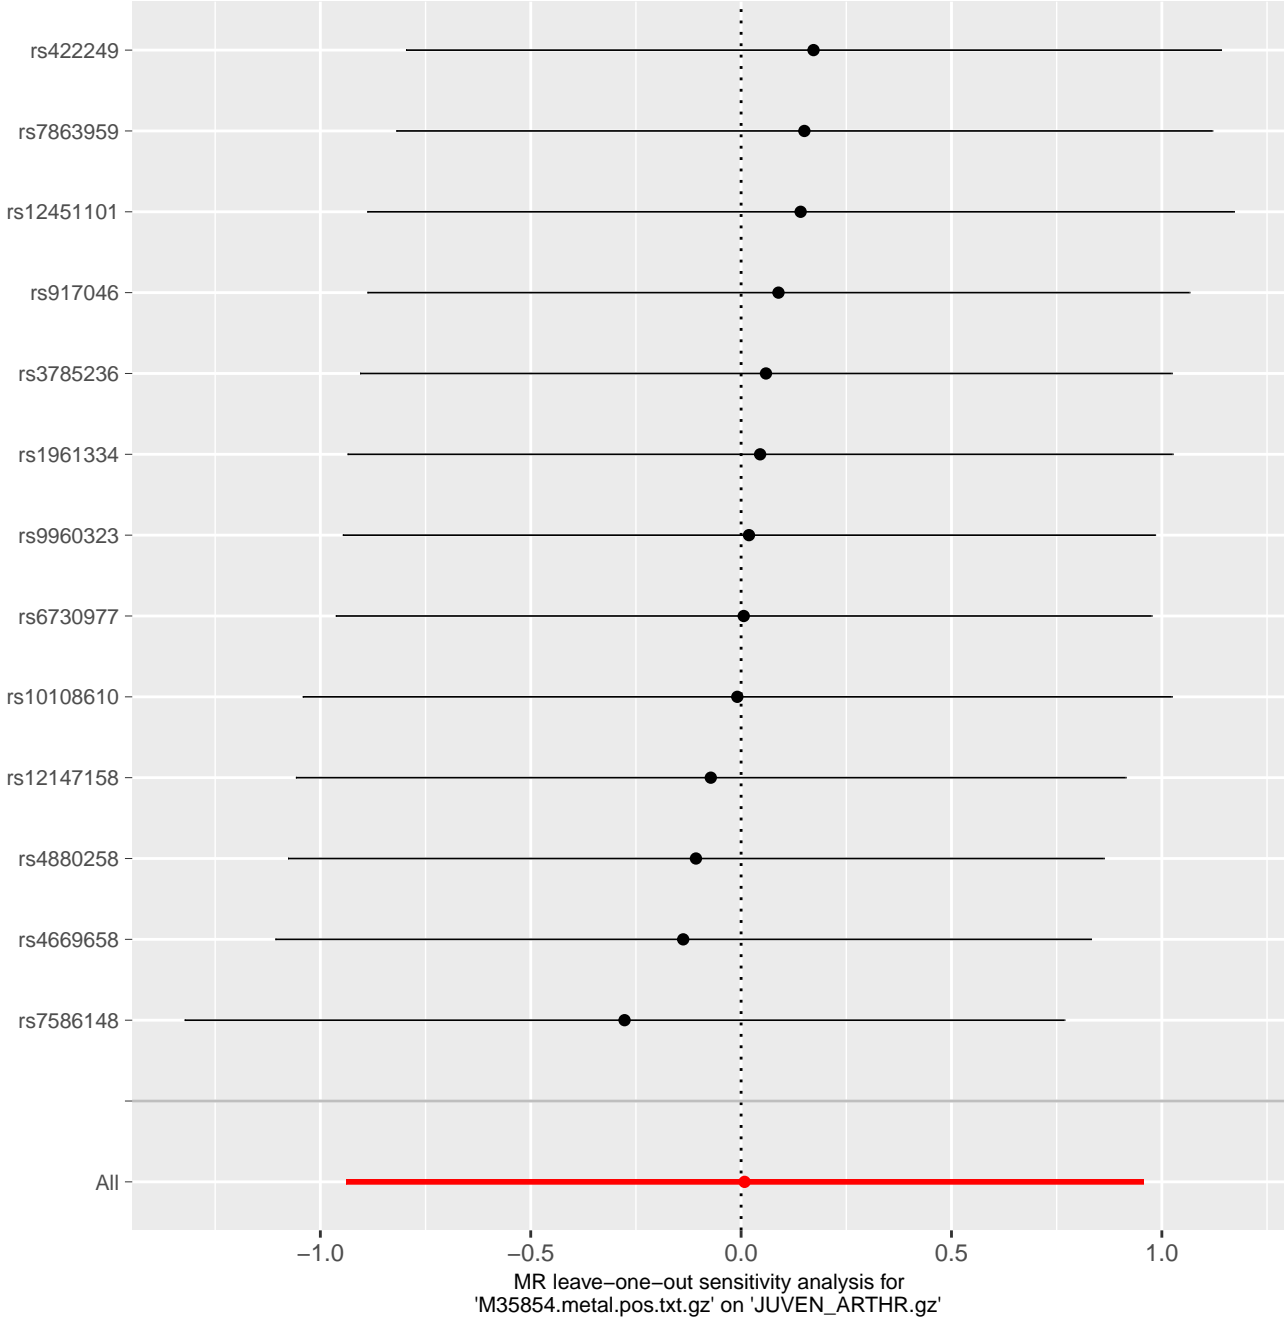

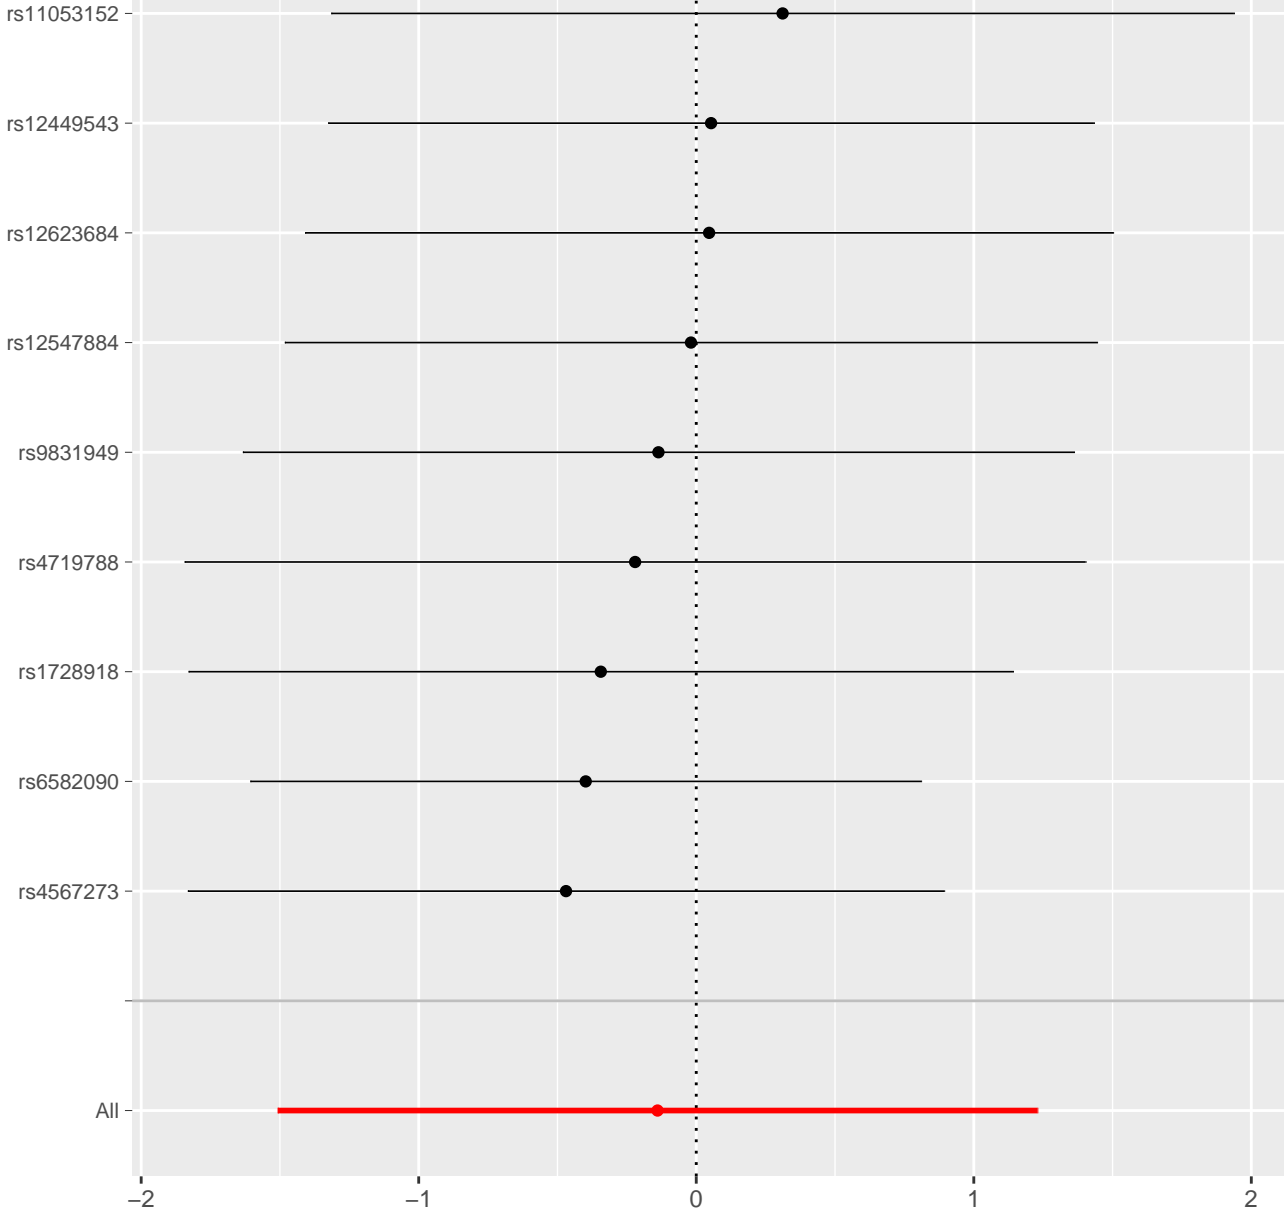

MR leave-one-out sensitivity analysis for 'M35977.metal.pos.txt.gz' on 'JUVEN\_ARTHR.gz'

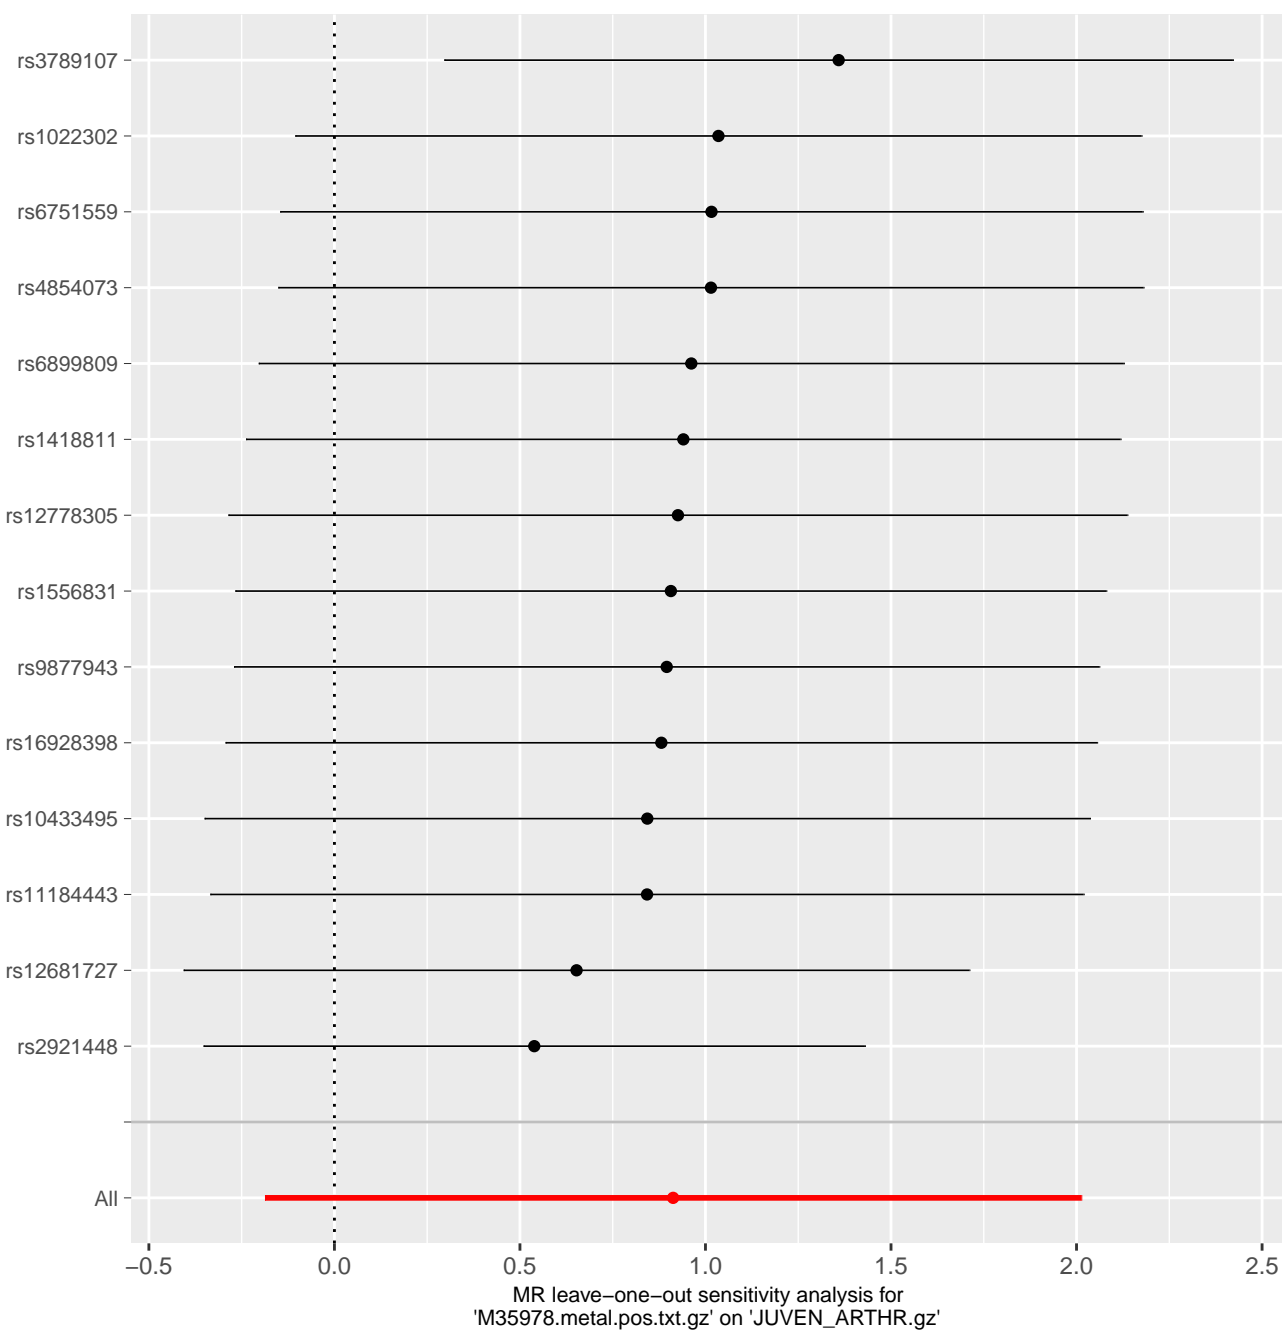

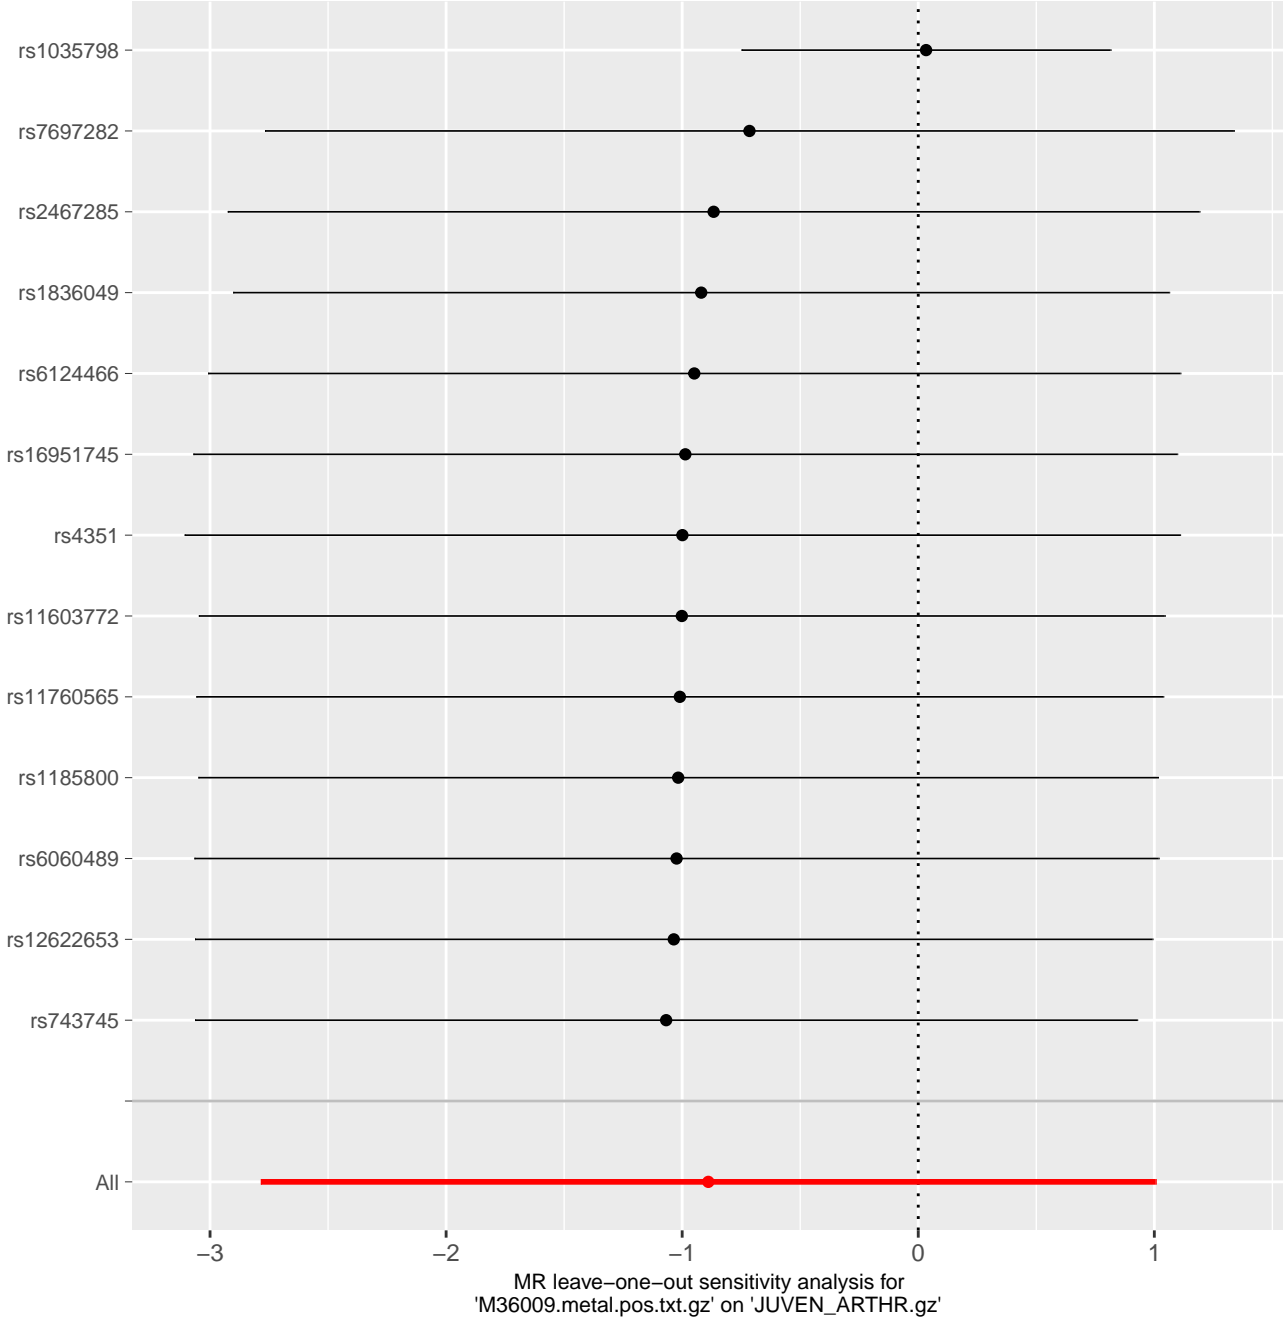

rs10765034

rs2163880

rs5765217

rs7092545

All

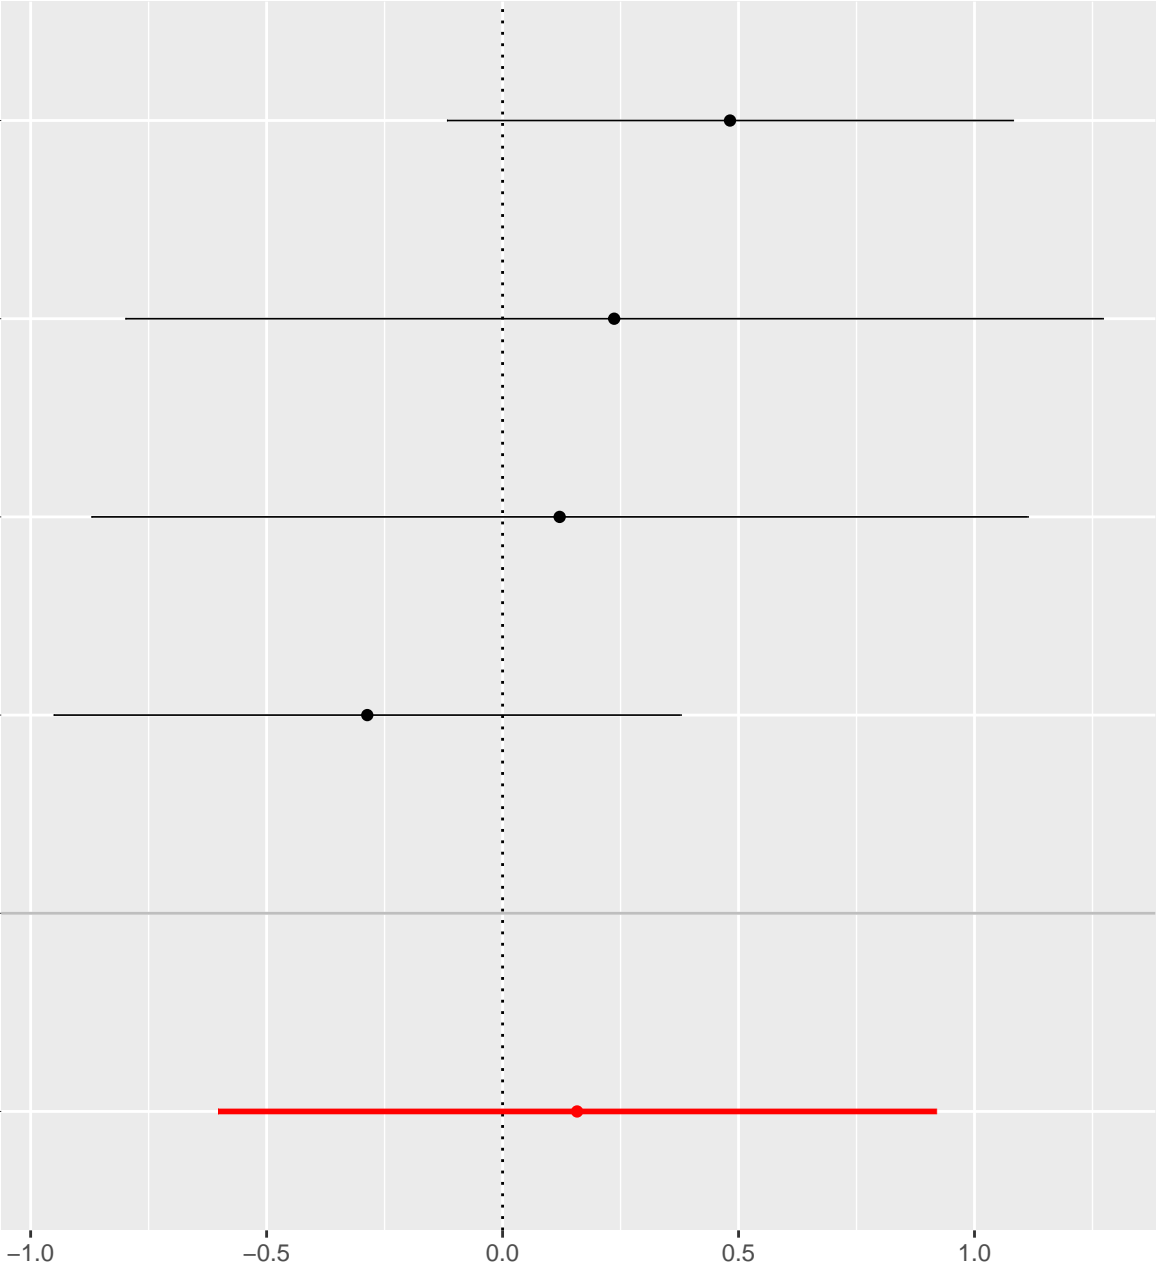

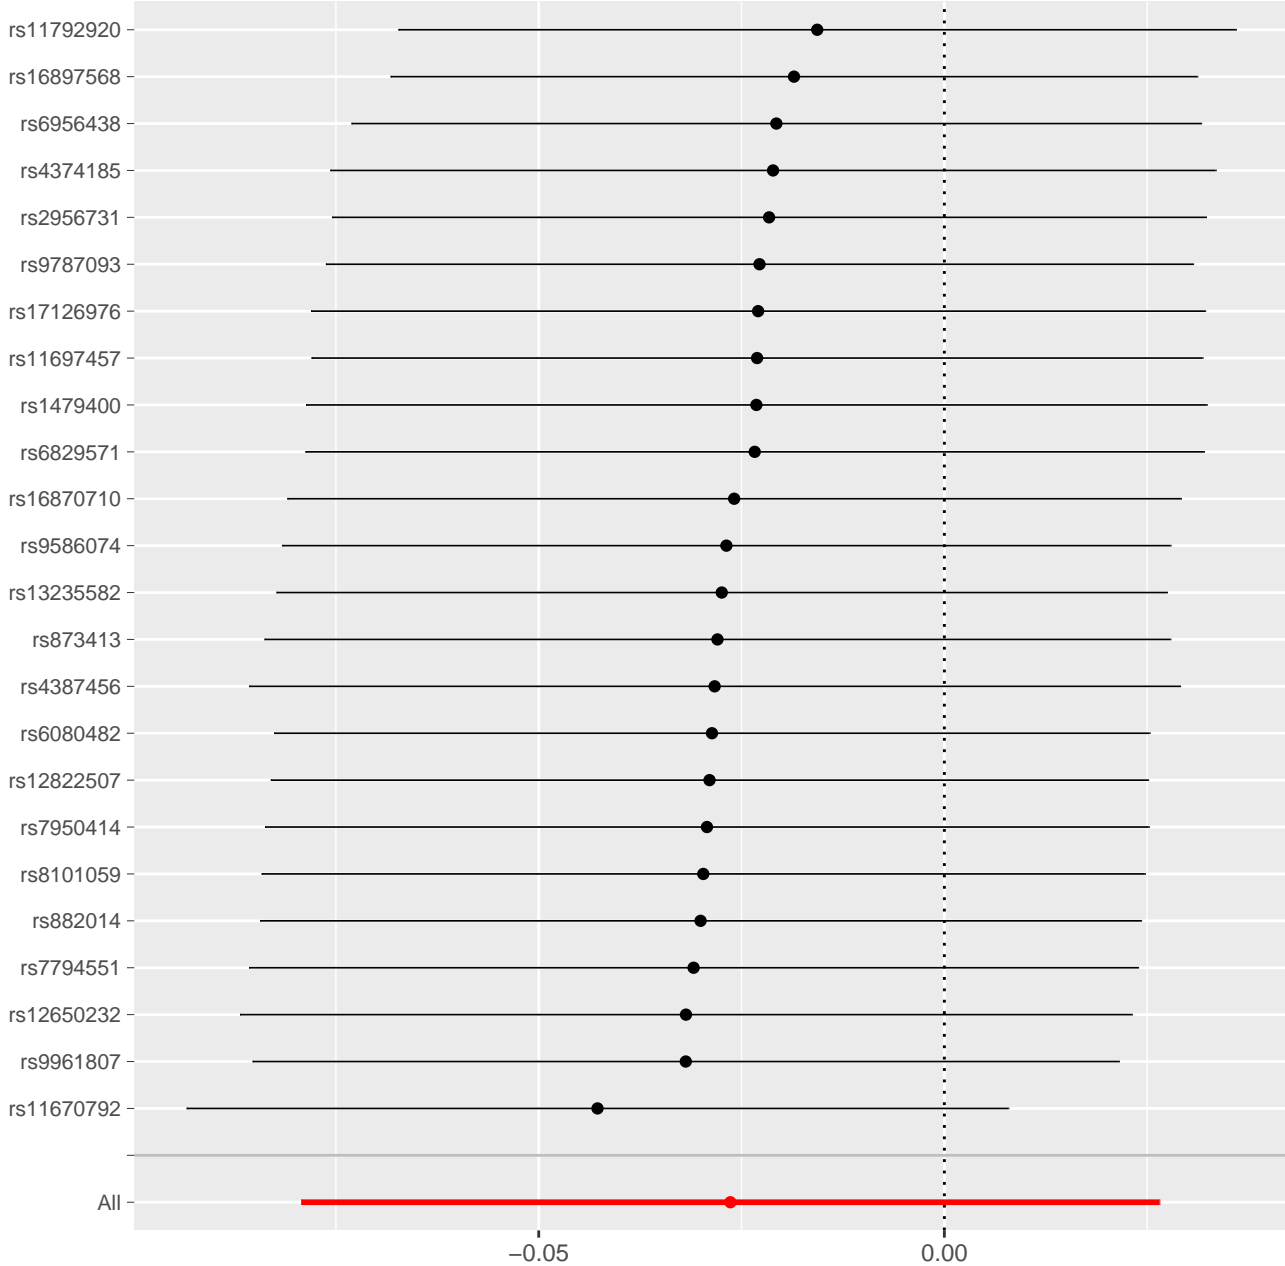

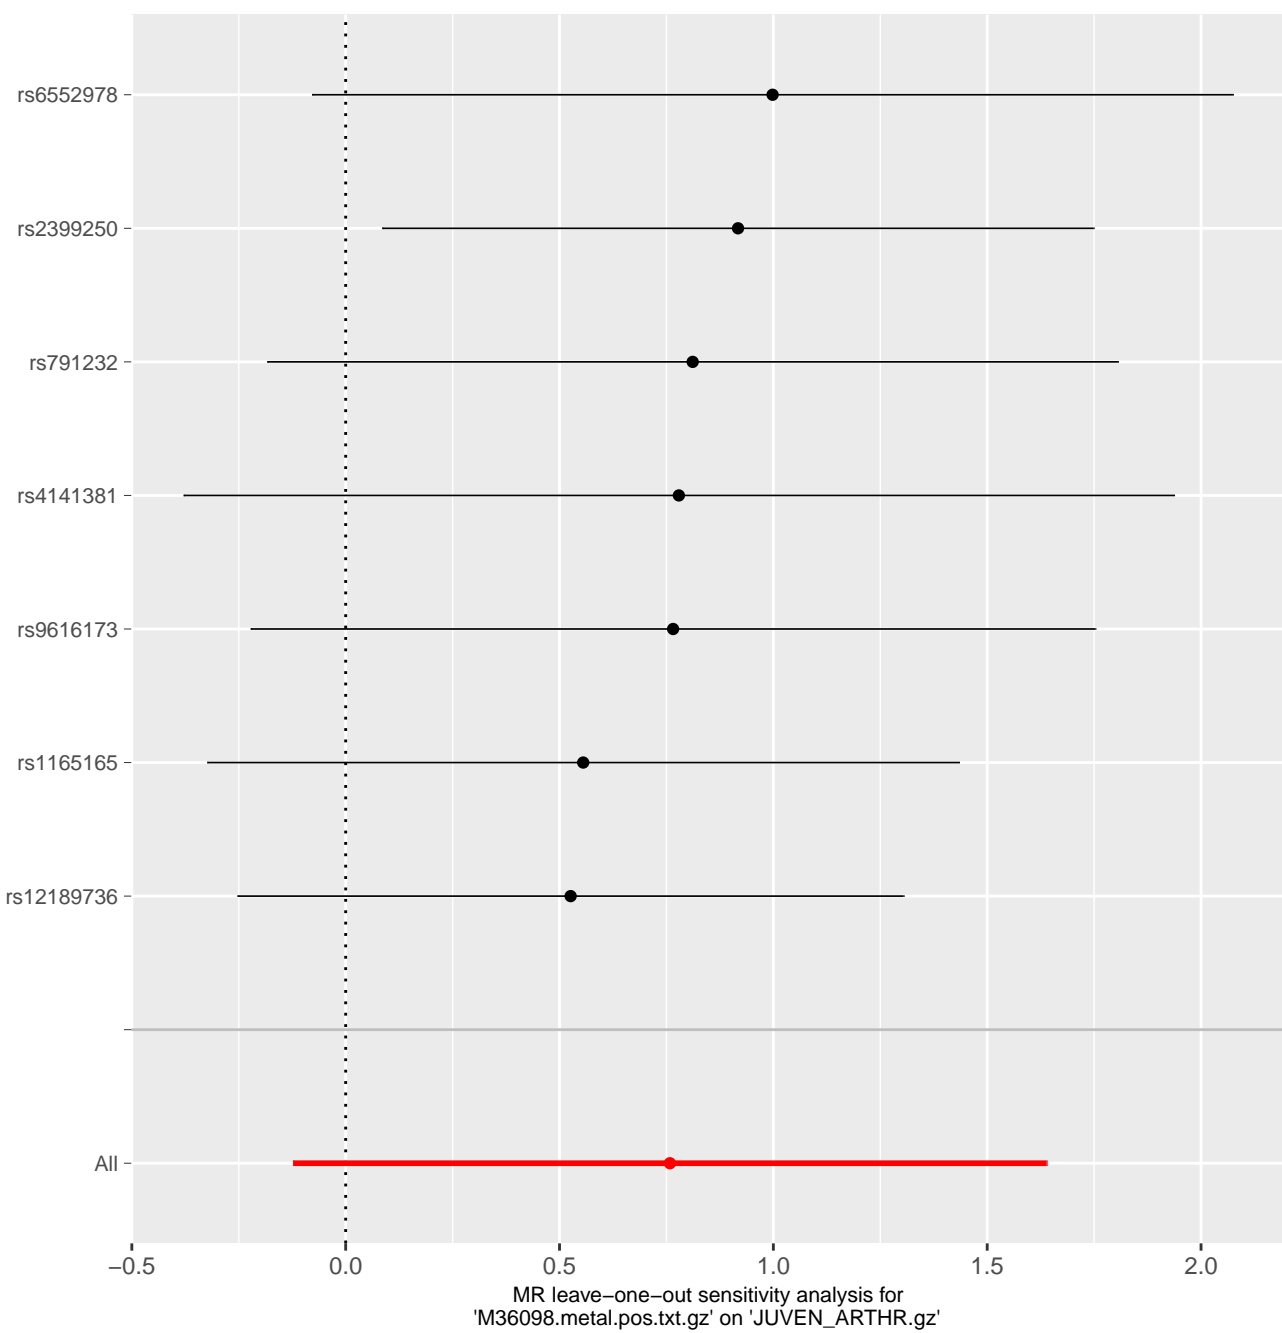

rs3935503

rs12412942

rs951918

rs17294478

rs1248821

rs16864115

All

-1

0

1

MR leave-one-out sensitivity analysis for  
'M36099.metal.pos.txt.gz' on 'JUVEN\_ARTHR.gz'

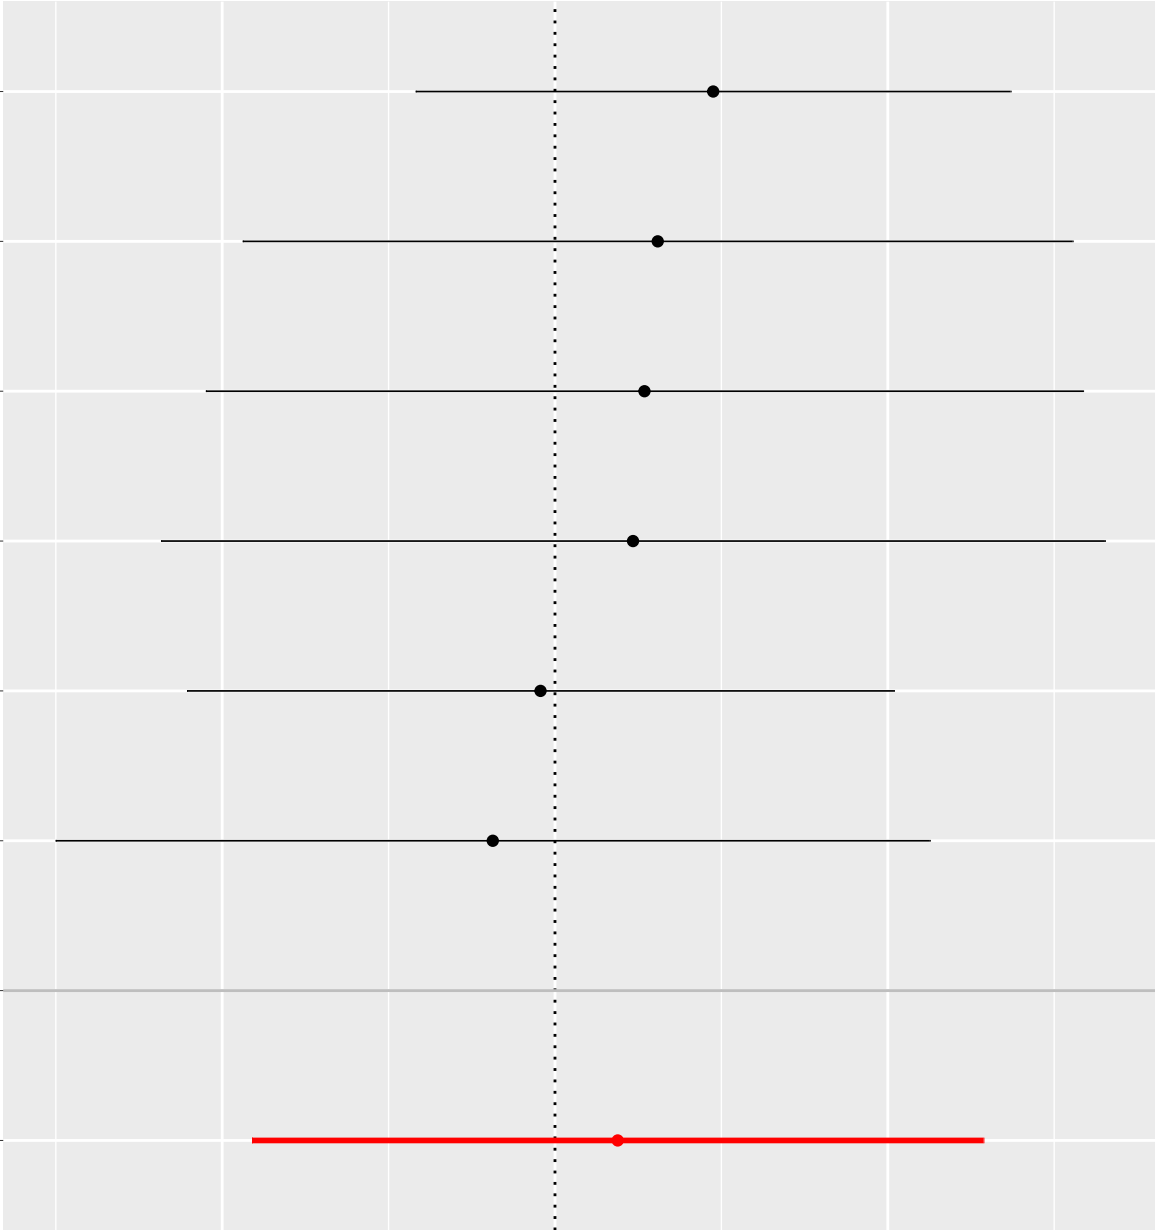



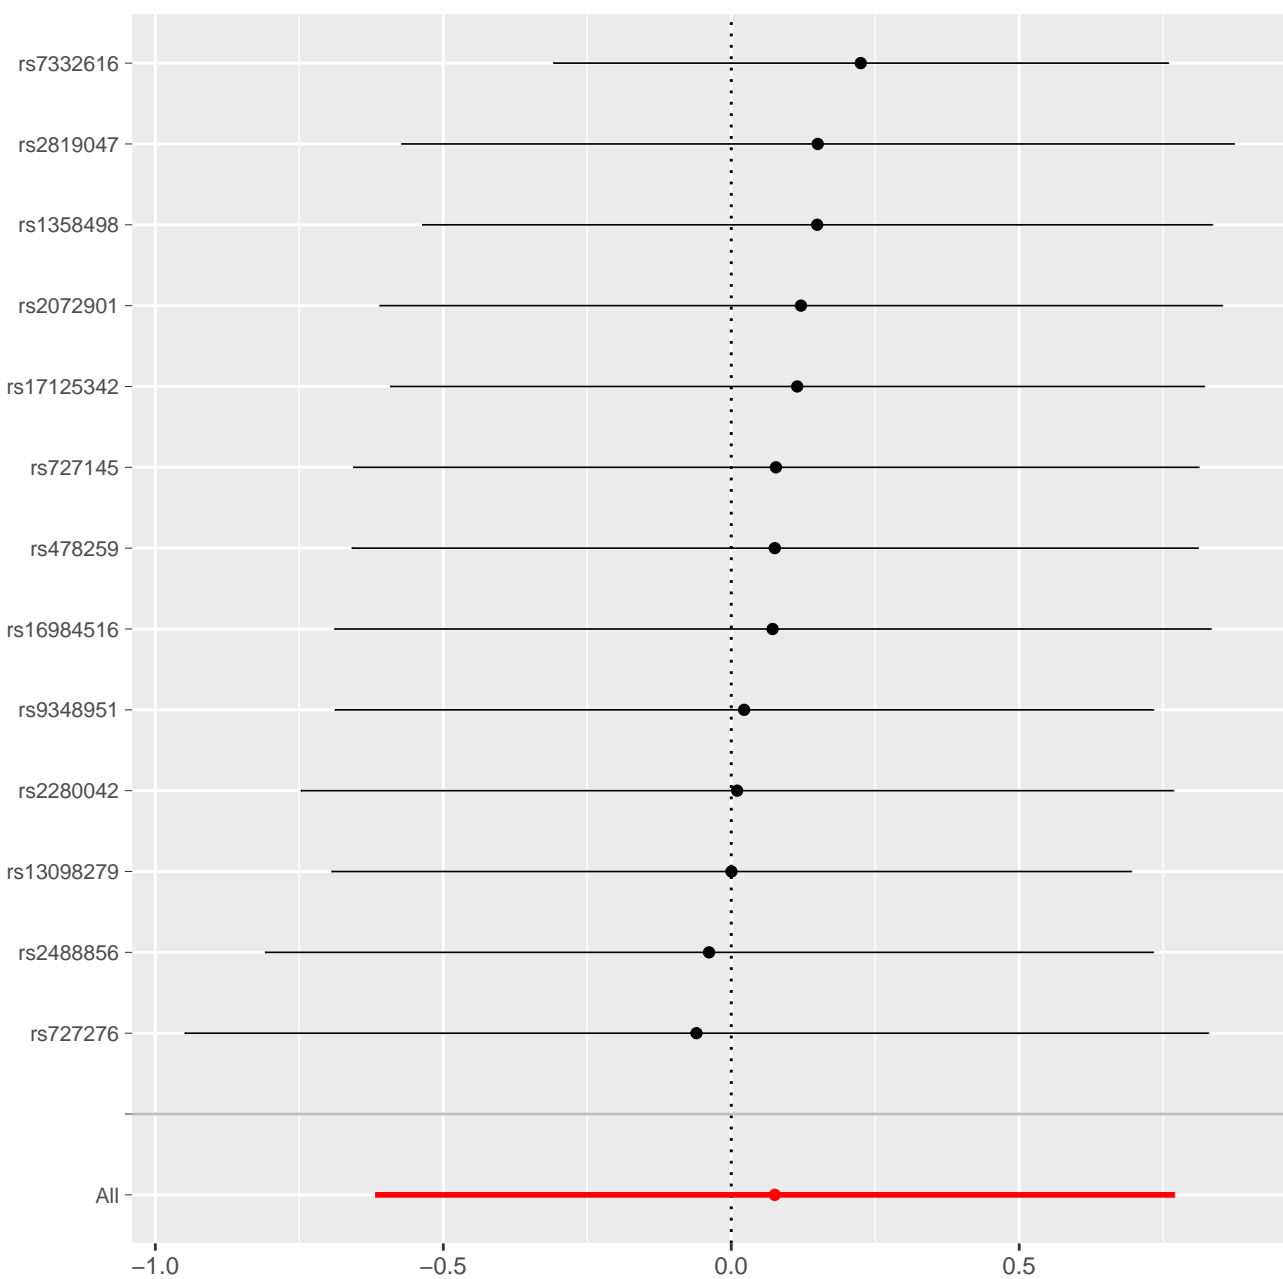

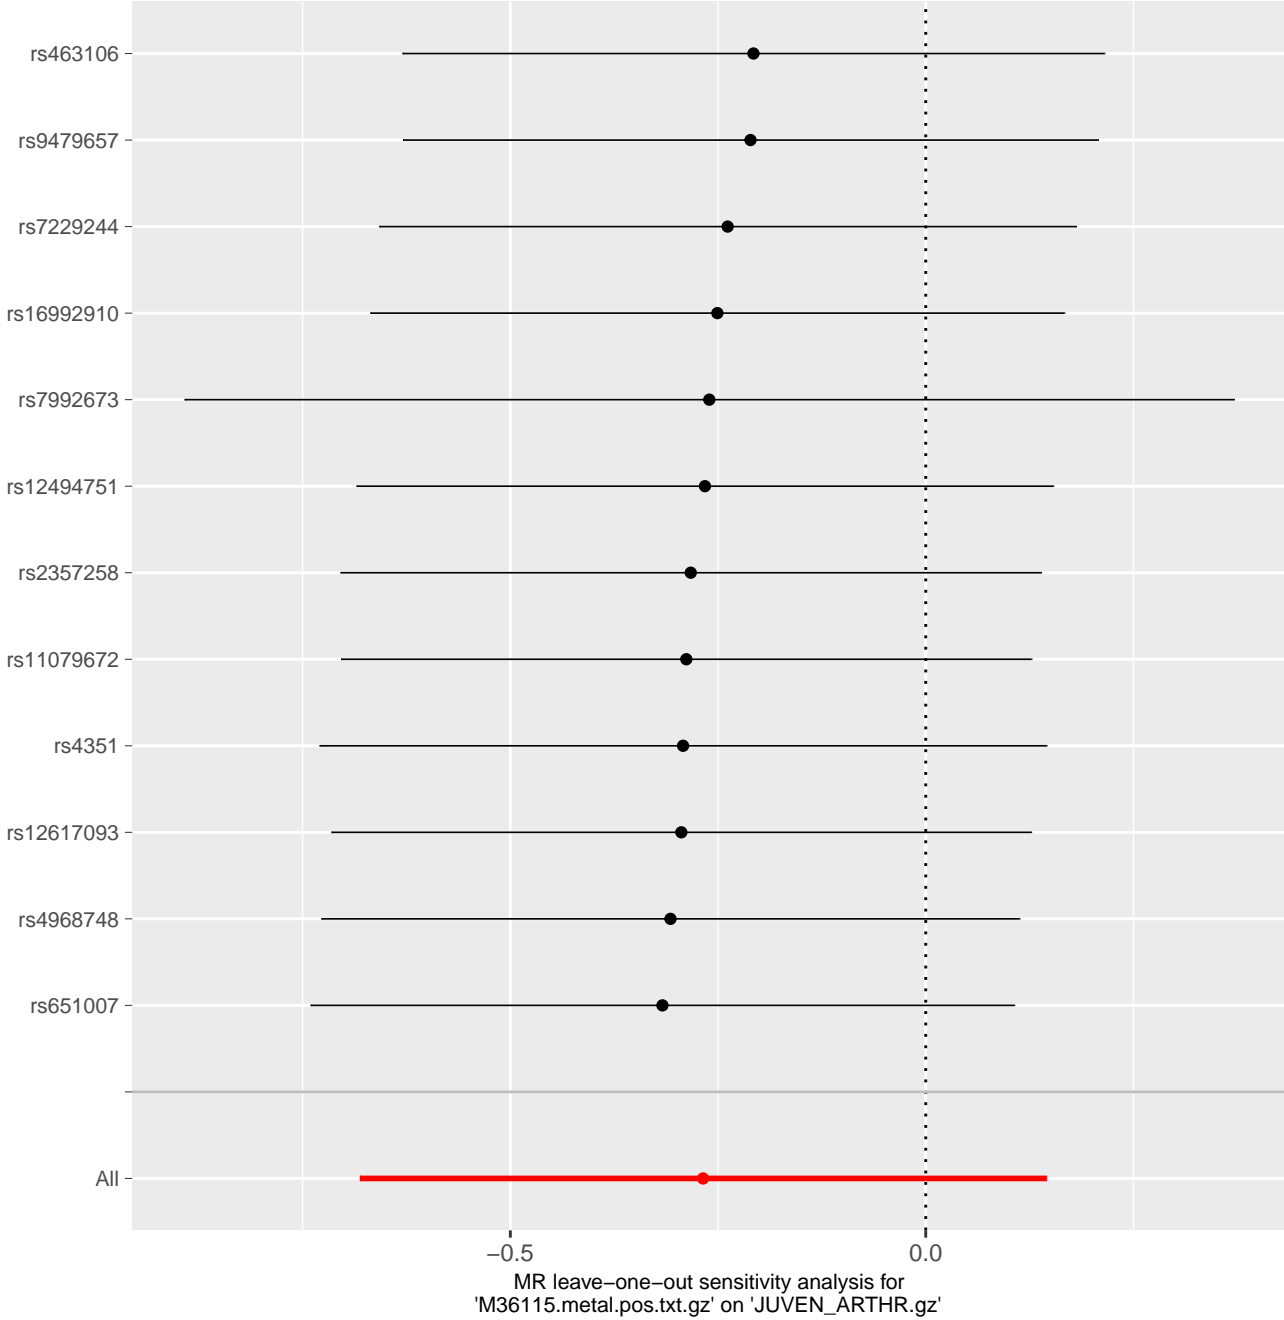

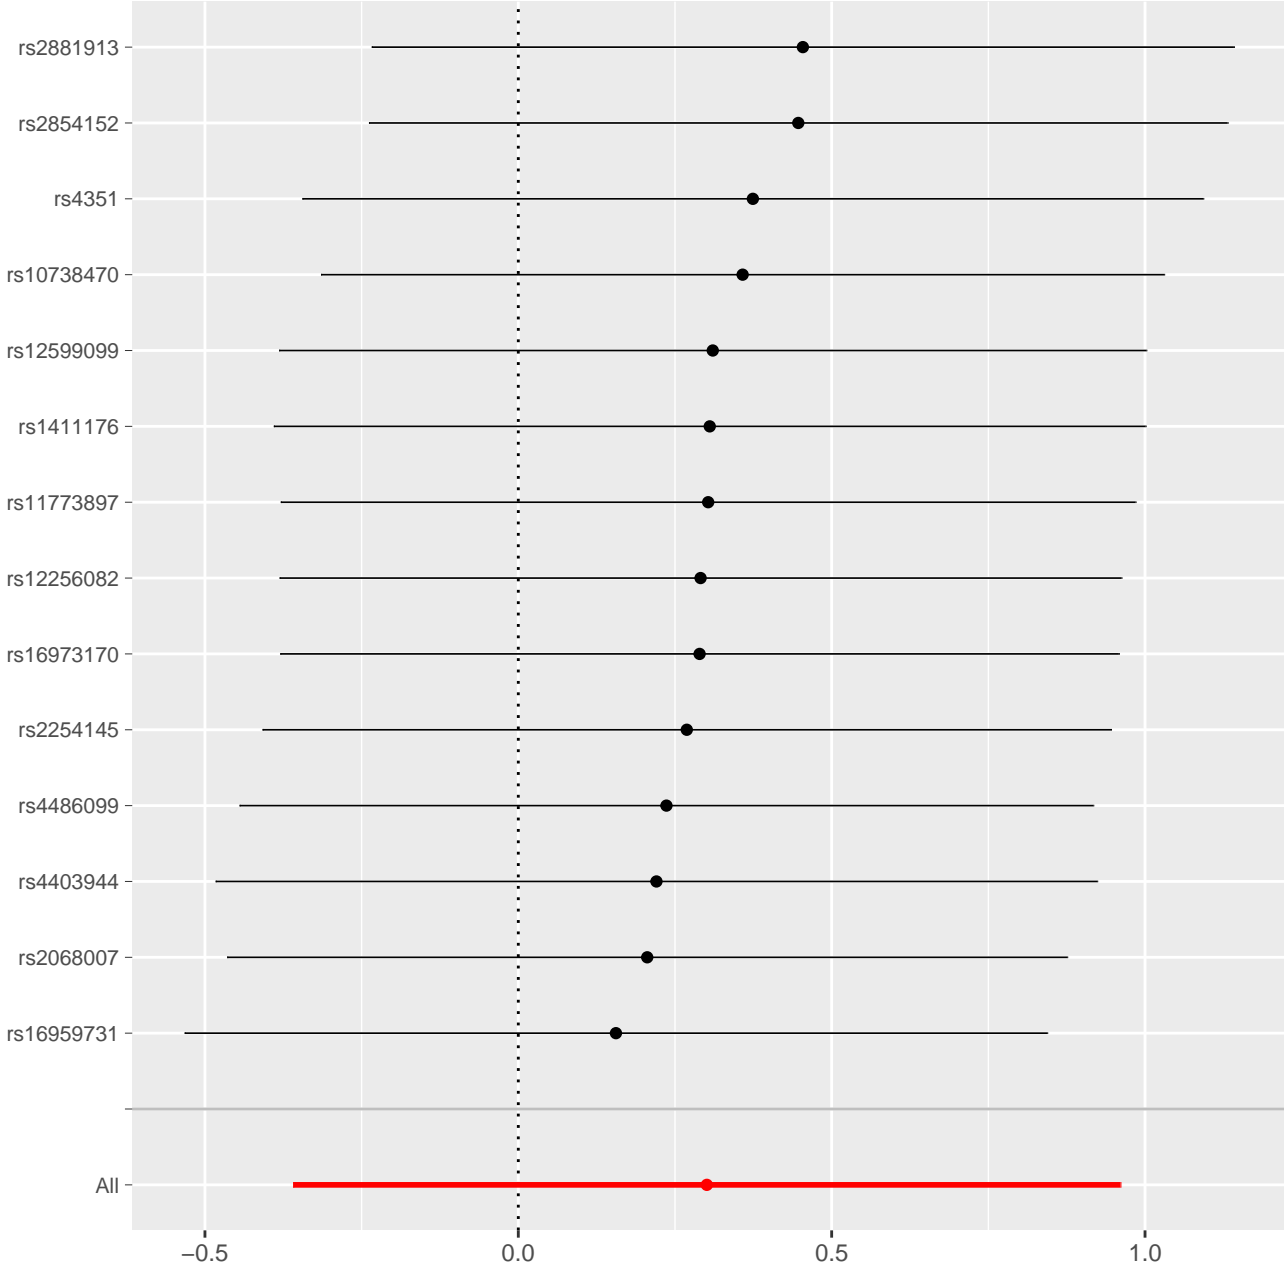

MR leave-one-out sensitivity analysis for 'M36131.metal.pos.txt.gz' on 'JUVEN\_ARTHR.gz'

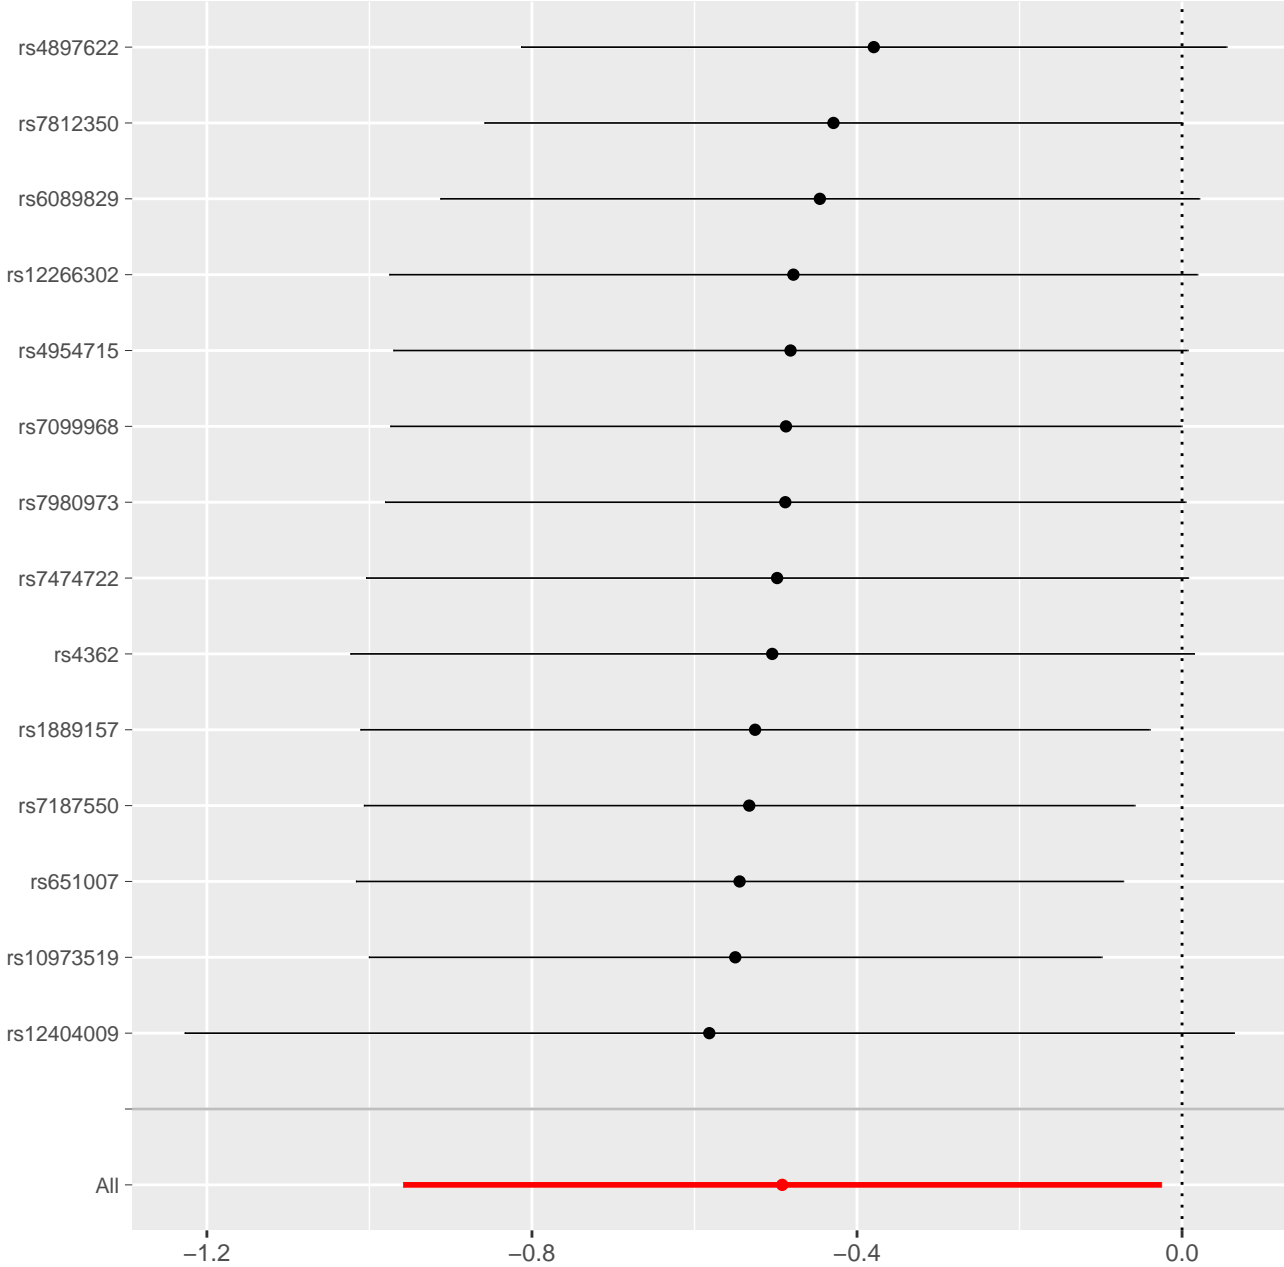

MR leave-one-out sensitivity analysis for 'M36134.metal.pos.txt.gz' on 'JUVEN\_ARTHR.gz'

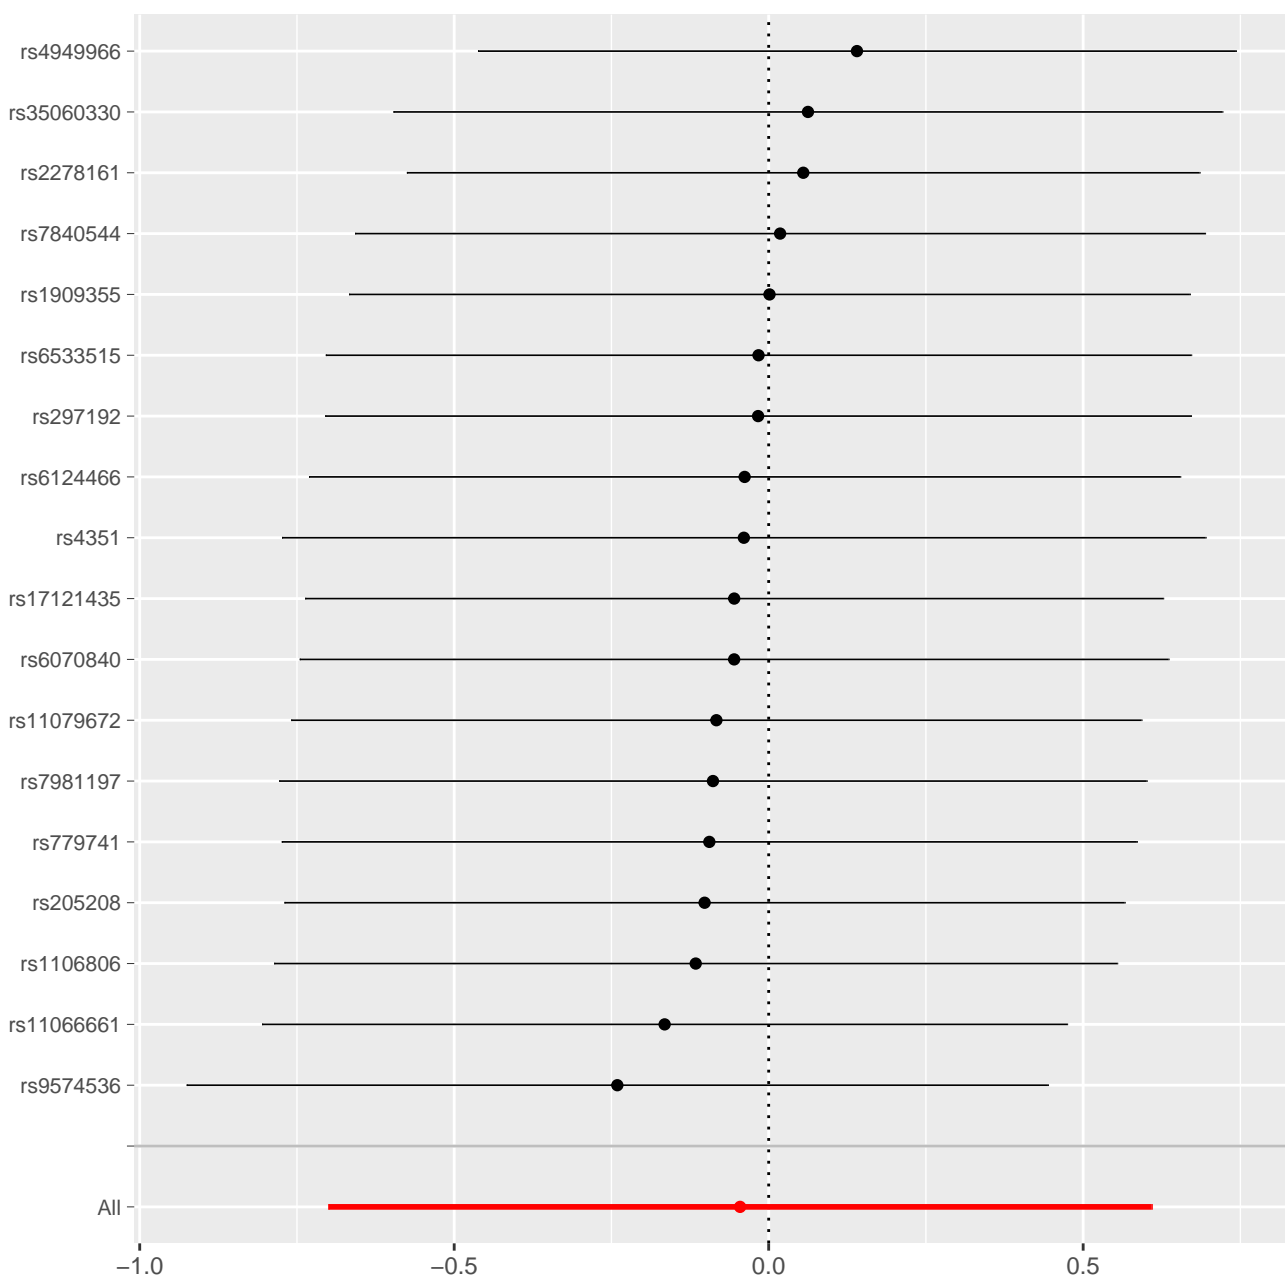

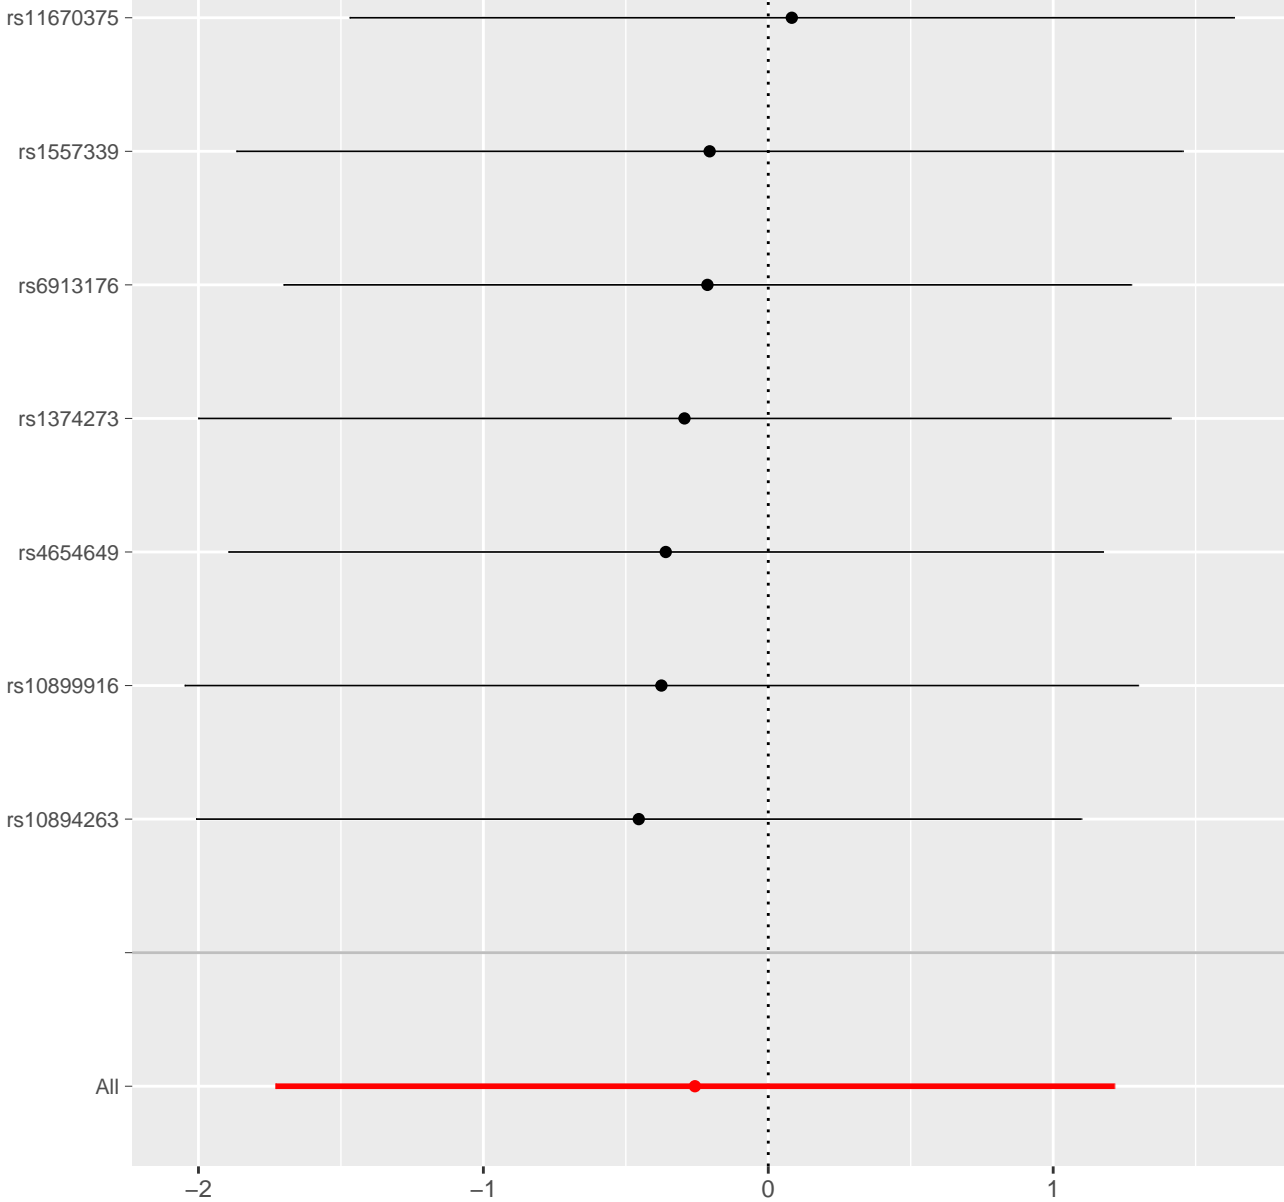

MR leave-one-out sensitivity analysis for 'M36300.metal.pos.txt.gz' on 'JUVEN\_ARTHR.gz'

rs7021014

rs1192458

rs1893285

rs2874702

All

-1

0

1

MR leave-one-out sensitivity analysis for  
'M36376.metal.pos.txt.gz' on 'JUVEN\_ARTHR.gz'

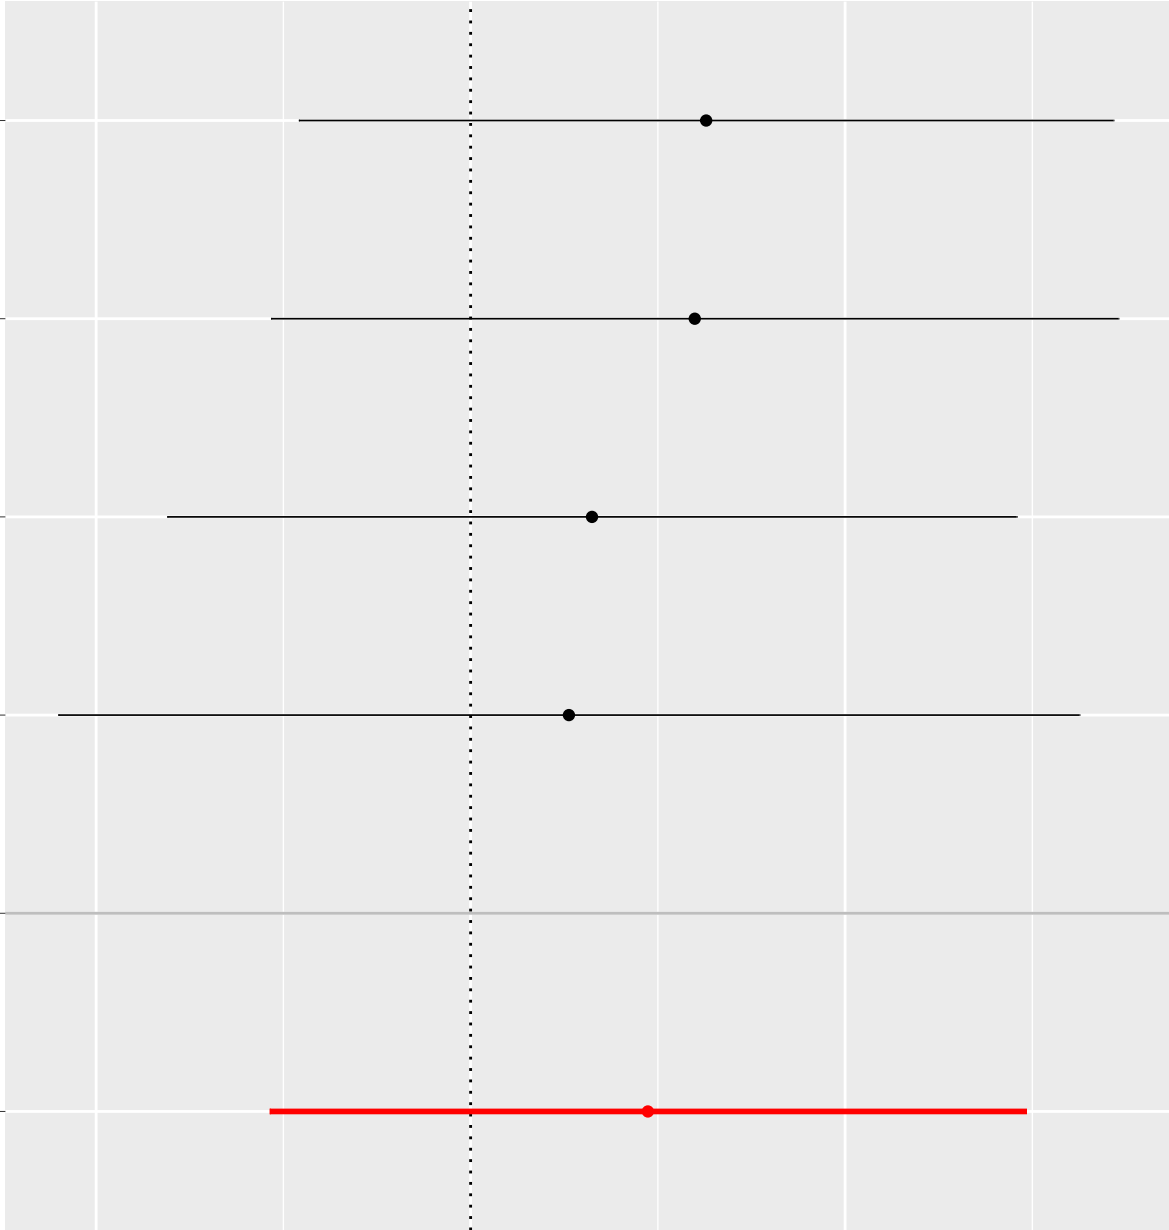

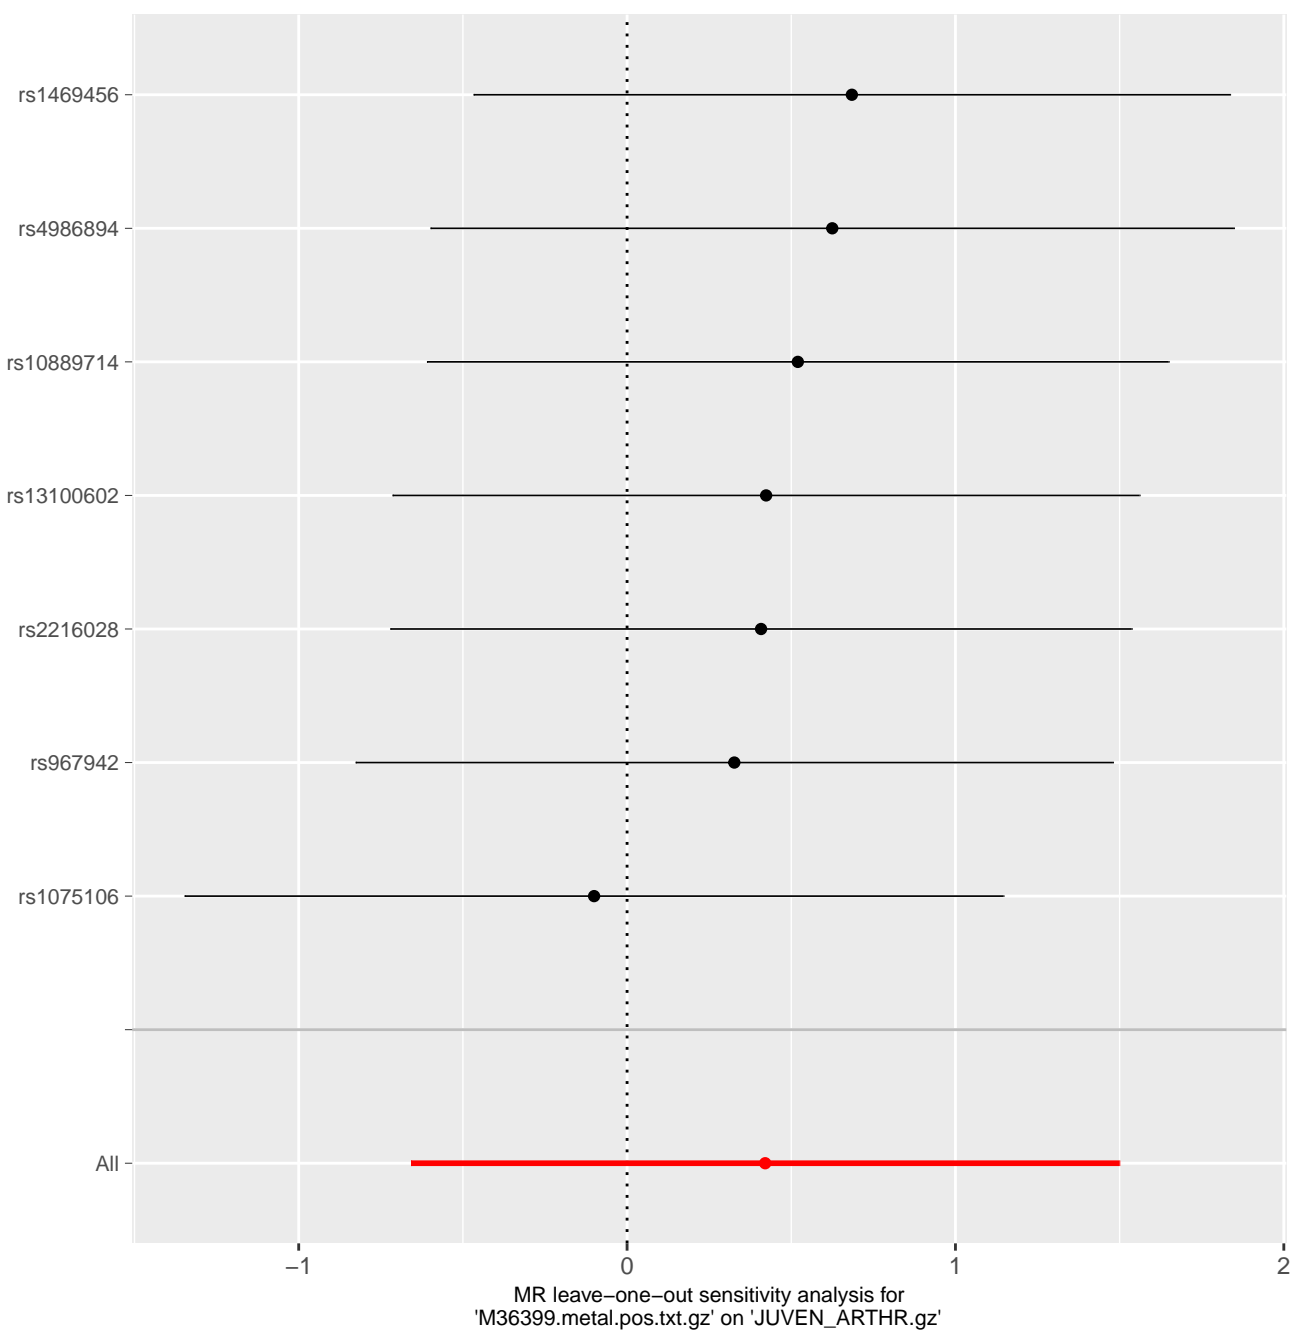



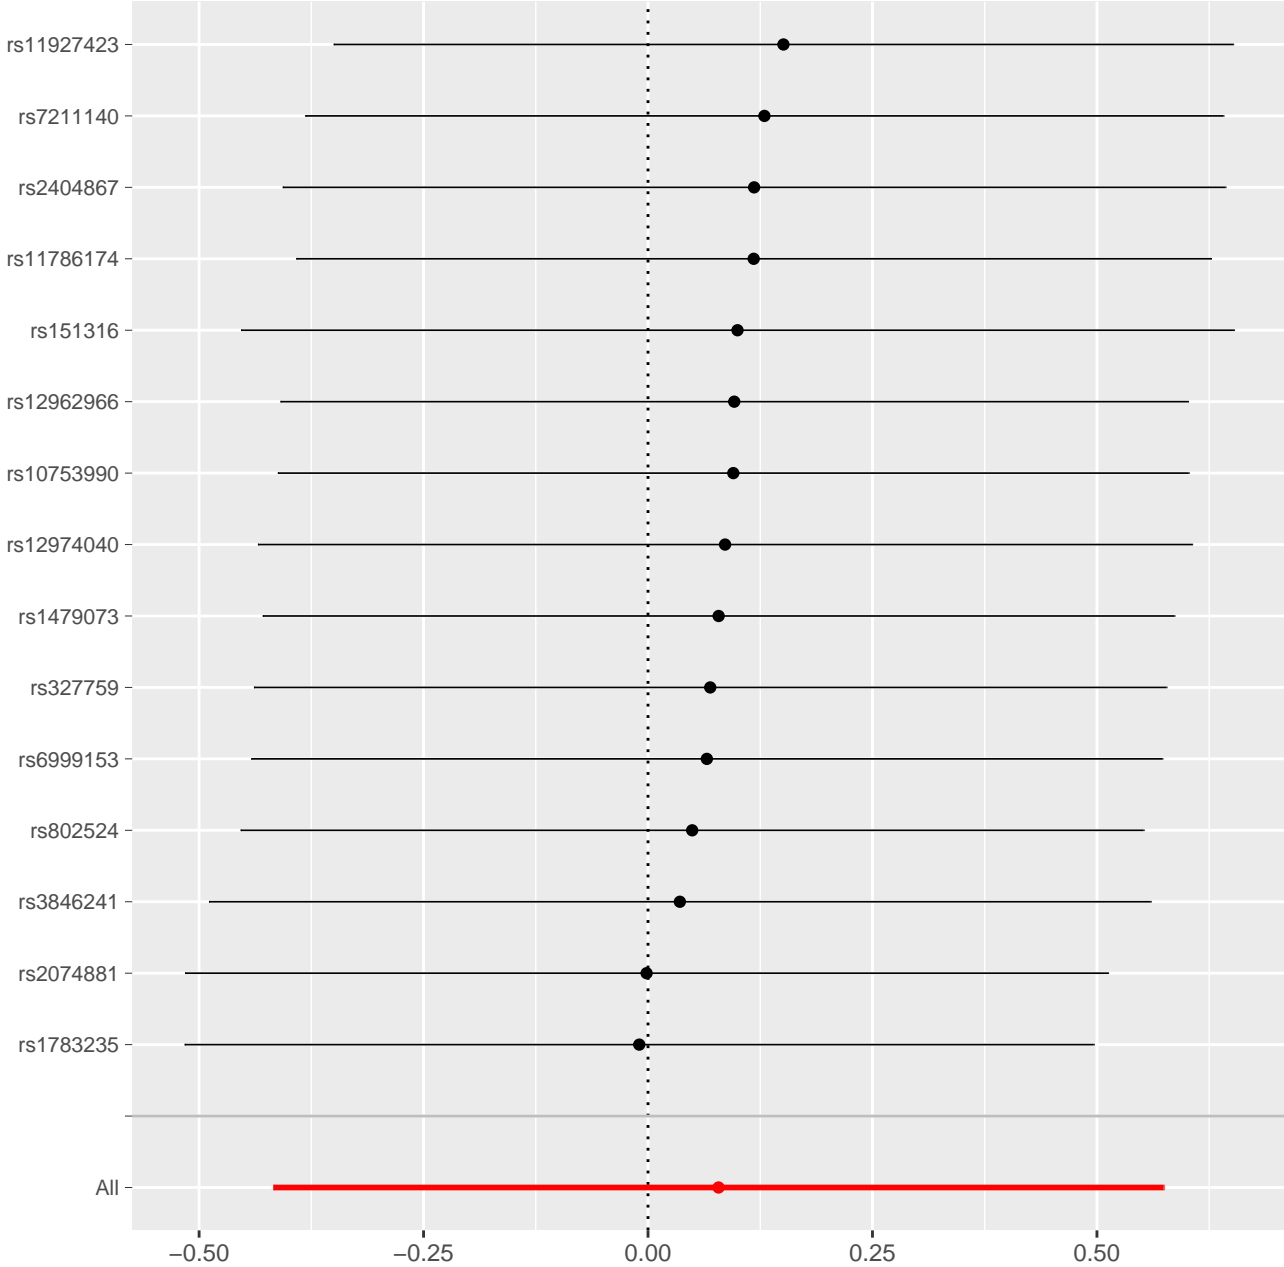

MR leave-one-out sensitivity analysis for 'M36468.metal.pos.txt.gz' on 'JUVEN\_ARTHR.gz'

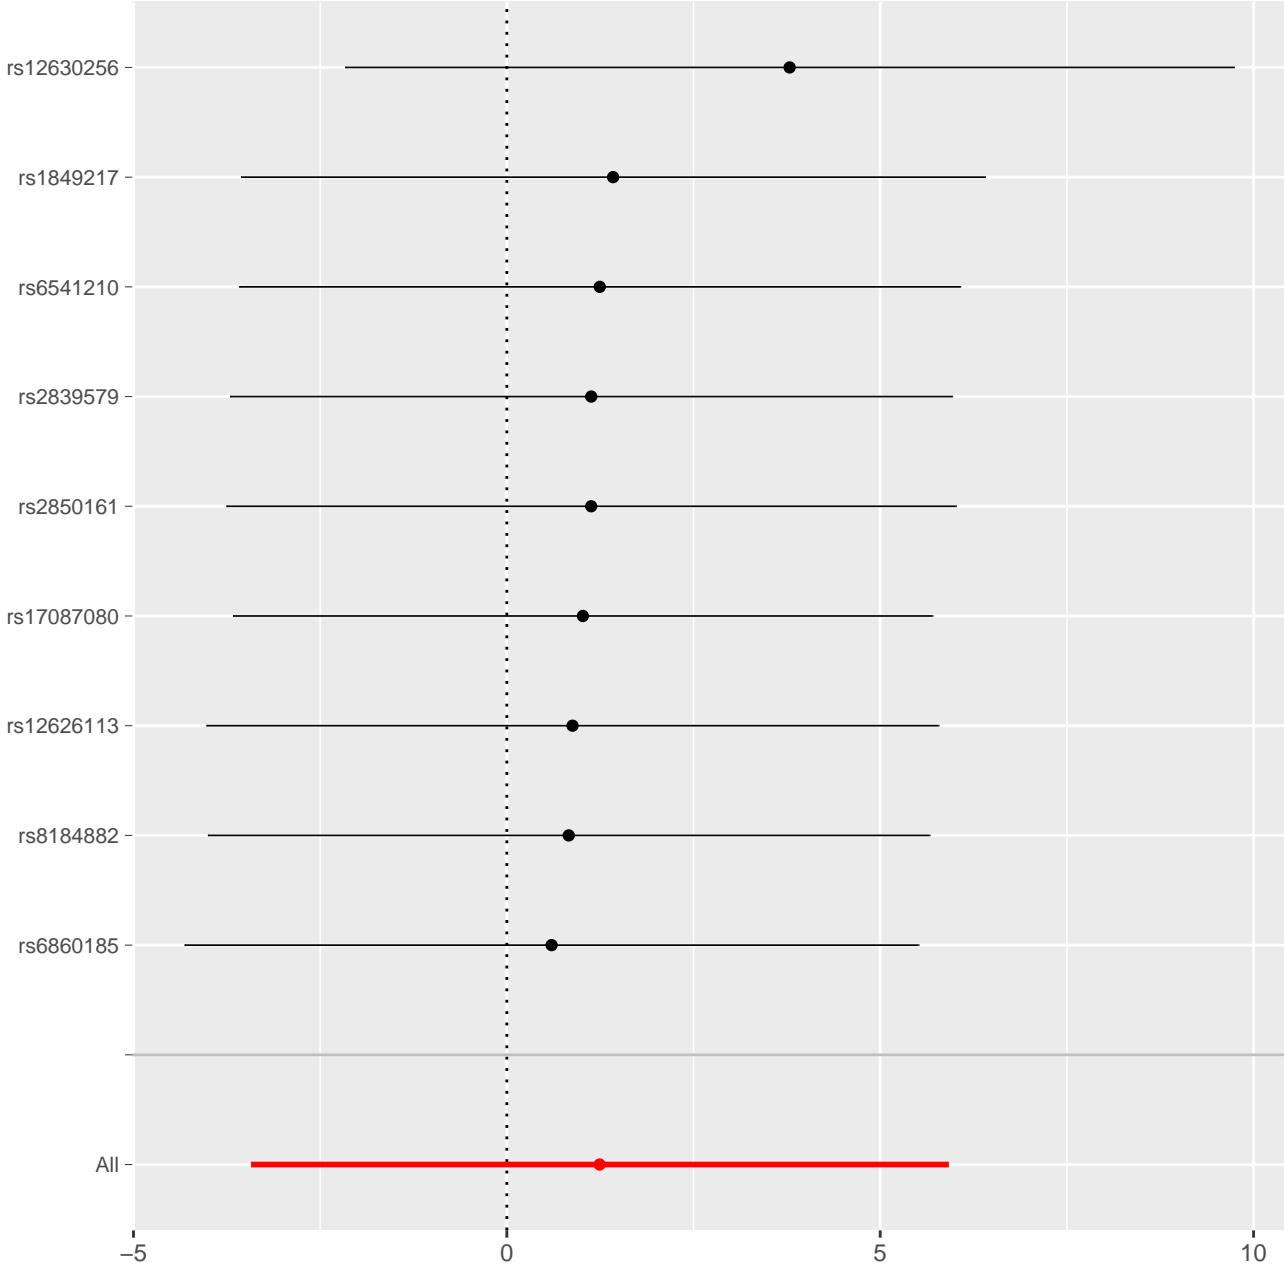

MR leave-one-out sensitivity analysis for 'M36515.metal.pos.txt.gz' on 'JUVEN\_ARTHR.gz'

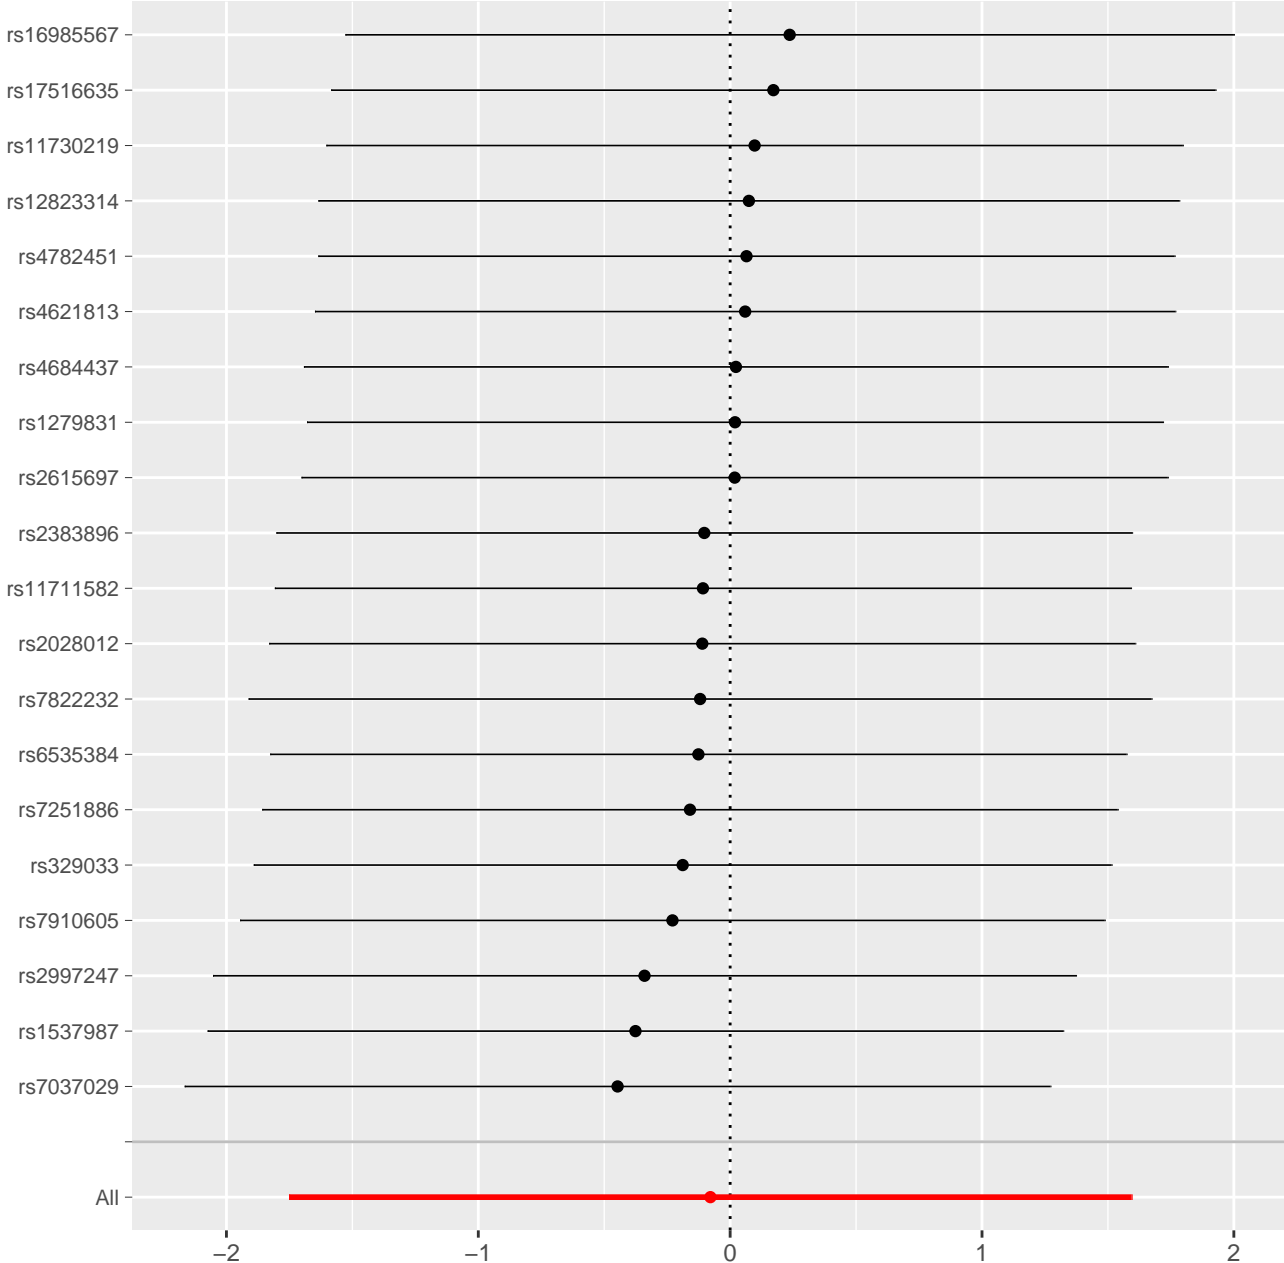

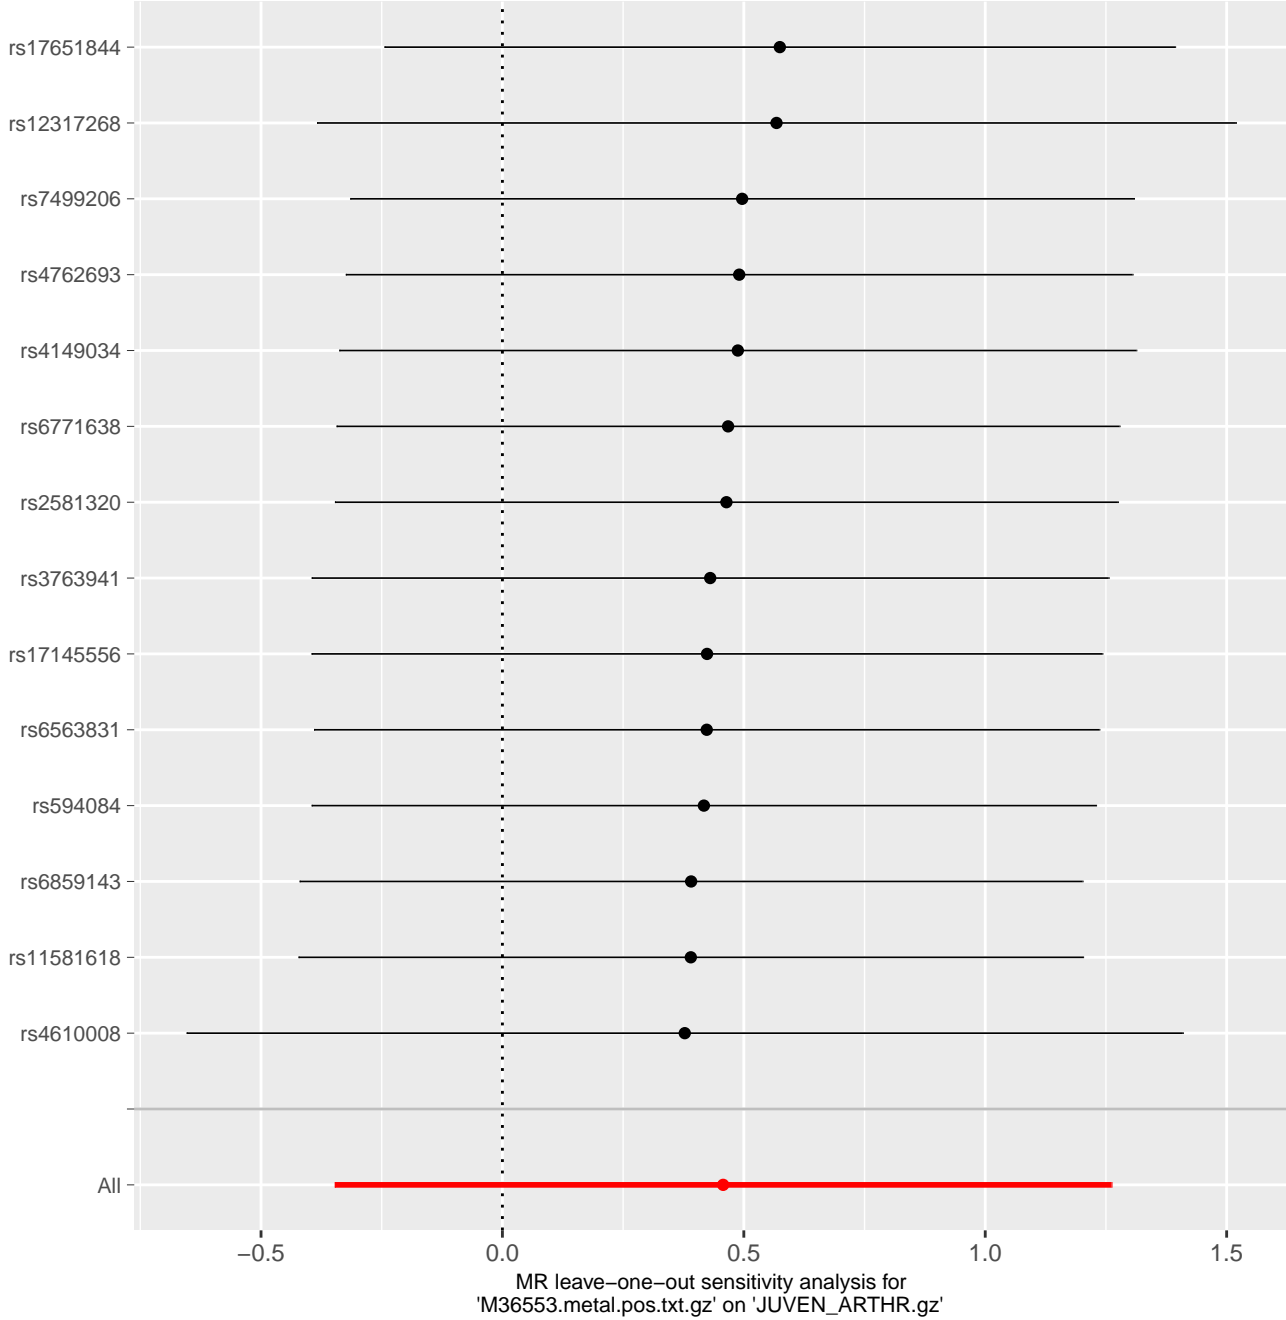

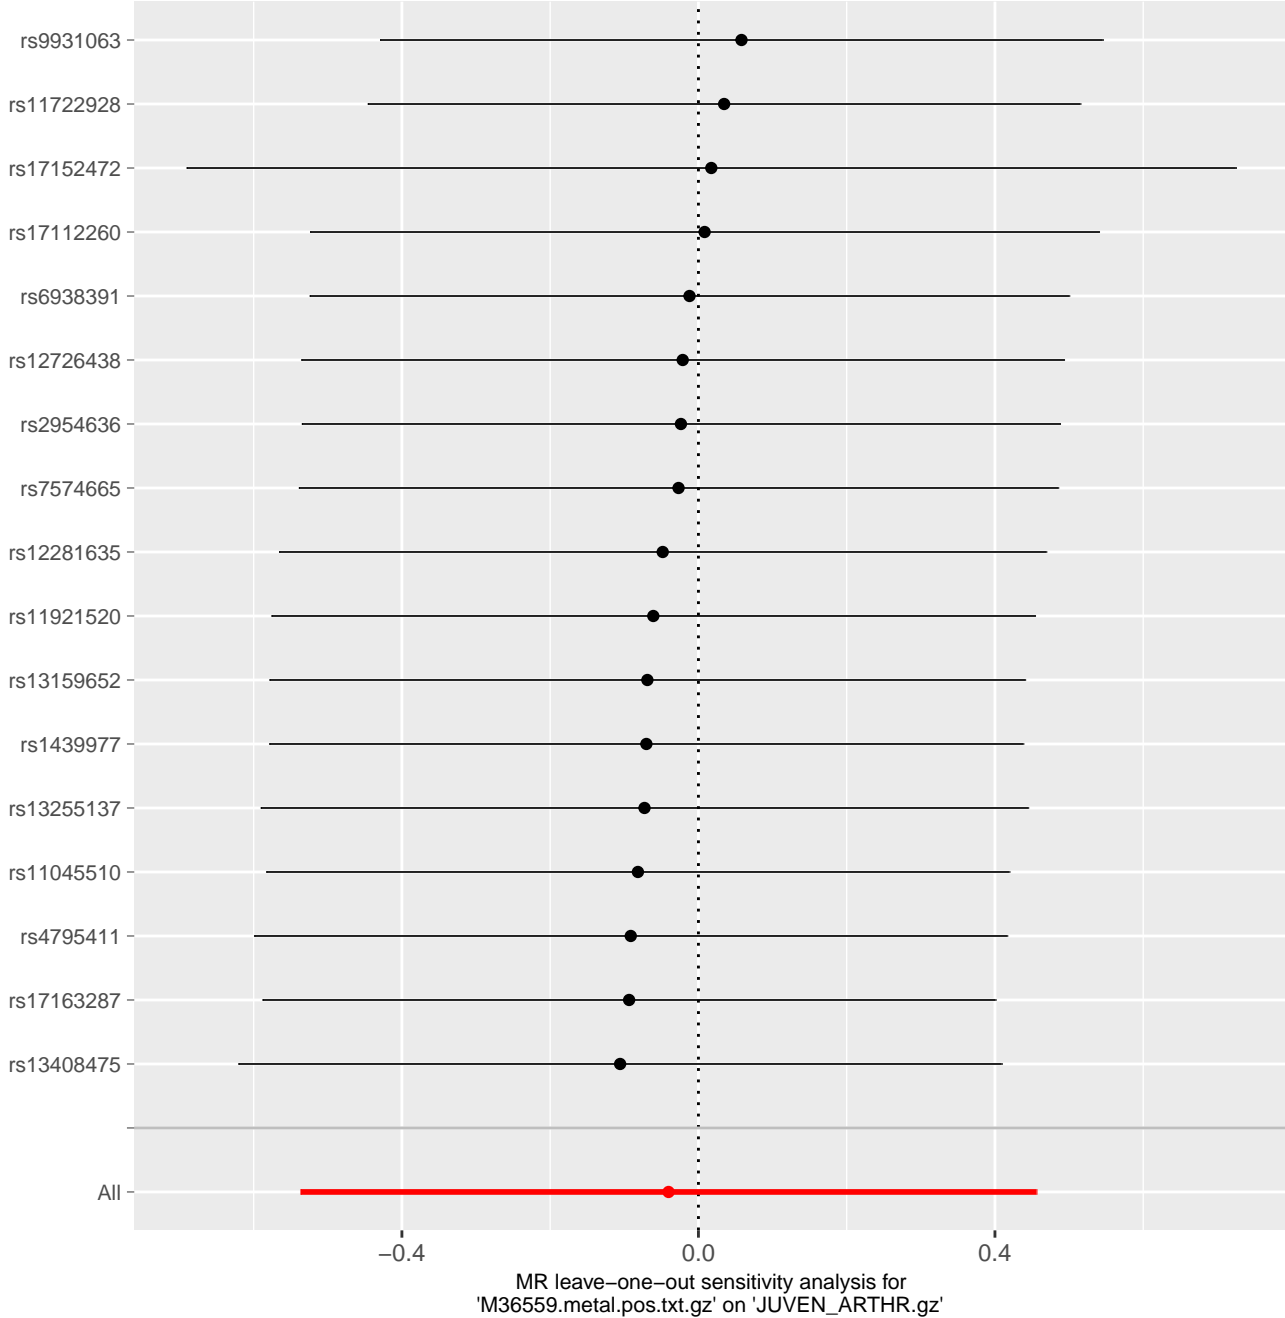

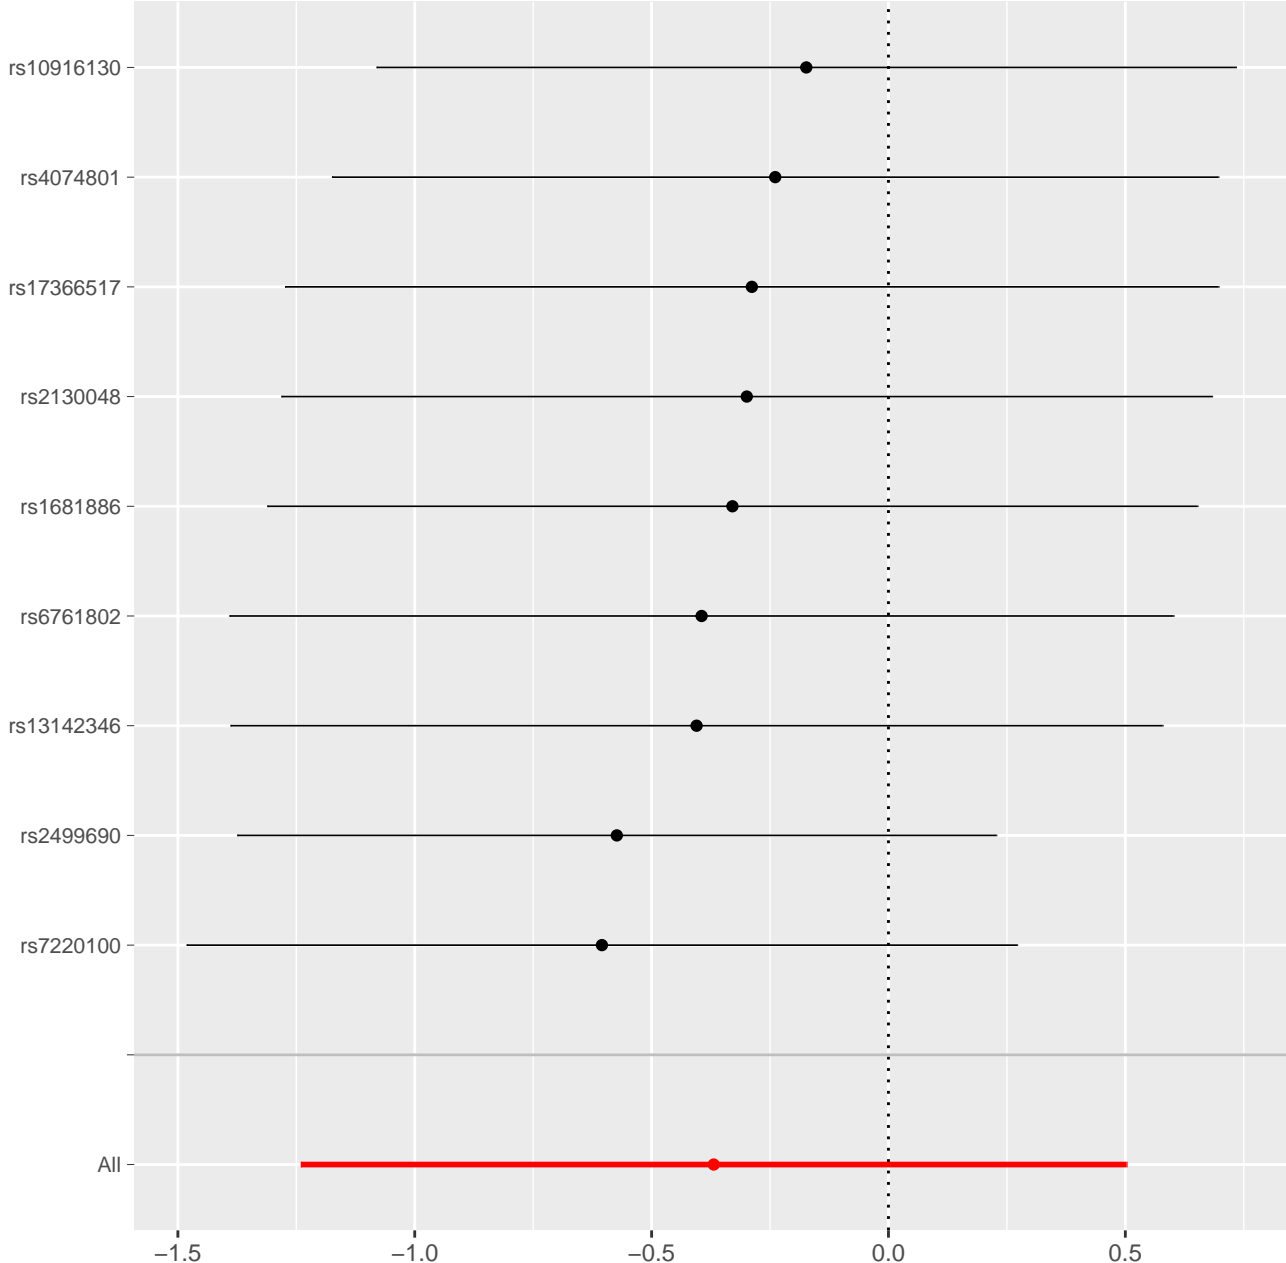

MR leave-one-out sensitivity analysis for 'M36585.metal.pos.txt.gz' on 'JUVEN\_ARTHR.gz'

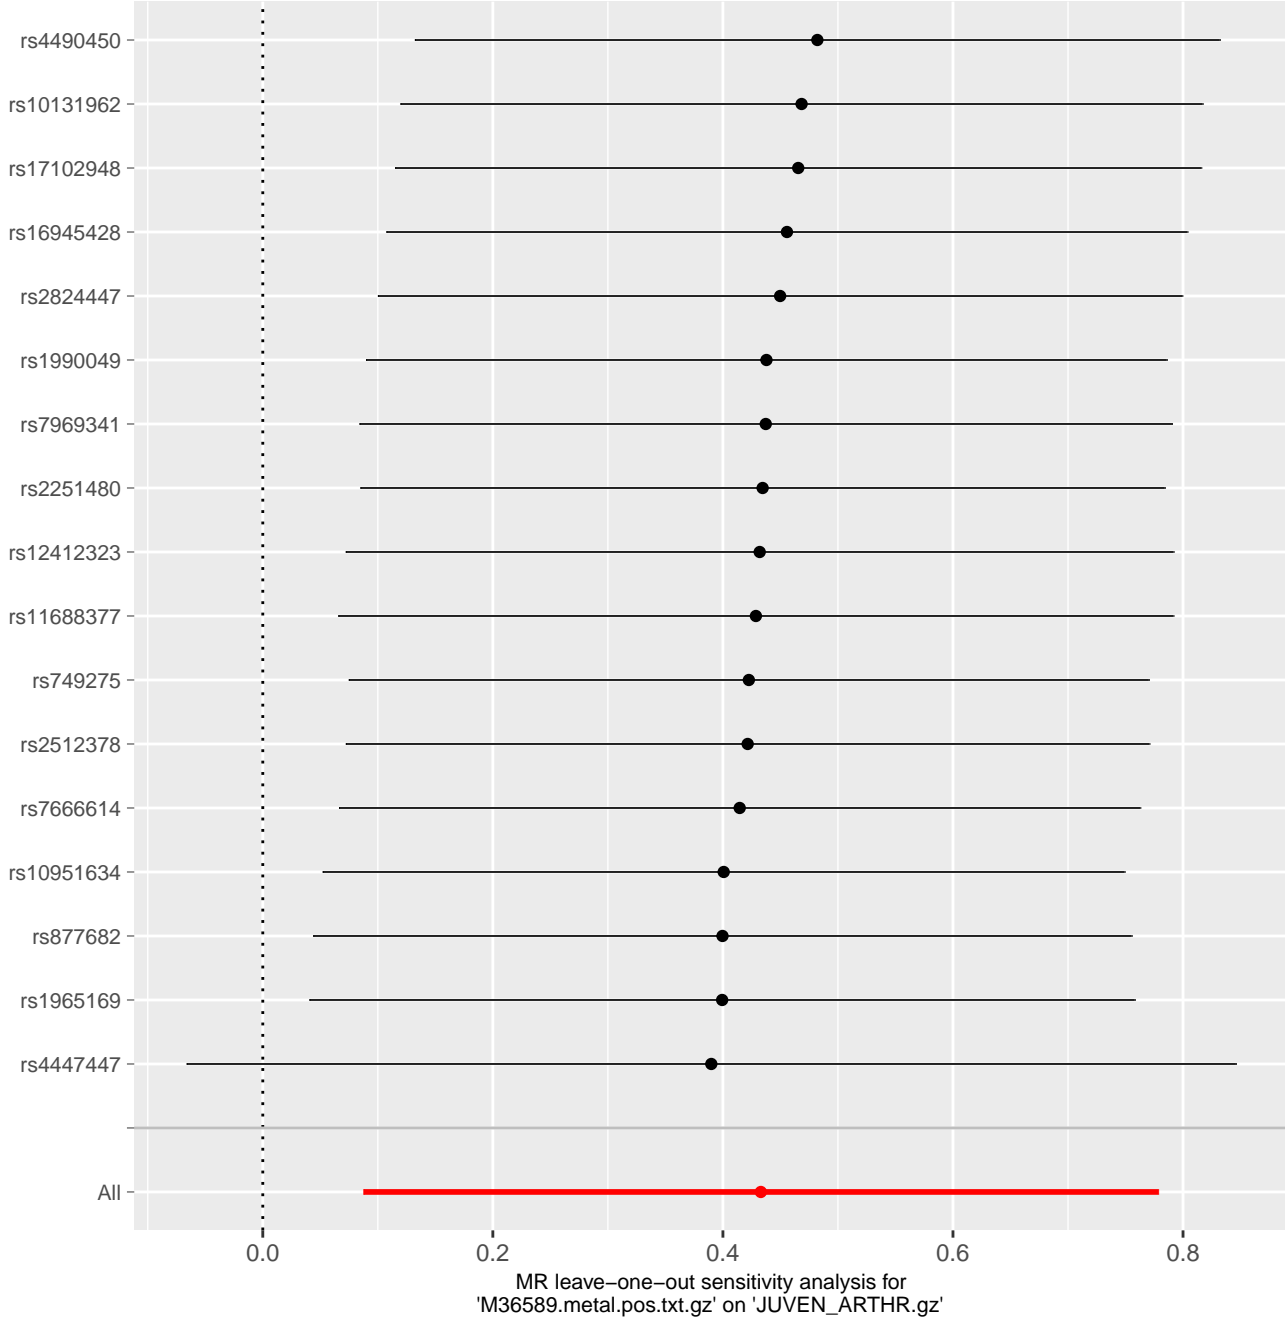

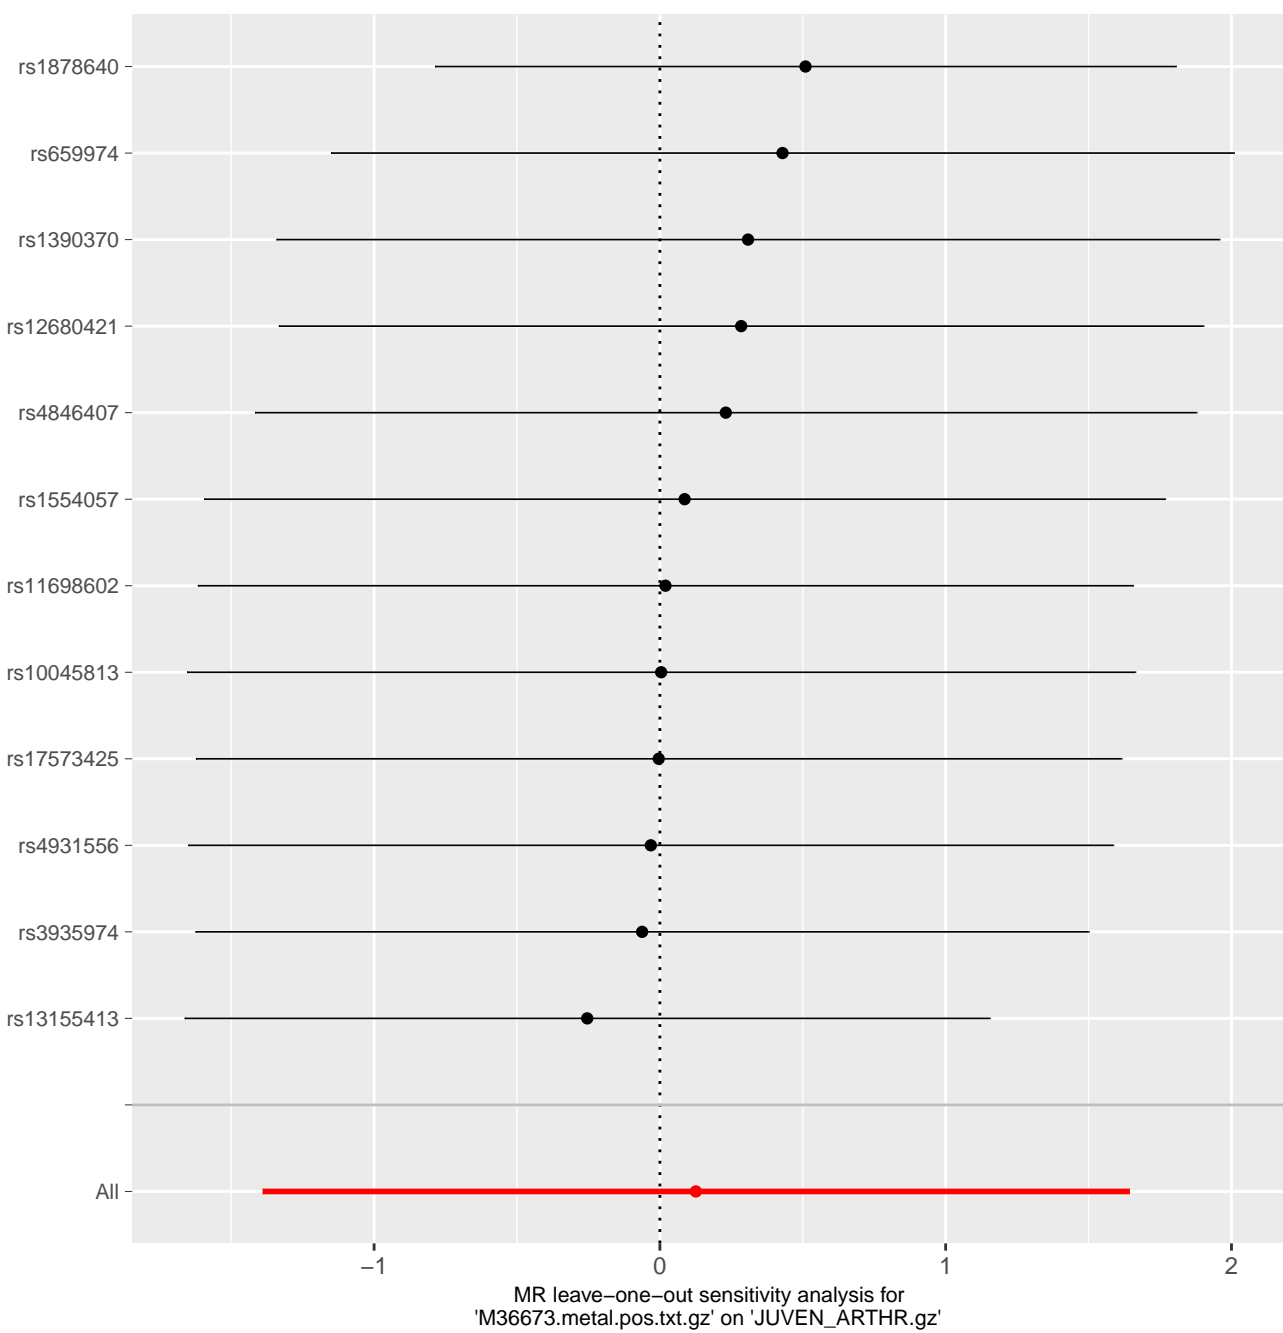



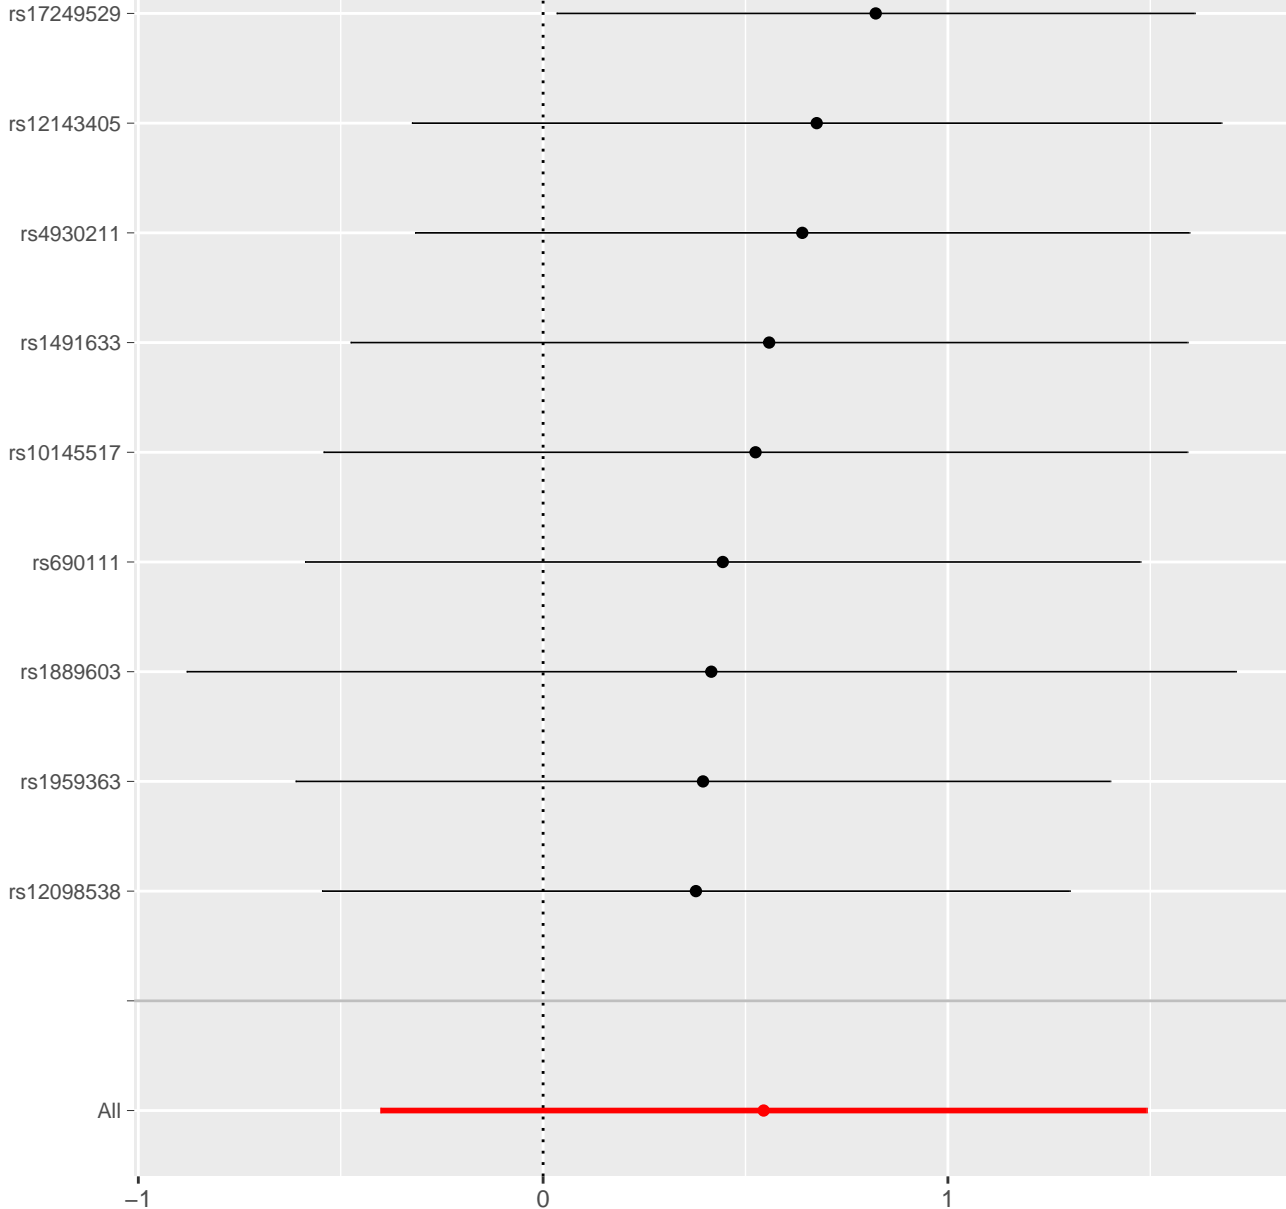

MR leave-one-out sensitivity analysis for 'M36738.metal.pos.txt.gz' on 'JUVEN\_ARTHR.gz'

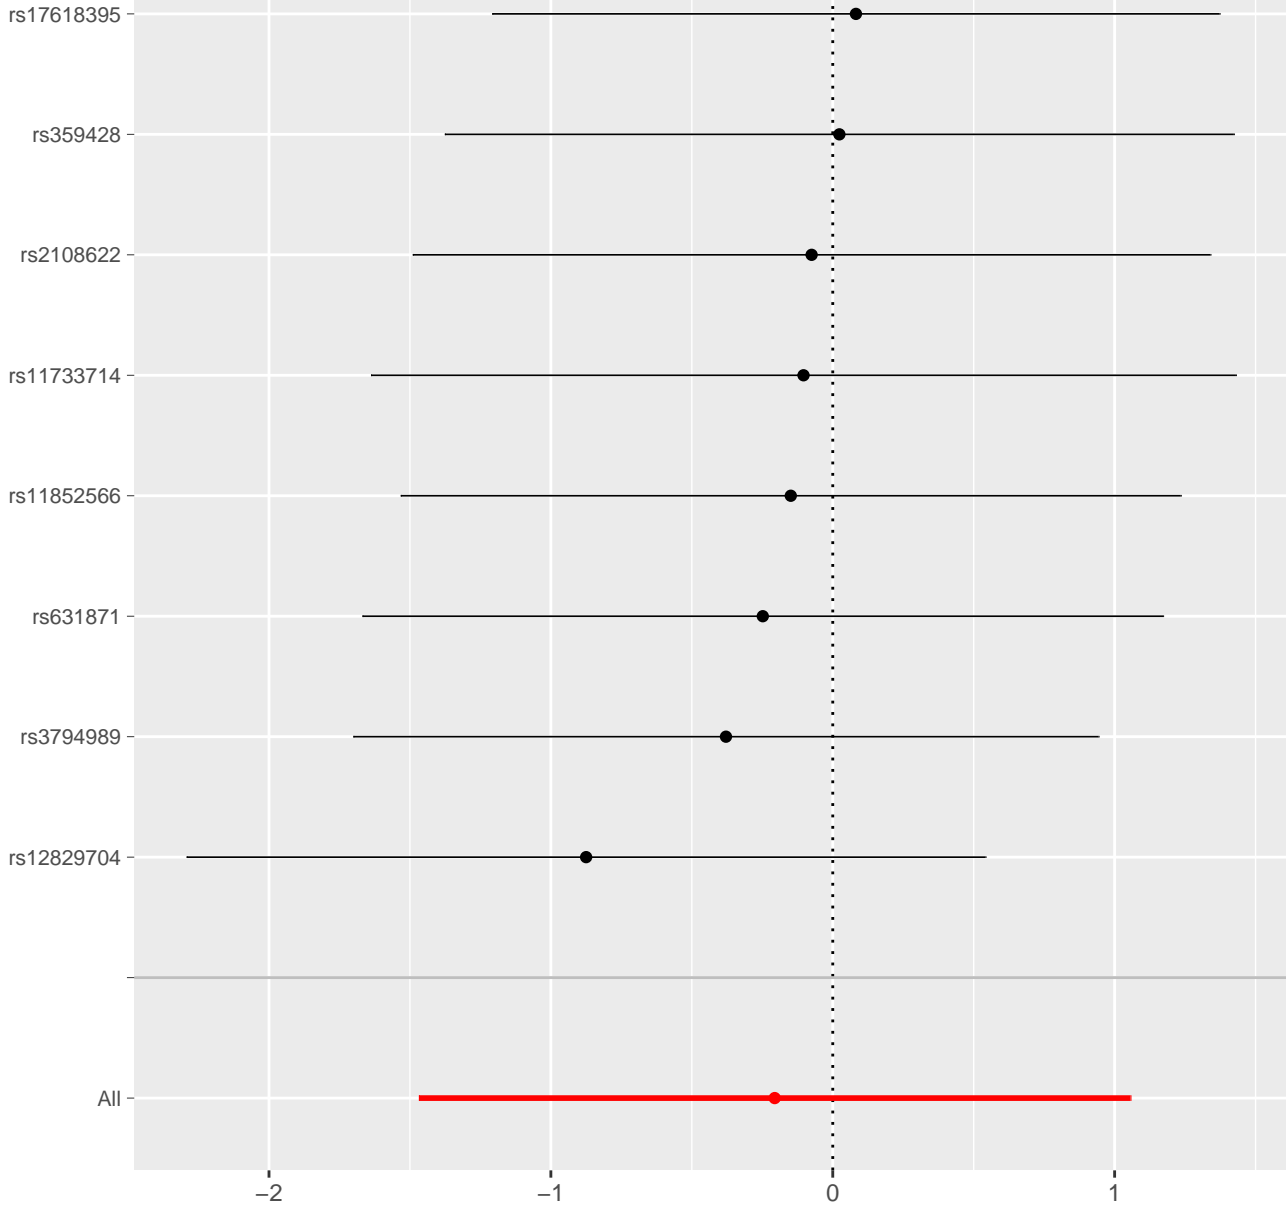

MR leave-one-out sensitivity analysis for 'M36754.metal.pos.txt.gz' on 'JUVEN\_ARTHR.gz'

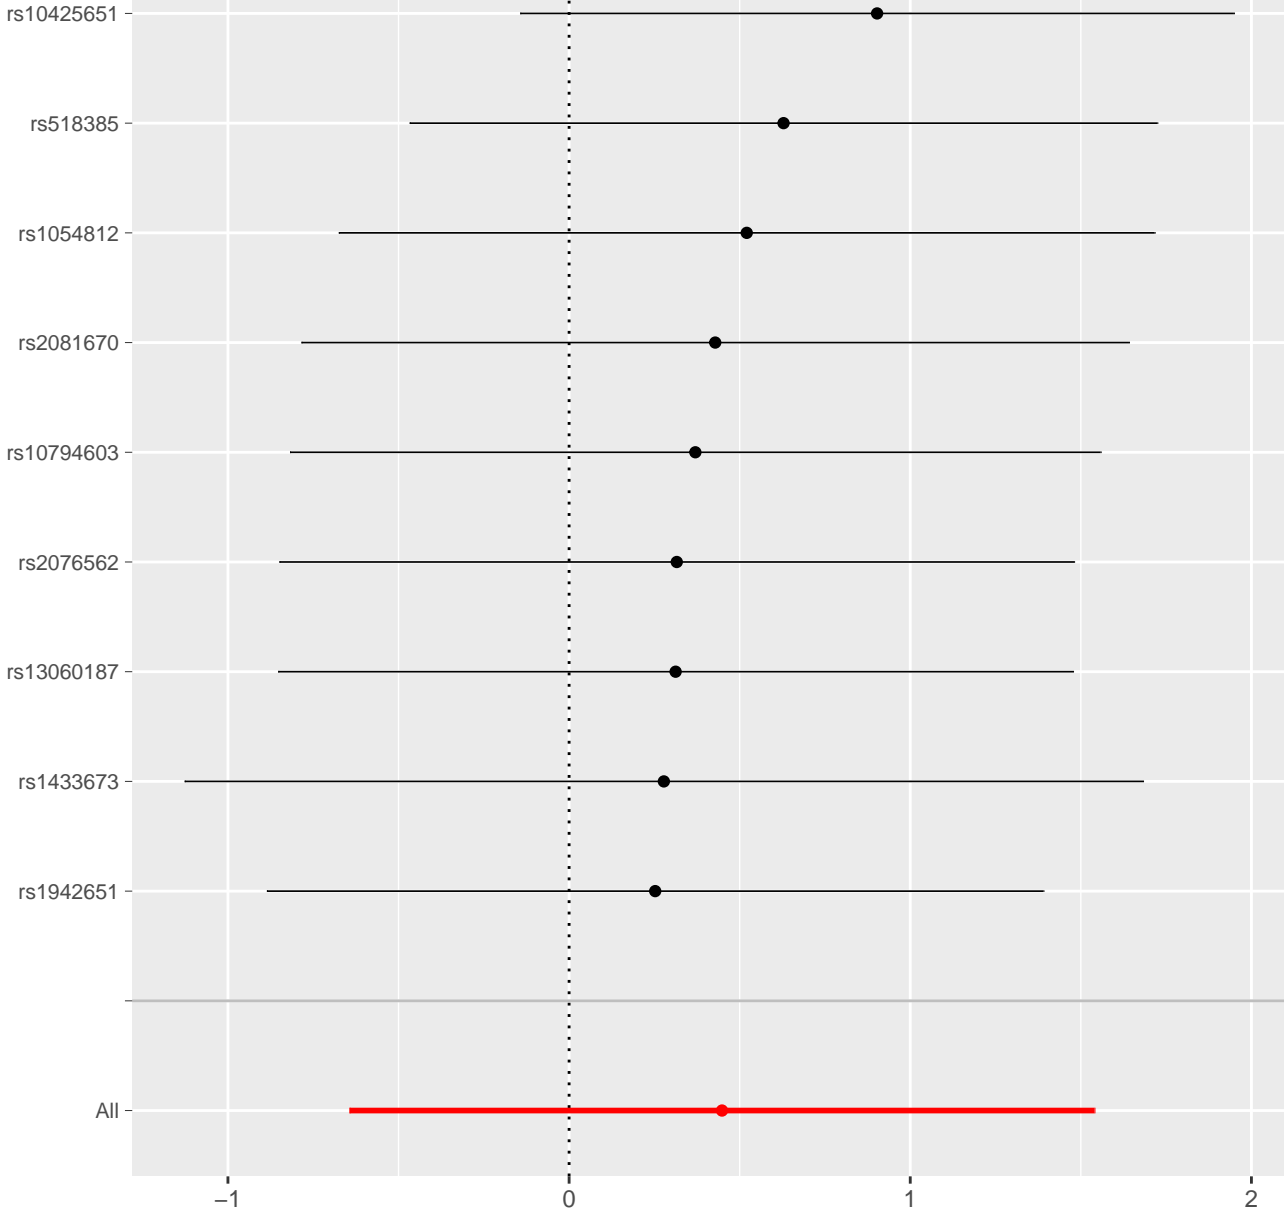

MR leave-one-out sensitivity analysis for 'M36756.metal.pos.txt.gz' on 'JUVEN\_ARTHR.gz'

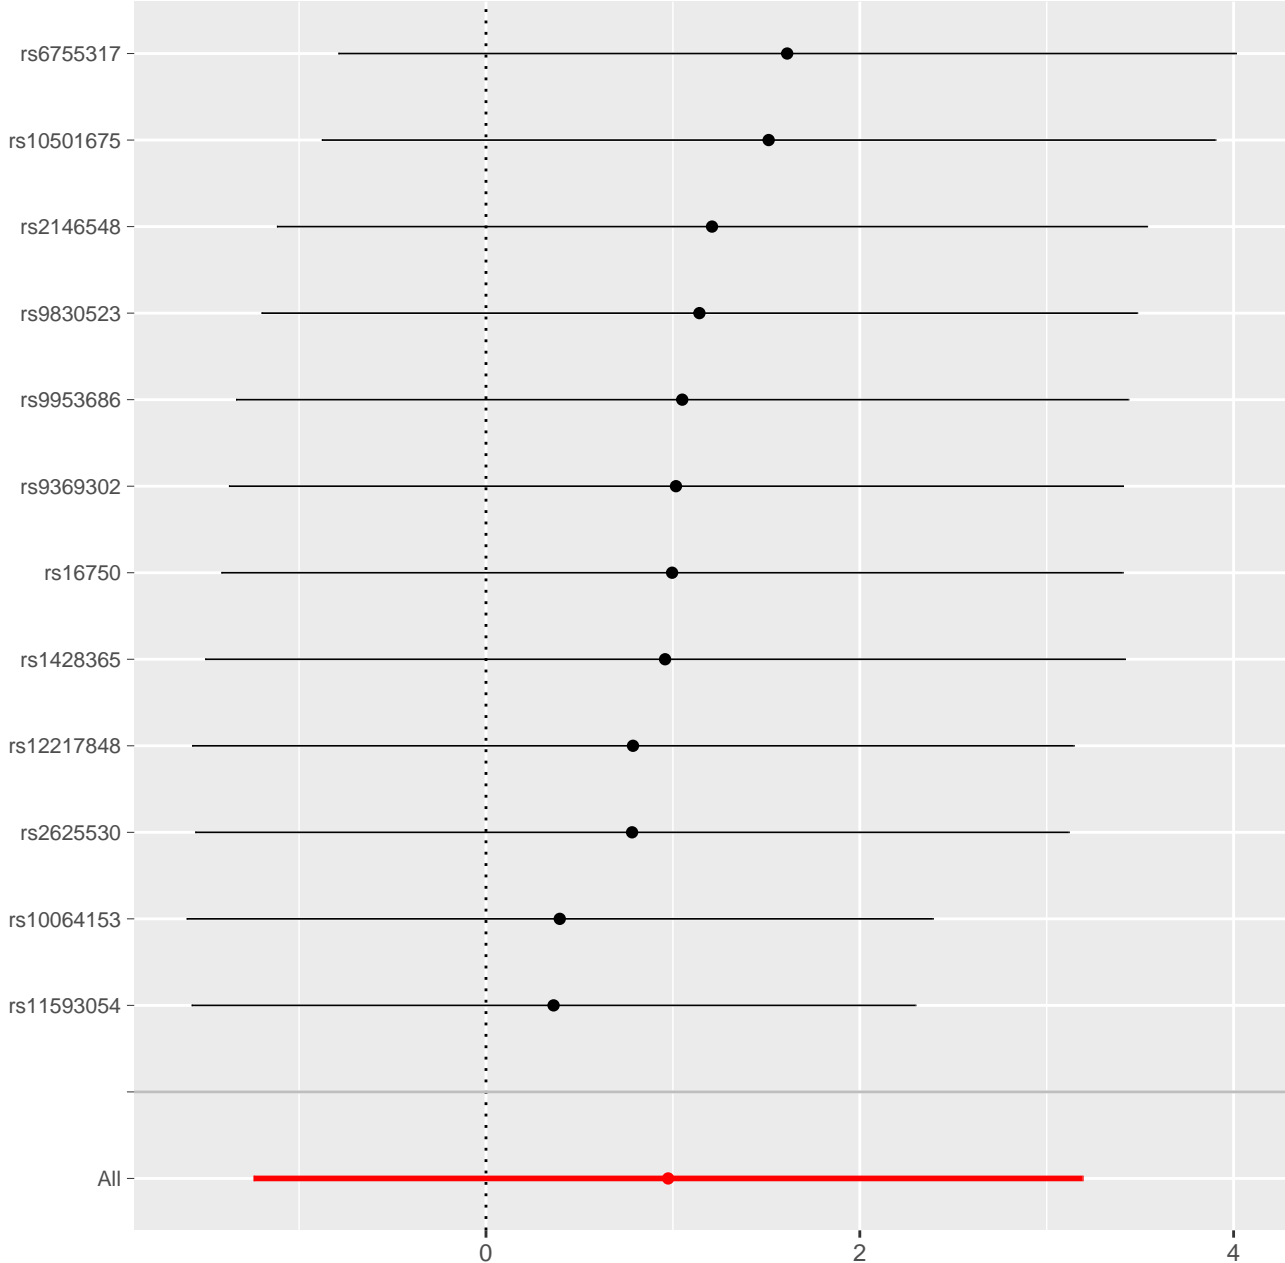

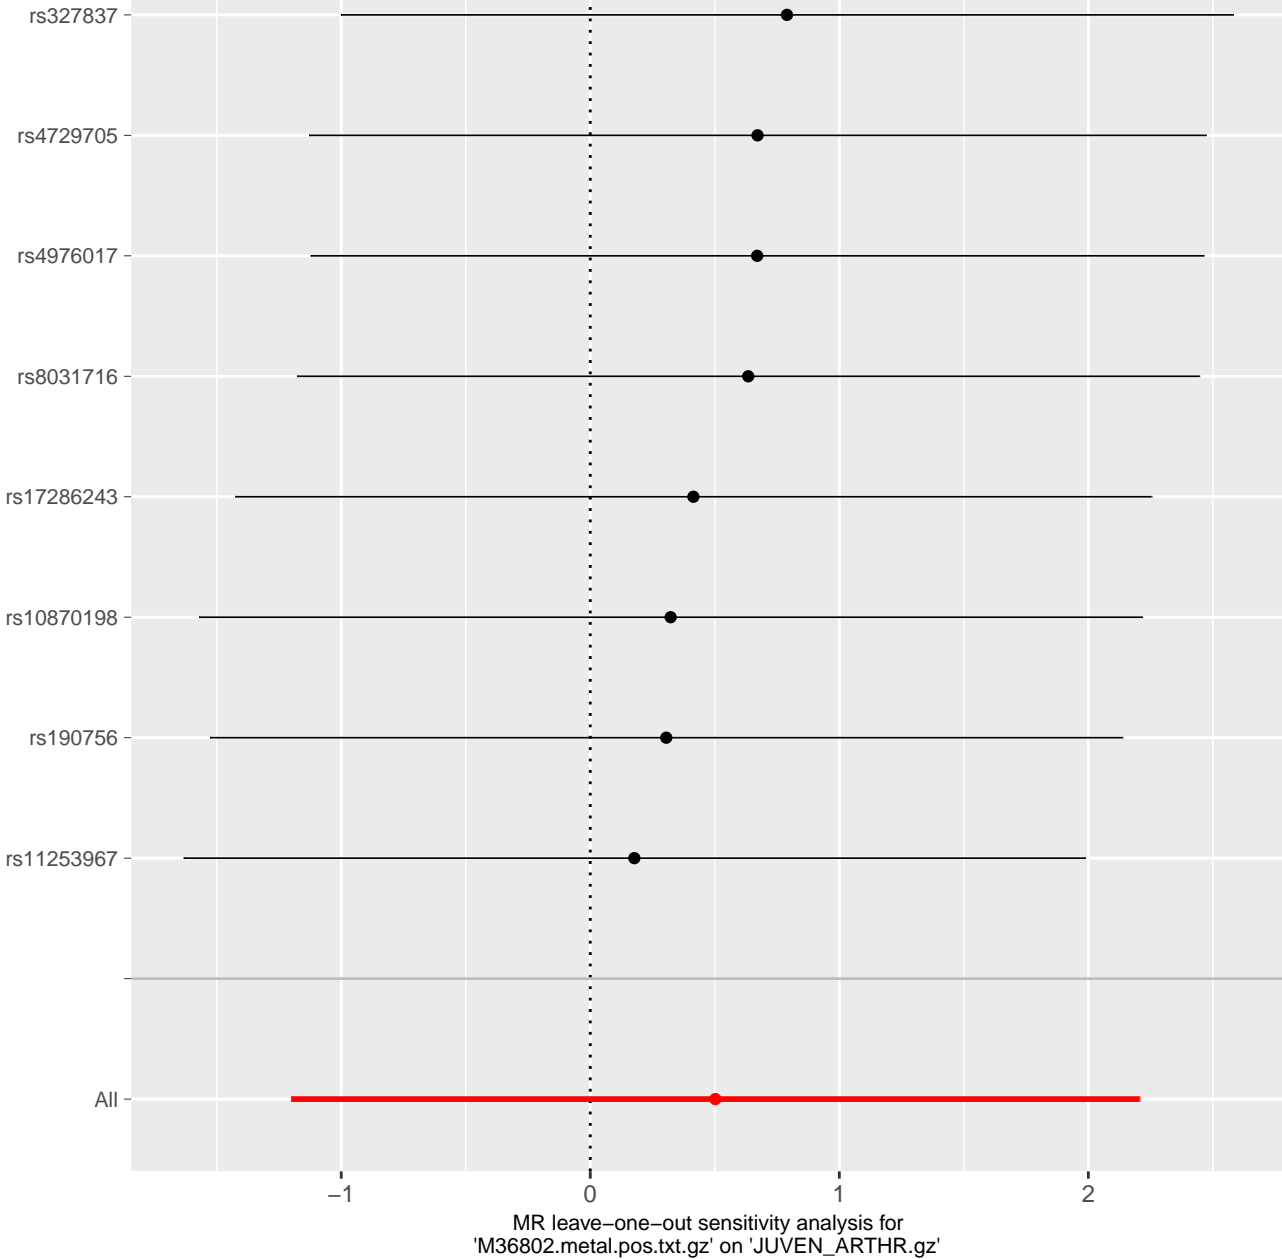

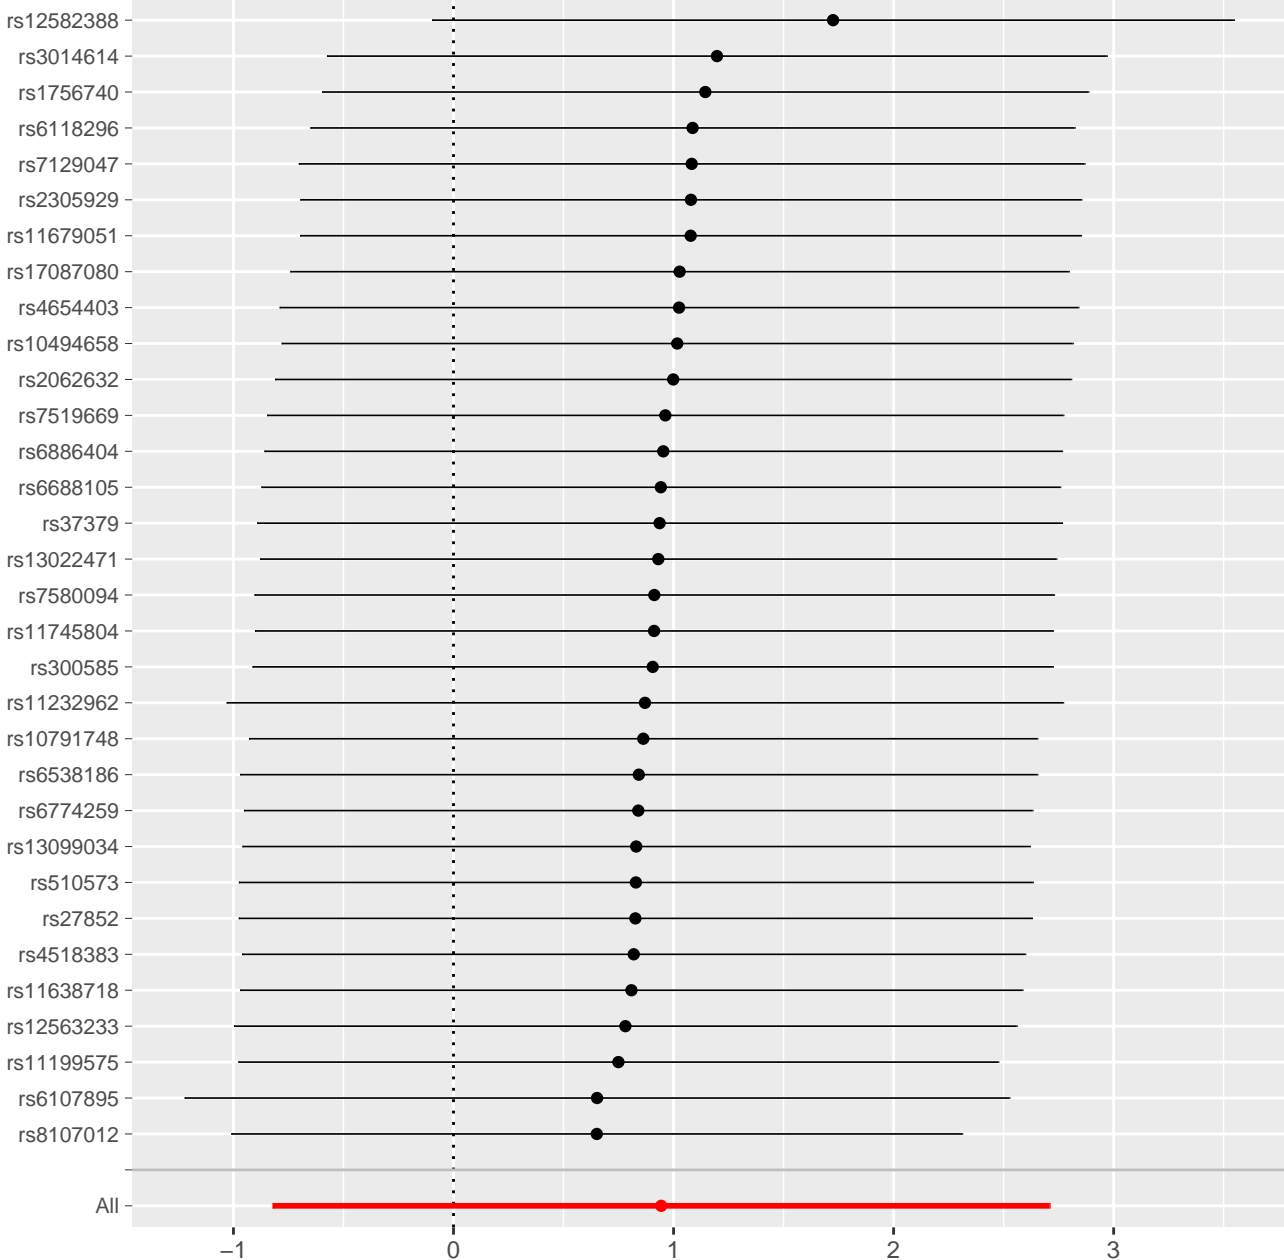

MR leave-one-out sensitivity analysis for 'M36808.metal.pos.txt.gz' on 'JUVEN\_ARTHR.gz'

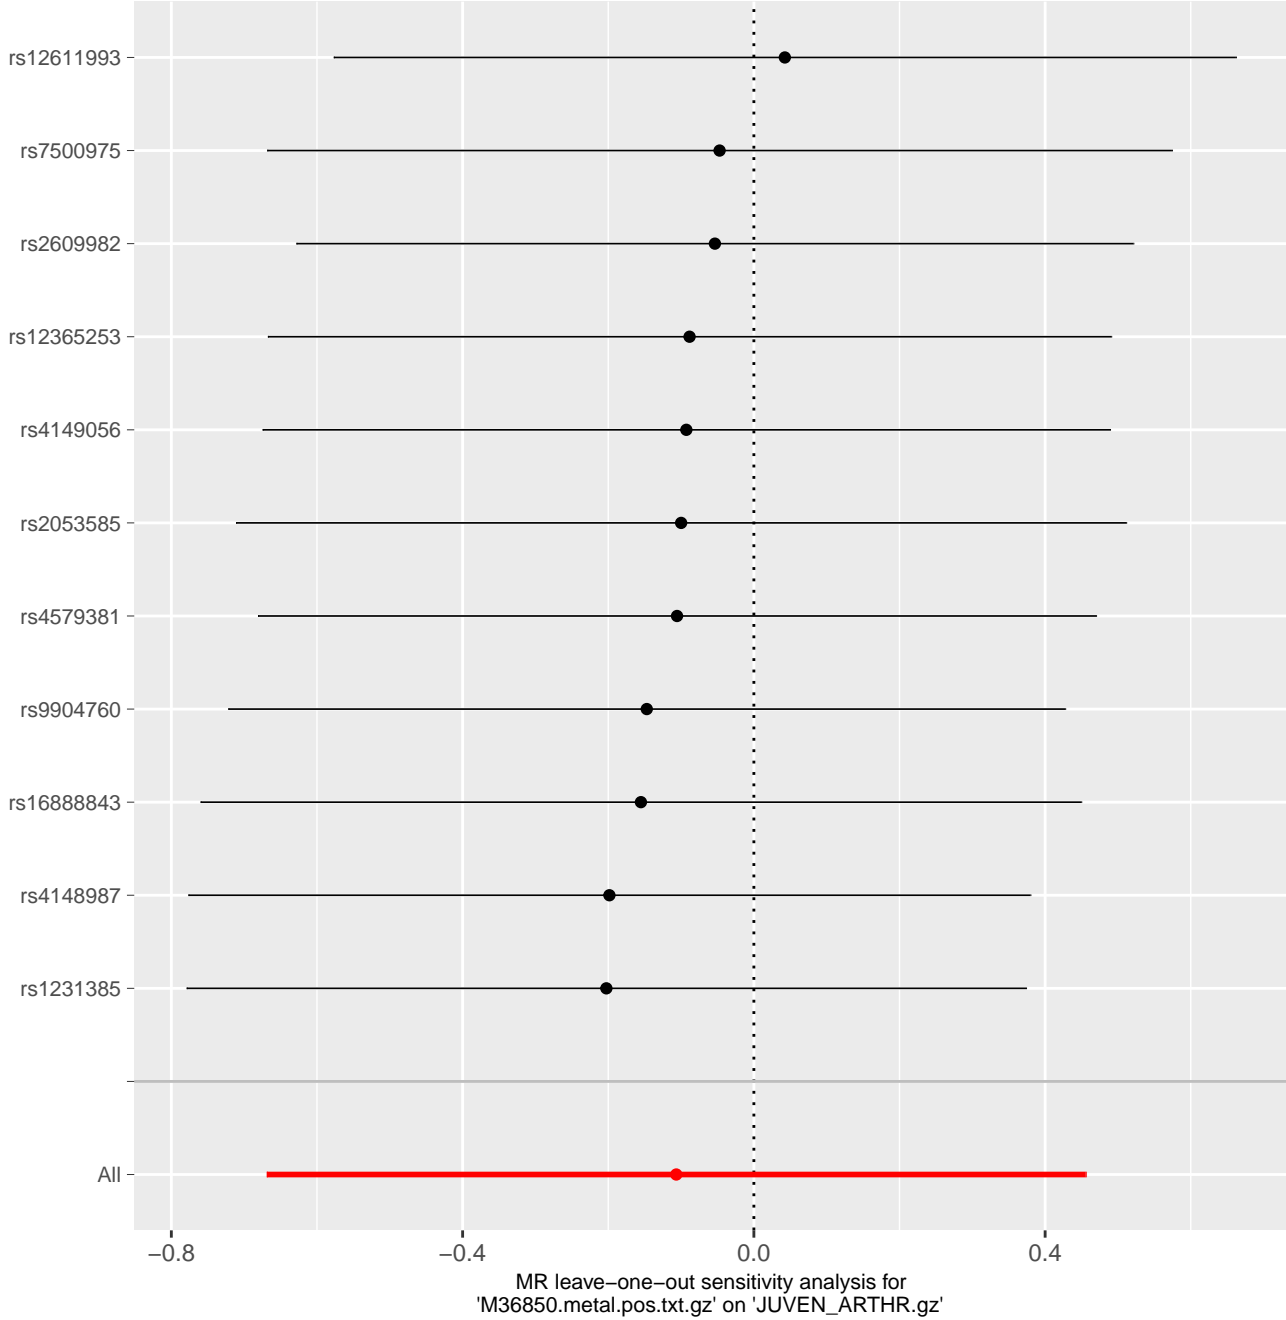

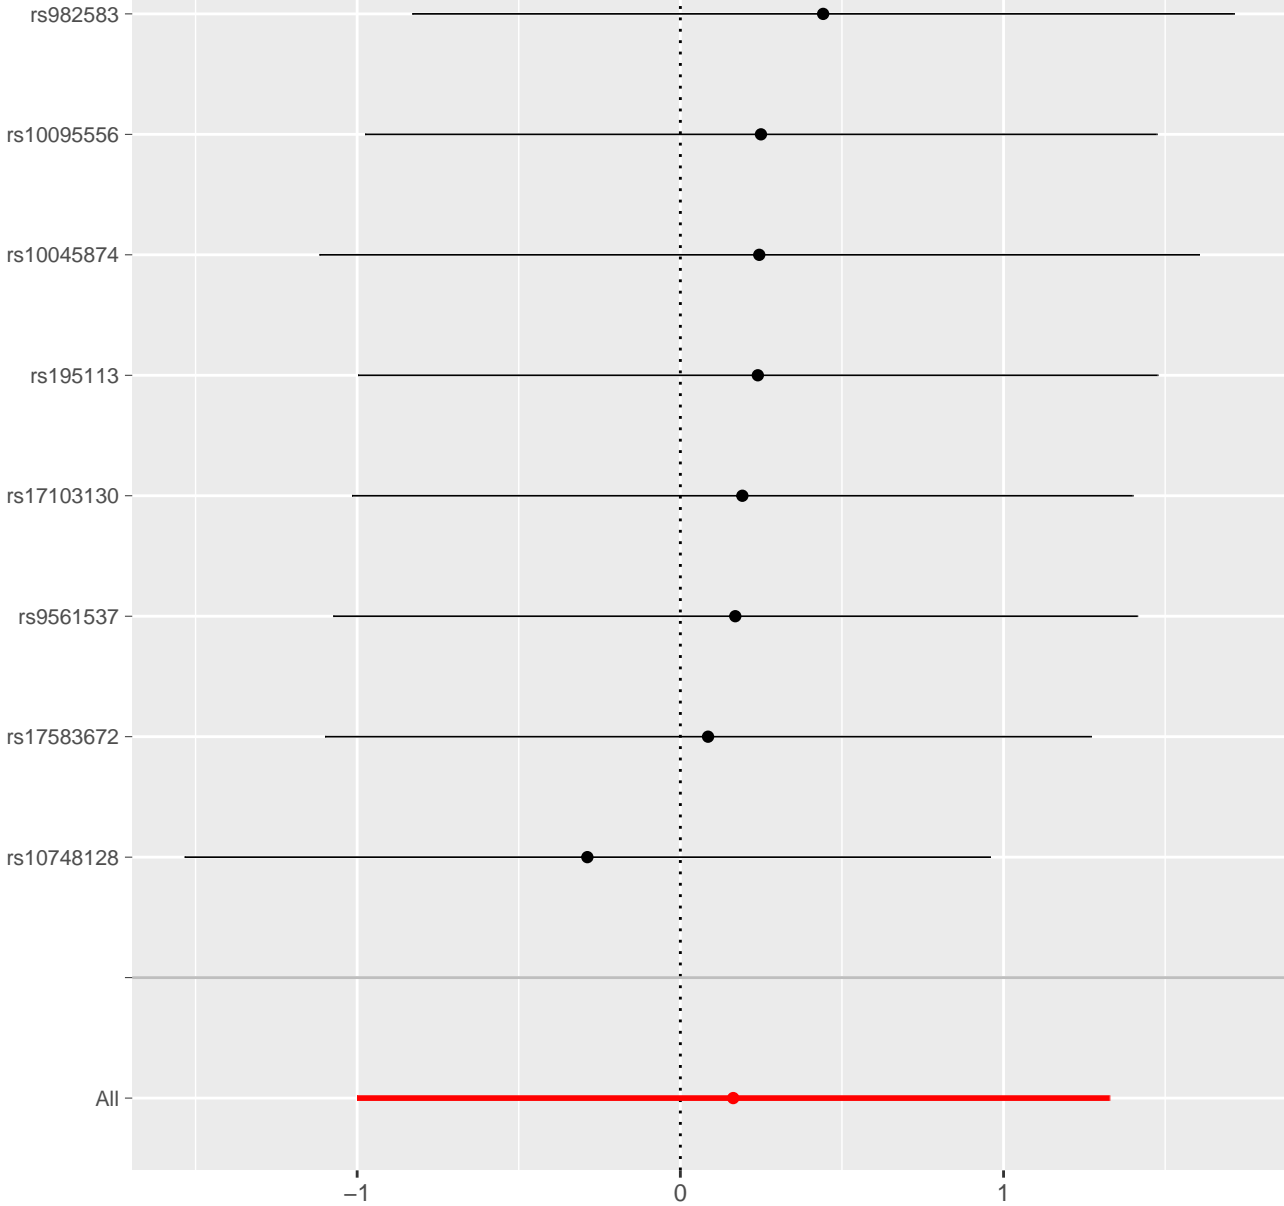

MR leave-one-out sensitivity analysis for 'M37004.metal.pos.txt.gz' on 'JUVEN\_ARTHR.gz'



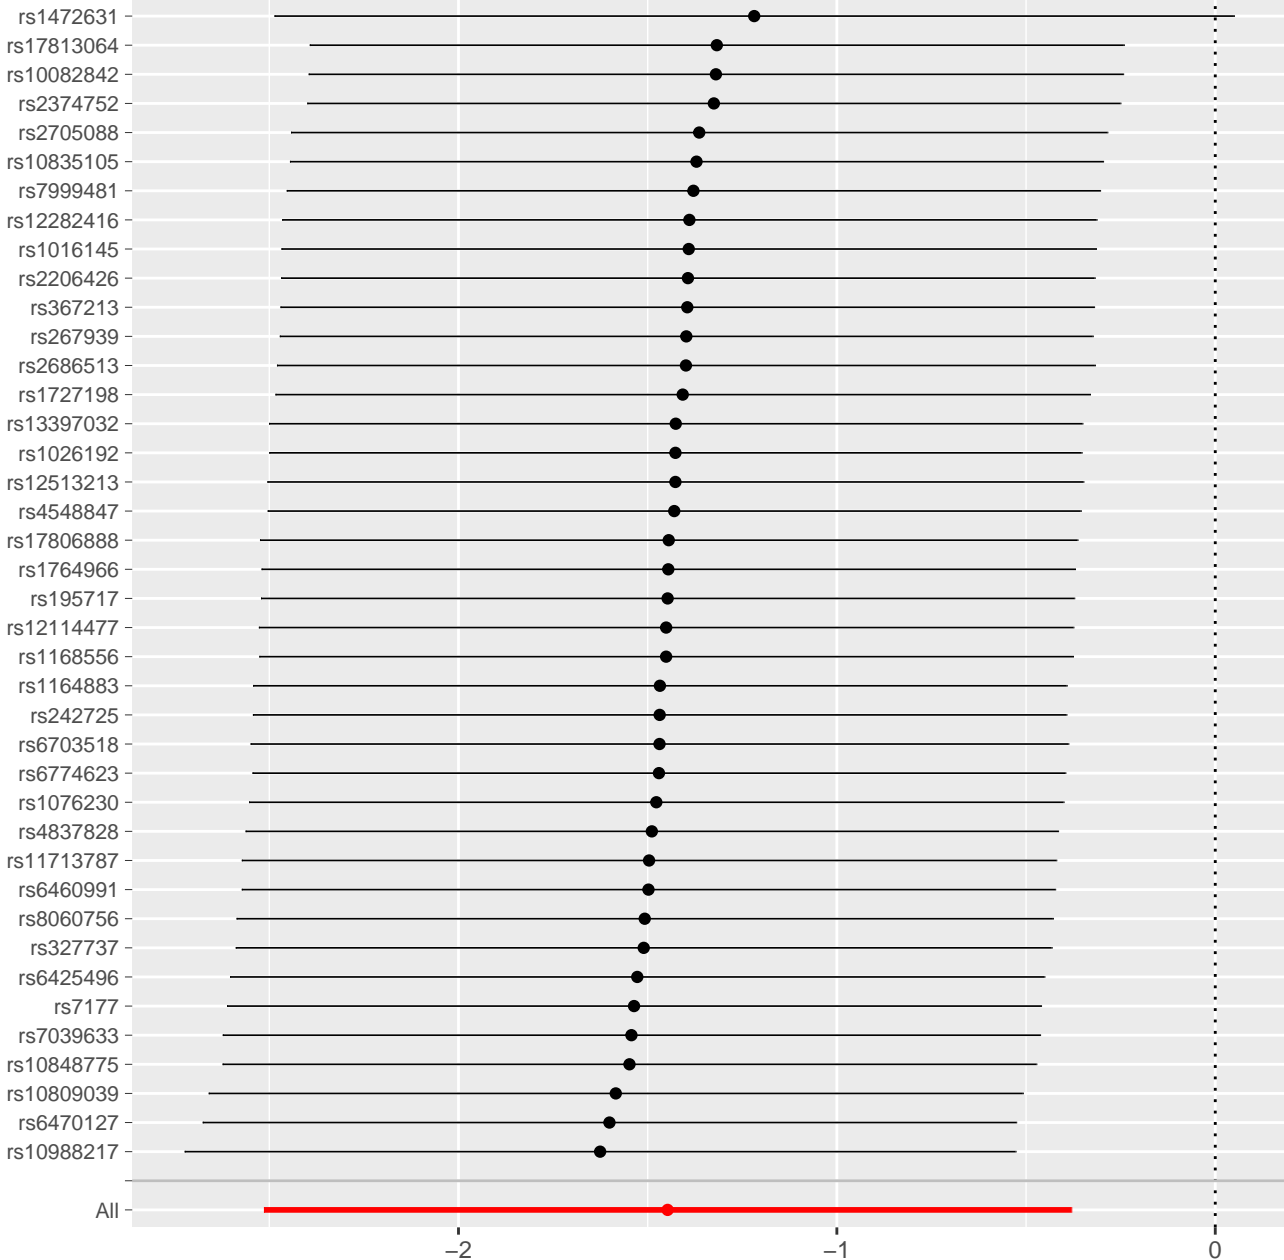

MR leave-one-out sensitivity analysis for 'M37058.metal.pos.txt.gz' on 'JUVEN\_ARTHR.gz'

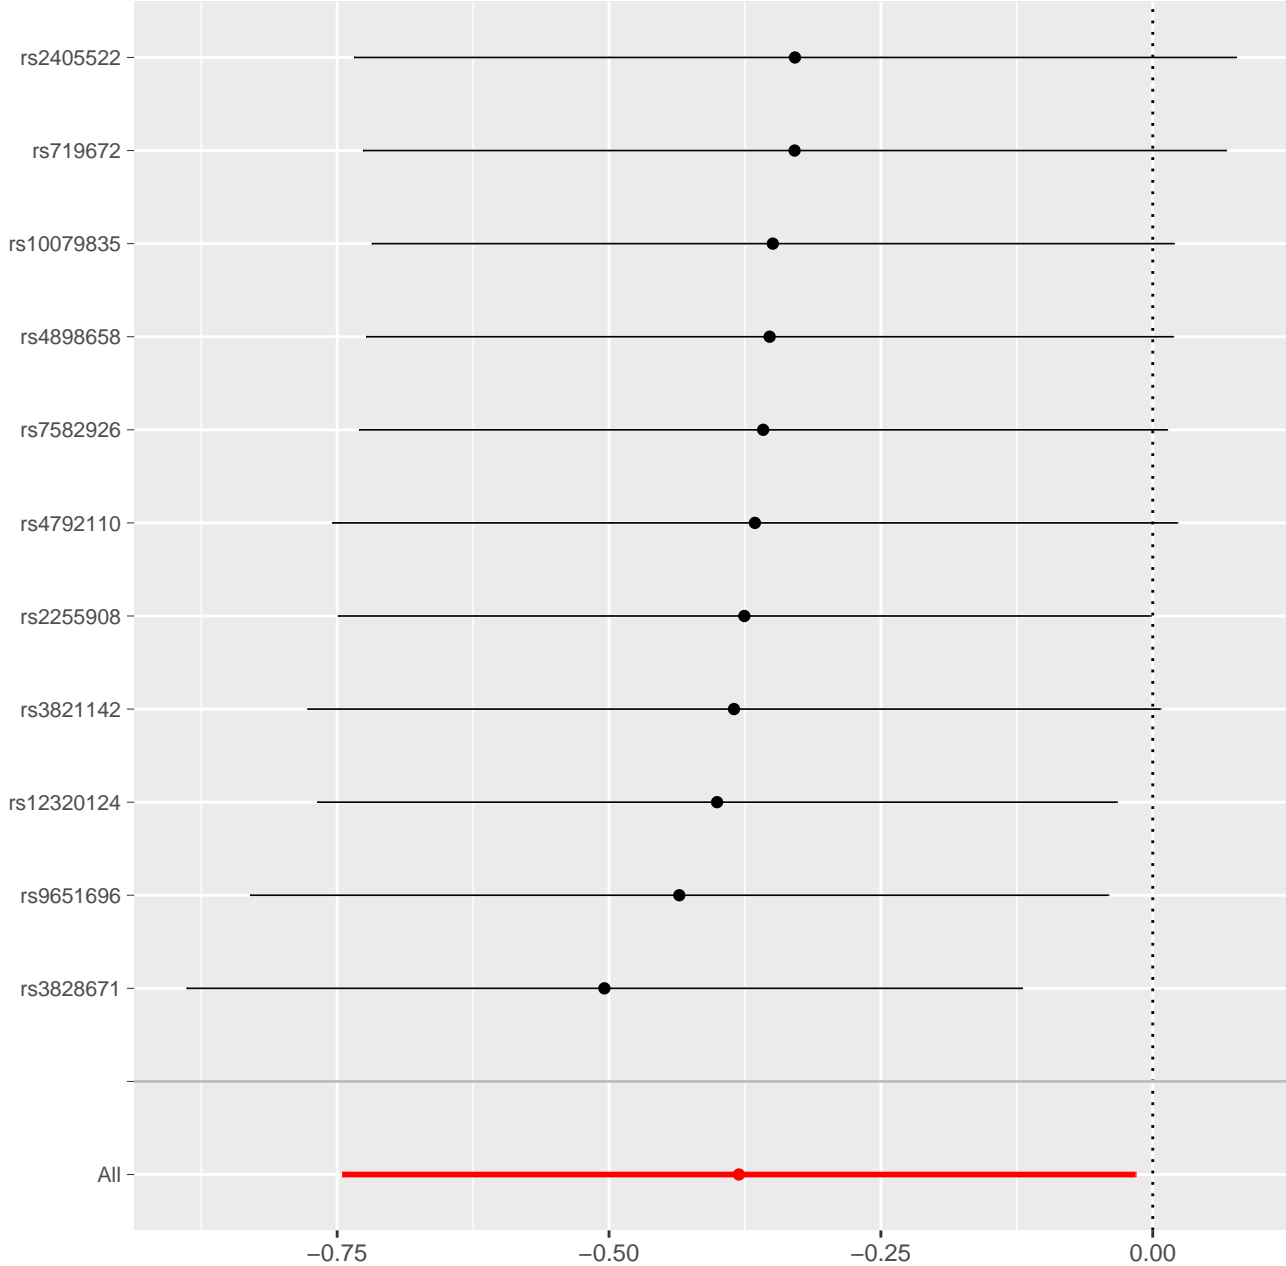

MR leave-one-out sensitivity analysis for 'M37097.metal.pos.txt.gz' on 'JUVEN\_ARTHR.gz'

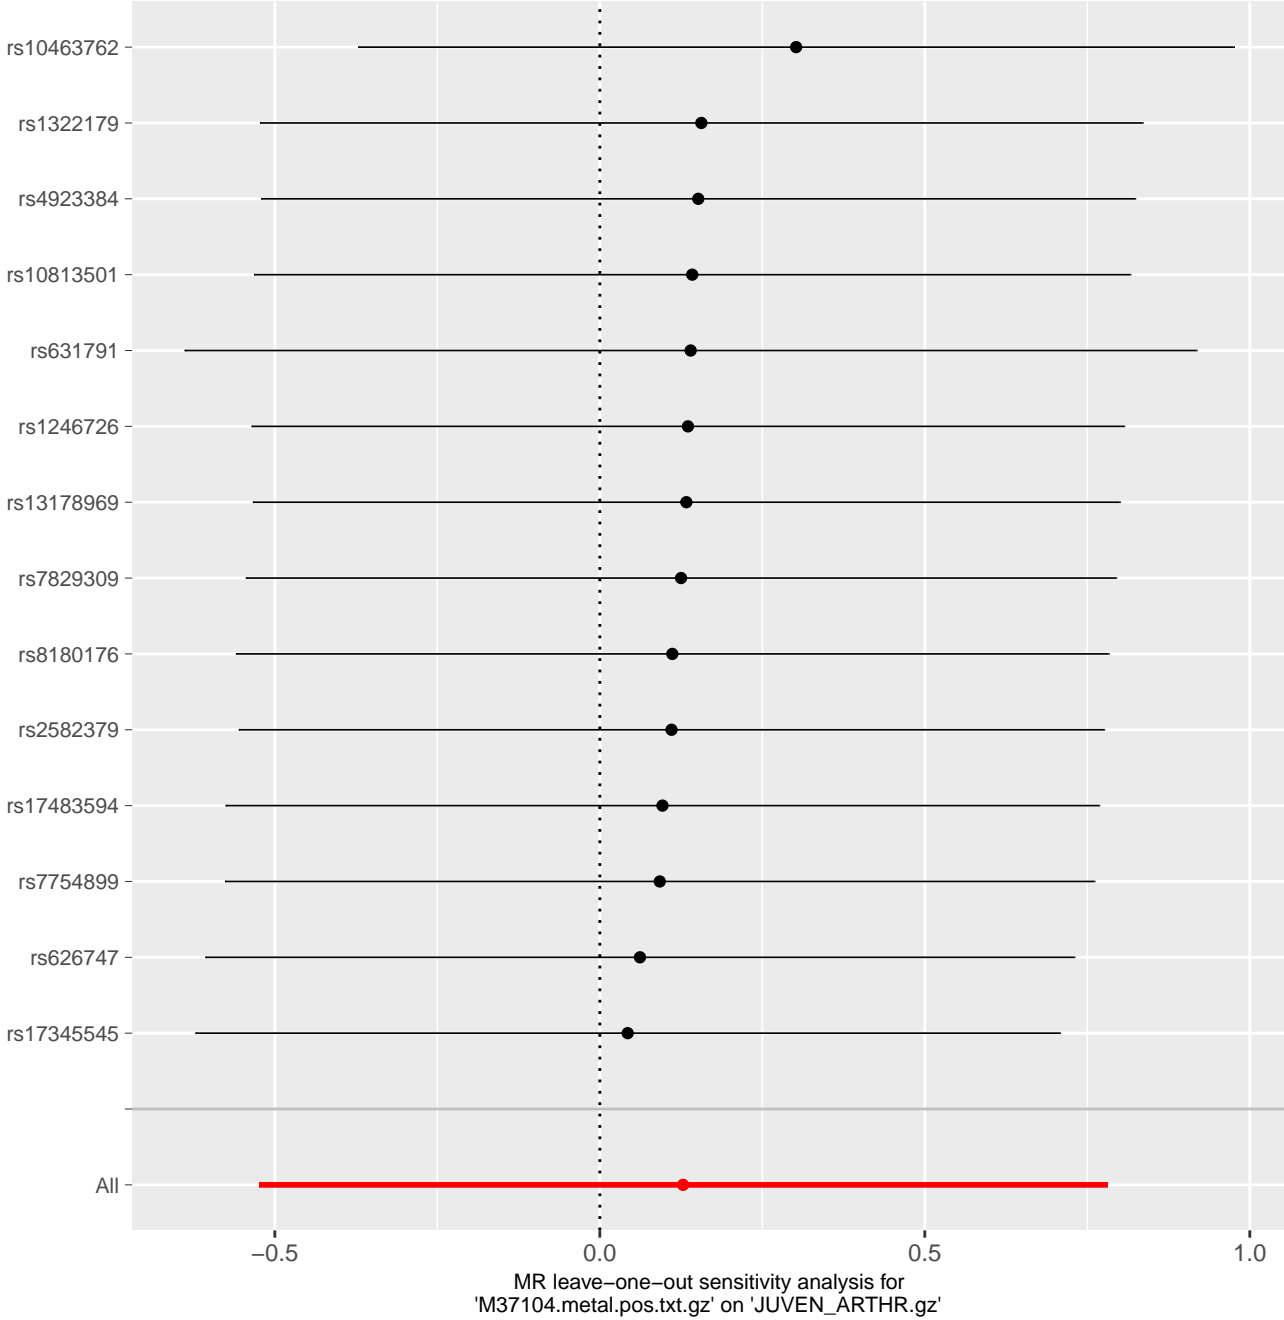

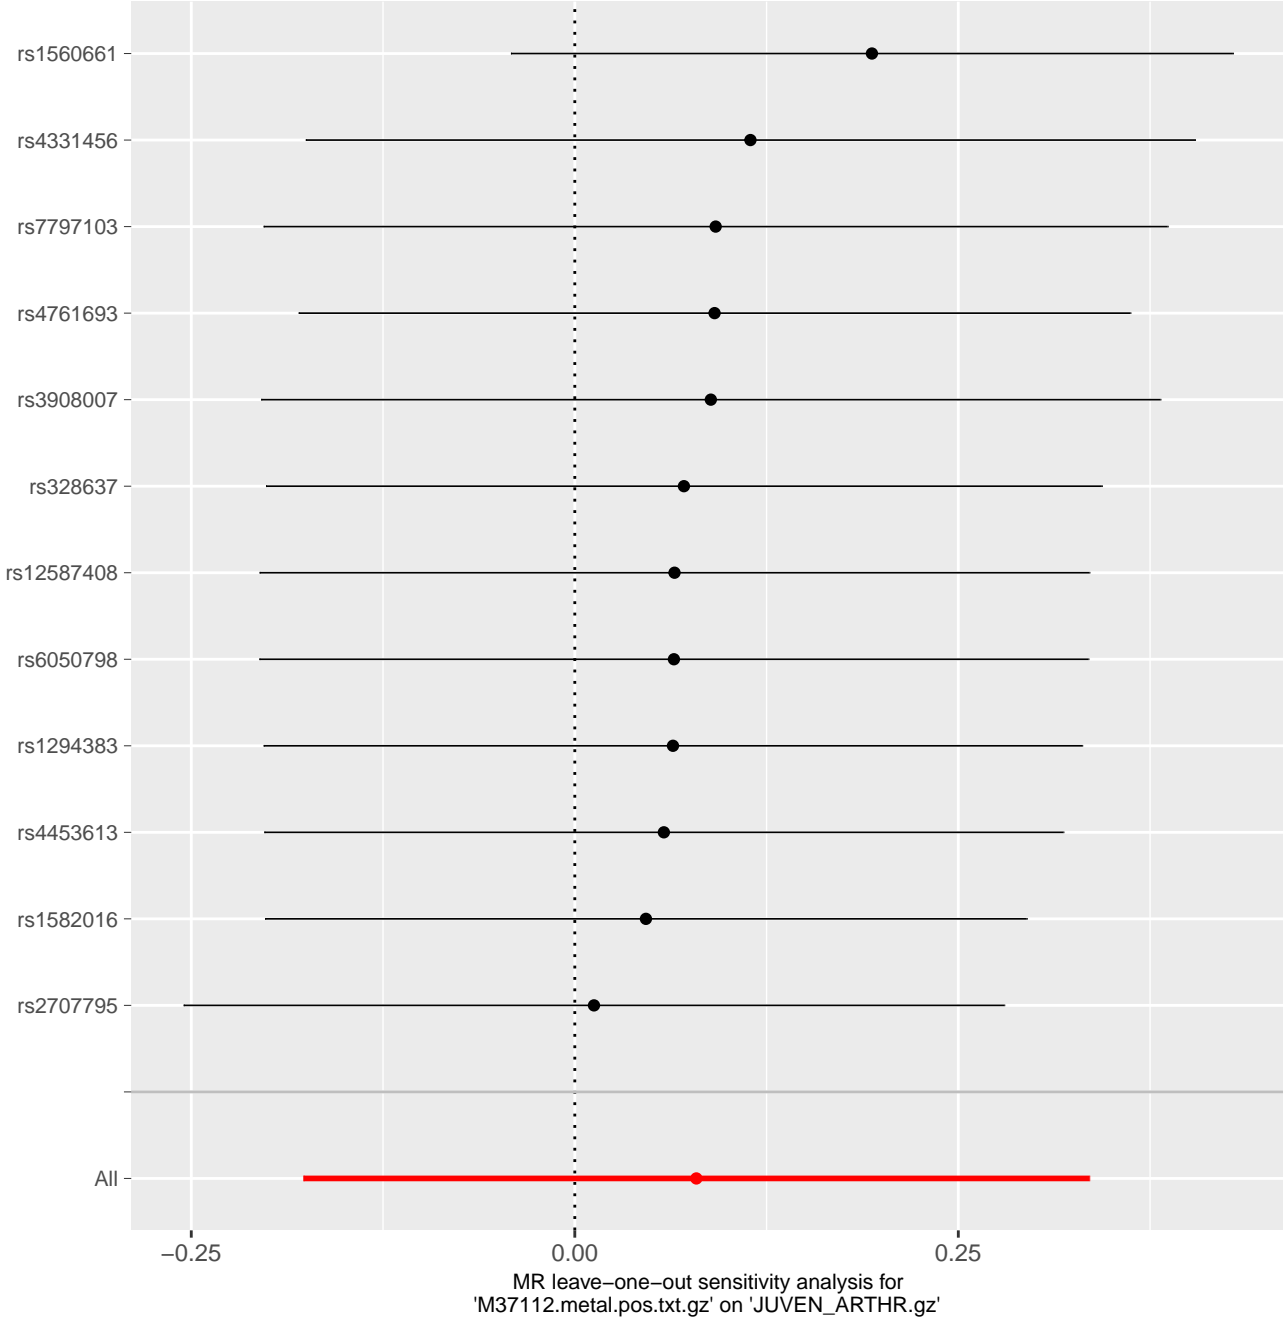

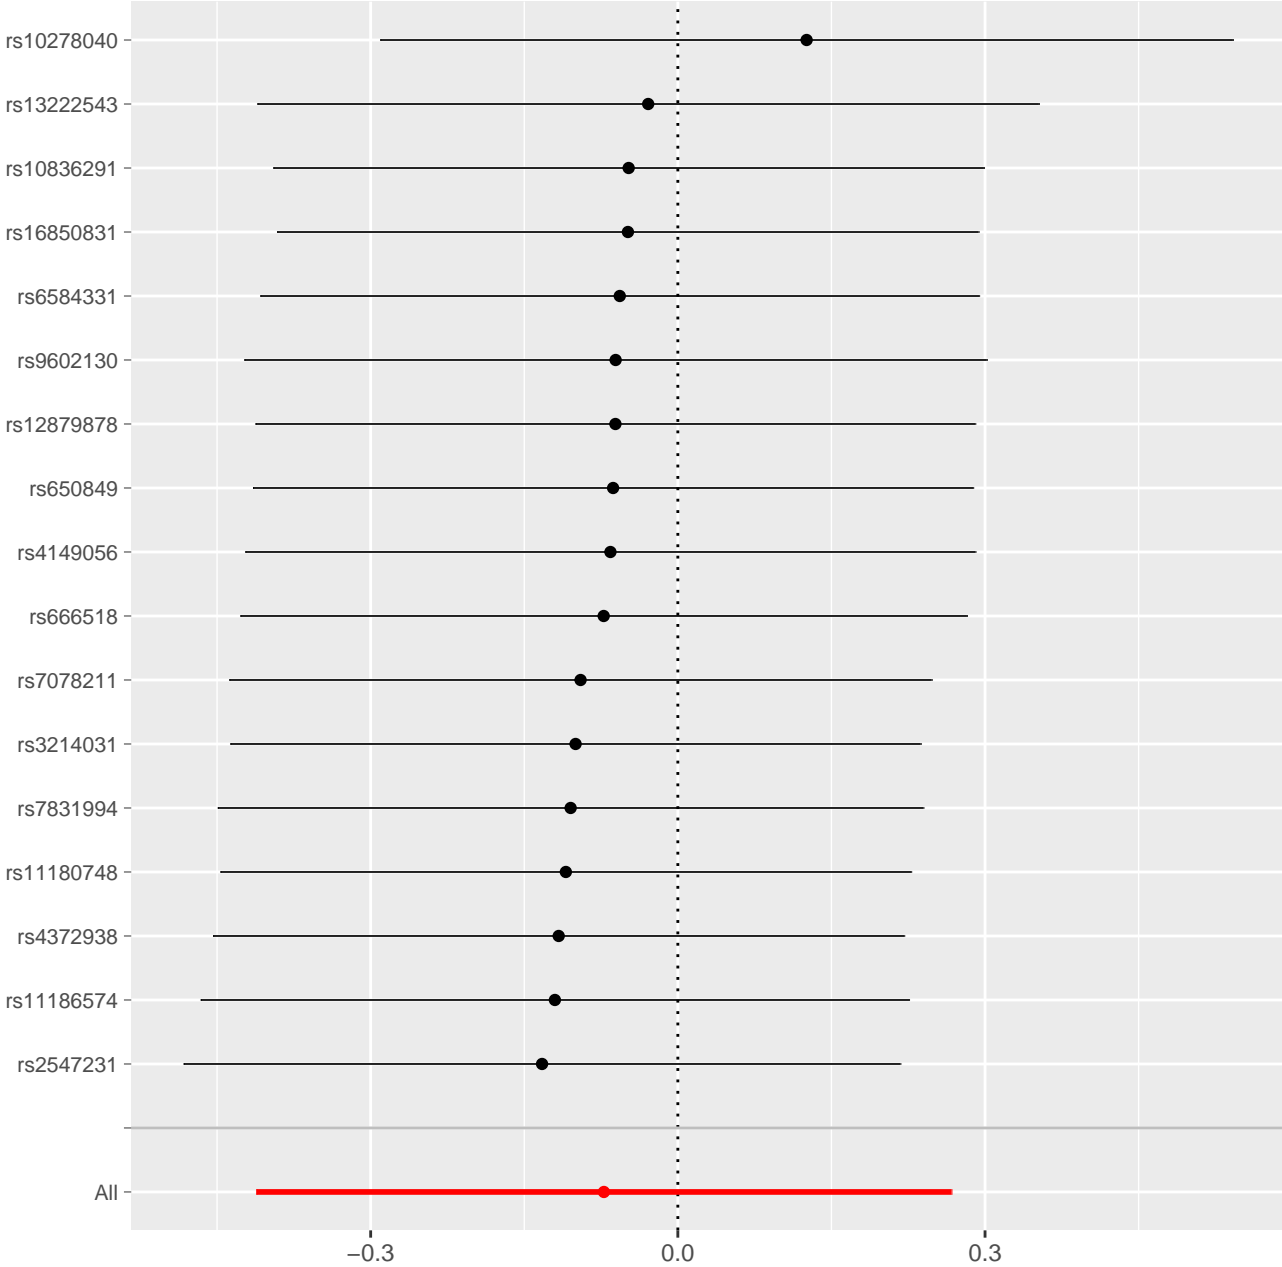

MR leave-one-out sensitivity analysis for 'M37190.metal.pos.txt.gz' on 'JUVEN\_ARTHR.gz'

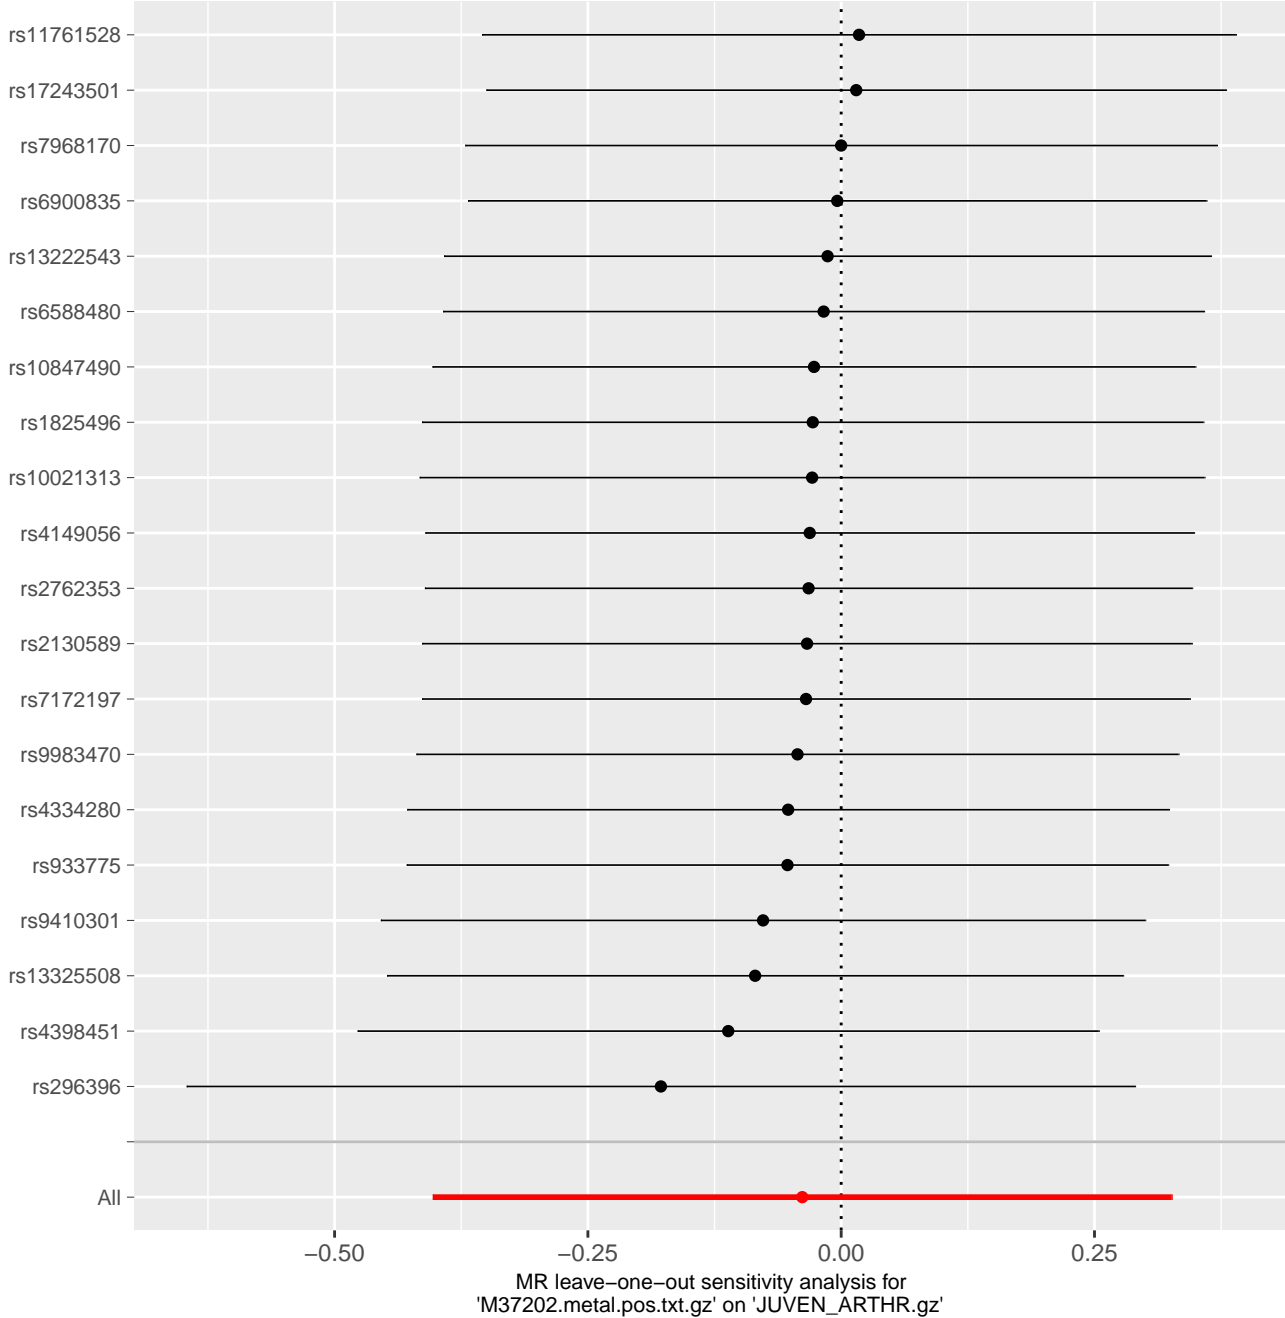

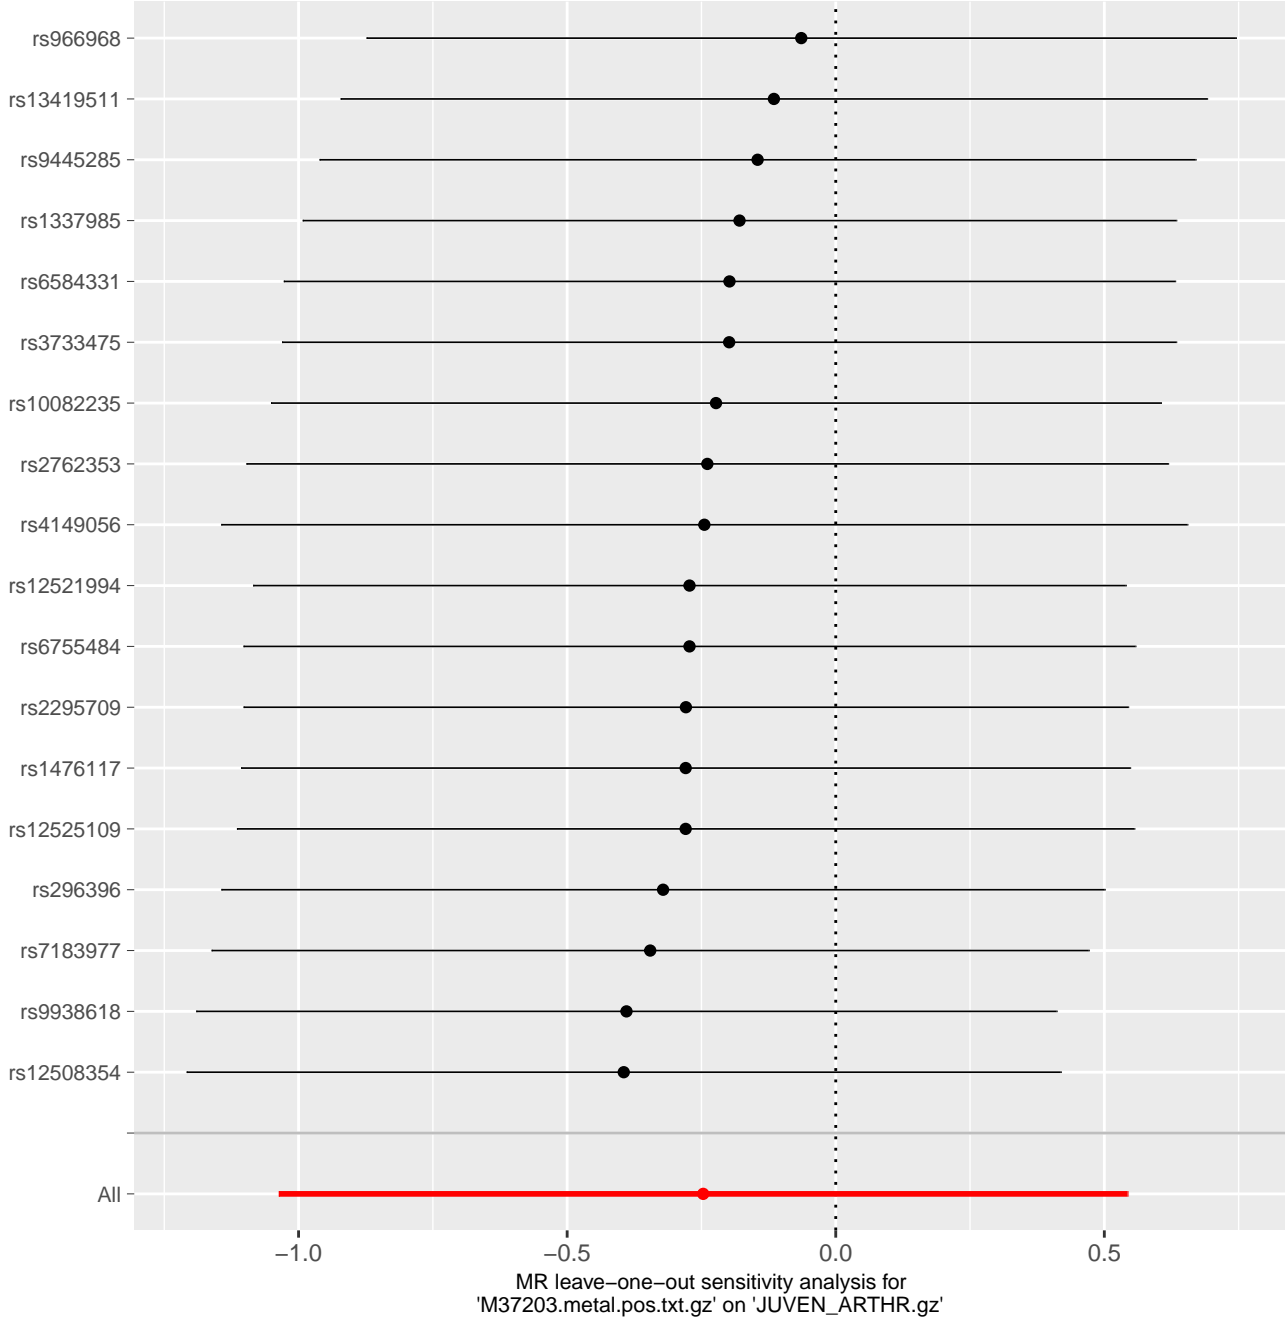

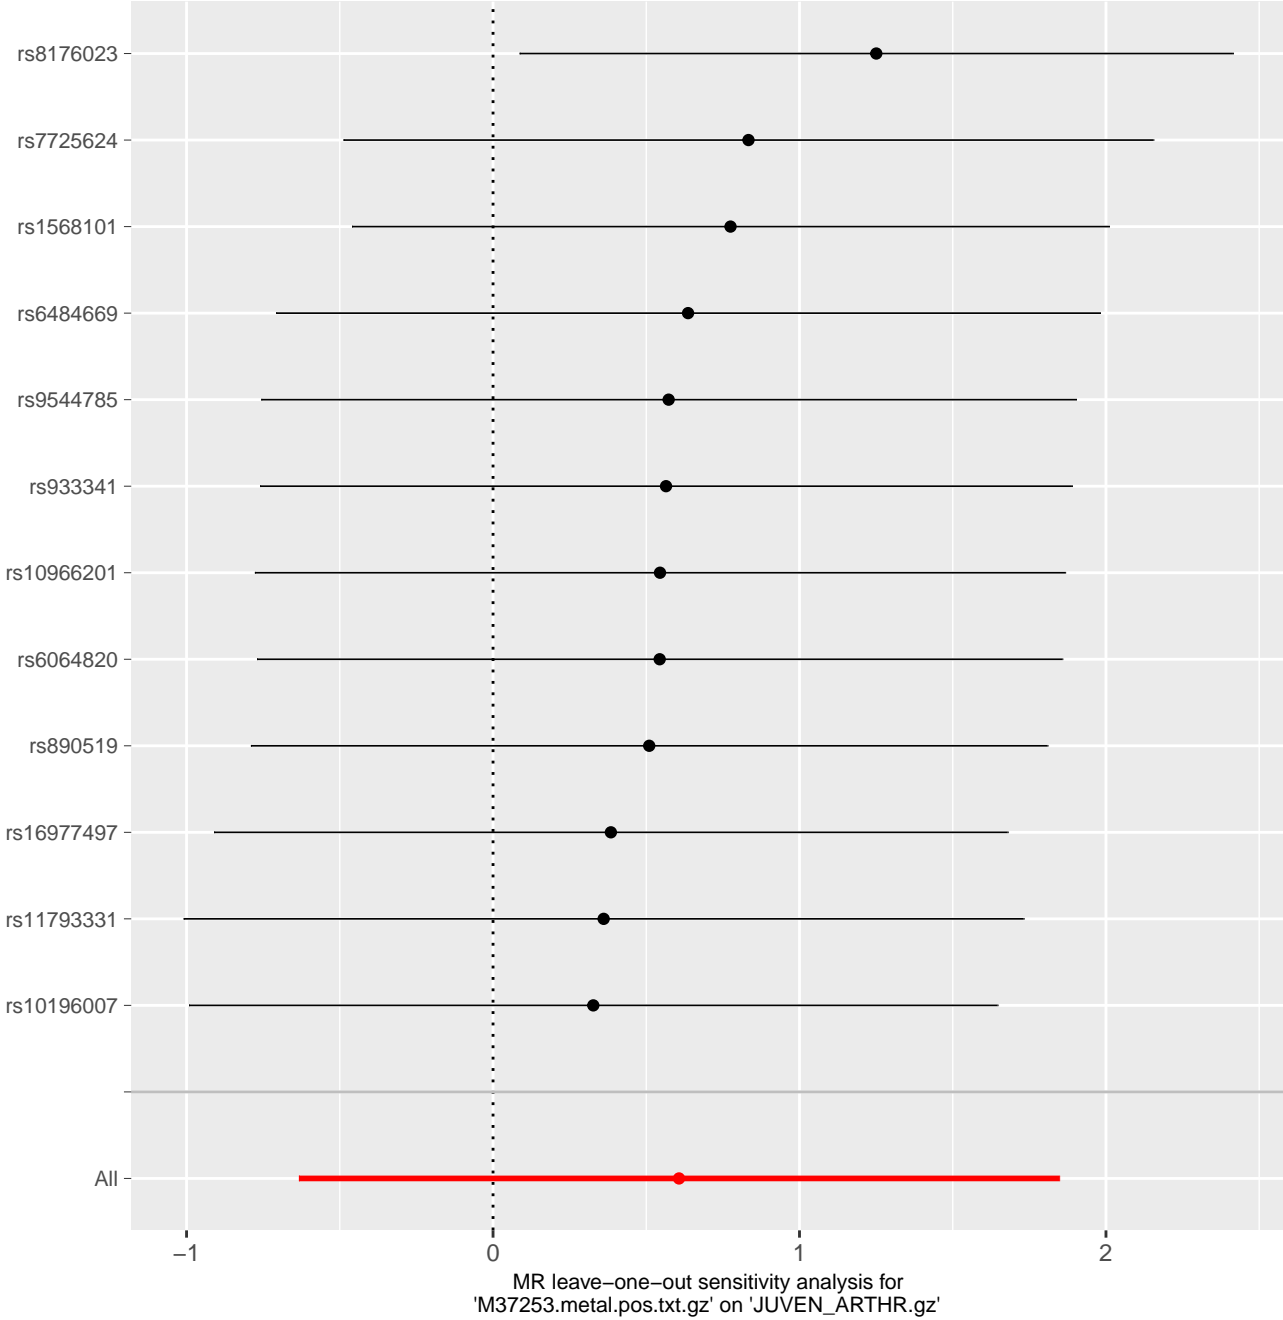



rs6082720

rs12727717

rs4823691

All

-2

0

2

MR leave-one-out sensitivity analysis for  
'M37459.metal.pos.txt.gz' on 'JUVEN\_ARTHR.gz'

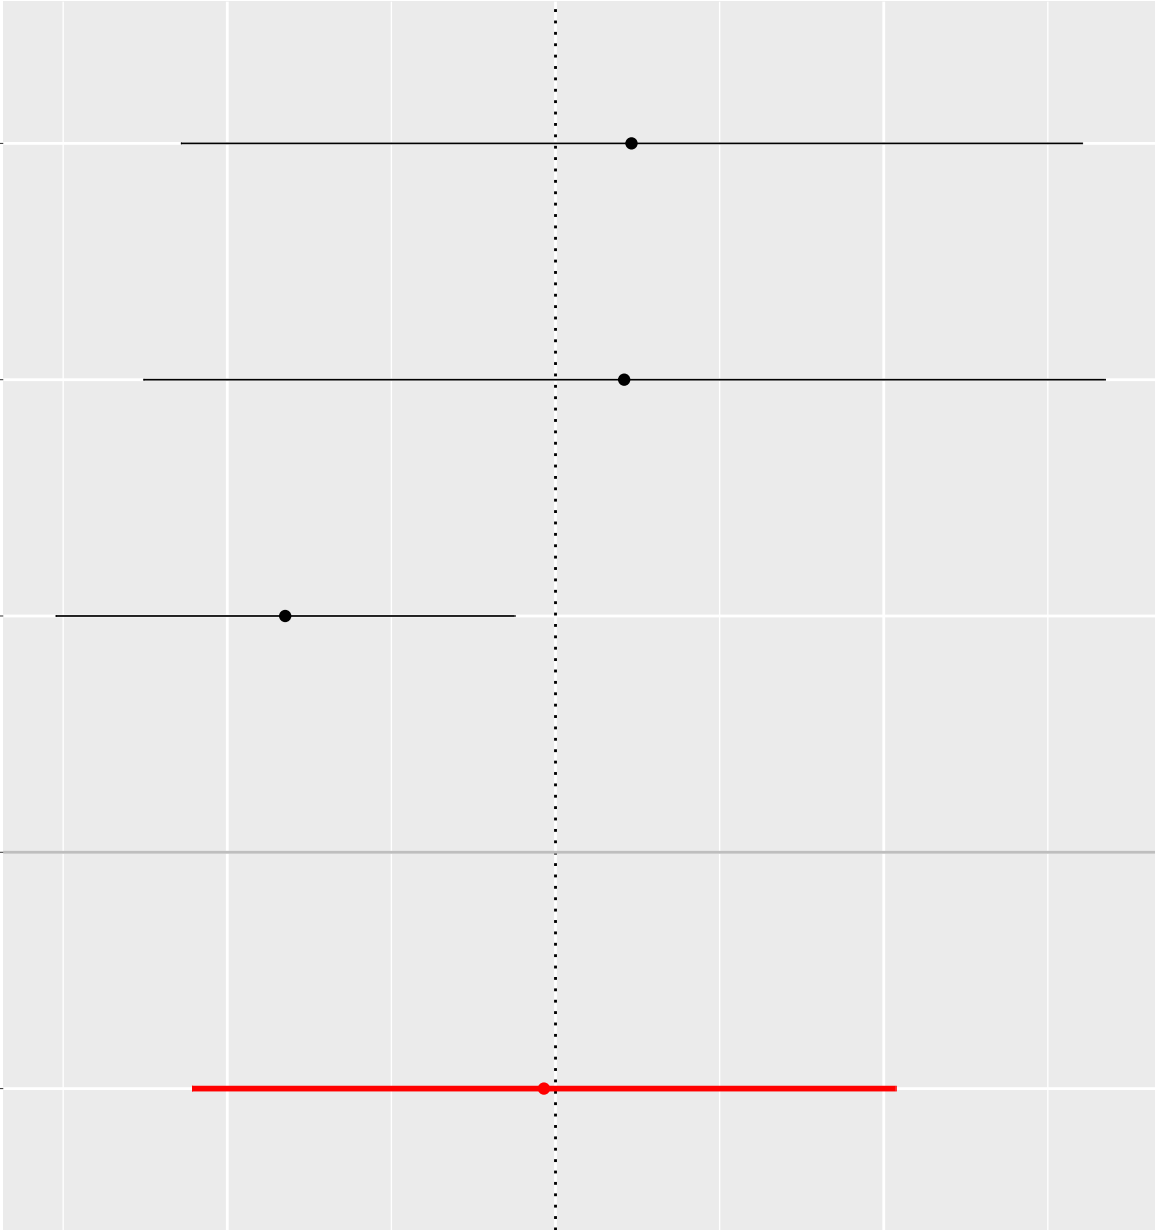

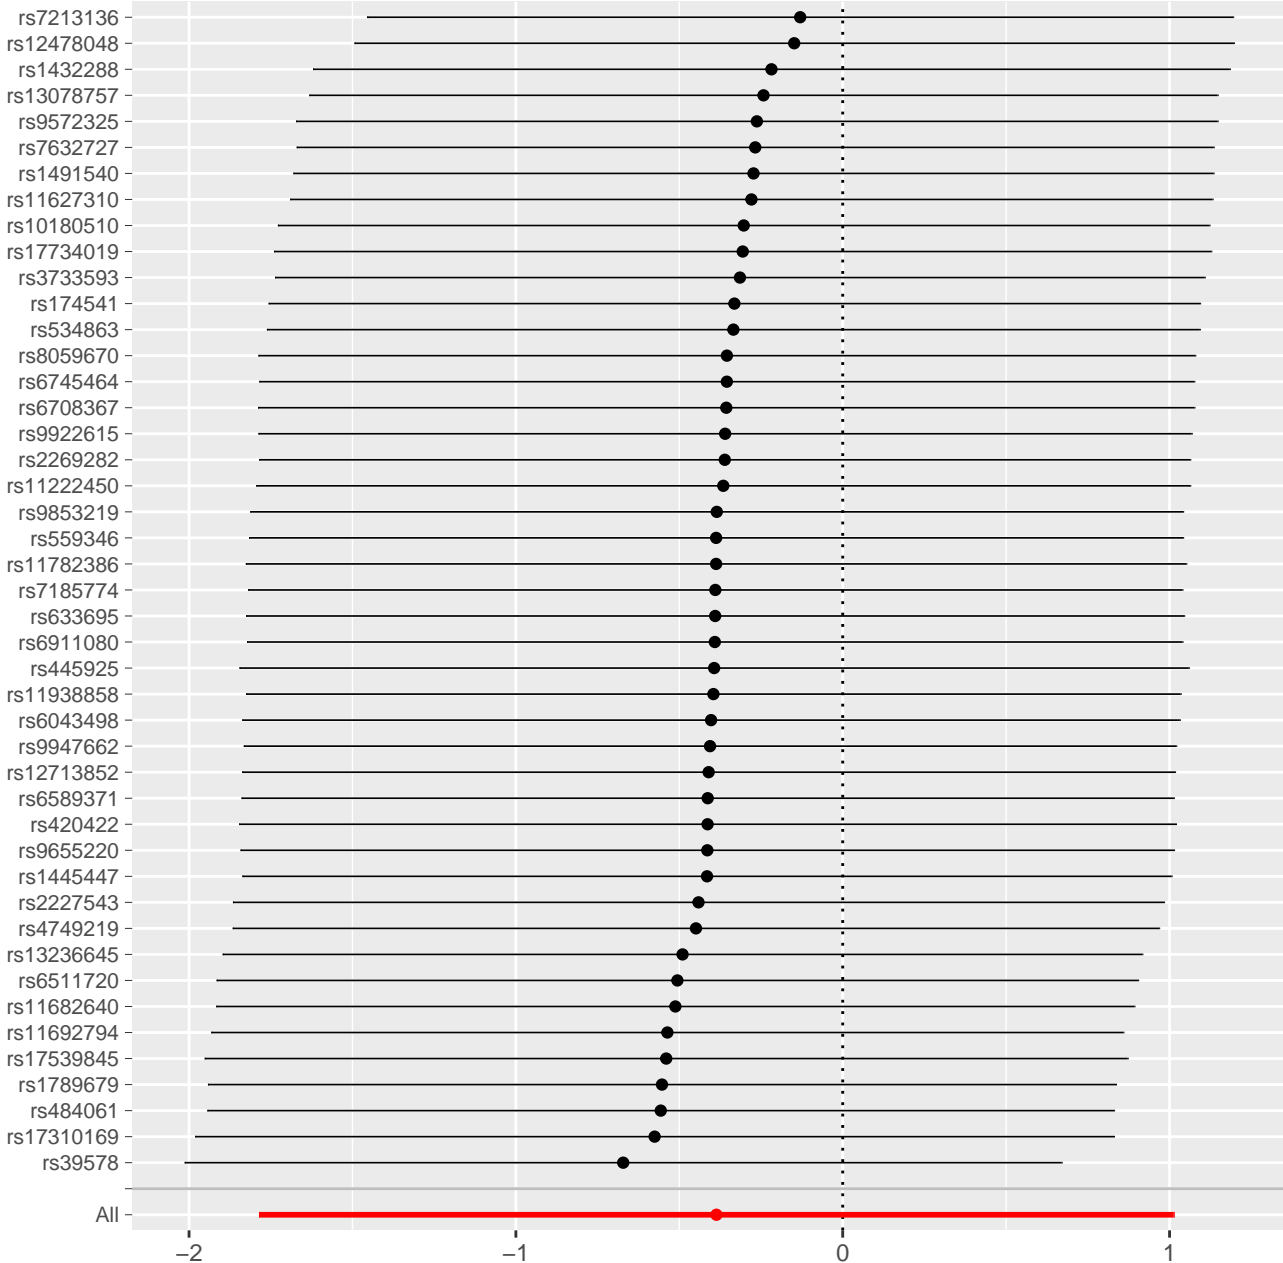

rs6089828

rs749902

rs4656083

rs2672893

All

-2.5

0.0

2.5

5.0

MR leave-one-out sensitivity analysis for  
'M38150.metal.pos.txt.gz' on 'JUVEN\_ARTHR.gz'

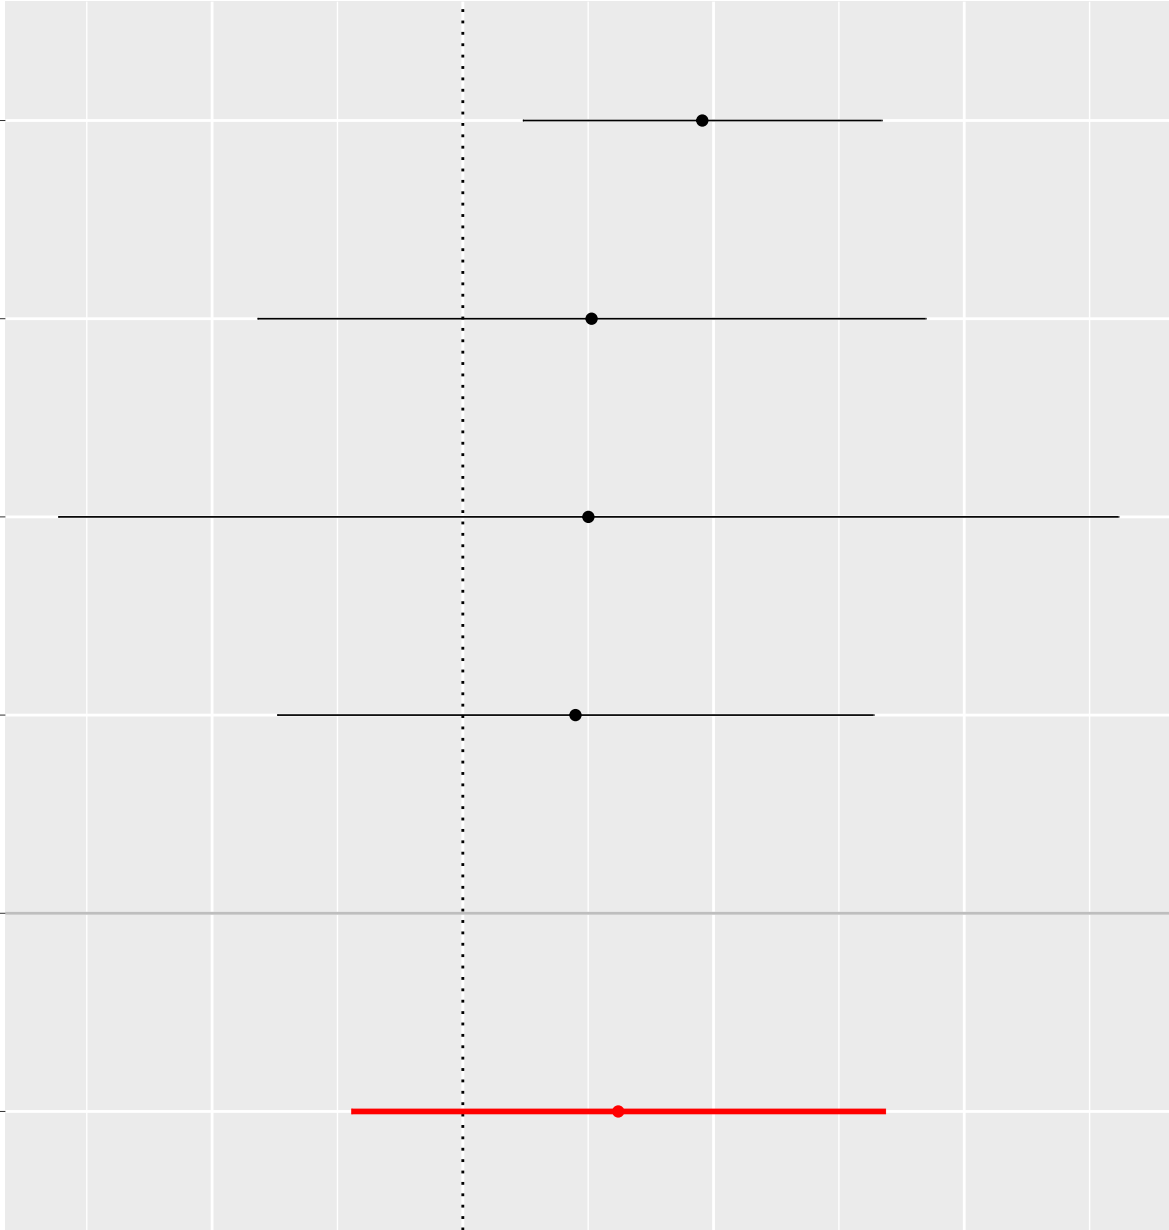

rs8396  
rs6779957  
rs10910157  
rs17638535  
rs13390807  
rs11161521  
rs11749983  
rs10873878  
rs6971411  
All

-1

0

1

MR leave-one-out sensitivity analysis for  
'M38178.metal.pos.txt.gz' on 'JUVEN\_ARTHR.gz'

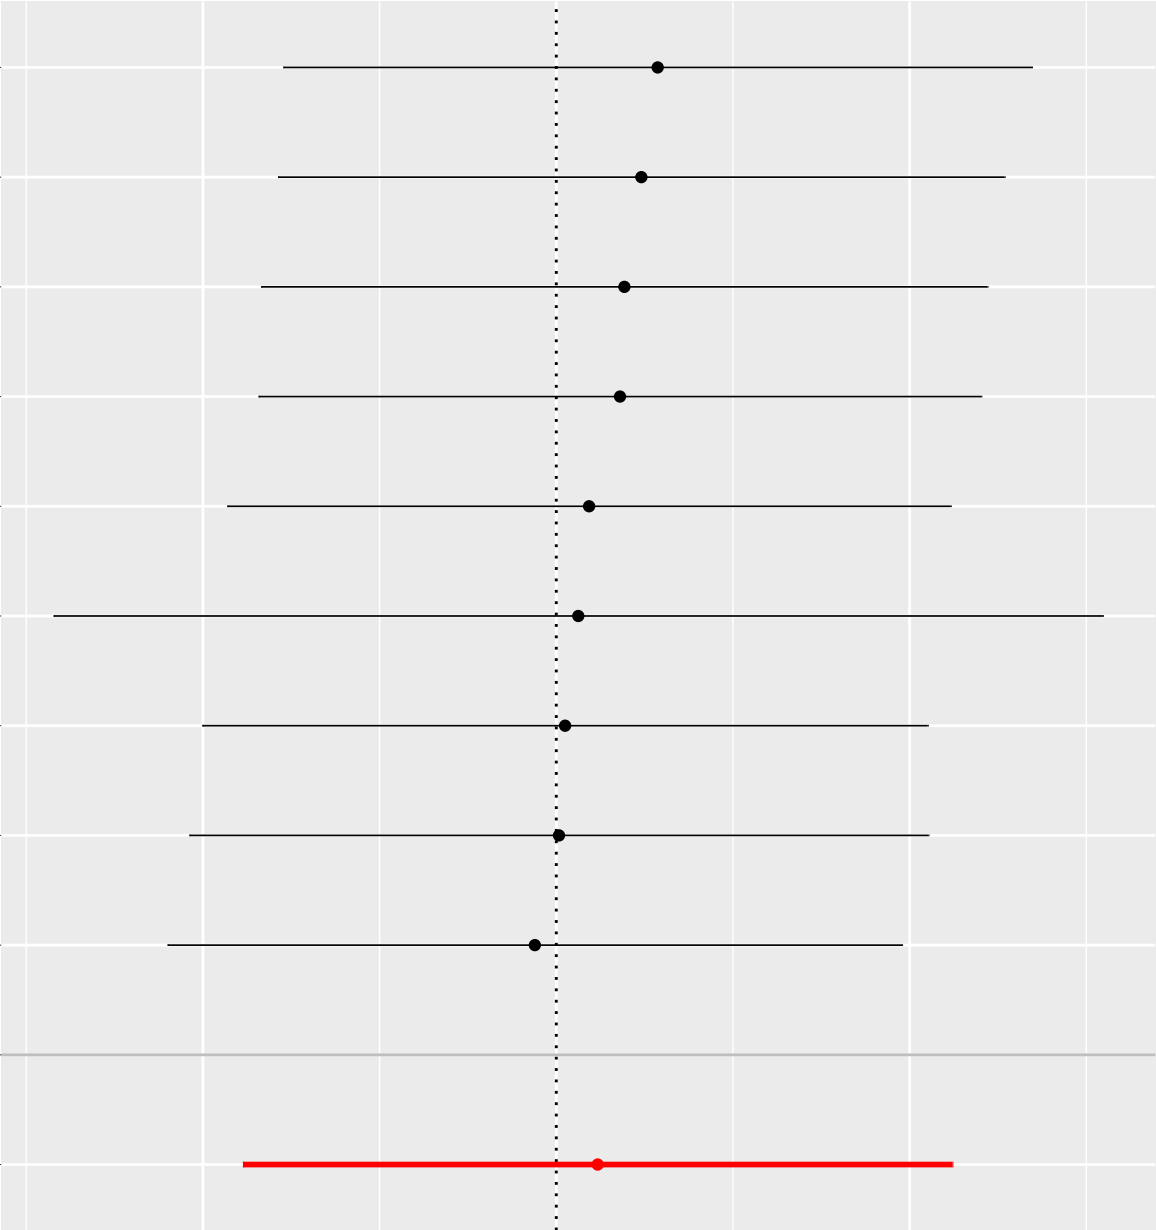

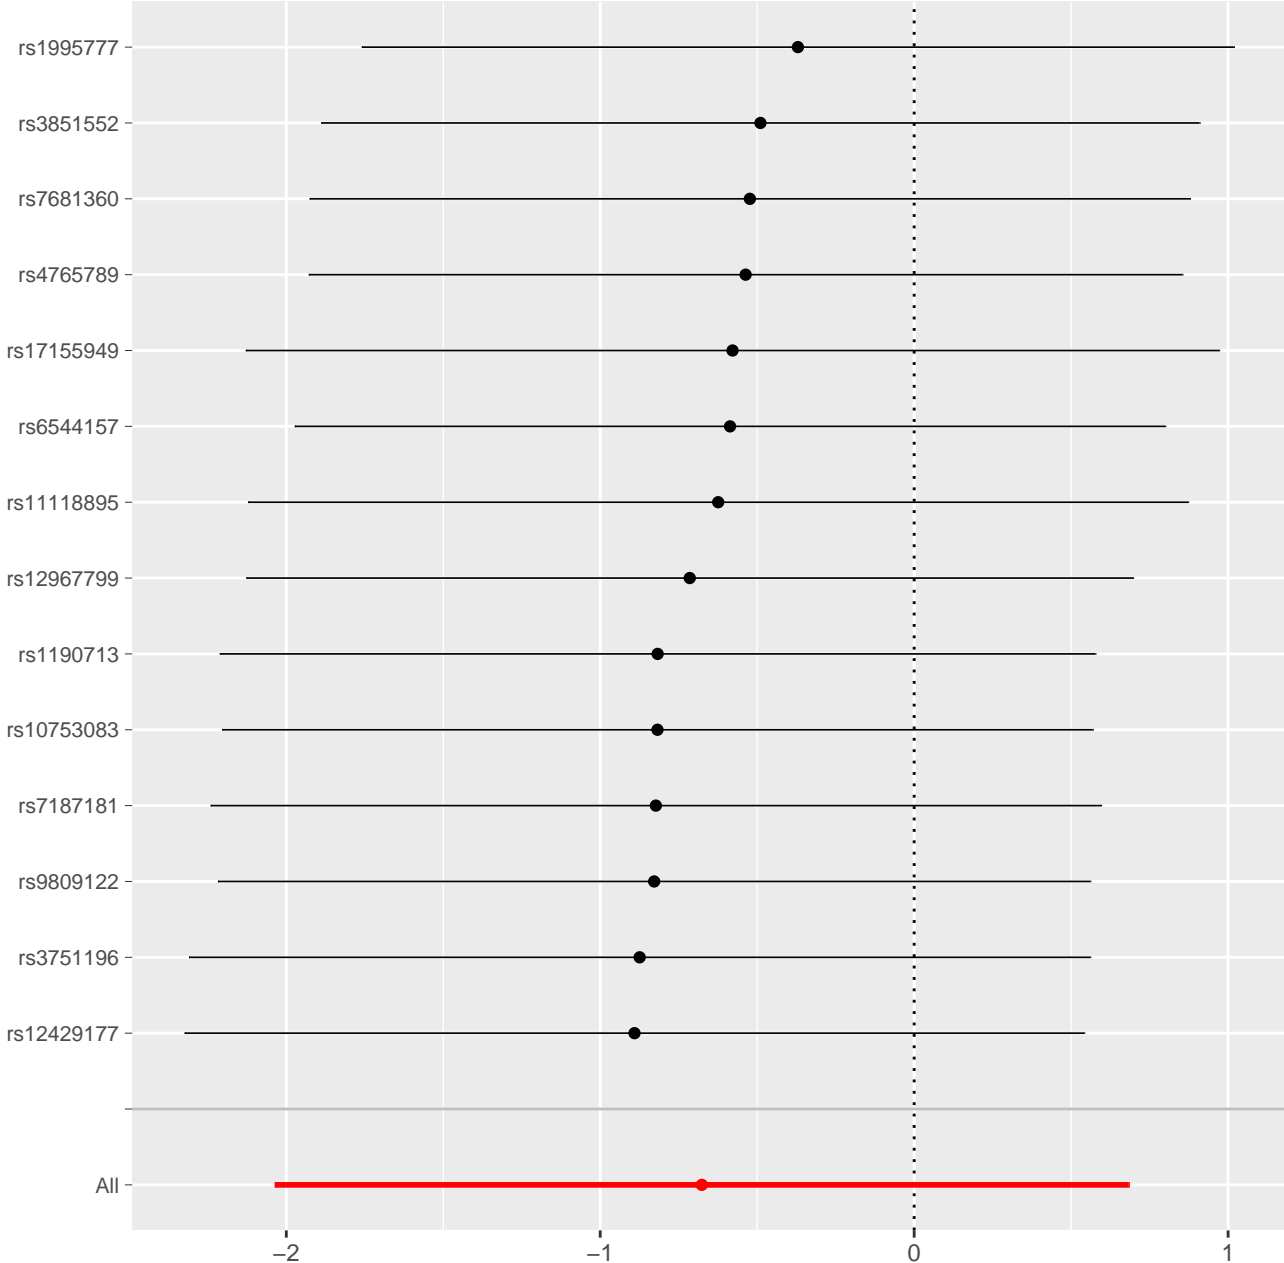

MR leave-one-out sensitivity analysis for 'M38768.metal.pos.txt.gz' on 'JUVEN\_ARTHR.gz'
